# Supplementary material
Source: MDPI journal article supplement (https://www.mdpi.com/2304-6740/7/9/105)
Supplement: s1 [file s1]

Archive with 8 entries (8 files):
- Complex1_CIF.cif
- Complex2_CIF.cif
- Complex3_CIF.cif
- Complex4_CIF.cif
- Complex1_CheckCIF.pdf
- Complex2_CheckCIF.pdf
- Complex3_CheckCIF.pdf
- Complex4_CheckCIF.pdf
