# Supplementary material
Source: MDPI journal article supplement (https://www.mdpi.com/2304-6740/7/9/105)
Supplement: s1 [file s1 › Complex1_CIF.cif]

 
data_PR5029

_audit_creation_method           SHELXL-2014/7
_shelx_SHELXL_version_number     2014/7
_chemical_name_systematic        ?
_chemical_name_common            ?
_chemical_formula_moiety         'C38 H58 P2 Si2 Th'
_chemical_formula_sum            'C38 H58 P2 Si2 Th'
_chemical_melting_point          ?

_exptl_crystal_description       Prism
_exptl_crystal_colour            Red
_diffrn_ambient_temperature      100(2)
_chemical_formula_weight         865.00

loop_
_atom_type_symbol
_atom_type_description
_atom_type_scat_dispersion_real
_atom_type_scat_dispersion_imag
_atom_type_scat_source
C C 0.0033 0.0016 'International Tables Vol C Tables 4.2.6.8 and 6.1.1.4'
H H 0.0000 0.0000 'International Tables Vol C Tables 4.2.6.8 and 6.1.1.4'
P P 0.1023 0.0942 'International Tables Vol C Tables 4.2.6.8 and 6.1.1.4'
Si Si 0.0817 0.0704 'International Tables Vol C Tables 4.2.6.8 and 6.1.1.4'
Th Th -7.2400 8.8979 'International Tables Vol C Tables 4.2.6.8 and 6.1.1.4'

_space_group_crystal_system      tetragonal
_space_group_IT_number           96
_space_group_name_H-M_alt        'P 43 21 2'
_space_group_name_Hall           'P 4nw 2abw'

_chemical_absolute_configuration ad

loop_
_space_group_symop_operation_xyz
'x, y, z'
'-y+1/2, x+1/2, z+3/4'
'-x, -y, z+1/2'
'y+1/2, -x+1/2, z+1/4'
'x+1/2, -y+1/2, -z+1/4'
'-x+1/2, y+1/2, -z+3/4'
'y, x, -z'
'-y, -x, -z+1/2'

_shelx_space_group_comment       
;
The symmetry employed for this shelxl refinement is uniquely defined
by the following loop, which should always be used as a source of
symmetry information in preference to the above space-group names.
They are only intended as comments.
;

_cell_length_a                   12.1642(12)
_cell_length_b                   12.1642(12)
_cell_length_c                   26.953(3)
_cell_angle_alpha                90
_cell_angle_beta                 90
_cell_angle_gamma                90
_cell_volume                     3988.1(9)
_cell_formula_units_Z            4
_cell_measurement_temperature    100(2)
_cell_measurement_reflns_used    9987
_cell_measurement_theta_min      2.8
_cell_measurement_theta_max      28.7
_exptl_crystal_density_meas      ?
_exptl_crystal_density_method    ?
_exptl_crystal_density_diffrn    1.441
_exptl_crystal_F_000             1736
_exptl_transmission_factor_min   ?
_exptl_transmission_factor_max   ?
_exptl_crystal_size_max          0.250
_exptl_crystal_size_mid          0.200
_exptl_crystal_size_min          0.200
_exptl_absorpt_coefficient_mu    3.903
_shelx_estimated_absorpt_T_min   0.442
_shelx_estimated_absorpt_T_max   0.509
_exptl_absorpt_correction_type   multi-scan
_exptl_absorpt_correction_T_min  0.40
_exptl_absorpt_correction_T_max  0.51
_exptl_absorpt_process_details   
;
 Data were corrected for decay and absorption using the program SADABS 
 (Sheldrick, G. M. (2003). SADABS. Version 2.10. University of
 G\"ottingen, Germany).
;
_exptl_absorpt_special_details   ?
_diffrn_radiation_probe          ?
_diffrn_radiation_type           MoK\a
_diffrn_radiation_wavelength     0.71073
_diffrn_source                   ?

_diffrn_measurement_device_type  'Bruker SMART CCD area detector'
_diffrn_measurement_method       'omega scans'
_diffrn_detector_area_resol_mean ?
_diffrn_reflns_number            32720
_diffrn_reflns_av_unetI/netI     0.0270
_diffrn_reflns_av_R_equivalents  0.0433
_diffrn_reflns_limit_h_min       -16
_diffrn_reflns_limit_h_max       13
_diffrn_reflns_limit_k_min       -15
_diffrn_reflns_limit_k_max       15
_diffrn_reflns_limit_l_min       -36
_diffrn_reflns_limit_l_max       36
_diffrn_reflns_theta_min         2.486
_diffrn_reflns_theta_max         28.738
_diffrn_reflns_theta_full        25.242
_diffrn_measured_fraction_theta_max 0.997
_diffrn_measured_fraction_theta_full 0.998
_diffrn_reflns_Laue_measured_fraction_max 0.997
_diffrn_reflns_Laue_measured_fraction_full 0.998
_diffrn_reflns_point_group_measured_fraction_max 0.997
_diffrn_reflns_point_group_measured_fraction_full 0.999
_reflns_number_total             5170
_reflns_number_gt                4903
_reflns_threshold_expression     'I > 2\s(I)'
_reflns_Friedel_coverage         0.711
_reflns_Friedel_fraction_max     0.998
_reflns_Friedel_fraction_full    1.000

_reflns_special_details          
;
 Reflections were merged by SHELXL according to the crystal
 class for the calculation of statistics and refinement.
 
 _reflns_Friedel_fraction is defined as the number of unique
 Friedel pairs measured divided by the number that would be
 possible theoretically, ignoring centric projections and
 systematic absences.
;

_computing_data_collection       'SMART (Bruker, 1998)'
_computing_cell_refinement       'SAINT (Bruker, 1998)'
_computing_data_reduction        'SAINT (Bruker, 1998)'
_computing_structure_solution    'SHELXS-97 (Sheldrick, 1997)'
_computing_structure_refinement  'SHELXL-97 (Sheldrick, 1997)'
_computing_molecular_graphics    'ORTEP-III (Burnett & Johnson, 1996)'
_computing_publication_material  'CIFTAB (Sheldrick, 1997)'
_refine_special_details          ?
_refine_ls_structure_factor_coef Fsqd
_refine_ls_matrix_type           full
_refine_ls_weighting_scheme      calc
_refine_ls_weighting_details     
'w=1/[\s^2^(Fo^2^)+(0.0178P)^2^+1.6384P] where P=(Fo^2^+2Fc^2^)/3'
_atom_sites_solution_primary     iterative
_atom_sites_solution_secondary   difmap
_atom_sites_solution_hydrogens   geom
_refine_ls_hydrogen_treatment    constr
_refine_ls_extinction_method     none
_refine_ls_extinction_coef       .
_refine_ls_abs_structure_details 
;
 Flack x determined using 1950 quotients [(I+)-(I-)]/[(I+)+(I-)]
 (Parsons, Flack and Wagner, Acta Cryst. B69 (2013) 249-259).
;
_refine_ls_abs_structure_Flack   -0.009(3)
_refine_ls_number_reflns         5170
_refine_ls_number_parameters     203
_refine_ls_number_restraints     0
_refine_ls_R_factor_all          0.0229
_refine_ls_R_factor_gt           0.0203
_refine_ls_wR_factor_ref         0.0424
_refine_ls_wR_factor_gt          0.0416
_refine_ls_goodness_of_fit_ref   1.077
_refine_ls_restrained_S_all      1.077
_refine_ls_shift/su_max          0.002
_refine_ls_shift/su_mean         0.000

loop_
_atom_site_label
_atom_site_type_symbol
_atom_site_fract_x
_atom_site_fract_y
_atom_site_fract_z
_atom_site_U_iso_or_equiv
_atom_site_adp_type
_atom_site_occupancy
_atom_site_site_symmetry_order
_atom_site_calc_flag
_atom_site_refinement_flags_posn
_atom_site_refinement_flags_adp
_atom_site_refinement_flags_occupancy
_atom_site_disorder_assembly
_atom_site_disorder_group
Th1 Th 0.52316(2) 0.47684(2) 0.2500 0.01350(5) Uani 1 2 d S T P . .
P1 P 0.29194(7) 0.47217(9) 0.25929(3) 0.02120(18) Uani 1 1 d . . . . .
Si1 Si 0.17947(9) 0.57259(10) 0.30612(4) 0.0243(2) Uani 1 1 d . . . . .
C1 C 0.5320(3) 0.4429(3) 0.35250(11) 0.0206(7) Uani 1 1 d . . . . .
C2 C 0.5922(3) 0.3547(3) 0.33105(14) 0.0248(8) Uani 1 1 d . . . . .
C3 C 0.6912(3) 0.3982(4) 0.31182(14) 0.0274(9) Uani 1 1 d . . . . .
C4 C 0.6915(3) 0.5132(4) 0.32027(13) 0.0238(8) Uani 1 1 d . . . . .
C5 C 0.5934(3) 0.5408(3) 0.34631(11) 0.0196(8) Uani 1 1 d . . . . .
C6 C 0.4301(3) 0.4300(3) 0.38383(12) 0.0282(8) Uani 1 1 d . . . . .
H6A H 0.4499 0.3972 0.4158 0.042 Uiso 1 1 calc R U . . .
H6B H 0.3776 0.3821 0.3667 0.042 Uiso 1 1 calc R U . . .
H6C H 0.3966 0.5022 0.3894 0.042 Uiso 1 1 calc R U . . .
C7 C 0.5567(4) 0.2365(3) 0.33389(17) 0.0379(11) Uani 1 1 d . . . . .
H7A H 0.6126 0.1898 0.3184 0.057 Uiso 1 1 calc R U . . .
H7B H 0.4866 0.2274 0.3164 0.057 Uiso 1 1 calc R U . . .
H7C H 0.5477 0.2152 0.3687 0.057 Uiso 1 1 calc R U . . .
C8 C 0.7929(4) 0.3356(4) 0.29598(18) 0.0406(12) Uani 1 1 d . . . . .
H8A H 0.8514 0.3469 0.3204 0.061 Uiso 1 1 calc R U . . .
H8B H 0.8173 0.3623 0.2635 0.061 Uiso 1 1 calc R U . . .
H8C H 0.7757 0.2570 0.2938 0.061 Uiso 1 1 calc R U . . .
C9 C 0.7892(3) 0.5866(4) 0.31076(16) 0.0354(11) Uani 1 1 d . . . . .
H9A H 0.8496 0.5657 0.3329 0.053 Uiso 1 1 calc R U . . .
H9B H 0.7687 0.6633 0.3170 0.053 Uiso 1 1 calc R U . . .
H9C H 0.8129 0.5785 0.2762 0.053 Uiso 1 1 calc R U . . .
C10 C 0.5673(4) 0.6487(3) 0.37035(13) 0.0266(8) Uani 1 1 d . . . . .
H10A H 0.4946 0.6737 0.3594 0.040 Uiso 1 1 calc R U . . .
H10B H 0.6228 0.7031 0.3609 0.040 Uiso 1 1 calc R U . . .
H10C H 0.5674 0.6398 0.4065 0.040 Uiso 1 1 calc R U . . .
C11 C 0.2602(4) 0.6845(4) 0.33680(17) 0.0371(11) Uani 1 1 d . . . . .
H11A H 0.3142 0.7140 0.3133 0.056 Uiso 1 1 calc R U . . .
H11B H 0.2985 0.6547 0.3658 0.056 Uiso 1 1 calc R U . . .
H11C H 0.2103 0.7433 0.3473 0.056 Uiso 1 1 calc R U . . .
C12 C 0.1084(3) 0.4850(4) 0.35359(15) 0.0359(10) Uani 1 1 d . . . . .
H12A H 0.1629 0.4550 0.3767 0.054 Uiso 1 1 calc R U . . .
H12B H 0.0701 0.4245 0.3369 0.054 Uiso 1 1 calc R U . . .
H12C H 0.0551 0.5297 0.3719 0.054 Uiso 1 1 calc R U . . .
C13 C 0.0721(4) 0.6377(4) 0.26573(15) 0.0357(10) Uani 1 1 d . . . . .
H13A H 0.0234 0.6832 0.2862 0.054 Uiso 1 1 calc R U . . .
H13B H 0.0290 0.5802 0.2493 0.054 Uiso 1 1 calc R U . . .
H13C H 0.1078 0.6837 0.2406 0.054 Uiso 1 1 calc R U . . .
C14 C 0.2000(3) 0.3562(3) 0.24466(14) 0.0214(7) Uani 1 1 d . . . . .
C15 C 0.2046(4) 0.2590(4) 0.27132(14) 0.0292(9) Uani 1 1 d . . . . .
H15 H 0.2554 0.2523 0.2979 0.035 Uiso 1 1 calc R U . . .
C16 C 0.1360(4) 0.1706(4) 0.25996(15) 0.0364(11) Uani 1 1 d . . . . .
H16 H 0.1412 0.1044 0.2785 0.044 Uiso 1 1 calc R U . . .
C17 C 0.0608(4) 0.1790(4) 0.22199(15) 0.0374(11) Uani 1 1 d . . . . .
H17 H 0.0141 0.1188 0.2143 0.045 Uiso 1 1 calc R U . . .
C18 C 0.0535(3) 0.2759(4) 0.19505(15) 0.0318(10) Uani 1 1 d . . . . .
H18 H 0.0013 0.2821 0.1690 0.038 Uiso 1 1 calc R U . . .
C19 C 0.1221(3) 0.3639(4) 0.20602(14) 0.0251(8) Uani 1 1 d . . . . .
H19 H 0.1166 0.4299 0.1873 0.030 Uiso 1 1 calc R U . . .

loop_
_atom_site_aniso_label
_atom_site_aniso_U_11
_atom_site_aniso_U_22
_atom_site_aniso_U_33
_atom_site_aniso_U_23
_atom_site_aniso_U_13
_atom_site_aniso_U_12
Th1 0.01154(5) 0.01154(5) 0.01742(7) 0.00006(4) 0.00006(4) 0.00091(7)
P1 0.0122(4) 0.0251(5) 0.0263(4) -0.0089(4) 0.0015(3) -0.0007(4)
Si1 0.0158(5) 0.0285(6) 0.0286(5) -0.0065(5) 0.0029(4) 0.0035(5)
C1 0.0202(18) 0.0215(17) 0.0201(14) 0.0039(11) -0.0035(13) -0.0010(15)
C2 0.027(2) 0.0196(19) 0.0276(18) 0.0079(14) -0.0028(15) 0.0014(15)
C3 0.024(2) 0.032(2) 0.0264(18) 0.0094(16) -0.0052(15) 0.0070(18)
C4 0.0151(16) 0.031(2) 0.0256(17) 0.0105(16) -0.0069(12) -0.0037(17)
C5 0.0205(18) 0.021(2) 0.0178(14) 0.0045(12) -0.0066(12) -0.0050(14)
C6 0.027(2) 0.033(2) 0.0246(16) 0.0043(15) 0.0023(15) -0.0085(17)
C7 0.049(3) 0.022(2) 0.043(2) 0.0100(18) 0.003(2) 0.004(2)
C8 0.027(2) 0.048(3) 0.048(3) 0.012(2) -0.002(2) 0.022(2)
C9 0.018(2) 0.049(3) 0.039(2) 0.015(2) -0.0101(17) -0.008(2)
C10 0.031(2) 0.024(2) 0.0248(17) -0.0015(15) -0.0061(16) -0.0065(17)
C11 0.030(2) 0.031(2) 0.050(3) -0.020(2) 0.0005(19) 0.0080(19)
C12 0.029(2) 0.043(3) 0.036(2) -0.001(2) 0.0125(16) 0.008(2)
C13 0.021(2) 0.047(3) 0.039(2) 0.0008(18) 0.0035(17) 0.011(2)
C14 0.0162(16) 0.0263(19) 0.0218(17) -0.0062(15) 0.0021(15) -0.0004(14)
C15 0.032(2) 0.032(2) 0.0238(17) -0.0003(15) 0.0020(15) -0.0045(18)
C16 0.048(3) 0.028(2) 0.033(2) 0.0024(16) 0.0089(18) -0.010(2)
C17 0.035(2) 0.039(3) 0.037(2) -0.0162(19) 0.0096(19) -0.018(2)
C18 0.023(2) 0.043(3) 0.030(2) -0.0153(18) -0.0011(15) -0.0068(18)
C19 0.0168(19) 0.033(2) 0.0251(18) -0.0044(16) 0.0016(14) -0.0003(17)

_geom_special_details            
;
 All esds (except the esd in the dihedral angle between two l.s. planes)
 are estimated using the full covariance matrix.  The cell esds are taken
 into account individually in the estimation of esds in distances, angles
 and torsion angles; correlations between esds in cell parameters are only
 used when they are defined by crystal symmetry.  An approximate (isotropic)
 treatment of cell esds is used for estimating esds involving l.s. planes.
;

loop_
_geom_bond_atom_site_label_1
_geom_bond_atom_site_label_2
_geom_bond_distance
_geom_bond_site_symmetry_2
_geom_bond_publ_flag
Th1 C2 2.772(3) 8_665 ?
Th1 C2 2.772(3) . ?
Th1 C1 2.795(3) . ?
Th1 C1 2.796(3) 8_665 ?
Th1 C3 2.805(4) 8_665 ?
Th1 C3 2.805(4) . ?
Th1 C4 2.824(3) 8_665 ?
Th1 C4 2.824(3) . ?
Th1 P1 2.8243(9) . ?
Th1 P1 2.8243(9) 8_665 ?
Th1 C5 2.841(3) 8_665 ?
Th1 C5 2.841(3) . ?
P1 C14 1.843(4) . ?
P1 Si1 2.2265(14) . ?
Si1 C11 1.871(5) . ?
Si1 C13 1.876(4) . ?
Si1 C12 1.876(4) . ?
C1 C5 1.416(5) . ?
C1 C2 1.422(5) . ?
C1 C6 1.508(5) . ?
C2 C3 1.413(6) . ?
C2 C7 1.504(6) . ?
C3 C4 1.417(6) . ?
C3 C8 1.514(6) . ?
C4 C5 1.425(5) . ?
C4 C9 1.509(6) . ?
C5 C10 1.497(5) . ?
C6 H6A 0.9800 . ?
C6 H6B 0.9800 . ?
C6 H6C 0.9800 . ?
C7 H7A 0.9800 . ?
C7 H7B 0.9800 . ?
C7 H7C 0.9800 . ?
C8 H8A 0.9800 . ?
C8 H8B 0.9800 . ?
C8 H8C 0.9800 . ?
C9 H9A 0.9800 . ?
C9 H9B 0.9800 . ?
C9 H9C 0.9800 . ?
C10 H10A 0.9800 . ?
C10 H10B 0.9800 . ?
C10 H10C 0.9800 . ?
C11 H11A 0.9800 . ?
C11 H11B 0.9800 . ?
C11 H11C 0.9800 . ?
C12 H12A 0.9800 . ?
C12 H12B 0.9800 . ?
C12 H12C 0.9800 . ?
C13 H13A 0.9800 . ?
C13 H13B 0.9800 . ?
C13 H13C 0.9800 . ?
C14 C15 1.385(6) . ?
C14 C19 1.411(5) . ?
C15 C16 1.394(6) . ?
C15 H15 0.9500 . ?
C16 C17 1.377(6) . ?
C16 H16 0.9500 . ?
C17 C18 1.387(7) . ?
C17 H17 0.9500 . ?
C18 C19 1.389(6) . ?
C18 H18 0.9500 . ?
C19 H19 0.9500 . ?

loop_
_geom_angle_atom_site_label_1
_geom_angle_atom_site_label_2
_geom_angle_atom_site_label_3
_geom_angle
_geom_angle_site_symmetry_1
_geom_angle_site_symmetry_3
_geom_angle_publ_flag
C2 Th1 C2 107.22(16) 8_665 . ?
C2 Th1 C1 135.51(11) 8_665 . ?
C2 Th1 C1 29.59(11) . . ?
C2 Th1 C1 29.59(11) 8_665 8_665 ?
C2 Th1 C1 135.51(11) . 8_665 ?
C1 Th1 C1 164.87(15) . 8_665 ?
C2 Th1 C3 29.35(12) 8_665 8_665 ?
C2 Th1 C3 88.52(12) . 8_665 ?
C1 Th1 C3 117.79(11) . 8_665 ?
C1 Th1 C3 48.29(11) 8_665 8_665 ?
C2 Th1 C3 88.52(12) 8_665 . ?
C2 Th1 C3 29.35(12) . . ?
C1 Th1 C3 48.29(11) . . ?
C1 Th1 C3 117.79(11) 8_665 . ?
C3 Th1 C3 81.72(17) 8_665 . ?
C2 Th1 C4 48.37(12) 8_665 8_665 ?
C2 Th1 C4 100.79(11) . 8_665 ?
C1 Th1 C4 124.16(10) . 8_665 ?
C1 Th1 C4 48.13(10) 8_665 8_665 ?
C3 Th1 C4 29.15(13) 8_665 8_665 ?
C3 Th1 C4 105.38(12) . 8_665 ?
C2 Th1 C4 100.79(11) 8_665 . ?
C2 Th1 C4 48.37(12) . . ?
C1 Th1 C4 48.13(10) . . ?
C1 Th1 C4 124.17(10) 8_665 . ?
C3 Th1 C4 105.38(12) 8_665 . ?
C3 Th1 C4 29.15(13) . . ?
C4 Th1 C4 132.59(18) 8_665 . ?
C2 Th1 P1 126.69(8) 8_665 . ?
C2 Th1 P1 102.78(9) . . ?
C1 Th1 P1 87.00(8) . . ?
C1 Th1 P1 103.53(7) 8_665 . ?
C3 Th1 P1 112.18(9) 8_665 . ?
C3 Th1 P1 131.77(9) . . ?
C4 Th1 P1 83.63(9) 8_665 . ?
C4 Th1 P1 131.74(8) . . ?
C2 Th1 P1 102.78(9) 8_665 8_665 ?
C2 Th1 P1 126.69(8) . 8_665 ?
C1 Th1 P1 103.53(7) . 8_665 ?
C1 Th1 P1 87.00(8) 8_665 8_665 ?
C3 Th1 P1 131.77(9) 8_665 8_665 ?
C3 Th1 P1 112.18(9) . 8_665 ?
C4 Th1 P1 131.75(8) 8_665 8_665 ?
C4 Th1 P1 83.63(9) . 8_665 ?
P1 Th1 P1 92.75(5) . 8_665 ?
C2 Th1 C5 48.38(11) 8_665 8_665 ?
C2 Th1 C5 129.92(11) . 8_665 ?
C1 Th1 C5 150.33(10) . 8_665 ?
C1 Th1 C5 29.09(9) 8_665 8_665 ?
C3 Th1 C5 48.06(11) 8_665 8_665 ?
C3 Th1 C5 129.77(11) . 8_665 ?
C4 Th1 C5 29.13(10) 8_665 8_665 ?
C4 Th1 C5 149.13(11) . 8_665 ?
P1 Th1 C5 78.59(7) . 8_665 ?
P1 Th1 C5 102.95(7) 8_665 8_665 ?
C2 Th1 C5 129.92(11) 8_665 . ?
C2 Th1 C5 48.38(11) . . ?
C1 Th1 C5 29.09(9) . . ?
C1 Th1 C5 150.33(10) 8_665 . ?
C3 Th1 C5 129.77(12) 8_665 . ?
C3 Th1 C5 48.06(11) . . ?
C4 Th1 C5 149.13(11) 8_665 . ?
C4 Th1 C5 29.13(10) . . ?
P1 Th1 C5 102.94(7) . . ?
P1 Th1 C5 78.59(7) 8_665 . ?
C5 Th1 C5 177.83(15) 8_665 . ?
C14 P1 Si1 99.70(12) . . ?
C14 P1 Th1 126.92(12) . . ?
Si1 P1 Th1 130.62(5) . . ?
C11 Si1 C13 108.4(2) . . ?
C11 Si1 C12 110.7(2) . . ?
C13 Si1 C12 108.4(2) . . ?
C11 Si1 P1 109.09(14) . . ?
C13 Si1 P1 109.29(14) . . ?
C12 Si1 P1 110.99(16) . . ?
C5 C1 C2 108.3(3) . . ?
C5 C1 C6 125.9(3) . . ?
C2 C1 C6 125.0(3) . . ?
C5 C1 Th1 77.25(16) . . ?
C2 C1 Th1 74.30(18) . . ?
C6 C1 Th1 122.5(2) . . ?
C3 C2 C1 107.8(3) . . ?
C3 C2 C7 128.4(4) . . ?
C1 C2 C7 123.5(4) . . ?
C3 C2 Th1 76.6(2) . . ?
C1 C2 Th1 76.11(19) . . ?
C7 C2 Th1 117.7(3) . . ?
C2 C3 C4 108.2(3) . . ?
C2 C3 C8 127.6(4) . . ?
C4 C3 C8 122.7(4) . . ?
C2 C3 Th1 74.0(2) . . ?
C4 C3 Th1 76.2(2) . . ?
C8 C3 Th1 126.8(3) . . ?
C3 C4 C5 108.1(3) . . ?
C3 C4 C9 124.0(4) . . ?
C5 C4 C9 127.1(4) . . ?
C3 C4 Th1 74.7(2) . . ?
C5 C4 Th1 76.11(18) . . ?
C9 C4 Th1 123.4(2) . . ?
C1 C5 C4 107.5(3) . . ?
C1 C5 C10 125.1(3) . . ?
C4 C5 C10 126.7(3) . . ?
C1 C5 Th1 73.66(17) . . ?
C4 C5 Th1 74.77(19) . . ?
C10 C5 Th1 124.9(2) . . ?
C1 C6 H6A 109.5 . . ?
C1 C6 H6B 109.5 . . ?
H6A C6 H6B 109.5 . . ?
C1 C6 H6C 109.5 . . ?
H6A C6 H6C 109.5 . . ?
H6B C6 H6C 109.5 . . ?
C2 C7 H7A 109.5 . . ?
C2 C7 H7B 109.5 . . ?
H7A C7 H7B 109.5 . . ?
C2 C7 H7C 109.5 . . ?
H7A C7 H7C 109.5 . . ?
H7B C7 H7C 109.5 . . ?
C3 C8 H8A 109.5 . . ?
C3 C8 H8B 109.5 . . ?
H8A C8 H8B 109.5 . . ?
C3 C8 H8C 109.5 . . ?
H8A C8 H8C 109.5 . . ?
H8B C8 H8C 109.5 . . ?
C4 C9 H9A 109.5 . . ?
C4 C9 H9B 109.5 . . ?
H9A C9 H9B 109.5 . . ?
C4 C9 H9C 109.5 . . ?
H9A C9 H9C 109.5 . . ?
H9B C9 H9C 109.5 . . ?
C5 C10 H10A 109.5 . . ?
C5 C10 H10B 109.5 . . ?
H10A C10 H10B 109.5 . . ?
C5 C10 H10C 109.5 . . ?
H10A C10 H10C 109.5 . . ?
H10B C10 H10C 109.5 . . ?
Si1 C11 H11A 109.5 . . ?
Si1 C11 H11B 109.5 . . ?
H11A C11 H11B 109.5 . . ?
Si1 C11 H11C 109.5 . . ?
H11A C11 H11C 109.5 . . ?
H11B C11 H11C 109.5 . . ?
Si1 C12 H12A 109.5 . . ?
Si1 C12 H12B 109.5 . . ?
H12A C12 H12B 109.5 . . ?
Si1 C12 H12C 109.5 . . ?
H12A C12 H12C 109.5 . . ?
H12B C12 H12C 109.5 . . ?
Si1 C13 H13A 109.5 . . ?
Si1 C13 H13B 109.5 . . ?
H13A C13 H13B 109.5 . . ?
Si1 C13 H13C 109.5 . . ?
H13A C13 H13C 109.5 . . ?
H13B C13 H13C 109.5 . . ?
C15 C14 C19 117.8(4) . . ?
C15 C14 P1 121.2(3) . . ?
C19 C14 P1 121.0(3) . . ?
C14 C15 C16 121.3(4) . . ?
C14 C15 H15 119.3 . . ?
C16 C15 H15 119.3 . . ?
C17 C16 C15 120.3(4) . . ?
C17 C16 H16 119.9 . . ?
C15 C16 H16 119.9 . . ?
C16 C17 C18 119.6(4) . . ?
C16 C17 H17 120.2 . . ?
C18 C17 H17 120.2 . . ?
C17 C18 C19 120.3(4) . . ?
C17 C18 H18 119.8 . . ?
C19 C18 H18 119.8 . . ?
C18 C19 C14 120.6(4) . . ?
C18 C19 H19 119.7 . . ?
C14 C19 H19 119.7 . . ?

loop_
_geom_torsion_atom_site_label_1
_geom_torsion_atom_site_label_2
_geom_torsion_atom_site_label_3
_geom_torsion_atom_site_label_4
_geom_torsion
_geom_torsion_site_symmetry_1
_geom_torsion_site_symmetry_2
_geom_torsion_site_symmetry_3
_geom_torsion_site_symmetry_4
_geom_torsion_publ_flag
C5 C1 C2 C3 0.3(4) . . . . ?
C6 C1 C2 C3 -170.3(3) . . . . ?
Th1 C1 C2 C3 70.7(3) . . . . ?
C5 C1 C2 C7 175.3(3) . . . . ?
C6 C1 C2 C7 4.7(6) . . . . ?
Th1 C1 C2 C7 -114.3(4) . . . . ?
C5 C1 C2 Th1 -70.4(2) . . . . ?
C6 C1 C2 Th1 119.0(3) . . . . ?
C1 C2 C3 C4 -1.2(4) . . . . ?
C7 C2 C3 C4 -175.9(4) . . . . ?
Th1 C2 C3 C4 69.2(3) . . . . ?
C1 C2 C3 C8 165.1(4) . . . . ?
C7 C2 C3 C8 -9.6(7) . . . . ?
Th1 C2 C3 C8 -124.5(4) . . . . ?
C1 C2 C3 Th1 -70.4(2) . . . . ?
C7 C2 C3 Th1 115.0(4) . . . . ?
C2 C3 C4 C5 1.7(4) . . . . ?
C8 C3 C4 C5 -165.4(3) . . . . ?
Th1 C3 C4 C5 69.4(2) . . . . ?
C2 C3 C4 C9 172.1(3) . . . . ?
C8 C3 C4 C9 4.9(6) . . . . ?
Th1 C3 C4 C9 -120.2(3) . . . . ?
C2 C3 C4 Th1 -67.7(3) . . . . ?
C8 C3 C4 Th1 125.1(4) . . . . ?
C2 C1 C5 C4 0.8(3) . . . . ?
C6 C1 C5 C4 171.2(3) . . . . ?
Th1 C1 C5 C4 -67.7(2) . . . . ?
C2 C1 C5 C10 -170.1(3) . . . . ?
C6 C1 C5 C10 0.4(5) . . . . ?
Th1 C1 C5 C10 121.5(3) . . . . ?
C2 C1 C5 Th1 68.5(2) . . . . ?
C6 C1 C5 Th1 -121.1(3) . . . . ?
C3 C4 C5 C1 -1.5(4) . . . . ?
C9 C4 C5 C1 -171.5(3) . . . . ?
Th1 C4 C5 C1 66.9(2) . . . . ?
C3 C4 C5 C10 169.1(3) . . . . ?
C9 C4 C5 C10 -0.9(6) . . . . ?
Th1 C4 C5 C10 -122.4(3) . . . . ?
C3 C4 C5 Th1 -68.5(3) . . . . ?
C9 C4 C5 Th1 121.6(4) . . . . ?
Si1 P1 C14 C15 -97.6(3) . . . . ?
Th1 P1 C14 C15 65.1(3) . . . . ?
Si1 P1 C14 C19 82.0(3) . . . . ?
Th1 P1 C14 C19 -115.3(3) . . . . ?
C19 C14 C15 C16 1.1(6) . . . . ?
P1 C14 C15 C16 -179.2(3) . . . . ?
C14 C15 C16 C17 -0.8(6) . . . . ?
C15 C16 C17 C18 0.0(6) . . . . ?
C16 C17 C18 C19 0.4(6) . . . . ?
C17 C18 C19 C14 -0.1(6) . . . . ?
C15 C14 C19 C18 -0.7(5) . . . . ?
P1 C14 C19 C18 179.7(3) . . . . ?

_refine_diff_density_max         1.658
_refine_diff_density_min         -1.569
_refine_diff_density_rms         0.082

_shelx_res_file                  
;

    C:\Xtals\Walensky\Ken\PR5029\PR5029.res created by SHELXL-2014/7

TITL PR5029_a.res in P4(3)2(1)2
CELL 0.71073 12.1642 12.1642 26.9528 90.000 90.000 90.000
ZERR 4.0000 0.0012 0.0012 0.0028 0.000 0.000 0.000
LATT -1
SYMM 0.5-Y, 0.5+X, 0.75+Z
SYMM -X, -Y, 0.5+Z
SYMM 0.5+Y, 0.5-X, 0.25+Z
SYMM 0.5+X, 0.5-Y, 0.25-Z
SYMM 0.5-X, 0.5+Y, 0.75-Z
SYMM Y, X, -Z
SYMM -Y, -X, 0.5-Z
SFAC C H P SI TH
UNIT 152 232 8 8 4
BOND $H
CONF
OMIT 0 1 1
OMIT 0 1 2
ACTA
FMAP 2 1 53
PLAN 20 0 0
LIST 6 1
SIZE 0.20 0.20 0.25
TEMP -173
L.S. 10
WGHT    0.017800    1.638400
FVAR       0.08851
TH1   5    0.523156    0.476844    0.250000    10.50000    0.01154    0.01154 =
         0.01742    0.00006    0.00006    0.00091
P1    3    0.291936    0.472173    0.259285    11.00000    0.01217    0.02508 =
         0.02634   -0.00885    0.00153   -0.00075
SI1   4    0.179471    0.572591    0.306125    11.00000    0.01582    0.02852 =
         0.02861   -0.00645    0.00285    0.00352
C1    1    0.531964    0.442864    0.352501    11.00000    0.02016    0.02151 =
         0.02007    0.00392   -0.00351   -0.00102
C2    1    0.592216    0.354702    0.331049    11.00000    0.02709    0.01961 =
         0.02763    0.00794   -0.00278    0.00143
C3    1    0.691169    0.398219    0.311815    11.00000    0.02354    0.03242 =
         0.02635    0.00942   -0.00516    0.00701
C4    1    0.691492    0.513174    0.320273    11.00000    0.01507    0.03070 =
         0.02563    0.01050   -0.00693   -0.00369
C5    1    0.593389    0.540824    0.346305    11.00000    0.02050    0.02056 =
         0.01785    0.00454   -0.00662   -0.00499
C6    1    0.430103    0.429981    0.383829    11.00000    0.02690    0.03315 =
         0.02462    0.00433    0.00229   -0.00846
AFIX 137
H6A   2    0.449878    0.397188    0.415819    11.00000   -1.50000
H6B   2    0.377582    0.382146    0.366679    11.00000   -1.50000
H6C   2    0.396632    0.502233    0.389354    11.00000   -1.50000
AFIX   0
C7    1    0.556669    0.236468    0.333890    11.00000    0.04889    0.02169 =
         0.04297    0.01002    0.00256    0.00449
AFIX 137
H7A   2    0.612561    0.189753    0.318358    11.00000   -1.50000
H7B   2    0.486575    0.227405    0.316438    11.00000   -1.50000
H7C   2    0.547704    0.215194    0.368725    11.00000   -1.50000
AFIX   0
C8    1    0.792860    0.335578    0.295984    11.00000    0.02654    0.04769 =
         0.04750    0.01207   -0.00244    0.02187
AFIX 137
H8A   2    0.851404    0.346916    0.320433    11.00000   -1.50000
H8B   2    0.817337    0.362251    0.263502    11.00000   -1.50000
H8C   2    0.775654    0.257025    0.293771    11.00000   -1.50000
AFIX   0
C9    1    0.789241    0.586617    0.310763    11.00000    0.01762    0.04936 =
         0.03921    0.01493   -0.01014   -0.00771
AFIX 137
H9A   2    0.849597    0.565742    0.332929    11.00000   -1.50000
H9B   2    0.768693    0.663287    0.316985    11.00000   -1.50000
H9C   2    0.812909    0.578511    0.276201    11.00000   -1.50000
AFIX   0
C10   1    0.567311    0.648681    0.370352    11.00000    0.03059    0.02439 =
         0.02477   -0.00145   -0.00607   -0.00650
AFIX 137
H10A  2    0.494645    0.673700    0.359443    11.00000   -1.50000
H10B  2    0.622830    0.703142    0.360861    11.00000   -1.50000
H10C  2    0.567390    0.639794    0.406490    11.00000   -1.50000
AFIX   0
C11   1    0.260222    0.684462    0.336804    11.00000    0.03015    0.03132 =
         0.04987   -0.01991    0.00051    0.00801
AFIX 137
H11A  2    0.314176    0.714040    0.313333    11.00000   -1.50000
H11B  2    0.298474    0.654674    0.365843    11.00000   -1.50000
H11C  2    0.210314    0.743269    0.347306    11.00000   -1.50000
AFIX   0
C12   1    0.108421    0.485001    0.353591    11.00000    0.02907    0.04257 =
         0.03614   -0.00073    0.01255    0.00775
AFIX 137
H12A  2    0.162907    0.455015    0.376703    11.00000   -1.50000
H12B  2    0.070099    0.424499    0.336937    11.00000   -1.50000
H12C  2    0.055138    0.529729    0.371928    11.00000   -1.50000
AFIX   0
C13   1    0.072110    0.637716    0.265728    11.00000    0.02104    0.04749 =
         0.03857    0.00082    0.00352    0.01082
AFIX 137
H13A  2    0.023411    0.683223    0.286153    11.00000   -1.50000
H13B  2    0.028986    0.580207    0.249308    11.00000   -1.50000
H13C  2    0.107841    0.683741    0.240619    11.00000   -1.50000
AFIX   0
C14   1    0.199988    0.356160    0.244659    11.00000    0.01618    0.02633 =
         0.02177   -0.00624    0.00209   -0.00045
C15   1    0.204556    0.258968    0.271316    11.00000    0.03151    0.03236 =
         0.02376   -0.00035    0.00202   -0.00445
AFIX  43
H15   2    0.255439    0.252338    0.297888    11.00000   -1.20000
AFIX   0
C16   1    0.136013    0.170649    0.259959    11.00000    0.04807    0.02837 =
         0.03273    0.00241    0.00891   -0.01047
AFIX  43
H16   2    0.141249    0.104418    0.278487    11.00000   -1.20000
AFIX   0
C17   1    0.060753    0.179029    0.221991    11.00000    0.03548    0.03934 =
         0.03730   -0.01623    0.00960   -0.01840
AFIX  43
H17   2    0.014069    0.118790    0.214290    11.00000   -1.20000
AFIX   0
C18   1    0.053466    0.275906    0.195048    11.00000    0.02252    0.04260 =
         0.03014   -0.01526   -0.00105   -0.00681
AFIX  43
H18   2    0.001293    0.282125    0.168971    11.00000   -1.20000
AFIX   0
C19   1    0.122108    0.363875    0.206019    11.00000    0.01676    0.03346 =
         0.02508   -0.00436    0.00164   -0.00025
AFIX  43
H19   2    0.116563    0.429857    0.187329    11.00000   -1.20000
AFIX   0
HKLF 4

REM  PR5029_a.res in P4(3)2(1)2
REM R1 =  0.0203 for    4903 Fo > 4sig(Fo)  and  0.0229 for all    5170 data
REM    203 parameters refined using      0 restraints

END

WGHT      0.0178      1.6439

REM Highest difference peak  1.658,  deepest hole -1.569,  1-sigma level  0.082
Q1    1   0.5268  0.4725  0.2790  11.00000  0.05    1.66
Q2    1   0.5767  0.4233  0.2500  10.50000  0.05    0.76
Q3    1   0.5613  0.5375  0.2512  11.00000  0.05    0.60
Q4    1   0.3831  0.4687  0.2548  11.00000  0.05    0.54
Q5    1   0.4647  0.5353  0.2500  10.50000  0.05    0.53
Q6    1   0.3987  0.5820  0.2307  11.00000  0.05    0.43
Q7    1   0.6079  0.4862  0.2503  11.00000  0.05    0.40
Q8    1   0.6238  0.5699  0.2492  11.00000  0.05    0.33
Q9    1   0.5435  0.5000  0.3504  11.00000  0.05    0.32
Q10   1   0.6388  0.3638  0.3376  11.00000  0.05    0.32
Q11   1   0.5570  0.4013  0.3404  11.00000  0.05    0.29
Q12   1   0.3158  0.4548  0.2298  11.00000  0.05    0.29
Q13   1   0.3212  0.5124  0.2305  11.00000  0.05    0.29
Q14   1   0.6218  0.3613  0.3138  11.00000  0.05    0.28
Q15   1   0.1623  0.5276  0.3409  11.00000  0.05    0.27
Q16   1   0.5797  0.4204  0.2885  11.00000  0.05    0.27
Q17   1   0.2736  0.4650  0.3004  11.00000  0.05    0.27
Q18   1   0.7375  0.2625  0.2500  10.50000  0.05    0.26
Q19   1   0.2571  0.5125  0.2198  11.00000  0.05    0.26
Q20   1   0.2032  0.6044  0.3390  11.00000  0.05    0.25
;
_shelx_res_checksum              17134

_shelx_hkl_file                  
;
   1   0   0   -0.03    0.05
   0   1   0    0.00    0.02
   0   1   0   -0.04    0.04
   0  -1   0   -0.03    0.04
   0  -1   0    0.07    0.05
  -1   0   0   -0.01    0.02
   0  -1   0   -0.02    0.06
   0   1   0    0.03    0.05
   1   0   0    0.00    0.07
  -1   0   0   -0.07    0.04
  -1   2   0   75.76    2.68
  -1   2   0   76.94    2.68
  -2  -1   0   71.99    2.69
   1  -2   0   75.00    2.68
  -1   2   0   72.14    2.71
  -2  -1   0   71.83    2.79
  -2   0   0  568.96   21.02
   0  -2   0  626.85   21.03
   0  -2   0  601.44   20.98
  -1  -2   0   72.37    2.63
  -2   1   0   73.09    2.70
   1   2   0   73.70    2.63
  -1  -2   0   75.61    2.77
   2  -2   0  247.75    8.57
  -2   2   0  257.85    8.53
  -2   2   0  247.49    8.59
  -2  -2   0  211.30    8.63
  -2  -2   0  240.15    8.49
  -2   3   0    9.36    0.54
  -3  -2   0    9.94    0.62
  -3  -2   0    9.33    0.83
  -2   3   0    9.40    0.66
  -1   3   0  762.72   26.49
  -3  -1   0  710.15   26.48
  -1   3   0  790.56   26.48
  -3  -1   0  723.93   26.58
   1  -3   0  776.34   26.47
   1  -3   0  763.19   26.49
  -3   0   0    0.39    0.34
   0  -3   0    0.13    0.21
   0  -3   0    0.49    0.30
   0   3   0    0.07    0.19
  -3   0   0    0.29    0.29
  -1  -3   0  801.93   26.74
  -3   1   0  720.38   26.66
  -1  -3   0  745.40   26.58
  -3   1   0  768.91   26.69
  -2  -3   0   10.04    0.52
  -3   2   0    9.67    0.63
  -3   2   0   10.09    0.73
  -2  -3   0    9.02    0.82
  -3   3   0  206.69    7.44
  -3  -3   0  201.31    7.56
  -3   3   0  215.66    7.34
  -3  -3   0  198.29    7.29
  -4  -3   0   22.07    1.41
  -4  -3   0   21.33    1.04
  -3   4   0   22.11    1.17
  -3   4   0   22.69    1.01
  -2   4   0  276.42    9.43
  -4  -2   0  242.09    9.63
  -2   4   0  270.19    9.50
  -4  -2   0  271.69    9.47
   1  -4   0    4.28    0.43
  -4  -1   0    3.14    0.47
  -4  -1   0    3.65    0.61
  -1   4   0    3.14    0.38
   1  -4   0    3.89    0.42
   0  -4   0  410.82   14.22
  -4   0   0  392.22   14.35
  -4   0   0  385.91   14.29
   0   4   0  407.55   14.21
   0  -4   0  417.84   14.31
  -1  -4   0    3.69    0.34
  -4   1   0    3.79    0.52
   1   4   0    3.61    0.33
  -1  -4   0    4.51    0.55
  -4   1   0    3.87    0.49
  -4   2   0  276.27    9.82
  -4   2   0  266.55    9.74
  -2  -4   0  266.40    9.63
  -2  -4   0  282.44    9.90
  -3  -4   0   22.40    1.37
  -3  -4   0   20.86    0.95
  -4   3   0   23.62    1.08
  -4   3   0   21.85    1.23
  -4   4   0  489.67   16.69
  -4  -4   0  462.85   16.63
  -4   4   0  463.92   16.83
  -4  -4   0  471.61   16.99
  -5  -4   0   98.90    4.51
  -5  -4   0  114.99    4.14
  -4   5   0  110.04    4.33
  -4   5   0  119.85    4.14
  -3   5   0  250.92    8.93
  -5  -3   0  225.38    9.09
  -5  -3   0  253.69    8.85
  -3   5   0  252.72    8.78
   2  -5   0    0.97    0.36
  -5  -2   0    0.47    0.46
  -5  -2   0    0.73    0.62
  -2   5   0    1.17    0.35
  -2   5   0    0.69    0.37
   1  -5   0  319.22   10.83
  -5  -1   0  273.14   10.98
  -5  -1   0  291.79   10.87
  -1   5   0  317.31   10.83
   1  -5   0  314.77   10.84
   0  -5   0    0.19    0.39
   0   5   0   -0.21    0.26
  -5   0   0   -0.41    0.43
  -5   0   0   -0.29    0.47
   0  -5   0    0.67    0.31
  -1  -5   0  306.55   10.75
  -1  -5   0  324.35   10.97
  -5   1   0  291.35   10.92
   1   5   0  313.82   10.76
  -5   1   0  281.63   10.90
  -5   2   0    1.62    0.47
  -2  -5   0    0.43    0.27
  -2  -5   0    0.70    0.53
  -5   2   0    0.30    0.49
  -5   3   0  247.42    8.95
  -3  -5   0  242.92    8.81
  -5   3   0  257.74    9.09
  -3  -5   0  247.03    9.18
  -5   4   0  109.78    4.40
  -4  -5   0  112.91    4.13
  -5   4   0  115.94    4.23
  -4  -5   0  113.77    4.60
  -5  -5   0  322.25   12.09
  -5  -5   0  322.89   11.60
  -5   5   0  339.80   11.66
  -5   5   0  321.45   11.86
  -5   6   0   85.84    3.16
  -6  -5   0   83.34    3.77
  -6  -5   0   80.60    3.17
  -5   6   0   79.09    3.43
  -6  -4   0   71.73    3.72
  -4   6   0   87.60    3.51
  -4   6   0   91.96    3.29
  -6  -4   0   92.23    3.38
  -3   6   0    4.87    0.50
  -6  -3   0    3.43    0.64
  -3   6   0    3.23    0.61
  -6  -3   0    3.90    0.90
   2  -6   0  235.34    8.37
  -2   6   0  234.11    8.43
  -2   6   0  235.37    8.37
  -6  -2   0  232.19    8.69
  -6  -2   0  224.06    8.45
   1  -6   0   -0.41    0.37
  -6  -1   0   -0.12    0.51
  -6  -1   0   -0.04    0.63
  -1   6   0    0.52    0.35
  -6   0   0  173.16    6.53
   0   6   0  175.72    6.37
  -6   0   0  168.93    6.59
   0  -6   0  179.31    6.38
   0  -6   0  181.40    6.51
  -1  -6   0    0.33    0.33
  -6   1   0   -0.31    0.54
   1   6   0    0.59    0.31
  -6   1   0   -0.35    0.53
  -1  -6   0   -0.05    0.51
  -6   2   0  224.07    8.35
  -6   2   0  218.43    8.27
  -2  -6   0  239.69    8.43
   2   6   0  225.58    8.09
  -2  -6   0  226.65    8.09
  -3  -6   0    3.23    0.78
  -3  -6   0    3.72    0.41
  -6   3   0    4.02    0.73
  -6   3   0    2.99    0.59
  -4  -6   0   87.54    3.77
  -6   4   0   86.47    3.37
  -6   4   0   88.01    3.59
  -4  -6   0   85.61    3.22
  -5  -6   0   85.56    3.74
  -5  -6   0   79.06    3.06
  -6   5   0   82.98    3.18
  -6   5   0   79.19    3.44
  -6   6   0    4.40    0.86
  -6  -6   0    4.59    0.56
  -6  -6   0    3.56    1.08
  -6   6   0    4.10    0.60
  -7  -6   0   61.28    3.26
  -7  -6   0   63.15    2.55
  -6   7   0   62.43    2.93
  -7  -5   0   55.30    3.21
  -5   7   0   70.53    2.60
  -5   7   0   67.13    2.97
  -7  -5   0   64.75    2.69
  -4   7   0  274.38    9.73
  -4   7   0  277.84    9.50
  -7  -4   0  268.27    9.62
  -7  -4   0  235.97    9.99
  -7  -3   0   12.60    1.39
  -3   7   0   10.80    0.80
  -7  -3   0   10.65    0.97
  -3   7   0   10.96    0.92
  -2   7   0   25.28    1.27
  -7  -2   0   23.49    1.49
   2  -7   0   24.23    1.27
  -2   7   0   26.07    1.35
  -7  -2   0   22.94    1.74
  -7  -1   0   71.49    3.20
  -7  -1   0   72.99    3.03
  -1   7   0   72.08    2.86
   1  -7   0   71.09    2.89
   0  -7   0   -0.10    0.41
  -7   0   0    0.16    0.62
  -7   0   0   -0.81    0.63
   0  -7   0    0.74    0.52
   0   7   0    0.32    0.37
  -1  -7   0   74.87    3.04
  -7   1   0   75.96    3.09
   1   7   0   70.53    2.73
  -1  -7   0   72.48    2.76
  -7   1   0   62.43    2.98
  -7   2   0   23.15    1.47
  -2  -7   0   25.47    1.18
   2   7   0   25.02    1.15
  -7   2   0   27.22    1.66
  -2  -7   0   24.60    1.60
  -7   3   0   11.17    1.10
  -7   3   0   10.42    0.96
  -3  -7   0   13.06    1.23
  -3  -7   0   10.72    0.75
   3   7   0   10.88    0.70
  -7   4   0  263.25    9.68
  -4  -7   0  250.67    9.28
  -4  -7   0  265.08    9.84
  -7   4   0  264.87    9.48
  -7   5   0   65.57    2.69
  -5  -7   0   71.84    3.29
  -7   5   0   65.10    3.01
  -5  -7   0   61.27    2.51
  -7   6   0   63.98    2.62
  -6  -7   0   65.67    2.51
  -7   6   0   62.06    2.99
  -6  -7   0   61.27    3.27
  -7  -7   0    2.36    1.20
  -7   7   0    5.14    1.03
  -8  -7   0  193.45    7.88
  -7   8   0  185.78    7.39
  -8  -6   0   24.73    2.24
  -6   8   0   22.71    1.79
  -8  -5   0  174.21    6.61
  -8  -5   0  174.26    7.23
  -5   8   0  182.84    6.82
  -4   8   0   25.45    1.32
  -8  -4   0   26.41    1.62
  -4   8   0   26.53    1.64
  -8  -4   0   29.74    2.26
  -3   8   0   98.23    3.76
  -3   8   0   94.83    3.56
  -8  -3   0   91.15    3.78
  -8  -3   0   83.17    4.10
   2  -8   0   22.79    1.32
  -2   8   0   24.83    1.33
  -8  -2   0   27.11    1.93
  -8  -2   0   20.71    1.55
  -2   8   0   23.47    1.38
  -1   8   0    0.94    0.50
   1  -8   0    0.31    0.52
  -8  -1   0   -0.08    0.82
  -8  -1   0    0.87    0.73
  -8   0   0    1.98    0.88
   0   8   0    2.50    0.51
  -8   0   0    3.35    0.84
   0  -8   0    2.28    0.68
  -1  -8   0    1.09    0.69
  -8   1   0    1.50    0.79
   1   8   0    0.27    0.40
  -1  -8   0    1.11    0.45
  -8   1   0    0.44    0.72
  -8   2   0   23.97    1.67
   2   8   0   23.70    1.16
  -2  -8   0   24.70    1.67
  -2  -8   0   23.18    1.20
  -8   2   0   20.53    1.52
  -3  -8   0   92.19    4.01
  -8   3   0   91.33    3.77
   3   8   0   93.49    3.49
  -8   3   0   94.06    3.95
  -3  -8   0   92.76    3.50
  -4  -8   0   24.50    1.97
   4   8   0   23.79    1.16
  -4  -8   0   23.90    1.20
  -8   4   0   24.16    1.80
  -8   4   0   26.21    1.55
  -8   5   0  180.32    6.99
  -5  -8   0  181.69    7.21
  -8   5   0  176.49    6.68
  -8   6   0   27.58    2.04
  -6  -8   0   27.68    2.34
  -7  -8   0  192.64    7.74
  -8   7   0  180.67    7.31
  -8  -8   0    6.62    1.68
  -8   8   0    7.06    1.27
  -9  -8   0  250.97   10.20
  -8   9   0  251.84    9.68
  -9  -7   0    1.21    1.50
  -7   9   0    1.45    1.01
  -9  -6   0  138.06    6.24
  -6   9   0  144.39    5.74
  -5   9   0   34.41    2.08
  -9  -5   0   34.49    2.66
  -9  -5   0   35.41    1.98
  -9  -4   0   96.52    3.94
  -9  -4   0   87.40    4.37
  -4   9   0   95.89    3.94
  -3   9   0   14.18    1.18
  -9  -3   0   12.10    1.26
  -9  -3   0   14.62    1.70
  -2   9   0   25.53    1.49
   2  -9   0   24.99    1.45
  -9  -2   0   26.67    1.82
  -9  -2   0   20.27    1.96
  -2   9   0   23.93    1.43
   1  -9   0   12.72    1.09
  -9  -1   0   10.19    1.39
  -1   9   0   12.71    1.08
  -1   9   0   14.10    1.20
  -9  -1   0   13.16    1.31
   0  -9   0    1.00    0.69
  -9   0   0    0.08    0.90
   0   9   0   -0.17    0.48
  -9   0   0    1.45    0.85
  -1  -9   0   14.16    1.08
  -1  -9   0   14.13    1.29
  -9   1   0   17.46    1.53
  -9   1   0   15.31    1.41
   1   9   0   13.21    1.00
  -9   2   0   27.32    1.95
  -2  -9   0   24.69    1.34
  -9   2   0   25.20    1.75
  -2  -9   0   24.28    1.81
   2   9   0   24.02    1.28
  -3  -9   0   13.38    0.97
  -3  -9   0   11.16    1.35
   3   9   0   11.41    0.88
  -9   3   0   11.43    1.29
  -9   3   0   13.52    1.26
  -9   4   0  100.35    4.29
  -4  -9   0   96.81    4.41
  -9   4   0   96.29    4.00
  -5  -9   0   34.07    2.50
  -9   5   0   35.10    2.33
  -9   5   0   33.55    1.95
  -6  -9   0  151.66    6.26
  -9   6   0  136.71    5.91
  -9   7   0    1.68    1.13
  -7  -9   0    0.80    1.34
  -9   8   0  258.66   10.01
  -8  -9   0  260.48   10.46
  -9  -9   0    1.53    1.69
  -9   9   0    0.49    1.23
  -9  10   0  138.57    6.03
 -10  -9   0  140.74    6.79
 -10  -8   0    5.72    1.93
  -8  10   0    6.32    1.38
 -10  -7   0   88.49    4.83
  -7  10   0   85.15    4.05
  -6  10   0    8.16    1.22
 -10  -6   0    5.05    1.71
  -5  10   0  108.86    4.62
 -10  -5   0  110.35    5.27
 -10  -4   0    9.95    1.22
  -4  10   0    8.08    1.11
 -10  -4   0   12.90    1.83
 -10  -3   0   97.30    4.45
 -10  -3   0  107.03    4.96
  -3  10   0  114.16    4.38
  -2  10   0   25.05    1.55
 -10  -2   0   25.07    2.28
 -10  -2   0   19.61    1.67
  -1  10   0    2.77    0.80
   1 -10   0    1.14    0.73
 -10  -1   0    1.30    0.99
  -1  10   0    0.88    0.63
 -10  -1   0    2.29    1.17
   0  10   0    9.71    0.92
 -10   0   0   11.22    1.45
   0 -10   0   10.52    1.12
 -10   0   0    9.85    1.28
 -10   1   0    0.91    1.00
 -10   1   0    0.94    1.02
  -1 -10   0    2.08    0.88
   1  10   0    1.95    0.59
  -2 -10   0   22.14    1.37
   2  10   0   23.16    1.29
 -10   2   0   20.84    1.87
 -10   2   0   21.52    1.81
  -2 -10   0   23.79    1.86
 -10   3   0  113.18    4.73
  -3 -10   0  108.87    4.86
 -10   3   0  119.11    4.93
 -10   4   0    9.71    1.16
  -4 -10   0    8.88    1.46
 -10   4   0    8.09    1.36
  -5 -10   0  109.08    5.01
 -10   5   0  106.44    4.78
 -10   6   0    7.53    1.47
  -6 -10   0    8.18    1.64
 -10   7   0   87.89    4.32
  -7 -10   0   93.08    4.79
 -10   8   0    6.35    1.51
  -8 -10   0    4.53    1.85
  -9 -10   0  138.66    6.72
 -10   9   0  142.80    6.16
 -10  10   0    0.89    1.41
 -10 -10   0    3.79    2.08
 -11 -10   0   53.44    4.30
 -10  11   0   53.64    3.59
 -11  -9   0   -1.14    1.83
  -9  11   0   -0.97    1.27
 -11  -8   0  100.57    5.58
  -8  11   0  103.06    4.79
  -7  11   0    1.60    1.12
 -11  -7   0    2.06    1.86
 -11  -6   0   68.14    4.23
  -6  11   0   62.43    3.30
  -5  11   0    0.56    0.94
 -11  -5   0    2.60    1.56
 -11  -4   0   51.66    3.13
 -11  -4   0   50.57    3.41
  -4  11   0   52.92    2.69
 -11  -3   0    2.58    1.44
  -3  11   0   -0.42    0.73
 -11  -3   0    0.54    0.98
 -11  -2   0    8.37    1.32
  -2  11   0    9.84    1.09
 -11  -2   0    8.78    1.62
  -1  11   0    1.06    0.69
 -11  -1   0    3.43    1.33
 -11  -1   0    0.83    1.07
 -11   0   0    1.49    1.15
   0  11   0   -0.08    0.60
   0 -11   0    0.32    0.80
 -11   0   0   -0.06    1.05
 -11   1   0    4.33    1.24
  -1 -11   0    1.35    0.94
   1  11   0    1.39    1.06
 -11   1   0    2.25    1.15
  -2 -11   0    8.22    1.30
 -11   2   0    5.73    1.35
 -11   2   0    7.65    1.35
  -3 -11   0    1.66    1.08
 -11   3   0    1.26    0.99
 -11   3   0    2.74    1.24
 -11   4   0   49.06    3.13
  -4 -11   0   57.50    3.19
 -11   5   0   -0.42    1.20
  -5 -11   0    1.37    1.38
 -11   6   0   62.57    3.51
  -6 -11   0   58.06    3.73
 -11   7   0   -0.35    1.32
  -7 -11   0    3.12    1.66
  -8 -11   0  101.16    5.46
 -11   8   0  103.69    4.97
 -11   9   0    0.56    1.48
  -9 -11   0   -0.25    1.88
 -10 -11   0   48.48    4.28
 -11  10   0   51.12    3.49
 -11 -11   0    3.07    2.37
 -11  11   0    2.18    1.67
 -12 -11   0   65.14    5.35
 -11  12   0   66.39    4.19
 -12 -10   0    1.29    2.41
 -10  12   0   -0.25    1.50
 -12  -9   0  121.16    6.75
  -9  12   0  142.77    6.08
 -12  -8   0    7.61    2.30
  -8  12   0    7.60    1.59
  -7  12   0   70.86    3.79
 -12  -7   0   82.45    4.97
  -6  12   0    3.67    1.24
 -12  -6   0    7.54    2.11
 -12  -5   0   69.52    4.32
  -5  12   0   64.60    3.36
 -12  -4   0   14.97    2.24
  -4  12   0   14.77    1.50
 -12  -3   0   47.30    2.79
  -3  12   0   42.76    2.49
 -12  -3   0   48.16    3.45
  -2  12   0   14.04    1.36
 -12  -2   0   19.09    1.81
 -12  -2   0   17.92    2.13
  -1  12   0   -0.03    0.75
 -12  -1   0    4.01    1.34
 -12   0   0   15.73    1.93
 -12   0   0   13.79    1.73
 -12   1   0    3.60    1.34
 -12   1   0    4.87    1.34
  -1 -12   0    1.32    1.09
 -12   2   0   19.80    1.99
 -12   2   0   17.70    1.80
  -2 -12   0   15.89    1.75
 -12   3   0   48.48    2.90
 -12   3   0   49.42    3.28
  -3 -12   0   47.16    2.98
  -4 -12   0   13.71    1.89
 -12   4   0   13.85    1.91
 -12   5   0   71.07    3.86
  -5 -12   0   59.91    3.87
  -6 -12   0    2.97    1.69
 -12   6   0    2.90    1.55
  -7 -12   0   83.02    4.83
 -12   7   0   77.10    4.35
 -12   8   0    8.84    1.89
  -8 -12   0   10.30    2.31
  -9 -12   0  149.72    7.33
 -12   9   0  141.16    6.62
 -12  10   0   -0.43    1.66
 -10 -12   0    0.73    2.25
 -12  11   0   63.96    4.22
 -11 -12   0   59.58    5.14
 -10  13   0   57.14    3.81
 -13  -9   0    6.78    2.59
  -9  13   0    2.63    1.58
  -8  13   0   82.73    4.30
 -13  -8   0   81.32    5.49
  -7  13   0    1.60    1.35
 -13  -7   0    2.50    2.22
 -13  -6   0   77.48    4.97
  -6  13   0   73.44    3.86
 -13  -5   0   28.78    3.18
  -5  13   0   32.74    2.35
  -4  13   0   90.25    4.27
 -13  -4   0   99.63    5.25
 -13  -3   0    8.26    1.97
  -3  13   0   10.24    1.36
 -13  -2   0   34.34    3.19
  -2  13   0   35.53    2.31
 -13  -2   0   36.92    2.87
 -13  -1   0   19.69    2.05
 -13  -1   0   24.96    2.42
 -13   0   0    2.86    1.54
 -13   0   0    3.66    1.54
 -13   1   0   23.86    2.32
 -13   1   0   27.34    2.44
 -13   2   0   44.18    3.21
 -13   2   0   36.26    2.89
 -13   3   0    8.24    1.83
  -3 -13   0    8.14    1.63
  -4 -13   0   84.75    4.48
 -13   4   0   85.94    4.66
 -13   5   0   32.37    2.83
  -5 -13   0   31.74    2.90
  -6 -13   0   75.11    4.56
 -13   6   0   76.82    4.43
  -7 -13   0    3.82    2.00
 -13   7   0    2.03    1.77
  -8 -13   0   91.69    5.63
 -13   8   0   93.48    5.11
  -9 -13   0    3.87    2.41
 -13   9   0    4.43    1.97
 -13  10   0   62.35    5.89
 -10 -13   0   64.30    5.09
 -14  -8   0    1.69    2.47
  -8  14   0    5.12    1.65
  -7  14   0   61.67    3.72
 -14  -7   0   65.66    4.98
  -6  14   0    0.82    1.34
 -14  -6   0    2.32    2.24
  -5  14   0   32.10    2.59
 -14  -5   0   31.31    3.48
 -14  -4   0   27.49    3.06
  -4  14   0   20.77    1.98
 -14  -3   0   29.88    3.01
 -14  -2   0   25.20    2.81
 -14  -1   0    3.60    1.57
 -14  -1   0    3.57    1.81
 -14   0   0   17.49    2.25
 -14   0   0   15.41    2.20
 -14   1   0    2.03    1.60
 -14   1   0    2.66    1.58
 -14   2   0   25.79    2.59
 -14   3   0   25.06    2.62
 -14   4   0   23.17    2.56
 -14   5   0   31.06    3.02
  -5 -14   0   30.51    2.91
  -6 -14   0    2.86    1.93
 -14   6   0    0.41    1.79
 -14   7   0   48.51    4.17
  -7 -14   0   62.85    4.42
 -14   8   0    1.61    1.98
  -8 -14   0    3.96    2.37
 -15  -6   0   12.24    2.89
  -6  15   0   14.27    1.97
 -15  -5   0   23.55    3.34
 -15  -4   0   13.76    2.86
 -15  -3   0    4.90    2.25
 -15  -2   0    0.79    1.87
 -15  -1   0   31.09    3.09
 -15   0   0    1.53    1.73
 -15   0   0    3.13    1.80
 -15   1   0   29.44    2.89
 -15   2   0    4.58    1.99
 -15   3   0    5.47    2.04
 -15   4   0   10.00    2.24
 -15   5   0   22.22    2.79
 -15   6   0    9.95    2.44
 -16  -3   0   17.31    3.03
 -16  -2   0   38.54    3.70
 -16  -1   0    0.39    1.96
 -16   1   0    2.20    2.00
 -16   2   0   36.61    3.45
 -16   3   0   14.34    2.66
   0   0  -1    0.00    0.01
   0   0  -1    0.00    0.01
   0   0   1    0.01    0.01
   0   0   1   -0.01    0.01
   0   1  -1   -0.07    0.08
   1   0  -1   -0.04    0.07
   0   1  -1   -0.06    0.05
  -1   0  -1   -0.06    0.04
   0  -1  -1    0.00    0.05
  -1   0  -1   -0.01    0.05
   0   1   1   -0.04    0.04
   1   0   1   -0.03    0.04
   0   1   1   -0.05    0.02
  -1   0   1    0.01    0.06
   0  -1   1   -0.05    0.05
   0  -1   1    0.02    0.08
  -1   0   1   -0.01    0.04
  -1  -1  -1   -0.03    0.09
  -1   1  -1   -0.03    0.06
   1   1  -1    0.26    0.11
  -1   1  -1   -0.01    0.06
   1  -1   1   -0.08    0.06
  -1   1   1    0.05    0.07
  -1  -1   1   -0.01    0.09
   1  -1   1    0.55    0.16
  -1  -1   1    0.08    0.09
  -1   2  -1  223.77    7.89
  -2  -1  -1  214.02    7.84
  -1   2  -1  229.78    7.89
  -2  -1  -1  222.26    7.96
   1  -2   1  212.28    7.46
  -2  -1   1  200.31    7.53
  -1   2   1  221.56    7.46
   1  -2   1  215.50    7.46
   2   1   1  194.27    7.40
  -2  -1   1  202.69    7.45
  -1   2   1  223.95    7.39
  -2   0  -1  138.62    5.40
  -2   0  -1  144.28    5.35
   0  -2  -1  152.92    5.34
   0  -2  -1  164.93    5.36
   0   2   1  144.07    5.70
   0  -2   1  159.30    5.72
   0  -2   1  166.74    5.79
   0   2   1  175.85    5.73
  -2   0   1  153.04    5.76
   0   2   1  169.63    5.74
   2  -1  -1  210.31    7.53
  -2   1  -1  207.54    7.56
  -1  -2  -1  215.43    7.60
  -2   1  -1  217.64    7.58
  -1  -2   1  228.01    8.13
   1   2   1  231.38    7.97
  -1  -2   1  225.38    8.01
  -2   1   1  226.93    8.03
  -2   1   1  224.28    8.08
  -2  -2  -1    9.34    0.73
   2  -2  -1   11.80    0.53
  -2  -2  -1   10.47    0.50
  -2   2  -1   12.39    0.63
  -2  -2   1   10.83    0.58
  -2   2   1   11.78    0.68
  -2  -2   1   11.86    0.80
   2   2   1    9.38    0.50
  -2   2   1   12.21    0.52
  -2   3  -1   38.27    1.61
  -3  -2  -1   38.38    1.53
   2  -3  -1   39.86    1.48
  -2   3  -1   40.47    1.57
  -3  -2  -1   38.70    1.76
  -2   3   1   52.37    1.88
  -3  -2   1   45.51    2.13
  -2   3   1   50.15    2.01
  -2   3   1   53.95    1.88
  -3  -2   1   50.63    1.97
   1  -3  -1  181.29    6.19
  -3  -1  -1  161.08    6.34
  -3  -1  -1  167.98    6.22
  -1   3  -1  184.97    6.27
  -1   3  -1  175.10    6.24
   1  -3   1  179.04    6.59
  -1   3   1  186.83    6.58
  -3  -1   1  177.70    6.61
  -3  -1   1  171.12    6.68
   1  -3   1  183.90    6.60
  -1   3   1  204.61    6.54
  -3   0  -1   59.58    2.30
   0  -3  -1   62.31    2.29
  -3   0  -1   53.93    2.36
   0  -3  -1   61.97    2.23
   0   3  -1   63.79    2.25
   0   3   1   62.13    2.27
   0  -3   1   60.60    2.30
  -3   0   1   61.17    2.40
  -3   0   1   58.71    2.37
   0  -3   1   65.67    2.40
  -1  -3  -1  174.43    6.29
  -3   1  -1  185.56    6.43
  -3   1  -1  167.96    6.42
  -1  -3  -1  185.31    6.45
  -1  -3   1  173.92    6.20
  -3   1   1  174.39    6.31
  -3   1   1  164.77    6.25
  -1  -3   1  185.86    6.37
   1   3   1  174.21    6.16
  -2  -3  -1   49.85    2.09
  -2  -3  -1   50.25    1.82
  -3   2  -1   51.50    2.00
  -3   2  -1   48.41    2.01
   2   3   1   37.12    1.41
  -2  -3   1   38.79    1.47
  -2  -3   1   34.49    1.69
  -3   2   1   40.56    1.64
  -3   2   1   39.38    1.50
  -3   3  -1   27.20    1.17
  -3  -3  -1   24.98    1.03
  -3   3  -1   25.31    1.24
  -3  -3  -1   25.05    1.38
  -3   3   1   27.55    1.07
  -3  -3   1   22.51    1.35
  -3  -3   1   25.04    1.10
  -3   3   1   27.28    1.27
  -4  -3  -1   68.68    2.54
  -4  -3  -1   65.32    2.84
  -3   4  -1   67.76    2.58
  -3   4  -1   66.43    2.68
  -4  -3   1   84.82    3.56
  -3   4   1   90.92    3.20
  -3   4   1   85.70    3.38
  -4  -3   1   88.35    3.29
  -2   4  -1  153.99    5.62
  -2   4  -1  155.74    5.57
  -4  -2  -1  155.05    5.56
  -4  -2  -1  149.71    5.77
  -4  -2   1  175.00    6.27
  -2   4   1  176.50    6.28
  -2   4   1  180.29    6.16
  -4  -2   1  158.00    6.41
  -1   4  -1  169.00    6.18
  -1   4  -1  178.91    6.22
   1  -4  -1  172.65    6.15
  -4  -1  -1  167.58    6.34
  -4  -1  -1  168.33    6.19
  -1   4   1  151.73    5.33
  -4  -1   1  130.72    5.45
   1  -4   1  151.40    5.34
  -4  -1   1  144.79    5.38
   1  -4   1  155.39    5.37
   0  -4  -1  322.28   10.88
  -4   0  -1  274.91   10.93
   0   4  -1  313.32   10.82
  -4   0  -1  297.57   10.87
   0  -4  -1  317.38   10.80
   0  -4   1  309.95   10.78
   0   4   1  312.00   10.76
  -4   0   1  309.34   10.87
   0  -4   1  318.97   10.89
  -4   0   1  270.37   10.88
  -1  -4  -1  156.00    5.58
  -4   1  -1  155.08    5.57
  -1  -4  -1  144.76    5.38
  -4   1  -1  149.66    5.55
  -4   1   1  163.80    6.09
  -1  -4   1  169.10    5.96
   1   4   1  165.75    5.91
  -1  -4   1  174.61    6.15
  -4   1   1  158.94    6.04
  -4   2  -1  183.20    6.47
  -2  -4  -1  168.54    6.28
  -4   2  -1  178.57    6.50
  -2  -4  -1  180.32    6.56
  -4   2   1  152.72    5.54
  -2  -4   1  149.73    5.71
  -4   2   1  154.86    5.65
  -2  -4   1  153.55    5.47
  -3  -4  -1   86.16    3.14
  -4   3  -1   89.96    3.32
  -4   3  -1   82.26    3.38
  -3  -4  -1   89.73    3.53
  -4   3   1   67.60    2.67
  -3  -4   1   65.66    2.46
  -4   3   1   67.34    2.49
  -3  -4   1   60.85    2.76
  -4   4  -1  254.96    8.64
  -4   4  -1  238.03    8.73
  -4  -4  -1  227.11    8.88
  -4  -4  -1  238.01    8.50
  -4   4   1  250.79    8.38
  -4  -4   1  236.51    8.40
  -4   4   1  242.09    8.59
  -4  -4   1  209.42    8.69
  -4   5  -1  262.26    9.68
  -4   5  -1  271.35    9.53
  -5  -4  -1  263.52    9.47
  -5  -4  -1  265.41    9.89
  -4   5   1  308.56   10.52
  -5  -4   1  289.74   10.97
  -5  -4   1  294.95   10.60
  -4   5   1  292.42   10.75
  -3   5  -1  239.88    8.34
  -3   5  -1  239.32    8.46
  -5  -3  -1  209.76    8.62
  -5  -3  -1  238.78    8.35
  -3   5   1  189.90    7.04
  -5  -3   1  185.11    7.25
  -3   5   1  197.12    6.85
  -5  -3   1  194.24    6.98
   2  -5  -1  142.30    5.09
  -2   5  -1  142.20    5.16
  -5  -2  -1  144.17    5.43
  -5  -2  -1  131.89    5.17
  -2   5  -1  142.90    5.21
   2  -5   1  133.69    4.84
  -2   5   1  133.21    4.76
  -5  -2   1  130.91    4.90
  -5  -2   1  120.36    5.06
  -2   5   1  137.39    4.89
  -5  -1  -1  189.43    7.82
  -1   5  -1  215.33    7.66
   1  -5  -1  221.44    7.64
  -5  -1  -1  211.61    7.69
  -1   5  -1  223.63    7.72
  -5  -1   1  224.13    8.13
  -1   5   1  229.27    8.04
   1  -5   1  226.47    8.06
   1  -5   1  226.55    8.09
  -5  -1   1  212.65    8.22
   0  -5  -1  140.59    4.97
  -5   0  -1  132.46    5.07
   0   5  -1  135.95    4.88
  -5   0  -1  121.93    4.96
   0  -5  -1  138.11    4.87
   0   5   1  137.45    4.86
   0  -5   1  137.78    4.88
  -5   0   1  123.38    5.02
   0  -5   1  141.58    5.02
  -5   0   1  127.76    5.00
   1   5  -1  223.20    8.01
  -1  -5  -1  228.28    7.99
  -5   1  -1  227.22    8.17
  -1  -5  -1  231.94    8.19
  -5   1  -1  212.18    8.18
  -1  -5   1  226.68    7.91
  -5   1   1  217.22    7.86
   1   5   1  217.86    7.65
  -5   1   1  199.56    7.80
  -1  -5   1  214.22    7.68
  -5   2  -1  137.48    5.01
  -2  -5  -1  128.75    4.74
  -5   2  -1  129.10    4.95
  -2  -5  -1  134.89    5.06
   2   5   1  133.00    5.01
  -2  -5   1  141.55    5.07
  -5   2   1  139.60    5.19
  -5   2   1  146.20    5.30
  -2  -5   1  143.09    5.36
  -3  -5  -1  181.14    6.75
  -5   3  -1  194.80    6.97
  -3  -5  -1  194.29    7.17
  -5   3  -1  192.88    7.06
  -5   3   1  236.68    8.60
  -3  -5   1  232.73    8.71
  -3  -5   1  236.05    8.37
  -5   3   1  233.76    8.44
  -5   4  -1  304.70   10.48
  -4  -5  -1  279.45   10.74
  -4  -5  -1  283.49   10.30
  -5   4  -1  298.26   10.61
  -5   4   1  261.23    9.57
  -5   4   1  265.89    9.35
  -4  -5   1  264.88    9.33
  -4  -5   1  254.10    9.73
  -5  -5  -1  251.44    9.35
  -5   5  -1  243.57    9.10
  -5  -5  -1  241.69    8.80
  -5   5  -1  253.01    8.94
  -5  -5   1  226.69    8.86
  -5   5   1  243.36    8.39
  -5  -5   1  239.99    8.42
  -5   5   1  225.89    8.63
  -6  -5  -1   69.76    3.35
  -5   6  -1   71.35    2.76
  -5   6  -1   67.01    2.99
  -6  -5  -1   67.95    2.68
  -6  -5   1   59.17    2.44
  -5   6   1   63.17    2.32
  -6  -5   1   54.98    2.98
  -5   6   1   59.14    2.68
  -6  -4  -1  124.97    5.39
  -4   6  -1  138.80    4.98
  -4   6  -1  135.16    5.16
  -6  -4  -1  136.29    4.98
  -6  -4   1  145.29    5.49
  -6  -4   1  145.04    5.90
  -4   6   1  141.93    5.60
  -4   6   1  156.38    5.34
  -3   6  -1   54.80    2.41
  -6  -3  -1   55.31    2.36
  -3   6  -1   57.32    2.28
  -6  -3  -1   59.30    2.76
  -3   6   1   66.74    2.47
  -6  -3   1   60.28    2.95
  -6  -3   1   64.26    2.68
  -3   6   1   66.05    2.68
  -6  -2  -1   86.34    3.93
  -6  -2  -1   96.25    3.71
   2  -6  -1   98.41    3.59
  -2   6  -1   99.49    3.67
  -2   6  -1   96.69    3.69
  -6  -2   1   96.16    3.83
  -2   6   1  101.41    3.78
   2  -6   1   96.52    3.74
  -6  -2   1  100.64    4.06
  -2   6   1   96.30    3.66
  -1   6  -1  116.60    4.28
  -6  -1  -1  108.29    4.27
  -1   6  -1  108.12    4.18
  -6  -1  -1  112.77    4.46
   1  -6  -1  112.64    4.19
   1  -6   1  112.07    4.12
  -6  -1   1  109.95    4.23
  -1   6   1  112.60    4.10
   1  -6   1  113.03    4.18
  -6  -1   1   97.29    4.32
  -6   0  -1  100.75    3.88
  -6   0  -1   90.09    3.93
   0   6  -1  100.99    3.71
   0  -6  -1  103.60    3.83
  -6   0   1   87.40    3.85
   0  -6   1  100.60    3.67
  -6   0   1   96.20    3.84
   0  -6   1  100.94    3.82
   0   6   1  101.01    3.64
  -6   1  -1  110.07    4.39
   1   6  -1  114.45    4.18
  -1  -6  -1  111.33    4.15
  -6   1  -1  115.66    4.39
  -1  -6  -1  115.01    4.39
  -6   1   1   99.75    4.20
  -1  -6   1  110.36    4.04
  -1  -6   1  111.13    4.29
   1   6   1  110.10    4.00
  -6   1   1  115.85    4.29
  -2  -6  -1   93.40    3.49
  -6   2  -1   97.24    3.82
  -6   2  -1   93.50    3.76
  -2  -6  -1   98.42    3.85
  -2  -6   1   96.03    3.55
  -2  -6   1   92.88    3.87
  -6   2   1  100.23    3.85
  -6   2   1   95.14    3.72
   2   6   1   94.96    3.50
  -6   3  -1   66.12    2.83
  -3  -6  -1   67.10    2.94
  -3  -6  -1   62.20    2.43
  -6   3  -1   67.33    2.72
  -3  -6   1   54.94    2.18
  -6   3   1   54.82    2.32
  -3  -6   1   58.29    2.64
  -6   3   1   57.63    2.54
  -4  -6  -1  133.31    5.12
  -6   4  -1  146.26    5.37
  -6   4  -1  147.17    5.54
  -4  -6  -1  147.38    5.70
  -4  -6   1  125.47    5.16
  -6   4   1  126.96    4.76
  -4  -6   1  130.58    4.70
  -6   4   1  130.15    5.02
  -6   5  -1   58.35    2.68
  -6   5  -1   62.43    2.46
  -5  -6  -1   57.61    2.93
  -5  -6  -1   54.31    2.21
  -5  -6   1   68.99    2.64
  -6   5   1   64.12    2.95
  -6   5   1   68.37    2.65
  -5  -6   1   68.30    3.25
  -6  -6  -1   27.51    2.06
  -6   6  -1   23.95    1.68
  -6  -6  -1   23.93    1.19
  -6   6  -1   25.71    1.37
  -6  -6   1   24.34    1.27
  -6   6   1   24.39    1.17
  -6  -6   1   21.78    1.89
  -6   6   1   24.58    1.66
  -7  -6  -1   88.02    4.22
  -6   7  -1   95.12    3.59
  -6   7  -1   93.05    3.91
  -7  -6  -1   87.80    3.46
  -6   7   1   78.80    3.52
  -7  -6   1   82.11    3.95
  -7  -6   1   80.61    3.20
  -5   7  -1   97.55    3.65
  -7  -5  -1   92.48    3.64
  -5   7  -1   90.99    3.90
  -7  -5  -1   97.11    4.34
  -7  -5   1  106.11    4.74
  -5   7   1  111.42    4.02
  -7  -5   1  107.03    4.18
  -5   7   1  106.64    4.38
  -4   7  -1  142.49    5.42
  -7  -4  -1  129.34    5.70
  -7  -4  -1  142.23    5.28
  -4   7  -1  145.26    5.21
  -7  -4   1  149.77    5.65
  -7  -4   1  138.43    6.03
  -4   7   1  158.67    5.44
  -4   7   1  149.48    5.74
  -3   7  -1  103.06    3.85
  -3   7  -1  105.09    3.99
  -7  -3  -1   96.69    3.94
  -7  -3  -1   98.14    4.29
  -3   7   1  117.93    4.48
  -3   7   1  117.47    4.27
  -7  -3   1  110.29    4.81
  -7  -3   1  115.87    4.49
  -7  -2  -1  102.50    4.35
  -2   7  -1  104.47    4.03
  -7  -2  -1  103.17    4.07
   2  -7  -1  104.26    3.91
  -2   7  -1  104.02    3.98
   2  -7   1  103.37    3.99
  -7  -2   1  103.13    4.35
  -2   7   1  108.46    4.02
  -7  -2   1   98.31    4.09
  -2   7   1  105.08    3.92
  -7  -1  -1   90.15    3.83
   1  -7  -1   88.36    3.51
  -1   7  -1   96.57    3.62
  -1   7  -1   90.98    3.51
  -7  -1  -1   86.65    3.63
   1  -7   1   93.28    3.62
  -7  -1   1   86.60    3.69
  -7  -1   1   93.30    3.86
   1  -7   1   91.93    3.56
  -1   7   1   92.16    3.52
  -7   0  -1  165.14    6.30
   0  -7  -1  168.20    6.25
   0   7  -1  169.21    6.13
  -7   0  -1  166.55    6.41
   0  -7   1  174.07    6.37
  -7   0   1  169.86    6.48
   0   7   1  170.38    6.18
  -7   0   1  166.67    6.41
   0  -7   1  165.84    6.20
  -7   1  -1   89.20    3.75
  -1  -7  -1   94.99    3.50
   1   7  -1   92.92    3.50
  -1  -7  -1   95.44    3.76
  -7   1  -1   90.61    3.79
   1   7   1   92.28    3.40
  -1  -7   1   94.03    3.71
  -1  -7   1   89.07    3.43
  -7   1   1   81.70    3.64
  -7   1   1   96.36    3.75
  -2  -7  -1  105.58    3.95
   2   7  -1  109.09    3.99
  -7   2  -1  109.04    4.30
  -7   2  -1  101.96    4.23
  -2  -7  -1  110.64    4.32
  -7   2   1  106.11    4.20
  -2  -7   1  104.59    3.86
  -7   2   1  102.95    4.07
   2   7   1  104.04    3.81
  -2  -7   1   99.10    4.21
  -3  -7  -1  118.19    4.77
  -7   3  -1  119.47    4.70
  -7   3  -1  117.62    4.58
  -3  -7  -1  116.77    4.29
   3   7   1  101.92    3.70
  -3  -7   1   98.77    3.75
  -3  -7   1  104.60    4.24
  -7   3   1  100.74    4.11
  -7   3   1   98.24    3.92
  -4  -7  -1  141.62    5.34
  -4  -7  -1  151.52    5.96
  -7   4  -1  154.43    5.81
  -7   4  -1  148.62    5.62
  -4  -7   1  137.70    5.12
  -7   4   1  142.08    5.52
  -4  -7   1  141.75    5.68
  -7   4   1  140.01    5.26
  -7   5  -1  110.59    4.44
  -5  -7  -1  104.54    4.62
  -7   5  -1  110.88    4.19
  -5  -7  -1  104.61    3.93
  -7   5   1   88.80    3.49
  -5  -7   1   91.07    3.42
  -5  -7   1   91.20    4.08
  -7   5   1   90.51    3.85
  -6  -7  -1   82.94    3.99
  -7   6  -1   81.75    3.33
  -7   6  -1   84.71    3.64
  -6  -7   1   83.64    4.00
  -6  -7   1   85.31    3.30
  -7   6   1   88.79    3.75
  -7  -7  -1   84.65    4.14
  -7   7  -1   81.17    3.69
  -7  -7   1   74.24    3.76
  -7   7   1   73.71    3.41
  -8  -7  -1   18.54    2.07
  -7   8  -1   24.13    1.91
  -7   8   1   29.80    2.09
  -8  -7   1   29.04    2.53
  -8  -6  -1   72.27    3.85
  -6   8  -1   73.24    3.35
  -8  -6   1   86.06    4.06
  -6   8   1   74.06    3.44
  -8  -6   1   73.08    3.15
  -8  -5  -1   72.49    3.72
  -5   8  -1   78.19    3.34
  -8  -5  -1   72.48    3.06
  -8  -5   1   71.06    3.66
  -5   8   1   71.56    3.20
  -8  -5   1   70.58    3.05
  -8  -4  -1  153.00    5.85
  -8  -4  -1  145.77    6.31
  -4   8  -1  162.38    5.97
  -4   8  -1  155.53    5.72
  -8  -4   1  153.40    5.70
  -8  -4   1  137.38    6.08
  -4   8   1  152.16    5.73
  -3   8  -1  177.46    6.47
  -8  -3  -1  165.04    6.83
  -3   8  -1  179.19    6.35
  -8  -3  -1  161.62    6.44
  -3   8   1  180.97    6.71
  -8  -3   1  182.12    6.76
  -3   8   1  183.91    6.50
  -8  -3   1  165.25    7.05
  -8  -2  -1  101.21    4.63
  -8  -2  -1  106.74    4.34
  -2   8  -1  111.87    4.25
  -2   8  -1  115.57    4.29
   2  -8  -1  109.92    4.17
  -8  -2   1  106.12    4.38
  -2   8   1  112.78    4.16
   2  -8   1  102.93    4.20
  -2   8   1  108.60    4.22
  -8  -2   1  112.99    4.67
  -1   8  -1  223.17    7.93
  -8  -1  -1  200.74    8.14
  -8  -1  -1  211.64    7.96
  -1   8  -1  221.31    7.83
   1  -8  -1  208.34    7.82
  -1   8   1  218.20    8.05
  -8  -1   1  230.59    8.43
  -8  -1   1  217.55    8.26
   1  -8   1  216.57    8.13
  -8   0  -1  248.33    9.47
   0  -8  -1  259.94    9.30
   0   8  -1  256.89    9.16
  -8   0  -1  246.10    9.35
  -8   0   1  271.73    9.75
   0   8   1  260.08    9.39
   0  -8   1  255.93    9.42
  -8   0   1  256.86    9.64
   0  -8   1  257.53    9.59
  -8   1  -1  208.88    8.16
   1   8  -1  218.37    7.90
  -1  -8  -1  219.40    8.15
  -8   1  -1  224.40    8.23
  -8   1   1  213.67    8.08
  -1  -8   1  217.56    7.78
  -1  -8   1  220.10    8.06
  -8   1   1  201.12    8.02
   1   8   1  217.20    7.74
  -2  -8  -1  110.21    4.02
  -8   2  -1  100.22    4.32
  -2  -8  -1  109.26    4.42
   2   8  -1  108.17    4.05
  -8   2  -1  110.19    4.43
  -2  -8   1  111.85    4.23
  -2  -8   1  112.77    4.62
   2   8   1  112.50    4.18
  -8   2   1  113.33    4.61
  -8   2   1  114.82    4.51
   3   8  -1  181.62    6.71
  -8   3  -1  189.38    7.11
  -3  -8  -1  185.54    7.17
  -8   3  -1  185.36    6.99
  -3  -8  -1  184.20    6.67
  -3  -8   1  178.41    6.84
  -8   3   1  172.68    6.55
  -8   3   1  176.01    6.73
   3   8   1  170.61    6.27
  -3  -8   1  172.76    6.33
  -8   4  -1  151.03    5.77
  -4  -8  -1  148.53    6.08
  -4  -8  -1  149.24    5.46
  -8   4  -1  155.40    5.98
   4   8   1  151.21    5.46
  -4  -8   1  147.99    5.53
  -8   4   1  150.21    5.71
  -8   4   1  156.92    6.00
  -4  -8   1  150.05    6.12
  -5  -8  -1   71.60    3.59
  -8   5  -1   75.42    3.11
  -8   5  -1   71.88    3.37
  -5  -8   1   81.98    3.78
  -8   5   1   80.05    3.53
  -5  -8   1   75.48    2.99
  -8   5   1   74.74    3.13
  -6  -8  -1   74.91    3.80
  -8   6  -1   74.00    3.49
  -6  -8   1   69.71    3.63
  -8   6   1   69.48    3.32
  -8   7  -1   33.62    2.25
  -7  -8  -1   31.61    2.59
  -8   7   1   19.85    1.75
  -7  -8   1   22.04    2.18
  -8  -8  -1   12.24    1.86
  -8   8  -1   11.29    1.46
  -8   8   1   14.85    1.57
  -8  -8   1   15.84    2.06
  -8   9  -1    6.90    1.32
  -8   9   1    6.68    1.30
  -9  -8   1   11.78    1.99
  -7   9  -1   33.34    2.35
  -9  -7  -1   39.37    3.12
  -7   9   1   30.67    2.20
  -9  -7   1   29.96    2.77
  -6   9  -1   39.76    2.35
  -9  -6  -1   37.29    2.87
  -6   9   1   43.15    2.50
  -9  -6   1   47.87    3.21
  -9  -5  -1   53.32    2.66
  -9  -5  -1   58.39    3.38
  -5   9  -1   53.30    2.72
  -9  -5   1   55.88    3.46
  -5   9   1   64.88    3.00
  -9  -5   1   67.68    2.92
  -9  -4  -1  120.32    4.79
  -9  -4  -1  115.79    5.33
  -4   9  -1  125.04    4.86
  -9  -4   1  114.26    4.65
  -4   9   1  120.70    4.63
  -9  -4   1  106.23    5.06
  -3   9  -1  155.09    5.96
  -9  -3  -1  142.36    5.97
  -9  -3  -1  169.63    6.50
  -3   9  -1  154.67    5.82
  -9  -3   1  165.22    6.88
  -3   9   1  178.76    6.46
  -9  -3   1  162.12    6.50
  -2   9  -1  113.71    4.31
   2  -9  -1  106.90    4.22
  -9  -2  -1  107.69    4.80
  -9  -2  -1  104.36    4.45
  -2   9  -1  112.38    4.33
  -2   9   1  103.77    4.10
  -9  -2   1  104.13    4.61
   2  -9   1  101.37    4.09
  -2   9   1  105.50    4.03
  -9  -2   1  100.74    4.30
  -9  -1  -1  131.31    5.26
  -1   9  -1  137.47    5.19
  -1   9  -1  134.19    5.07
  -9  -1  -1  124.26    5.46
   1  -9  -1  132.18    5.08
  -9  -1   1  140.07    5.60
   1  -9   1  141.47    5.46
  -1   9   1  145.74    5.35
  -9  -1   1  135.50    5.74
  -9   0  -1  229.82    9.05
  -9   0  -1  234.83    8.91
   0   9  -1  249.67    8.70
   0  -9  -1  236.33    8.83
  -9   0   1  239.51    8.96
  -9   0   1  222.36    8.98
   0  -9   1  235.13    8.85
   0   9   1  245.16    8.65
   0  -9   1  244.10    8.69
  -9   1  -1  139.16    5.73
  -9   1  -1  145.22    5.73
   1   9  -1  147.01    5.38
  -1  -9  -1  143.29    5.65
  -1  -9   1  134.22    5.38
  -9   1   1  133.17    5.44
  -1  -9   1  138.26    5.10
  -9   1   1  134.01    5.43
   1   9   1  134.51    5.04
  -2  -9  -1  106.35    4.46
  -9   2  -1  106.51    4.46
   2   9  -1  103.77    4.04
  -9   2  -1  108.56    4.44
  -9   2   1  119.90    4.75
  -2  -9   1  110.73    4.25
   2   9   1  108.23    4.19
  -9   2   1  111.93    4.58
  -2  -9   1  110.44    4.66
  -9   3  -1  168.83    6.78
   3   9  -1  178.01    6.36
  -9   3  -1  171.54    6.69
  -3  -9  -1  171.63    6.86
  -3  -9  -1  175.74    6.32
  -3  -9   1  163.86    6.30
  -3  -9   1  152.44    5.73
   3   9   1  148.07    5.75
  -9   3   1  157.50    6.21
  -9   3   1  156.68    6.02
  -9   4  -1  118.63    4.84
  -9   4  -1  122.04    5.05
  -4  -9  -1  122.44    5.21
  -9   4   1  126.79    5.23
  -4  -9   1  132.46    5.42
  -9   4   1  123.44    4.93
  -4  -9   1  121.61    4.76
  -9   5  -1   65.48    3.25
  -5  -9  -1   68.45    3.48
  -9   5  -1   62.03    2.91
  -5  -9   1   53.40    3.14
  -9   5   1   57.89    2.98
  -9   6  -1   42.29    2.62
  -6  -9  -1   41.96    2.91
  -6  -9   1   38.61    2.84
  -9   6   1   37.69    2.48
  -9   7  -1   32.45    2.41
  -7  -9  -1   31.85    2.82
  -9   7   1   38.82    2.59
  -7  -9   1   41.69    3.08
  -9   8  -1    8.86    1.43
  -8  -9   1    6.03    1.73
  -9   8   1    5.70    1.35
  -9   9  -1   14.50    1.75
  -9  -9  -1   19.97    2.55
  -9   9   1   18.92    1.91
  -9  10  -1   17.85    2.00
 -10  -9  -1   22.23    2.74
 -10  -9   1   16.37    2.49
  -9  10   1   16.26    1.85
 -10  -8  -1   28.71    2.98
  -8  10  -1   28.81    2.27
  -8  10   1   18.30    1.84
 -10  -8   1   20.50    2.46
  -7  10  -1   23.70    1.95
 -10  -7  -1   23.86    2.55
 -10  -7   1   29.22    2.70
  -7  10   1   27.10    2.19
 -10  -6  -1   61.66    3.91
  -6  10  -1   66.02    3.23
 -10  -6   1   68.77    4.06
  -6  10   1   65.01    3.24
 -10  -5  -1   77.65    4.09
  -5  10  -1   74.45    3.48
 -10  -5   1   62.22    3.72
  -5  10   1   66.72    3.13
  -4  10  -1   70.30    3.11
 -10  -4  -1   61.94    3.75
 -10  -4  -1   64.91    3.06
  -4  10   1   82.45    3.57
 -10  -4   1   81.41    4.23
 -10  -4   1   81.13    3.63
  -3  10  -1  112.02    4.50
 -10  -3  -1  110.94    5.07
 -10  -3  -1  107.00    4.59
 -10  -3   1   89.27    4.52
 -10  -3   1   90.77    4.13
  -3  10   1  105.69    4.02
 -10  -2  -1   41.10    2.48
 -10  -2  -1   46.47    2.91
  -2  10  -1   45.87    2.25
  -2  10  -1   47.07    2.44
 -10  -2   1   37.43    2.29
   2 -10   1   36.34    1.95
  -2  10   1   38.33    1.96
 -10  -2   1   36.44    2.62
  -1  10  -1   52.35    2.36
 -10  -1  -1   49.02    2.93
   1 -10  -1   46.51    2.35
 -10  -1  -1   51.11    2.68
  -1  10  -1   52.51    2.50
   1 -10   1   56.82    2.61
  -1  10   1   52.32    2.44
 -10  -1   1   53.32    3.06
  -1  10   1   59.61    2.59
 -10  -1   1   51.09    2.90
   0  10  -1  161.34    6.05
 -10   0  -1  163.18    6.54
   0 -10  -1  158.42    6.21
 -10   0  -1  157.65    6.37
 -10   0   1  151.37    6.17
   0 -10   1  151.13    6.04
   0  10   1  160.88    5.83
 -10   0   1  153.75    6.28
   1  10  -1   59.26    2.48
 -10   1  -1   57.39    2.99
  -1 -10  -1   52.91    2.76
 -10   1  -1   58.64    3.05
 -10   1   1   43.85    2.70
 -10   1   1   51.15    2.73
  -1 -10   1   50.13    2.27
  -1 -10   1   49.46    2.59
   1  10   1   51.35    2.18
 -10   2  -1   38.56    2.44
  -2 -10  -1   40.26    2.37
 -10   2  -1   40.09    2.38
   2  10  -1   38.69    1.84
 -10   2   1   47.74    2.71
  -2 -10   1   45.89    2.13
 -10   2   1   44.59    2.53
  -2 -10   1   48.06    2.61
 -10   3  -1  105.14    4.47
 -10   3  -1  106.04    4.61
  -3 -10  -1  104.35    4.61
 -10   3   1  113.44    4.89
  -3 -10   1  116.10    4.94
 -10   3   1  108.45    4.64
  -4 -10  -1   79.75    3.80
 -10   4  -1   76.63    3.72
 -10   4  -1   75.26    3.45
 -10   4   1   69.75    3.14
 -10   4   1   69.64    3.48
  -4 -10   1   64.64    3.51
 -10   5  -1   69.45    3.54
  -5 -10  -1   69.28    3.70
 -10   5   1   83.74    3.97
  -5 -10   1   80.04    4.10
 -10   6  -1   62.35    3.43
  -6 -10  -1   66.02    3.72
  -6 -10   1   61.45    3.65
 -10   6   1   62.98    3.38
  -7 -10  -1   30.52    2.87
 -10   7  -1   27.41    2.23
  -7 -10   1   25.15    2.54
 -10   7   1   23.26    2.06
 -10   8  -1   22.08    2.12
  -8 -10  -1   24.29    2.61
  -8 -10   1   29.66    2.87
 -10   8   1   25.48    2.22
  -9 -10  -1   19.83    2.59
 -10   9  -1   19.50    2.06
 -10   9   1   18.00    2.04
  -9 -10   1   21.65    2.73
 -10  10  -1    7.71    1.72
 -10 -10  -1    7.95    2.24
 -10  10   1    8.42    1.68
 -10 -10   1   12.75    2.45
 -10  11  -1    4.86    1.64
 -11 -10  -1    7.24    2.39
 -11 -10   1    6.27    2.35
 -10  11   1    2.00    1.48
 -11  -9  -1   10.60    2.53
  -9  11  -1   16.60    1.97
  -9  11   1   18.43    2.05
  -8  11  -1    2.13    1.30
 -11  -8   1   -0.56    1.86
  -8  11   1    3.37    1.28
  -7  11  -1    8.93    1.45
 -11  -7  -1   12.77    2.35
  -7  11   1    9.52    1.45
 -11  -7   1   11.73    2.14
 -11  -6  -1   27.47    2.80
  -6  11  -1   27.93    2.20
  -6  11   1   28.77    2.24
 -11  -6   1   30.54    2.94
 -11  -5  -1   51.32    3.65
  -5  11  -1   51.61    2.79
  -5  11   1   59.65    3.01
 -11  -5   1   56.73    3.85
  -4  11  -1   55.11    2.86
 -11  -4  -1   62.72    3.77
 -11  -4   1   48.79    3.32
 -11  -4   1   41.63    2.55
  -4  11   1   47.09    2.50
  -3  11  -1   76.33    3.30
 -11  -3  -1   66.02    3.42
 -11  -3  -1   73.47    4.06
 -11  -3   1   71.24    3.83
  -3  11   1   66.88    3.04
 -11  -3   1   58.94    3.23
 -11  -2  -1   72.41    3.57
 -11  -2  -1   72.96    3.96
  -2  11  -1   79.35    3.33
 -11  -2   1   68.23    3.56
  -2  11   1   74.13    3.23
 -11  -2   1   78.57    3.92
 -11  -1  -1   83.40    3.95
  -1  11  -1   87.66    3.59
 -11  -1  -1   82.85    4.18
  -1  11   1   69.63    2.93
 -11  -1   1   64.27    3.41
 -11  -1   1   63.29    3.56
 -11   0  -1  125.00    5.40
   0 -11  -1  126.57    5.18
   0  11  -1  132.96    5.03
 -11   0  -1  127.58    5.56
   0  11   1  134.23    4.91
 -11   0   1  121.77    5.43
   0 -11   1  125.32    5.15
 -11   0   1  119.86    5.37
 -11   1  -1   60.48    3.34
   1  11  -1   68.54    2.83
  -1 -11  -1   63.24    3.13
 -11   1  -1   66.08    3.42
 -11   1   1   76.50    3.92
  -1 -11   1   82.64    3.76
 -11   1   1   87.59    3.96
 -11   2  -1   79.42    3.82
  -2 -11  -1   78.57    3.66
 -11   2  -1   71.58    3.66
 -11   2   1   74.53    3.58
  -2 -11   1   73.54    3.62
 -11   2   1   78.34    3.80
 -11   3  -1   67.59    3.41
  -3 -11  -1   69.84    3.54
 -11   3  -1   69.50    3.64
 -11   3   1   72.25    3.43
 -11   3   1   74.41    3.79
  -3 -11   1   69.23    3.58
  -4 -11  -1   47.29    2.94
 -11   4  -1   47.01    2.86
 -11   4  -1   50.88    3.03
  -4 -11   1   55.45    3.37
 -11   4   1   59.31    3.32
  -5 -11  -1   58.76    3.42
 -11   5  -1   53.08    3.27
  -5 -11   1   51.70    3.31
 -11   5   1   51.46    3.18
  -6 -11  -1   30.04    2.64
 -11   6  -1   23.23    2.16
  -6 -11   1   30.13    2.73
 -11   6   1   30.71    2.52
 -11   7  -1    8.79    1.69
  -7 -11  -1    8.86    1.93
  -7 -11   1    8.61    2.04
 -11   7   1    7.22    1.63
  -8 -11  -1    1.82    1.81
 -11   8  -1    1.55    1.49
 -11   8   1    1.96    1.49
  -8 -11   1    2.42    1.82
 -11   9  -1   15.69    2.11
  -9 -11  -1   22.00    2.83
  -9 -11   1   16.76    2.61
 -11   9   1   11.42    1.88
 -11  10  -1    4.34    1.69
 -10 -11  -1    5.11    2.34
 -10 -11   1    3.16    2.21
 -11  10   1    1.98    1.59
 -11  11  -1    1.27    1.65
 -11 -11  -1    0.41    2.27
 -11 -11   1    1.10    2.22
 -11  11   1    0.03    1.61
 -12 -11  -1    4.64    2.60
 -11  12  -1    0.03    1.72
 -11  12   1    2.38    1.79
 -12 -11   1    3.47    2.65
 -12 -10  -1    5.01    2.53
 -10  12  -1    5.71    1.79
 -10  12   1    3.84    1.60
 -12 -10   1   11.33    2.81
  -9  12  -1    9.59    1.73
 -12  -9   1    8.45    2.46
  -9  12   1    8.34    1.67
  -8  12  -1    9.06    1.63
 -12  -8  -1   12.73    2.56
  -8  12   1   11.42    1.72
  -7  12  -1   11.21    1.60
 -12  -7   1    6.36    2.15
  -7  12   1    6.17    1.40
  -6  12  -1   34.30    2.54
 -12  -6  -1   36.36    3.34
  -6  12   1   37.47    2.56
 -12  -6   1   34.53    3.22
 -12  -5  -1   53.78    3.92
  -5  12  -1   49.85    2.87
  -5  12   1   46.88    2.83
 -12  -5   1   55.72    3.87
  -4  12  -1   54.49    2.92
 -12  -4  -1   55.90    3.85
  -4  12   1   64.60    3.20
 -12  -4   1   66.72    4.14
  -3  12  -1   84.69    3.71
 -12  -3  -1   84.99    4.59
 -12  -3  -1   74.36    4.25
 -12  -3   1   66.58    3.49
 -12  -3   1   67.36    4.10
  -3  12   1   73.82    3.29
 -12  -2  -1   77.25    3.96
  -2  12  -1   84.46    3.65
 -12  -2  -1   85.35    4.47
 -12  -2   1   78.15    4.16
 -12  -2   1   89.38    4.52
  -2  12   1   89.73    3.75
 -12  -1  -1  163.82    7.24
  -1  12  -1  187.53    6.92
 -12  -1  -1  185.77    7.54
  -1  12   1  167.44    6.40
 -12  -1   1  157.24    6.80
 -12  -1   1  172.99    7.08
 -12   0  -1  107.03    5.03
 -12   0  -1  114.16    5.20
   0  12  -1  118.54    5.03
 -12   0   1  110.48    4.94
 -12   0   1  102.04    4.90
 -12   1  -1  159.93    6.58
 -12   1  -1  149.85    6.45
  -1 -12   1  171.37    7.07
 -12   1   1  188.24    7.31
 -12   1   1  172.68    7.29
 -12   2  -1   84.29    4.32
  -2 -12  -1   90.87    4.18
 -12   2  -1   94.34    4.33
 -12   2   1   80.48    3.94
  -2 -12   1   78.74    3.92
 -12   2   1   82.43    4.18
 -12   3  -1   77.92    3.76
  -3 -12  -1   70.29    3.77
 -12   3  -1   74.04    3.92
 -12   3   1   77.29    4.14
  -3 -12   1   82.18    4.04
 -12   4  -1   66.62    3.76
  -4 -12  -1   66.44    3.75
 -12   4   1   52.54    3.35
  -4 -12   1   53.90    3.38
  -5 -12  -1   53.93    3.49
 -12   5  -1   54.48    3.45
  -5 -12   1   53.45    3.58
 -12   5   1   54.02    3.47
 -12   6  -1   38.60    3.15
  -6 -12  -1   36.30    3.17
  -6 -12   1   36.28    3.19
 -12   6   1   40.84    3.01
  -7 -12  -1    7.42    2.06
 -12   7  -1    9.19    1.80
 -12   7   1    9.99    1.93
  -7 -12   1   12.46    2.20
 -12   8  -1   15.41    2.13
  -8 -12  -1   16.24    2.56
  -8 -12   1   12.70    2.36
 -12   8   1   11.99    2.01
 -12   9  -1   13.08    2.11
  -9 -12  -1   12.38    2.53
 -12   9   1    9.86    2.02
  -9 -12   1   11.08    2.54
 -12  10  -1    4.67    1.84
 -10 -12  -1    5.21    2.45
 -10 -12   1    7.31    2.56
 -12  10   1    4.45    1.87
 -11 -12  -1    1.90    2.48
 -12  11  -1    3.63    1.94
 -11 -12   1   -0.62    2.42
 -12  11   1    2.48    1.91
 -10  13  -1    2.37    1.68
 -10  13   1    3.00    1.63
  -9  13  -1    9.70    1.83
 -13  -9  -1   12.58    2.87
  -9  13   1    8.56    1.80
  -8  13  -1   13.56    1.93
 -13  -8  -1   16.11    2.86
 -13  -8   1   16.60    2.84
  -8  13   1   12.68    1.86
  -7  13  -1   25.28    2.26
 -13  -7  -1   22.97    3.15
  -7  13   1   21.76    2.09
 -13  -7   1   27.01    3.15
 -13  -6  -1   50.54    4.17
  -6  13  -1   37.61    2.85
 -13  -6   1   35.45    3.42
  -6  13   1   37.40    2.73
 -13  -5  -1   55.10    4.25
  -5  13  -1   59.17    3.24
  -5  13   1   59.40    3.37
 -13  -5   1   71.78    4.57
  -4  13  -1   88.68    4.23
 -13  -4  -1   99.01    5.26
  -4  13   1   72.40    3.54
 -13  -4   1   70.16    4.51
 -13  -3  -1   67.22    4.34
  -3  13  -1   72.43    3.46
  -3  13   1   69.48    3.48
 -13  -3   1   82.31    4.62
 -13  -2  -1   54.33    3.38
  -2  13  -1   62.07    3.04
 -13  -2  -1   62.09    3.98
 -13  -2   1   56.60    3.50
 -13  -2   1   65.57    3.97
 -13  -1  -1   70.04    4.06
 -13  -1  -1   62.64    3.78
 -13  -1   1   58.59    3.61
 -13  -1   1   68.65    3.89
 -13   0  -1   88.28    4.59
 -13   0  -1   97.26    4.82
 -13   0   1  100.56    4.88
 -13   0   1   95.58    4.78
 -13   1  -1   72.14    3.92
 -13   1  -1   65.62    3.76
 -13   1   1   64.05    3.62
 -13   1   1   59.65    3.79
 -13   2  -1   68.10    3.75
 -13   2  -1   66.63    3.82
 -13   2   1   57.93    3.37
 -13   2   1   58.46    3.61
 -13   3  -1   79.22    4.23
  -3 -13  -1   71.35    4.06
  -3 -13   1   68.09    3.78
 -13   3   1   68.39    3.96
  -4 -13  -1   65.12    3.97
 -13   4  -1   81.56    4.28
 -13   4   1   79.34    4.39
  -4 -13   1   79.65    4.29
  -5 -13  -1   61.00    3.79
 -13   5  -1   53.19    3.77
  -5 -13   1   54.90    3.83
 -13   5   1   59.42    3.77
 -13   6  -1   42.34    3.43
  -6 -13  -1   43.56    3.49
  -6 -13   1   38.31    3.52
 -13   6   1   36.44    3.07
  -7 -13  -1   22.38    2.81
 -13   7  -1   23.56    2.55
  -7 -13   1   24.32    2.88
 -13   7   1   25.25    2.68
  -8 -13  -1   15.31    2.73
 -13   8  -1   14.20    2.23
 -13   8   1   15.28    2.30
  -8 -13   1   15.15    2.67
  -9 -13  -1    8.67    2.58
 -13   9  -1    8.58    2.20
  -9 -13   1   15.48    2.80
 -13   9   1    7.33    2.11
 -10 -13  -1    0.85    2.39
 -10 -13   1    4.07    2.59
  -8  14  -1   11.41    1.93
 -14  -8  -1   12.98    2.98
  -8  14   1   10.85    1.85
  -7  14  -1   14.23    1.98
 -14  -7  -1   20.50    3.17
 -14  -7   1   13.32    2.88
  -7  14   1   16.25    1.96
 -14  -6  -1   21.80    3.11
  -6  14  -1   18.87    2.03
  -6  14   1   12.67    1.79
 -14  -6   1   20.15    2.90
  -5  14  -1   27.92    2.29
 -14  -5  -1   24.71    3.19
 -14  -5   1   33.19    3.45
  -5  14   1   36.79    2.67
 -14  -4  -1   45.73    3.98
  -4  14  -1   43.89    2.85
 -14  -4   1   51.17    4.26
  -4  14   1   43.20    3.22
 -14  -3  -1   45.13    3.82
 -14  -3   1   42.66    3.75
 -14  -2  -1   54.60    3.96
 -14  -2   1   38.32    3.47
 -14  -1  -1   47.44    3.39
 -14  -1  -1   61.46    4.03
 -14  -1   1   48.55    3.57
 -14  -1   1   58.04    3.77
 -14   0  -1   40.51    3.47
 -14   0  -1   41.64    3.29
 -14   0   1   45.97    3.29
 -14   0   1   37.12    3.02
 -14   1  -1   58.86    3.86
 -14   1  -1   61.46    3.89
 -14   1   1   53.07    3.78
 -14   1   1   57.53    3.63
 -14   2  -1   43.31    3.45
 -14   2   1   47.62    3.66
 -14   3  -1   39.88    3.17
 -14   3   1   40.88    3.18
 -14   4  -1   39.91    3.24
 -14   4   1   35.01    3.11
  -4 -14   1   49.25    3.85
 -14   5  -1   34.59    3.16
  -5 -14  -1   34.67    3.12
  -5 -14   1   27.58    2.81
 -14   5   1   22.08    2.66
  -6 -14  -1   14.45    2.44
 -14   6  -1    9.48    2.22
 -14   6   1   19.99    2.58
  -6 -14   1   19.12    2.67
  -7 -14  -1   13.30    2.58
 -14   7  -1   17.05    2.58
  -7 -14   1   17.93    2.77
 -14   7   1   11.68    2.42
  -8 -14  -1   13.69    2.68
 -14   8  -1   12.21    2.39
  -8 -14   1   11.66    2.74
 -14   8   1   17.92    2.55
  -6  15  -1    7.60    1.69
 -15  -6  -1   13.84    3.05
 -15  -6   1   11.27    2.88
  -6  15   1    8.75    1.88
  -5  15  -1   16.18    3.15
 -15  -5  -1   13.88    2.86
 -15  -5   1   16.62    2.90
 -15  -4  -1   19.67    3.01
 -15  -4   1   20.50    2.90
 -15  -3  -1   14.80    2.63
 -15  -3   1   22.80    2.97
 -15  -2  -1   28.88    3.14
 -15  -2   1   36.28    3.40
 -15  -1  -1   39.29    3.62
 -15  -1   1   38.06    4.04
 -15  -1   1   39.32    3.59
 -15   0  -1   48.07    3.66
 -15   0  -1   43.06    3.62
 -15   0   1   46.50    3.78
 -15   0   1   60.07    4.02
 -15   1  -1   35.44    3.08
 -15   1   1   37.09    3.19
 -15   2  -1   33.38    3.08
 -15   2   1   22.24    2.75
 -15   3  -1   22.34    2.74
 -15   3   1   12.90    2.42
 -15   4  -1   24.58    2.81
 -15   4   1   24.32    2.79
 -15   5  -1   11.66    2.37
 -15   5   1   17.45    2.64
 -15   6  -1   11.18    2.49
 -15   6   1    7.43    2.32
 -16  -3  -1   14.05    2.95
 -16  -3   1   17.75    2.95
 -16  -2  -1   28.18    3.31
 -16  -2   1   22.90    3.09
 -16  -1  -1   18.33    2.79
 -16  -1   1   20.24    2.80
 -16   0  -1   22.00    3.71
 -16   0   1   19.13    3.42
 -16   1  -1   11.11    2.44
 -16   1   1   18.49    2.61
 -16   2  -1   27.41    3.05
 -16   2   1   22.82    2.90
 -16   3  -1   12.56    2.50
 -16   3   1   21.12    2.89
   0   0  -2   -0.06    0.05
   0   0  -2   -0.04    0.04
   0   0   2    0.00    0.05
   0   0   2   -0.01    0.01
  -1   0   2   -0.10    0.06
   0   1   2    0.08    0.04
   0  -1   2    0.04    0.06
  -1   0   2    0.07    0.07
   0  -1   2   -0.03    0.10
   1   0   2    0.03    0.05
  -1   2  -2  479.60   16.90
  -2  -1  -2  475.61   16.83
  -1   2  -2  489.06   16.93
  -2  -1  -2  477.29   16.97
  -2  -1   2  405.43   14.20
  -2  -1   2  397.42   14.27
   1  -2   2  414.80   14.20
   1  -2   2  411.34   14.22
  -1   2   2  429.50   14.19
   2   1   2  359.42   14.11
   0  -2  -2   96.32    3.20
   0  -2  -2   91.22    3.18
  -2   0  -2   86.15    3.19
  -2   0  -2   78.87    3.26
   0  -2   2   90.96    3.35
   0   2   2   96.38    3.34
   0  -2   2   96.67    3.43
  -2   0   2   83.73    3.39
  -2   0   2   91.63    3.40
   0   2   2   96.56    3.32
  -1  -2  -2  417.22   14.52
  -2   1  -2  415.65   14.48
   2  -1  -2  399.48   14.44
  -2   1  -2  412.06   14.52
  -2   1   2  503.01   17.10
  -1  -2   2  478.20   17.10
  -2   1   2  468.97   17.16
  -1  -2   2  510.66   17.23
   2  -1   2  474.75   17.13
  -2   2  -2    9.75    0.62
  -2   2  -2    8.71    0.61
  -2  -2  -2    9.51    0.75
  -2  -2   2    8.14    0.72
  -2  -2   2    9.12    0.56
   2  -2   2    9.18    0.60
  -2   3  -2  331.77   11.61
  -3  -2  -2  332.84   11.51
  -3  -2  -2  297.31   11.70
  -2   3  -2  344.23   11.61
  -3  -2   2  339.73   11.82
  -3  -2   2  312.31   11.95
  -2   3   2  345.93   11.86
   2  -3   2  335.27   11.85
  -3  -1  -2   18.52    0.87
  -1   3  -2   19.74    0.96
  -1   3  -2   19.24    0.91
   1  -3  -2   19.54    0.79
  -3  -1   2   21.32    1.09
   1  -3   2   23.20    1.04
   1  -3   2   23.03    1.07
  -1   3   2   22.89    0.90
  -3  -1   2   23.38    1.18
  -1   3   2   22.91    1.00
  -3   0  -2  830.72   28.97
  -3   0  -2  795.30   28.87
   0  -3  -2  842.32   28.86
   0  -3   2  830.48   29.40
   0  -3   2  878.84   29.51
  -3   0   2  791.71   29.46
  -3   0   2  834.16   29.48
   0   3   2  857.13   29.37
  -3   1  -2   22.43    1.05
  -1  -3  -2   22.21    1.07
  -3   1  -2   22.08    1.12
   1   3   2   17.83    0.73
  -3   1   2   19.22    0.90
  -3   1   2   17.81    0.99
  -1  -3   2   18.59    1.06
  -1  -3   2   19.20    0.86
   1   3   2   19.52    0.75
  -3   2  -2  342.99   12.40
  -3   2  -2  354.25   12.42
  -2  -3  -2  349.63   12.48
  -2  -3   2  354.83   12.39
  -2  -3   2  340.71   12.19
  -3   2   2  343.20   12.16
  -3   2   2  342.48   12.29
   3  -3  -2   55.21    2.07
  -3   3  -2   58.35    2.24
  -3  -3  -2   57.91    2.41
  -3  -3  -2   55.06    2.05
  -3   3  -2   56.33    2.27
  -3   3   2   58.53    2.30
  -3  -3   2   52.76    2.41
  -3   3   2   58.70    2.07
  -3  -3   2   55.52    2.17
  -4  -3  -2  195.18    6.77
  -4  -3  -2  173.09    7.06
  -3   4  -2  191.14    6.93
  -3   4  -2  197.92    6.88
  -4  -3   2  164.01    6.69
  -4  -3   2  186.89    6.47
  -3   4   2  183.63    6.54
  -4  -2  -2   16.55    0.88
  -2   4  -2   16.27    0.94
  -2   4  -2   18.38    0.93
  -2   4   2   12.97    0.81
  -4  -2   2   12.44    1.00
  -4  -2   2   12.91    0.88
   2  -4   2   12.29    0.84
  -4  -1  -2  615.24   23.52
  -4  -1  -2  670.73   23.38
  -1   4  -2  689.28   23.46
   1  -4  -2  678.45   23.33
  -1   4  -2  668.12   23.40
  -4  -1   2  660.23   23.60
  -4  -1   2  609.42   23.67
   1  -4   2  687.74   23.56
   1  -4   2  685.64   23.61
  -1   4   2  701.34   23.54
   0   4  -2   -0.04    0.25
   0  -4  -2    0.34    0.33
  -4   0  -2   -0.11    0.34
  -4   0  -2   -0.06    0.43
  -4   0   2    0.00    0.40
  -4   0   2    0.10    0.40
   0   4   2    0.14    0.23
   0  -4   2    0.17    0.30
   0  -4   2    0.25    0.38
  -4   1  -2  661.66   23.40
  -1  -4  -2  699.04   23.43
  -4   1  -2  629.48   23.44
  -4   1   2  661.61   23.85
  -1  -4   2  705.30   23.93
  -1  -4   2  675.72   23.73
   1   4   2  656.05   23.66
  -4   1   2  679.09   23.81
  -4   2  -2   13.22    0.89
  -4   2  -2   13.73    0.91
  -2  -4  -2   11.84    0.55
  -2  -4  -2   13.19    0.96
   2   4   2   16.24    0.68
  -2  -4   2   17.20    0.85
  -4   2   2   18.53    1.08
  -4   2   2   16.50    0.86
  -2  -4   2   18.44    1.17
  -3  -4  -2  169.35    6.77
  -4   3  -2  189.31    6.66
  -4   3  -2  187.35    6.70
  -3  -4   2  192.18    6.90
  -4   3   2  190.38    7.06
  -4   3   2  191.44    6.87
  -3  -4   2  196.80    7.21
  -4  -4  -2  230.73    8.42
  -4   4  -2  221.90    8.23
  -4   4  -2  231.07    8.17
  -4  -4  -2  219.40    7.97
  -4  -4   2  219.44    7.95
  -4   4   2  222.38    7.85
  -4   4   2  226.93    8.11
  -4  -4   2  217.19    8.28
  -5  -4  -2  354.71   12.37
  -5  -4  -2  343.46   12.81
  -4   5  -2  357.52   12.50
  -4   5  -2  341.91   12.59
  -5  -4   2  288.19   11.58
  -4   5   2  323.31   11.41
  -5  -4   2  332.93   11.29
  -5  -3  -2   68.31    2.59
  -5  -3  -2   60.90    2.92
  -3   5  -2   68.78    2.64
  -3   5  -2   67.71    2.73
  -3   5   2   79.18    3.23
  -5  -3   2   83.91    3.49
  -5  -3   2   83.07    3.21
   2  -5  -2  349.01   12.24
  -5  -2  -2  330.56   12.57
  -2   5  -2  348.30   12.40
  -5  -2  -2  352.20   12.35
  -2   5  -2  353.80   12.39
   2  -5   2  345.16   12.16
   2  -5   2  339.81   12.16
  -5  -2   2  335.50   12.18
  -5  -2   2  337.66   12.36
  -2   5   2  342.60   12.01
  -2   5   2  340.54   12.15
  -1   5  -2    0.83    0.42
  -1   5  -2    1.62    0.37
  -5  -1  -2    2.00    0.47
   1  -5  -2    1.46    0.35
  -5  -1  -2    1.52    0.64
  -5  -1   2    0.42    0.52
  -5  -1   2    0.78    0.50
  -1   5   2    1.06    0.34
   1  -5   2    0.66    0.43
   1  -5   2    0.45    0.38
  -5   0  -2  284.34   10.54
   0  -5  -2  293.31   10.40
  -5   0  -2  289.82   10.42
   0   5  -2  294.21   10.36
   0   5   2  292.88   10.21
   0  -5   2  299.65   10.39
  -5   0   2  264.16   10.36
   0  -5   2  290.79   10.25
  -5   0   2  289.49   10.38
  -1  -5  -2   -0.21    0.43
  -5   1  -2    0.24    0.45
  -5   1  -2    0.30    0.50
  -1  -5   2    2.01    0.38
  -5   1   2    1.89    0.49
  -5   1   2    2.32    0.57
  -1  -5   2    1.51    0.55
   1   5   2    1.75    0.28
  -5   2  -2  326.32   11.94
  -2  -5  -2  327.49   11.69
  -2  -5  -2  352.17   12.02
  -5   2  -2  323.12   11.93
  -5   2   2  362.58   12.57
  -2  -5   2  353.19   12.37
  -2  -5   2  359.37   12.65
  -5   2   2  339.89   12.44
   2   5   2  332.28   12.27
  -3  -5  -2   80.66    3.30
  -3  -5  -2   73.17    2.80
  -5   3  -2   81.32    3.16
  -5   3  -2   78.42    3.10
  -3  -5   2   70.17    2.98
  -5   3   2   66.69    2.83
  -3  -5   2   68.89    2.59
  -5   3   2   65.27    2.60
  -5   4  -2  325.81   12.12
  -5   4  -2  338.54   12.04
  -4  -5  -2  341.35   12.31
  -5   4   2  351.00   12.55
  -5   4   2  339.21   12.29
  -4  -5   2  347.26   12.33
  -4  -5   2  351.84   12.72
  -5  -5  -2   15.92    0.79
  -5   5  -2   15.61    1.22
  -5   5  -2   16.81    1.09
  -5  -5  -2   15.74    1.44
  -5   5   2   16.61    1.28
  -5   5   2   15.71    0.80
  -5  -5   2   16.23    0.99
  -5  -5   2   15.01    1.44
  -6  -5  -2  133.34    5.41
  -5   6  -2  136.18    4.92
  -5   6  -2  125.21    5.08
  -6  -5  -2  126.85    4.75
  -6  -5   2  126.03    4.49
  -6  -5   2  110.67    4.94
  -5   6   2  117.52    4.68
  -6  -4  -2   99.41    3.70
  -4   6  -2   97.75    3.89
  -6  -4  -2   90.68    4.15
  -4   6  -2  101.40    3.76
  -6  -4   2   95.84    4.31
  -4   6   2  103.32    4.04
  -6  -4   2  105.26    3.94
  -3   6  -2  115.17    4.43
  -6  -3  -2  118.84    4.74
  -6  -3  -2  109.58    4.32
  -3   6  -2  116.94    4.34
  -3   6   2  132.04    4.93
  -6  -3   2  129.98    5.21
  -6  -3   2  126.74    4.91
  -6  -2  -2    0.21    0.67
  -2   6  -2    1.24    0.46
  -6  -2  -2    0.15    0.48
   2  -6  -2    0.70    0.33
  -2   6  -2    0.50    0.43
   2  -6   2    2.45    0.55
  -6  -2   2    2.69    0.67
  -2   6   2    3.07    0.41
  -2   6   2    3.72    0.54
  -6  -2   2    3.28    0.80
   2  -6   2    2.88    0.56
  -1   6  -2  228.62    8.07
  -1   6  -2  213.13    7.95
  -6  -1  -2  218.93    8.22
  -6  -1  -2  220.49    8.01
   1  -6  -2  218.14    7.92
  -1   6   2  232.87    8.05
  -6  -1   2  210.79    8.16
  -6  -1   2  206.28    8.27
   1  -6   2  231.14    8.15
   1  -6   2  231.57    8.08
  -6   0  -2    0.35    0.54
  -6   0  -2    1.15    0.63
   0  -6  -2    0.96    0.45
   0   6  -2    0.60    0.36
  -6   0   2    0.29    0.58
   0  -6   2    0.76    0.40
   0  -6   2    0.79    0.52
   0   6   2    1.40    0.35
  -6   0   2    0.33    0.58
  -1  -6  -2  231.01    8.36
   1   6  -2  228.29    8.19
  -6   1  -2  232.97    8.37
  -6   1  -2  220.26    8.41
  -1  -6   2  221.54    7.98
  -6   1   2  211.95    7.88
  -6   1   2  210.87    7.93
  -1  -6   2  212.78    7.72
   1   6   2  216.04    7.66
  -6   2  -2    2.19    0.64
  -2  -6  -2    2.57    0.66
  -2  -6  -2    2.76    0.34
  -6   2  -2    1.49    0.61
  -6   2   2    1.28    0.51
  -6   2   2    0.30    0.58
   2   6   2    0.77    0.26
  -2  -6   2    0.41    0.35
  -2  -6   2    0.74    0.62
  -3  -6  -2  119.50    4.56
  -6   3  -2  128.54    4.95
  -3  -6  -2  133.01    5.06
  -6   3  -2  131.18    4.90
  -3  -6   2  114.06    4.10
  -3  -6   2  106.18    4.46
  -6   3   2  109.78    4.16
   3   6   2  107.23    3.96
  -6   3   2  115.44    4.40
  -4  -6  -2   93.35    4.24
  -6   4  -2  110.09    4.04
  -6   4  -2  103.66    4.15
  -4  -6   2   97.95    4.15
  -6   4   2   94.18    3.67
  -6   4   2   97.51    3.96
  -4  -6   2  100.65    3.67
  -6   5  -2  132.97    4.91
  -5  -6  -2  125.65    5.28
  -6   5  -2  125.86    5.06
  -6   5   2  122.52    4.83
  -6   5   2  123.70    4.47
  -5  -6   2  113.14    5.01
  -5  -6   2  126.03    4.54
  -6   6  -2   49.77    2.21
  -6   6  -2   53.66    2.46
  -6  -6  -2   49.54    2.76
  -6  -6  -2   47.21    1.92
  -6  -6   2   49.86    2.10
  -6   6   2   46.77    1.90
  -6  -6   2   51.97    2.78
  -6   6   2   47.73    2.40
  -6   7  -2   11.23    0.96
  -7  -6  -2    9.28    1.46
  -6   7  -2    7.93    1.10
  -7  -6   2   18.42    1.83
  -6   7   2   17.32    1.42
  -7  -6   2   17.76    1.24
  -5   7  -2  124.39    5.01
  -7  -5  -2  127.43    4.72
  -7  -5  -2  124.52    5.35
  -5   7  -2  129.28    4.80
  -7  -5   2  120.07    5.12
  -5   7   2  114.10    4.72
  -7  -5   2  120.57    4.57
  -7  -4  -2   31.79    2.14
  -4   7  -2   34.33    1.60
  -7  -4  -2   34.19    1.64
  -4   7  -2   32.16    1.78
  -7  -4   2   41.93    2.53
  -7  -4   2   47.26    2.17
  -4   7   2   48.65    2.21
  -3   7  -2   89.18    3.47
  -7  -3  -2   83.97    3.39
  -7  -3  -2   80.81    3.77
  -3   7  -2   86.13    3.34
  -3   7   2   96.31    3.83
  -3   7   2   97.52    3.57
  -7  -3   2   92.73    3.86
  -7  -3   2  102.67    4.24
  -2   7  -2   36.32    1.77
   2  -7  -2   37.67    1.63
  -2   7  -2   39.22    1.80
  -7  -2  -2   40.48    2.21
  -7  -2  -2   38.20    1.86
  -2   7   2   54.20    2.17
  -7  -2   2   51.99    2.44
  -2   7   2   52.72    2.28
   2  -7   2   53.92    2.32
   2  -7   2   54.37    2.33
  -7  -2   2   54.57    2.69
  -7  -1  -2    7.72    1.04
  -1   7  -2    7.29    0.70
  -1   7  -2    8.15    0.82
   1  -7  -2    7.47    0.69
  -7  -1  -2    6.70    0.83
  -7  -1   2    4.57    0.82
  -1   7   2    4.67    0.57
   1  -7   2    4.68    0.64
  -7  -1   2    3.75    0.92
   1  -7   2    4.12    0.71
  -7   0  -2  100.11    4.29
   0   7  -2  109.93    4.01
   0  -7  -2  112.57    4.11
  -7   0  -2   98.70    4.13
  -7   0   2  111.51    4.40
   0  -7   2  112.18    4.17
  -7   0   2  103.40    4.37
   0  -7   2  110.83    4.34
   0   7   2  110.83    4.10
   1   7  -2    4.52    0.53
  -1  -7  -2    5.02    0.74
  -7   1  -2    4.08    0.76
  -7   1  -2    5.60    0.87
  -7   1   2    5.47    0.89
  -7   1   2    6.96    0.90
  -1  -7   2    6.69    0.89
  -1  -7   2    7.69    0.66
   1   7   2    6.83    0.55
  -2  -7  -2   48.67    2.45
  -7   2  -2   55.03    2.48
  -7   2  -2   56.37    2.48
  -7   2   2   33.36    1.81
  -2  -7   2   40.31    2.06
  -2  -7   2   39.50    1.66
  -7   2   2   39.71    2.04
   2   7   2   37.85    1.53
  -3  -7  -2   92.19    3.49
  -3  -7  -2   96.83    4.02
  -7   3  -2   97.20    3.86
  -7   3  -2   97.34    3.95
   3   7   2   82.78    3.16
  -7   3   2   88.10    3.66
  -7   3   2   90.86    3.45
  -3  -7   2   87.10    3.30
  -3  -7   2   84.33    3.76
  -7   4  -2   45.22    2.33
  -7   4  -2   47.42    2.21
  -4  -7  -2   48.74    2.54
   4   7   2   30.93    1.26
  -4  -7   2   33.66    1.47
  -4  -7   2   27.59    1.95
  -7   4   2   32.14    1.85
  -7   4   2   31.50    1.54
  -7   5  -2  123.44    4.77
  -7   5  -2  121.96    4.97
  -5  -7  -2  123.31    5.19
  -7   5   2  124.83    4.99
  -5  -7   2  120.98    4.60
  -5  -7   2  126.79    5.23
  -7   5   2  122.84    4.60
  -7   6  -2   19.29    1.56
  -6  -7  -2   19.94    1.87
  -7   6  -2   19.73    1.36
  -6  -7   2    9.44    0.81
  -7   6   2    7.83    1.07
  -6  -7   2    7.61    1.30
  -7  -7  -2   86.34    4.33
  -7   7  -2   97.53    4.07
  -7   7   2   92.19    3.91
  -7  -7   2   88.52    4.26
  -7  -7   2   86.37    3.50
  -8  -7  -2   11.01    1.80
  -7   8  -2    8.94    1.31
  -8  -7   2   18.92    2.07
  -7   8   2   12.45    1.41
  -8  -6  -2  106.01    4.95
  -6   8  -2  106.63    4.48
  -8  -6   2  125.06    4.91
  -6   8   2  124.64    5.13
  -8  -6   2  131.83    5.66
  -5   8  -2   45.40    2.07
  -8  -5  -2   45.75    2.88
  -8  -5  -2   44.27    2.07
  -5   8  -2   43.09    2.33
  -5   8   2   46.05    2.41
  -8  -5   2   47.89    2.96
  -8  -5   2   50.18    2.35
  -4   8  -2  120.87    4.73
  -4   8  -2  121.00    4.53
  -8  -4  -2  111.83    5.09
  -8  -4  -2  119.30    4.59
  -8  -4   2  137.81    5.77
  -8  -4   2  135.25    5.33
  -4   8   2  137.55    5.33
  -8  -3  -2   19.57    1.80
  -8  -3  -2   15.79    1.34
  -3   8  -2   17.45    1.31
  -3   8  -2   17.51    1.18
  -3   8   2   18.57    0.97
  -3   8   2   18.41    1.31
  -8  -3   2   16.84    1.67
  -8  -3   2   18.01    1.43
  -8  -2  -2   15.82    1.23
  -8  -2  -2   15.20    1.48
   2  -8  -2   14.38    0.99
  -2   8  -2   15.56    1.18
  -2   8  -2   15.49    1.14
  -2   8   2   10.46    0.86
  -2   8   2    8.59    0.82
  -8  -2   2    9.01    1.22
   2  -8   2    9.31    0.89
  -8  -2   2    8.92    1.08
  -8  -1  -2   16.02    1.32
  -8  -1  -2   14.88    1.41
  -1   8  -2   14.15    1.06
   1  -8  -2   13.82    1.04
  -1   8  -2   14.38    1.17
   1  -8   2   19.15    1.22
  -8  -1   2   16.09    1.48
  -8  -1   2   18.44    1.55
  -1   8   2   16.49    1.10
   1  -8   2   17.63    1.30
  -8   0  -2    5.72    0.88
   0   8  -2    5.12    0.64
   0  -8  -2    6.09    0.78
  -8   0  -2    6.20    1.03
  -8   0   2    5.64    0.96
   0   8   2    6.05    0.63
   0  -8   2    6.72    0.88
  -8   0   2    4.61    0.98
   0  -8   2    5.66    0.69
  -8   1  -2   17.84    1.44
   1   8  -2   17.28    1.05
  -8   1  -2   15.39    1.47
  -1  -8  -2   17.29    1.33
  -8   1   2   15.31    1.39
   1   8   2   14.92    0.91
  -1  -8   2   15.26    1.06
  -8   1   2   14.54    1.35
  -1  -8   2   14.36    1.35
  -2  -8  -2    8.14    1.02
   2   8  -2    9.35    0.72
  -8   2  -2    7.56    1.02
  -8   2  -2    7.82    1.01
  -8   2   2   15.31    1.36
  -2  -8   2   16.60    1.07
  -8   2   2   19.08    1.48
   2   8   2   15.49    0.89
  -2  -8   2   16.88    1.47
  -8   3  -2   21.32    1.67
  -3  -8  -2   20.51    1.63
  -8   3  -2   20.67    1.52
   3   8   2   15.73    0.84
  -3  -8   2   14.21    1.47
  -8   3   2   17.37    1.41
  -8   3   2   17.28    1.30
  -3  -8   2   15.81    1.04
  -4  -8  -2  133.77    5.54
  -8   4  -2  134.87    5.41
  -8   4  -2  134.90    5.26
  -4  -8  -2  134.51    5.02
  -4  -8   2  124.40    5.15
  -8   4   2  122.80    4.99
  -4  -8   2  119.03    4.55
  -8   4   2  121.78    4.69
  -8   5  -2   44.46    2.49
  -5  -8  -2   43.20    2.67
  -8   5  -2   47.39    2.23
  -8   5   2   42.52    1.96
  -8   5   2   41.82    2.40
  -5  -8   2   41.75    1.87
  -5  -8   2   44.36    2.67
  -6  -8  -2  122.96    5.53
  -8   6  -2  129.01    5.00
  -8   6  -2  132.01    5.31
  -6  -8   2   97.43    4.66
  -8   6   2  107.81    4.45
  -7  -8  -2   13.77    1.88
  -8   7  -2   15.32    1.58
  -7  -8   2   10.04    1.65
  -8   7   2   10.62    1.38
  -8  -8  -2  267.57   10.63
  -8   8  -2  265.09   10.15
  -8  -8   2  265.42   10.25
  -8   8   2  245.74    9.73
  -8   9  -2   -0.40    1.06
  -9  -8  -2   -0.72    1.53
  -9  -8   2    0.85    1.53
  -8   9   2    1.00    1.07
  -7   9  -2  150.31    6.30
  -9  -7  -2  161.19    6.92
  -9  -7   2  125.68    5.91
  -7   9   2  135.63    5.48
  -6   9  -2    5.54    1.09
  -9  -6  -2    7.75    1.72
  -6   9   2    9.96    1.22
  -9  -6   2   10.15    1.74
  -5   9  -2  172.22    6.55
  -9  -5  -2  161.23    7.01
  -9  -5   2  164.15    6.69
  -9  -5   2  153.09    6.03
  -5   9   2  150.17    6.10
  -9  -4  -2   14.96    1.78
  -9  -4  -2   19.60    1.49
  -4   9  -2   20.04    1.48
  -4   9   2   16.72    1.28
  -9  -4   2   10.66    1.65
  -9  -4   2   19.24    1.58
  -9  -3  -2   83.46    3.99
  -3   9  -2   81.50    3.40
  -3   9  -2   80.43    3.30
  -9  -3  -2   75.51    3.43
  -9  -3   2   89.36    4.17
  -3   9   2   88.53    3.63
  -9  -3   2   84.49    3.77
   2  -9  -2   42.33    1.94
  -9  -2  -2   41.53    2.61
  -9  -2  -2   43.13    2.28
  -2   9  -2   45.05    2.14
  -2   9  -2   43.96    2.11
   2  -9   2   43.87    2.14
  -2   9   2   43.50    2.08
  -9  -2   2   43.84    2.41
  -2   9   2   42.59    1.98
  -9  -2   2   47.78    2.68
  -1   9  -2    6.53    0.91
   1  -9  -2    7.13    0.83
  -9  -1  -2    7.53    1.06
  -1   9  -2    4.94    0.74
  -9  -1  -2    8.24    1.33
  -9  -1   2    9.97    1.25
  -9  -1   2    9.49    1.35
  -1   9   2    8.95    0.83
   1  -9   2    9.89    1.06
   1  -9   2    9.12    0.94
   0  -9  -2   48.51    2.28
  -9   0  -2   49.55    2.50
  -9   0  -2   45.25    2.60
   0   9  -2   46.99    2.15
   0  -9   2   47.16    2.36
  -9   0   2   45.80    2.56
   0   9   2   47.93    2.08
   0  -9   2   46.75    2.17
  -9   0   2   51.05    2.59
   1   9  -2    7.99    0.79
  -1  -9  -2   10.93    1.14
  -9   1  -2    9.36    1.18
  -9   1  -2    8.43    1.20
  -1  -9   2    6.71    1.01
  -1  -9   2    6.96    0.77
  -9   1   2    5.48    1.05
  -9   1   2    5.52    1.09
   1   9   2    5.75    0.62
  -9   2  -2   40.11    2.35
  -2  -9  -2   44.54    2.38
   2   9  -2   46.57    1.97
  -9   2  -2   45.36    2.43
  -2  -9   2   43.29    1.97
  -9   2   2   46.80    2.56
   2   9   2   43.44    1.84
  -9   2   2   43.13    2.32
  -2  -9   2   43.22    2.44
  -3  -9  -2   87.17    4.00
  -9   3  -2   91.97    3.97
   3   9  -2   91.38    3.51
  -9   3  -2   89.54    3.86
  -3  -9   2   81.50    3.79
  -9   3   2   82.10    3.45
  -9   3   2   84.61    3.73
  -3  -9   2   76.11    3.18
  -4  -9  -2   18.38    1.72
  -9   4  -2   17.16    1.63
  -9   4  -2   18.00    1.57
  -9   4   2   15.64    1.33
  -9   4   2   13.49    1.45
  -4  -9   2   17.27    1.70
  -4  -9   2   14.90    1.13
  -5  -9  -2  156.80    6.69
  -9   5  -2  165.94    6.30
  -9   5  -2  165.06    6.53
  -5  -9   2  172.82    7.00
  -9   5   2  165.61    6.76
  -6  -9  -2   10.45    1.63
  -9   6  -2    8.98    1.37
  -9   6   2    6.28    1.20
  -6  -9   2    5.68    1.50
  -9   7  -2  138.91    5.97
  -7  -9  -2  147.58    6.39
  -9   7   2  137.88    5.73
  -7  -9   2  134.29    6.08
  -9   8  -2   -0.03    1.15
  -8  -9  -2   -0.86    1.48
  -8  -9   2   -0.14    1.52
  -9   8   2   -0.78    1.11
  -9   9  -2  231.52    9.38
  -9  -9  -2  247.34    9.99
  -9   9   2  229.06    8.99
  -9  -9   2  227.53    9.54
 -10  -9  -2    6.10    2.11
  -9  10  -2    0.92    1.33
 -10  -9   2    2.33    1.93
  -9  10   2    1.24    1.28
 -10  -8  -2  150.87    7.04
  -8  10  -2  154.99    6.41
 -10  -8   2  155.82    6.97
  -8  10   2  143.40    6.21
  -7  10  -2    3.13    1.19
 -10  -7  -2    3.72    1.84
  -7  10   2    4.18    1.15
 -10  -7   2    4.04    1.69
 -10  -6  -2   78.80    4.42
  -6  10  -2   79.10    3.71
  -6  10   2   67.97    3.40
 -10  -6   2   78.86    4.26
  -5  10  -2   10.20    1.24
 -10  -5  -2    8.64    1.84
 -10  -5   2   12.27    1.33
  -5  10   2   10.98    1.26
 -10  -5   2   11.98    1.84
 -10  -4  -2   88.93    4.40
  -4  10  -2   82.89    3.69
 -10  -4  -2   81.24    3.63
 -10  -4   2   84.09    4.31
 -10  -4   2   86.32    3.81
  -4  10   2   82.83    3.65
 -10  -3  -2    2.20    1.32
  -3  10  -2    1.45    0.78
 -10  -3  -2    2.51    0.95
 -10  -3   2    4.91    1.06
  -3  10   2    2.57    0.77
 -10  -3   2    3.55    1.33
 -10  -2  -2   56.47    3.22
  -2  10  -2   55.86    2.55
 -10  -2  -2   49.86    2.74
  -2  10  -2   53.03    2.52
 -10  -2   2   63.45    3.40
  -2  10   2   63.22    2.79
   2 -10   2   60.33    2.82
 -10  -2   2   64.52    3.13
 -10  -1  -2   42.33    2.41
  -1  10  -2   42.65    2.25
   1 -10  -2   43.65    2.12
  -1  10  -2   42.88    2.11
 -10  -1  -2   38.61    2.69
   1 -10   2   43.85    2.30
 -10  -1   2   48.90    2.65
 -10  -1   2   42.63    2.69
  -1  10   2   45.80    2.14
   0  10  -2   13.60    1.07
   0 -10  -2   12.03    1.20
 -10   0  -2   13.71    1.60
 -10   0  -2   14.67    1.44
 -10   0   2   13.23    1.49
 -10   0   2   13.50    1.55
   0 -10   2   13.69    1.11
   0  10   2   12.73    1.07
   0 -10   2   13.02    1.31
 -10   1  -2   44.69    2.63
 -10   1  -2   44.84    2.57
   1  10  -2   44.87    2.12
  -1 -10  -2   49.35    2.45
 -10   1   2   42.99    2.61
   1  10   2   42.22    1.91
  -1 -10   2   44.66    2.08
 -10   1   2   39.02    2.41
  -1 -10   2   41.70    2.39
   2  10  -2   64.87    2.66
 -10   2  -2   64.03    3.20
 -10   2  -2   59.65    3.06
  -2 -10  -2   61.51    3.06
  -2 -10   2   53.10    2.37
  -2 -10   2   50.19    2.76
 -10   2   2   53.81    2.78
 -10   2   2   53.57    2.96
   3  10  -2    3.30    0.74
  -3 -10  -2    2.87    1.06
 -10   3  -2    3.57    1.05
 -10   3  -2    4.41    1.18
  -3 -10   2    1.45    0.67
  -3 -10   2    2.55    1.08
 -10   3   2    1.90    0.92
 -10   3   2    2.10    1.13
 -10   4  -2   85.40    3.86
  -4 -10  -2   86.78    4.17
 -10   4  -2   94.82    4.19
  -4 -10   2   85.11    4.16
 -10   4   2   85.80    3.96
 -10   4   2   83.38    4.03
 -10   5  -2   11.19    1.52
  -5 -10  -2   11.60    1.68
  -5 -10   2   10.94    1.72
 -10   5   2   10.56    1.50
 -10   6  -2   74.85    3.72
  -6 -10  -2   70.64    3.94
  -6 -10   2   78.67    4.21
 -10   6   2   77.68    3.89
 -10   7  -2    5.81    1.43
  -7 -10  -2    5.83    1.66
  -7 -10   2    3.16    1.62
 -10   7   2    4.12    1.37
 -10   8  -2  151.78    6.54
  -8 -10  -2  156.81    7.06
  -8 -10   2  153.68    6.93
 -10   8   2  146.39    6.37
  -9 -10  -2    0.25    1.77
 -10   9  -2    0.51    1.36
 -10   9   2    2.02    1.37
  -9 -10   2    1.01    1.80
 -10 -10  -2   83.03    5.17
 -10  10  -2   86.88    4.46
 -10  10   2   79.16    4.26
 -10 -10   2   88.76    5.21
 -11 -10  -2   -0.80    2.02
 -10  11  -2    0.65    1.46
 -10  11   2    0.60    1.48
 -11 -10   2    0.65    2.13
 -11  -9  -2   98.63    5.77
  -9  11  -2  101.06    4.84
 -11  -9   2  109.43    5.94
  -9  11   2  100.95    4.91
 -11  -8  -2    0.81    1.91
  -8  11  -2   -0.15    1.22
 -11  -8   2    2.04    1.85
  -8  11   2    1.27    1.23
 -11  -7  -2   76.51    4.56
  -7  11  -2   67.90    3.63
  -7  11   2   73.32    3.79
 -11  -7   2   85.06    4.76
  -6  11  -2    2.30    1.11
 -11  -6  -2    0.54    1.60
 -11  -6   2    3.22    1.75
  -6  11   2    3.01    1.13
 -11  -5  -2   59.18    3.87
  -5  11  -2   59.98    3.08
  -5  11   2   53.45    2.92
 -11  -5   2   62.31    3.85
  -4  11  -2    0.28    0.84
 -11  -4  -2    2.32    1.55
 -11  -4   2    0.65    0.98
 -11  -4   2    1.87    1.49
  -4  11   2    0.86    0.82
  -3  11  -2   28.60    1.89
 -11  -3  -2   31.78    2.67
 -11  -3  -2   27.17    2.14
 -11  -3   2   27.94    2.11
 -11  -3   2   28.32    2.65
  -3  11   2   27.95    1.83
 -11  -2  -2    7.18    1.25
  -2  11  -2    5.20    0.94
 -11  -2  -2    8.70    1.68
 -11  -2   2    5.77    1.44
  -2  11   2    6.45    0.93
 -11  -2   2    6.49    1.32
  -1  11  -2    1.98    1.04
 -11  -1  -2    3.74    1.37
  -1  11  -2    2.17    0.75
 -11  -1  -2    2.29    1.07
 -11  -1   2    3.46    1.18
 -11  -1   2    4.68    1.33
   1 -11   2    4.17    1.03
  -1  11   2    1.23    0.72
   0  11  -2    6.77    1.17
   0  11  -2    6.89    0.91
 -11   0  -2   10.16    1.55
 -11   0   2    7.85    1.43
   0 -11   2    7.01    1.16
 -11   0   2    8.04    1.41
   0  11   2    7.15    0.87
   1  11  -2    2.74    0.73
 -11   1  -2    4.50    1.25
  -1 -11  -2    4.75    1.07
 -11   1  -2    3.78    1.25
 -11   1   2    2.94    1.23
  -1 -11   2    2.22    0.78
  -1 -11   2    0.48    0.86
 -11   1   2    1.27    1.13
 -11   2  -2    5.60    1.27
  -2 -11  -2    4.34    1.13
 -11   2   2    6.00    1.24
 -11   2   2    6.10    1.38
  -2 -11   2    4.42    1.17
  -3 -11  -2   27.19    2.22
 -11   3  -2   29.02    2.23
 -11   3  -2   27.79    2.16
  -3 -11   2   24.10    2.24
 -11   3   2   29.08    2.10
 -11   3   2   33.39    2.58
  -4 -11  -2    1.64    1.21
 -11   4  -2    1.26    1.02
 -11   4  -2    1.37    1.24
  -4 -11   2    2.06    1.28
 -11   4   2   -0.90    1.17
 -11   5  -2   54.71    3.27
  -5 -11  -2   56.00    3.36
  -5 -11   2   61.99    3.60
 -11   5   2   56.08    3.39
 -11   6  -2    2.46    1.40
  -6 -11  -2    2.58    1.54
  -6 -11   2    1.13    1.52
 -11   6   2    2.53    1.42
 -11   7  -2   74.11    4.12
  -7 -11  -2   82.06    4.56
 -11   7   2   71.02    3.93
  -7 -11   2   71.11    4.30
 -11   8  -2   -0.20    1.42
  -8 -11  -2    0.06    1.68
  -8 -11   2   -0.39    1.70
 -11   8   2   -0.54    1.35
 -11   9  -2  113.44    5.30
  -9 -11  -2  103.87    5.79
  -9 -11   2  105.89    5.74
 -11   9   2   99.14    5.04
 -10 -11  -2    1.00    2.09
 -11  10  -2    3.75    1.60
 -11  10   2    1.53    1.56
 -10 -11   2   -2.70    2.09
 -11 -11  -2   63.15    4.90
 -11  11  -2   59.53    3.99
 -11  11   2   67.37    4.26
 -11 -11   2   68.69    5.13
 -11  12  -2    2.19    1.82
 -12 -11  -2    1.43    2.51
 -11  12   2   -1.13    1.65
 -12 -11   2   -0.78    2.49
 -12 -10  -2   89.58    5.75
 -10  12  -2   77.49    4.59
 -12 -10   2   81.65    5.54
 -10  12   2   77.17    4.43
 -12  -9  -2    4.08    2.30
  -9  12  -2    0.15    1.46
 -12  -9   2    1.88    2.31
  -9  12   2    2.81    1.50
 -12  -8  -2  156.54    7.42
  -8  12  -2  138.83    6.30
 -12  -8   2  127.69    6.67
  -8  12   2  139.61    5.94
  -7  12  -2    0.75    1.27
 -12  -7  -2    2.16    1.99
  -7  12   2   -0.13    1.17
 -12  -7   2    1.77    1.97
  -6  12  -2   52.20    3.10
 -12  -6  -2   56.28    4.13
  -6  12   2   45.20    2.78
 -12  -6   2   45.80    3.67
 -12  -5  -2   21.77    2.70
  -5  12  -2   24.03    1.93
 -12  -5   2   22.79    2.55
  -5  12   2   20.90    1.81
  -4  12  -2   43.48    2.59
 -12  -4  -2   44.16    3.60
 -12  -4   2   42.29    3.39
  -4  12   2   38.41    2.38
 -12  -3  -2    5.94    1.81
  -3  12  -2    2.93    0.96
  -3  12   2    2.74    0.94
 -12  -3   2    4.90    1.71
 -12  -3   2    4.97    1.29
 -12  -2  -2   15.50    2.10
  -2  12  -2   10.47    1.22
 -12  -2  -2   13.06    1.60
 -12  -2   2   14.09    1.69
  -2  12   2   11.42    1.24
 -12  -2   2   14.12    2.00
  -1  12  -2   28.27    1.91
 -12  -1  -2   32.48    2.55
 -12  -1   2   26.43    2.25
 -12  -1   2   29.55    2.73
   0  12  -2   -0.25    0.72
 -12   0  -2    2.17    1.23
 -12   0  -2    3.30    1.48
 -12   0   2    2.58    1.32
 -12   0   2    2.57    1.32
 -12   1  -2   31.07    2.49
 -12   1  -2   28.52    2.52
  -1 -12   2   26.51    2.16
 -12   1   2   31.65    2.60
 -12   1   2   26.55    2.39
 -12   2  -2   15.79    1.81
  -2 -12  -2   13.85    1.62
 -12   2  -2   14.56    1.82
  -2 -12   2   10.84    1.57
 -12   2   2   10.30    1.51
 -12   2   2   11.85    1.72
  -3 -12  -2    2.18    1.26
 -12   3  -2    3.59    1.28
 -12   3  -2    3.59    1.44
 -12   3   2    2.62    1.45
  -3 -12   2    2.23    1.29
  -4 -12  -2   38.61    2.85
 -12   4  -2   37.07    3.03
 -12   4   2   43.09    3.05
  -4 -12   2   37.65    2.96
  -5 -12  -2   24.30    2.43
 -12   5  -2   21.63    2.27
 -12   5   2   22.26    2.26
  -5 -12   2   16.68    2.18
 -12   6  -2   53.50    3.45
  -6 -12  -2   48.82    3.66
 -12   6   2   51.81    3.44
  -6 -12   2   47.73    3.61
  -7 -12  -2    1.88    1.74
 -12   7  -2    2.63    1.62
  -7 -12   2    4.06    1.87
 -12   7   2    1.64    1.59
 -12   8  -2  146.37    6.59
  -8 -12  -2  145.78    7.10
 -12   8   2  140.90    6.55
  -8 -12   2  144.26    7.00
 -12   9  -2    4.25    1.81
  -9 -12  -2    2.87    2.15
 -12   9   2    3.35    1.73
  -9 -12   2    2.64    2.24
 -10 -12  -2   74.44    5.33
 -12  10  -2   74.70    4.51
 -10 -12   2   82.70    5.58
 -12  10   2   81.03    4.81
 -11 -12  -2    1.64    2.46
 -12  11  -2    1.24    1.94
 -11 -12   2    1.07    2.41
 -12  11   2    0.26    1.77
 -10  13  -2    1.40    1.74
 -10  13   2    0.14    1.55
  -9  13  -2   97.34    5.07
 -13  -9  -2  108.88    6.37
  -9  13   2   89.22    4.73
 -13  -9   2  102.13    6.16
  -8  13  -2    7.58    1.67
 -13  -8  -2    5.28    2.54
 -13  -8   2    5.30    2.34
  -8  13   2    5.33    1.55
 -13  -7  -2   92.76    5.64
  -7  13  -2   87.73    4.43
  -7  13   2   81.54    4.23
 -13  -7   2   91.80    5.41
 -13  -6  -2   13.15    2.52
  -6  13  -2    5.96    1.44
 -13  -6   2   10.12    2.30
  -6  13   2    4.96    1.34
  -5  13  -2   70.41    3.71
 -13  -5  -2   81.13    4.93
 -13  -5   2   81.98    4.87
  -5  13   2   73.24    3.76
 -13  -4  -2   23.54    2.81
  -4  13  -2   23.12    1.95
  -4  13   2   17.21    1.63
 -13  -3  -2   58.35    4.05
  -3  13  -2   52.14    2.92
 -13  -3   2   46.00    3.59
  -3  13   2   45.98    2.59
 -13  -2  -2   27.29    2.80
  -2  13  -2   24.53    1.99
 -13  -2   2   19.72    2.44
 -13  -2   2   18.34    2.00
 -13  -1  -2    8.15    1.87
 -13  -1  -2    5.58    1.55
 -13  -1   2    6.12    1.69
 -13  -1   2    8.92    1.68
 -13   0  -2   12.63    1.78
 -13   0  -2   10.85    1.94
 -13   0   2   11.57    1.83
 -13   0   2   12.70    1.89
 -13   1  -2    6.59    1.60
 -13   1  -2    5.90    1.64
 -13   1   2    7.07    1.56
 -13   1   2    5.19    1.67
 -13   2  -2   24.73    2.25
 -13   2  -2   19.73    2.23
 -13   2   2   24.32    2.44
  -2 -13   2   18.69    2.02
 -13   2   2   24.44    3.35
 -13   3  -2   46.29    3.26
  -3 -13   2   48.60    3.24
 -13   3   2   52.55    3.58
  -4 -13  -2   19.70    2.20
 -13   4  -2   19.72    2.24
 -13   4   2   19.41    2.35
  -4 -13   2   21.01    2.31
  -5 -13  -2   85.40    4.65
 -13   5  -2   80.39    4.53
  -5 -13   2   74.24    4.30
 -13   5   2   75.58    4.34
 -13   6  -2    4.43    1.79
  -6 -13  -2    6.68    1.99
 -13   6   2    3.14    1.83
  -6 -13   2    9.80    2.11
 -13   7  -2   82.23    4.73
  -7 -13  -2   88.56    5.17
  -7 -13   2   88.55    5.18
 -13   7   2   90.07    5.06
  -8 -13  -2   10.36    2.44
 -13   8  -2    4.43    1.93
 -13   8   2    7.72    2.08
  -8 -13   2   11.65    2.56
 -13   9  -2  105.06    5.63
  -9 -13  -2  100.22    6.06
 -13   9   2  107.75    5.55
  -9 -13   2   96.03    5.94
 -10 -13  -2   -1.25    2.30
 -10 -13   2   -1.13    2.31
 -14  -8  -2   78.77    5.76
  -8  14  -2   72.84    4.20
  -8  14   2   85.16    4.51
 -14  -8   2   82.78    5.58
 -14  -7  -2    2.84    2.43
  -7  14  -2    2.09    1.46
 -14  -7   2    1.27    2.22
  -7  14   2    0.39    1.31
 -14  -6  -2   66.30    4.94
  -6  14  -2   57.02    3.55
 -14  -6   2   56.23    4.57
  -6  14   2   54.26    3.33
 -14  -5  -2   18.78    2.90
  -5  14  -2   20.03    2.00
 -14  -5   2   22.75    2.95
  -5  14   2   19.04    1.91
  -4  14  -2   44.19    2.90
 -14  -4  -2   47.61    4.05
 -14  -4   2   49.75    4.07
 -14  -3  -2    5.49    2.12
  -3  14  -2    8.75    1.43
 -14  -3   2   14.19    2.42
 -14  -2  -2   12.09    2.29
 -14  -2   2    8.38    1.74
 -14  -2   2    4.85    1.94
 -14  -1  -2   47.26    3.76
 -14  -1  -2   33.44    2.79
 -14  -1   2   26.87    2.54
 -14  -1   2   31.06    2.85
 -14   0  -2    1.61    1.69
 -14   0  -2    3.24    1.58
 -14   0   2    1.92    1.67
 -14   0   2    5.26    1.68
 -14   1  -2   25.84    2.55
 -14   1  -2   31.89    2.81
 -14   1   2   36.11    3.01
 -14   1   2   35.17    2.99
 -14   2  -2    6.35    1.86
 -14   2  -2    5.84    1.92
 -14   2   2    9.32    2.10
 -14   3  -2    7.19    1.88
 -14   3   2   11.93    2.10
 -14   4  -2   46.32    3.73
 -14   4   2   44.81    3.55
  -4 -14   2   40.36    3.32
 -14   5  -2   17.59    2.49
  -5 -14   2   12.72    2.24
 -14   5   2   16.84    2.40
 -14   6  -2   50.66    4.04
  -6 -14  -2   56.68    4.23
  -6 -14   2   51.07    4.07
 -14   6   2   48.88    4.00
 -14   7  -2    0.60    1.91
  -7 -14  -2    0.49    1.97
 -14   7   2    1.03    1.99
  -7 -14   2   -2.63    1.85
  -8 -14  -2   80.27    5.29
 -14   8  -2   78.08    4.97
  -8 -14   2   70.29    5.15
 -14   8   2   70.88    4.69
 -15  -6  -2   13.18    2.96
  -6  15  -2   13.03    1.91
 -15  -6   2   15.45    2.95
 -15  -5  -2   12.71    2.92
  -5  15  -2   16.25    1.95
 -15  -5   2   14.48    2.76
 -15  -4  -2   20.38    2.95
 -15  -4   2   29.35    3.26
 -15  -3  -2    9.88    2.51
 -15  -3   2   11.37    2.44
 -15  -2  -2   11.47    2.45
 -15  -2   2   13.33    2.49
 -15  -1  -2    2.48    1.95
 -15  -1   2    1.62    1.87
 -15  -1   2    5.96    1.82
 -15   0  -2   38.65    3.19
 -15   0  -2   42.07    3.59
 -15   0   2   43.06    3.57
 -15   0   2   36.19    3.14
 -15   1  -2    4.11    1.91
 -15   1  -2   -0.02    1.70
 -15   1   2    2.53    1.87
 -15   2  -2   12.04    2.23
 -15   2   2   12.31    2.38
 -15   3  -2    4.64    1.98
 -15   3   2    9.53    2.28
 -15   4  -2   23.68    2.81
 -15   4   2   19.33    2.71
 -15   5  -2   13.62    2.50
 -15   5   2    9.21    2.33
 -15   6  -2   10.40    2.42
  -6 -15   2   17.17    2.80
 -15   6   2   11.97    2.52
 -16  -3  -2   31.24    3.62
 -16  -3   2   33.74    3.59
 -16  -2  -2    8.24    2.49
 -16  -2   2    6.12    2.36
 -16  -1  -2   42.52    4.02
 -16  -1   2   53.07    4.27
 -16   0  -2   -0.73    1.93
 -16   0   2   -0.49    1.81
 -16   1  -2   48.88    3.83
 -16   1   2   46.37    3.74
 -16   2  -2    0.50    1.94
 -16   2   2    5.06    2.18
 -16   3  -2   32.13    3.27
 -16   3   2   31.39    3.37
   0   0  -3   -0.03    0.09
   0   0   3   -0.01    0.05
   1  -1  -3   64.09    2.23
   1  -1  -3   59.83    2.22
  -1  -1  -3   62.65    2.32
  -1  -1  -3   59.23    2.18
   1   1   3   55.38    1.94
  -1  -1   3   61.39    2.03
  -1   1   3   49.35    2.02
  -1   1   3   51.40    1.97
  -1   2  -3   35.12    1.42
  -2  -1  -3   34.74    1.48
  -2  -1  -3   32.09    1.26
  -1   2   3   41.35    1.51
   2   1   3   32.04    1.38
  -2  -1   3   38.62    1.53
  -2  -1   3   38.79    1.62
   1  -2   3   39.97    1.51
  -2   0  -3  312.21   11.47
   0  -2  -3  343.11   11.48
   0   2  -3  330.13   11.58
  -2   0  -3  317.03   11.58
   0   2   3  334.57   11.22
   0  -2   3  330.21   11.35
   0  -2   3  331.05   11.26
  -2   0   3  316.88   11.31
   2   0   3  284.10   11.23
  -2   0   3  317.18   11.30
  -1  -2  -3   41.50    1.61
  -2   1  -3   39.02    1.63
  -2   1  -3   36.93    1.53
  -1  -2   3   35.23    1.37
  -2   1   3   36.62    1.37
  -2   1   3   35.48    1.46
  -1  -2   3   32.42    1.50
   2  -1   3   33.29    1.39
  -2   2  -3    0.91    0.29
  -2   2  -3    1.53    0.36
  -2  -2  -3    0.94    0.42
   2  -2   3    0.09    0.28
  -2  -2   3    0.60    0.28
  -2   2   3    0.98    0.33
  -2  -2   3    1.23    0.44
  -3  -2  -3  233.24    8.20
  -2   3  -3  235.98    8.35
  -3  -2  -3  221.79    8.44
  -2   3  -3  238.32    8.34
  -2   3   3  288.26    9.94
  -3  -2   3  250.29   10.04
  -3  -2   3  285.26    9.92
   2  -3   3  288.91    9.94
  -3  -1  -3  111.56    4.28
  -1   3  -3  123.40    4.41
  -3  -1  -3  122.30    4.49
  -1   3  -3  119.50    4.35
  -1   3   3  108.26    3.89
   1  -3   3  111.78    3.93
   1  -3   3  109.04    3.98
  -3  -1   3   98.19    4.01
  -3  -1   3  104.95    3.95
  -3   0  -3    8.10    0.76
  -3   0  -3    9.75    0.61
   0  -3  -3   10.32    0.60
  -3   0   3    9.05    0.71
  -3   0   3   10.21    0.76
   0  -3   3    9.73    0.64
   0   3   3    9.87    0.53
   0  -3   3   10.20    0.75
  -3   1  -3  107.42    4.11
  -1  -3  -3  113.36    3.88
  -1  -3  -3  109.55    4.06
  -3   1  -3  106.94    4.02
  -1  -3   3  121.79    4.43
  -1  -3   3  113.99    4.58
  -3   1   3  119.00    4.53
  -3   1   3  128.80    4.47
   1   3   3  127.92    4.33
   1   3   3  121.65    4.33
  -2  -3  -3  284.17   10.13
  -3   2  -3  291.26   10.10
  -3   2  -3  269.17   10.05
   3  -2   3  220.76    8.32
  -3   2   3  251.94    8.23
  -2  -3   3  214.53    8.45
  -3   2   3  236.46    8.37
  -2  -3   3  235.38    8.27
  -3   3  -3  172.80    6.32
  -3  -3  -3  171.88    6.43
  -3   3  -3  174.45    6.32
   3  -3   3  167.54    5.91
  -3   3   3  166.18    5.92
  -3  -3   3  165.24    5.83
  -3  -3   3  144.87    6.01
  -3   4  -3  133.66    5.02
  -4  -3  -3  130.54    5.17
  -3   4  -3  134.95    5.00
  -4  -3  -3  138.62    4.84
  -4  -3   3  113.15    4.52
  -3   4   3  114.58    4.33
  -4  -3   3  116.39    4.28
   3  -4   3  114.64    4.34
  -2   4  -3   47.67    2.05
  -2   4  -3   50.85    2.07
  -4  -2  -3   53.97    2.28
  -4  -2  -3   49.72    1.95
  -4  -2   3   50.99    2.11
  -2   4   3   52.23    2.08
   2  -4   3   52.78    2.11
  -4  -2   3   48.12    2.25
  -1   4  -3  143.86    5.08
   1  -4  -3  145.49    4.97
  -4  -1  -3  131.00    5.02
  -4  -1  -3  127.17    5.21
  -1   4  -3  144.70    5.15
  -4  -1   3  134.59    5.22
   1  -4   3  142.61    5.24
   1  -4   3  142.31    5.17
  -4  -1   3  141.37    5.31
  -1   4   3  145.06    5.14
  -4   0  -3  105.37    4.25
   0  -4  -3  116.32    4.10
  -4   0  -3  112.11    4.13
  -4   0   3  104.67    4.30
   0  -4   3  118.23    4.22
   0  -4   3  117.96    4.36
  -4   0   3  113.38    4.32
   0   4   3  119.72    4.16
  -1  -4  -3  145.87    5.29
  -4   1  -3  141.90    5.35
  -4   1  -3  142.47    5.27
  -1  -4   3  141.75    5.11
   1   4   3  143.85    5.02
  -1  -4   3  137.32    5.30
  -4   1   3  138.83    5.17
  -4   1   3  142.68    5.25
  -2  -4  -3   51.70    2.28
  -4   2  -3   53.40    2.22
  -4   2  -3   56.92    2.29
  -2  -4   3   48.63    1.99
  -4   2   3   52.40    2.01
  -4   2   3   52.35    2.18
  -2  -4   3   50.43    2.27
  -4   3  -3  114.45    4.42
  -3  -4  -3  117.67    4.54
  -4   3  -3  117.93    4.42
  -3  -4   3  133.31    4.83
  -3  -4   3  121.14    5.10
  -4   3   3  136.57    4.76
  -4   3   3  137.39    5.00
  -4   4  -3   66.13    2.80
  -4  -4  -3   70.87    3.02
  -4   4  -3   68.60    2.76
  -4  -4   3   66.80    2.66
  -4   4   3   69.54    2.82
  -4  -4   3   68.81    3.02
  -5  -4  -3  303.62   10.64
  -4   5  -3  297.64   10.90
  -5  -4  -3  289.44   11.11
  -4   5  -3  311.44   10.85
  -4   5   3  264.49    9.70
  -5  -4   3  270.28    9.60
  -5  -4   3  264.02    9.93
  -3   5  -3   74.88    2.94
  -5  -3  -3   70.92    2.77
  -3   5  -3   72.68    2.88
  -5  -3  -3   72.61    3.18
  -5  -3   3   88.92    3.36
  -5  -3   3   80.42    3.57
   3  -5   3   87.10    3.38
  -3   5   3   85.45    3.36
  -2   5  -3  143.63    5.29
  -5  -2  -3  133.39    5.49
  -5  -2  -3  145.62    5.22
  -2   5  -3  147.24    5.32
  -2   5   3  155.94    5.55
   2  -5   3  153.84    5.59
  -5  -2   3  137.13    5.73
   2  -5   3  151.51    5.57
  -5  -2   3  153.21    5.61
  -1   5  -3   96.09    3.65
  -5  -1  -3   86.99    3.84
  -5  -1  -3   98.50    3.66
  -1   5  -3  102.58    3.76
   1  -5  -3   98.87    3.57
   1  -5   3   87.02    3.37
  -1   5   3   91.49    3.34
  -5  -1   3   88.90    3.57
  -5  -1   3   84.24    3.47
   1  -5   3   90.00    3.46
  -5   0  -3   27.90    1.58
   0  -5  -3   31.40    1.36
  -5   0  -3   28.63    1.38
   0   5  -3   28.93    1.31
  -5   0   3   30.07    1.55
   0  -5   3   30.38    1.54
  -5   0   3   31.29    1.53
   0  -5   3   29.91    1.39
   0   5   3   31.26    1.29
  -1  -5  -3   89.67    3.41
  -5   1  -3   81.81    3.47
  -5   1  -3   90.50    3.41
  -1  -5   3   96.56    3.64
  -5   1   3   96.87    3.74
  -5   1   3   97.91    3.83
  -1  -5   3   99.17    3.87
   1   5   3   97.77    3.54
  -2  -5  -3  160.84    6.01
  -5   2  -3  158.82    5.99
  -5   2  -3  160.66    5.96
  -5   2   3  145.08    5.31
  -5   2   3  149.12    5.47
  -2  -5   3  150.28    5.27
  -2  -5   3  137.73    5.53
   2   5   3  139.99    5.12
  -5   3  -3   86.91    3.49
  -3  -5  -3   86.80    3.58
  -5   3  -3   88.11    3.47
  -3  -5   3   65.54    3.06
  -3  -5   3   72.16    2.75
  -5   3   3   75.42    2.98
  -5   3   3   71.32    2.72
  -4  -5  -3  270.76   10.28
  -5   4  -3  275.51   10.14
  -5   4  -3  287.55   10.09
  -5   4   3  295.46   10.74
  -5   4   3  298.91   10.45
  -4  -5   3  308.78   10.55
  -4  -5   3  275.13   10.88
  -5   5  -3   49.20    2.33
  -5  -5  -3   49.87    2.60
  -5   5  -3   52.50    2.24
  -5  -5   3   44.64    2.48
  -5   5   3   46.49    2.20
  -5  -5   3   48.80    2.01
  -6  -5  -3  114.44    5.13
  -5   6  -3  132.31    4.78
  -6  -5  -3  126.55    4.53
  -5   6  -3  124.02    4.91
  -5   6   3  147.76    5.50
  -6  -5   3  130.96    5.71
  -6  -5   3  145.63    5.32
  -6  -4  -3  149.19    5.47
  -4   6  -3  150.45    5.60
  -6  -4  -3  152.35    6.01
  -4   6  -3  147.43    5.70
  -6  -4   3  151.51    6.48
  -6  -4   3  173.80    6.19
  -4   6   3  171.46    6.26
  -3   6  -3   50.48    2.07
  -3   6  -3   47.96    2.12
  -6  -3  -3   44.91    1.99
  -6  -3  -3   44.40    2.38
   3  -6   3   52.28    2.27
  -3   6   3   54.02    2.24
  -6  -3   3   45.37    2.50
  -6  -3   3   52.27    2.29
  -2   6  -3   72.23    2.90
  -6  -2  -3   69.59    3.15
  -2   6  -3   75.14    2.91
  -6  -2  -3   71.47    2.84
   2  -6  -3   71.10    2.68
   2  -6   3   73.07    2.89
  -2   6   3   72.07    2.83
  -2   6   3   71.90    2.65
  -6  -2   3   63.27    3.08
   2  -6   3   73.01    2.87
  -6  -2   3   68.59    2.94
   1  -6  -3   72.12    2.74
  -1   6  -3   70.56    2.80
  -6  -1  -3   71.56    2.85
  -6  -1  -3   66.07    3.06
  -1   6  -3   73.54    2.93
   1  -6   3   81.78    3.29
  -6  -1   3   80.20    3.33
  -6  -1   3   80.50    3.42
   1  -6   3   81.48    3.20
  -1   6   3   85.05    3.15
   0  -6  -3  179.65    6.45
   0   6  -3  174.26    6.41
  -6   0  -3  178.31    6.50
  -6   0  -3  170.39    6.65
   0  -6   3  171.62    6.39
  -6   0   3  181.32    6.61
   0   6   3  175.95    6.33
  -6   0   3  173.05    6.57
   0  -6   3  174.09    6.56
  -6   1  -3   87.78    3.31
  -1  -6  -3   83.27    3.27
  -6   1  -3   73.04    3.34
  -6   1   3   68.36    2.94
  -6   1   3   76.34    3.08
  -1  -6   3   74.86    3.07
  -1  -6   3   71.71    2.81
   1   6   3   70.70    2.69
  -2  -6  -3   74.88    3.06
  -6   2  -3   73.44    3.04
  -6   2  -3   67.96    3.00
  -6   2   3   70.53    3.08
  -6   2   3   75.56    2.94
  -2  -6   3   74.03    3.18
  -2  -6   3   74.57    2.84
   2   6   3   71.61    2.68
  -6   3  -3   57.97    2.48
  -6   3  -3   54.20    2.49
  -3  -6  -3   54.38    2.57
  -6   3   3   48.88    2.03
  -3  -6   3   46.57    2.38
  -3  -6   3   49.25    2.00
  -6   3   3   47.88    2.30
  -4  -6  -3  173.65    6.75
  -6   4  -3  176.29    6.53
  -6   4  -3  171.64    6.58
  -6   4   3  142.54    5.72
  -4  -6   3  153.56    5.48
  -4  -6   3  152.58    5.94
  -6   4   3  145.83    5.42
  -6   5  -3  155.33    5.69
  -5  -6  -3  148.54    6.03
  -6   5  -3  144.08    5.78
  -5  -6   3  114.78    5.05
  -6   5   3  127.04    4.47
  -5  -6   3  124.27    4.60
  -6   5   3  121.70    4.86
  -6   6  -3   18.95    1.53
  -6  -6  -3   17.03    1.74
  -6   6  -3   20.43    1.34
  -6  -6   3   18.24    1.17
  -6   6   3   16.54    1.32
  -6  -6   3   14.52    1.51
  -7  -6  -3   51.02    2.98
  -6   7  -3   54.56    2.39
  -6   7  -3   51.59    2.62
  -7  -6   3   52.31    2.28
  -6   7   3   50.81    2.54
  -7  -6   3   45.89    2.84
  -5   7  -3  129.00    4.77
  -7  -5  -3  124.13    4.60
  -7  -5  -3  115.06    5.23
  -5   7  -3  127.85    4.96
  -7  -5   3  114.40    4.25
  -7  -5   3   99.54    4.66
  -5   7   3  107.73    4.35
  -7  -4  -3   50.50    2.11
  -4   7  -3   49.45    2.32
  -4   7  -3   46.70    2.14
  -7  -4  -3   49.46    2.73
  -4   7   3   71.75    2.96
  -7  -4   3   65.73    2.93
  -7  -4   3   68.56    3.31
  -7  -3  -3   73.72    2.88
  -3   7  -3   71.23    2.87
  -7  -3  -3   65.91    3.25
  -3   7  -3   68.78    2.93
  -3   7   3   62.32    2.68
  -7  -3   3   62.10    2.76
  -7  -3   3   65.64    3.11
  -2   7  -3  108.33    4.13
  -2   7  -3  105.40    4.10
  -7  -2  -3  109.52    4.46
   2  -7  -3  102.65    3.90
  -7  -2  -3  102.55    4.08
  -7  -2   3  115.53    4.61
  -2   7   3  123.76    4.48
   2  -7   3  117.44    4.53
  -7  -2   3  105.35    4.73
  -2   7   3  120.54    4.32
   2  -7   3  117.93    4.50
  -7  -1  -3  147.68    5.63
  -7  -1  -3  126.63    5.30
  -1   7  -3  146.33    5.42
   1  -7  -3  137.08    5.21
  -1   7  -3  148.41    5.30
   1  -7   3  162.30    6.09
  -7  -1   3  164.41    6.26
  -7  -1   3  154.13    6.12
  -1   7   3  162.10    5.94
   1  -7   3  162.65    6.00
  -7   0  -3  129.69    4.94
  -7   0  -3  126.10    5.09
   0  -7  -3  131.08    4.87
   0   7  -3  125.63    4.80
  -7   0   3  124.65    4.90
   0  -7   3  121.50    4.84
   0   7   3  123.70    4.59
  -7   0   3  128.16    4.90
   0  -7   3  123.18    4.67
  -1  -7  -3  157.81    5.89
  -7   1  -3  149.92    6.01
   1   7  -3  156.43    5.73
  -7   1  -3  158.60    5.92
  -1  -7   3  146.86    5.62
  -7   1   3  145.89    5.61
   1   7   3  141.56    5.23
  -7   1   3  144.66    5.53
  -1  -7   3  142.23    5.34
  -7   2  -3  108.94    4.65
  -7   2  -3  121.40    4.67
  -2  -7  -3  124.44    4.71
  -2  -7   3  103.08    3.94
  -2  -7   3  104.54    4.30
  -7   2   3  106.79    4.26
  -7   2   3  105.43    4.08
   2   7   3  102.20    3.80
  -7   3  -3   70.00    2.96
  -3  -7  -3   67.33    3.08
  -7   3  -3   64.18    2.97
   3   7   3   66.62    2.62
  -3  -7   3   73.26    2.83
  -7   3   3   77.33    3.21
  -7   3   3   73.46    2.91
  -3  -7   3   70.56    3.28
  -7   4  -3   69.66    3.04
  -4  -7  -3   71.80    3.33
  -7   4  -3   73.69    3.20
  -4  -7   3   50.56    2.09
  -7   4   3   50.76    2.49
  -4  -7   3   47.14    2.62
  -7   4   3   47.89    2.09
  -7   5  -3  113.42    4.66
  -5  -7  -3  110.17    4.84
  -7   5  -3  117.44    4.52
  -5  -7   3  125.82    4.75
  -5  -7   3  133.15    5.37
  -7   5   3  127.55    5.09
  -7   5   3  121.30    4.67
  -7   6  -3   54.84    2.77
  -6  -7  -3   56.39    3.11
  -7   6  -3   56.54    2.56
  -6  -7   3   52.40    2.96
  -7   6   3   49.67    2.61
  -6  -7   3   50.98    2.23
  -7  -7  -3   47.74    3.00
  -7   7  -3   48.44    2.62
  -7   7  -3   48.16    2.38
  -7  -7   3   46.47    2.10
  -7  -7   3   39.98    2.77
  -7   7   3   44.21    2.44
  -8  -7  -3   45.98    3.12
  -7   8  -3   40.81    2.52
  -8  -7   3   47.36    3.11
  -7   8   3   45.55    2.62
  -8  -6  -3   48.67    3.07
  -6   8  -3   49.89    2.62
  -8  -6   3   46.18    2.36
  -8  -6   3   52.34    3.13
  -6   8   3   50.47    2.57
  -8  -5  -3   98.10    4.40
  -5   8  -3   90.00    3.65
  -8  -5  -3   89.49    3.61
  -5   8  -3   89.40    3.89
  -8  -5   3   88.59    3.59
  -5   8   3   87.99    3.63
  -8  -5   3   75.95    4.00
  -4   8  -3  121.42    4.56
  -8  -4  -3  120.23    4.56
  -8  -4  -3  107.90    5.07
  -4   8  -3  120.63    4.72
  -8  -4   3  118.47    4.76
  -4   8   3  119.92    4.71
  -8  -4   3  118.64    5.17
  -8  -3  -3  192.49    7.38
  -8  -3  -3  192.42    7.80
  -3   8  -3  201.19    7.39
  -3   8  -3  209.98    7.47
  -8  -3   3  183.95    6.83
  -3   8   3  186.04    6.72
  -8  -3   3  165.79    7.06
  -8  -2  -3  143.49    5.63
  -8  -2  -3  131.78    5.21
   2  -8  -3  131.13    5.01
  -2   8  -3  134.20    5.23
  -2   8  -3  141.04    5.22
  -8  -2   3  130.97    5.28
   2  -8   3  134.84    5.17
   2  -8   3  136.98    5.15
  -2   8   3  135.28    5.09
  -8  -2   3  124.29    5.43
  -2   8   3  138.81    4.96
  -8  -1  -3  167.24    6.22
  -1   8  -3  165.44    6.11
   1  -8  -3  164.11    6.05
  -8  -1  -3  147.93    6.40
  -1   8  -3  170.09    6.26
  -8  -1   3  174.42    6.75
  -8  -1   3  163.83    6.84
   1  -8   3  178.13    6.68
  -1   8   3  185.55    6.52
   1  -8   3  178.99    6.57
   0  -8  -3  242.36    8.81
  -8   0  -3  232.29    9.06
  -8   0  -3  243.77    8.89
   0   8  -3  241.19    8.74
   0  -8   3  234.84    8.89
  -8   0   3  245.24    8.98
   0  -8   3  238.64    8.71
  -8   0   3  237.55    8.97
   0   8   3  239.28    8.64
   1   8  -3  180.15    6.72
  -8   1  -3  173.84    6.91
  -1  -8  -3  187.04    6.91
  -8   1  -3  190.12    7.07
  -8   1   3  163.23    6.39
   1   8   3  167.89    5.99
  -1  -8   3  165.03    6.09
  -8   1   3  158.01    6.30
  -1  -8   3  167.49    6.40
  -2  -8  -3  134.30    5.38
  -8   2  -3  137.10    5.43
   2   8  -3  135.78    5.10
  -8   2  -3  139.77    5.39
  -2  -8   3  136.65    5.45
  -2  -8   3  132.92    5.04
  -8   2   3  136.30    5.24
   2   8   3  133.24    4.90
  -8   2   3  135.25    5.40
  -8   3  -3  187.85    7.23
  -8   3  -3  189.65    7.27
  -3  -8  -3  192.96    7.35
  -8   3   3  198.49    7.50
  -3  -8   3  195.84    7.59
  -8   3   3  196.35    7.25
   3   8   3  189.26    6.94
  -3  -8   3  194.50    7.10
  -4  -8  -3  120.51    5.14
  -8   4  -3  125.78    5.02
  -8   4  -3  122.81    4.91
  -4  -8   3  117.28    5.09
  -8   4   3  122.28    4.94
  -4  -8   3  121.04    4.53
  -8   4   3  119.47    4.61
  -5  -8  -3   95.31    4.30
  -8   5  -3   93.14    4.07
  -8   5  -3   91.64    3.87
  -8   5   3   89.56    3.95
  -5  -8   3   88.37    4.17
  -5  -8   3   89.47    3.49
  -6  -8  -3   51.28    3.12
  -8   6  -3   55.15    2.85
  -8   6  -3   55.08    2.59
  -6  -8   3   51.20    3.07
  -8   6   3   52.07    2.71
  -6  -8   3   46.84    2.19
  -7  -8  -3   48.39    3.14
  -8   7  -3   47.80    2.75
  -7  -8   3   36.35    2.77
  -8   7   3   40.16    2.43
  -8   8  -3    8.48    1.38
  -8   8   3    6.66    1.27
  -8  -8   3    6.59    1.65
  -9  -8  -3   27.47    2.78
  -8   9  -3   29.20    2.36
  -8   9   3   24.10    1.97
  -9  -8   3   22.28    2.47
  -7   9  -3   21.12    1.80
  -9  -7  -3   26.90    2.55
  -7   9   3   36.74    2.36
  -9  -7   3   34.56    3.00
  -6   9  -3   93.94    4.21
  -9  -6  -3  100.47    4.89
  -6   9   3   94.34    4.00
  -9  -6   3   90.19    3.82
  -9  -6   3   87.28    4.48
  -9  -5  -3   88.69    4.34
  -5   9  -3   81.44    3.72
  -9  -5   3   90.61    3.90
  -5   9   3   89.56    3.87
  -9  -5   3   91.04    4.47
  -9  -4  -3  136.07    5.65
  -4   9  -3  129.59    5.08
  -4   9  -3  125.01    4.94
  -9  -4  -3  116.69    4.91
  -4   9   3  120.19    4.80
  -9  -4   3  121.57    5.37
  -9  -4   3  119.04    4.91
  -9  -3  -3  119.47    5.14
  -9  -3  -3  104.92    4.55
  -3   9  -3  116.47    4.52
  -3   9  -3  117.67    4.61
  -3   9   3  100.97    4.11
  -9  -3   3   98.65    4.30
  -9  -3   3  107.42    4.68
  -2   9  -3   66.57    2.87
  -2   9  -3   65.67    2.83
   2  -9  -3   64.55    2.74
  -9  -2  -3   63.90    2.92
  -9  -2  -3   62.64    3.34
  -9  -2   3   58.76    2.96
   2  -9   3   64.10    2.78
  -9  -2   3   60.85    3.20
  -2   9   3   62.78    2.68
  -1   9  -3  202.76    7.52
   1  -9  -3  193.13    7.32
  -1   9  -3  204.96    7.38
  -9  -1  -3  201.90    7.51
  -9  -1  -3  187.21    7.74
   1  -9   3  205.69    7.48
  -1   9   3  204.60    7.41
   1  -9   3  198.05    7.57
  -9  -1   3  192.14    7.79
  -9  -1   3  202.82    7.70
   0   9  -3  315.47   11.32
   0  -9  -3  320.88   11.41
  -9   0  -3  306.85   11.69
  -9   0  -3  307.17   11.50
  -9   0   3  330.24   11.68
  -9   0   3  284.19   11.58
   0  -9   3  315.64   11.35
   0  -9   3  311.71   11.55
   0   9   3  326.07   11.28
  -9   1  -3  200.90    7.99
  -9   1  -3  221.49    8.19
  -1  -9  -3  213.53    7.97
   1   9  -3  210.04    7.76
   1   9   3  200.67    7.28
  -9   1   3  198.53    7.66
  -1  -9   3  199.21    7.69
  -9   1   3  207.28    7.74
  -1  -9   3  196.33    7.38
  -9   2  -3   66.66    3.15
  -2  -9  -3   65.73    3.07
   2   9  -3   63.81    2.71
  -9   2  -3   66.71    3.13
  -2  -9   3   63.99    2.71
  -2  -9   3   67.72    3.17
  -9   2   3   68.22    3.26
   2   9   3   63.29    2.55
  -9   2   3   65.24    2.98
  -9   3  -3  107.95    4.55
  -3  -9  -3  109.38    4.61
   3   9  -3  107.69    4.17
  -9   3  -3  110.92    4.60
  -9   3   3  111.36    4.56
  -9   3   3  115.62    4.85
  -3  -9   3  113.97    4.89
  -3  -9   3  115.96    4.37
  -9   4  -3  128.08    5.08
  -9   4  -3  121.49    5.16
  -4  -9  -3  125.30    5.31
  -4  -9   3  123.78    4.81
  -9   4   3  128.82    4.98
  -4  -9   3  130.93    5.48
  -9   4   3  127.19    5.32
  -5  -9  -3   88.42    4.41
  -9   5  -3  103.56    4.34
  -9   5  -3   97.26    4.07
  -9   5   3   87.11    3.98
  -5  -9   3   85.07    4.18
  -6  -9  -3  102.86    4.80
  -9   6  -3   97.08    4.47
  -9   6   3   94.16    4.28
  -6  -9   3   94.21    4.61
  -9   7  -3   41.94    2.65
  -7  -9  -3   37.11    3.02
  -9   7   3   20.74    1.84
  -7  -9   3   19.25    2.16
  -8  -9  -3   26.89    2.64
  -9   8  -3   20.92    2.01
  -9   8   3   28.22    2.35
  -9  -9  -3    9.88    2.04
  -9   9  -3    4.11    1.35
  -9  -9   3    6.46    1.93
  -9   9   3    5.23    1.41
  -9  10  -3   22.54    2.13
 -10  -9  -3   18.36    2.64
  -9  10   3   18.99    1.94
  -8  10  -3   17.24    1.79
  -8  10   3   17.13    1.78
 -10  -8   3   18.87    2.51
 -10  -7  -3   23.93    2.65
  -7  10  -3   19.15    1.85
 -10  -7   3   20.38    2.34
  -7  10   3   21.29    1.84
 -10  -6  -3   52.66    3.56
  -6  10  -3   44.56    2.73
  -6  10   3   42.43    2.56
 -10  -6   3   46.85    3.24
 -10  -5  -3   54.40    3.54
  -5  10  -3   50.07    2.74
 -10  -5   3   46.97    2.57
 -10  -5   3   45.10    3.16
  -5  10   3   48.10    2.51
  -4  10  -3   92.46    4.04
 -10  -4  -3   96.59    4.69
 -10  -4   3   90.48    4.53
 -10  -4   3   94.26    4.10
  -4  10   3   94.54    3.97
 -10  -3  -3   88.75    3.95
 -10  -3  -3   93.15    4.51
  -3  10  -3   96.86    3.94
  -3  10   3   85.28    3.54
 -10  -3   3   84.24    4.19
 -10  -3   3   79.56    3.74
  -2  10  -3   82.90    3.41
 -10  -2  -3   71.50    3.88
 -10  -2  -3   75.87    3.51
  -2  10  -3   81.72    3.42
  -2  10   3   81.57    3.36
 -10  -2   3   79.05    3.71
   2 -10   3   81.73    3.47
 -10  -2   3   78.17    3.93
 -10  -1  -3  116.60    4.87
  -1  10  -3  119.32    4.83
  -1  10  -3  118.12    4.66
 -10  -1  -3  117.03    5.16
  -1  10   3  103.87    3.93
 -10  -1   3   95.42    4.35
 -10  -1   3   92.45    4.40
   1 -10   3   98.32    4.14
   1 -10   3   99.85    4.01
   0  10  -3   97.22    4.12
   0  10  -3   99.47    3.84
 -10   0  -3   94.13    4.10
 -10   0  -3   85.71    4.25
   0 -10  -3   93.89    3.91
   0 -10   3   91.59    3.98
 -10   0   3   92.79    4.13
 -10   0   3   86.44    4.08
   0 -10   3   93.32    3.74
   0  10   3   92.76    3.62
  -1 -10  -3  103.22    4.35
   1  10  -3  104.97    4.10
 -10   1  -3  101.89    4.55
 -10   1  -3  104.33    4.47
  -1 -10   3  114.23    4.85
  -1 -10   3  119.75    4.55
 -10   1   3  120.44    4.98
   1  10   3  119.44    4.44
 -10   1   3  106.41    4.80
 -10   2  -3   82.60    3.85
  -2 -10  -3   85.95    3.79
 -10   2  -3   84.15    3.84
   2  10  -3   85.13    3.41
  -2 -10   3   81.93    3.28
 -10   2   3   76.57    3.55
  -2 -10   3   80.92    3.74
 -10   2   3   77.71    3.79
   3  10  -3   82.99    3.37
 -10   3  -3   87.47    3.91
 -10   3  -3   82.02    3.80
  -3 -10  -3   83.74    3.89
  -3 -10   3   88.20    3.68
 -10   3   3   98.04    3.99
  -3 -10   3   90.09    4.24
 -10   3   3   96.76    4.34
  -4 -10  -3  100.93    4.50
 -10   4  -3   96.84    4.23
 -10   4  -3   92.45    4.35
  -4 -10   3   89.05    4.32
 -10   4   3   93.83    4.28
 -10   5  -3   44.18    2.85
 -10   5  -3   50.33    2.60
  -5 -10  -3   50.18    3.10
 -10   5   3   52.72    3.07
  -5 -10   3   52.41    3.24
 -10   6  -3   48.88    2.99
  -6 -10  -3   49.51    3.24
  -6 -10   3   45.79    3.21
 -10   6   3   45.36    2.88
  -7 -10  -3   18.87    2.26
 -10   7  -3   18.58    1.90
 -10   7   3   22.23    2.06
  -7 -10   3   21.44    2.42
 -10   8  -3   21.39    2.04
  -8 -10  -3   15.12    2.26
 -10   8   3   13.19    1.81
  -8 -10   3   15.67    2.34
  -9 -10  -3   19.99    2.66
 -10   9  -3   21.95    2.20
  -9 -10   3   20.36    2.71
 -10   9   3   19.03    2.03
 -10 -10  -3    4.36    2.06
 -10  10  -3    2.77    1.49
 -10 -10   3    4.87    2.18
 -10  10   3    3.20    1.52
 -10  11  -3    6.31    1.67
 -11 -10  -3    9.10    2.44
 -10  11   3    7.30    1.68
 -11 -10   3    7.83    2.40
 -11  -9  -3   11.68    2.45
  -9  11  -3    6.92    1.61
  -9  11   3    5.28    1.44
 -11  -9   3    4.72    2.17
 -11  -8  -3    8.41    2.27
  -8  11  -3    8.89    1.57
  -8  11   3   15.43    1.74
 -11  -8   3   14.63    2.40
 -11  -7  -3   10.49    2.25
  -7  11  -3    7.95    1.46
  -7  11   3   11.51    1.54
 -11  -7   3   11.19    2.19
  -6  11  -3   53.36    3.01
 -11  -6  -3   58.31    3.95
 -11  -6   3   56.54    3.80
  -6  11   3   48.40    2.82
  -5  11  -3   42.45    2.57
 -11  -5  -3   43.99    3.50
  -5  11   3   45.94    2.52
 -11  -5   3   35.96    3.13
 -11  -4  -3   71.63    4.12
  -4  11  -3   69.37    3.32
 -11  -4   3   61.91    3.74
 -11  -4   3   57.31    3.13
  -4  11   3   61.98    2.93
  -3  11  -3   47.02    2.42
 -11  -3  -3   39.81    2.53
 -11  -3  -3   47.97    3.25
  -3  11   3   37.31    2.06
 -11  -3   3   33.92    2.86
 -11  -3   3   36.26    2.45
  -2  11  -3   45.72    2.33
 -11  -2  -3   40.01    3.03
 -11  -2  -3   42.42    2.60
 -11  -2   3   37.62    2.83
  -2  11   3   40.56    2.06
 -11  -2   3   35.68    2.53
 -11  -1  -3  130.24    5.67
  -1  11  -3  126.80    5.05
  -1  11  -3  130.94    5.23
 -11  -1  -3  119.88    5.29
  -1  11   3  137.87    5.08
 -11  -1   3  120.72    5.57
 -11  -1   3  126.63    5.48
   1 -11   3  132.91    5.32
 -11   0  -3  101.88    4.60
   0  11  -3   95.42    3.97
 -11   0  -3   98.22    4.34
   0  11  -3   93.53    4.26
   0 -11   3   99.90    4.00
   0 -11   3   95.05    4.22
 -11   0   3   99.58    4.47
 -11   0   3   90.93    4.41
   1  11  -3  141.03    5.42
 -11   1  -3  142.21    5.84
  -1 -11  -3  138.80    5.65
 -11   1  -3  138.30    5.95
 -11   1   3  125.99    5.41
 -11   1   3  115.90    5.17
  -1 -11   3  131.40    4.87
  -1 -11   3  119.10    5.17
 -11   2  -3   40.52    2.65
  -2 -11  -3   41.44    2.47
   2  11  -3   41.02    2.09
 -11   2  -3   35.93    2.50
 -11   2   3   43.65    2.86
 -11   2   3   46.23    2.65
  -2 -11   3   45.51    2.21
  -2 -11   3   43.20    2.65
 -11   3  -3   38.04    2.63
  -3 -11  -3   35.95    2.46
 -11   3  -3   35.72    2.43
  -3 -11   3   43.68    2.84
 -11   3   3   47.06    3.04
 -11   3   3   44.38    2.52
  -4 -11  -3   65.12    3.49
 -11   4  -3   65.03    3.47
 -11   4  -3   61.06    3.21
  -4 -11   3   69.54    3.81
 -11   4   3   71.95    3.78
  -5 -11  -3   46.94    3.16
 -11   5  -3   52.30    3.16
 -11   5   3   45.64    3.02
  -5 -11   3   43.78    3.11
 -11   6  -3   53.32    3.27
  -6 -11  -3   50.44    3.43
  -6 -11   3   48.21    3.43
 -11   6   3   48.03    3.18
  -7 -11  -3   11.29    2.02
 -11   7  -3    9.07    1.71
 -11   7   3    6.43    1.58
  -7 -11   3    7.71    1.97
  -8 -11  -3   12.68    2.32
 -11   8  -3   12.37    1.88
  -8 -11   3    7.47    2.13
 -11   8   3    8.16    1.72
 -11   9  -3    6.60    1.72
  -9 -11  -3    9.45    2.27
 -11   9   3    6.46    1.68
  -9 -11   3    2.89    2.01
 -11  10  -3    5.16    1.78
 -10 -11  -3    1.40    2.15
 -11  10   3    9.84    1.88
 -10 -11   3   10.00    2.50
 -11  11  -3    1.45    1.70
 -11 -11  -3    4.74    2.39
 -11  11   3    0.48    1.59
 -11 -11   3    0.96    2.28
 -12 -11  -3    1.58    2.41
 -11  12  -3   -0.61    1.72
 -12 -11   3    7.13    2.88
 -11  12   3    2.46    1.77
 -10  12  -3   12.28    2.15
 -12 -10  -3   19.68    3.06
 -10  12   3    7.76    1.84
 -12 -10   3    8.57    2.65
  -9  12  -3   10.80    1.90
 -12  -9  -3   10.21    2.71
  -9  12   3   10.61    1.76
  -8  12  -3   11.29    1.75
 -12  -8   3   10.72    2.48
  -8  12   3    9.38    1.60
 -12  -7  -3   28.45    3.16
  -7  12  -3   21.56    2.08
  -7  12   3   27.81    2.22
 -12  -7   3   33.73    3.18
  -6  12  -3   20.22    1.89
 -12  -6  -3   15.54    2.50
 -12  -6   3   20.40    2.65
  -6  12   3   20.50    1.85
 -12  -5  -3   58.96    4.16
  -5  12  -3   60.12    3.20
  -5  12   3   61.52    3.25
 -12  -5   3   69.69    4.24
  -4  12  -3   77.60    3.68
 -12  -4  -3   78.33    4.64
  -4  12   3   65.18    3.22
 -12  -4   3   65.28    3.80
 -12  -4   3   70.07    4.16
 -12  -3  -3   49.98    3.56
  -3  12  -3   49.17    2.69
 -12  -3   3   50.14    3.52
  -3  12   3   53.82    2.65
 -12  -3   3   49.78    3.07
  -2  12  -3   91.71    3.86
 -12  -2  -3   80.37    4.07
 -12  -2  -3   90.24    4.65
 -12  -2   3   86.27    4.20
  -2  12   3   91.16    3.77
 -12  -2   3   83.64    4.48
 -12  -1  -3   62.57    3.67
 -12  -1  -3   58.26    3.28
  -1  12  -3   56.89    2.84
 -12  -1   3   65.98    3.75
 -12  -1   3   61.16    3.56
 -12   0  -3  138.26    6.10
 -12   0  -3  128.98    5.76
   0  12  -3  140.52    5.41
 -12   0   3  125.00    5.67
 -12   0   3  132.89    5.69
   0 -12   3  127.15    5.54
 -12   1  -3   67.58    3.71
 -12   1  -3   59.19    3.45
 -12   1   3   51.31    3.11
  -1 -12   3   53.01    2.97
 -12   1   3   58.73    3.35
 -12   2  -3   98.32    4.60
 -12   2  -3   93.34    4.61
  -2 -12  -3  100.26    4.67
  -2 -12   3   90.24    4.28
 -12   2   3   92.92    4.47
 -12   2   3   88.90    4.18
  -3 -12  -3   57.59    3.26
 -12   3  -3   52.66    3.18
 -12   3  -3   56.61    3.43
 -12   3   3   50.97    3.21
  -3 -12   3   42.75    2.92
  -4 -12  -3   73.01    3.93
 -12   4  -3   73.96    3.96
  -4 -12   3   79.40    4.13
 -12   4   3   75.69    4.21
 -12   5  -3   60.88    3.68
  -5 -12  -3   65.59    3.86
  -5 -12   3   62.15    3.85
 -12   5   3   59.42    3.69
  -6 -12  -3   22.85    2.54
 -12   6  -3   18.61    2.13
 -12   6   3   18.73    2.22
  -6 -12   3   22.05    2.55
  -7 -12  -3   25.93    2.83
 -12   7  -3   28.40    2.60
 -12   7   3   23.80    2.45
  -7 -12   3   24.47    2.74
  -8 -12  -3   12.90    2.37
 -12   8  -3   19.46    2.28
 -12   8   3    9.82    1.92
  -8 -12   3   17.66    2.65
  -9 -12  -3   13.32    2.67
 -12   9  -3   19.08    2.42
  -9 -12   3   16.50    2.71
 -12   9   3   13.72    2.12
 -12  10  -3   12.74    2.23
 -10 -12  -3   10.57    2.71
 -12  10   3   12.33    2.15
 -10 -12   3   14.98    2.94
 -12  11  -3    1.50    2.27
 -11 -12  -3    7.16    2.66
 -11 -12   3   10.65    2.78
 -12  11   3    2.41    1.79
  -9  13  -3   11.21    1.98
 -13  -9  -3   18.03    3.27
 -13  -9   3   21.18    3.21
  -9  13   3   13.61    2.00
 -13  -8  -3    8.52    2.68
  -8  13  -3    7.04    1.67
  -8  13   3    7.78    1.65
 -13  -7  -3   40.33    3.79
  -7  13  -3   37.16    2.90
 -13  -7   3   36.51    3.59
  -7  13   3   30.43    2.59
  -6  13  -3   33.69    2.72
 -13  -6  -3   37.58    3.67
  -6  13   3   30.73    2.57
 -13  -6   3   38.66    3.44
  -5  13  -3   58.95    3.37
 -13  -5  -3   72.58    4.65
 -13  -5   3   58.43    4.21
  -5  13   3   57.93    3.19
  -4  13  -3   51.72    2.95
 -13  -4  -3   50.74    4.07
  -4  13   3   59.79    3.17
 -13  -4   3   63.01    4.16
 -13  -3  -3   77.42    4.49
  -3  13  -3   62.90    3.35
 -13  -3   3   62.28    3.91
 -13  -3   3   46.35    3.28
  -3  13   3   59.25    3.45
 -13  -2  -3   52.07    3.71
  -2  13  -3   51.87    2.79
 -13  -2   3   49.35    3.59
 -13  -2   3   43.88    3.10
  -1  13  -3   76.85    3.52
 -13  -1  -3   76.27    4.05
 -13  -1  -3   75.92    4.35
 -13  -1   3   84.57    4.45
 -13  -1   3   75.84    4.21
 -13   0  -3  145.25    6.47
 -13   0  -3  156.33    6.71
 -13   0   3  141.48    6.19
 -13   0   3  139.59    6.26
 -13   1  -3   78.19    4.11
 -13   1  -3   82.98    4.30
 -13   1   3   78.14    4.36
 -13   1   3   75.51    4.03
 -13   2  -3   48.81    3.28
 -13   2  -3   47.40    3.32
 -13   2   3   48.49    3.38
  -2 -13   3   47.65    3.08
 -13   3  -3   66.06    3.96
 -13   3  -3   67.28    4.10
  -3 -13   3   62.98    3.70
 -13   3   3   60.20    3.82
 -13   4  -3   56.74    3.80
  -4 -13  -3   66.76    3.79
 -13   4   3   63.20    3.86
  -4 -13   3   57.57    3.64
 -13   5  -3   63.22    4.00
  -5 -13  -3   67.53    4.07
 -13   5   3   58.45    3.94
  -5 -13   3   60.01    3.95
 -13   6  -3   31.03    2.80
  -6 -13  -3   38.34    3.43
 -13   6   3   34.65    2.93
  -6 -13   3   36.47    3.38
 -13   7  -3   38.46    3.16
  -7 -13  -3   38.69    3.50
 -13   7   3   32.71    2.99
  -7 -13   3   40.99    3.71
  -8 -13  -3   11.70    2.54
 -13   8  -3    7.82    2.09
  -8 -13   3    9.69    2.37
 -13   8   3   10.21    2.17
  -9 -13  -3   15.01    2.85
 -13   9  -3   17.79    2.48
  -9 -13   3   10.85    2.68
 -13   9   3   17.31    2.46
  -8  14  -3   11.33    1.99
 -14  -8  -3   17.25    3.21
 -14  -8   3    6.71    2.71
  -8  14   3    8.69    1.75
  -7  14  -3   11.04    1.83
 -14  -7  -3   11.19    2.92
 -14  -7   3   17.01    2.96
  -7  14   3    6.49    1.58
 -14  -6  -3   29.42    3.47
  -6  14  -3   23.25    2.25
 -14  -6   3   26.15    3.18
  -6  14   3   26.89    2.24
 -14  -5  -3   42.56    3.92
  -5  14  -3   38.02    2.84
  -5  14   3   32.36    2.59
 -14  -5   3   42.69    3.91
  -4  14  -3   57.96    3.38
 -14  -4  -3   68.17    4.62
 -14  -4   3   60.01    4.25
  -3  14  -3   44.57    2.77
 -14  -3  -3   43.58    3.96
 -14  -3   3   49.59    3.99
 -14  -2  -3   53.66    4.09
 -14  -2   3   65.93    4.14
 -14  -2   3   49.88    3.52
 -14  -1  -3   56.40    4.00
 -14  -1   3   45.67    3.50
 -14  -1   3   40.16    3.33
 -14   0  -3   61.50    3.81
 -14   0  -3   66.08    4.04
 -14   0   3   65.14    3.95
 -14   0   3   60.13    3.93
 -14   1  -3   41.33    3.32
 -14   1  -3   49.72    3.58
 -14   1   3   57.37    3.93
 -14   2  -3   60.54    3.86
 -14   2  -3   65.46    3.96
 -14   2   3   61.13    3.97
 -14   3  -3   42.03    3.46
 -14   3   3   40.93    3.28
 -14   4  -3   58.06    4.10
  -4 -14   3   55.50    3.80
 -14   4   3   48.65    3.90
 -14   5  -3   35.07    3.12
  -5 -14   3   41.42    3.51
 -14   5   3   34.40    3.06
  -6 -14  -3   29.05    3.11
 -14   6  -3   27.47    2.92
 -14   6   3   24.45    2.77
  -6 -14   3   19.17    2.73
 -14   7  -3    6.29    2.09
  -7 -14  -3    8.06    2.35
 -14   7   3   11.79    2.37
  -7 -14   3   10.86    2.43
  -8 -14  -3    8.39    2.61
 -14   8  -3   11.52    2.42
 -14   8   3    9.09    2.36
  -8 -14   3    7.63    2.56
  -6  15  -3    7.44    1.72
 -15  -6  -3   16.46    3.16
 -15  -6   3   16.95    3.10
 -15  -5  -3   12.35    2.82
  -5  15  -3   11.75    1.81
 -15  -5   3   17.23    2.83
 -15  -4  -3   29.04    3.47
 -15  -4   3   21.93    2.90
 -15  -3  -3   29.94    3.42
 -15  -3   3   24.69    2.94
 -15  -2  -3   23.96    3.06
 -15  -2   3   16.19    2.57
 -15  -1  -3   51.34    4.24
 -15  -1   3   41.99    3.51
 -15  -1   3   39.54    3.19
 -15   0  -3   30.59    3.13
 -15   0   3   25.42    3.07
 -15   0   3   24.87    2.71
 -15   1  -3   44.06    3.48
 -15   1  -3   46.75    3.74
 -15   1   3   47.12    3.84
 -15   2  -3   24.40    2.68
 -15   2   3   25.32    2.87
 -15   3  -3   27.66    2.89
 -15   3   3   22.17    2.79
 -15   4  -3   31.11    3.06
 -15   4   3   20.46    2.74
 -15   5  -3   16.64    2.64
 -15   5   3   12.84    2.53
 -15   6  -3   15.44    2.55
  -6 -15   3   13.24    2.60
 -15   6   3   11.89    2.49
 -16  -3  -3   19.82    3.16
 -16  -3   3   25.22    3.21
 -16  -2  -3    7.13    2.51
 -16  -2   3   13.53    2.53
 -16  -1  -3   31.97    3.53
 -16  -1   3   25.43    3.07
 -16   0  -3   18.91    2.83
 -16   0   3   17.92    2.49
 -16   1   3   26.19    2.94
 -16   2  -3    3.61    2.14
 -16   2   3    7.72    2.25
 -16   3  -3   27.11    3.05
 -16   3   3   23.77    2.98
   0   0  -4  987.51   34.62
   1   0  -4   78.55    2.81
   0  -1  -4   75.96    2.77
   0   1  -4   70.62    2.82
  -1   0  -4   75.81    2.84
  -1   0   4   76.75    2.80
   0   1   4   78.54    2.76
   0  -1   4   80.27    2.79
   1   0   4   73.76    2.75
  -1   0   4   72.31    2.82
   0  -1   4   75.08    2.87
   1  -1  -4  312.35   10.91
  -1   1  -4  316.81   11.01
  -1  -1  -4  313.45   10.86
  -1  -1  -4  295.28   10.99
  -1   1   4  319.80   11.34
  -1  -1   4  304.89   11.32
   1   1   4  325.43   11.26
  -1   1   4  320.68   11.30
  -1   1   4  317.05   11.31
  -1  -1   4  329.65   11.42
   1  -1   4  327.56   11.32
  -1   2  -4   29.58    1.30
   1  -2  -4   30.03    1.10
  -2  -1  -4   24.04    1.30
  -2  -1  -4   29.09    1.10
   1  -2   4   29.00    1.24
  -2  -1   4   28.99    1.37
  -2  -1   4   29.62    1.28
  -1   2   4   29.48    1.13
  -1   2   4   29.64    1.24
   2   1   4   29.46    1.13
   0  -2  -4  169.04    5.92
  -2   0  -4  158.35    5.90
  -2   0  -4  169.70    6.05
   0   2  -4  165.44    6.04
   0   2   4  159.48    5.72
   0  -2   4  167.89    5.88
  -2   0   4  155.12    5.81
   0  -2   4  164.78    5.77
  -2   0   4  157.90    5.81
   2   0   4  159.36    5.73
  -1  -2  -4   31.08    1.12
  -1  -2  -4   28.25    1.28
  -2   1  -4   27.92    1.34
  -2   1  -4   29.92    1.23
  -2   1   4   31.07    1.35
  -1  -2   4   31.92    1.44
   2  -1   4   29.92    1.26
  -1  -2   4   29.76    1.25
  -2   1   4   31.11    1.25
   1   2   4   29.30    1.12
  -2   2  -4  247.00    8.63
  -2  -2  -4  228.26    8.70
  -2   2  -4  244.26    8.69
   2  -2  -4  243.53    8.50
   2  -2  -4  244.29    8.51
  -2   2   4  242.65    8.69
  -2  -2   4  228.67    8.78
  -2  -2   4  238.26    8.65
  -2   2   4  251.54    8.55
   2  -2   4  251.61    8.68
  -2   3  -4   98.46    3.78
  -3  -2  -4  101.55    3.63
  -2   3  -4  102.79    3.83
  -3  -2  -4  102.33    3.93
  -3  -2   4  100.61    3.71
   2  -3   4  101.29    3.72
  -2   3   4  101.51    3.72
  -3  -2   4   92.37    3.84
  -3  -1  -4  499.70   17.84
  -1   3  -4  510.31   18.00
  -3  -1  -4  505.99   18.05
   1  -3  -4  515.05   17.80
  -1   3   4  573.38   18.89
   1  -3   4  530.28   19.08
   1  -3   4  545.88   19.01
  -1   3   4  557.88   18.99
  -3  -1   4  530.22   19.04
  -3  -1   4  493.91   19.10
   0  -3  -4   14.67    0.74
  -3   0  -4   13.55    0.93
  -3   0  -4   13.26    0.74
   0   3  -4   15.22    0.93
   0  -3   4   15.95    0.98
  -3   0   4   13.37    0.92
   0   3   4   16.02    0.72
  -3   0   4   16.13    0.92
   0  -3   4   14.89    0.80
   3   0   4   13.44    0.76
  -3   1  -4  487.16   19.08
  -1  -3  -4  590.20   18.86
  -1  -3  -4  551.05   19.03
  -3   1  -4  524.33   18.99
   1   3   4  505.12   17.90
  -3   1   4  498.74   18.09
  -3   1   4  534.49   18.03
  -1  -3   4  501.19   18.17
  -1  -3   4  516.65   18.01
   3  -1   4  509.33   18.03
  -3   2  -4   95.26    3.57
  -3   2  -4   97.42    3.65
  -2  -3  -4   92.12    3.64
   3  -2   4   98.90    3.87
  -3   2   4  113.14    3.77
  -2  -3   4  100.27    3.82
  -2  -3   4   98.07    4.02
  -3   2   4  107.09    3.93
  -3   3  -4  153.29    5.67
  -3   3  -4  151.62    5.63
  -3  -3  -4  154.38    5.76
  -3  -3   4  150.67    5.38
   3  -3   4  145.05    5.42
  -3   3   4  154.06    5.46
  -3  -3   4  138.86    5.57
  -3   4  -4   72.86    2.84
  -3   4  -4   74.68    2.84
  -4  -3  -4   64.27    2.97
  -4  -3   4   69.26    2.70
   3  -4   4   67.15    2.73
  -3   4   4   66.10    2.73
  -4  -3   4   69.60    2.96
  -4  -2  -4  380.27   13.19
  -2   4  -4  398.34   13.38
  -4  -2  -4  337.05   13.44
  -2   4  -4  378.52   13.31
   2  -4   4  424.51   15.17
  -4  -2   4  438.84   15.35
  -2   4   4  426.56   15.16
  -4  -2   4  418.53   15.18
  -4  -1  -4    1.17    0.35
  -4  -1  -4    2.33    0.59
   1  -4  -4    2.08    0.29
  -1   4  -4    0.89    0.35
  -1   4  -4    1.26    0.44
  -4  -1   4    0.39    0.45
   1  -4   4    0.36    0.36
  -1   4   4    0.36    0.30
  -4  -1   4   -0.16    0.46
   1  -4   4    0.69    0.44
  -4   0  -4  461.51   16.31
  -4   0  -4  446.32   16.14
   0  -4  -4  461.52   16.13
   0  -4   4  473.80   16.18
  -4   0   4  437.98   16.12
  -4   0   4  422.09   16.10
   0   4   4  468.21   15.96
   0  -4   4  463.09   16.03
  -1  -4  -4    0.21    0.39
  -4   1  -4   -0.04    0.47
  -4   1  -4    0.09    0.37
  -4   1   4    1.35    0.42
  -4   1   4    1.21    0.50
  -1  -4   4    1.27    0.53
   1   4   4    1.32    0.22
  -1  -4   4    0.74    0.34
  -2  -4  -4  420.17   15.06
  -4   2  -4  412.59   14.99
  -4   2  -4  431.69   15.07
  -2  -4   4  387.54   14.19
  -4   2   4  404.20   13.94
  -2  -4   4  390.88   13.95
  -4   2   4  392.43   14.09
  -3  -4  -4   67.82    2.89
  -4   3  -4   67.25    2.76
  -4   3  -4   70.30    2.80
  -3  -4   4   77.82    3.25
  -4   3   4   77.32    2.82
  -3  -4   4   75.18    2.92
  -4   3   4   74.94    3.07
  -4   4  -4  428.75   15.06
  -4  -4  -4  397.30   15.20
  -4   4  -4  437.26   15.08
  -4  -4   4  430.19   14.94
  -4  -4   4  395.92   15.22
  -4   4   4  434.89   15.07
  -5  -4  -4   75.37    3.28
  -4   5  -4   68.65    2.99
  -4   5  -4   74.47    2.98
  -4   5   4   83.50    3.25
  -5  -4   4   68.09    3.39
  -5  -4   4   85.28    3.15
  -3   5  -4  275.85    9.83
  -5  -3  -4  269.95    9.65
  -3   5  -4  277.11    9.83
  -5  -3  -4  261.70   10.02
  -5  -3   4  256.78    9.13
  -5  -3   4  245.19    9.34
  -3   5   4  252.14    9.12
   3  -5   4  250.93    9.13
  -5  -2  -4    9.10    0.95
  -2   5  -4   10.14    0.85
  -5  -2  -4    9.52    0.73
  -2   5  -4    9.96    0.83
  -2   5   4   16.07    0.94
  -5  -2   4   10.99    1.07
   2  -5   4   14.45    0.99
  -5  -2   4   13.13    1.09
  -5  -1  -4  453.88   17.76
  -1   5  -4  501.45   17.59
  -5  -1  -4  502.66   17.56
   1  -5  -4  507.49   17.48
  -1   5  -4  514.46   17.71
   1  -5   4  554.16   19.54
  -5  -1   4  532.56   19.68
  -5  -1   4  550.34   19.62
  -1   5   4  555.66   19.49
   1  -5   4  566.26   19.64
  -5   0  -4    5.42    0.60
   0  -5  -4    6.09    0.58
  -5   0  -4    4.94    0.74
   0  -5   4    5.15    0.70
   0  -5   4    5.23    0.56
   0   5   4    5.37    0.46
  -5   0   4    4.41    0.68
  -5   0   4    4.78    0.71
  -5   1  -4  558.64   19.98
  -5   1  -4  569.58   20.10
  -1  -5  -4  562.50   19.99
   1   5   4  514.87   18.20
  -1  -5   4  508.80   18.31
  -5   1   4  536.32   18.41
  -1  -5   4  524.82   18.54
  -5   1   4  505.48   18.46
  -5   2  -4   13.46    1.08
  -5   2  -4   13.35    1.02
  -2  -5  -4   13.22    1.05
  -5   2   4    9.04    0.86
  -5   2   4    9.39    0.78
  -2  -5   4    9.48    1.00
  -2  -5   4    9.98    0.77
  -5   3  -4  248.81    9.32
  -3  -5  -4  260.23    9.45
  -5   3  -4  259.19    9.37
  -5   3   4  285.86   10.21
  -3  -5   4  288.83   10.60
  -3  -5   4  285.68   10.26
  -5   3   4  286.58   10.44
  -4  -5  -4   81.97    3.60
  -5   4  -4   83.91    3.43
  -5   4  -4   86.71    3.41
  -5   4   4   74.34    2.71
  -5   4   4   75.75    3.08
  -4  -5   4   71.02    2.86
  -4  -5   4   69.27    3.26
  -5  -5  -4  143.53    5.78
  -5   5  -4  145.17    5.47
  -5   5  -4  144.28    5.55
  -5  -5   4  135.78    5.66
  -5   5   4  139.38    5.41
  -5  -5   4  146.15    5.26
  -6  -5  -4   64.89    3.18
  -5   6  -4   62.62    2.85
  -5   6  -4   65.18    2.73
  -6  -5   4   42.29    1.93
  -6  -5   4   34.29    2.31
  -5   6   4   43.07    2.08
  -4   6  -4  111.07    4.34
  -4   6  -4  109.69    4.27
  -6  -4  -4  109.56    4.64
  -6  -4  -4  110.73    4.08
  -4   6   4  106.28    4.08
  -6  -4   4  108.13    4.03
  -6  -4   4   92.20    4.29
  -6  -3  -4   62.11    2.59
  -6  -3  -4   71.62    3.11
  -3   6  -4   67.41    2.76
  -3   6  -4   64.77    2.72
  -3   6   4   85.40    3.39
  -6  -3   4   88.37    3.45
  -6  -3   4   81.89    3.69
   3  -6   4   84.36    3.41
  -6  -2  -4  185.35    6.94
  -6  -2  -4  189.22    7.29
  -2   6  -4  197.77    7.03
  -2   6  -4  190.93    7.07
   2  -6   4  214.76    7.84
  -6  -2   4  208.28    7.85
   2  -6   4  213.42    7.79
  -6  -2   4  210.35    8.02
  -2   6   4  216.06    7.75
  -6  -1  -4    0.61    0.67
   1  -6  -4    1.60    0.38
  -1   6  -4    1.62    0.47
  -1   6  -4    0.71    0.51
  -6  -1  -4    0.97    0.49
  -1   6   4    3.35    0.48
  -6  -1   4    3.37    0.78
   1  -6   4    2.73    0.55
   1  -6   4    3.48    0.66
  -6  -1   4    3.45    0.73
   0  -6  -4  370.03   12.58
  -6   0  -4  342.95   12.79
  -6   0  -4  329.24   12.59
   0   6  -4  363.20   12.56
   0  -6   4  360.88   12.81
  -6   0   4  370.61   12.98
   0  -6   4  363.76   12.98
  -6   0   4  327.96   12.93
   0   6   4  369.99   12.73
  -1  -6  -4    2.62    0.60
  -6   1  -4    3.29    0.75
  -6   1  -4    2.56    0.62
  -1  -6   4    0.79    0.61
  -6   1   4    0.19    0.61
  -6   1   4    0.88    0.55
   1   6   4    1.41    0.31
  -1  -6   4    0.90    0.43
  -2  -6  -4  227.18    8.35
  -6   2  -4  225.81    8.30
  -6   2  -4  223.24    8.37
  -6   2   4  199.54    7.38
  -2  -6   4  201.43    7.47
  -2  -6   4  193.09    7.13
  -6   2   4  201.28    7.22
   2   6   4  189.19    6.97
  -3  -6  -4   92.73    3.76
  -6   3  -4   86.62    3.65
  -6   3  -4   89.87    3.65
  -6   3   4   66.99    2.65
  -6   3   4   64.88    2.93
  -3  -6   4   67.37    2.66
  -3  -6   4   66.68    3.06
  -6   4  -4  112.34    4.41
  -4  -6  -4  106.69    4.53
  -6   4  -4  111.09    4.36
  -6   4   4  111.02    4.09
  -4  -6   4  100.07    4.56
  -4  -6   4  115.79    4.19
  -6   4   4  112.69    4.44
  -6   5  -4   42.05    2.08
  -5  -6  -4   42.47    2.44
  -6   5  -4   44.40    2.18
  -5  -6   4   59.66    3.09
  -5  -6   4   64.04    2.64
  -6   5   4   68.82    2.92
  -6  -6  -4   54.78    2.91
  -6   6  -4   53.10    2.44
  -6   6  -4   52.07    2.59
  -6  -6   4   44.83    2.73
  -6   6   4   54.61    2.53
  -6  -6   4   52.34    2.26
  -6   7  -4   51.12    2.53
  -7  -6  -4   46.47    2.90
  -6   7  -4   48.66    2.30
  -7  -6   4   54.21    3.09
  -7  -6   4   61.16    2.59
  -6   7   4   57.02    2.78
  -7  -5  -4   35.91    1.62
  -7  -5  -4   41.16    2.54
  -5   7  -4   38.93    1.89
  -5   7  -4   37.36    2.05
  -5   7   4   43.98    2.24
  -7  -5   4   46.63    2.18
  -7  -5   4   43.38    2.67
  -7  -4  -4  109.78    4.89
  -4   7  -4  119.18    4.59
  -4   7  -4  116.40    4.48
  -7  -4  -4  116.07    4.35
  -7  -4   4  105.85    4.70
  -4   7   4  108.48    4.35
  -7  -4   4  114.45    4.38
  -7  -3  -4   22.99    1.86
  -7  -3  -4   25.28    1.38
  -3   7  -4   26.18    1.42
  -3   7  -4   24.68    1.47
   3  -7   4   43.72    2.11
  -7  -3   4   46.22    2.19
  -3   7   4   46.02    2.07
  -7  -3   4   41.63    2.45
  -2   7  -4   29.52    1.57
   2  -7  -4   29.56    1.27
  -7  -2  -4   28.46    1.52
  -7  -2  -4   30.24    1.97
  -2   7  -4   28.93    1.53
  -2   7   4   22.21    1.25
  -2   7   4   21.37    1.03
   2  -7   4   21.70    1.33
   2  -7   4   23.27    1.40
  -7  -2   4   22.92    1.52
  -7  -2   4   18.50    1.66
  -7  -1  -4   99.93    4.24
  -1   7  -4  103.06    3.91
  -1   7  -4  101.95    4.06
  -7  -1  -4   96.68    3.94
   1  -7  -4  103.08    3.82
   1  -7   4  119.00    4.51
  -7  -1   4  123.14    4.79
  -1   7   4  118.59    4.43
   1  -7   4  115.45    4.62
  -7  -1   4  112.54    4.65
  -7   0  -4   -0.04    0.56
  -7   0  -4   -0.70    0.66
   0   7  -4   -0.31    0.41
   0  -7  -4    0.34    0.45
   0   7   4    0.49    0.35
  -7   0   4   -1.09    0.59
  -7   0   4   -0.65    0.67
   0  -7   4   -0.36    0.59
   0  -7   4   -0.26    0.45
  -7   1  -4  119.27    4.67
  -7   1  -4  116.04    4.78
  -1  -7  -4  122.67    4.65
   1   7   4  101.53    3.81
  -1  -7   4  109.06    4.26
  -1  -7   4  102.19    3.94
  -7   1   4  102.86    4.12
  -7   1   4  100.86    4.21
  -7   2  -4   20.95    1.51
  -2  -7  -4   24.31    1.52
  -7   2  -4   23.00    1.54
  -2  -7   4   31.09    1.49
  -2  -7   4   30.87    1.85
   2   7   4   28.93    1.24
  -7   2   4   30.20    1.61
  -7   2   4   29.37    1.85
  -3  -7  -4   45.94    2.37
  -7   3  -4   45.30    2.30
  -7   3  -4   47.89    2.30
  -3  -7   4   26.23    1.37
  -7   3   4   25.38    1.75
  -3  -7   4   26.28    1.85
  -7   3   4   27.41    1.43
  -4  -7  -4  114.93    4.75
  -7   4  -4  114.06    4.55
  -7   4  -4  111.01    4.59
  -4  -7   4  123.55    5.10
  -7   4   4  122.02    4.91
  -7   4   4  120.35    4.55
  -4  -7   4  119.76    4.58
  -7   5  -4   50.06    2.36
  -5  -7  -4   48.91    2.73
  -7   5  -4   47.79    2.50
  -5  -7   4   39.58    1.79
  -5  -7   4   31.64    2.29
  -7   5   4   38.03    1.64
  -7   5   4   40.56    2.19
  -7   6  -4   60.11    2.77
  -7   6  -4   58.96    2.94
  -6  -7  -4   65.52    3.33
  -6  -7   4   46.59    2.17
  -6  -7   4   50.59    2.91
  -7   6   4   47.63    2.53
  -7  -7  -4   26.19    2.30
  -7   7  -4   24.28    1.66
  -7   7  -4   25.94    1.94
  -7  -7   4   21.13    1.47
  -7  -7   4   22.23    2.13
  -7   7   4   21.46    1.68
  -7   8  -4  155.37    6.30
  -8  -7  -4  159.00    6.82
  -8  -7   4  146.41    5.78
  -7   8   4  148.70    6.02
  -8  -7   4  155.13    6.55
  -8  -6  -4    5.76    1.51
  -6   8  -4    8.12    1.36
  -6   8  -4    6.82    1.10
  -6   8   4    9.37    1.18
  -8  -6   4   10.80    1.14
  -8  -6   4    9.18    1.55
  -5   8  -4   89.79    3.67
  -8  -5  -4   92.77    4.38
  -5   8  -4   89.72    3.89
  -8  -5   4   84.32    4.14
  -5   8   4   85.21    3.72
  -8  -5   4   94.46    3.75
  -8  -4  -4   42.35    2.66
  -4   8  -4   45.55    2.10
  -4   8  -4   43.89    2.24
  -8  -4  -4   42.41    2.04
  -4   8   4   35.44    1.93
  -8  -4   4   39.39    2.05
  -8  -4   4   31.94    2.34
  -8  -3  -4   85.65    3.59
  -3   8  -4   89.69    3.62
  -3   8  -4   95.00    3.70
  -8  -3  -4   86.24    4.05
   3  -8   4   99.09    4.01
  -3   8   4  103.09    3.97
  -8  -3   4   99.07    4.13
  -8  -3   4   94.53    4.38
  -2   8  -4   33.35    1.72
  -8  -2  -4   32.99    1.75
  -8  -2  -4   29.04    2.06
  -2   8  -4   31.72    1.74
   2  -8  -4   31.99    1.43
  -8  -2   4   30.71    1.89
   2  -8   4   31.06    1.72
  -2   8   4   31.16    1.39
  -2   8   4   29.94    1.56
   2  -8   4   28.70    1.69
  -8  -2   4   27.32    2.06
  -8  -1  -4   30.49    2.08
   1  -8  -4   31.55    1.51
  -1   8  -4   32.12    1.60
  -1   8  -4   30.18    1.77
  -8  -1  -4   29.02    1.72
  -8  -1   4   25.11    1.75
   1  -8   4   24.07    1.43
  -8  -1   4   23.05    1.76
   1  -8   4   22.51    1.51
  -1   8   4   20.58    1.24
   0   8  -4   46.72    2.28
   0  -8  -4   42.72    2.02
  -8   0  -4   38.62    2.16
   0   8  -4   44.80    2.00
  -8   0  -4   46.00    2.43
   0  -8   4   41.92    2.20
  -8   0   4   43.54    2.33
  -8   0   4   40.04    2.24
   0   8   4   44.35    1.85
   0  -8   4   43.16    1.99
   1   8  -4   23.70    1.31
  -8   1  -4   24.37    1.78
  -8   1  -4   24.10    1.61
  -1  -8  -4   25.34    1.53
  -1  -8   4   31.57    1.60
  -8   1   4   31.93    2.03
  -1  -8   4   33.84    1.91
   1   8   4   31.41    1.41
  -8   1   4   28.36    1.81
  -8   2  -4   30.65    1.85
  -2  -8  -4   32.90    1.84
  -8   2  -4   26.57    1.84
  -2  -8   4   30.51    1.97
  -8   2   4   31.64    2.03
   2   8   4   32.37    1.36
  -2  -8   4   32.33    1.59
  -8   2   4   31.16    1.79
  -3  -8  -4  107.43    4.43
  -8   3  -4  105.11    4.36
  -8   3  -4  103.39    4.35
  -8   3   4   90.73    3.66
  -8   3   4   94.85    3.96
  -3  -8   4   87.24    4.00
  -3  -8   4   88.76    3.53
  -8   4  -4   38.87    2.25
  -4  -8  -4   38.90    2.40
  -8   4  -4   39.44    2.19
  -4  -8   4   44.22    2.00
  -4  -8   4   42.68    2.59
  -8   4   4   44.28    2.47
  -8   4   4   43.96    2.03
  -8   5  -4   92.05    3.89
  -5  -8  -4   92.39    4.25
  -8   5  -4   91.55    4.03
  -5  -8   4   85.99    4.15
  -8   5   4   89.51    3.93
  -5  -8   4   87.78    3.49
  -8   6  -4    9.93    1.36
  -8   6  -4   14.40    1.31
  -6  -8  -4   12.25    1.71
  -8   6   4    6.50    1.15
  -6  -8   4    6.82    0.86
  -6  -8   4    8.09    1.50
  -8   7  -4  161.88    6.47
  -7  -8  -4  157.18    6.83
  -8   7   4  149.69    6.17
  -7  -8   4  155.25    6.61
  -8   8  -4    1.41    1.12
  -8  -8  -4    1.04    1.49
  -8  -8   4    2.90    1.53
  -8   8   4    2.52    1.10
  -9  -8  -4  185.28    8.30
  -8   9  -4  206.01    7.87
  -8   9   4  183.78    7.14
  -9  -8   4  170.19    7.63
  -9  -7  -4    9.74    1.90
  -7   9  -4    6.34    1.25
  -9  -7   4   10.57    1.84
  -7   9   4    8.11    1.22
  -6   9  -4  109.50    4.79
  -9  -6  -4  117.15    5.42
  -6   9   4  103.25    4.46
  -9  -6   4  110.49    5.07
  -9  -6   4  102.96    4.36
  -5   9  -4    9.13    1.16
  -9  -5  -4    8.27    1.56
  -9  -5   4    9.98    1.22
  -5   9   4   12.08    1.22
  -9  -5   4   10.23    1.71
  -4   9  -4   75.23    3.24
  -9  -4  -4   66.43    3.70
  -9  -4  -4   71.42    3.07
  -4   9  -4   71.14    3.06
  -9  -4   4   69.43    3.65
  -4   9   4   65.69    3.05
  -9  -4   4   70.47    3.21
  -9  -3  -4   49.67    2.52
  -3   9  -4   53.52    2.49
  -3   9  -4   53.99    2.54
  -9  -3  -4   58.59    3.18
  -3   9   4   46.70    2.21
  -9  -3   4   42.67    2.80
  -9  -3   4   46.30    2.51
  -9  -2  -4   19.67    1.85
  -2   9  -4   17.79    1.38
  -2   9  -4   17.00    1.35
  -9  -2  -4   15.19    1.31
  -9  -2   4   27.19    2.14
  -9  -2   4   25.51    1.91
   2  -9   4   24.48    1.66
  -2   9   4   28.03    1.51
   2  -9   4   22.08    1.58
  -9  -1  -4   65.10    2.90
  -1   9  -4   61.15    2.86
  -9  -1  -4   61.82    3.21
   1  -9  -4   60.13    2.61
  -1   9  -4   62.03    2.71
   1  -9   4   61.64    2.72
   1  -9   4   60.73    2.86
  -9  -1   4   62.82    3.16
  -9  -1   4   63.01    3.01
  -1   9   4   60.19    2.59
   0  -9  -4   11.38    1.07
   0   9  -4   11.19    1.22
  -9   0  -4   12.97    1.24
   0   9  -4   11.42    0.96
  -9   0  -4   12.91    1.45
  -9   0   4    8.43    1.23
   0  -9   4    8.80    1.12
   0  -9   4   11.32    0.98
  -9   0   4   10.26    1.29
   0   9   4    9.90    0.80
  -1  -9  -4   64.93    2.93
  -9   1  -4   67.46    3.07
  -9   1  -4   62.31    3.15
   1   9  -4   64.85    2.74
  -9   1   4   60.01    2.98
  -1  -9   4   58.08    2.55
  -1  -9   4   62.27    2.92
  -9   1   4   57.69    2.83
   1   9   4   57.28    2.37
  -9   2  -4   24.38    1.88
   2   9  -4   26.56    1.43
  -9   2  -4   26.57    1.97
  -2  -9  -4   23.96    1.76
  -2  -9   4   16.74    1.57
  -9   2   4   14.02    1.34
  -9   2   4   15.62    1.54
  -2  -9   4   16.50    1.23
  -9   3  -4   45.50    2.55
  -9   3  -4   49.28    2.56
  -3  -9  -4   45.88    2.56
  -3  -9   4   53.33    2.86
  -3  -9   4   50.90    2.30
  -9   3   4   51.89    2.85
  -9   3   4   52.62    2.49
  -9   4  -4   71.41    3.39
  -4  -9  -4   68.18    3.48
  -9   4  -4   70.74    3.28
  -9   4   4   70.91    3.05
  -4  -9   4   70.59    2.95
  -4  -9   4   74.82    3.63
  -9   4   4   69.07    3.42
  -5  -9  -4   10.63    1.59
  -9   5  -4   11.15    1.39
  -9   5  -4   10.62    1.27
  -9   5   4    7.53    1.33
  -5  -9   4    9.97    1.57
  -5  -9   4   10.70    0.96
  -9   6  -4  111.78    4.73
  -6  -9  -4  110.79    5.12
  -9   6  -4  107.22    4.81
  -6  -9   4  105.26    5.02
  -9   6   4  104.69    4.65
  -9   7  -4   10.58    1.51
  -7  -9  -4   12.46    1.94
  -9   7   4    7.62    1.35
  -7  -9   4    7.02    1.65
  -8  -9  -4  182.87    8.06
  -9   8  -4  196.39    7.68
  -8  -9   4  185.89    8.13
  -9   8   4  194.39    7.66
  -9  -9  -4    0.37    1.67
  -9   9  -4    0.02    1.23
  -9  -9   4    0.65    1.71
  -9   9   4    2.51    1.28
  -9  10  -4  142.63    6.16
 -10  -9  -4  139.72    6.81
 -10  -9   4  167.26    7.50
  -9  10   4  152.61    6.69
  -8  10  -4    2.18    1.25
 -10  -8  -4    3.94    1.88
 -10  -8   4    2.82    1.84
  -8  10   4    3.12    1.22
 -10  -7  -4   81.66    4.60
  -7  10  -4   77.74    3.83
 -10  -7   4   79.78    4.44
  -7  10   4   70.28    3.58
  -6  10  -4    3.47    1.11
 -10  -6  -4    3.69    1.72
 -10  -6   4    4.22    1.59
  -6  10   4    2.37    1.02
  -5  10  -4   73.33    3.48
 -10  -5  -4   75.66    4.18
 -10  -5   4   67.95    3.78
 -10  -5   4   62.12    3.10
  -5  10   4   58.67    3.00
 -10  -4  -4   20.23    2.12
  -4  10  -4   19.66    1.67
  -4  10   4   19.81    1.64
 -10  -4   4   23.56    1.93
 -10  -4   4   23.99    2.22
 -10  -3  -4   48.22    3.08
  -3  10  -4   40.53    2.24
  -3  10  -4   45.72    2.35
 -10  -3  -4   43.39    2.33
 -10  -3   4   47.89    2.66
  -3  10   4   47.93    2.37
 -10  -3   4   51.15    3.11
  -2  10  -4   20.93    1.55
 -10  -2  -4   20.57    1.62
  -2  10  -4   19.90    1.56
 -10  -2  -4   20.95    2.00
   2 -10   4   22.27    1.62
 -10  -2   4   23.98    2.09
 -10  -2   4   20.67    1.77
   2 -10   4   23.37    1.68
  -2  10   4   21.62    1.46
 -10  -1  -4    7.93    1.43
  -1  10  -4    9.02    0.97
  -1  10  -4    7.45    1.13
 -10  -1  -4    9.91    1.22
 -10  -1   4   14.09    1.53
 -10  -1   4   13.36    1.59
   1 -10   4   13.76    1.20
  -1  10   4   12.69    1.04
   1 -10   4   14.23    1.38
   0  10  -4   17.72    1.64
   0 -10  -4   18.42    1.43
   0  10  -4   15.54    1.29
 -10   0  -4   15.04    1.45
 -10   0  -4   15.11    1.69
   0  10   4   15.65    1.16
 -10   0   4   16.34    1.65
 -10   0   4   14.60    1.61
   0 -10   4   18.57    1.68
   0 -10   4   18.15    1.41
  -1 -10  -4   14.01    1.33
   1  10  -4   14.16    1.10
 -10   1  -4   14.49    1.43
 -10   1  -4   15.50    1.67
  -1 -10   4   10.50    1.01
 -10   1   4    9.93    1.41
 -10   1   4    8.58    1.25
  -1 -10   4    6.58    1.18
  -2 -10  -4   22.97    1.83
 -10   2  -4   26.54    2.10
   2  10  -4   20.46    1.42
 -10   2  -4   25.67    2.05
 -10   2   4   18.46    1.68
 -10   2   4   20.11    1.78
  -2 -10   4   19.73    1.80
  -2 -10   4   18.89    1.41
 -10   3  -4   47.83    2.70
   3  10  -4   47.81    2.21
 -10   3  -4   47.34    2.74
  -3 -10  -4   48.83    2.73
 -10   3   4   46.54    2.75
  -3 -10   4   41.18    2.62
 -10   3   4   43.30    2.32
  -3 -10   4   40.30    2.06
 -10   4  -4   27.29    2.07
  -4 -10  -4   27.56    2.16
 -10   4  -4   20.53    2.00
  -4 -10   4   18.95    1.93
 -10   4   4   21.45    1.94
  -4 -10   4   18.59    1.50
 -10   5  -4   64.10    3.37
 -10   5  -4   65.76    3.17
  -5 -10  -4   60.27    3.49
 -10   5   4   76.81    3.75
  -5 -10   4   69.78    3.88
 -10   6  -4    2.83    1.30
  -6 -10  -4    4.04    1.47
 -10   6   4    3.22    1.29
  -6 -10   4    3.96    1.50
 -10   7  -4   77.42    4.02
  -7 -10  -4   80.54    4.40
 -10   7   4   77.71    4.02
  -7 -10   4   83.14    4.52
 -10   8  -4    0.56    1.33
  -8 -10  -4    1.37    1.72
  -8 -10   4    1.34    1.67
 -10   8   4    2.50    1.38
 -10   9  -4  161.51    6.82
  -9 -10  -4  155.40    7.44
 -10   9   4  141.56    6.28
  -9 -10   4  149.56    6.97
 -10  10  -4    1.49    1.48
 -10 -10  -4    1.12    1.99
 -10 -10   4    3.42    2.11
 -10  10   4    4.56    1.51
 -11 -10  -4   86.90    5.48
 -10  11  -4   77.04    4.42
 -10  11   4   78.36    4.30
 -11 -10   4   75.62    5.06
  -9  11  -4    0.70    1.37
 -11  -9  -4    1.78    2.08
 -11  -9   4   -0.68    2.01
  -9  11   4    0.42    1.29
 -11  -8  -4  109.23    5.93
  -8  11  -4  110.77    5.09
  -8  11   4  118.72    5.45
 -11  -8   4  131.41    6.38
  -7  11  -4    1.95    1.21
 -11  -7  -4   -0.27    1.77
 -11  -7   4   -0.08    1.77
  -7  11   4   -0.45    1.05
 -11  -6  -4   54.94    3.88
  -6  11  -4   57.66    3.08
  -6  11   4   60.72    3.30
 -11  -6   4   73.42    4.22
  -5  11  -4    6.66    1.24
 -11  -5  -4   11.44    2.11
 -11  -5   4    9.02    1.85
  -5  11   4    8.94    1.23
 -11  -5   4    9.37    1.60
  -4  11  -4   56.01    3.02
 -11  -4  -4   68.50    3.93
 -11  -4   4   46.12    3.23
 -11  -4   4   50.01    2.82
  -4  11   4   49.76    2.56
 -11  -3  -4    1.35    1.46
  -3  11  -4    0.14    0.78
  -3  11   4    0.56    0.77
 -11  -3   4    1.81    1.39
 -11  -3   4   -0.05    1.04
 -11  -2  -4    1.32    1.39
 -11  -2  -4   -0.24    0.97
  -2  11  -4   -1.29    0.73
  -2  11   4    2.52    0.75
 -11  -2   4    3.39    1.36
 -11  -2   4    2.99    1.20
  -1  11  -4    2.07    0.97
  -1  11  -4    2.48    0.80
 -11  -1  -4    5.68    1.43
 -11  -1  -4    3.36    1.09
   1 -11   4    0.65    0.78
 -11  -1   4    1.29    1.17
  -1  11   4    2.29    0.70
   1 -11   4    0.48    0.87
 -11  -1   4    0.83    1.21
   0  11  -4   11.23    1.10
   0  11  -4   10.94    1.40
 -11   0  -4    9.80    1.39
 -11   0  -4   11.71    1.65
 -11   0   4    8.82    1.48
   0 -11   4   11.54    1.39
   0 -11   4   10.17    1.12
 -11   0   4   10.77    1.57
 -11   1  -4    2.30    1.14
   1  11  -4    1.20    0.70
 -11   1  -4    2.58    1.24
  -1 -11  -4    2.14    0.95
  -1 -11   4    1.68    1.01
 -11   1   4    1.50    1.07
  -1 -11   4    2.11    0.78
 -11   1   4    3.88    1.34
 -11   2  -4    1.86    1.13
 -11   2  -4    1.38    1.18
  -2 -11  -4    2.51    1.04
   2  11  -4    2.11    0.71
  -2 -11   4    0.06    0.70
  -2 -11   4    0.54    1.04
 -11   2   4    1.16    1.01
 -11   2   4    0.61    1.21
  -3 -11  -4    0.67    1.08
 -11   3  -4    0.63    1.13
 -11   3  -4    2.06    1.22
 -11   3   4    2.97    1.29
  -3 -11   4    0.60    1.12
  -4 -11  -4   57.01    3.29
 -11   4  -4   56.82    3.26
 -11   4  -4   56.15    3.06
  -4 -11   4   55.98    3.40
 -11   4   4   58.72    3.40
 -11   5  -4    9.38    1.60
  -5 -11  -4    5.75    1.61
 -11   5   4    8.61    1.56
  -5 -11   4    5.63    1.61
 -11   6  -4   70.38    3.89
  -6 -11  -4   70.33    4.01
  -6 -11   4   59.46    3.74
 -11   6   4   54.01    3.39
 -11   7  -4    0.46    1.42
  -7 -11  -4    0.86    1.61
  -7 -11   4    1.90    1.70
 -11   7   4    2.71    1.46
 -11   8  -4  127.05    5.91
  -8 -11  -4  134.99    6.44
  -8 -11   4  111.61    5.75
 -11   8   4  108.09    5.24
  -9 -11  -4    3.29    2.06
 -11   9  -4    2.44    1.58
  -9 -11   4    0.76    1.98
 -11   9   4    1.14    1.53
 -11  10  -4   83.56    4.70
 -10 -11  -4   92.46    5.50
 -11  10   4   76.53    4.34
 -10 -11   4   78.94    5.04
 -11  11  -4    2.02    1.77
 -11 -11  -4    0.26    2.34
 -11 -11   4    0.42    2.38
 -11  11   4   -2.05    1.49
 -12 -11  -4   94.87    6.38
 -11  12  -4  101.60    5.63
 -11  12   4   98.86    5.27
 -12 -11   4  113.38    8.73
 -12 -10  -4    5.38    2.59
 -10  12  -4    2.35    1.75
 -12 -10   4    0.75    2.40
 -10  12   4   -0.84    1.46
  -9  12  -4  128.13    6.03
 -12  -9  -4  132.72    7.09
  -9  12   4  119.94    5.46
 -12  -9   4  113.00    6.28
 -12  -8  -4    4.57    2.32
  -8  12  -4    1.25    1.36
 -12  -8   4    3.14    2.14
  -8  12   4    1.61    1.30
  -7  12  -4   77.21    4.15
 -12  -7  -4   95.94    5.37
 -12  -7   4   73.83    4.83
  -7  12   4   77.71    3.87
  -6  12  -4    6.90    1.35
 -12  -6  -4    6.67    2.18
 -12  -6   4    9.44    2.17
  -6  12   4    6.78    1.31
 -12  -5  -4   66.58    4.31
  -5  12  -4   53.50    3.14
 -12  -5   4   60.61    3.96
  -5  12   4   49.77    2.89
  -4  12  -4   13.36    1.49
 -12  -4   4   15.21    2.16
  -4  12   4   11.96    1.39
 -12  -4   4   16.75    1.74
  -3  12  -4   40.92    2.44
 -12  -3  -4   44.67    3.43
  -3  12   4   32.59    2.02
 -12  -3   4   28.88    2.33
 -12  -3   4   32.18    2.95
 -12  -2  -4   10.48    1.49
  -2  12  -4   13.83    1.40
  -2  12   4   14.96    1.35
 -12  -2   4   16.80    1.81
 -12  -2   4   14.78    1.99
 -12  -1  -4    1.91    1.52
  -1  12  -4    2.22    0.89
 -12  -1  -4    1.56    1.11
 -12  -1   4    4.17    1.38
 -12  -1   4    4.35    1.49
   0  12  -4   28.13    2.26
 -12   0  -4   28.60    2.26
 -12   0  -4   33.98    2.77
   0  12  -4   28.95    1.90
 -12   0   4   34.18    2.58
   0 -12   4   24.96    2.15
   0 -12   4   29.05    1.96
 -12   0   4   30.07    2.60
 -12   1  -4    5.98    1.43
 -12   1  -4    2.85    1.40
   1  12  -4    4.23    1.26
   1  12  -4    3.19    0.98
 -12   1   4    1.74    1.23
  -1 -12   4    2.78    0.88
 -12   1   4    3.24    1.46
  -1 -12   4    2.37    1.16
 -12   2  -4   14.70    1.82
 -12   2  -4   12.47    1.74
 -12   2   4   11.18    1.59
 -12   2   4   10.78    1.76
  -2 -12   4   11.65    1.62
  -3 -12  -4   28.52    2.46
 -12   3  -4   31.98    2.49
 -12   3  -4   32.24    2.53
  -3 -12   4   43.02    2.97
 -12   3   4   37.34    3.00
 -12   4  -4   13.31    1.82
  -4 -12  -4   12.11    1.79
 -12   4  -4   12.99    2.04
  -4 -12   4   12.03    1.86
 -12   4   4   13.43    1.93
  -5 -12  -4   58.45    3.62
 -12   5  -4   52.98    3.49
 -12   5   4   58.75    3.61
  -5 -12   4   53.27    3.60
  -6 -12  -4    7.49    1.91
 -12   6  -4    7.73    1.73
 -12   6   4    6.62    1.71
  -6 -12   4    8.11    1.94
  -7 -12  -4   83.30    4.97
 -12   7  -4   84.36    4.57
 -12   7   4   86.21    4.65
  -7 -12   4   90.05    5.03
 -12   8  -4   -1.59    1.58
  -8 -12  -4    2.02    1.97
 -12   8   4   -0.89    1.55
  -8 -12   4   -1.02    1.92
  -9 -12  -4  124.33    6.59
 -12   9  -4  126.34    6.05
  -9 -12   4  119.46    6.48
 -12   9   4  121.06    5.85
 -12  10  -4    1.70    1.83
 -10 -12  -4    1.49    2.23
 -12  10   4    2.46    1.74
 -10 -12   4   -1.16    2.26
 -11 -12  -4  100.94    6.30
 -11 -12   4   99.92    6.24
 -12  11   4   95.71    5.47
  -9  13  -4    2.05    1.67
 -13  -9  -4    6.04    2.75
 -13  -9   4    2.63    2.46
  -9  13   4    2.03    1.57
 -13  -8  -4  125.51    7.02
  -8  13  -4  122.37    5.69
  -8  13   4  117.89    5.32
 -13  -8   4  108.59    6.23
 -13  -7  -4    3.68    2.17
  -7  13  -4    0.74    1.31
  -7  13   4    3.06    1.31
 -13  -7   4    3.26    2.21
 -13  -6  -4   83.34    5.23
  -6  13  -4   75.69    3.99
  -6  13   4   76.24    3.77
 -13  -6   4   69.41    4.74
  -5  13  -4   22.39    2.01
 -13  -5  -4   20.98    2.79
 -13  -5   4   22.59    2.66
  -5  13   4   18.16    1.80
  -4  13  -4   84.23    4.03
 -13  -4  -4   85.91    5.16
  -4  13   4   77.75    3.73
 -13  -4   4   82.23    4.71
  -3  13  -4   19.26    1.77
 -13  -3  -4   22.09    2.61
 -13  -3   4   14.21    2.18
 -13  -3   4   13.05    1.78
  -2  13  -4    8.47    1.29
 -13  -2  -4   14.19    2.15
 -13  -2   4   13.64    2.11
 -13  -2   4   13.33    1.81
 -13  -1  -4   37.30    3.18
  -1  13  -4   30.28    2.16
 -13  -1  -4   29.01    2.42
 -13  -1   4   33.26    2.98
 -13  -1   4   27.81    2.49
 -13   0  -4    3.89    1.41
 -13   0   4    2.93    1.47
 -13   0   4    2.65    1.47
 -13   1  -4   26.71    2.33
 -13   1  -4   26.10    2.52
 -13   1   4   29.61    2.61
 -13   1   4   25.54    2.45
 -13   2  -4   11.07    1.79
 -13   2  -4   10.72    1.87
  -2 -13   4    8.79    1.65
 -13   2   4   11.57    1.99
 -13   3  -4   14.32    1.99
 -13   3  -4   11.87    1.84
 -13   3   4   18.51    2.31
  -3 -13   4   14.29    1.94
 -13   4  -4   79.85    4.43
  -4 -13  -4   77.04    4.59
 -13   4   4   81.24    4.45
  -4 -13   4   75.78    4.35
  -5 -13  -4   21.04    2.35
 -13   5  -4   17.17    2.19
  -5 -13   4   14.47    2.25
 -13   5   4   18.98    2.27
  -6 -13  -4   75.27    4.62
 -13   6  -4   75.30    4.35
 -13   6   4   84.80    4.73
  -6 -13   4   81.02    4.77
 -13   7  -4    1.28    1.73
  -7 -13  -4   -1.05    1.79
 -13   7   4    1.87    1.80
  -7 -13   4    3.75    2.00
  -8 -13  -4  121.74    6.68
 -13   8  -4  131.91    6.25
  -8 -13   4  124.68    6.46
 -13   8   4  121.84    6.19
 -13   9  -4    1.31    1.87
  -9 -13  -4   -0.50    2.11
  -9 -13   4    0.56    2.23
 -13   9   4    0.85    1.93
 -14  -8  -4    4.53    2.70
  -8  14  -4    3.02    1.64
 -14  -8   4   -1.59    2.30
  -8  14   4    1.35    1.45
  -7  14  -4   63.61    3.82
 -14  -7  -4   64.57    5.27
 -14  -7   4   66.73    4.87
  -7  14   4   64.72    3.77
  -6  14  -4    3.90    1.53
 -14  -6  -4    7.37    2.54
 -14  -6   4    4.50    2.37
  -6  14   4    1.88    1.30
  -5  14  -4   57.76    3.41
 -14  -5  -4   58.83    4.70
 -14  -5   4   68.26    4.86
  -4  14  -4   13.09    1.64
 -14  -4  -4   14.06    2.70
 -14  -4   4   16.56    2.55
  -3  14  -4   38.20    2.63
 -14  -3  -4   41.69    3.91
 -14  -3   4   26.94    2.82
 -14  -2  -4   22.59    2.74
  -2  14  -4   15.67    2.28
 -14  -2   4   12.56    1.98
 -14  -2   4   13.07    2.16
 -14  -1  -4    4.51    1.92
 -14  -1   4    2.90    1.66
 -14  -1   4    2.76    1.63
 -14   0  -4   19.17    2.22
 -14   0  -4   22.78    2.65
 -14   0   4   17.72    2.25
 -14   0   4   18.43    2.19
 -14   1  -4    3.61    1.76
 -14   1  -4    0.10    1.49
 -14   1   4    4.14    1.77
 -14   2  -4   13.96    2.09
 -14   2  -4   15.68    2.21
 -14   2   4   16.86    2.31
 -14   3  -4   31.46    2.83
  -3 -14   4   37.94    3.54
 -14   3   4   41.62    3.32
 -14   4  -4   12.78    2.17
  -4 -14   4   11.06    2.12
 -14   4   4   13.01    2.28
 -14   5  -4   60.81    4.06
  -5 -14   4   59.09    4.11
 -14   5   4   56.21    4.09
 -14   6  -4    2.93    1.90
  -6 -14  -4    3.29    2.19
  -6 -14   4    3.86    2.04
 -14   6   4    2.43    1.95
  -7 -14  -4   71.00    4.81
 -14   7  -4   60.49    4.38
 -14   7   4   61.02    4.43
  -7 -14   4   68.92    4.67
 -14   8  -4    3.28    2.06
  -8 -14  -4    0.03    2.24
  -8 -14   4    2.02    2.27
 -14   8   4    1.81    2.05
 -15  -6  -4   30.04    3.81
  -6  15  -4   33.42    2.70
 -15  -6   4   26.58    3.48
 -15  -5  -4   18.03    3.10
  -5  15  -4   19.64    2.14
 -15  -5   4   19.29    2.96
 -15  -4  -4   24.72    3.32
  -4  15  -4   19.86    2.33
 -15  -4   4   22.87    2.95
 -15  -3  -4    8.55    2.47
 -15  -3   4   21.46    2.77
 -15  -2  -4    9.29    2.40
 -15  -2   4    6.64    2.10
 -15  -1  -4   40.50    3.63
 -15  -1   4   43.02    3.65
 -15  -1   4   43.30    3.35
 -15   0  -4    0.11    1.79
 -15   0   4    2.30    1.79
 -15   1  -4   48.19    3.85
 -15   1  -4   42.38    3.54
 -15   1   4   40.02    3.33
 -15   2  -4    2.01    1.81
 -15   2   4    5.09    2.02
 -15   3  -4   17.40    2.50
 -15   3   4   11.00    2.42
 -15   4  -4   21.35    2.74
 -15   4   4   17.42    2.65
 -15   5  -4   16.16    2.58
  -5 -15   4   15.93    3.08
 -15   5   4   15.35    2.63
 -15   6  -4   30.23    3.17
 -15   6   4   25.58    3.11
  -6 -15   4   30.65    3.29
 -16  -3  -4    7.39    2.66
 -16  -3   4    9.12    2.49
 -16  -2  -4   34.20    3.75
 -16  -2   4   32.24    3.25
 -16  -1  -4    3.34    2.30
 -16   0  -4   53.56    4.31
 -16   0   4   57.16    4.30
 -16   1   4    3.83    2.14
 -16   2  -4   33.19    3.13
 -16   2   4   39.38    3.59
 -16   3  -4    8.65    2.36
 -16   3   4    4.55    2.26
   0   0  -5    0.23    0.26
   0   0   5    0.03    0.19
   0   1  -5    6.33    0.58
   0  -1  -5    7.01    0.54
   1   0  -5    6.45    0.56
  -1   0  -5    6.77    0.60
   0  -1   5    6.10    0.49
  -1   0   5    6.98    0.59
  -1   0   5    7.19    0.55
   0   1   5    7.44    0.47
   0  -1   5    7.00    0.60
   1   0   5    6.87    0.46
  -1  -1  -5    1.01    0.37
   1  -1  -5    0.54    0.26
  -1   1  -5    0.72    0.34
   1   1  -5    0.35    0.35
   1   1   5    0.65    0.19
  -1  -1   5    0.40    0.36
  -1  -1   5    0.91    0.29
  -1   1   5    1.23    0.31
   1  -1   5    0.40    0.25
   1  -2  -5   11.83    0.59
  -2  -1  -5   10.45    0.81
  -1   2  -5    9.95    0.76
   2   1   5    3.62    0.31
  -1   2   5    4.35    0.44
  -2  -1   5    5.03    0.59
   1  -2   5    4.54    0.44
  -2  -1   5    5.06    0.48
  -2   0  -5    4.09    0.55
   0  -2  -5    4.69    0.43
   0   2  -5    3.05    0.50
   0   2   5    4.64    0.36
   0  -2   5    3.63    0.39
   0  -2   5    4.44    0.55
   2   0   5    4.34    0.37
  -2   0   5    3.98    0.50
  -2   0   5    4.54    0.49
  -2   1  -5    3.18    0.51
  -2   1  -5    3.48    0.38
  -1  -2  -5    4.79    0.34
  -1  -2  -5    5.04    0.52
   2  -1   5   10.80    0.67
  -2   1   5   11.36    0.77
  -1  -2   5    9.63    0.82
  -2   1   5   11.32    0.66
   1   2   5   10.67    0.50
  -1  -2   5    9.86    0.66
  -2   2  -5   64.25    2.46
  -2   2  -5   58.76    2.54
   2  -2  -5   66.97    2.36
  -2  -2  -5   63.60    2.29
   2  -2  -5   63.07    2.35
  -2  -2  -5   66.09    2.58
  -2  -2   5   64.10    2.49
  -2  -2   5   62.61    2.65
  -2   2   5   64.89    2.54
   2   2   5   66.81    2.33
   2  -2   5   65.52    2.51
  -2   2   5   64.49    2.38
  -3  -2  -5  109.44    4.49
  -2   3  -5  120.57    4.45
  -2   3  -5  120.98    4.38
  -3  -2  -5  119.38    4.20
  -3  -2   5  131.04    5.19
  -2   3   5  141.97    5.04
  -3  -2   5  136.18    5.03
  -1   3  -5   96.47    3.64
  -3  -1  -5   89.40    3.43
   1  -3  -5  100.90    3.42
  -3  -1  -5   90.67    3.67
  -1   3   5   95.95    3.46
   1  -3   5   94.89    3.59
   3   1   5   87.53    3.37
  -3  -1   5   91.87    3.52
   1  -3   5   91.46    3.48
  -3  -1   5   89.15    3.61
  -1   3   5   98.16    3.41
  -3   0  -5  151.08    5.86
   0  -3  -5  170.39    5.89
   0   3  -5  170.76    6.07
  -3   0  -5  161.37    6.06
   0  -3   5  172.18    6.08
   0   3   5  160.68    5.84
   0  -3   5  166.33    5.92
   3   0   5  154.85    5.87
  -3   0   5  158.94    5.98
  -3   0   5  168.15    6.01
  -1  -3  -5   96.06    3.58
  -3   1  -5   95.31    3.67
  -1  -3  -5   99.95    3.41
  -3   1  -5   86.64    3.51
  -1  -3   5   97.37    3.59
  -1  -3   5   90.73    3.76
  -3   1   5   95.05    3.69
  -3   1   5  104.85    3.63
   1   3   5   96.08    3.46
   3  -1   5   95.25    3.60
  -3   2  -5  128.03    5.00
  -2  -3  -5  140.18    5.12
  -3   2  -5  141.15    5.12
  -2  -3   5  117.28    4.78
   3  -2   5  128.81    4.64
  -3   2   5  129.73    4.53
  -2  -3   5  122.21    4.59
  -3   2   5  126.27    4.68
  -3   3  -5    7.57    0.73
  -3   3  -5    9.70    0.73
  -3  -3  -5    9.18    0.88
  -3  -3   5    8.27    0.67
   3  -3   5   10.06    0.82
  -3  -3   5   10.25    0.99
  -3   3   5    8.23    0.72
  -3   4  -5  218.02    7.62
  -3   4  -5  213.36    7.65
  -4  -3  -5  193.31    7.74
  -4  -3   5  238.31    8.54
   3  -4   5  221.38    8.31
  -4  -3   5  227.74    8.28
  -3   4   5  226.92    8.32
  -2   4  -5  147.16    5.55
  -4  -2  -5  150.56    5.41
  -2   4  -5  150.33    5.63
  -4  -2  -5  155.19    5.76
  -4  -2   5  145.97    6.02
  -4  -2   5  165.83    5.91
  -2   4   5  166.52    5.87
   2  -4   5  160.24    5.87
  -4  -1  -5   63.18    2.42
   1  -4  -5   62.89    2.35
  -4  -1  -5   61.64    2.70
  -1   4  -5   65.32    2.62
   1  -4   5   58.61    2.30
  -4  -1   5   55.75    2.35
  -4  -1   5   51.11    2.41
  -1   4   5   59.24    2.23
   1  -4   5   58.18    2.41
  -4   0  -5   49.87    2.11
   0   4  -5   51.40    2.29
  -4   0  -5   55.12    2.36
   0  -4  -5   56.00    2.10
  -4   0   5   53.87    2.33
   0  -4   5   57.34    2.40
  -4   0   5   54.48    2.34
   0  -4   5   55.47    2.21
   0   4   5   55.86    2.12
  -4   1  -5   58.59    2.51
  -1  -4  -5   60.18    2.37
  -4   1  -5   56.48    2.34
  -4   1   5   62.92    2.62
  -4   1   5   66.42    2.54
  -1  -4   5   60.94    2.68
   4  -1   5   62.15    2.51
   1   4   5   61.83    2.32
  -1  -4   5   65.61    2.48
  -4   2  -5  151.66    5.97
  -4   2  -5  160.73    5.90
  -2  -4  -5  167.53    5.98
  -2  -4   5  150.53    5.50
  -4   2   5  157.38    5.48
  -4   2   5  152.77    5.64
   4  -2   5  154.20    5.57
  -2  -4   5  136.68    5.71
  -4   3  -5  218.96    8.02
  -3  -4  -5  223.18    8.15
  -4   3  -5  217.97    8.07
   4  -3   5  218.44    7.93
  -4   3   5  219.30    7.98
  -3  -4   5  219.66    7.85
  -4   3   5  225.58    7.73
  -3  -4   5  202.36    8.10
  -4  -4  -5  116.01    4.51
  -4   4  -5  109.00    4.32
  -4   4  -5  110.15    4.30
   4  -4   5  112.37    4.34
  -4  -4   5  112.40    4.58
  -4  -4   5  111.96    4.25
  -4   4   5  113.62    4.37
  -4   5  -5   75.21    3.00
  -5  -4  -5   68.05    3.20
  -4   5  -5   72.47    3.00
  -5  -4   5   62.57    3.05
  -4   5   5   71.42    2.85
   4  -5   5   66.78    2.83
  -5  -4   5   66.99    2.76
  -3   5  -5  114.04    4.39
  -5  -3  -5  111.45    4.15
  -5  -3  -5  112.64    4.60
  -3   5  -5  117.17    4.37
  -5  -3   5   72.60    3.02
  -5  -3   5   73.39    3.27
   3  -5   5   74.54    3.02
  -3   5   5   77.03    3.01
  -5  -2  -5   55.28    2.19
  -2   5  -5   56.49    2.31
  -5  -2  -5   54.81    2.56
  -2   5  -5   56.13    2.38
   2  -5   5   33.41    1.59
  -2   5   5   33.49    1.54
  -5  -2   5   33.73    1.83
  -5  -2   5   32.36    1.68
   1  -5  -5   61.31    2.25
  -5  -1  -5   58.82    2.36
  -1   5  -5   57.68    2.52
  -5  -1  -5   61.33    2.68
  -1   5  -5   55.75    2.37
   1  -5   5   62.13    2.52
   1  -5   5   62.58    2.64
  -5  -1   5   61.53    2.64
  -5  -1   5   63.48    2.70
  -1   5   5   60.70    2.44
   0  -5  -5  153.11    5.56
  -5   0  -5  150.15    5.60
  -5   0  -5  155.12    5.82
   0   5  -5  149.51    5.77
   0   5   5  155.84    5.43
   0  -5   5  153.20    5.70
  -5   0   5  145.41    5.65
   0  -5   5  152.77    5.52
  -5   0   5  141.07    5.61
  -5   1  -5   62.79    2.77
  -1  -5  -5   65.67    2.62
  -5   1  -5   62.87    2.60
  -5   1   5   59.87    2.58
  -5   1   5   56.97    2.44
   1   5   5   59.22    2.22
  -1  -5   5   58.32    2.37
  -1  -5   5   62.14    2.65
  -5   2  -5   34.93    1.74
  -2  -5  -5   32.56    1.69
  -5   2  -5   31.03    1.61
  -2  -5   5   59.35    2.38
  -5   2   5   58.08    2.37
  -5   2   5   57.73    2.58
  -2  -5   5   61.34    2.70
  -3  -5  -5   75.29    3.18
  -5   3  -5   77.17    3.08
  -5   3  -5   71.69    3.09
  -3  -5   5  118.03    4.31
  -5   3   5  114.87    4.50
  -5   3   5  117.41    4.23
  -3  -5   5  106.89    4.62
  -5   4  -5   69.63    2.89
  -4  -5  -5   69.68    3.07
  -5   4  -5   64.49    2.87
  -4  -5   5   73.17    3.33
  -5   4   5   73.31    3.12
  -4  -5   5   74.60    2.94
  -5   5  -5  250.96    9.21
  -5   5  -5  250.88    9.25
  -5  -5  -5  251.14    9.47
  -5  -5   5  253.40    8.78
  -5   5   5  251.50    8.93
  -5  -5   5  217.11    9.10
  -5   6  -5   54.58    2.60
  -5   6  -5   57.50    2.54
  -6  -5  -5   61.34    3.01
  -6  -5   5   64.09    2.64
  -5   6   5   58.93    2.72
  -6  -5   5   59.33    3.10
  -6  -4  -5   64.71    3.22
  -4   6  -5   71.74    2.98
  -6  -4  -5   73.95    2.67
  -4   6  -5   67.45    2.91
  -4   6   5   76.98    3.14
  -6  -4   5   73.56    3.44
  -6  -4   5   77.22    3.13
   4  -6   5   72.68    3.14
  -6  -3  -5   40.61    2.19
  -6  -3  -5   35.53    1.61
  -3   6  -5   36.86    1.78
  -3   6  -5   34.84    1.78
  -6  -3   5   48.20    2.17
  -6  -3   5   41.05    2.33
   3  -6   5   49.30    2.15
  -3   6   5   45.34    2.08
  -6  -2  -5   50.84    2.54
  -2   6  -5   55.04    2.28
  -6  -2  -5   52.30    2.18
  -2   6  -5   53.13    2.34
  -2   6   5   40.33    1.77
  -6  -2   5   34.62    1.95
  -6  -2   5   39.63    2.11
   2  -6   5   39.44    1.91
   2  -6   5   39.72    1.84
  -1   6  -5  166.53    6.28
  -6  -1  -5  167.01    6.41
   1  -6  -5  168.28    6.00
  -1   6  -5  166.84    6.14
  -6  -1  -5  160.13    6.10
  -6  -1   5  176.33    6.51
  -6  -1   5  166.50    6.42
   1  -6   5  166.74    6.42
  -1   6   5  170.94    6.23
   1  -6   5  171.63    6.30
   0  -6  -5  113.15    4.13
   0   6  -5  107.92    4.35
  -6   0  -5  108.52    4.43
  -6   0  -5  106.39    4.19
   0  -6   5  113.61    4.38
  -6   0   5  106.19    4.32
   0   6   5  110.42    4.06
   0  -6   5  108.16    4.17
  -6   0   5  110.03    4.36
  -6   1  -5  175.40    6.64
  -1  -6  -5  172.73    6.48
  -6   1  -5  174.73    6.49
  -6   1   5  166.01    6.39
   1   6   5  169.80    6.04
  -6   1   5  160.66    6.27
  -1  -6   5  165.99    6.18
  -1  -6   5  179.16    6.48
  -6   2  -5   35.67    1.84
  -2  -6  -5   38.59    1.88
  -6   2  -5   36.61    1.95
  -2  -6   5   55.17    2.31
  -6   2   5   55.34    2.36
  -6   2   5   58.88    2.58
  -2  -6   5   55.15    2.64
  -3  -6  -5   50.52    2.43
  -6   3  -5   49.86    2.32
  -6   3  -5   48.60    2.35
  -6   3   5   38.13    1.71
  -6   3   5   37.61    2.00
  -3  -6   5   39.21    1.76
  -3  -6   5   39.90    2.19
  -6   4  -5   84.34    3.39
  -6   4  -5   78.97    3.38
  -4  -6  -5   76.57    3.53
  -6   4   5   71.34    3.15
  -4  -6   5   66.59    3.33
  -4  -6   5   73.35    2.90
  -6   4   5   74.26    2.76
  -6   5  -5   62.73    2.75
  -6   5  -5   64.20    2.83
  -5  -6  -5   57.56    2.99
  -5  -6   5   58.03    2.40
  -6   5   5   53.89    2.60
  -5  -6   5   53.79    2.86
  -6  -6  -5   79.51    3.80
  -6   6  -5   77.73    3.47
  -6   6  -5   82.17    3.38
  -6  -6   5   79.28    3.75
  -6   6   5   74.51    3.38
  -6  -6   5   78.45    3.19
  -6   7  -5   56.20    2.82
  -7  -6  -5   62.22    3.30
  -6   7  -5   57.73    2.65
  -7  -6   5   46.47    2.18
  -6   7   5   41.13    2.32
  -7  -6   5   45.01    2.83
  -5   7  -5   86.83    3.61
  -5   7  -5   88.19    3.50
  -7  -5  -5   75.59    3.88
  -7  -5   5   80.02    3.31
  -7  -5   5   77.02    3.75
  -5   7   5   77.58    3.38
  -4   7  -5  108.22    4.14
  -7  -4  -5   96.78    4.42
  -4   7  -5  103.47    4.05
  -7  -4  -5   98.68    3.85
   4  -7   5  106.67    4.35
  -4   7   5  109.22    4.34
  -7  -4   5  112.03    4.39
  -7  -4   5  108.16    4.70
  -7  -3  -5   64.03    3.15
  -3   7  -5   66.52    2.83
  -7  -3  -5   64.01    2.66
  -3   7  -5   68.96    2.84
   3  -7   5   72.29    3.04
  -7  -3   5   75.22    3.12
  -7  -3   5   62.88    3.28
  -3   7   5   76.23    3.00
  -2   7  -5   74.04    3.14
  -2   7  -5   77.88    3.08
  -7  -2  -5   73.03    3.01
  -7  -2  -5   74.40    3.44
  -7  -2   5   62.49    2.83
   2  -7   5   62.74    2.70
  -2   7   5   63.12    2.62
  -7  -2   5   65.18    3.01
   2  -7   5   63.20    2.78
  -1   7  -5  145.41    5.48
  -7  -1  -5  144.15    5.81
  -7  -1  -5  145.67    5.49
   1  -7  -5  145.49    5.36
  -1   7  -5  148.50    5.65
  -7  -1   5  175.40    6.60
  -1   7   5  176.35    6.34
  -7  -1   5  157.99    6.61
   1  -7   5  175.64    6.42
   1  -7   5  176.87    6.57
   0   7  -5  157.44    5.81
  -7   0  -5  150.42    5.88
   0   7  -5  163.83    6.08
  -7   0  -5  146.53    6.09
   0  -7  -5  161.74    5.81
  -7   0   5  164.48    6.13
  -7   0   5  158.12    6.13
   0  -7   5  158.37    6.11
   0  -7   5  157.06    5.92
   0   7   5  156.78    5.80
  -7   1  -5  164.00    6.73
  -1  -7  -5  188.33    6.60
  -7   1  -5  173.14    6.59
  -7   1   5  143.82    5.66
  -1  -7   5  145.99    5.41
  -1  -7   5  148.44    5.71
   1   7   5  148.29    5.25
  -7   1   5  136.30    5.52
  -7   2  -5   66.03    2.97
  -7   2  -5   67.24    2.86
  -2  -7  -5   60.97    2.84
  -2  -7   5   72.12    2.99
   2   7   5   74.54    2.77
  -2  -7   5   74.02    3.37
  -7   2   5   75.63    3.32
  -7   2   5   78.93    3.11
  -7   3  -5   79.46    3.32
  -7   3  -5   71.40    3.29
  -3  -7  -5   79.49    3.40
  -3  -7   5   70.51    2.85
  -7   3   5   71.57    2.87
  -7   3   5   71.14    3.18
  -3  -7   5   66.72    3.25
  -7   4  -5  109.41    4.61
  -4  -7  -5  114.83    4.80
  -7   4  -5  117.66    4.62
  -7   4   5  107.24    4.42
  -4  -7   5  102.91    4.58
  -7   4   5  107.75    4.03
  -4  -7   5  106.18    4.10
  -7   5  -5   82.97    3.59
  -5  -7  -5   80.17    3.79
  -7   5  -5   81.17    3.47
  -7   5   5   85.43    3.81
  -5  -7   5   90.00    4.10
  -5  -7   5   87.83    3.50
  -7   6  -5   47.92    2.36
  -6  -7  -5   46.76    2.78
  -7   6  -5   46.36    2.51
  -7   6   5   54.46    2.69
  -6  -7   5   53.39    2.34
  -6  -7   5   45.11    2.88
  -7   7  -5    5.77    1.08
  -7  -7  -5    5.64    1.47
  -7   7  -5    6.59    1.00
  -7  -7   5    6.96    0.93
  -7  -7   5    7.20    1.51
  -7   7   5    5.60    1.07
  -7   8  -5   26.57    2.09
  -8  -7  -5   29.76    2.75
  -8  -7   5   26.66    2.41
  -8  -7   5   25.05    1.73
  -7   8   5   27.75    2.09
  -6   8  -5   76.46    3.29
  -8  -6  -5   79.68    4.03
  -6   8  -5   73.58    3.48
  -6   8   5   78.03    3.53
  -8  -6   5   80.86    3.44
  -8  -6   5   76.77    4.04
  -8  -5  -5  138.68    5.93
  -5   8  -5  139.58    5.48
  -5   8  -5  133.02    5.31
  -8  -5   5  103.72    4.74
  -5   8   5  100.24    4.26
  -8  -5   5  107.13    4.29
  -4   8  -5  155.34    5.95
  -8  -4  -5  151.99    5.72
  -8  -4  -5  150.34    6.31
  -4   8  -5  154.59    5.87
  -8  -4   5  169.85    6.65
  -4   8   5  154.21    6.16
  -8  -4   5  161.93    6.27
  -3   8  -5   96.76    3.87
  -8  -3  -5   94.67    4.27
  -8  -3  -5   91.92    3.75
  -3   8  -5   96.00    3.88
  -8  -3   5   91.65    3.91
  -3   8   5   96.24    3.76
   3  -8   5   93.65    3.81
  -8  -3   5   88.53    4.16
  -2   8  -5  108.50    4.32
  -8  -2  -5  100.18    4.61
  -2   8  -5  111.81    4.26
   2  -8  -5  109.58    3.98
  -8  -2  -5  106.32    4.23
  -8  -2   5  105.69    4.63
  -8  -2   5  108.55    4.47
  -2   8   5  113.00    4.24
   2  -8   5  108.48    4.40
   2  -8   5  109.60    4.32
  -8  -1  -5  225.16    8.35
  -8  -1  -5  238.98    8.71
  -1   8  -5  218.14    8.30
  -1   8  -5  227.36    8.49
   1  -8  -5  221.78    8.20
  -1   8   5  224.87    8.01
   1  -8   5  210.56    8.22
  -8  -1   5  229.40    8.40
   1  -8   5  217.30    8.09
  -8  -1   5  214.86    8.30
   0  -8  -5  247.87    9.01
  -8   0  -5  240.31    9.09
   0   8  -5  240.00    8.99
  -8   0  -5  250.13    9.37
   0   8  -5  254.64    9.28
   0  -8   5  236.93    8.89
  -8   0   5  238.54    8.91
   0   8   5  237.77    8.55
   0  -8   5  229.94    8.66
  -8   0   5  241.72    8.94
   1   8  -5  220.40    7.93
  -8   1  -5  220.29    8.10
  -8   1  -5  203.81    8.24
  -1  -8  -5  219.16    8.05
  -1  -8   5  223.81    8.32
  -1  -8   5  222.73    8.02
  -8   1   5  222.48    8.31
  -8   1   5  206.59    8.17
   1   8   5  217.41    7.85
  -8   2  -5  112.39    4.73
  -8   2  -5  117.26    4.67
  -2  -8  -5  116.07    4.68
  -2  -8   5  109.30    4.22
   2   8   5  108.44    3.99
  -8   2   5  107.18    4.35
  -8   2   5  111.58    4.58
  -2  -8   5  109.14    4.60
  -3  -8  -5   95.90    4.16
  -8   3  -5  101.14    4.13
  -8   3  -5   96.25    4.14
  -8   3   5  107.05    4.34
  -8   3   5   94.67    3.96
  -3  -8   5   97.94    4.37
  -3  -8   5  103.63    3.93
  -8   4  -5  167.99    6.57
  -8   4  -5  167.46    6.53
  -4  -8  -5  167.85    6.70
  -8   4   5  163.17    6.02
  -4  -8   5  162.86    6.58
  -8   4   5  154.36    6.37
  -4  -8   5  163.47    6.03
  -8   5  -5  104.87    4.56
  -8   5  -5  107.32    4.45
  -5  -8  -5  109.91    4.78
  -5  -8   5  134.82    5.16
  -8   5   5  136.43    5.55
  -5  -8   5  134.84    5.79
  -8   6  -5   80.89    3.78
  -8   6  -5   84.82    3.63
  -6  -8  -5   79.72    4.05
  -6  -8   5   76.50    3.95
  -6  -8   5   74.80    3.18
  -8   6   5   76.98    3.60
  -7  -8  -5   25.72    2.41
  -8   7  -5   28.50    2.19
  -7  -8   5   24.92    2.36
  -8   7   5   23.81    1.93
  -7  -8   5   24.58    1.65
  -8  -8  -5   15.43    2.06
  -8   8  -5   17.64    1.77
  -8  -8   5   15.64    2.07
  -8   8   5   12.94    1.50
  -8   9  -5   34.75    2.54
  -8   9   5   30.73    2.36
  -9  -8   5   30.34    2.76
  -7   9  -5   39.59    2.57
  -9  -7  -5   43.46    3.33
  -7   9   5   39.02    2.45
  -9  -7   5   38.04    3.01
  -6   9  -5   68.54    3.39
  -9  -6  -5   73.03    4.03
  -9  -6   5   70.88    3.90
  -9  -6   5   69.91    3.28
  -6   9   5   76.68    3.43
  -9  -5  -5   82.05    4.27
  -5   9  -5   86.06    3.77
  -5   9   5   70.21    3.32
  -9  -5   5   76.60    3.41
  -9  -5   5   74.72    3.94
  -4   9  -5  104.64    4.29
  -9  -4  -5  109.81    4.89
  -4   9  -5  101.82    4.16
  -9  -4  -5   92.97    4.57
  -4   9   5  108.18    4.36
  -9  -4   5  104.03    4.83
  -9  -4   5  108.14    4.53
  -9  -3  -5  119.63    5.17
  -3   9  -5  114.97    4.62
  -3   9  -5  116.60    4.65
  -9  -3  -5  109.79    4.53
  -9  -3   5  102.36    4.61
   3  -9   5  100.39    4.15
  -9  -3   5   96.92    4.29
  -3   9   5  103.42    4.08
  -9  -2  -5  116.90    5.15
  -2   9  -5  119.15    4.71
  -9  -2  -5  120.78    4.74
  -2   9  -5  118.69    4.78
   2  -9   5  120.73    4.82
  -9  -2   5  120.38    4.92
   2  -9   5  124.14    4.75
  -2   9   5  123.43    4.65
  -9  -2   5  108.23    5.06
  -9  -1  -5  186.77    7.38
  -1   9  -5  193.04    7.32
  -1   9  -5  198.59    7.52
   1  -9  -5  195.72    7.22
  -9  -1  -5  207.01    7.82
  -9  -1   5  215.57    8.09
   1  -9   5  199.62    7.73
   1  -9   5  205.59    7.89
  -1   9   5  207.19    7.63
  -9  -1   5  211.22    8.01
   0  -9  -5  177.95    6.70
   0   9  -5  175.11    6.66
   0   9  -5  184.09    6.97
  -9   0  -5  177.60    7.08
  -9   0  -5  175.05    6.81
   0  -9   5  169.55    6.45
  -9   0   5  173.71    6.79
  -9   0   5  173.75    6.76
   0  -9   5  170.88    6.70
   0   9   5  169.97    6.31
  -1  -9  -5  225.20    8.07
   1   9  -5  210.93    7.89
  -9   1  -5  197.74    8.25
  -9   1  -5  220.78    8.11
  -9   1   5  197.99    7.39
  -1  -9   5  186.26    7.01
   1   9   5  190.83    6.84
  -9   1   5  178.85    7.21
  -1  -9   5  187.73    7.33
  -2  -9  -5  127.51    5.19
  -9   2  -5  136.14    5.25
   2   9  -5  124.07    4.90
  -9   2  -5  126.71    5.29
  -9   2   5  119.36    4.91
  -2  -9   5  118.62    4.73
  -9   2   5  127.08    5.17
  -2  -9   5  127.02    5.16
  -9   3  -5  104.87    4.54
  -9   3  -5  111.65    4.57
  -3  -9  -5  105.90    4.59
  -9   3   5  111.77    4.58
  -3  -9   5  113.52    4.46
  -3  -9   5  118.20    5.00
  -9   3   5  117.92    4.94
  -9   4  -5  116.05    4.90
  -9   4  -5  118.38    4.96
  -4  -9  -5  119.27    5.11
  -9   4   5  106.11    4.61
  -4  -9   5  104.56    4.11
  -4  -9   5  102.25    4.71
  -5  -9  -5   74.75    3.93
  -9   5  -5   84.00    3.81
  -9   5  -5   81.91    3.66
  -5  -9   5   88.33    3.53
  -9   5   5   86.01    4.04
  -5  -9   5   84.67    4.26
  -9   6  -5   83.45    3.75
  -6  -9  -5   80.82    4.18
  -9   6  -5   84.54    3.96
  -6  -9   5   54.43    3.44
  -9   6   5   66.77    3.28
  -9   7  -5   37.51    2.68
  -7  -9  -5   44.30    3.14
  -9   7   5   36.87    2.54
  -7  -9   5   33.57    3.01
  -9   8  -5   36.81    2.70
  -8  -9  -5   35.24    3.17
  -9   8   5   29.34    2.46
  -8  -9   5   31.80    2.84
  -9  -9  -5   31.33    3.04
  -9   9  -5   26.72    2.26
  -9   9   5   29.53    2.50
 -10  -9  -5   15.16    2.44
  -9  10  -5    7.44    1.60
  -9  10   5    8.66    1.58
 -10  -9   5   11.90    2.39
 -10  -8  -5    9.05    2.23
  -8  10  -5    8.21    1.50
 -10  -8   5    6.52    1.91
  -8  10   5    4.56    1.26
 -10  -7  -5   34.06    3.07
  -7  10  -5   19.84    1.88
  -7  10   5   26.23    2.04
 -10  -7   5   30.55    2.86
  -6  10  -5   47.52    2.72
 -10  -6  -5   45.14    3.48
 -10  -6   5   46.36    3.29
 -10  -6   5   42.41    2.75
  -6  10   5   34.46    2.40
 -10  -5  -5  100.57    5.04
  -5  10  -5  104.66    4.44
  -5  10   5  119.28    4.78
 -10  -5   5  108.40    5.34
 -10  -5   5  113.97    4.86
  -4  10  -5   77.43    3.51
 -10  -4  -5   75.62    4.06
 -10  -4   5   58.89    3.09
  -4  10   5   63.12    2.85
 -10  -4   5   56.14    3.40
  -3  10  -5   49.67    2.52
 -10  -3  -5   45.40    2.47
 -10  -3  -5   57.09    3.30
  -3  10  -5   46.95    2.43
  -3  10   5   61.39    2.78
 -10  -3   5   59.77    3.41
 -10  -3   5   61.70    3.10
  -2  10  -5   83.01    3.60
 -10  -2  -5   75.21    4.04
  -2  10  -5   85.48    3.56
 -10  -2  -5   84.57    3.63
  -2  10   5   76.99    3.14
   2 -10   5   74.26    3.32
   2 -10   5   74.57    3.29
 -10  -2   5   66.66    3.50
 -10  -2   5   74.96    3.73
  -1  10  -5   71.15    3.11
 -10  -1  -5   72.13    3.72
 -10  -1  -5   73.58    3.32
  -1  10  -5   69.82    3.30
  -1  10   5   80.92    3.25
 -10  -1   5   73.86    3.75
   1 -10   5   77.15    3.53
 -10  -1   5   84.76    3.80
   1 -10   5   80.18    3.42
 -10   0  -5  280.22   10.35
   0 -10  -5  279.49   10.21
   0  10  -5  287.48   10.50
 -10   0  -5  266.34   10.60
   0  10  -5  270.70   10.16
   0 -10   5  261.83    9.64
   0 -10   5  263.75    9.90
 -10   0   5  262.97    9.97
 -10   0   5  267.96    9.99
   0  10   5  254.04    9.49
 -10   1  -5   81.64    3.73
 -10   1  -5   83.02    3.92
  -1 -10  -5   80.57    3.58
   1  10  -5   82.58    3.41
 -10   1   5   63.85    3.26
  -1 -10   5   69.93    3.31
 -10   1   5   71.81    3.50
  -1 -10   5   71.80    3.00
   2  10  -5   80.03    3.32
 -10   2  -5   76.48    3.70
 -10   2  -5   80.28    3.84
  -2 -10  -5   81.57    3.66
  -2 -10   5   90.72    4.10
 -10   2   5   84.82    4.10
  -2 -10   5   84.64    3.58
 -10   2   5   89.76    3.85
 -10   3  -5   60.16    3.20
  -3 -10  -5   62.29    3.17
 -10   3  -5   62.91    3.18
   3  10  -5   63.25    2.71
  -3 -10   5   50.35    2.97
 -10   3   5   50.13    2.97
  -3 -10   5   50.13    2.36
 -10   3   5   49.95    2.54
 -10   4  -5   66.65    3.40
  -4 -10  -5   64.03    3.41
 -10   4  -5   64.21    3.25
  -4 -10   5   72.79    3.17
  -4 -10   5   76.35    3.86
 -10   4   5   76.16    3.79
 -10   5  -5  123.20    5.27
 -10   5  -5  119.23    5.09
  -5 -10  -5  120.59    5.41
 -10   5   5  105.55    4.79
  -5 -10   5  104.15    4.96
 -10   6  -5   40.58    2.89
  -6 -10  -5   44.69    3.10
  -6 -10   5   42.86    3.22
 -10   6   5   43.02    2.87
 -10   7  -5   21.31    2.07
  -7 -10  -5   30.21    2.78
 -10   7   5   22.96    2.10
  -7 -10   5   22.35    2.44
 -10   8  -5    4.95    1.51
  -8 -10  -5    3.20    1.81
 -10   8   5    9.95    1.64
  -8 -10   5   10.60    2.15
  -9 -10  -5   11.07    2.24
 -10   9  -5   10.20    1.76
  -9 -10   5   12.89    2.37
 -10   9   5    8.71    1.65
 -10  10  -5    8.77    1.78
 -10 -10  -5    9.80    2.41
 -10 -10   5   13.00    2.50
 -10  10   5    9.47    1.65
 -10  11  -5    3.32    1.63
 -11 -10  -5    8.39    2.43
 -11 -10   5    2.97    2.24
 -10  11   5    1.85    1.47
  -9  11  -5   12.05    1.92
 -11  -9  -5   17.34    2.77
  -9  11   5   17.03    1.95
  -8  11  -5   17.00    1.89
 -11  -8   5   19.62    2.63
  -8  11   5   19.50    2.00
  -7  11  -5    7.48    1.42
 -11  -7  -5    8.44    2.17
 -11  -7   5   12.06    2.23
  -7  11   5   10.09    1.47
 -11  -6  -5   21.76    2.70
  -6  11  -5   27.58    2.24
  -6  11   5   26.97    2.02
 -11  -6   5   26.75    2.76
  -5  11  -5   56.84    3.02
 -11  -5  -5   55.91    3.75
 -11  -5   5   56.91    3.68
 -11  -5   5   51.75    2.97
  -5  11   5   51.23    2.79
  -4  11  -5   49.37    2.70
 -11  -4  -5   50.59    3.55
  -4  11   5   45.63    2.47
 -11  -4   5   49.11    3.33
 -11  -4   5   44.16    2.78
 -11  -3  -5   88.21    4.57
  -3  11  -5   85.01    3.81
  -3  11   5   65.93    3.06
 -11  -3   5   65.33    3.43
 -11  -3   5   72.32    3.81
  -2  11  -5   77.30    3.84
  -2  11  -5   88.43    3.61
 -11  -2  -5   75.87    3.65
 -11  -2  -5   81.26    4.28
  -2  11   5   76.05    3.21
 -11  -2   5   73.16    3.87
   2 -11   5   73.82    3.44
 -11  -2   5   73.29    3.70
 -11  -1  -5   75.51    3.59
  -1  11  -5   80.80    3.61
 -11  -1  -5   74.29    4.06
  -1  11  -5   79.18    3.41
   1 -11   5   67.69    3.07
  -1  11   5   66.71    2.90
 -11  -1   5   66.09    3.52
 -11  -1   5   64.96    3.53
   1 -11   5   65.31    3.20
   0  11  -5   80.29    3.84
   0  11  -5   85.44    3.54
 -11   0  -5   83.24    4.15
 -11   0  -5   79.58    3.80
 -11   0   5   86.73    4.04
   0 -11   5   78.90    3.80
 -11   0   5   81.84    3.98
   0 -11   5   83.48    3.56
   1  11  -5   70.20    3.09
 -11   1  -5   66.69    3.46
 -11   1  -5   69.06    3.68
   1  11  -5   76.51    3.63
 -11   1   5   79.39    4.05
  -1 -11   5   81.72    3.77
 -11   1   5   73.61    3.71
  -1 -11   5   80.86    3.41
  -2 -11  -5   79.21    3.68
   2  11  -5   80.39    3.33
 -11   2  -5   80.55    3.84
 -11   2  -5   72.51    3.83
 -11   2   5   84.42    4.18
  -2 -11   5   82.62    4.04
 -11   2   5   87.01    3.89
  -2 -11   5   84.23    3.56
 -11   3  -5   69.37    3.58
 -11   3  -5   67.38    3.53
  -3 -11  -5   68.49    3.50
  -3 -11   5   82.45    3.67
 -11   3   5   80.99    4.12
  -3 -11   5   82.53    4.08
  -4 -11  -5   46.05    2.93
 -11   4  -5   45.31    2.76
 -11   4  -5   44.99    2.97
 -11   4   5   47.96    3.11
  -4 -11   5   45.92    3.08
  -5 -11  -5   50.51    3.35
 -11   5  -5   57.78    3.28
 -11   5   5   63.95    3.59
  -5 -11   5   58.04    3.62
 -11   6  -5   32.52    2.56
  -6 -11  -5   31.31    2.96
  -6 -11   5   25.78    2.57
 -11   6   5   23.02    2.22
  -7 -11  -5    9.93    2.03
 -11   7  -5   10.02    1.77
 -11   7   5    7.87    1.67
  -7 -11   5    9.54    2.04
  -8 -11  -5   17.72    2.47
 -11   8  -5   20.94    2.18
  -8 -11   5   15.80    2.51
 -11   8   5   15.16    1.96
 -11   9  -5   16.17    2.15
  -9 -11  -5   20.21    2.83
 -11   9   5   12.61    1.92
  -9 -11   5   19.12    2.76
 -10 -11  -5    8.24    2.36
 -11  10  -5    4.36    1.72
 -11  10   5    0.84    1.56
 -10 -11   5    1.76    2.13
 -11  11  -5    1.45    1.74
 -11 -11  -5   -0.41    2.23
 -11  11   5    4.26    1.73
 -11 -11   5    9.35    2.71
 -11  12  -5    6.70    3.01
 -12 -11  -5    6.77    2.81
 -11  12   5    2.02    1.79
 -10  12  -5    2.88    1.69
 -12 -10  -5    4.41    2.58
 -12 -10   5    4.84    2.49
 -10  12   5    2.96    1.55
  -9  12  -5   16.72    2.16
 -12  -9  -5   27.39    3.33
  -9  12   5   14.28    1.95
 -12  -9   5   15.25    2.83
 -12  -8  -5   18.92    3.01
  -8  12  -5   15.03    1.95
  -8  12   5   19.94    2.04
 -12  -7  -5   19.48    2.74
  -7  12  -5   10.95    1.65
  -7  12   5   11.61    1.62
 -12  -7   5   14.76    2.51
 -12  -6  -5   35.27    3.33
  -6  12  -5   35.37    2.61
  -6  12   5   33.19    2.49
 -12  -6   5   39.58    3.61
  -5  12  -5   51.24    2.94
 -12  -5  -5   51.24    3.98
 -12  -5   5   54.89    3.85
  -5  12   5   47.75    2.79
 -12  -4  -5   68.03    4.27
  -4  12  -5   63.91    3.32
 -12  -4   5   68.49    4.01
 -12  -4   5   58.48    3.38
  -4  12   5   62.94    3.11
  -3  12  -5   37.32    2.35
 -12  -3  -5   35.13    3.15
 -12  -3   5   34.30    2.98
 -12  -3   5   35.57    2.62
  -3  12   5   34.40    2.12
  -2  12  -5   42.93    2.49
 -12  -2  -5   43.65    3.65
 -12  -2  -5   47.07    3.40
 -12  -2   5   39.05    2.87
 -12  -2   5   47.03    3.15
 -12  -1  -5  113.09    5.32
  -1  12  -5  111.49    4.56
 -12  -1  -5  103.18    4.76
 -12  -1   5  109.44    5.02
 -12  -1   5  105.85    4.99
   0  12  -5   69.31    3.15
   0  12  -5   68.22    3.52
 -12   0  -5   69.65    3.88
 -12   0  -5   66.79    3.61
   0 -12   5   63.66    3.39
 -12   0   5   69.22    3.64
   0 -12   5   68.91    3.14
 -12   0   5   62.17    3.71
 -12   1  -5  114.39    5.33
 -12   1  -5  110.34    5.11
   1  12  -5  114.65    4.66
   1  12  -5  117.58    5.15
 -12   1   5  109.94    5.12
  -1 -12   5  106.42    4.83
 -12   1   5  102.28    4.81
  -1 -12   5  113.42    4.48
 -12   2  -5   54.28    3.23
 -12   2  -5   51.73    3.21
  -2 -12   5   42.37    2.82
 -12   2   5   43.78    3.13
 -12   2   5   43.68    2.93
 -12   3  -5   37.97    2.86
 -12   3  -5   41.01    2.93
  -3 -12  -5   40.10    2.72
 -12   3   5   36.28    2.96
  -3 -12   5   36.41    2.76
  -4 -12  -5   69.70    3.73
 -12   4  -5   65.83    3.67
 -12   4  -5   66.25    3.78
  -4 -12   5   65.03    3.88
 -12   4   5   67.06    3.83
  -5 -12  -5   55.17    3.64
 -12   5  -5   57.23    3.64
  -5 -12   5   44.87    3.34
 -12   5   5   46.93    3.35
 -12   6  -5   39.13    3.25
  -6 -12  -5   38.72    3.37
  -6 -12   5   34.25    3.23
 -12   6   5   37.40    2.98
 -12   7  -5   12.54    2.01
  -7 -12  -5   12.97    2.23
 -12   7   5   10.67    2.04
  -7 -12   5   15.20    2.44
  -8 -12  -5   19.23    2.66
 -12   8  -5   19.60    2.33
 -12   8   5   18.58    2.28
  -8 -12   5   18.04    2.69
 -12   9  -5   13.80    2.25
  -9 -12  -5   13.61    2.61
  -9 -12   5   14.82    2.69
 -12   9   5   12.14    2.08
 -12  10  -5    3.72    1.82
 -10 -12  -5    1.17    2.29
 -12  10   5    2.21    1.78
 -10 -12   5   10.06    2.67
 -11 -12  -5    5.56    2.62
 -11 -12   5    5.03    2.92
 -12  11   5    3.53    2.37
  -9  13  -5    8.85    1.92
 -13  -9  -5   15.74    3.11
  -9  13   5    7.43    1.67
 -13  -9   5   16.18    2.95
 -13  -8  -5   32.58    3.56
  -8  13  -5   23.83    2.39
  -8  13   5   23.34    2.22
 -13  -8   5   25.95    3.28
  -7  13  -5    7.37    1.63
 -13  -7  -5   11.57    2.70
  -7  13   5    7.74    1.55
 -13  -7   5   10.37    2.39
 -13  -6  -5   35.46    3.52
  -6  13  -5   36.72    2.72
  -6  13   5   37.41    2.69
 -13  -6   5   35.40    3.47
  -5  13  -5   43.14    2.90
 -13  -5  -5   50.57    4.22
  -5  13   5   51.69    2.97
 -13  -5   5   52.39    4.02
 -13  -4  -5   78.79    4.89
  -4  13  -5   74.06    3.78
  -4  13   5   64.81    3.34
 -13  -4   5   71.34    4.33
  -3  13  -5   61.41    3.26
 -13  -3  -5   64.98    4.27
 -13  -3   5   56.79    3.47
 -13  -3   5   63.04    3.96
  -2  13  -5   60.95    3.19
 -13  -2  -5   66.27    4.18
 -13  -2   5   67.94    3.79
 -13  -2   5   65.92    3.97
 -13  -1  -5   97.98    4.76
 -13  -1  -5  107.82    5.39
  -1  13  -5  110.07    4.57
 -13  -1   5   92.46    4.54
 -13  -1   5   78.00    4.32
 -13   0  -5   73.84    3.90
 -13   0  -5   77.73    4.35
 -13   0   5   89.88    4.60
 -13   0   5   79.05    4.28
   1  13  -5   97.43    5.38
 -13   1  -5   97.45    4.78
 -13   1  -5  105.51    5.14
 -13   1   5   94.61    4.62
 -13   1   5   92.99    4.89
  -1 -13   5   98.67    4.68
 -13   2  -5   80.08    4.20
 -13   2  -5   71.40    4.09
   2  13  -5   76.98    4.10
  -2 -13   5   63.36    3.62
 -13   2   5   61.07    3.88
 -13   3  -5   63.98    3.86
 -13   3  -5   68.74    3.86
  -3 -13   5   59.77    3.69
 -13   3   5   61.96    3.90
 -13   4  -5   72.50    4.18
 -13   4   5   70.44    4.45
  -4 -13   5   79.19    4.39
 -13   5  -5   46.39    3.46
  -5 -13  -5   51.01    3.59
  -5 -13   5   47.38    3.54
 -13   5   5   46.78    3.63
  -6 -13  -5   35.58    3.32
 -13   6  -5   36.92    2.99
 -13   6   5   32.79    2.97
  -6 -13   5   33.31    3.21
 -13   7  -5    9.37    2.15
  -7 -13  -5   10.91    2.33
  -7 -13   5   10.41    2.30
 -13   7   5    9.13    2.13
  -8 -13  -5   31.13    3.37
 -13   8  -5   32.54    3.05
 -13   8   5   29.04    2.82
  -8 -13   5   23.28    3.03
 -13   9  -5    9.36    2.24
  -9 -13  -5   10.88    2.65
 -13   9   5   13.77    2.34
  -9 -13   5   12.78    2.72
  -8  14  -5    8.27    1.85
 -14  -8  -5    8.15    3.12
 -14  -8   5    9.29    2.80
  -8  14   5   10.86    1.84
 -14  -7  -5   23.99    3.33
  -7  14  -5   22.74    2.27
 -14  -7   5   20.25    3.10
  -7  14   5   23.78    2.26
  -6  14  -5   15.82    1.95
 -14  -6  -5   18.30    3.19
  -6  14   5   10.82    1.69
 -14  -6   5   21.14    2.93
  -5  14  -5   38.64    2.87
 -14  -5  -5   41.68    3.90
 -14  -5   5   43.75    4.02
 -14  -4  -5   57.09    4.67
  -4  14  -5   58.73    3.33
 -14  -4   5   52.20    4.04
  -3  14  -5   44.26    2.90
 -14  -3  -5   54.42    4.18
 -14  -3   5   37.42    3.25
 -14  -2  -5   52.82    4.07
  -2  14  -5   52.82    3.02
 -14  -2   5   46.43    3.46
 -14  -2   5   46.57    3.54
 -14  -1  -5   66.54    4.39
 -14  -1   5   60.12    3.81
 -14  -1   5   60.97    3.90
 -14   0  -5   62.28    4.20
 -14   0  -5   56.46    3.72
 -14   0   5   56.37    3.90
 -14   0   5   58.26    3.71
 -14   1  -5   57.53    3.86
 -14   1  -5   72.99    4.32
 -14   1   5   60.71    3.92
 -14   2  -5   44.31    3.39
 -14   2  -5   49.62    3.64
 -14   2   5   50.09    3.85
 -14   3  -5   47.52    3.60
 -14   3   5   42.69    3.42
  -3 -14   5   43.46    3.30
 -14   4  -5   54.39    3.77
 -14   4   5   60.29    4.23
  -4 -14   5   50.51    3.66
 -14   5  -5   44.57    3.63
 -14   5   5   34.96    3.22
  -5 -14   5   37.38    3.30
 -14   6  -5   17.01    2.43
 -14   6   5   25.04    2.81
  -6 -14   5   17.41    2.63
 -14   7  -5   23.65    2.88
  -7 -14  -5   19.49    2.87
 -14   7   5   21.52    2.75
  -7 -14   5   16.38    2.76
  -8 -14  -5   10.06    2.72
 -14   8  -5   11.37    2.44
 -14   8   5   11.22    2.58
  -8 -14   5    8.71    2.56
  -6  15  -5   14.30    2.03
 -15  -6  -5   19.20    3.26
 -15  -6   5   12.31    2.69
  -5  15  -5   29.02    2.45
 -15  -5  -5   24.59    3.42
 -15  -5   5   30.49    3.46
 -15  -4  -5   29.86    3.62
  -4  15  -5   22.75    2.18
 -15  -4   5   31.84    3.39
 -15  -3  -5   31.31    3.56
 -15  -3   5   25.72    2.96
 -15  -2  -5   22.23    3.00
 -15  -2   5   21.69    2.63
 -15  -1  -5   34.64    3.35
 -15  -1   5   30.52    2.90
 -15  -1   5   24.70    2.67
 -15   0  -5   34.67    3.36
 -15   0   5   30.28    2.93
 -15   1  -5   30.97    3.10
 -15   1  -5   27.78    2.71
 -15   1   5   29.83    3.01
 -15   2  -5   26.25    2.81
 -15   2   5   17.04    2.51
 -15   3  -5   27.67    2.85
 -15   3   5   26.03    2.91
 -15   4  -5   23.09    2.72
 -15   4   5   26.02    3.01
 -15   5  -5   30.34    3.05
  -5 -15   5   29.87    3.08
 -15   5   5   30.51    3.28
 -15   6  -5   14.02    2.52
 -15   6   5   10.61    2.54
  -6 -15   5   14.90    2.73
 -16  -3  -5   26.80    3.55
 -16  -3   5   21.82    2.98
 -16  -2  -5   29.42    3.55
 -16  -2   5   24.82    3.01
 -16  -1  -5    9.64    2.65
 -16   0  -5   25.80    3.11
 -16   0   5   22.62    2.76
 -16   1   5   10.63    2.38
 -16   2  -5   29.96    3.10
 -16   2   5   21.29    2.83
 -16   3  -5   19.82    2.78
 -16   3   5   22.25    2.96
   0   0  -6    0.29    0.33
   0   0   6    0.43    0.25
   0   1  -6  180.73    6.96
   1   0  -6  188.25    6.94
   0  -1  -6  198.43    6.93
  -1   0  -6  200.66    6.99
   0  -1   6  202.09    7.08
   0  -1   6  184.12    7.17
  -1   0   6  201.87    7.16
  -1   0   6  198.62    7.10
   1   0   6  197.62    7.05
   0   1   6  203.21    7.05
   1  -1  -6  178.27    6.21
  -1   1  -6  168.89    6.30
   1   1  -6  173.14    6.32
  -1  -1  -6  168.76    6.28
  -1  -1   6  181.29    6.80
   1  -1   6  181.72    6.67
  -1   1   6  187.07    6.70
   1   1   6  192.35    6.62
  -1  -1   6  189.03    6.70
  -2  -1  -6  822.65   28.43
  -1   2  -6  780.20   28.42
   1  -2  -6  813.27   28.26
  -1   2   6  725.84   25.29
  -2  -1   6  725.61   25.33
   1  -2   6  733.98   25.30
  -2  -1   6  689.90   25.42
   2   1   6  720.47   25.21
   0   2  -6  214.83    7.93
   0  -2  -6  228.54    7.82
  -2   0  -6  210.21    7.92
  -2   0   6  231.04    8.44
  -2   0   6  250.20    8.50
   0  -2   6  235.29    8.40
   2   0   6  244.66    8.37
   0  -2   6  215.54    8.52
   0   2   6  234.19    8.35
  -2   1  -6  681.30   24.96
   2  -1  -6  735.17   24.86
  -1  -2  -6  714.03   24.91
   1   2  -6  694.08   25.00
  -2   1   6  801.18   29.06
  -1  -2   6  826.17   29.03
   1   2   6  836.92   28.93
   2  -1   6  846.26   29.02
  -1  -2   6  805.46   29.18
  -2   1   6  840.18   29.04
  -2   2  -6   34.39    1.65
  -2  -2  -6   38.84    1.69
   2  -2  -6   35.59    1.43
  -2  -2   6   39.90    1.84
   2   2   6   37.89    1.43
  -2   2   6   37.56    1.66
   2  -2   6   40.51    1.64
  -2  -2   6   36.40    1.62
   2  -3  -6  175.23    6.37
   2  -3  -6  183.82    6.37
  -2   3  -6  177.99    6.64
  -3  -2  -6  177.99    6.37
  -3  -2  -6  185.49    6.70
  -2   3  -6  178.96    6.54
   2  -3   6  233.21    8.23
  -2   3   6  240.07    8.25
  -3  -2   6  234.63    8.25
   3   2   6  219.58    8.05
  -3  -2   6  212.91    8.38
  -1   3  -6   11.68    0.93
  -3  -1  -6   13.11    0.69
  -3  -1  -6   13.18    1.02
   1  -3  -6   15.10    0.71
   1  -3   6   12.10    0.81
   3   1   6   11.20    0.65
  -3  -1   6   11.71    0.86
  -1   3   6   11.88    0.76
   1  -3   6   10.34    0.94
  -3  -1   6   12.25    0.98
   0  -3  -6  554.45   18.65
  -3   0  -6  491.42   18.79
  -3   0  -6  546.55   18.62
   0   3  -6  520.11   18.82
   0  -3   6  523.77   18.94
   0  -3   6  538.38   18.79
  -3   0   6  516.95   18.86
  -3   0   6  532.66   18.85
   0   3   6  531.59   18.72
   3   0   6  547.89   18.75
  -3   1  -6   12.24    0.77
  -1  -3  -6   11.48    0.85
  -3   1  -6   12.94    1.00
  -1  -3   6   16.32    1.11
  -1  -3   6   13.99    0.84
   1   3   6   14.53    0.66
  -3   1   6   13.85    0.87
   3  -1   6   14.05    0.84
  -3   1   6   13.80    0.98
  -3   2  -6  238.27    8.38
  -3   2  -6  231.28    8.50
  -2  -3  -6  227.81    8.46
  -2  -3   6  185.96    6.86
  -3   2   6  184.76    6.56
   3  -2   6  181.83    6.64
  -2  -3   6  179.95    6.62
  -3   2   6  180.60    6.70
  -3   3  -6   49.78    2.20
  -3  -3  -6   48.02    2.26
  -3   3  -6   53.85    2.14
   3  -3   6   53.21    2.19
  -3  -3   6   52.96    2.16
  -3  -3   6   50.23    2.38
  -3   3   6   52.02    2.22
  -3   4  -6  270.68    9.47
  -4  -3  -6  238.52    9.53
  -3   4  -6  267.61    9.39
  -4  -3   6  298.34   10.71
  -3   4   6  304.62   10.74
   3  -4   6  303.17   10.73
  -4  -3   6  282.88   10.91
  -2   4  -6    5.06    0.66
  -4  -2  -6    3.11    0.68
  -2   4  -6    2.99    0.49
  -4  -2  -6    4.92    0.42
  -4  -2   6    5.82    0.70
   2  -4   6    6.49    0.65
  -4  -2   6    8.68    0.94
  -2   4   6    9.54    0.73
  -4  -1  -6  585.77   20.16
   1  -4  -6  595.25   20.12
  -4  -1  -6  541.40   20.41
  -1   4  -6  565.96   20.37
  -1   4   6  595.01   20.46
   1  -4   6  559.00   20.62
   1  -4   6  594.46   20.50
  -4  -1   6  563.40   20.55
  -4  -1   6  584.72   20.64
  -4   0  -6   12.34    1.04
   0  -4  -6   11.12    0.75
  -4   0  -6   11.89    0.80
   0   4  -6   11.64    0.98
   4   0   6    9.92    0.75
   0  -4   6   12.06    1.04
   0   4   6   12.45    0.71
  -4   0   6   13.16    0.99
  -4   0   6   12.07    0.93
   0  -4   6   11.07    0.84
  -4   1  -6  574.90   20.45
  -4   1  -6  556.90   20.61
  -1  -4  -6  603.81   20.51
  -4   1   6  632.38   21.24
  -1  -4   6  600.69   21.19
   1   4   6  572.65   21.04
   4  -1   6  584.46   21.20
  -1  -4   6  629.43   21.43
  -4   1   6  581.51   21.29
  -2  -4  -6   10.36    0.87
  -4   2  -6    8.97    0.76
  -4   2  -6    8.01    0.85
  -2  -4   6    4.63    0.53
  -2  -4   6    5.74    0.86
   4  -2   6    5.04    0.60
  -4   2   6    3.46    0.63
  -4   2   6    4.52    0.51
  -4   3  -6  308.91   11.06
  -4   3  -6  299.37   10.96
  -3  -4  -6  304.29   11.08
  -4   3   6  278.85    9.64
  -3  -4   6  256.80   10.04
  -4   3   6  274.34    9.89
   4  -3   6  275.66    9.84
  -3  -4   6  271.88    9.77
  -4  -4  -6   70.43    3.14
  -4   4  -6   74.27    3.02
  -4   4  -6   71.07    2.95
  -4  -4   6   67.52    3.21
  -4  -4   6   73.29    2.90
  -4   4   6   74.56    3.02
   4  -4   6   72.58    2.97
  -5  -4  -6  180.07    7.33
  -4   5  -6  200.43    7.15
  -4   5  -6  194.37    7.17
  -5  -4   6  181.30    6.67
   4  -5   6  182.39    6.72
  -4   5   6  185.24    6.74
  -5  -4   6  168.75    6.93
  -5  -3  -6   70.73    3.32
  -5  -3  -6   75.27    2.86
  -3   5  -6   80.74    3.11
  -3   5  -6   79.61    3.16
  -5  -3   6   95.61    3.70
   3  -5   6   91.01    3.66
  -5  -3   6   91.63    3.92
  -3   5   6   92.63    3.66
  -2   5  -6  240.54    8.98
  -5  -2  -6  239.18    8.75
  -5  -2  -6  255.42    9.15
  -2   5  -6  245.63    8.90
  -5  -2   6  235.50    8.55
  -2   5   6  239.37    8.47
   2  -5   6  229.12    8.48
  -5  -2   6  228.51    8.69
  -5  -1  -6    9.92    1.04
  -1   5  -6    7.90    0.82
  -5  -1  -6    9.26    0.72
   1  -5  -6    9.76    0.62
  -1   5   6    7.43    0.62
  -5  -1   6    5.38    0.81
   1  -5   6    6.64    0.80
  -5  -1   6    4.98    0.76
   1  -5   6    6.56    0.67
   0  -5  -6  402.07   13.93
  -5   0  -6  370.24   14.16
   0   5  -6  389.53   14.17
  -5   0  -6  404.38   13.96
   0  -5   6  403.21   14.37
  -5   0   6  384.05   14.48
   0   5   6  404.30   14.27
   0  -5   6  415.30   14.57
  -5   0   6  408.76   14.49
  -5   1  -6    6.91    0.72
  -1  -5  -6    6.61    0.69
  -5   1  -6    6.40    0.85
  -5   1   6    9.64    0.94
  -5   1   6    9.33    0.83
  -1  -5   6    9.31    0.74
  -1  -5   6    9.44    1.00
   1   5   6   10.03    0.60
  -5   2  -6  238.19    8.69
  -5   2  -6  235.49    8.83
  -2  -5  -6  241.62    8.76
  -2  -5   6  255.57    9.24
  -5   2   6  245.62    8.92
  -5   2   6  248.69    9.10
  -2  -5   6  240.40    8.92
  -5   3  -6   86.29    3.64
  -5   3  -6   84.66    3.55
  -3  -5  -6   97.31    3.74
  -3  -5   6   82.53    3.21
  -3  -5   6   77.97    3.53
  -5   3   6   83.72    3.10
  -5   3   6   82.31    3.41
  -5   4  -6  180.99    6.73
  -4  -5  -6  185.92    6.92
  -5   4  -6  171.93    6.74
  -5   4   6  201.41    7.35
  -4  -5   6  196.87    7.17
  -4  -5   6  188.56    7.52
  -5  -5  -6   41.74    2.34
  -5   5  -6   41.00    2.08
  -5   5  -6   42.32    2.06
  -5  -5   6   42.48    1.95
  -5   5   6   41.35    2.10
  -5  -5   6   39.63    2.38
  -5   6  -6  115.91    4.61
  -6  -5  -6  123.96    4.98
  -5   6  -6  109.81    4.61
  -6  -5   6  117.89    4.98
  -5   6   6  115.04    4.64
  -6  -5   6  116.16    4.56
  -4   6  -6   58.13    2.56
  -6  -4  -6   55.81    2.22
  -4   6  -6   55.87    2.54
  -6  -4  -6   61.40    2.92
  -6  -4   6   50.16    2.27
  -6  -4   6   45.34    2.54
   4  -6   6   50.86    2.30
  -4   6   6   47.09    2.27
  -3   6  -6  140.35    5.20
  -6  -3  -6  131.60    5.45
  -6  -3  -6  135.07    4.99
  -3   6  -6  136.38    5.23
  -3   6   6  139.34    5.31
  -6  -3   6  147.82    5.41
   3  -6   6  143.61    5.35
  -6  -3   6  129.06    5.58
  -2   6  -6   16.31    1.17
  -6  -2  -6   14.93    0.99
  -6  -2  -6   16.90    1.50
  -2   6  -6   16.84    1.12
  -6  -2   6   15.89    1.28
  -2   6   6   15.49    1.07
   2  -6   6   17.13    1.20
  -6  -2   6   16.47    1.39
   2  -6   6   16.14    1.26
  -1   6  -6  125.00    4.74
   1  -6  -6  129.06    4.61
  -6  -1  -6  117.01    4.70
  -6  -1  -6  126.34    5.05
  -1   6  -6  130.37    4.93
  -6  -1   6  134.13    5.11
  -1   6   6  131.34    4.82
   1  -6   6  128.12    5.04
   1  -6   6  126.12    4.89
  -6  -1   6  126.26    5.02
   0  -6  -6   67.70    2.70
   0   6  -6   71.26    2.98
  -6   0  -6   64.65    2.75
  -6   0  -6   66.36    3.04
   0   6   6   68.88    2.62
  -6   0   6   66.05    2.96
  -6   0   6   65.98    2.90
   0  -6   6   67.76    2.75
   0  -6   6   68.11    2.96
  -6   1  -6  124.53    4.93
  -1  -6  -6  129.35    4.93
  -6   1  -6  135.36    5.17
   1   6   6  130.54    4.66
  -6   1   6  124.90    5.03
  -1  -6   6  125.78    5.09
  -1  -6   6  130.07    4.83
  -6   1   6  129.96    4.93
  -2  -6  -6   16.47    1.25
  -6   2  -6   15.68    1.20
  -6   2  -6   15.28    1.33
  -6   2   6   17.65    1.14
  -2  -6   6   17.91    1.12
  -2  -6   6   16.87    1.47
  -6   2   6   17.68    1.44
  -6   3  -6  139.42    5.72
  -3  -6  -6  155.57    5.81
  -6   3  -6  150.39    5.68
  -6   3   6  149.07    5.45
  -3  -6   6  144.56    5.50
  -6   3   6  142.85    5.73
  -3  -6   6  154.09    5.92
  -6   4  -6   53.62    2.48
  -4  -6  -6   50.61    2.61
  -6   4  -6   51.26    2.46
  -4  -6   6   56.01    2.91
  -4  -6   6   58.41    2.45
  -6   4   6   56.42    2.25
  -6   4   6   58.70    2.69
  -6   5  -6  118.45    4.71
  -6   5  -6  118.40    4.74
  -5  -6  -6  116.84    4.96
  -5  -6   6  119.66    4.44
  -5  -6   6  104.80    4.85
  -6   5   6  118.44    4.67
  -6  -6  -6   38.20    2.44
  -6   6  -6   35.69    1.95
  -6   6  -6   35.68    2.07
  -6  -6   6   31.70    2.29
  -6   6   6   36.54    2.05
  -6  -6   6   34.22    1.80
  -7  -6  -6   39.46    2.70
  -6   7  -6   40.07    2.26
  -6   7  -6   40.35    2.12
  -6   7   6   48.97    2.53
  -7  -6   6   49.54    2.38
  -7  -6   6   47.83    2.95
  -5   7  -6   53.06    2.48
  -7  -5  -6   49.99    2.87
  -5   7  -6   56.11    2.59
  -5   7   6   42.14    2.09
  -7  -5   6   32.04    2.38
  -7  -5   6   37.13    2.01
  -4   7  -6   61.94    2.69
  -7  -4  -6   55.15    3.03
  -7  -4  -6   60.50    2.44
  -4   7  -6   64.33    2.76
  -4   7   6   60.44    2.66
   4  -7   6   56.68    2.67
  -7  -4   6   58.85    3.07
  -7  -4   6   58.35    2.73
  -7  -3  -6   31.92    1.61
  -3   7  -6   35.26    1.79
  -3   7  -6   33.92    1.79
  -7  -3  -6   37.99    2.26
   3  -7   6   35.36    1.90
  -7  -3   6   37.74    2.27
  -3   7   6   37.29    1.83
  -7  -3   6   38.62    2.02
  -7  -2  -6   22.51    1.78
  -2   7  -6   21.64    1.33
  -7  -2  -6   21.42    1.29
  -2   7  -6   21.34    1.42
   2  -7   6   32.25    1.71
  -7  -2   6   31.57    1.88
   2  -7   6   34.21    1.82
  -7  -2   6   27.54    1.93
  -2   7   6   33.30    1.61
  -7  -1  -6    0.71    0.80
   1  -7  -6    1.05    0.42
  -7  -1  -6    1.19    0.57
  -1   7  -6    1.09    0.52
  -1   7  -6    0.02    0.61
   1  -7   6    1.06    0.68
   1  -7   6    0.60    0.54
  -7  -1   6    1.18    0.74
  -7  -1   6   -0.15    0.72
  -1   7   6    0.55    0.43
   0  -7  -6  151.09    5.56
  -7   0  -6  151.53    5.91
  -7   0  -6  138.13    5.61
   0   7  -6  154.62    5.85
   0   7  -6  147.97    5.57
  -7   0   6  143.07    5.67
  -7   0   6  148.26    5.65
   0  -7   6  140.74    5.67
   0  -7   6  147.55    5.48
   0   7   6  145.52    5.33
  -7   1  -6    1.27    0.80
  -7   1  -6    0.26    0.62
  -1  -7  -6    0.58    0.56
  -7   1   6    1.26    0.63
   1   7   6    0.90    0.36
  -1  -7   6    1.20    0.73
  -7   1   6    0.43    0.75
  -1  -7   6    0.74    0.54
  -2  -7  -6   34.55    1.94
  -7   2  -6   36.21    1.96
  -7   2  -6   38.26    2.08
  -2  -7   6   22.62    1.31
  -7   2   6   21.44    1.34
  -2  -7   6   20.02    1.66
  -7   2   6   21.67    1.64
  -3  -7  -6   38.37    2.08
  -7   3  -6   35.55    1.99
  -7   3  -6   35.71    2.07
  -7   3   6   36.22    1.73
  -7   3   6   35.79    2.12
  -3  -7   6   36.16    2.25
  -3  -7   6   38.48    1.80
  -4  -7  -6   54.30    2.84
  -7   4  -6   58.86    2.75
  -7   4  -6   58.95    2.74
  -4  -7   6   68.23    3.25
  -4  -7   6   63.76    2.70
  -7   4   6   64.18    3.03
  -7   4   6   61.32    2.57
  -7   5  -6   41.49    2.22
  -7   5  -6   39.03    2.25
  -5  -7  -6   41.02    2.46
  -5  -7   6   54.04    2.43
  -7   5   6   53.90    2.75
  -5  -7   6   55.88    3.04
  -7   6  -6   45.19    2.56
  -6  -7  -6   50.31    2.88
  -7   6  -6   48.79    2.43
  -6  -7   6   40.82    2.01
  -7   6   6   40.02    2.32
  -6  -7   6   36.75    2.59
  -7   7  -6  127.48    5.25
  -7  -7  -6  125.58    5.59
  -7   7  -6  126.44    5.08
  -7  -7   6  123.78    5.45
  -7  -7   6  116.89    4.74
  -7   7   6  118.40    4.99
  -8  -7  -6    9.05    1.72
  -7   8  -6    6.82    1.21
  -8  -7   6   17.02    1.38
  -8  -7   6   14.08    1.98
  -7   8   6   14.62    1.53
  -8  -6  -6  114.21    5.31
  -6   8  -6  117.45    4.83
  -6   8  -6  115.87    4.69
  -8  -6   6  135.73    5.26
  -6   8   6  125.72    5.30
  -8  -6   6  132.35    5.82
  -8  -5  -6   11.76    1.69
  -5   8  -6    8.05    1.10
  -5   8  -6   10.27    1.08
  -8  -5   6    3.36    1.30
  -8  -5   6    6.63    1.03
  -5   8   6    4.55    0.90
  -8  -4  -6  103.51    4.62
  -4   8  -6   99.62    4.15
  -8  -4  -6   96.46    3.89
  -4   8  -6  103.57    4.11
  -8  -4   6   88.38    4.33
  -8  -4   6   97.20    4.04
  -4   8   6   95.04    3.90
   4  -8   6   98.97    3.99
  -3   8  -6   68.64    3.09
  -3   8  -6   71.64    3.11
  -8  -3  -6   73.59    2.98
  -8  -3  -6   74.16    3.58
  -3   8   6   68.62    2.87
   3  -8   6   65.52    2.95
  -8  -3   6   62.85    3.04
  -8  -3   6   67.93    3.33
  -2   8  -6   40.24    1.96
  -2   8  -6   37.93    2.01
  -8  -2  -6   35.63    2.33
  -8  -2  -6   37.38    1.90
  -8  -2   6   25.19    1.95
   2  -8   6   26.76    1.61
  -8  -2   6   24.07    1.84
  -2   8   6   29.04    1.51
   2  -8   6   27.28    1.71
  -8  -1  -6   40.11    2.41
  -1   8  -6   39.08    1.92
  -1   8  -6   38.57    2.10
  -8  -1  -6   38.23    1.97
   1  -8  -6   38.62    1.74
  -8  -1   6   33.32    2.12
  -8  -1   6   32.89    2.10
   1  -8   6   33.96    1.98
   1  -8   6   38.58    1.86
  -1   8   6   37.47    1.70
   0   8  -6    3.44    0.64
  -8   0  -6    6.72    1.15
   0  -8  -6    5.56    0.73
  -8   0  -6    4.27    0.82
   0   8  -6    4.94    0.92
  -8   0   6    4.94    0.94
   0  -8   6    5.12    0.76
   0  -8   6    4.61    0.94
  -8   0   6    4.35    0.99
   0   8   6    5.28    0.59
  -8   1  -6   39.26    2.28
  -1  -8  -6   38.20    1.96
  -8   1  -6   36.33    2.05
  -8   1   6   35.33    2.21
  -8   1   6   35.59    1.98
  -1  -8   6   38.20    2.16
   1   8   6   36.15    1.59
  -1  -8   6   38.32    1.86
  -2  -8  -6   26.22    1.75
  -8   2  -6   29.50    1.98
  -8   2  -6   27.63    1.79
  -8   2   6   37.98    2.27
   2   8   6   36.69    1.55
  -2  -8   6   37.18    2.27
  -8   2   6   38.87    1.98
  -2  -8   6   38.76    1.88
  -8   3  -6   66.82    3.17
  -8   3  -6   71.57    3.27
  -3  -8  -6   70.48    3.27
  -8   3   6   74.59    3.45
  -3  -8   6   73.28    3.55
  -8   3   6   71.57    3.08
  -3  -8   6   77.35    3.08
  -8   4  -6  107.73    4.41
  -8   4  -6  102.88    4.39
  -4  -8  -6  100.47    4.50
  -8   4   6  101.80    3.99
  -4  -8   6  100.30    4.05
  -8   4   6  103.69    4.44
  -4  -8   6  106.49    4.63
  -8   5  -6    6.26    1.13
  -5  -8  -6    6.33    1.33
  -8   5  -6    5.55    1.07
  -5  -8   6   10.35    1.58
  -5  -8   6    9.93    1.00
  -8   5   6    8.01    1.22
  -6  -8  -6  144.11    6.08
  -8   6  -6  140.45    5.64
  -8   6  -6  138.32    5.76
  -6  -8   6  114.71    4.45
  -6  -8   6  105.89    5.05
  -8   6   6  113.21    4.80
  -8   7  -6   15.48    1.64
  -7  -8  -6   16.94    2.04
  -8   7  -6   15.99    1.48
  -7  -8   6   11.78    1.85
  -7  -8   6   12.22    1.16
  -8   7   6    8.95    1.35
  -8  -8  -6  199.42    8.33
  -8   8  -6  195.21    7.81
  -8   8   6  189.26    7.34
  -8  -8   6  175.93    7.73
  -8   9  -6    6.12    1.38
  -9  -8  -6    6.89    1.96
  -9  -8   6    5.63    1.78
  -8   9   6    4.54    1.29
  -7   9  -6  118.53    5.09
  -9  -7  -6  115.98    5.66
  -7   9   6  117.64    5.14
  -9  -7   6  125.63    5.79
  -9  -7   6  122.14    5.35
  -9  -6  -6   11.07    1.88
  -6   9  -6    7.71    1.24
  -6   9   6    8.90    1.23
  -9  -6   6   11.85    1.29
  -9  -6   6   14.07    1.92
  -5   9  -6  106.96    4.43
  -5   9  -6  100.27    4.24
  -9  -5  -6  104.74    4.94
  -5   9   6   95.01    3.95
  -9  -5   6   88.63    4.00
  -9  -5   6   89.72    4.52
  -4   9  -6   23.16    1.61
  -4   9  -6   24.14    1.75
  -9  -4  -6   23.87    2.17
  -9  -4   6   17.82    1.91
  -9  -4   6   22.81    1.87
  -4   9   6   20.79    1.54
  -3   9  -6   82.87    3.42
  -9  -3  -6   74.89    3.25
  -3   9  -6   79.14    3.38
  -9  -3  -6   73.20    3.84
  -9  -3   6   79.95    3.91
  -9  -3   6   80.08    3.66
   3  -9   6   78.33    3.48
  -3   9   6   84.21    3.41
  -9  -2  -6   34.13    2.00
  -2   9  -6   38.31    2.08
  -9  -2  -6   41.21    2.65
  -2   9  -6   38.37    2.02
   2  -9   6   36.50    1.96
   2  -9   6   33.03    2.04
  -2   9   6   35.92    1.80
  -9  -2   6   29.20    2.10
  -9  -2   6   34.60    2.33
  -1   9  -6    2.78    0.71
  -1   9  -6    4.59    0.94
  -9  -1  -6    3.46    0.87
  -9  -1  -6    4.23    1.17
   1  -9  -6    4.02    0.67
  -9  -1   6    6.28    1.12
  -1   9   6    3.95    0.66
   1  -9   6    4.28    0.84
   1  -9   6    4.45    0.97
  -9  -1   6    4.24    1.11
   0  -9  -6   55.72    2.43
   0   9  -6   54.89    2.43
  -9   0  -6   51.10    2.93
   0   9  -6   55.66    2.73
  -9   0  -6   45.82    2.55
  -9   0   6   55.13    2.82
   0  -9   6   50.64    2.67
   0   9   6   50.23    2.19
   0  -9   6   50.14    2.40
  -9   0   6   53.21    2.72
  -9   1  -6    3.87    1.09
  -1  -9  -6    5.78    0.92
   1   9  -6    4.85    0.75
  -9   1  -6    5.34    0.98
  -1  -9   6    6.25    1.11
   1   9   6    4.07    0.57
  -9   1   6    3.52    0.95
  -1  -9   6    4.54    0.79
  -9   1   6    4.60    1.15
  -9   2  -6   35.44    2.15
  -9   2  -6   35.67    2.32
  -2  -9  -6   38.38    2.18
  -9   2   6   39.02    2.17
  -9   2   6   41.08    2.53
  -2  -9   6   41.15    2.44
  -2  -9   6   40.96    2.04
  -9   3  -6   92.40    4.03
  -3  -9  -6   91.43    4.00
  -9   3  -6   81.68    3.88
  -3  -9   6   79.44    3.82
  -9   3   6   80.28    3.78
  -3  -9   6   80.58    3.32
  -9   3   6   78.89    3.38
  -4  -9  -6   20.12    1.80
  -9   4  -6   21.53    1.86
  -9   4  -6   18.05    1.64
  -4  -9   6   22.40    1.50
  -4  -9   6   22.34    2.04
  -9   4   6   19.27    1.76
  -9   5  -6   99.35    4.44
  -9   5  -6   98.19    4.34
  -5  -9  -6  101.90    4.64
  -9   5   6  104.75    4.71
  -5  -9   6  114.39    5.01
  -5  -9   6  101.53    4.22
  -6  -9  -6   10.26    1.70
  -9   6  -6   10.23    1.33
  -9   6  -6    9.38    1.42
  -9   6   6   10.46    1.46
  -6  -9   6   10.45    1.12
  -6  -9   6   10.93    1.75
  -9   7  -6  124.51    5.53
  -7  -9  -6  133.16    5.97
  -9   7   6  115.83    5.08
  -7  -9   6  114.01    5.51
  -8  -9  -6    4.97    1.83
  -9   8  -6    5.80    1.43
  -8  -9   6    5.48    1.83
  -9   8   6    5.38    1.36
  -9   9  -6  185.81    7.62
  -9  -9  -6  184.45    8.20
  -9  -9   6  188.51    8.09
  -9   9   6  174.79    7.38
  -9  10  -6    4.00    1.51
 -10  -9  -6    7.11    2.22
 -10  -9   6    4.06    2.00
  -9  10   6    5.38    1.50
  -8  10  -6  136.56    5.95
 -10  -8  -6  140.49    6.70
 -10  -8   6  141.59    6.55
  -8  10   6  128.13    5.72
  -7  10  -6   -0.89    1.07
 -10  -7  -6    2.77    1.72
  -7  10   6    0.98    1.05
 -10  -7   6   -0.20    1.65
  -6  10  -6   55.12    3.00
 -10  -6  -6   57.24    3.78
  -6  10   6   46.72    2.73
 -10  -6   6   51.92    3.54
 -10  -6   6   50.12    2.72
 -10  -5  -6    3.91    1.57
  -5  10  -6    4.29    1.08
 -10  -5   6    3.27    1.48
 -10  -5   6    4.26    1.13
  -5  10   6    3.36    0.97
  -4  10  -6   61.89    3.12
 -10  -4  -6   69.47    3.85
 -10  -4   6   62.11    3.13
  -4  10   6   58.69    2.82
 -10  -4   6   56.77    3.39
 -10  -3  -6    7.46    1.59
 -10  -3  -6    7.17    1.10
  -3  10  -6    9.02    1.09
  -3  10  -6    7.58    1.07
  -3  10   6    4.86    0.86
   3 -10   6    3.43    0.97
 -10  -3   6    6.76    1.44
 -10  -3   6    6.78    1.25
  -2  10  -6    9.23    1.06
  -2  10  -6    8.34    1.13
 -10  -2  -6   11.46    1.73
 -10  -2  -6   10.52    1.19
   2 -10   6    8.69    1.19
  -2  10   6    7.23    0.91
   2 -10   6    6.96    1.04
 -10  -2   6    7.56    1.39
 -10  -2   6    9.16    1.36
  -1  10  -6   17.25    1.33
 -10  -1  -6   14.29    1.41
  -1  10  -6   19.09    1.60
 -10  -1  -6   14.25    1.76
   1 -10   6   17.68    1.61
   1 -10   6   14.23    1.25
  -1  10   6   14.77    1.22
 -10  -1   6   16.58    1.73
   0  10  -6    5.48    1.12
   0  10  -6    6.74    0.90
 -10   0  -6    7.96    1.41
   0 -10   6    6.23    1.16
 -10   0   6    6.21    1.32
 -10   0   6    6.28    1.19
   0 -10   6    5.53    0.92
   0  10   6    6.40    0.82
  -1 -10  -6   15.91    1.43
   1  10  -6   15.97    1.67
 -10   1  -6   18.29    1.59
   1  10  -6   17.60    1.39
 -10   1  -6   18.73    1.83
 -10   1   6   15.37    1.51
  -1 -10   6   15.00    1.54
 -10   1   6   15.02    1.69
  -1 -10   6   15.38    1.25
 -10   2  -6    7.46    1.38
   2  10  -6    7.95    0.92
 -10   2  -6    7.66    1.23
  -2 -10  -6    7.92    1.15
  -2 -10   6    9.28    1.39
  -2 -10   6   10.41    1.06
 -10   2   6   10.28    1.22
 -10   2   6   10.75    1.55
 -10   3  -6    5.43    1.27
 -10   3  -6    6.18    1.26
  -3 -10  -6    6.19    1.18
 -10   3   6    5.09    1.01
  -3 -10   6    6.77    0.94
  -3 -10   6    6.22    1.33
 -10   3   6    7.38    1.39
  -4 -10  -6   69.98    3.52
 -10   4  -6   63.72    3.42
 -10   4  -6   64.36    3.32
  -4 -10   6   60.01    2.74
  -4 -10   6   60.98    3.46
 -10   4   6   63.53    3.39
 -10   5  -6    4.55    1.32
 -10   5  -6    2.71    1.18
  -5 -10  -6    2.18    1.30
  -5 -10   6    1.51    1.31
 -10   5   6    2.79    1.25
  -6 -10  -6   55.76    3.51
 -10   6  -6   56.71    3.26
 -10   6   6   54.67    3.29
  -6 -10   6   58.67    3.65
 -10   7  -6    1.14    1.32
  -7 -10  -6    2.16    1.61
 -10   7   6   -0.25    1.21
  -7 -10   6    2.39    1.64
  -8 -10  -6  145.44    6.93
 -10   8  -6  144.92    6.32
 -10   8   6  137.86    5.99
  -8 -10   6  135.91    6.55
 -10   9  -6    3.11    1.53
  -9 -10  -6    6.33    2.17
  -9 -10   6    5.86    2.16
 -10   9   6    5.86    1.54
 -10 -10  -6  139.17    6.88
 -10  10  -6  122.70    5.90
 -10  10   6  117.29    5.57
 -10 -10   6  128.61    6.46
 -11 -10  -6   -1.96    2.09
 -10  11  -6    0.94    1.57
 -10  11   6   -0.16    1.44
 -11 -10   6    0.47    2.23
 -11  -9  -6   79.64    5.16
  -9  11  -6   81.16    4.37
  -9  11   6   75.95    4.21
 -11  -9   6   88.27    5.27
 -11  -8  -6    2.60    2.03
  -8  11  -6    0.60    1.28
  -8  11   6    0.85    1.21
 -11  -8   6    1.33    1.93
  -7  11  -6  104.60    4.74
 -11  -7  -6  100.57    5.67
  -7  11   6   99.84    4.61
 -11  -7   6  105.43    5.51
  -6  11  -6    3.65    1.22
 -11  -6  -6    4.51    1.85
 -11  -6   6    4.25    1.83
  -6  11   6    3.87    1.16
  -5  11  -6   57.98    3.14
 -11  -5  -6   66.56    4.13
 -11  -5   6   61.41    3.17
 -11  -5   6   53.77    3.68
  -5  11   6   60.41    2.98
  -4  11  -6    3.44    1.03
 -11  -4  -6    2.29    1.57
 -11  -4   6    3.10    1.51
 -11  -4   6    3.54    1.16
  -4  11   6    2.97    0.90
 -11  -3  -6   45.04    3.22
  -3  11  -6   44.47    2.47
 -11  -3   6   37.72    2.66
 -11  -3   6   44.54    3.02
  -3  11   6   42.00    2.23
  -2  11  -6    0.64    0.80
 -11  -2  -6    2.76    1.45
  -2  11  -6   -0.10    0.87
 -11  -2  -6    1.70    0.95
   2 -11   6    1.17    0.96
   2 -11   6    1.69    0.92
 -11  -2   6    1.56    1.27
  -2  11   6    0.79    0.71
 -11  -2   6    3.22    1.23
  -1  11  -6    4.68    1.12
 -11  -1  -6    6.39    1.18
  -1  11  -6    5.83    1.00
 -11  -1  -6    5.24    1.49
 -11  -1   6    2.89    1.27
   1 -11   6    3.21    0.95
 -11  -1   6    3.07    1.27
   1 -11   6    2.76    1.07
 -11   0  -6   10.37    1.35
 -11   0  -6    8.19    1.60
   0  11  -6   10.06    1.10
   0  11  -6    8.22    1.37
   0 -11   6    7.33    1.06
 -11   0   6    8.33    1.39
   0 -11   6    9.57    1.37
 -11   0   6    8.26    1.48
 -11   1  -6    3.97    1.35
   1  11  -6    3.33    0.83
   1  11  -6    4.16    1.25
 -11   1  -6    3.75    1.16
 -11   1   6    5.46    1.29
 -11   1   6    4.68    1.41
  -1 -11   6    4.51    0.93
  -1 -11   6    6.66    1.29
  -2 -11  -6    0.40    0.94
   2  11  -6    1.83    0.79
 -11   2  -6    3.78    1.28
 -11   2  -6    3.40    1.24
  -2 -11   6    1.20    0.79
 -11   2   6    2.02    1.34
  -2 -11   6    1.87    1.17
 -11   2   6    1.19    1.00
 -11   3  -6   45.59    2.89
   3  11  -6   42.70    2.25
 -11   3  -6   43.05    2.81
  -3 -11  -6   49.30    2.77
  -3 -11   6   48.82    3.03
  -3 -11   6   46.46    2.39
 -11   3   6   50.04    3.13
  -4 -11  -6    1.47    1.23
 -11   4  -6    1.18    1.20
 -11   4  -6    3.17    1.25
 -11   4   6    2.58    1.41
  -4 -11   6    2.51    1.39
 -11   5  -6   69.62    3.63
 -11   5  -6   71.82    3.85
  -5 -11  -6   72.44    3.94
 -11   5   6   57.72    3.47
  -5 -11   6   54.82    3.65
  -6 -11  -6    4.50    1.62
 -11   6  -6    5.12    1.56
 -11   6   6    2.16    1.47
  -6 -11   6    4.09    1.66
 -11   7  -6  111.32    5.19
  -7 -11  -6  106.33    5.60
 -11   7   6   98.25    4.95
  -7 -11   6  107.38    5.42
  -8 -11  -6    2.16    1.83
 -11   8  -6    0.16    1.52
  -8 -11   6    1.53    1.82
 -11   8   6   -0.86    1.45
  -9 -11  -6   89.73    5.58
 -11   9  -6   92.07    4.79
 -11   9   6   78.84    4.54
  -9 -11   6   89.12    5.23
 -10 -11  -6    1.11    2.11
 -11  10  -6    0.57    1.66
 -10 -11   6    0.92    2.21
 -11  10   6   -0.24    1.52
 -11  11  -6   75.98    4.50
 -11 -11  -6   73.12    5.38
 -11  11   6   64.07    4.06
 -11 -11   6   65.91    5.23
 -10  12  -6   79.72    4.53
 -12 -10  -6   79.24    5.72
 -10  12   6   66.20    4.21
 -12 -10   6   84.99    5.54
 -12  -9  -6   -1.47    2.17
  -9  12  -6   -0.32    1.47
 -12  -9   6    1.77    2.28
  -9  12   6   -0.82    1.33
  -8  12  -6  118.52    5.50
 -12  -8  -6  119.79    6.62
 -12  -8   6  124.09    6.41
  -8  12   6  111.96    5.32
  -7  12  -6    1.44    1.30
 -12  -7  -6    1.06    2.03
  -7  12   6    0.58    1.19
 -12  -7   6    0.05    1.92
 -12  -6  -6   71.36    4.74
  -6  12  -6   67.67    3.60
 -12  -6   6   58.24    4.14
  -6  12   6   53.53    3.11
  -5  12  -6   12.13    1.54
 -12  -5  -6   11.93    2.23
 -12  -5   6   13.87    2.30
  -5  12   6   10.24    1.39
 -12  -4  -6   88.03    4.98
  -4  12  -6   87.11    4.05
  -4  12   6   78.87    3.57
 -12  -4   6   71.70    3.84
 -12  -4   6   79.43    4.41
 -12  -3  -6    8.92    1.98
  -3  12  -6    6.97    1.19
 -12  -3   6    9.82    1.84
  -3  12   6   10.38    1.21
 -12  -3   6   11.53    1.68
 -12  -2  -6   17.94    2.27
  -2  12  -6   12.86    1.38
 -12  -2   6   16.20    1.86
 -12  -2   6   15.18    1.99
  -1  12  -6   17.64    1.53
 -12  -1  -6   23.98    1.94
 -12  -1  -6   22.83    2.40
 -12  -1   6   18.33    1.98
 -12  -1   6   17.05    1.99
   1 -12   6   18.14    1.57
   1 -12   6   17.43    1.83
   0  12  -6    2.68    0.89
 -12   0  -6    2.52    1.50
   0  12  -6    1.22    1.10
 -12   0  -6    1.15    1.17
   0 -12   6    1.02    0.90
 -12   0   6    1.74    1.29
   0 -12   6    3.01    1.22
 -12   0   6   -0.39    1.29
 -12   1  -6   18.87    2.11
   1  12  -6   22.35    2.03
   1  12  -6   17.13    1.44
 -12   1  -6   19.49    1.92
  -1 -12   6   19.64    1.97
 -12   1   6   22.93    2.21
  -1 -12   6   18.65    1.54
 -12   1   6   19.06    1.92
 -12   2  -6   14.18    1.78
 -12   2  -6   18.10    2.06
  -2 -12   6   12.66    1.75
  -2 -12   6   16.74    1.92
 -12   2   6   15.11    1.96
  -3 -12  -6   12.97    1.84
 -12   3  -6   10.30    1.73
 -12   3  -6   12.56    1.80
 -12   3   6    9.43    1.77
  -3 -12   6   10.80    1.75
 -12   4  -6   83.06    4.32
 -12   4  -6   89.78    4.28
  -4 -12  -6   84.85    4.33
 -12   4   6   85.99    4.54
  -4 -12   6   84.11    4.48
  -5 -12  -6   12.06    1.98
 -12   5  -6   12.83    1.94
  -5 -12   6   11.86    1.99
 -12   5   6    9.97    1.82
  -6 -12  -6   57.81    3.81
 -12   6  -6   60.61    3.82
 -12   6   6   67.42    3.89
  -6 -12   6   55.79    4.00
  -7 -12  -6    1.65    1.80
 -12   7  -6    5.38    1.76
 -12   7   6    2.19    1.64
  -7 -12   6    1.65    1.81
 -12   8  -6  120.20    5.96
  -8 -12  -6  132.86    6.51
  -8 -12   6  118.00    6.23
 -12   8   6  120.21    5.77
 -12   9  -6    3.24    1.86
  -9 -12  -6    1.46    2.13
  -9 -12   6    3.62    2.21
 -12   9   6    0.09    1.68
 -12  10  -6   81.17    4.69
 -10 -12  -6   72.39    5.39
 -10 -12   6   84.24    5.52
 -12  10   6   76.03    4.77
  -9  13  -6  120.80    5.62
 -13  -9  -6  106.12    6.85
 -13  -9   6  111.41    6.51
  -9  13   6  103.84    5.25
 -13  -8  -6    2.93    2.43
  -8  13  -6   -1.38    1.40
  -8  13   6    1.01    1.35
 -13  -8   6    4.57    2.36
  -7  13  -6  112.30    5.23
 -13  -7  -6  108.72    6.38
 -13  -7   6  103.62    5.84
  -7  13   6   98.79    4.79
 -13  -6  -6   17.28    2.85
  -6  13  -6   12.77    1.78
  -6  13   6   11.96    1.63
 -13  -6   6   13.09    2.58
  -5  13  -6   54.60    3.26
 -13  -5  -6   61.58    4.55
 -13  -5   6   65.34    4.37
  -5  13   6   59.80    3.28
  -4  13  -6   17.78    1.75
 -13  -4  -6   17.70    2.58
 -13  -4   6   13.45    2.35
  -3  13  -6   30.52    2.34
 -13  -3  -6   35.11    3.26
 -13  -3   6   22.52    2.26
 -13  -3   6   27.32    2.69
  -2  13  -6    7.63    1.29
 -13  -2  -6    9.72    2.15
 -13  -2   6   12.86    1.97
 -13  -2   6   11.10    1.75
 -13  -1  -6    3.65    1.79
  -1  13  -6    2.10    1.03
 -13  -1   6    5.90    1.57
 -13  -1   6    0.94    1.40
   0  13  -6   26.57    2.03
 -13   0  -6   26.71    2.28
 -13   0  -6   26.01    2.67
   0 -13   6   26.29    2.05
 -13   0   6   29.13    2.51
 -13   0   6   22.05    2.21
   1  13  -6    0.74    1.27
 -13   1  -6    3.08    1.47
 -13   1  -6    2.01    1.59
  -1 -13   6    0.64    1.26
 -13   1   6    1.99    1.46
 -13   1   6    1.15    1.53
 -13   2  -6    9.80    1.80
   2  13  -6   11.43    1.83
 -13   2  -6   11.57    1.90
  -2 -13   6    8.47    1.69
 -13   2   6   11.42    2.01
 -13   3  -6   27.45    2.57
 -13   3  -6   30.09    2.55
  -3 -13   6   32.03    2.76
 -13   3   6   36.01    2.99
 -13   4  -6   10.06    1.85
 -13   4   6   17.50    2.31
  -4 -13   6   17.33    2.28
  -5 -13  -6   69.30    4.05
 -13   5  -6   59.23    3.90
 -13   5   6   63.35    4.19
  -5 -13   6   57.32    3.98
 -13   6  -6   10.32    2.02
  -6 -13  -6   10.16    2.13
 -13   6   6   12.03    2.09
  -6 -13   6    7.13    2.11
  -7 -13  -6   96.87    5.59
 -13   7  -6   99.55    5.34
 -13   7   6  104.74    5.61
  -7 -13   6  105.60    5.77
 -13   8  -6    0.13    1.81
  -8 -13  -6    4.55    2.24
 -13   8   6   -1.95    1.69
  -8 -13   6   -0.65    2.06
  -9 -13  -6  114.10    6.50
 -13   9  -6  119.40    5.99
  -9 -13   6  105.75    6.20
 -13   9   6  114.09    5.84
  -8  14  -6   67.80    4.16
 -14  -8  -6   82.03    7.21
 -14  -8   6   83.60    5.86
  -8  14   6   75.06    4.30
 -14  -7  -6    4.15    2.59
  -7  14  -6    5.90    1.64
  -7  14   6    5.74    1.51
 -14  -7   6    4.58    2.46
  -6  14  -6   65.05    3.80
 -14  -6  -6   67.93    5.12
  -6  14   6   56.74    4.45
 -14  -6   6   64.35    4.70
  -5  14  -6   10.89    1.70
 -14  -5  -6   14.41    2.85
 -14  -5   6   12.25    2.51
 -14  -4  -6   50.08    4.40
  -4  14  -6   48.31    3.09
 -14  -4   6   46.98    3.96
 -14  -3  -6   11.71    2.51
  -3  14  -6    9.32    1.48
 -14  -3   6   17.49    2.49
 -14  -3   6   12.03    2.02
 -14  -2  -6   12.35    2.39
  -2  14  -6    7.07    1.37
 -14  -2   6    8.21    1.76
 -14  -2   6    8.50    1.96
 -14  -1  -6    7.82    2.17
 -14  -1   6    8.01    1.86
 -14  -1   6    8.23    1.82
 -14   0  -6   -0.25    1.73
 -14   0  -6   -1.49    1.67
 -14   0   6    3.46    1.55
 -14   0   6    2.93    1.61
 -14   1  -6    6.36    1.73
 -14   1  -6   12.38    2.13
 -14   2  -6    8.05    1.98
 -14   2  -6    4.48    1.67
 -14   2   6    5.63    1.91
 -14   3  -6   10.32    2.01
   3  14  -6   11.35    2.04
  -3 -14   6    9.12    1.93
 -14   3   6    9.06    2.09
 -14   4  -6   45.49    3.59
  -4 -14   6   42.01    3.43
 -14   4   6   47.93    3.86
 -14   5  -6   11.91    2.24
 -14   5   6   15.01    2.44
  -5 -14   6   12.50    2.34
 -14   6  -6   64.96    4.29
 -14   6   6   61.43    4.53
  -6 -14   6   66.50    4.49
 -14   7  -6    4.01    2.01
  -7 -14  -6    1.24    2.14
 -14   7   6    4.99    2.15
  -7 -14   6    5.13    2.24
  -8 -14  -6   73.31    5.12
 -14   8  -6   74.91    4.80
  -8 -14   6   65.41    4.98
 -14   8   6   75.15    6.31
 -15  -6  -6   15.51    3.50
  -6  15  -6   16.01    2.09
 -15  -6   6   16.43    2.92
  -5  15  -6   26.66    2.41
 -15  -5  -6   34.63    3.80
 -15  -5   6   37.51    3.73
 -15  -4  -6   27.27    3.57
  -4  15  -6   22.26    2.21
 -15  -4   6   26.00    3.08
 -15  -3  -6   16.12    2.81
 -15  -3   6   17.79    2.71
 -15  -2  -6   16.16    2.73
 -15  -2   6   19.33    2.44
 -15  -2   6   20.98    2.71
 -15  -1  -6    4.02    2.14
 -15  -1   6    6.21    1.95
 -15  -1   6    4.41    1.80
 -15   0  -6   46.04    4.09
 -15   0   6   33.84    3.05
 -15   1  -6    4.34    1.82
 -15   1  -6    3.61    2.02
 -15   1   6    6.01    2.06
 -15   2  -6   20.90    3.81
 -15   2  -6   19.28    2.44
 -15   2   6   17.19    2.60
 -15   3  -6   19.08    2.53
 -15   3   6   20.45    2.72
 -15   4  -6   34.67    3.15
 -15   4   6   22.03    2.85
 -15   5  -6   30.27    3.10
  -5 -15   6   31.09    3.25
 -15   5   6   29.53    3.37
 -15   6  -6   17.72    2.70
  -6 -15   6   13.66    2.59
 -15   6   6   16.76    2.98
 -16  -2  -6    2.50    2.41
 -16  -2   6    0.34    1.99
 -16  -1  -6   55.52    4.77
 -16  -1   6   50.64    3.94
 -16   0  -6    3.21    2.19
 -16   0   6    2.99    1.95
 -16   1  -6   53.02    4.75
 -16   1   6   51.32    4.16
 -16   2  -6    2.01    2.17
 -16   2   6    3.38    2.21
   0   0  -7   -0.09    0.35
   0   0   7    0.11    0.27
  -1   0  -7   23.76    1.26
   0   1  -7   25.54    1.30
   1   0  -7   27.59    1.26
   0  -1  -7   26.48    1.24
   0  -1   7   27.20    1.36
  -1   0   7   26.36    1.23
   1   0   7   27.02    1.16
   0   1   7   27.81    1.17
   0  -1   7   27.47    1.20
  -1   0   7   27.51    1.33
  -1  -1  -7   63.74    2.65
   1  -1  -7   65.66    2.58
  -1   1  -7   67.37    2.69
   1   1  -7   70.07    2.72
  -1  -1   7   69.98    2.74
  -1  -1   7   76.57    2.91
   1  -1   7   72.09    2.72
  -1   1   7   70.68    2.74
   1   1   7   70.78    2.66
  -1   2  -7   75.35    3.11
  -2  -1  -7   80.98    3.14
   1  -2  -7   78.50    2.95
  -1   2   7  106.12    4.02
  -2  -1   7  108.83    4.07
   1  -2   7  111.84    4.04
  -2  -1   7  106.42    4.18
   2   1   7  110.01    3.94
  -2   0  -7    3.18    0.59
   0  -2  -7    3.40    0.45
   0   2  -7    2.69    0.54
   2   0  -7    2.39    0.49
   0  -2   7    4.14    0.46
   0   2   7    2.80    0.37
   0  -2   7    3.54    0.60
  -2   0   7    2.37    0.47
   2   0   7    2.92    0.37
  -2   0   7    3.43    0.55
   1   2  -7  103.94    3.97
  -2   1  -7  101.81    3.93
  -1  -2  -7  101.73    3.86
   2  -1  -7   98.92    3.79
  -1  -2   7   80.79    3.28
   1   2   7   81.30    2.97
  -2   1   7   81.69    3.11
  -2   1   7   79.27    3.13
   2  -1   7   83.54    3.08
  -1  -2   7   81.78    3.10
  -2  -2  -7   27.18    1.38
  -2   2  -7   24.98    1.36
   2  -2  -7   25.38    1.13
   2  -2   7   27.15    1.26
  -2   2   7   24.01    1.29
  -2  -2   7   26.64    1.26
   2   2   7   27.40    1.06
  -2  -2   7   25.06    1.43
  -3  -2  -7   57.52    2.10
   2  -3  -7   57.01    2.12
  -3  -2  -7   56.57    2.47
  -2   3  -7   52.85    2.39
  -2   3   7   71.72    2.90
  -3  -2   7   73.63    3.10
  -3  -2   7   70.99    2.90
   3   2   7   74.95    2.70
   2  -3   7   76.63    2.91
  -3  -1  -7   46.77    2.23
   1  -3  -7   52.77    1.99
  -3  -1  -7   51.61    1.96
  -1   3  -7   50.89    2.22
  -3  -1   7   41.42    1.85
   1  -3   7   42.17    1.96
   3   1   7   43.42    1.67
   1  -3   7   42.35    1.79
  -1   3   7   42.15    1.76
  -3  -1   7   41.45    1.96
   0   3  -7   76.59    3.18
  -3   0  -7   76.45    2.95
  -3   0  -7   78.06    3.20
   0  -3  -7   83.07    3.01
  -3   0   7   82.88    3.23
   0   3   7   82.77    3.06
   0  -3   7   80.01    3.32
   0  -3   7   83.58    3.15
  -3   0   7   84.68    3.26
   3   0   7   79.88    3.09
  -3   1  -7   40.56    1.93
   1   3  -7   40.65    1.95
  -3   1  -7   42.17    1.75
  -1  -3  -7   43.32    1.83
  -3   1   7   54.57    2.13
   3  -1   7   50.90    2.09
  -3   1   7   50.42    2.18
   1   3   7   51.61    1.93
  -1  -3   7   47.43    2.28
  -1  -3   7   53.42    2.10
  -3   2  -7   68.88    2.92
   3  -2  -7   70.74    2.70
  -3   2  -7   68.55    2.77
  -2  -3  -7   74.89    2.91
  -2  -3   7   59.96    2.36
   2   3   7   59.52    2.12
  -3   2   7   61.70    2.28
   3  -2   7   54.81    2.34
  -2  -3   7   53.41    2.56
  -3   2   7   58.59    2.43
  -3  -3  -7  455.35   15.70
  -3   3  -7  437.63   15.66
   3  -3  -7  422.73   15.36
  -3   3  -7  430.94   15.54
   3  -3   7  459.96   15.89
  -3   3   7  444.08   15.91
  -3  -3   7  445.33   15.86
  -3  -3   7  434.09   16.08
  -4  -3  -7  115.27    4.57
  -3   4  -7  113.74    4.35
  -4  -3  -7  116.35    4.09
  -3   4  -7  109.74    4.43
   3  -4   7  127.28    4.75
  -3   4   7  124.36    4.76
  -4  -3   7  122.79    4.99
  -4  -3   7  124.68    4.73
  -4  -2  -7  173.29    6.12
  -2   4  -7  149.62    5.96
  -2   4  -7  158.79    5.87
  -4  -2  -7  154.91    5.70
   2  -4   7  142.66    5.25
  -4  -2   7  129.88    5.42
  -2   4   7  145.69    5.24
  -4  -2   7  143.17    5.29
  -4  -1  -7  185.30    6.71
   1  -4  -7  183.71    6.36
  -4  -1  -7  179.52    6.38
  -1   4  -7  158.88    6.58
  -4  -1   7  155.94    6.12
   4   1   7  151.84    5.83
   1  -4   7  164.86    5.96
  -1   4   7  166.83    5.91
   1  -4   7  172.49    6.14
  -4  -1   7  159.70    6.02
  -4   0  -7  206.51    7.24
   0   4  -7  192.89    7.46
  -4   0  -7  185.55    7.46
   0  -4  -7  215.59    7.27
   0  -4   7  209.58    7.38
   0  -4   7  189.43    7.54
   4   0   7  216.54    7.34
  -4   0   7  196.10    7.46
   0   4   7  201.94    7.27
  -4   0   7  203.81    7.47
  -1  -4  -7  175.16    6.11
  -4   1  -7  160.94    6.24
  -4   1  -7  158.27    6.03
  -4   1   7  172.43    6.55
  -1  -4   7  187.08    6.71
  -4   1   7  174.98    6.48
   4  -1   7  170.88    6.44
   1   4   7  174.79    6.28
  -1  -4   7  179.49    6.45
  -4   2  -7  137.35    5.15
  -4   2  -7  136.04    5.30
  -2  -4  -7  140.57    5.25
  -4   2   7  172.01    6.10
  -2  -4   7  168.59    6.42
  -2  -4   7  163.10    6.13
  -4   2   7  161.78    6.25
   4  -2   7  170.00    6.18
   4  -3  -7  119.16    4.40
  -4   3  -7  122.03    4.72
  -3  -4  -7  122.80    4.75
  -4   3  -7  119.58    4.59
  -3  -4   7  115.08    4.40
  -3  -4   7  123.42    4.75
   4  -3   7  107.28    4.43
  -4   3   7  118.26    4.53
  -4   3   7  118.40    4.25
  -4   4  -7   88.67    3.55
  -4  -4  -7   84.28    3.64
  -4   4  -7   86.16    3.46
  -4  -4   7   86.14    3.45
  -4   4   7   89.92    3.58
   4  -4   7   86.02    3.52
  -4  -4   7   89.73    3.82
  -5  -4  -7   72.24    3.30
  -4   5  -7   71.08    3.03
  -4   5  -7   75.09    3.11
  -5  -4   7   75.22    3.03
  -4   5   7   77.55    3.10
  -5  -4   7   65.27    3.29
   4  -5   7   73.48    3.07
  -5  -3  -7  125.02    4.55
  -3   5  -7  128.94    4.80
  -3   5  -7  128.15    4.89
  -5  -3  -7  119.81    5.02
   3  -5   7  116.78    4.49
  -5  -3   7  120.79    4.53
  -3   5   7  119.98    4.50
  -5  -3   7  107.28    4.72
  -2   5  -7   43.70    1.95
  -2   5  -7   43.58    2.09
  -5  -2  -7   42.27    2.26
  -5  -2  -7   45.23    1.81
   2  -5   7   42.82    1.97
  -5  -2   7   41.64    2.17
  -5  -2   7   44.04    2.08
  -2   5   7   44.90    1.95
  -5  -1  -7   81.68    3.20
  -5  -1  -7   80.54    3.52
   1  -5  -7   88.74    3.14
  -1   5  -7   82.94    3.44
  -5  -1   7   83.42    3.46
   1  -5   7   79.56    3.48
  -5  -1   7   89.43    3.55
   1  -5   7   86.50    3.35
  -1   5   7   86.30    3.28
   0   5  -7  131.87    5.35
   0  -5  -7  144.47    5.12
  -5   0  -7  135.71    5.40
  -5   0  -7  139.45    5.13
   0  -5   7  135.81    5.13
   0  -5   7  133.70    5.33
  -5   0   7  134.70    5.26
   0   5   7  137.96    5.02
  -5   0   7  144.05    5.28
  -5   1  -7   85.83    3.29
  -5   1  -7   75.54    3.45
  -1  -5  -7   87.41    3.31
  -1  -5   7   87.52    3.31
  -5   1   7   87.18    3.47
  -5   1   7   83.57    3.35
  -1  -5   7   77.73    3.51
   1   5   7   83.08    3.11
   5  -1   7   87.84    3.34
  -5   2  -7   42.94    1.99
  -2  -5  -7   47.68    2.11
  -5   2  -7   41.56    2.16
  -2  -5   7   42.81    2.26
  -2  -5   7   41.78    1.90
  -5   2   7   42.65    2.11
   5  -2   7   42.13    1.96
  -5   2   7   45.70    1.90
  -5   3  -7  114.66    4.59
  -3  -5  -7  118.68    4.61
  -5   3  -7  112.17    4.46
  -5   3   7  134.17    4.79
   5  -3   7  125.00    4.97
  -3  -5   7  130.34    4.91
  -3  -5   7  135.12    5.29
  -5   3   7  125.86    5.06
  -4  -5  -7   73.89    3.24
  -5   4  -7   70.96    3.08
  -5   4  -7   71.07    3.02
   5  -4   7   69.50    3.09
  -4  -5   7   75.51    3.02
  -5   4   7   73.76    3.19
  -4  -5   7   78.78    3.47
  -5   5  -7   90.06    3.69
  -5  -5  -7   88.57    3.88
  -5   5  -7   88.23    3.65
   5  -5   7   94.78    3.87
  -5  -5   7   96.61    4.21
  -5  -5   7   96.57    3.77
  -5   5   7   91.15    3.88
  -6  -5  -7  108.85    4.66
  -5   6  -7  109.89    4.36
  -5   6  -7  103.72    4.33
   5  -6   7  104.31    4.22
  -5   6   7  103.01    4.24
  -6  -5   7  107.22    4.15
  -6  -5   7   98.94    4.55
  -4   6  -7   84.90    3.52
  -6  -4  -7   83.98    3.81
  -4   6  -7   84.51    3.49
  -4   6   7  112.12    4.45
   4  -6   7  110.09    4.44
  -6  -4   7  116.50    4.46
  -6  -4   7  109.84    4.77
  -3   6  -7   52.00    2.26
  -6  -3  -7   52.36    2.63
  -6  -3  -7   45.93    2.00
  -3   6  -7   49.67    2.29
   3  -6   7   38.25    1.88
  -6  -3   7   34.23    2.17
  -6  -3   7   36.29    1.94
  -3   6   7   40.41    1.86
  -6  -2  -7   61.67    3.05
  -2   6  -7   67.89    2.90
  -2   6  -7   67.50    2.78
  -6  -2  -7   69.10    2.65
   2  -6   7   84.60    3.50
  -6  -2   7   87.90    3.76
  -2   6   7   88.96    3.46
  -6  -2   7   88.12    3.62
  -1   6  -7  107.08    4.11
  -1   6  -7  111.25    4.30
   1  -6  -7  110.47    3.95
  -6  -1  -7  101.99    4.39
  -6  -1  -7  100.31    4.04
   1  -6   7  126.90    4.83
   1  -6   7  123.35    4.97
  -1   6   7  127.49    4.73
  -6  -1   7  122.40    4.93
  -6  -1   7  131.03    5.04
   0   6  -7  122.29    4.71
  -6   0  -7  114.81    4.45
  -6   0  -7  108.41    4.71
   0  -6  -7  120.11    4.41
  -6   0   7  111.36    4.57
  -6   0   7  119.28    4.58
   0  -6   7  110.34    4.61
   0  -6   7  115.50    4.41
   0   6   7  118.70    4.29
  -6   1  -7  128.86    5.08
  -6   1  -7  121.26    4.82
  -1  -6  -7  128.95    4.84
  -1  -6   7  111.22    4.24
  -6   1   7  112.41    4.46
  -1  -6   7  114.71    4.53
  -6   1   7  104.39    4.30
   1   6   7  111.13    4.05
  -6   2  -7   81.48    3.60
  -6   2  -7   87.02    3.48
  -2  -6  -7   86.55    3.52
  -6   2   7   65.52    3.05
  -6   2   7   70.48    2.84
  -2  -6   7   72.64    3.22
  -2  -6   7   68.51    2.83
  -6   3  -7   39.74    2.00
  -6   3  -7   40.02    2.10
  -3  -6  -7   38.52    2.08
  -3  -6   7   54.36    2.72
  -6   3   7   47.42    2.46
  -3  -6   7   52.45    2.27
  -6   3   7   53.13    2.18
  -6   4  -7  106.77    4.43
  -4  -6  -7  111.90    4.57
  -6   4  -7  110.42    4.41
  -4  -6   7   84.01    3.94
  -4  -6   7   91.00    3.53
  -6   4   7   87.39    3.76
  -6   4   7   89.74    3.32
  -6   5  -7  107.43    4.37
  -6   5  -7  109.34    4.38
  -5  -6  -7  103.74    4.57
  -5  -6   7  104.82    4.62
  -5  -6   7  101.50    4.10
  -6   5   7  106.32    4.33
  -6  -6  -7   77.17    3.82
  -6   6  -7   85.83    3.58
  -6   6  -7   82.65    3.53
  -6   6   7   84.29    3.75
  -6  -6   7   85.90    4.13
  -6  -6   7   90.07    3.60
  -6   7  -7   23.01    1.66
  -6   7  -7   26.03    1.85
  -7  -6  -7   26.65    2.23
  -7  -6   7   28.63    1.78
  -6   7   7   29.48    1.94
  -7  -6   7   25.65    2.37
  -7  -5  -7  106.33    4.66
  -5   7  -7  100.59    4.22
  -5   7  -7  102.90    4.26
  -5   7   7   87.79    3.71
   5  -7   7   84.40    3.70
  -7  -5   7   88.14    3.66
  -7  -5   7   86.36    4.12
  -7  -4  -7   70.24    3.39
  -4   7  -7   69.50    2.99
  -4   7  -7   65.18    2.95
  -7  -4  -7   65.86    2.65
  -7  -4   7   93.06    3.84
   4  -7   7   90.87    3.77
  -7  -4   7   89.10    4.14
  -4   7   7   90.25    3.76
  -3   7  -7   76.41    3.03
  -3   7  -7   70.17    3.05
  -7  -3  -7   62.48    3.29
  -7  -3  -7   71.01    2.81
  -7  -3   7   77.63    3.74
   3  -7   7   82.52    3.44
  -7  -3   7   83.49    3.53
  -3   7   7   85.36    3.40
  -2   7  -7  120.32    4.90
  -7  -2  -7  126.65    4.70
  -2   7  -7  123.35    4.80
  -7  -2  -7  126.04    5.18
   2  -7   7  105.86    4.25
  -7  -2   7  110.63    4.39
  -7  -2   7  103.91    4.51
   2  -7   7  107.47    4.38
  -2   7   7  110.27    4.19
  -7  -1  -7   79.88    3.26
  -7  -1  -7   75.44    3.62
   1  -7  -7   83.60    3.12
  -1   7  -7   83.87    3.29
  -1   7  -7   82.25    3.49
  -1   7   7   83.88    3.21
  -7  -1   7   80.85    3.48
  -7  -1   7   72.80    3.50
   1  -7   7   83.54    3.32
   1  -7   7   83.25    3.49
   0   7  -7  292.66   11.03
  -7   0  -7  293.01   10.80
  -7   0  -7  301.02   11.12
   0  -7  -7  303.94   10.75
  -7   0   7  306.36   10.93
   0  -7   7  292.11   10.74
   0  -7   7  291.44   10.96
   0   7   7  299.78   10.61
  -7   0   7  290.64   10.93
  -1  -7  -7   89.27    3.53
  -7   1  -7   82.41    3.54
  -7   1  -7   87.53    3.79
  -7   1   7   83.98    3.52
  -1  -7   7   84.53    3.41
  -1  -7   7   83.10    3.70
   1   7   7   87.27    3.21
  -7   1   7   86.54    3.69
  -7   2  -7  103.76    4.32
  -7   2  -7  108.11    4.51
  -2  -7  -7  112.33    4.38
  -2  -7   7  126.08    5.25
  -2  -7   7  128.07    4.89
  -7   2   7  129.83    4.94
  -7   2   7  128.68    5.16
  -3  -7  -7   82.84    3.66
  -7   3  -7   90.78    3.73
  -7   3  -7   78.03    3.52
  -7   3   7   77.38    3.45
  -3  -7   7   77.10    3.16
  -3  -7   7   74.21    3.59
  -7   3   7   78.62    3.11
  -4  -7  -7   97.77    4.13
  -7   4  -7   94.64    4.01
  -7   4  -7   88.22    3.91
  -7   4   7   68.41    3.19
  -4  -7   7   72.03    2.94
  -4  -7   7   66.52    3.41
  -7   4   7   69.71    2.76
  -5  -7  -7   91.41    4.12
  -7   5  -7   88.98    3.88
  -7   5  -7   90.81    3.90
  -5  -7   7  103.84    4.06
  -5  -7   7   92.57    4.51
  -7   5   7  107.76    4.37
  -6  -7  -7   28.44    2.30
  -7   6  -7   27.71    1.90
  -7   6  -7   27.81    1.96
  -7   6   7   21.47    1.68
  -6  -7   7   23.59    2.15
  -6  -7   7   23.75    1.57
  -7   7  -7   25.47    1.78
  -7  -7  -7   20.49    2.07
  -7   7  -7   19.40    1.66
  -7  -7   7   23.36    1.64
  -7   7   7   19.13    1.69
  -7  -7   7   18.74    2.01
  -7   8  -7   18.95    1.69
  -7   8  -7   18.63    1.69
  -8  -7  -7   19.11    2.16
  -8  -7   7   25.29    2.39
  -7   8   7   24.27    1.92
  -8  -7   7   24.26    1.79
  -8  -6  -7   95.89    4.57
  -6   8  -7   89.88    3.90
  -6   8  -7   91.69    4.06
  -6   8   7   75.72    3.59
  -8  -6   7   80.34    4.15
  -8  -6   7   83.24    3.54
  -5   8  -7  106.30    4.54
  -8  -5  -7  115.14    5.06
  -5   8  -7  108.88    4.48
  -8  -5   7  117.04    4.56
  -5   8   7  111.08    4.53
  -8  -5   7  100.83    4.90
  -4   8  -7  123.21    4.84
  -8  -4  -7  123.73    5.30
  -4   8  -7  121.80    4.83
  -8  -4  -7  112.72    4.74
  -8  -4   7  104.02    4.23
   4  -8   7   96.93    4.13
  -8  -4   7   96.18    4.53
  -4   8   7  100.10    4.09
  -3   8  -7   69.67    3.06
  -8  -3  -7   66.36    2.83
  -8  -3  -7   65.06    3.43
  -3   8  -7   72.87    3.03
  -8  -3   7   78.74    3.71
  -8  -3   7   78.55    3.45
  -3   8   7   76.78    3.23
   3  -8   7   72.05    3.28
  -8  -2  -7  176.03    6.54
  -8  -2  -7  179.02    7.03
  -2   8  -7  174.70    6.62
  -2   8  -7  170.95    6.72
  -2   8   7  159.73    6.15
   2  -8   7  168.69    6.28
  -8  -2   7  166.96    6.57
  -8  -2   7  160.75    6.39
   2  -8   7  164.30    6.39
   1  -8  -7  126.66    4.61
  -8  -1  -7  121.92    4.79
  -1   8  -7  125.19    5.00
  -1   8  -7  122.22    4.78
  -8  -1  -7  118.05    5.18
   1  -8   7  132.02    5.06
   1  -8   7  129.37    5.23
  -8  -1   7  129.09    5.29
  -1   8   7  131.89    4.93
  -8  -1   7  127.91    5.24
  -8   0  -7  139.88    6.17
  -8   0  -7  149.16    5.89
   0  -8  -7  164.90    5.83
   0   8  -7  157.21    5.85
   0   8  -7  159.62    6.15
  -8   0   7  157.15    6.12
   0  -8   7  156.01    6.16
   0  -8   7  156.22    5.92
  -8   0   7  155.74    6.18
   0   8   7  155.57    5.77
  -8   1  -7  139.19    5.40
  -1  -8  -7  138.88    5.34
  -8   1  -7  142.20    5.66
   1   8  -7  130.66    5.60
  -8   1   7  123.88    5.10
  -8   1   7  124.17    4.94
   1   8   7  125.41    4.58
  -1  -8   7  117.81    5.08
  -1  -8   7  126.83    4.80
  -8   2  -7  170.87    6.42
  -8   2  -7  159.39    6.55
  -2  -8  -7  167.62    6.44
  -2  -8   7  175.77    7.05
  -2  -8   7  182.29    6.69
  -8   2   7  181.16    6.99
  -8   2   7  175.07    6.75
  -8   3  -7   80.28    3.58
  -3  -8  -7   79.86    3.65
  -8   3  -7   82.25    3.70
  -8   3   7   72.57    3.43
  -8   3   7   72.14    3.05
  -3  -8   7   70.82    3.52
  -3  -8   7   73.45    3.06
  -8   4  -7  116.04    4.76
  -8   4  -7  113.89    4.79
  -4  -8  -7  112.70    4.88
  -8   4   7  124.36    5.23
  -8   4   7  126.76    4.99
  -4  -8   7  123.78    4.88
  -4  -8   7  128.14    5.44
  -8   5  -7  117.83    4.90
  -5  -8  -7  121.53    5.18
  -8   5  -7  113.00    4.90
  -5  -8   7  109.16    4.37
  -5  -8   7  111.49    5.00
  -8   5   7  109.27    4.74
  -8   6  -7   84.45    3.97
  -6  -8  -7   91.27    4.34
  -8   6  -7   90.45    3.94
  -6  -8   7   94.84    3.91
  -8   6   7   88.96    4.19
  -6  -8   7  101.01    4.68
  -8   7  -7   22.57    1.86
  -8   7  -7   24.55    1.92
  -7  -8  -7   22.63    2.28
  -7  -8   7   15.49    2.05
  -7  -8   7   17.98    1.41
  -8   7   7   15.23    1.58
  -8   8  -7   44.36    2.74
  -8  -8  -7   44.02    3.23
  -8  -8   7   42.72    3.28
  -8   8   7   39.31    2.65
  -8  -8   7   45.81    3.06
  -9  -8  -7   30.36    2.95
  -8   9  -7   35.21    2.56
  -8   9   7   21.95    1.93
  -9  -8   7   24.79    2.63
  -7   9  -7   44.95    2.74
  -9  -7  -7   44.85    3.41
  -9  -7   7   43.30    2.48
  -9  -7   7   46.81    3.40
  -7   9   7   43.66    2.68
  -9  -6  -7   74.96    4.23
  -6   9  -7   82.58    3.72
  -9  -6   7   86.08    3.77
  -9  -6   7   80.43    4.37
  -6   9   7   83.50    3.78
  -5   9  -7  152.92    5.93
  -5   9  -7  150.31    6.02
  -9  -5  -7  147.88    6.50
  -9  -5   7  154.72    6.67
  -9  -5   7  156.82    6.21
  -5   9   7  154.20    6.11
  -4   9  -7  124.19    5.09
  -9  -4  -7  126.09    5.62
  -4   9  -7  127.16    5.07
   4  -9   7  111.65    4.77
  -9  -4   7  116.80    4.92
  -9  -4   7  124.85    5.32
  -4   9   7  115.73    4.73
  -3   9  -7   59.57    2.80
  -3   9  -7   60.86    2.85
  -9  -3  -7   63.19    3.40
  -9  -3  -7   56.96    2.66
  -3   9   7   77.53    3.28
  -9  -3   7   75.47    3.80
   3  -9   7   72.78    3.38
  -9  -3   7   79.82    3.56
  -9  -2  -7   76.32    3.34
  -9  -2  -7   85.65    3.99
  -2   9  -7   79.73    3.51
  -2   9  -7   78.09    3.40
  -9  -2   7   71.13    3.40
  -2   9   7   73.33    3.06
   2  -9   7   78.82    3.23
   2  -9   7   70.26    3.30
  -9  -2   7   67.85    3.51
  -9  -1  -7  197.14    7.91
  -1   9  -7  192.97    7.45
  -1   9  -7  198.45    7.67
  -9  -1  -7  206.03    7.51
  -1   9   7  203.88    7.39
   1  -9   7  192.37    7.67
  -9  -1   7  199.97    7.77
  -9  -1   7  205.89    7.83
   1  -9   7  197.08    7.51
   0   9  -7  185.29    7.07
  -9   0  -7  188.53    7.17
  -9   0  -7  186.85    7.52
   0   9  -7  186.69    7.38
   0  -9  -7  192.92    7.05
   0  -9   7  180.58    6.73
   0  -9   7  180.69    7.00
  -9   0   7  165.15    6.91
  -9   0   7  175.43    7.04
   0   9   7  187.38    6.58
  -1  -9  -7  212.20    7.98
   1   9  -7  216.89    8.31
  -9   1  -7  214.45    8.05
  -9   1  -7  209.34    8.29
   1   9  -7  208.46    7.88
  -9   1   7  195.09    7.65
  -1  -9   7  196.33    7.31
  -1  -9   7  204.02    7.66
  -9   1   7  184.98    7.44
  -2  -9  -7   80.10    3.56
  -9   2  -7   79.35    3.58
  -9   2  -7   78.02    3.77
  -2  -9   7   85.87    3.88
  -9   2   7   76.35    3.51
  -9   2   7   89.19    3.91
  -2  -9   7   80.79    3.42
  -3  -9  -7   83.71    3.78
  -9   3  -7   80.08    3.78
  -9   3  -7   81.39    3.73
  -3  -9   7   61.98    2.75
  -9   3   7   59.47    2.78
  -3  -9   7   63.31    3.29
  -9   3   7   60.72    3.20
  -9   4  -7  121.89    5.20
  -9   4  -7  119.72    5.16
  -4  -9  -7  128.88    5.32
  -4  -9   7  127.17    5.02
  -9   4   7  132.81    5.48
  -4  -9   7  126.10    5.61
  -9   5  -7  165.97    6.73
  -9   5  -7  172.09    6.72
  -5  -9  -7  163.59    6.91
  -5  -9   7  153.49    6.59
  -5  -9   7  156.51    5.92
  -9   5   7  152.06    6.32
  -9   6  -7   87.56    4.03
  -6  -9  -7   86.36    4.37
  -9   6  -7   89.75    4.16
  -6  -9   7   79.59    3.49
  -6  -9   7   85.95    4.36
  -9   6   7   81.70    3.98
  -7  -9  -7   53.23    3.55
  -9   7  -7   53.61    3.12
  -9   7   7   38.70    2.71
  -7  -9   7   40.24    3.06
  -9   8  -7   21.60    2.07
  -8  -9  -7   23.55    2.53
  -9   8   7   31.01    2.54
  -8  -9   7   31.95    2.91
  -9   9  -7    9.07    1.64
  -9   9   7    6.80    1.43
  -9  -9   7    6.37    1.98
 -10  -9  -7   12.36    2.45
  -9  10  -7   12.09    1.81
 -10  -9   7   10.93    2.31
  -9  10   7   10.85    1.68
  -8  10  -7   13.73    1.72
  -8  10   7   15.70    1.74
 -10  -8   7   15.42    2.38
 -10  -7  -7    5.74    1.81
  -7  10  -7    4.29    1.29
 -10  -7   7    1.56    1.65
  -7  10   7    1.25    1.02
 -10  -6  -7   27.15    2.74
  -6  10  -7   20.39    1.84
 -10  -6   7   24.59    2.55
 -10  -6   7   24.19    2.03
  -6  10   7   21.34    1.76
 -10  -5  -7   71.86    4.08
  -5  10  -7   62.84    3.25
  -5  10   7   52.75    2.74
 -10  -5   7   59.17    3.59
 -10  -5   7   50.91    2.97
 -10  -4  -7   83.87    4.31
  -4  10  -7   76.93    3.57
  -4  10  -7   79.63    3.61
  -4  10   7   81.23    3.58
 -10  -4   7   78.65    4.16
 -10  -4   7   84.05    3.85
 -10  -3  -7   79.85    4.07
  -3  10  -7   71.38    3.37
  -3  10  -7   75.66    3.40
 -10  -3   7   79.61    3.94
  -3  10   7   74.25    3.29
   3 -10   7   74.60    3.44
 -10  -3   7   76.21    3.67
  -2  10  -7   80.73    3.62
  -2  10  -7   78.66    3.48
 -10  -2  -7   77.49    3.51
 -10  -2  -7   84.53    4.18
   2 -10   7   86.51    3.82
 -10  -2   7   96.06    4.29
  -2  10   7   88.68    3.66
 -10  -2   7   82.25    4.07
   2 -10   7   89.31    3.93
  -1  10  -7  213.81    8.21
 -10  -1  -7  200.31    8.46
  -1  10  -7  224.36    8.01
 -10  -1  -7  209.39    8.04
   1 -10   7  206.92    8.03
   1 -10   7  208.44    7.84
 -10  -1   7  200.50    8.13
 -10  -1   7  209.80    8.15
  -1  10   7  210.13    7.69
   0  10  -7  105.90    4.22
   0  10  -7  100.19    4.52
 -10   0  -7   99.68    4.37
 -10   0  -7  109.76    4.81
 -10   0   7  101.62    4.57
   0 -10   7   98.06    4.38
 -10   0   7  100.95    4.42
   0 -10   7   98.96    4.11
   1  10  -7  212.43    8.16
 -10   1  -7  216.12    8.35
  -1 -10  -7  221.56    8.28
 -10   1  -7  220.02    8.65
   1  10  -7  223.67    8.61
  -1 -10   7  211.93    8.41
 -10   1   7  213.12    8.27
 -10   1   7  217.02    8.45
  -1 -10   7  218.89    8.06
   2  10  -7   91.46    3.80
  -2 -10  -7   95.25    4.08
 -10   2  -7   93.42    4.32
 -10   2  -7   90.59    4.09
  -2 -10   7   77.62    3.89
 -10   2   7   79.27    3.95
 -10   2   7   81.72    3.60
  -2 -10   7   82.87    3.46
  -3 -10  -7   80.11    3.82
 -10   3  -7   84.40    3.97
 -10   3  -7   80.55    3.80
 -10   3   7   72.48    3.77
  -3 -10   7   73.56    3.80
  -3 -10   7   76.02    3.23
  -4 -10  -7   94.42    4.35
 -10   4  -7   92.90    4.24
 -10   4  -7   85.19    4.16
  -4 -10   7   76.36    3.27
 -10   4   7   77.42    3.86
  -4 -10   7   72.79    3.92
 -10   5  -7   57.90    3.26
  -5 -10  -7   55.97    3.35
 -10   5  -7   60.27    3.21
  -5 -10   7   66.21    3.06
  -5 -10   7   63.23    3.75
 -10   5   7   66.78    3.58
 -10   6  -7   22.50    2.06
  -6 -10  -7   25.40    2.42
 -10   6  -7   23.58    2.24
  -6 -10   7   22.45    2.42
 -10   6   7   18.50    1.98
 -10   7  -7    2.04    1.37
  -7 -10  -7   -1.03    1.42
 -10   7   7    3.30    1.38
  -7 -10   7    2.90    1.64
  -8 -10  -7   16.91    2.39
 -10   8  -7   16.85    2.04
  -8 -10   7   15.99    2.34
 -10   8   7   12.04    1.78
 -10   9  -7    9.06    1.77
  -9 -10  -7    8.23    2.16
  -9 -10   7   11.04    2.28
 -10   9   7   12.35    1.81
 -10 -10  -7    4.38    2.10
 -10  10  -7    3.39    1.57
 -10  10   7    2.48    1.53
 -10 -10   7    3.70    2.15
 -10  11  -7    2.84    1.66
 -11 -10  -7    3.07    2.27
 -10  11   7    4.26    1.66
 -11 -10   7    2.23    2.24
 -11  -9  -7    3.93    2.22
  -9  11  -7    3.22    1.59
 -11  -9   7    3.71    2.19
  -9  11   7    3.68    1.46
  -8  11  -7    3.79    1.43
 -11  -8  -7    7.77    2.28
  -8  11   7    2.53    1.27
 -11  -8   7    7.44    2.22
 -11  -7  -7   29.32    3.04
  -7  11  -7   20.36    1.99
  -7  11   7   20.23    1.88
 -11  -7   7   16.86    2.50
 -11  -6  -7   19.79    2.61
  -6  11  -7   18.87    1.81
  -6  11   7   19.47    1.78
 -11  -6   7   18.16    2.42
 -11  -5  -7   57.58    3.84
  -5  11  -7   47.37    2.83
 -11  -5   7   42.56    3.41
 -11  -5   7   44.67    2.83
  -5  11   7   43.56    2.55
  -4  11  -7   83.25    3.89
 -11  -4  -7   88.71    4.74
 -11  -4   7   79.68    4.32
 -11  -4   7   76.26    3.85
  -4  11   7   78.08    3.54
  -3  11  -7   44.45    2.53
 -11  -3  -7   46.68    3.34
   3 -11   7   27.03    2.01
 -11  -3   7   29.38    2.25
  -3  11   7   29.31    1.87
 -11  -3   7   25.02    2.38
 -11  -2  -7   57.89    3.60
  -2  11  -7   58.57    2.87
 -11  -2  -7   54.49    2.92
  -2  11  -7   61.22    3.01
   2 -11   7   73.16    3.48
  -2  11   7   75.31    3.18
 -11  -2   7   67.84    3.77
 -11  -2   7   68.39    3.71
   2 -11   7   73.67    3.36
 -11  -1  -7   71.61    4.06
  -1  11  -7   78.44    3.65
 -11  -1  -7   76.96    3.59
  -1  11  -7   79.37    3.43
   1 -11   7   80.95    3.55
 -11  -1   7   87.47    4.03
   1 -11   7   77.94    3.71
 -11  -1   7   70.47    3.87
 -11   0  -7   70.63    3.51
   0  11  -7   79.48    3.73
   0  11  -7   78.19    3.35
 -11   0  -7   72.04    3.98
   0 -11   7   70.67    3.52
 -11   0   7   72.23    3.71
 -11   0   7   68.23    3.56
   0 -11   7   73.93    3.24
 -11   1  -7   81.81    3.84
 -11   1  -7   80.83    4.20
   1  11  -7   85.26    4.04
   1  11  -7   79.54    3.53
  -1 -11   7   78.41    3.79
 -11   1   7   74.68    3.68
  -1 -11   7   77.88    3.42
 -11   1   7   82.26    4.09
  -2 -11  -7   79.11    3.63
   2  11  -7   76.93    3.37
 -11   2  -7   74.45    3.91
 -11   2  -7   78.06    3.79
 -11   2   7   63.39    3.46
  -2 -11   7   60.17    3.29
 -11   2   7   55.63    3.00
  -2 -11   7   59.91    2.79
   3  11  -7   26.44    1.78
  -3 -11  -7   30.43    2.25
 -11   3  -7   30.79    2.47
 -11   3  -7   32.56    2.57
  -3 -11   7   41.47    2.25
 -11   3   7   42.09    2.96
  -3 -11   7   39.44    2.81
  -4 -11  -7   84.07    4.06
 -11   4  -7   81.44    4.10
 -11   4  -7   77.29    3.97
  -4 -11   7   82.55    4.32
 -11   4   7   82.72    4.25
 -11   5  -7   45.53    2.89
  -5 -11  -7   50.76    3.18
 -11   5  -7   48.02    3.15
 -11   5   7   50.41    3.30
  -5 -11   7   49.42    3.42
  -6 -11  -7   23.40    2.52
 -11   6  -7   26.21    2.29
  -6 -11   7   16.14    2.28
 -11   6   7   20.10    2.15
 -11   7  -7   17.99    2.08
  -7 -11  -7   17.57    2.44
  -7 -11   7   20.70    2.48
 -11   7   7   16.60    2.06
  -8 -11  -7    4.68    1.97
 -11   8  -7    6.64    1.72
 -11   8   7    4.11    1.65
  -8 -11   7    0.30    1.80
  -9 -11  -7    5.22    2.14
 -11   9  -7    2.11    1.63
 -11   9   7    1.24    1.58
  -9 -11   7    2.78    2.06
 -11  10  -7    2.64    1.72
 -10 -11  -7    0.61    2.25
 -10 -11   7    4.42    2.28
 -11  10   7    3.93    1.72
 -11 -11  -7    4.30    2.50
 -11  11  -7    2.45    1.75
 -11 -11   7    0.05    2.22
 -11  11   7    3.46    1.79
 -12 -10  -7    8.54    2.82
 -10  12  -7    3.34    1.76
 -12 -10   7    5.89    2.66
 -10  12   7    2.72    1.62
  -9  12  -7   16.85    2.14
 -12  -9  -7   14.00    2.89
 -12  -9   7   18.87    2.93
  -9  12   7   17.00    2.07
  -8  12  -7   20.74    2.22
 -12  -8  -7   32.83    3.48
  -8  12   7   18.27    2.01
 -12  -8   7   23.86    3.08
  -7  12  -7   18.66    2.01
 -12  -7  -7   16.24    2.76
  -7  12   7   20.51    2.00
 -12  -6  -7   14.80    2.46
  -6  12  -7    9.83    1.55
 -12  -6   7   12.35    2.41
  -6  12   7   13.83    1.61
 -12  -5  -7   68.59    4.50
  -5  12  -7   74.98    3.67
  -5  12   7   77.91    3.69
 -12  -5   7   75.17    4.47
 -12  -5   7   76.12    4.68
  -4  12  -7   66.25    3.40
 -12  -4  -7   68.85    4.43
 -12  -4   7   54.72    3.35
  -4  12   7   57.40    2.92
 -12  -4   7   55.82    3.83
  -3  12  -7   39.90    2.47
 -12  -3  -7   36.55    3.28
 -12  -3   7   47.87    3.03
 -12  -3   7   48.77    3.42
  -3  12   7   46.14    2.84
  -2  12  -7   50.34    2.73
 -12  -2  -7   49.95    3.59
 -12  -2   7   52.34    3.31
 -12  -2   7   55.78    3.43
   2 -12   7   54.30    2.90
 -12  -1  -7   67.41    3.93
 -12  -1  -7   63.86    3.30
  -1  12  -7   65.50    3.12
  -1  12  -7   60.71    3.28
 -12  -1   7   70.52    3.77
   1 -12   7   59.47    3.35
   1 -12   7   67.71    3.22
 -12  -1   7   65.95    3.75
 -12   0  -7   51.12    3.41
 -12   0  -7   46.95    2.89
   0  12  -7   50.00    2.97
   0  12  -7   50.94    2.60
   0 -12   7   48.68    2.90
 -12   0   7   44.47    3.23
   0 -12   7   50.79    2.61
 -12   0   7   48.16    3.05
 -12   1  -7   74.37    3.72
 -12   1  -7   73.41    4.11
   1  12  -7   72.66    3.29
   1  12  -7   69.28    3.73
 -12   1   7   68.26    3.71
  -1 -12   7   61.78    3.00
  -1 -12   7   60.15    3.42
 -12   1   7   60.64    3.33
 -12   2  -7   56.64    3.44
   2  12  -7   56.23    3.43
   2  12  -7   53.70    2.85
 -12   2  -7   61.48    3.34
 -12   2   7   45.92    3.25
  -2 -12   7   51.71    2.59
  -2 -12   7   48.67    3.17
 -12   3  -7   45.41    3.07
 -12   3  -7   51.40    3.29
  -3 -12   7   36.47    2.87
 -12   3   7   42.81    3.26
  -4 -12  -7   68.79    3.77
 -12   4  -7   63.31    3.75
 -12   4  -7   69.21    3.85
  -4 -12   7   63.08    3.91
 -12   4   7   63.34    3.85
 -12   5  -7   77.50    4.27
  -5 -12  -7   83.08    4.42
 -12   5   7   80.22    4.52
  -5 -12   7   79.19    4.45
  -6 -12  -7   11.86    2.14
 -12   6  -7   11.60    1.91
 -12   6   7   10.81    1.96
  -6 -12   7   11.98    2.20
  -7 -12  -7   22.55    2.68
 -12   7  -7   19.99    2.36
  -7 -12   7   14.70    2.51
 -12   7   7   17.09    2.23
  -8 -12  -7   18.32    2.65
 -12   8  -7   17.29    2.26
  -8 -12   7   21.08    2.85
 -12   8   7   19.65    2.35
  -9 -12  -7   18.35    2.92
 -12   9  -7   18.61    2.44
  -9 -12   7   20.05    2.95
 -12   9   7   14.37    2.27
 -10 -12  -7    6.53    2.52
 -12  10  -7    4.10    1.86
 -10 -12   7    7.93    2.58
 -12  10   7    1.74    1.81
 -13  -9  -7   21.63    3.47
  -9  13  -7   13.66    2.20
 -13  -9   7   15.39    3.16
  -9  13   7   16.79    2.16
 -13  -8  -7    6.52    2.74
  -8  13  -7    3.60    1.61
  -8  13   7   11.43    1.74
 -13  -7  -7   20.51    3.09
  -7  13  -7   20.53    2.15
  -7  13   7   18.08    1.99
 -13  -7   7   17.72    2.84
 -13  -6  -7   18.61    3.04
  -6  13  -7   19.44    2.02
  -6  13   7   18.43    1.89
 -13  -6   7   18.50    2.75
  -5  13  -7   44.82    2.99
 -13  -5  -7   58.66    4.35
  -5  13   7   46.62    2.86
 -13  -5   7   51.83    3.99
  -4  13  -7   45.26    2.89
 -13  -4  -7   48.25    4.11
 -13  -4   7   45.41    3.16
 -13  -4   7   53.12    3.84
  -3  13  -7   52.63    3.03
 -13  -3  -7   55.32    4.16
 -13  -3   7   50.60    3.52
 -13  -3   7   59.91    3.98
  -2  13  -7   73.85    3.55
 -13  -2  -7   69.15    4.51
 -13  -2   7   64.81    3.91
 -13  -2   7   61.97    3.77
 -13  -1  -7   79.32    4.60
  -1  13  -7   78.81    3.71
 -13  -1   7   87.77    4.52
   1 -13   7   88.93    3.98
 -13  -1   7   76.39    4.42
 -13   0  -7  171.80    7.48
 -13   0  -7  157.96    6.91
   0  13  -7  168.72    6.61
 -13   0   7  158.03    6.72
   0 -13   7  161.02    6.35
 -13   0   7  156.10    6.88
 -13   1  -7   81.65    4.30
 -13   1  -7   88.30    4.61
   1  13  -7   82.33    4.27
 -13   1   7   84.89    4.52
  -1 -13   7   74.93    4.06
   2  13  -7   69.56    3.94
 -13   2  -7   65.88    3.91
 -13   2  -7   69.06    3.98
  -2 -13   7   71.43    3.91
 -13   2   7   62.13    4.16
 -13   3  -7   55.78    3.50
 -13   3  -7   60.55    3.77
  -3 -13   7   55.55    3.59
 -13   3   7   50.71    3.67
 -13   4  -7   42.53    3.36
  -4 -13   7   45.30    3.44
 -13   4   7   46.44    3.78
 -13   5  -7   47.26    3.50
 -13   5   7   40.91    3.27
  -5 -13   7   48.88    3.78
 -13   6  -7   22.49    2.55
  -6 -13  -7   20.25    2.66
  -6 -13   7   16.07    2.44
 -13   6   7   16.96    2.35
 -13   7  -7   22.25    2.52
  -7 -13  -7   20.90    2.81
 -13   7   7   16.85    2.37
  -7 -13   7   16.56    2.67
 -13   8  -7   14.77    2.38
  -8 -13  -7   17.27    2.77
  -8 -13   7    6.98    2.42
 -13   8   7    8.80    2.16
 -13   9  -7   10.10    2.31
  -9 -13  -7   21.15    3.03
 -13   9   7   10.73    2.26
  -9 -13   7    9.12    2.62
  -8  14  -7   11.14    1.96
 -14  -8   7   17.16    4.55
  -8  14   7   16.39    2.13
  -7  14  -7    5.37    1.60
 -14  -7  -7    7.67    2.87
 -14  -7   7   10.45    2.63
  -7  14   7    6.07    1.58
 -14  -6  -7   23.67    3.28
  -6  14  -7   22.49    2.25
 -14  -6   7   26.87    3.25
  -5  14  -7   35.12    2.85
 -14  -5  -7   44.46    4.21
 -14  -5   7   33.88    3.37
 -14  -4  -7   49.62    4.30
  -4  14  -7   47.04    3.05
 -14  -4   7   49.75    4.01
  -3  14  -7   52.05    3.13
 -14  -3  -7   54.69    4.43
 -14  -3   7   41.08    3.61
 -14  -3   7   43.92    3.26
 -14  -2  -7   48.75    4.07
  -2  14  -7   48.77    2.93
 -14  -2   7   33.60    2.87
 -14  -2   7   41.31    3.39
 -14  -1  -7   75.10    4.67
  -1  14  -7   71.59    4.04
 -14  -1   7   59.61    3.98
 -14  -1   7   65.44    4.05
 -14   0  -7   74.64    4.76
 -14   0   7   64.47    4.18
 -14   0   7   64.52    4.96
 -14   1  -7   56.08    4.05
 -14   1  -7   58.55    3.70
 -14   1   7   65.34    4.18
 -14   2  -7   41.35    3.39
 -14   2  -7   41.75    3.18
 -14   2   7   43.90    3.65
  -2 -14   7   46.06    3.59
 -14   3  -7   43.21    3.31
   3  14  -7   47.47    3.49
 -14   3  -7   47.36    3.95
  -3 -14   7   49.39    3.57
 -14   3   7   44.01    3.71
 -14   4  -7   47.31    3.75
  -4 -14   7   49.20    3.57
 -14   4   7   41.56    3.43
 -14   5  -7   32.09    2.95
 -14   5   7   38.88    3.39
  -5 -14   7   36.97    3.39
 -14   6  -7   23.66    2.70
 -14   6   7   20.63    2.66
  -6 -14   7   19.58    2.72
 -14   7  -7    5.68    2.17
  -7 -14   7   10.33    2.54
 -14   7   7   10.25    2.39
  -8 -14  -7   18.41    2.99
 -14   8  -7   23.57    3.13
  -8 -14   7   14.26    2.78
  -5  15  -7   14.09    1.93
 -15  -5  -7   16.95    3.21
 -15  -5   7   16.71    2.84
  -4  15  -7   35.49    2.89
 -15  -4  -7   41.32    4.19
 -15  -4   7   30.80    3.25
  -3  15  -7   34.12    2.70
 -15  -3  -7   33.27    3.55
 -15  -3   7   31.84    3.24
 -15  -2  -7   23.85    3.05
 -15  -2   7   23.99    2.81
 -15  -2   7   19.64    2.38
 -15  -1  -7   21.77    3.03
 -15  -1   7   14.64    2.49
 -15  -1   7   16.44    2.38
 -15   0  -7   25.07    2.98
 -15   0   7   23.91    2.68
 -15   1  -7   13.86    2.51
 -15   1   7   15.18    2.39
 -15   2  -7   23.04    2.86
 -15   2  -7   18.44    2.45
 -15   2   7   24.85    2.81
 -15   3  -7   30.63    2.98
 -15   3   7   32.06    3.17
 -15   4  -7   31.40    3.03
   4  15  -7   27.52    4.37
 -15   4   7   36.59    3.46
  -4 -15   7   32.16    3.64
 -15   5  -7   19.03    2.61
  -5 -15   7   13.73    2.54
 -15   5   7   16.30    2.76
 -16  -2  -7    7.03    2.65
 -16  -2   7    6.17    2.35
 -16  -1  -7   29.95    3.39
 -16  -1   7   22.54    2.73
 -16   0  -7   37.14    3.74
 -16   0   7   34.95    3.27
 -16   1  -7   23.00    3.12
 -16   1   7   22.65    2.90
 -16   2   7   10.30    2.37
   0   0  -8  527.15   18.71
   0   0   8  598.21   21.07
  -1   0  -8    1.36    0.47
   1   0  -8    1.46    0.44
   0   1  -8    1.89    0.48
   0  -1  -8    1.68    0.44
   1   0   8    1.37    0.33
   0   1   8    2.09    0.35
   0  -1   8    1.84    0.38
  -1   0   8    1.55    0.38
  -1   0   8    1.98    0.48
  -1  -1  -8  957.84   32.42
   1  -1  -8  901.81   32.33
  -1   1  -8  880.70   32.43
   1   1  -8  936.26   32.45
  -1  -1   8  963.57   34.62
  -1   1   8  988.91   34.62
   1  -1   8  985.18   34.60
  -1  -1   8 1000.00   34.76
   1   1   8  989.30   34.55
  -2  -1  -8   39.65    1.91
   1  -2  -8   44.06    1.76
   2   1  -8   40.62    1.92
  -1   2  -8   43.64    1.95
   2   1   8   43.87    1.71
  -2  -1   8   41.12    1.99
  -1   2   8   45.41    1.81
  -2  -1   8   44.81    1.88
   1  -2   8   42.85    1.82
  -2   0  -8  757.08   27.74
   2   0  -8  782.31   27.70
   0   2  -8  766.98   27.76
   0  -2  -8  830.03   27.65
   2   0   8  806.34   29.18
   0  -2   8  837.61   29.24
  -2   0   8  841.24   29.28
   0  -2   8  802.86   29.39
   0   2   8  842.64   29.18
  -2   0   8  854.38   29.34
   2  -1  -8   43.14    1.81
  -1  -2  -8   42.98    1.88
   1   2  -8   43.07    1.98
  -2   1  -8   40.32    1.94
   2  -1   8   47.97    1.86
  -1  -2   8   45.55    2.09
  -1  -2   8   44.05    1.88
  -2   1   8   42.76    1.90
   1   2   8   46.79    1.75
  -2   1   8   43.45    1.89
   2  -2  -8  650.49   23.72
  -2   2  -8  676.29   23.92
  -2  -2  -8  694.63   23.91
   2   2   8  684.34   23.93
  -2  -2   8  686.95   24.09
   2  -2   8  700.21   24.08
  -2  -2   8  675.36   24.26
  -2   2   8  664.14   24.09
  -2   3  -8   18.70    1.19
  -3  -2  -8   17.52    1.25
   2  -3  -8   20.02    0.92
   3   2   8   24.58    1.02
   2  -3   8   24.24    1.24
  -3  -2   8   22.80    1.48
  -2   3   8   22.53    1.25
  -3  -2   8   21.46    1.26
  -3  -1  -8  292.28   10.14
   1  -3  -8  269.29    9.85
  -1   3  -8  268.50   10.07
   3   1   8  286.22    9.88
  -1   3   8  268.27    9.93
  -3  -1   8  281.01   10.03
  -3  -1   8  274.90   10.14
   1  -3   8  278.60    9.98
   0   3  -8    0.84    0.51
  -3   0  -8    2.45    0.63
   0  -3  -8    2.29    0.45
  -3   0   8    2.57    0.52
  -3   0   8    2.22    0.56
   3   0   8    2.09    0.39
   0   3   8    2.28    0.37
   0  -3   8    2.64    0.46
   0  -3   8    1.92    0.60
  -3   1  -8  279.61    9.93
   3  -1  -8  270.24    9.76
   1   3  -8  256.48    9.93
  -1  -3  -8  284.43    9.82
  -3   1  -8  264.85    9.70
  -1  -3   8  262.51   10.13
  -3   1   8  292.22    9.98
  -1  -3   8  281.79    9.94
   3  -1   8  274.49    9.91
   1   3   8  275.64    9.79
  -3   1   8  273.24    9.99
  -2  -3  -8   23.42    1.33
   3  -2  -8   23.26    1.11
  -3   2  -8   20.93    1.32
  -3   2  -8   21.46    1.16
  -3   2   8   21.40    1.06
  -2  -3   8   19.52    1.42
   3  -2   8   18.52    1.14
  -2  -3   8   20.59    1.15
   2   3   8   22.35    0.88
  -3   2   8   21.41    1.24
   3  -3  -8  224.97    8.09
  -3  -3  -8  238.37    8.02
  -3   3  -8  226.34    8.40
  -3  -3  -8  211.35    8.39
  -3   3  -8  233.31    8.26
  -3  -3   8  242.42    8.80
  -3  -3   8  226.98    9.00
   3   3   8  251.47    8.55
   3  -3   8  249.57    8.81
  -3   3   8  240.01    8.84
  -3   4  -8   12.32    0.99
  -3   4  -8   13.80    1.13
  -4  -3  -8   12.00    0.66
  -4  -3  -8   12.11    1.12
   3  -4   8   17.62    1.13
  -4  -3   8   15.57    1.15
  -4  -3   8   14.29    1.37
  -3   4   8   19.75    1.24
   2  -4  -8  230.65    8.07
  -4  -2  -8  237.92    8.10
  -4  -2  -8  201.67    8.43
  -2   4  -8  236.57    8.42
  -2   4   8  259.04    9.31
  -4  -2   8  265.97    9.56
   4   2   8  245.25    9.13
   2  -4   8  259.58    9.33
  -4  -2   8  257.51    9.37
  -4  -1  -8   49.42    2.00
   1  -4  -8   51.82    2.01
  -1   4  -8   51.99    2.31
  -4  -1  -8   47.61    2.34
   4   1   8   55.54    2.15
  -4  -1   8   58.22    2.49
  -4  -1   8   57.49    2.39
   1  -4   8   53.58    2.28
  -1   4   8   51.92    2.20
   1  -4   8   49.86    2.45
   0   4  -8  369.18   14.53
  -4   0  -8  420.13   14.59
  -4   0  -8  410.60   14.30
   0  -4  -8  410.81   14.33
  -4   0   8  394.41   13.91
   4   0   8  374.19   13.76
   0  -4   8  371.68   14.01
  -4   0   8  377.63   13.92
   0  -4   8  410.75   13.83
   0   4   8  394.83   13.72
  -4   1  -8   49.05    2.33
   1   4  -8   48.93    2.36
  -1  -4  -8   51.57    2.18
  -4   1  -8   52.37    2.12
   1   4   8   49.58    1.98
   4  -1   8   53.19    2.19
  -1  -4   8   55.19    2.49
  -4   1   8   49.34    2.30
  -4   1   8   54.44    2.24
  -1  -4   8   52.44    2.20
  -4   2  -8  230.24    8.87
  -2  -4  -8  249.37    9.00
  -4   2  -8  256.77    9.09
  -2  -4   8  230.88    8.84
   4  -2   8  244.29    8.61
  -4   2   8  234.85    8.68
  -2  -4   8  238.72    8.58
  -4   2   8  233.77    8.52
  -4   3  -8   16.11    1.25
  -4   3  -8   14.31    1.09
   4  -3  -8   15.27    0.85
  -3  -4  -8   18.43    1.32
   4  -3   8   14.01    1.07
  -4   3   8   11.92    1.06
  -4   3   8   13.47    0.81
  -3  -4   8   14.65    1.33
  -3  -4   8   14.04    1.03
  -4   4  -8  199.31    7.73
  -4  -4  -8  212.18    7.84
  -4   4  -8  208.23    7.63
  -4  -4   8  215.69    7.94
  -4  -4   8  220.17    8.28
  -4   4   8  215.26    8.02
   4  -4   8  213.73    7.97
  -4   5  -8   97.05    3.75
  -4   5  -8   92.67    3.82
  -5  -4  -8   88.19    3.96
  -5  -4   8   91.31    3.65
   4  -5   8   96.23    3.70
  -4   5   8   91.16    3.71
  -5  -4   8   81.37    3.91
  -3   5  -8  308.40   11.37
  -5  -3  -8  308.55   11.01
  -5  -3  -8  318.31   11.53
  -3   5  -8  309.27   11.26
   3  -5   8  302.45   11.24
  -5  -3   8  312.47   11.29
  -3   5   8  312.46   11.25
  -5  -3   8  314.10   11.53
  -2   5  -8   22.96    1.29
  -2   5  -8   22.90    1.44
  -5  -2  -8   20.77    1.62
  -5  -2  -8   23.30    1.12
  -5  -2   8   21.55    1.61
  -5  -2   8   22.41    1.43
   2  -5   8   24.26    1.38
  -2   5   8   23.71    1.32
  -5  -1  -8  330.38   11.80
   1  -5  -8  342.52   11.77
  -5  -1  -8  312.05   12.13
  -1   5  -8  338.18   12.10
  -1   5   8  355.75   12.56
   1  -5   8  361.44   12.82
   1  -5   8  358.17   12.62
  -5  -1   8  347.99   12.71
  -5  -1   8  332.96   12.78
   0   5  -8    0.64    0.60
  -5   0  -8    1.65    0.49
   0  -5  -8    1.32    0.45
  -5   0  -8    0.53    0.69
   5   0   8    1.38    0.47
   0   5   8    1.37    0.41
   0  -5   8    0.47    0.49
  -5   0   8    1.59    0.64
  -5   0   8    0.90    0.59
   0  -5   8    2.16    0.71
   1   5  -8  368.04   13.22
  -5   1  -8  359.64   13.17
  -5   1  -8  352.31   12.92
  -1  -5  -8  363.86   12.98
   5  -1   8  355.56   12.63
  -1  -5   8  365.94   12.91
   1   5   8  332.11   12.44
  -5   1   8  369.35   12.70
  -5   1   8  345.77   12.76
  -1  -5   8  346.14   12.62
  -5   2  -8   23.34    1.59
  -5   2  -8   22.90    1.38
  -2  -5  -8   24.26    1.45
  -5   2   8   24.49    1.50
  -2  -5   8   23.13    1.67
  -5   2   8   22.75    1.26
   5  -2   8   22.88    1.38
  -2  -5   8   23.63    1.31
  -5   3  -8  286.13   10.68
  -3  -5  -8  285.70   10.66
  -5   3  -8  298.50   10.56
  -5   3   8  317.89   11.11
  -3  -5   8  288.68   11.52
  -3  -5   8  309.96   11.23
  -5   3   8  320.33   11.39
   5  -3   8  318.47   11.30
   5  -4  -8   87.05    3.28
  -4  -5  -8   89.83    3.83
  -5   4  -8   93.46    3.65
  -5   4  -8   88.36    3.73
  -4  -5   8   94.85    3.77
  -4  -5   8   89.96    4.13
   5  -4   8   96.72    3.86
  -5   4   8   99.38    3.95
  -5   5  -8  119.86    4.73
  -5  -5  -8  116.47    4.91
  -5   5  -8  116.58    4.66
  -5   5   8  117.98    4.74
  -5  -5   8  118.51    4.62
   5  -5   8  117.15    4.69
  -5  -5   8  120.32    5.04
  -5   6  -8   59.85    2.75
  -5   6  -8   62.48    2.82
  -6  -5  -8   58.71    3.05
  -5   6   8   64.16    2.80
  -6  -5   8   60.80    2.68
   5  -6   8   55.53    2.69
  -6  -5   8   53.34    3.06
  -4   6  -8  135.02    5.00
  -4   6  -8  118.53    4.99
  -6  -4  -8  129.34    5.28
   4  -6   8  110.96    4.34
  -4   6   8  110.42    4.34
  -6  -4   8  111.11    4.33
  -6  -4   8   98.38    4.59
  -3   6  -8   51.83    2.42
  -6  -3  -8   52.95    2.70
  -3   6  -8   50.81    2.32
  -6  -3  -8   49.24    2.05
  -6  -3   8   51.83    2.79
  -6  -3   8   56.25    2.58
   3  -6   8   57.17    2.50
  -3   6   8   54.34    2.46
  -6  -2  -8   60.21    2.39
  -6  -2  -8   54.43    2.81
  -2   6  -8   60.70    2.69
  -2   6  -8   58.64    2.52
  -2   6   8   49.98    2.11
  -6  -2   8   43.65    2.41
  -6  -2   8   45.55    2.25
   2  -6   8   45.44    2.15
   1  -6  -8    0.45    0.36
  -1   6  -8    0.32    0.59
  -6  -1  -8    0.03    0.74
  -6  -1  -8   -0.13    0.47
  -1   6   8   -0.18    0.43
  -6  -1   8   -0.56    0.66
   1  -6   8   -0.06    0.54
   1  -6   8    0.42    0.64
  -6  -1   8    0.67    0.68
   0   6  -8  209.37    7.94
  -6   0  -8  208.81    7.99
  -6   0  -8  202.80    7.66
   0  -6  -8  216.02    7.64
   0  -6   8  218.57    7.95
  -6   0   8  213.91    8.11
   0   6   8  221.50    7.83
   0  -6   8  206.56    8.17
  -6   0   8  222.19    8.12
  -6   1  -8    0.56    0.74
  -6   1  -8    0.08    0.56
   1   6  -8    0.58    0.69
  -1  -6  -8    0.02    0.50
  -6   1   8    0.21    0.69
  -6   1   8    0.50    0.59
  -1  -6   8    0.34    0.52
  -1  -6   8   -0.11    0.71
   1   6   8   -0.14    0.33
  -2  -6  -8   46.26    2.21
  -6   2  -8   43.44    2.35
  -6   2  -8   46.75    2.17
  -2  -6   8   58.15    2.94
  -2  -6   8   64.02    2.62
  -6   2   8   63.31    2.62
  -6   2   8   62.45    2.86
  -3  -6  -8   55.60    2.62
  -6   3  -8   53.97    2.62
  -6   3  -8   52.99    2.47
  -6   3   8   54.20    2.16
  -3  -6   8   51.69    2.72
  -6   3   8   47.44    2.49
  -3  -6   8   48.97    2.27
  -6   4  -8  117.09    4.75
  -4  -6  -8  116.69    4.83
  -4  -6   8  121.88    5.41
  -6   4   8  130.09    5.24
  -6   4   8  133.47    4.81
  -4  -6   8  137.76    5.05
  -6   5  -8   60.24    2.76
  -5  -6  -8   59.12    2.99
  -6   5  -8   57.62    2.78
  -5  -6   8   64.81    2.77
  -5  -6   8   58.94    3.16
  -6   5   8   63.76    2.97
  -6  -6  -8   97.28    4.36
  -6   6  -8   91.50    4.00
  -6   6  -8   98.55    4.05
  -6  -6   8   84.92    4.22
  -6   6   8   89.82    3.93
  -6  -6   8   96.82    3.79
  -6   7  -8   88.85    3.96
  -6   7  -8   92.63    3.93
  -7  -6  -8   92.55    4.37
  -7  -6   8   92.16    3.83
  -6   7   8   95.83    3.96
  -7  -6   8   81.55    4.26
  -5   7  -8   29.86    1.82
  -7  -5  -8   30.46    2.30
  -5   7  -8   27.31    1.85
  -5   7   8   20.43    1.63
   5  -7   8   19.28    1.62
  -7  -5   8   19.77    1.88
  -7  -5   8   20.69    1.59
  -7  -4  -8   51.26    2.91
  -4   7  -8   59.35    2.59
  -7  -4  -8   52.36    2.20
  -4   7  -8   56.80    2.61
  -7  -4   8   51.14    2.49
  -7  -4   8   47.62    2.80
  -4   7   8   48.27    2.35
   4  -7   8   47.50    2.36
  -3   7  -8   66.58    2.92
  -3   7  -8   68.80    3.02
  -7  -3  -8   68.85    3.34
  -7  -3  -8   66.25    2.70
  -7  -3   8   58.94    2.72
  -7  -3   8   49.09    2.82
   3  -7   8   57.00    2.59
  -3   7   8   57.93    2.52
  -2   7  -8   14.06    1.16
  -7  -2  -8   13.55    1.06
  -2   7  -8   13.19    1.24
  -7  -2  -8   13.58    1.48
  -7  -2   8    9.28    1.14
   2  -7   8    8.28    0.92
  -7  -2   8    9.04    1.24
  -2   7   8    9.86    0.88
  -7  -1  -8   24.78    1.90
  -7  -1  -8   25.15    1.47
  -1   7  -8   24.87    1.63
   1  -7  -8   26.62    1.27
  -1   7  -8   25.88    1.47
   1  -7   8   31.01    1.70
  -7  -1   8   26.34    1.86
  -1   7   8   30.23    1.52
   1  -7   8   32.57    1.89
  -7  -1   8   30.39    1.86
  -7   0  -8    5.79    0.80
  -7   0  -8    5.08    1.04
   0  -7  -8    5.32    0.72
   0   7  -8    4.11    0.89
   0  -7   8    5.11    0.76
   0  -7   8    5.06    0.95
   0   7   8    6.28    0.63
  -7   0   8    5.76    0.97
  -7   0   8    4.89    0.93
   1   7  -8   30.60    1.99
  -1  -7  -8   31.91    1.73
  -7   1  -8   34.90    2.10
  -7   1  -8   32.18    1.79
  -7   1   8   25.30    1.60
  -1  -7   8   25.36    1.53
   1   7   8   28.26    1.25
  -1  -7   8   25.59    1.83
  -7   1   8   26.02    1.81
  -2  -7  -8    8.05    1.01
  -7   2  -8    8.17    0.97
  -7   2  -8    8.48    1.18
  -7   2   8   14.97    1.23
  -2  -7   8   15.04    1.12
  -7   2   8   16.15    1.43
  -2  -7   8   12.73    1.38
  -3  -7  -8   57.05    2.81
  -7   3  -8   60.50    2.71
  -7   3  -8   56.28    2.81
  -3  -7   8   70.01    3.38
  -7   3   8   68.40    2.83
  -7   3   8   66.68    3.19
  -3  -7   8   69.80    2.92
  -4  -7  -8   51.74    2.72
  -7   4  -8   50.67    2.58
  -7   4  -8   51.68    2.65
  -4  -7   8   60.72    2.68
  -7   4   8   62.27    2.98
  -4  -7   8   59.58    3.20
  -7   4   8   59.97    2.46
  -5  -7  -8   20.04    1.86
  -7   5  -8   21.38    1.73
  -7   5  -8   23.20    1.75
  -5  -7   8   31.03    1.75
  -5  -7   8   27.53    2.23
  -7   5   8   29.30    2.05
  -7   6  -8   95.78    4.20
  -6  -7  -8   99.44    4.53
  -7   6  -8   96.51    4.17
  -7   6   8   94.82    3.99
  -6  -7   8   88.52    3.69
  -6  -7   8   81.88    4.22
  -7  -7  -8   30.93    2.62
  -7   7  -8   32.24    2.08
  -7   7  -8   31.29    2.17
  -7  -7   8   34.66    2.00
  -7  -7   8   29.25    2.59
  -7   7   8   31.97    2.21
  -7   8  -8  177.80    6.85
  -7   8  -8  176.05    6.97
  -8  -7  -8  169.69    7.40
  -7   8   8  154.45    6.40
  -8  -7   8  160.91    6.24
  -8  -7   8  160.64    6.87
  -6   8  -8    6.20    1.04
  -6   8  -8    3.59    1.07
  -8  -6  -8    5.49    1.51
  -8  -6   8    7.31    1.59
  -6   8   8    6.36    1.12
  -8  -6   8    8.98    1.15
  -5   8  -8   86.73    3.83
  -8  -5  -8   85.30    4.23
  -5   8  -8   90.68    3.81
  -8  -5   8   82.30    3.67
  -8  -5   8   76.65    4.09
   5  -8   8   86.20    3.69
  -5   8   8   85.05    3.66
  -8  -4  -8   46.32    2.84
  -4   8  -8   44.55    2.33
  -4   8  -8   44.20    2.33
  -4   8   8   38.32    2.10
   4  -8   8   38.47    2.17
  -8  -4   8   39.74    2.29
  -8  -4   8   36.08    2.53
  -8  -3  -8  102.68    4.50
  -3   8  -8   95.13    4.01
  -8  -3  -8   93.65    3.81
  -3   8  -8  100.02    4.09
   3  -8   8  109.39    4.36
  -8  -3   8  106.93    4.48
  -3   8   8  112.04    4.29
  -8  -3   8   96.57    4.61
  -8  -2  -8   23.38    1.47
  -2   8  -8   25.45    1.56
  -2   8  -8   22.38    1.64
  -8  -2  -8   24.09    2.04
   2  -8   8   26.44    1.80
  -8  -2   8   27.91    1.91
  -2   8   8   29.87    1.59
  -8  -2   8   25.42    2.04
   2  -8   8   28.37    1.74
  -1   8  -8   15.01    1.24
   1  -8  -8   15.17    1.00
  -8  -1  -8   14.47    1.16
  -8  -1  -8   14.41    1.59
  -1   8  -8   13.60    1.31
  -1   8   8   11.87    0.92
   1  -8   8   11.56    1.08
  -8  -1   8   11.45    1.29
   1  -8   8   10.07    1.19
  -8  -1   8   10.35    1.30
  -8   0  -8   78.73    3.40
   0   8  -8   82.42    3.65
   0  -8  -8   82.44    3.30
   0   8  -8   79.18    3.34
  -8   0  -8   81.48    3.78
   0  -8   8   83.25    3.44
   0  -8   8   84.66    3.72
  -8   0   8   80.59    3.65
   0   8   8   83.33    3.26
  -8   0   8   83.79    3.73
  -8   1  -8    8.71    1.06
  -8   1  -8   13.11    1.45
   1   8  -8    9.96    1.29
  -1  -8  -8   10.96    1.06
  -8   1   8   16.39    1.34
  -1  -8   8   14.89    1.47
  -8   1   8   11.59    1.39
  -1  -8   8   12.38    1.11
   1   8   8   14.46    0.94
  -8   2  -8   29.81    1.92
  -2  -8  -8   31.78    1.95
  -8   2  -8   36.12    2.27
  -2  -8   8   22.86    1.90
  -8   2   8   20.03    1.54
  -2  -8   8   26.62    1.57
  -8   2   8   25.04    1.94
  -8   3  -8  119.24    4.97
  -8   3  -8  116.22    4.82
  -3  -8  -8  117.90    4.88
  -8   3   8  103.25    4.03
  -8   3   8  103.74    4.41
  -3  -8   8   95.86    4.51
  -3  -8   8   99.21    4.04
  -4  -8  -8   39.27    2.41
  -8   4  -8   42.57    2.46
  -8   4  -8   39.62    2.34
  -4  -8   8   45.02    2.85
  -8   4   8   45.90    2.61
  -4  -8   8   48.25    2.29
  -8   5  -8   86.21    3.87
  -8   5  -8   86.14    3.87
  -5  -8  -8   84.37    4.04
  -5  -8   8   98.43    3.93
  -5  -8   8   89.06    4.47
  -8   5   8   96.02    4.27
  -6  -8  -8   10.10    1.57
  -8   6  -8    7.20    1.23
  -8   6  -8    6.87    1.22
  -6  -8   8    4.50    1.39
  -8   6   8    5.73    1.26
  -6  -8   8    6.44    0.98
  -8   7  -8  168.67    6.80
  -7  -8  -8  167.43    7.14
  -8   7  -8  168.66    6.69
  -7  -8   8  171.36    7.31
  -7  -8   8  168.68    6.57
  -8   7   8  171.62    6.89
  -8  -8  -8    0.20    1.50
  -8   8  -8   -1.32    1.03
  -8  -8   8   -0.64    1.52
  -8   8   8    2.03    1.15
  -8  -8   8   -0.11    0.88
  -9  -8  -8  168.07    7.53
  -8   9  -8  169.50    6.95
  -9  -8   8  166.90    7.30
  -8   9   8  155.31    6.59
  -7   9  -8   11.82    1.48
  -9  -7  -8   11.39    1.98
  -7   9   8   10.62    1.43
  -9  -7   8   16.34    1.51
  -9  -7   8    9.96    1.93
  -6   9  -8  110.25    4.73
  -9  -6  -8  112.29    5.34
  -6   9  -8  105.36    5.05
  -9  -6   8   99.62    4.94
  -6   9   8  101.60    4.43
  -9  -6   8  104.39    4.46
  -9  -5  -8    8.62    1.61
  -5   9  -8    3.64    1.01
  -5   9  -8    4.28    0.98
  -9  -5   8    8.82    1.24
  -9  -5   8    6.90    1.59
  -5   9   8    6.48    1.05
  -4   9  -8  104.72    4.47
  -4   9  -8  107.22    4.48
  -9  -4  -8  112.03    5.08
   4  -9   8  106.91    4.39
  -9  -4   8  106.43    4.52
  -4   9   8  104.81    4.30
  -9  -4   8   96.12    4.73
  -3   9  -8   42.93    2.29
  -3   9  -8   41.70    2.24
  -9  -3  -8   40.36    2.77
  -9  -3  -8   42.59    2.10
  -3   9   8   40.94    2.14
   3  -9   8   40.65    2.27
  -9  -3   8   40.45    2.75
  -9  -3   8   44.87    2.52
  -2   9  -8   33.80    1.95
  -2   9  -8   35.70    2.08
  -9  -2  -8   32.16    2.50
  -9  -2  -8   33.58    1.89
   2  -9   8   36.66    2.23
  -9  -2   8   34.92    2.31
  -2   9   8   40.62    1.97
  -9  -2   8   35.70    2.48
   2  -9   8   38.05    2.11
  -9  -1  -8    9.00    1.07
  -9  -1  -8   11.30    1.58
  -1   9  -8   10.33    1.23
  -1   9  -8   10.93    1.09
  -9  -1   8   10.02    1.33
  -9  -1   8    9.47    1.35
   1  -9   8   11.32    1.12
   1  -9   8   10.01    1.27
  -1   9   8    9.36    0.91
   0  -9  -8    1.26    0.65
   0   9  -8   -0.71    0.81
   0   9  -8   -0.47    0.58
  -9   0  -8    0.41    0.77
  -9   0  -8   -0.46    1.05
  -9   0   8   -1.11    0.99
   0   9   8   -0.04    0.53
   0  -9   8    0.44    0.70
  -9   0   8    0.51    0.92
   0  -9   8    0.06    0.87
  -9   1  -8   10.42    1.18
  -9   1  -8    9.41    1.43
  -1  -9  -8   11.74    1.16
   1   9  -8   10.83    1.39
  -9   1   8    9.72    1.22
  -1  -9   8    9.56    1.04
  -9   1   8   11.24    1.44
  -1  -9   8    7.93    1.29
  -9   2  -8   36.45    2.24
  -9   2  -8   39.68    2.51
  -2  -9  -8   40.30    2.26
  -2  -9   8   32.83    2.36
  -2  -9   8   34.03    1.89
  -9   2   8   37.25    2.40
  -9   2   8   31.99    2.00
  -3  -9  -8   43.49    2.51
  -9   3  -8   42.57    2.50
  -9   3  -8   39.59    2.54
  -9   3   8   45.85    2.29
  -3  -9   8   43.97    2.80
  -9   3   8   46.43    2.71
  -3  -9   8   45.01    2.27
  -9   4  -8  108.44    4.73
  -4  -9  -8  117.33    4.92
  -9   4  -8  104.92    4.76
  -9   4   8  104.91    4.84
  -4  -9   8  111.92    5.06
  -4  -9   8  112.41    4.42
  -9   5  -8    8.55    1.35
  -9   5  -8    8.23    1.34
  -5  -9  -8    6.22    1.45
  -9   5   8    6.65    1.35
  -5  -9   8    6.19    0.99
  -5  -9   8    8.14    1.63
  -9   6  -8  120.33    5.13
  -9   6  -8  119.73    5.18
  -6  -9  -8  119.53    5.50
  -9   6   8  113.86    5.02
  -6  -9   8  110.95    4.57
  -6  -9   8  113.62    5.38
  -7  -9  -8   12.26    1.99
  -9   7  -8   14.39    2.21
  -9   7  -8   12.45    1.55
  -7  -9   8   12.18    1.94
  -9   7   8   12.20    1.67
  -8  -9  -8  161.09    7.35
  -9   8  -8  167.78    6.86
  -8  -9   8  162.75    7.26
  -9   8   8  160.15    6.73
  -9   9  -8    1.58    1.37
  -9  -9  -8    1.07    1.79
  -9   9   8    2.29    1.38
  -9  -9   8    3.94    1.87
 -10  -9  -8  128.38    6.56
  -9  10  -8  129.81    5.82
 -10  -9   8  148.24    6.82
  -9  10   8  121.81    5.85
  -8  10  -8    8.99    1.60
 -10  -8  -8    7.22    2.11
 -10  -8   8    7.70    2.10
  -8  10   8    6.15    1.40
  -7  10  -8  130.93    5.60
 -10  -7  -8  129.37    6.33
  -7  10   8  125.09    5.26
 -10  -7   8  119.08    5.92
 -10  -6  -8    4.66    1.79
  -6  10  -8    3.43    1.17
 -10  -6   8    5.29    1.22
  -6  10   8    4.17    1.08
 -10  -6   8    4.33    1.66
 -10  -5  -8   48.56    3.50
  -5  10  -8   49.43    2.74
  -5  10   8   47.43    2.68
 -10  -5   8   53.22    3.47
 -10  -5   8   53.20    2.95
  -4  10  -8    9.40    1.23
  -4  10  -8    6.42    1.13
 -10  -4  -8    9.55    1.76
 -10  -4   8   11.16    1.77
 -10  -4   8    8.48    1.37
  -4  10   8    9.23    1.12
   4 -10   8    6.64    1.15
  -3  10  -8   33.02    2.09
  -3  10  -8   34.33    2.14
 -10  -3  -8   37.56    2.76
   3 -10   8   33.67    2.13
 -10  -3   8   30.81    2.34
 -10  -3   8   25.85    2.50
  -3  10   8   31.39    1.88
 -10  -2  -8    6.34    1.06
 -10  -2  -8    5.06    1.47
  -2  10  -8    5.62    0.96
  -2  10  -8    7.39    1.15
 -10  -2   8    4.80    1.33
  -2  10   8    4.28    0.81
   2 -10   8    5.58    1.14
   2 -10   8    3.70    0.98
 -10  -2   8    4.67    1.19
  -1  10  -8    6.52    0.99
  -1  10  -8    6.59    1.17
 -10  -1  -8    7.41    1.13
  -1  10   8    5.58    0.79
   1 -10   8    3.66    1.06
   1 -10   8    2.65    0.88
 -10  -1   8    4.12    1.24
 -10  -1   8    4.08    1.23
   0  10  -8    0.04    0.69
 -10   0  -8    1.87    1.24
 -10   0  -8    0.74    0.88
   0  10  -8    1.30    1.01
 -10   0   8    1.14    1.04
   0 -10   8   -1.23    0.88
 -10   0   8    1.52    1.13
   0 -10   8   -0.28    0.77
  -1 -10  -8    3.67    0.95
   1  10  -8    4.62    1.21
 -10   1  -8    5.53    1.38
 -10   1  -8    4.54    1.08
   1  10  -8    4.22    0.84
  -1 -10   8    4.99    1.26
 -10   1   8    6.15    1.18
  -1 -10   8    6.67    1.00
 -10   1   8    7.37    1.41
  -2 -10  -8    7.34    1.20
 -10   2  -8    5.90    1.16
 -10   2  -8    6.92    1.45
  -2 -10   8    5.44    1.30
 -10   2   8    6.39    1.12
  -2 -10   8    5.68    0.96
 -10   2   8    9.96    1.52
  -3 -10  -8   32.43    2.27
 -10   3  -8   29.23    2.24
 -10   3  -8   32.31    2.50
  -3 -10   8   33.01    2.55
  -3 -10   8   36.17    2.03
 -10   3   8   36.05    2.64
 -10   4  -8    9.88    1.47
 -10   4  -8    9.38    1.50
  -4 -10  -8    8.94    1.53
  -4 -10   8    8.64    1.08
  -4 -10   8    8.29    1.61
 -10   4   8   10.15    1.61
  -5 -10  -8   62.06    3.45
 -10   5  -8   57.31    3.22
 -10   5  -8   57.08    3.35
 -10   5   8   48.15    3.06
  -5 -10   8   45.13    3.26
  -5 -10   8   49.17    2.45
  -6 -10  -8    3.89    1.56
 -10   6  -8    0.86    1.33
 -10   6  -8    5.93    1.39
 -10   6   8    4.85    1.44
  -6 -10   8    4.76    1.67
 -10   7  -8  145.14    6.17
  -7 -10  -8  137.07    6.47
 -10   7   8  122.19    5.72
  -7 -10   8  138.47    6.27
 -10   8  -8   10.52    1.83
  -8 -10  -8    5.14    1.98
 -10   8   8    7.72    1.64
  -8 -10   8    9.67    2.11
 -10   9  -8  139.04    6.20
  -9 -10  -8  136.09    6.76
  -9 -10   8  145.54    6.76
 -10   9   8  124.20    5.94
 -10 -10  -8   -0.93    1.97
 -10  10  -8   -0.43    1.49
 -10  10   8    0.67    1.51
 -10 -10   8   -0.97    1.96
 -10  11  -8   65.95    4.07
 -11 -10  -8   64.58    4.95
 -11 -10   8   70.83    5.03
 -10  11   8   62.76    3.99
 -11  -9  -8   -0.62    2.15
  -9  11  -8    1.39    1.48
  -9  11   8    0.82    1.39
 -11  -9   8    0.31    2.03
 -11  -8  -8   89.52    5.48
  -8  11  -8   87.27    4.41
 -11  -8   8   96.11    5.28
  -8  11   8   77.52    4.16
 -11  -7  -8    4.96    2.09
  -7  11  -8    3.29    1.33
  -7  11   8    5.50    1.32
 -11  -7   8    2.78    1.90
  -6  11  -8   50.88    3.04
 -11  -6  -8   52.47    4.02
 -11  -6   8   46.11    3.22
 -11  -6   8   52.12    3.79
  -6  11   8   48.78    2.85
  -5  11  -8    3.28    1.14
 -11  -5  -8    4.80    1.81
 -11  -5   8    6.29    1.77
 -11  -5   8    7.97    1.40
  -5  11   8    4.05    1.10
 -11  -4  -8  114.31    5.63
  -4  11  -8  112.90    4.86
 -11  -4   8  124.88    5.54
  -4  11   8  114.88    4.75
 -11  -4   8  101.64    5.04
  -3  11  -8    1.14    1.09
  -3  11  -8    3.45    1.00
 -11  -3  -8    0.57    1.41
 -11  -3   8    0.74    1.40
 -11  -3   8    4.58    1.30
   3 -11   8    3.86    1.09
  -3  11   8    2.34    0.87
 -11  -2  -8   14.36    2.02
  -2  11  -8   11.66    1.41
  -2  11  -8    9.94    1.24
  -2  11   8    5.05    0.94
   2 -11   8    7.13    1.14
 -11  -2   8    5.87    1.53
 -11  -2   8    4.53    1.29
  -1  11  -8    2.27    0.86
 -11  -1  -8    1.32    1.00
 -11  -1  -8    2.46    1.46
  -1  11  -8    0.30    0.95
   1 -11   8    0.83    0.99
 -11  -1   8    1.71    1.23
 -11  -1   8    1.00    1.17
   1 -11   8    1.89    0.93
 -11   0  -8    5.31    1.17
 -11   0  -8    3.85    1.48
   0  11  -8    2.89    1.12
   0  11  -8    3.45    0.88
   0 -11   8    3.30    0.95
   0 -11   8    2.96    1.14
 -11   0   8    2.30    1.19
 -11   0   8    4.09    1.39
   1  11  -8    2.03    0.82
 -11   1  -8    1.85    1.12
 -11   1  -8    2.80    1.33
   1  11  -8    1.77    1.12
  -1 -11   8    1.71    1.13
  -1 -11   8    1.07    0.86
 -11   1   8    1.21    1.09
 -11   1   8    2.16    1.34
 -11   2  -8    8.30    1.61
   2  11  -8    5.57    0.97
   2  11  -8    5.89    1.44
 -11   2  -8    6.09    1.31
  -2 -11   8    9.33    1.59
 -11   2   8   11.93    1.56
  -2 -11   8    9.38    1.18
 -11   2   8   11.85    1.74
   3  11  -8    2.92    0.85
 -11   3  -8    2.12    1.28
  -3 -11  -8    3.50    1.15
 -11   3  -8    3.25    1.27
  -3 -11   8    1.90    0.91
 -11   3   8    4.25    1.49
  -3 -11   8    2.59    1.31
 -11   4  -8  116.73    5.35
  -4 -11  -8  128.97    5.51
 -11   4  -8  122.51    5.43
  -4 -11   8  110.56    5.27
  -4 -11   8  108.28    4.65
 -11   4   8  113.83    5.21
  -5 -11  -8    8.77    1.76
 -11   5  -8    4.84    1.49
 -11   5  -8    6.55    1.50
 -11   5   8    4.73    1.60
  -5 -11   8    4.49    1.66
 -11   6  -8   52.72    3.40
  -6 -11  -8   55.67    3.61
 -11   6   8   49.03    3.34
  -6 -11   8   51.14    3.69
  -7 -11  -8    5.89    1.91
 -11   7  -8    4.48    1.58
 -11   7   8    3.18    1.55
  -7 -11   8    4.49    1.88
  -8 -11  -8   93.68    5.35
 -11   8  -8   89.49    4.72
 -11   8   8   87.99    4.51
  -8 -11   8   79.23    4.86
 -11   9  -8    6.01    1.82
  -9 -11  -8   -0.93    1.94
 -11   9   8    1.07    1.56
  -9 -11   8   -1.66    1.93
 -10 -11  -8   65.47    5.02
 -11  10  -8   70.37    4.21
 -10 -11   8   69.61    4.92
 -11  10   8   61.99    4.03
 -11  11  -8    0.34    1.75
 -11 -11  -8   -1.82    2.34
 -11 -11   8   -0.52    2.30
 -11  11   8   -2.97    1.53
 -10  12  -8    0.05    1.58
 -12 -10  -8    6.82    2.73
 -10  12   8   -0.46    1.56
 -12 -10   8    1.99    2.52
 -12  -9  -8   79.68    5.59
  -9  12  -8   81.75    4.48
 -12  -9   8   82.46    5.45
  -9  12   8   76.27    4.26
 -12  -8  -8    3.14    2.29
  -8  12  -8    0.95    1.43
 -12  -8   8    0.99    2.10
  -8  12   8   -2.10    1.22
 -12  -7  -8  105.55    6.01
  -7  12  -8  100.87    4.88
 -12  -7   8   97.81    5.47
  -7  12   8   87.67    4.40
 -12  -6  -8   10.13    2.30
  -6  12  -8    5.92    1.40
 -12  -6   8    8.93    2.20
  -6  12   8    8.16    1.38
  -5  12  -8   63.29    3.47
 -12  -5  -8   74.11    4.64
 -12  -5   8   69.07    4.28
  -5  12   8   62.95    3.28
 -12  -5   8   62.84    3.65
  -4  12  -8   14.87    1.63
 -12  -4  -8   20.54    2.62
 -12  -4   8   16.53    2.25
  -4  12   8   16.07    1.52
 -12  -4   8   17.86    1.92
 -12  -3  -8   62.89    4.06
  -3  12  -8   53.24    3.00
 -12  -3   8   46.42    3.38
 -12  -3   8   45.27    3.02
  -2  12  -8    6.27    1.15
 -12  -2  -8    6.14    1.80
 -12  -2   8    6.12    1.62
   2 -12   8    5.80    1.22
 -12  -2   8    5.31    1.50
  -1  12  -8   11.32    1.30
 -12  -1  -8   10.53    1.94
  -1  12  -8   10.33    1.51
 -12  -1  -8   11.38    1.49
 -12  -1   8    9.60    1.65
 -12  -1   8    8.64    1.68
   1 -12   8    9.18    1.48
   1 -12   8    7.89    1.25
   0  12  -8   24.10    2.16
 -12   0  -8   25.06    2.03
   0  12  -8   25.30    1.89
 -12   0  -8   24.32    2.43
   0 -12   8   24.02    2.23
 -12   0   8   26.55    2.45
   0 -12   8   23.61    1.83
 -12   0   8   31.38    2.53
 -12   1  -8    8.50    1.50
 -12   1  -8   10.50    1.83
   1  12  -8   10.51    1.22
   1  12  -8   11.63    1.70
  -1 -12   8    8.69    1.61
  -1 -12   8   10.30    1.30
 -12   1   8   14.68    1.97
 -12   1   8   12.23    1.64
 -12   2  -8   11.91    1.88
 -12   2  -8    8.75    1.58
   2  12  -8    7.16    1.12
   2  12  -8    6.17    1.57
  -2 -12   8    8.92    1.62
 -12   2   8    6.16    1.69
  -2 -12   8    6.04    1.13
 -12   3  -8   50.89    3.25
 -12   3  -8   51.10    3.38
 -12   3   8   53.41    3.59
  -3 -12   8   56.90    3.56
  -4 -12  -8   16.59    1.99
 -12   4  -8   18.97    2.08
 -12   4  -8   18.55    2.10
 -12   4   8   11.87    1.94
  -4 -12   8   18.60    2.23
 -12   5  -8   68.21    3.99
  -5 -12  -8   75.68    4.13
  -5 -12   8   64.68    4.17
 -12   5   8   71.67    4.12
  -6 -12  -8    8.43    1.96
 -12   6  -8    9.63    1.84
 -12   6   8    4.40    1.76
  -6 -12   8    4.97    1.93
 -12   7  -8   91.95    4.89
  -7 -12  -8   95.95    5.23
 -12   7   8   93.40    4.98
  -7 -12   8   98.64    5.39
  -8 -12  -8    0.01    1.91
 -12   8  -8    2.99    1.83
 -12   8   8   -0.85    1.60
  -8 -12   8    0.51    1.98
  -9 -12  -8   74.94    5.20
 -12   9  -8   83.60    4.70
 -12   9   8   78.59    4.59
  -9 -12   8   77.17    5.23
 -10 -12  -8   -1.04    2.34
 -12  10  -8    4.03    1.96
 -10 -12   8    0.34    2.19
 -12  10   8    2.86    1.86
 -13  -9  -8    8.68    2.83
  -9  13  -8    4.04    1.81
 -13  -9   8    2.05    2.54
  -9  13   8    2.20    1.66
  -8  13  -8  101.59    5.17
 -13  -8  -8  114.46    6.70
 -13  -8   8  103.75    6.10
  -8  13   8   95.57    4.83
  -7  13  -8    0.56    1.35
 -13  -7  -8    1.39    2.41
  -7  13   8    0.98    1.31
 -13  -7   8   -0.31    2.05
  -6  13  -8   46.03    3.17
 -13  -6  -8   58.63    4.57
  -6  13   8   46.77    3.00
 -13  -6   8   50.09    4.13
  -5  13  -8   13.73    1.68
 -13  -5  -8   10.12    2.43
 -13  -5   8    9.22    2.20
  -5  13   8   10.27    1.99
 -13  -4  -8   61.80    4.39
  -4  13  -8   51.34    3.16
 -13  -4   8   51.24    3.33
 -13  -4   8   51.43    3.85
  -3  13  -8   11.01    1.49
 -13  -3  -8   14.06    2.51
 -13  -3   8   15.37    1.95
 -13  -3   8   15.86    2.33
  -2  13  -8    6.00    1.26
 -13  -2  -8    7.33    2.13
 -13  -2   8    8.63    1.88
 -13  -2   8    9.63    1.76
  -1  13  -8   11.12    1.42
 -13  -1  -8   11.60    2.11
 -13  -1   8   11.10    1.89
   1 -13   8   11.48    1.49
 -13  -1   8   11.86    1.90
   0  13  -8    1.16    1.66
 -13   0  -8    3.88    1.36
   0  13  -8    2.28    1.01
   0 -13   8    5.18    1.53
 -13   0   8    4.91    1.62
   0 -13   8    0.82    1.08
 -13   0   8    1.51    1.44
 -13   1  -8   10.54    2.05
   1  13  -8   11.78    2.02
   1  13  -8   10.46    1.78
 -13   1  -8   13.48    1.85
  -1 -13   8   11.08    1.79
  -1 -13   8   11.23    1.47
   2  13  -8    4.50    1.63
 -13   2  -8    7.96    1.88
 -13   2  -8    6.80    1.66
  -2 -13   8    7.68    1.78
 -13   2   8    6.61    1.83
   3  13  -8   12.42    2.08
 -13   3  -8   12.43    1.93
 -13   3  -8   17.29    2.18
 -13   3   8   13.88    2.16
  -3 -13   8   16.44    2.18
 -13   4  -8   52.30    3.69
 -13   4  -8   58.39    3.77
 -13   4   8   54.63    3.84
  -4 -13   8   53.43    3.70
 -13   5  -8   12.30    2.07
 -13   5   8   12.01    2.23
  -5 -13   8   13.69    2.25
 -13   6  -8   47.56    3.76
  -6 -13  -8   45.54    3.77
 -13   6   8   47.79    3.96
  -6 -13   8   51.17    3.97
 -13   7  -8    2.77    1.87
  -7 -13  -8    0.94    1.99
 -13   7   8   -0.35    1.80
  -7 -13   8    0.88    1.97
 -13   8  -8  112.47    5.72
  -8 -13  -8  111.04    6.26
 -13   8   8  110.01    5.92
  -8 -13   8  112.83    6.21
 -13   9  -8    5.07    2.12
  -9 -13  -8    5.53    2.48
 -13   9   8    6.09    2.12
  -9 -13   8    3.34    2.40
 -14  -7  -8   44.90    4.38
  -7  14  -8   44.98    3.33
  -7  14   8   52.53    4.35
 -14  -7   8   50.08    4.65
  -6  14  -8   14.34    1.95
 -14  -6  -8   15.40    3.06
 -14  -6   8   15.57    2.77
  -5  14  -8   45.57    3.14
 -14  -5  -8   48.76    4.30
 -14  -5   8   54.04    4.29
  -4  14  -8   16.04    1.85
 -14  -4  -8   19.29    2.98
 -14  -4   8   15.91    2.56
  -3  14  -8   22.33    2.06
 -14  -3  -8   27.60    3.25
 -14  -3   8   22.71    2.59
 -14  -3   8   17.61    2.21
  -2  14  -8    5.22    1.35
 -14  -2  -8    7.26    2.32
 -14  -2   8    8.26    1.85
 -14  -2   8    4.30    1.85
 -14  -1  -8    5.61    2.15
  -1  14  -8    3.90    1.22
 -14  -1   8    7.79    1.86
 -14  -1   8    3.54    1.69
 -14   0  -8   19.17    2.57
 -14   0   8   14.41    2.14
 -14   1  -8    3.54    1.65
 -14   1  -8    8.84    2.09
 -14   1   8    3.03    1.73
 -14   2  -8   10.60    2.08
   2  14  -8    5.24    1.75
 -14   2  -8    2.57    1.69
 -14   2   8    6.74    1.97
  -2 -14   8    6.73    1.74
 -14   3  -8   21.67    2.47
   3  14  -8   25.11    2.64
 -14   3  -8   20.38    2.54
 -14   3   8   28.02    2.81
  -3 -14   8   20.16    2.45
 -14   4  -8   14.68    2.20
   4  14  -8   17.12    2.41
  -4 -14   8   10.74    2.22
 -14   4   8   16.01    2.38
 -14   5  -8   51.85    3.81
 -14   5   8   42.04    3.49
  -5 -14   8   49.25    3.95
 -14   6  -8   17.12    2.49
 -14   6   8   13.16    2.38
  -6 -14   8   13.35    2.49
 -14   7  -8   48.27    3.95
 -14   7   8   42.34    3.59
  -7 -14   8   51.62    4.34
  -5  15  -8    9.60    1.79
 -15  -5  -8   18.63    3.33
 -15  -5   8   17.58    2.88
  -4  15  -8   21.41    2.17
 -15  -4  -8   18.89    3.11
 -15  -4   8   25.17    3.05
  -3  15  -8   27.31    2.33
 -15  -3  -8   26.59    3.28
 -15  -3   8   26.18    2.99
 -15  -2  -8   13.91    2.75
 -15  -2   8    6.86    2.12
 -15  -2   8    9.23    1.98
 -15  -1  -8   25.90    3.27
 -15  -1   8   27.49    2.76
 -15   0  -8    5.29    2.20
 -15   0   8    2.17    1.89
 -15   1  -8   30.44    3.24
 -15   1   8   27.66    2.93
 -15   2  -8    7.34    2.22
 -15   2  -8    7.93    2.07
 -15   2   8    5.07    1.96
 -15   3  -8   28.17    2.90
 -15   3   8   25.02    2.96
   4  15  -8   13.45    2.43
 -15   4  -8   21.74    2.68
  -4 -15   8   20.69    2.77
 -15   4   8   20.00    2.82
 -15   5  -8   13.97    2.47
  -5 -15   8   14.54    2.61
 -15   5   8   15.32    2.68
 -16  -1  -8    1.03    2.32
 -16  -1   8    1.13    1.82
 -16   0  -8   63.18    4.89
 -16   0   8   65.65    4.64
 -16   1  -8    0.55    2.10
 -16   1   8    1.66    1.98
   0   0  -9    0.82    0.44
   0   0   9    1.08    0.34
   0  -1  -9   27.12    1.36
   1   0  -9   28.33    1.40
   0   1  -9   27.42    1.45
  -1   0  -9   26.21    1.41
   0  -1   9   28.14    1.33
   0   1   9   28.43    1.28
   1   0   9   29.10    1.28
  -1   0   9   30.75    1.48
   1   1  -9    3.00    0.59
  -1  -1  -9    4.21    0.62
   1  -1  -9    4.10    0.53
  -1   1  -9    4.48    0.63
   1  -1   9    4.74    0.51
  -1   1   9    4.49    0.52
  -1  -1   9    5.91    0.73
   1   1   9    4.51    0.44
  -1   2  -9    0.35    0.49
  -2  -1  -9    0.68    0.54
   2   1  -9    0.06    0.45
   1  -2  -9    0.09    0.36
  -2  -1   9    2.63    0.62
  -2  -1   9    1.74    0.46
  -1   2   9    2.06    0.44
   2   1   9    2.80    0.37
   1  -2   9    2.27    0.45
   0  -2  -9   72.66    2.85
   0   2  -9   70.02    2.96
  -2   0  -9   73.14    2.99
   2   0  -9   70.01    2.89
  -2   0   9   75.72    2.94
   0  -2   9   75.53    2.89
   0  -2   9   75.58    3.10
   2   0   9   71.62    2.81
   0   2   9   77.09    2.83
  -2   0   9   69.93    2.99
   2  -1  -9    2.13    0.47
   1   2  -9    2.45    0.60
  -2   1  -9    1.81    0.58
  -1  -2  -9    2.88    0.55
   1   2   9    0.61    0.28
  -1  -2   9    0.29    0.38
   2  -1   9    0.54    0.36
  -1  -2   9   -0.03    0.54
  -2   1   9   -0.16    0.38
  -2   1   9   -0.22    0.39
   2  -2  -9    1.58    0.40
  -2   2  -9    1.81    0.58
   2   2  -9    2.40    0.62
  -2  -2  -9    1.77    0.60
  -2  -2   9    2.18    0.67
   2  -2   9    2.07    0.47
  -2   2   9    2.29    0.51
  -2  -2   9    2.41    0.50
   2   2   9    2.53    0.34
  -3  -2  -9   43.58    2.17
   2  -3  -9   46.42    1.84
  -2   3  -9   45.54    2.14
  -2   3   9   54.20    2.29
   3   2   9   53.39    2.09
  -3  -2   9   53.85    2.54
   2  -3   9   55.98    2.31
  -3  -2   9   58.17    2.36
  -3  -1  -9  164.17    6.65
   1  -3  -9  186.64    6.45
  -1   3  -9  179.21    6.67
  -3  -1   9  168.86    6.78
  -3  -1   9  186.04    6.71
  -1   3   9  180.14    6.60
   3   1   9  183.73    6.53
   1  -3   9  188.01    6.65
  -3   0  -9  157.04    6.58
   0  -3  -9  177.22    6.44
   3   0  -9  181.68    6.55
   0   3  -9  186.57    6.66
   0  -3   9  187.80    6.77
  -3   0   9  168.78    6.61
   0   3   9  177.42    6.43
   3   0   9  180.02    6.46
  -3   0   9  175.42    6.58
   0  -3   9  180.44    6.53
   1   3  -9  167.10    6.50
   3  -1  -9  174.96    6.33
  -1  -3  -9  180.92    6.38
  -3   1  -9  161.71    6.45
   1   3   9  194.30    6.80
   3  -1   9  181.13    6.91
  -3   1   9  196.79    7.00
  -1  -3   9  198.93    6.96
  -3   1   9  190.63    7.01
  -1  -3   9  178.57    7.15
  -3   2  -9   52.34    2.37
  -3   2  -9   48.17    2.13
   3  -2  -9   50.50    2.09
  -2  -3  -9   54.82    2.32
   3  -2   9   45.01    1.99
  -3   2   9   44.97    2.06
   2   3   9   47.82    1.76
  -3   2   9   48.03    1.95
  -2  -3   9   43.01    2.25
  -2  -3   9   45.85    2.01
  -3   3  -9   52.80    2.31
  -3  -3  -9   48.77    2.29
  -3   3  -9   45.10    2.07
   3  -3  -9   47.27    1.92
   3  -3   9   52.95    2.25
  -3   3   9   51.40    2.29
   3   3   9   51.80    1.95
  -3  -3   9   50.17    2.24
  -3  -3   9   53.80    2.57
  -4  -3  -9  222.67    7.76
  -4  -3  -9  232.42    8.28
  -3   4  -9  217.15    8.17
   3  -4  -9  206.06    7.76
  -3   4  -9  216.89    8.01
   4   3   9  218.68    7.90
   3  -4   9  226.78    8.18
  -3   4   9  222.70    8.20
  -4  -3   9  224.67    8.46
  -4  -3   9  220.88    8.19
   2  -4  -9  146.59    5.26
  -2   4  -9  135.88    5.57
  -4  -2  -9  145.55    5.25
  -4  -2  -9  152.94    5.71
   2  -4   9  143.04    5.43
  -2   4   9  142.72    5.41
  -4  -2   9  139.68    5.47
   4   2   9  144.32    5.23
  -4  -2   9  153.36    5.70
  -1   4  -9  157.94    6.02
  -4  -1  -9  152.90    5.70
  -4  -1  -9  161.71    6.08
   1  -4  -9  156.24    5.72
  -4  -1   9  148.15    5.46
   1  -4   9  141.72    5.47
  -1   4   9  137.79    5.18
  -4  -1   9  140.77    5.34
   4   1   9  135.27    5.12
   1  -4   9  139.09    5.26
   0   4  -9  418.73   14.98
  -4   0  -9  391.78   14.67
   0  -4  -9  422.19   14.74
  -4   0  -9  421.55   14.99
   0   4   9  413.00   14.62
   4   0   9  402.97   14.67
   0  -4   9  418.58   14.74
  -4   0   9  396.08   14.83
   0  -4   9  428.22   14.98
  -4   0   9  419.08   14.83
  -1  -4  -9  139.37    5.11
   1   4  -9  141.07    5.33
  -4   1  -9  128.34    5.00
  -4   1  -9  130.03    5.26
  -1  -4   9  162.77    5.90
   4  -1   9  148.45    5.85
  -1  -4   9  164.17    6.18
  -4   1   9  171.38    5.96
   1   4   9  156.15    5.71
  -4   1   9  151.69    5.97
  -4   2  -9  130.32    5.33
   4  -2  -9  137.82    5.10
  -2  -4  -9  140.05    5.26
  -4   2  -9  139.24    5.15
   2   4   9  155.10    5.52
  -2  -4   9  153.29    5.77
  -4   2   9  157.80    5.89
   4  -2   9  148.29    5.76
  -4   2   9  156.19    5.73
  -2  -4   9  159.84    6.08
   4  -3  -9  212.79    7.80
  -4   3  -9  221.79    8.16
  -3  -4  -9  221.71    8.13
  -4   3  -9  212.67    7.97
  -4   3   9  221.53    7.97
   4  -3   9  213.64    8.12
  -3  -4   9  228.54    8.13
  -3  -4   9  215.63    8.41
  -4   3   9  228.82    8.22
  -4  -4  -9   82.05    3.50
  -4   4  -9   81.40    3.26
  -4   4  -9   75.19    3.37
   4  -4   9   86.21    3.44
  -4   4   9   85.83    3.50
  -4  -4   9   83.14    3.40
  -4  -4   9   80.78    3.71
  -5  -4  -9  118.76    5.10
  -4   5  -9  126.84    4.87
  -4   5  -9  129.30    5.00
  -4   5   9  133.61    5.17
   4  -5   9  136.99    5.16
  -5  -4   9  125.79    5.44
  -5  -4   9  133.88    5.15
  -5  -3  -9   91.68    3.29
  -3   5  -9   89.95    3.70
  -3   5  -9   91.11    3.55
  -5  -3  -9   79.56    3.77
  -5  -3   9  100.13    4.08
   3  -5   9  103.09    4.04
  -5  -3   9  100.91    4.34
  -3   5   9  102.71    4.05
  -5  -2  -9   38.43    1.61
  -5  -2  -9   34.75    2.09
  -2   5  -9   32.88    1.92
   2  -5  -9   39.36    1.51
   2  -5   9   38.36    1.86
  -5  -2   9   36.42    2.12
  -2   5   9   38.32    1.81
  -5  -2   9   39.29    1.97
  -5  -1  -9  100.68    4.25
   1  -5  -9  107.94    3.85
  -1   5  -9   98.26    4.15
  -5  -1  -9  101.79    3.86
   1  -5   9  114.31    4.93
   5   1   9  125.99    4.64
   1  -5   9  123.96    4.76
  -5  -1   9  127.04    4.88
  -5  -1   9  132.88    4.99
  -1   5   9  124.96    4.69
   0  -5  -9  100.53    3.73
  -5   0  -9   98.69    3.72
  -5   0  -9   87.05    3.99
   0   5  -9   98.47    4.02
  -5   0   9   88.73    3.79
   0   5   9   98.20    3.56
  -5   0   9   96.75    3.85
   5   0   9   88.52    3.61
   0  -5   9   95.02    3.70
   0  -5   9   99.69    3.98
  -1  -5  -9  126.05    4.75
  -5   1  -9  129.07    5.01
   1   5  -9  116.05    4.96
  -5   1  -9  123.94    4.69
  -5   1   9  105.98    4.17
  -1  -5   9  105.59    4.02
   5  -1   9  102.02    4.00
  -1  -5   9   96.90    4.28
  -5   1   9  111.79    4.11
   1   5   9  100.73    3.80
  -5   2  -9   38.09    1.83
  -5   2  -9   37.59    2.09
  -2  -5  -9   39.18    1.96
  -2  -5   9   37.83    2.20
   5  -2   9   38.32    1.85
  -2  -5   9   38.80    1.85
  -5   2   9   39.72    1.79
  -5   2   9   38.61    2.03
  -5   3  -9   94.79    4.05
  -5   3  -9   95.31    3.87
  -3  -5  -9  102.62    4.07
   5  -3  -9   97.71    3.69
  -5   3   9   88.57    3.53
  -5   3   9   93.21    3.85
   5  -3   9   96.30    3.74
  -3  -5   9   94.06    3.68
  -3  -5   9   93.25    4.05
  -4  -5  -9  134.15    5.10
   5  -4  -9  123.65    4.53
  -5   4  -9  118.99    4.97
  -5   4  -9  122.92    4.86
   5  -4   9  129.40    5.07
  -4  -5   9  124.78    5.39
  -5   4   9  130.71    5.16
  -4  -5   9  134.98    5.03
  -5   4   9  132.03    4.75
  -5   5  -9  102.88    4.14
  -5  -5  -9   94.61    4.23
  -5   5  -9   97.02    3.99
  -5   5   9  103.24    4.30
  -5  -5   9  103.39    4.61
   5  -5   9  107.65    4.27
  -5  -5   9  104.62    4.19
  -5   6  -9  137.68    5.50
  -6  -5  -9  139.16    5.75
  -5   6  -9  137.01    5.41
  -5   6   9  150.89    5.79
  -6  -5   9  153.06    5.74
   5  -6   9  148.69    5.75
  -6  -5   9  134.38    6.04
  -4   6  -9   53.22    2.47
  -4   6  -9   52.00    2.54
  -6  -4  -9   53.74    2.78
  -6  -4   9   61.52    2.66
   4  -6   9   54.45    2.61
  -6  -4   9   51.45    2.95
  -4   6   9   59.15    2.64
  -3   6  -9   45.55    2.16
  -3   6  -9   47.20    2.30
  -6  -3  -9   42.35    1.86
  -6  -3  -9   48.32    2.49
  -3   6   9   72.08    3.00
  -6  -3   9   73.74    3.11
  -6  -3   9   63.75    3.30
   3  -6   9   71.11    3.02
  -2   6  -9  103.17    4.30
  -2   6  -9  104.18    4.12
  -6  -2  -9  108.70    3.98
  -6  -2  -9  103.09    4.46
  -2   6   9   80.96    3.22
  -6  -2   9   83.68    3.59
  -6  -2   9   73.89    3.35
   2  -6   9   77.27    3.27
  -6  -1  -9   63.19    2.67
  -1   6  -9   67.19    2.99
  -6  -1  -9   65.22    3.12
   1  -6  -9   67.51    2.59
   1  -6   9   63.94    2.95
   1  -6   9   65.28    2.75
  -6  -1   9   62.79    2.94
  -1   6   9   66.46    2.63
  -6  -1   9   60.33    2.86
   0   6  -9  312.76   11.26
  -6   0  -9  283.95   11.23
   0  -6  -9  315.75   10.93
  -6   0  -9  298.46   10.93
   0  -6   9  301.19   11.26
  -6   0   9  301.58   11.15
   0  -6   9  311.88   11.03
   0   6   9  307.79   10.88
  -6   0   9  297.46   11.16
  -1  -6  -9   68.96    2.67
  -6   1  -9   61.87    2.64
   1   6  -9   58.23    2.88
  -6   1  -9   54.46    2.85
  -6   1   9   68.87    2.85
  -1  -6   9   68.15    2.77
  -6   1   9   64.90    2.96
  -1  -6   9   59.49    3.01
   1   6   9   64.95    2.49
  -6   2  -9   74.48    3.15
  -2  -6  -9   79.75    3.25
  -6   2  -9   72.04    3.39
  -6   2   9  106.39    4.41
  -2  -6   9  108.98    4.58
   6  -2   9  104.68    4.24
  -6   2   9  108.92    4.20
  -2  -6   9  109.85    4.21
  -6   3  -9   74.29    3.38
  -3  -6  -9   79.07    3.35
  -6   3  -9   71.15    3.17
  -6   3   9   45.80    2.39
  -3  -6   9   44.81    2.55
   6  -3   9   44.06    2.22
  -6   3   9   47.20    2.02
  -3  -6   9   49.19    2.18
  -6   4  -9   53.09    2.62
   6  -4  -9   50.83    2.11
  -4  -6  -9   55.46    2.71
  -6   4  -9   52.32    2.50
  -4  -6   9   59.51    2.51
  -4  -6   9   55.55    3.01
  -6   4   9   57.85    2.75
   6  -4   9   51.76    2.59
  -6   4   9   55.22    2.24
  -6   5  -9  149.71    5.94
  -5  -6  -9  149.57    6.10
  -6   5  -9  150.98    5.87
  -6   5   9  141.96    5.67
   6  -5   9  145.31    5.61
  -5  -6   9  137.00    5.49
  -5  -6   9  145.65    5.99
  -6   6  -9   58.51    2.80
  -6   6  -9   58.25    2.85
  -6  -6  -9   61.21    3.18
   6  -6   9   60.30    2.87
  -6   6   9   56.67    2.89
  -6  -6   9   56.40    3.17
  -6  -6   9   62.36    2.77
  -7  -6  -9   57.84    3.24
  -6   7  -9   54.45    2.79
  -6   7  -9   55.07    2.76
  -7  -6   9   52.68    3.23
  -6   7   9   54.55    2.90
  -7  -6   9   61.75    2.78
  -7  -5  -9  123.69    5.30
  -5   7  -9  119.87    4.91
  -5   7  -9  118.59    4.88
   5  -7   9  140.48    5.63
  -7  -5   9  145.15    6.08
  -7  -5   9  144.14    5.63
  -5   7   9  139.28    5.63
  -7  -4  -9   97.22    4.17
  -7  -4  -9   82.53    3.38
  -4   7  -9   94.04    3.74
  -4   7  -9   83.62    3.74
   4  -7   9  101.61    4.35
  -7  -4   9  108.52    4.43
  -7  -4   9  111.40    4.79
  -4   7   9  107.08    4.35
  -3   7  -9   74.17    3.15
  -7  -3  -9   71.09    3.51
  -7  -3  -9   74.38    2.92
  -3   7  -9   74.02    3.27
  -7  -3   9   71.23    3.57
   3  -7   9   75.51    3.25
  -3   7   9   77.41    3.22
  -7  -3   9   77.55    3.37
  -2   7  -9  119.09    4.79
  -7  -2  -9  117.26    4.48
  -7  -2  -9  120.95    5.04
  -2   7  -9  114.00    4.61
  -7  -2   9  128.58    5.29
   2  -7   9  126.74    4.99
  -7  -2   9  126.37    5.12
  -2   7   9  129.41    4.92
  -7  -1  -9  160.37    5.99
  -1   7  -9  156.82    6.27
   1  -7  -9  168.03    5.88
  -1   7  -9  160.20    6.06
  -7  -1  -9  152.65    6.37
   1  -7   9  175.14    6.97
   1  -7   9  183.26    6.79
  -7  -1   9  169.29    6.91
  -7  -1   9  184.87    7.03
  -1   7   9  187.71    6.68
   0  -7  -9  134.30    5.07
  -7   0  -9  128.84    5.12
   0   7  -9  133.14    5.43
  -7   0  -9  139.14    5.53
   0  -7   9  135.49    5.08
   0  -7   9  132.98    5.34
  -7   0   9  127.41    5.25
  -7   0   9  121.01    5.18
   0   7   9  139.21    4.92
  -7   1  -9  189.91    7.17
  -7   1  -9  172.65    6.81
  -1  -7  -9  185.93    6.85
   1   7  -9  178.37    7.13
  -7   1   9  167.64    6.29
  -7   1   9  157.73    6.38
  -1  -7   9  161.96    6.18
   1   7   9  163.29    5.94
  -1  -7   9  167.93    6.52
  -7   2  -9  121.53    5.36
  -7   2  -9  137.60    5.21
  -2  -7  -9  137.42    5.25
  -7   2   9  126.97    5.07
  -2  -7   9  124.09    4.81
  -2  -7   9  121.49    5.17
  -7   2   9  123.03    4.81
  -7   3  -9   69.39    3.46
  -3  -7  -9   80.07    3.45
  -7   3  -9   81.61    3.37
  -7   3   9   78.00    3.16
  -3  -7   9   79.97    3.76
  -7   3   9   80.77    3.54
  -3  -7   9   74.95    3.26
  -7   4  -9  113.49    4.49
  -4  -7  -9  106.26    4.59
  -7   4  -9  104.47    4.54
  -4  -7   9   96.92    4.34
  -7   4   9   92.79    3.60
  -7   4   9   92.24    4.08
  -4  -7   9   92.77    3.82
  -7   5  -9  137.45    5.68
  -5  -7  -9  145.01    5.88
  -7   5  -9  140.49    5.64
  -5  -7   9  121.15    4.71
  -5  -7   9  112.59    5.19
  -7   5   9  120.05    4.96
  -7   6  -9   62.60    2.98
  -6  -7  -9   58.99    3.31
  -7   6  -9   56.48    2.95
  -6  -7   9   56.30    2.71
  -7   6   9   56.00    2.95
  -6  -7   9   58.99    3.38
  -7   7  -9    2.24    0.99
  -7  -7  -9    2.12    1.31
  -7   7  -9    1.73    0.98
  -7   7   9    2.42    1.06
  -7  -7   9    1.81    1.36
  -7  -7   9    3.31    0.93
  -7   8  -9   33.27    2.25
  -8  -7  -9   42.22    3.08
  -7   8  -9   35.16    2.42
  -8  -7   9   28.45    2.01
  -8  -7   9   27.70    2.64
  -7   8   9   24.82    2.12
  -6   8  -9   42.11    2.42
  -8  -6  -9   40.81    2.96
  -6   8  -9   38.63    2.34
  -8  -6   9   52.23    2.67
  -6   8   9   51.29    2.75
  -8  -6   9   48.71    3.20
  -5   8  -9  114.96    4.69
  -5   8  -9  111.85    4.68
  -8  -5  -9  110.34    5.09
  -5   8   9  106.10    4.40
   5  -8   9  100.44    4.41
  -8  -5   9  103.89    4.43
  -8  -5   9  106.58    4.92
  -4   8  -9  105.83    4.49
  -4   8  -9  106.89    4.56
  -8  -4  -9  118.77    5.06
  -4   8   9  140.93    5.41
   4  -8   9  135.88    5.44
  -8  -4   9  139.04    5.89
  -8  -4   9  129.01    5.51
  -8  -3  -9   96.77    4.99
  -3   8  -9  126.49    4.84
  -3   8  -9  124.22    4.72
  -8  -3  -9  118.12    4.47
   3  -8   9  123.50    4.91
  -3   8   9  127.80    4.85
  -8  -3   9  114.69    5.20
  -8  -3   9  121.34    5.05
  -8  -2  -9   66.04    2.77
  -2   8  -9   63.75    3.04
  -2   8  -9   64.95    2.88
  -8  -2  -9   64.53    3.38
  -8  -2   9   64.21    3.40
  -8  -2   9   70.26    3.29
  -2   8   9   74.40    3.03
   2  -8   9   72.62    3.13
  -8  -1  -9  197.56    7.34
  -8  -1  -9  176.77    6.79
  -1   8  -9  171.45    6.81
   1  -8  -9  187.17    6.65
  -1   8  -9  173.93    7.05
  -1   8   9  160.02    5.71
   1  -8   9  143.61    6.00
   1  -8   9  150.62    5.82
  -8  -1   9  145.55    6.00
  -8  -1   9  153.98    6.09
   0  -8  -9   97.70    3.81
  -8   0  -9   93.21    3.91
   0   8  -9   95.53    4.18
  -8   0  -9   95.61    4.32
   0   8   9   96.25    3.55
   0  -8   9   80.77    3.92
  -8   0   9   89.58    3.92
  -8   0   9   89.37    3.97
   0  -8   9   94.31    3.75
   1   8  -9  156.77    6.47
  -8   1  -9  164.27    6.20
  -8   1  -9  156.93    6.47
  -1  -8  -9  162.49    6.16
  -8   1   9  173.63    6.82
  -8   1   9  176.14    6.98
   1   8   9  178.55    6.46
  -1  -8   9  179.54    6.71
  -1  -8   9  179.97    7.06
  -8   2  -9   77.69    3.32
  -2  -8  -9   75.26    3.29
  -8   2  -9   67.56    3.50
  -2  -8   9   67.03    3.28
  -8   2   9   63.11    3.17
  -8   2   9   61.43    2.85
  -2  -8   9   65.00    2.85
  -8   3  -9  125.76    5.20
  -3  -8  -9  133.26    5.33
  -8   3  -9  128.47    5.40
  -8   3   9  123.24    4.98
  -3  -8   9  132.80    5.07
  -8   3   9  128.42    5.38
  -3  -8   9  133.42    5.55
  -8   4  -9  141.60    5.63
  -8   4  -9  138.45    5.74
  -4  -8  -9  137.67    5.76
  -8   4   9  111.16    4.71
  -4  -8   9  100.85    4.86
  -4  -8   9  114.03    4.41
  -5  -8  -9  104.95    4.82
  -8   5  -9  109.64    4.68
  -8   5  -9  110.05    4.64
  -5  -8   9  120.98    5.34
  -5  -8   9  117.67    4.68
  -8   5   9  110.30    4.98
  -8   6  -9   52.22    2.90
  -8   6  -9   53.68    2.89
  -6  -8  -9   56.88    3.27
  -6  -8   9   37.88    2.21
  -8   6   9   38.75    2.58
  -6  -8   9   42.23    3.00
  -8   7  -9   31.04    2.17
  -8   7  -9   31.95    2.31
  -7  -8  -9   29.00    2.59
  -7  -8   9   32.22    2.04
  -8   7   9   32.35    2.48
  -7  -8   9   32.10    2.94
  -8  -8  -9   21.83    2.34
  -8   8  -9   18.60    1.83
  -8  -8   9   18.79    1.62
  -8   8   9   24.13    2.02
  -8  -8   9   20.39    2.40
  -8   9  -9   41.08    2.79
  -9  -8  -9   39.86    3.43
  -8   9   9   29.52    2.31
  -9  -8   9   31.41    2.99
  -7   9  -9   31.05    2.36
  -9  -7  -9   32.45    3.00
  -9  -7   9   25.22    2.69
  -7   9   9   31.53    2.39
  -9  -7   9   34.12    2.25
  -6   9  -9   36.88    2.50
  -6   9  -9   41.85    2.40
  -9  -6  -9   41.94    3.10
  -9  -6   9   40.38    3.13
  -6   9   9   33.94    2.33
  -9  -6   9   38.30    2.40
  -5   9  -9  110.18    4.68
  -9  -5  -9  116.41    5.27
  -5   9  -9  107.10    4.63
  -5   9   9  107.43    4.64
  -9  -5   9  115.63    5.30
  -9  -5   9  115.03    4.80
   5  -9   9  109.00    4.73
  -4   9  -9  102.31    4.27
  -4   9  -9  100.62    4.22
  -9  -4  -9   94.28    4.70
   4  -9   9  105.13    4.45
  -9  -4   9  103.95    4.91
  -9  -4   9  107.68    4.62
  -4   9   9  103.73    4.37
  -9  -3  -9   48.47    3.01
  -9  -3  -9   48.93    2.91
  -3   9  -9   43.72    2.39
  -3   9  -9   45.41    2.46
  -9  -3   9   45.46    2.86
  -3   9   9   44.78    2.29
  -9  -3   9   45.17    2.63
   3  -9   9   41.23    2.39
  -9  -2  -9  134.48    5.29
  -9  -2  -9  138.83    5.93
  -2   9  -9  138.00    5.57
  -2   9  -9  134.91    5.37
   2  -9   9  140.35    5.56
  -2   9   9  141.66    5.43
  -9  -2   9  141.25    5.90
  -9  -2   9  137.54    5.78
  -9  -1  -9  112.10    5.15
  -1   9  -9  121.34    4.95
  -1   9  -9  119.97    4.70
  -9  -1  -9  113.93    4.66
   1  -9   9  127.99    4.99
   1  -9   9  121.14    5.15
  -1   9   9  132.72    4.84
  -9  -1   9  114.78    5.19
  -9  -1   9  123.68    5.24
   0   9  -9  199.18    8.04
   0  -9  -9  213.48    7.67
  -9   0  -9  205.11    7.79
  -9   0  -9  199.31    8.19
   0   9  -9  209.89    7.73
   0   9   9  211.26    7.45
   0  -9   9  201.78    7.63
  -9   0   9  192.12    7.91
  -9   0   9  206.19    7.86
   0  -9   9  198.45    7.91
  -9   1  -9  132.18    5.67
  -1  -9  -9  139.41    5.29
   1   9  -9  131.31    5.64
  -9   1  -9  129.13    5.32
  -1  -9   9  121.01    4.79
  -9   1   9  126.53    5.17
  -9   1   9  112.91    4.89
  -1  -9   9  120.07    5.12
  -9   2  -9  154.64    6.36
   2   9  -9  151.61    6.42
  -2  -9  -9  158.05    6.14
  -9   2  -9  150.80    6.10
  -2  -9   9  130.47    5.76
  -2  -9   9  139.06    5.37
  -9   2   9  140.39    5.75
  -9   2   9  137.53    5.44
  -3  -9  -9   50.73    2.73
  -9   3  -9   46.96    2.81
  -9   3  -9   46.56    2.66
  -3  -9   9   48.01    2.38
  -9   3   9   48.33    2.87
  -9   3   9   47.60    2.48
  -3  -9   9   45.54    2.90
  -9   4  -9  110.62    4.80
  -9   4  -9  113.37    4.90
  -4  -9  -9  111.74    4.93
  -9   4   9  105.89    4.68
  -4  -9   9  109.51    4.27
  -4  -9   9   93.64    4.77
  -9   5  -9  119.66    5.22
  -9   5  -9  123.70    5.28
  -5  -9  -9  124.79    5.51
  -5  -9   9  116.11    4.67
  -9   5   9  122.59    5.14
  -5  -9   9  107.19    5.27
  -9   6  -9   38.28    2.53
  -9   6  -9   37.45    2.66
  -6  -9  -9   40.69    2.92
  -6  -9   9   37.74    2.98
  -6  -9   9   39.22    2.25
  -9   6   9   41.93    2.79
  -7  -9  -9   37.40    3.12
  -9   7  -9   31.66    2.42
  -9   7  -9   33.25    2.55
  -7  -9   9   30.74    2.10
  -9   7   9   29.91    2.52
  -7  -9   9   30.63    2.89
  -9   8  -9   33.47    2.59
  -8  -9  -9   36.54    3.29
  -8  -9   9   33.91    3.15
  -9   8   9   31.38    2.62
  -9  -9  -9   22.97    2.78
  -9   9  -9   23.77    2.24
  -9   9   9   22.52    2.18
  -9  -9   9   22.31    2.73
  -9  10  -9    3.95    1.53
 -10  -9  -9    8.95    2.32
 -10  -9   9    1.70    1.99
  -9  10   9    3.18    1.46
  -8  10  -9   14.97    1.80
 -10  -8  -9   16.24    2.44
 -10  -8   9   15.47    2.43
  -8  10   9   13.87    1.74
 -10  -7  -9    6.60    2.04
  -7  10  -9    6.26    1.33
 -10  -7   9    5.02    1.48
  -7  10   9    4.97    1.29
 -10  -7   9    5.30    1.91
 -10  -6  -9   24.11    2.57
  -6  10  -9   25.53    2.02
 -10  -6   9   25.66    2.60
  -6  10   9   24.66    1.94
 -10  -6   9   24.21    2.01
  -5  10  -9   51.21    2.85
 -10  -5  -9   53.78    3.53
 -10  -5   9   52.93    2.98
  -5  10   9   53.12    2.77
 -10  -5   9   49.51    3.39
  -4  10  -9   80.10    3.76
 -10  -4  -9   88.18    4.51
  -4  10  -9   82.18    3.74
 -10  -4   9   75.45    4.10
   4 -10   9   73.88    3.53
 -10  -4   9   72.14    3.71
  -4  10   9   79.53    3.44
  -3  10  -9   73.28    3.50
 -10  -3  -9   78.65    4.16
  -3  10  -9   76.00    3.45
 -10  -3   9   74.33    3.75
   3 -10   9   77.23    3.56
  -3  10   9   78.67    3.42
 -10  -3   9   81.04    4.08
 -10  -2  -9   82.80    3.57
  -2  10  -9   82.51    3.64
  -2  10  -9   82.57    3.78
 -10  -2  -9   81.08    4.25
 -10  -2   9   82.49    4.01
  -2  10   9   86.88    3.58
 -10  -2   9   85.35    4.13
   2 -10   9   82.31    3.73
  -1  10  -9  114.98    4.97
  -1  10  -9  119.43    4.76
 -10  -1  -9  111.10    4.75
 -10  -1  -9  121.99    5.38
 -10  -1   9  113.41    5.07
   1 -10   9  120.04    4.75
  -1  10   9  120.16    4.69
 -10  -1   9  107.33    4.99
   1 -10   9  115.07    4.96
   0  10  -9  129.10    5.42
 -10   0  -9  119.90    5.09
 -10   0  -9  123.48    5.63
   0  10  -9  130.47    5.06
 -10   0   9  116.92    5.18
   0 -10   9  127.52    4.96
   0 -10   9  121.54    5.24
 -10   0   9  123.91    5.35
  -1 -10  -9  122.83    5.35
   1  10  -9  117.18    4.85
 -10   1  -9  122.98    5.41
   1  10  -9  126.56    5.35
 -10   1  -9  119.20    5.04
 -10   1   9  111.66    4.78
 -10   1   9  109.48    4.99
  -1 -10   9  115.91    4.59
  -1 -10   9  112.53    4.96
 -10   2  -9   87.36    3.98
   2  10  -9   87.82    4.35
  -2 -10  -9   95.49    4.03
 -10   2  -9   84.95    4.25
 -10   2   9   78.95    4.09
  -2 -10   9   82.06    3.63
  -2 -10   9   85.77    4.13
 -10   2   9   88.83    3.78
  -3 -10  -9   87.09    3.96
 -10   3  -9   85.88    3.93
 -10   3  -9   74.58    3.96
  -3 -10   9   78.47    3.45
 -10   3   9   80.29    3.99
  -3 -10   9   77.62    4.00
  -4 -10  -9   80.14    4.02
 -10   4  -9   83.42    4.04
 -10   4  -9   79.29    3.90
  -4 -10   9   83.08    4.33
 -10   4   9   86.46    4.21
  -4 -10   9   83.11    3.64
 -10   5  -9   56.89    3.31
 -10   5  -9   56.91    3.29
  -5 -10  -9   63.98    3.50
  -5 -10   9   54.80    2.64
  -5 -10   9   50.71    3.44
 -10   5   9   49.77    3.23
 -10   6  -9   27.82    2.32
  -6 -10  -9   25.83    2.51
 -10   6  -9   26.96    2.41
  -6 -10   9   29.79    2.79
 -10   6   9   27.84    2.39
 -10   7  -9    5.99    1.55
  -7 -10  -9    2.83    1.68
  -7 -10   9    4.13    1.81
 -10   7   9    4.30    1.50
 -10   8  -9   15.37    1.98
  -8 -10  -9   16.30    2.46
 -10   8   9   15.71    1.99
  -8 -10   9   22.00    2.73
 -10   9  -9    7.23    1.68
  -9 -10  -9    6.51    2.14
  -9 -10   9    1.87    1.95
 -10   9   9    3.87    1.56
 -10  10  -9   10.76    2.00
 -10 -10  -9   13.78    2.67
 -10  10   9   10.33    1.86
 -10 -10   9   17.00    2.68
 -10  11  -9    0.59    1.66
 -11 -10  -9    2.81    2.33
 -10  11   9   -0.02    1.50
 -11 -10   9    5.90    2.45
  -9  11  -9    5.15    1.66
 -11  -9  -9    7.57    2.35
  -9  11   9    5.30    1.60
  -8  11  -9   13.24    1.83
 -11  -8  -9   19.46    2.86
  -8  11   9   10.94    1.68
 -11  -8   9    9.43    2.37
  -7  11  -9    6.79    1.44
 -11  -7  -9    9.26    2.33
  -7  11   9    4.36    1.35
 -11  -7   9    6.48    2.04
 -11  -6  -9   20.78    2.72
  -6  11  -9   22.41    1.97
 -11  -6   9   14.62    1.71
 -11  -6   9   13.53    2.33
  -6  11   9   12.85    1.59
 -11  -5  -9   70.09    4.38
  -5  11  -9   72.67    3.60
  -5  11   9   79.87    3.71
 -11  -5   9   81.63    4.54
 -11  -5   9   75.89    3.95
 -11  -4  -9   50.35    3.60
  -4  11  -9   45.08    2.69
 -11  -4   9   33.75    2.61
   4 -11   9   36.57    2.40
 -11  -4   9   36.24    3.09
  -4  11   9   35.22    2.24
  -3  11  -9   35.09    2.30
 -11  -3  -9   40.13    3.23
  -3  11  -9   40.90    2.38
  -3  11   9   50.29    2.52
 -11  -3   9   46.06    2.90
   3 -11   9   46.88    2.68
 -11  -3   9   44.88    3.25
  -2  11  -9   65.60    3.09
  -2  11  -9   64.92    3.26
 -11  -2  -9   57.56    3.78
 -11  -2   9   51.78    3.12
   2 -11   9   50.79    2.72
 -11  -2   9   49.95    3.26
 -11  -1  -9   78.65    4.31
  -1  11  -9   83.80    3.63
 -11  -1  -9   78.66    3.65
  -1  11  -9   80.23    3.86
 -11  -1   9   92.95    4.48
   1 -11   9   94.59    4.05
 -11  -1   9   89.96    4.43
   1 -11   9   94.94    4.30
 -11   0  -9   29.64    2.75
   0  11  -9   36.04    2.52
 -11   0  -9   38.51    2.42
   0  11  -9   33.58    2.06
 -11   0   9   31.30    2.46
   0 -11   9   37.13    2.17
 -11   0   9   32.02    2.51
   0 -11   9   32.21    2.40
   1  11  -9   98.72    4.12
 -11   1  -9   96.07    4.32
   1  11  -9   96.61    4.55
 -11   1  -9   94.95    4.71
  -1 -11   9   84.09    4.11
  -1 -11   9   86.19    3.69
 -11   1   9   86.02    4.22
 -11   1   9   78.73    3.94
   2  11  -9   53.60    3.30
 -11   2  -9   53.81    3.05
 -11   2  -9   49.25    3.22
   2  11  -9   54.83    2.63
 -11   2   9   64.07    3.58
  -2 -11   9   61.75    2.99
  -2 -11   9   59.57    3.50
 -11   3  -9   50.41    3.10
 -11   3  -9   47.93    3.14
  -3 -11  -9   56.85    3.07
  -3 -11   9   38.46    2.26
 -11   3   9   38.04    2.91
  -3 -11   9   38.00    2.87
  -4 -11  -9   40.15    2.82
 -11   4  -9   38.29    2.75
 -11   4  -9   40.36    2.89
 -11   4   9   43.93    3.22
  -4 -11   9   46.60    2.52
  -4 -11   9   50.23    3.33
 -11   5  -9   77.57    4.16
  -5 -11  -9   82.07    4.35
 -11   5  -9   84.86    4.16
 -11   5   9   76.29    4.12
  -5 -11   9   73.19    4.29
  -6 -11  -9   17.22    2.28
 -11   6  -9   16.46    1.97
 -11   6   9   16.45    2.09
  -6 -11   9   21.64    2.49
 -11   7  -9   10.46    1.85
  -7 -11  -9    6.89    1.94
  -7 -11   9    7.33    2.11
 -11   7   9    8.45    1.78
  -8 -11  -9   18.04    2.56
 -11   8  -9   11.19    2.02
 -11   8   9    9.42    1.87
  -8 -11   9   14.48    2.50
  -9 -11  -9    2.48    2.08
 -11   9  -9    5.55    1.79
  -9 -11   9    6.34    2.25
 -11   9   9    4.20    1.70
 -11  10  -9    3.46    1.80
 -10 -11  -9    2.92    2.26
 -11  10   9    1.44    1.60
 -10 -11   9    2.48    2.26
 -11 -11  -9   -1.97    2.35
 -11  11  -9   -0.40    1.72
 -11  11   9   -1.50    1.60
 -11 -11   9    3.70    2.36
 -12 -10  -9    8.25    2.66
 -10  12  -9    4.41    1.87
 -10  12   9    2.94    1.67
 -12  -9  -9   10.85    2.74
  -9  12  -9    9.64    1.94
  -9  12   9    6.24    1.71
 -12  -9   9    4.32    2.42
 -12  -8  -9   18.35    2.97
  -8  12  -9   16.41    2.03
 -12  -8   9   24.95    3.08
  -8  12   9   17.43    2.01
 -12  -7  -9   17.72    2.82
  -7  12  -9    8.93    1.65
  -7  12   9   12.91    1.74
 -12  -7   9   12.50    2.48
 -12  -6  -9   27.80    3.07
  -6  12  -9   25.26    2.15
 -12  -6   9   32.28    3.21
  -6  12   9   26.59    2.13
 -12  -5  -9   56.29    4.13
  -5  12  -9   58.21    3.23
  -5  12   9   48.19    2.89
 -12  -5   9   56.10    3.90
 -12  -5   9   49.14    3.27
 -12  -4  -9   64.91    4.35
  -4  12  -9   59.92    3.29
 -12  -4   9   58.47    3.63
 -12  -4   9   67.74    4.07
  -4  12   9   60.30    3.16
 -12  -3  -9   64.10    4.16
  -3  12  -9   60.15    3.20
 -12  -3   9   49.98    3.52
 -12  -3   9   48.75    3.21
   3 -12   9   54.29    2.98
 -12  -2  -9   61.43    4.09
  -2  12  -9   66.12    3.23
 -12  -2   9   63.19    3.73
 -12  -2   9   63.99    3.67
   2 -12   9   62.99    3.21
  -1  12  -9   55.29    2.77
 -12  -1  -9   49.06    3.56
  -1  12  -9   47.94    3.01
 -12  -1   9   50.52    3.24
   1 -12   9   42.64    2.86
   1 -12   9   50.15    2.74
 -12  -1   9   50.85    3.27
   0  12  -9  100.89    4.30
   0  12  -9  100.05    4.68
 -12   0  -9   93.27    4.45
 -12   0  -9  103.98    5.09
 -12   0   9   93.67    4.70
 -12   0   9   97.76    4.64
   0 -12   9  101.47    4.62
   0 -12   9   97.28    4.28
 -12   1  -9   53.70    3.50
   1  12  -9   53.27    2.74
 -12   1  -9   50.82    3.10
   1  12  -9   49.16    3.17
 -12   1   9   46.97    2.92
  -1 -12   9   49.88    2.63
  -1 -12   9   45.66    2.98
 -12   1   9   47.47    3.27
   2  12  -9   73.41    3.40
 -12   2  -9   75.24    4.17
   2  12  -9   71.48    3.99
 -12   2  -9   74.94    3.87
  -2 -12   9   61.95    3.11
 -12   2   9   62.70    3.80
  -2 -12   9   66.26    3.66
 -12   3  -9   56.14    3.59
 -12   3  -9   55.67    3.39
   3  12  -9   57.93    3.61
  -3 -12   9   57.34    3.60
  -3 -12   9   63.13    3.71
 -12   3   9   54.91    3.65
 -12   4  -9   63.74    3.82
 -12   4  -9   70.26    3.94
  -4 -12  -9   69.90    4.86
 -12   4   9   64.61    4.03
  -4 -12   9   63.65    3.94
 -12   5  -9   61.84    3.92
  -5 -12  -9   59.02    3.74
 -12   5  -9   56.24    3.74
  -5 -12   9   50.23    3.68
 -12   5   9   49.67    3.57
 -12   6  -9   29.59    2.62
  -6 -12  -9   28.78    2.89
 -12   6   9   22.49    2.41
  -6 -12   9   22.11    2.71
  -7 -12  -9   16.89    2.50
 -12   7  -9   14.01    2.16
 -12   7   9   13.36    2.20
  -7 -12   9   16.96    2.61
 -12   8  -9   18.51    2.37
  -8 -12  -9   22.27    2.95
 -12   8   9   15.53    2.23
  -8 -12   9   17.66    2.77
  -9 -12  -9    8.53    2.55
 -12   9  -9    8.50    2.08
 -12   9   9    6.11    2.00
  -9 -12   9   10.82    2.58
 -10 -12  -9   11.42    2.79
 -12  10  -9    5.13    2.01
 -12  10   9    4.01    1.84
 -10 -12   9    8.73    2.69
  -9  13  -9    9.57    2.05
 -13  -9  -9   12.36    3.20
 -13  -9   9   13.99    3.27
  -9  13   9   10.29    1.92
 -13  -8  -9   20.24    3.19
  -8  13  -9   15.06    2.08
 -13  -8   9   10.25    2.78
  -8  13   9    9.94    1.86
 -13  -7  -9    7.25    2.62
  -7  13  -9    5.59    1.59
  -7  13   9   10.64    1.73
 -13  -7   9   13.19    2.64
  -6  13  -9   14.75    1.85
 -13  -6  -9   13.61    2.66
  -6  13   9   15.55    1.79
 -13  -6   9    8.67    2.34
 -13  -5  -9   39.87    3.66
  -5  13  -9   30.80    2.61
 -13  -5   9   34.51    3.28
 -13  -4  -9   53.04    4.17
  -4  13  -9   46.79    2.99
 -13  -4   9   47.50    3.67
 -13  -4   9   38.21    3.19
 -13  -3  -9   47.87    4.16
  -3  13  -9   52.20    3.02
 -13  -3   9   52.25    3.82
 -13  -3   9   44.60    3.32
  -2  13  -9   93.53    4.31
 -13  -2  -9   96.83    5.32
 -13  -2   9   87.62    4.75
   2 -13   9   97.17    4.30
 -13  -2   9   88.55    4.68
 -13  -1  -9   88.89    5.03
  -1  13  -9   91.52    4.15
 -13  -1   9   75.07    4.39
   1 -13   9   83.12    3.84
 -13  -1   9   77.29    4.33
   0  13  -9  102.79    4.89
   0  13  -9  103.29    4.50
 -13   0  -9  103.68    5.03
 -13   0  -9  102.57    5.34
   0 -13   9  102.64    4.99
   0 -13   9  111.60    4.68
 -13   0   9  107.01    5.30
 -13   0   9  106.26    5.09
 -13   1  -9   77.87    4.14
 -13   1  -9   83.17    4.64
   1  13  -9   81.42    3.76
   1  13  -9   81.20    4.31
  -1 -13   9   83.83    3.90
  -1 -13   9   84.81    4.39
 -13   1   9   87.97    4.65
   2  13  -9   93.37    4.90
 -13   2  -9   97.91    4.76
 -13   2  -9  101.10    5.05
  -2 -13   9   97.13    4.89
 -13   2   9   96.85    5.20
 -13   3  -9   51.94    3.61
 -13   3  -9   47.70    3.30
   3  13  -9   44.38    3.36
 -13   3   9   43.37    3.68
  -3 -13   9   47.65    3.39
 -13   4  -9   51.92    3.60
 -13   4  -9   53.63    3.56
  -4 -13   9   49.12    3.72
 -13   4   9   46.16    3.67
 -13   5  -9   37.73    2.99
 -13   5   9   32.03    2.87
  -5 -13   9   34.47    3.13
  -6 -13  -9   13.85    2.55
 -13   6  -9   12.03    2.07
  -6 -13   9   15.06    2.54
 -13   6   9   16.90    2.42
  -7 -13  -9   12.85    2.44
 -13   7  -9   13.05    2.19
 -13   7   9    7.77    2.12
  -7 -13   9   10.50    2.50
 -13   8  -9   12.39    2.30
  -8 -13  -9   15.06    2.74
  -8 -13   9   16.85    2.82
 -13   8   9   12.36    2.33
 -13   9  -9   10.05    2.47
  -9 -13  -9   11.66    2.78
  -9 -13   9    9.94    2.75
 -13   9   9    6.77    2.39
  -7  14  -9    8.36    1.77
 -14  -7  -9   12.26    3.13
 -14  -7   9   13.96    2.83
 -14  -6  -9   15.16    3.13
  -6  14  -9   19.45    2.12
 -14  -6   9   16.74    2.81
  -5  14  -9   43.34    3.01
 -14  -5  -9   37.26    3.81
 -14  -5   9   34.87    3.42
 -14  -4  -9   49.31    4.25
  -4  14  -9   40.18    2.97
 -14  -4   9   42.92    3.79
 -14  -3  -9   53.13    4.50
  -3  14  -9   55.41    3.23
 -14  -3   9   41.82    3.59
 -14  -3   9   44.67    3.45
  -2  14  -9   39.95    2.77
 -14  -2  -9   41.97    3.77
 -14  -2   9   44.62    3.49
 -14  -2   9   39.67    3.40
  -1  14  -9   61.85    3.38
 -14  -1  -9   65.47    4.57
 -14  -1   9   61.41    4.03
 -14  -1   9   54.26    3.76
   1 -14   9   65.31    3.38
 -14   0  -9   65.49    4.45
 -14   0   9   57.67    3.98
 -14   1  -9   59.54    4.18
 -14   1  -9   62.46    3.79
 -14   1   9   54.72    4.04
   2  14  -9   42.06    3.20
 -14   2  -9   36.82    3.01
 -14   2  -9   44.17    3.69
 -14   2   9   39.83    3.25
  -2 -14   9   37.51    3.22
   3  14  -9   46.76    3.60
 -14   3  -9   50.87    3.84
 -14   3  -9   47.37    3.53
 -14   3   9   53.37    3.95
  -3 -14   9   52.70    3.78
 -14   4  -9   40.71    3.13
   4  14  -9   35.45    3.32
 -14   4   9   44.74    3.65
  -4 -14   9   42.16    3.55
 -14   5  -9   36.93    3.12
  -5 -14   9   39.53    3.46
 -14   5   9   34.81    3.22
 -14   6  -9   12.19    2.32
 -14   6   9   16.84    2.58
  -6 -14   9   17.78    2.69
 -14   7  -9   14.13    2.51
 -14   7   9    6.59    2.27
  -7 -14   9    9.26    2.46
 -15  -5  -9   27.12    3.85
  -5  15  -9   27.61    2.46
 -15  -5   9   24.25    3.17
 -15  -4  -9   33.65    3.76
  -4  15  -9   27.57    2.45
 -15  -4   9   26.90    3.22
 -15  -3  -9   32.70    3.76
  -3  15  -9   26.55    2.36
 -15  -3   9   22.81    2.83
 -15  -2  -9   19.15    2.95
 -15  -2   9   14.34    2.40
 -15  -2   9   14.52    2.25
 -15  -1  -9   30.08    3.45
 -15  -1   9   22.86    2.64
 -15   0  -9   23.07    2.99
 -15   0   9   21.69    2.65
 -15   1  -9   23.64    2.92
 -15   1   9   27.33    2.94
 -15   2  -9   15.39    2.30
 -15   2  -9   18.49    2.69
 -15   2   9   15.88    2.50
 -15   3  -9   17.86    2.45
 -15   3   9   23.58    2.95
   4  15  -9   25.26    2.92
 -15   4  -9   26.36    2.84
  -4 -15   9   30.04    3.15
 -15   4   9   32.41    3.34
 -15   5  -9   19.35    2.73
   5  15  -9   21.57    2.91
  -5 -15   9   26.40    3.13
 -15   5   9   25.67    3.16
   0   0 -10    0.07    0.43
   0   0  10    0.25    0.35
  -1   0 -10  769.71   28.33
   0   1 -10  799.17   28.36
   0  -1 -10  808.19   28.29
   1   0 -10  823.76   28.32
   0   1  10  829.04   28.80
   0  -1  10  811.07   28.82
  -1   0  10  809.44   28.83
   1   0  10  823.62   28.79
   1   1 -10   10.40    0.98
   1  -1 -10   10.83    0.87
  -1  -1 -10   10.78    0.96
  -1   1 -10   11.04    1.00
  -1  -1  10   12.09    1.06
   1  -1  10   10.97    0.81
   1   1  10   10.51    0.73
  -1   1  10   11.79    0.84
  -1  -1  10   11.68    0.86
   2   1 -10  530.67   19.12
  -1   2 -10  527.34   19.12
   1  -2 -10  554.80   18.97
  -2  -1 -10  524.40   19.10
  -2  -1  10  552.68   19.59
  -1   2  10  554.29   19.54
  -2  -1  10  527.29   19.72
   1  -2  10  556.34   19.55
   2   1  10  568.98   19.47
   2   0 -10    1.16    0.51
   0   2 -10    0.55    0.51
  -2   0 -10    0.47    0.53
   0  -2 -10    0.12    0.43
   0  -2  10    0.36    0.39
   0   2  10    0.79    0.35
  -2   0  10    0.64    0.46
   2   0  10    1.01    0.36
   0  -2  10    0.57    0.58
  -2   0  10    0.04    0.50
  -1  -2 -10  541.90   18.68
   2  -1 -10  528.41   18.61
  -2   1 -10  498.06   18.73
   1   2 -10  525.68   18.77
  -2   1  10  590.76   20.47
  -1  -2  10  540.58   20.58
   1   2  10  582.15   20.30
  -2   1  10  578.90   20.43
   2  -1  10  577.98   20.37
  -1  -2  10  586.08   20.42
  -2   2 -10    1.29    0.58
  -2  -2 -10    1.11    0.59
   2   2 -10    1.26    0.60
   2  -2 -10    1.39    0.42
  -2  -2  10    1.89    0.69
   2   2  10    1.28    0.32
  -2  -2  10    1.52    0.49
   2  -2  10    1.23    0.44
  -2   2  10    1.25    0.48
   2  -3 -10  202.44    7.60
  -3  -2 -10  217.97    7.92
  -2   3 -10  212.59    7.89
   2  -3  10  224.08    8.00
  -3  -2  10  219.37    8.04
   3   2  10  217.83    7.82
  -3  -2  10  225.22    8.25
  -2   3  10  209.56    7.98
   3   1 -10    6.11    0.79
  -1   3 -10    5.89    0.82
   1  -3 -10    6.28    0.63
  -3  -1 -10    6.78    0.90
   1  -3  10    4.49    0.59
  -3  -1  10    4.52    0.78
  -3  -1  10    5.17    0.70
  -1   3  10    3.40    0.53
   3   1  10    5.24    0.50
   0   3 -10  426.54   16.18
   0  -3 -10  453.14   16.01
   3   0 -10  439.43   16.09
  -3   0 -10  477.51   16.23
   0  -3  10  431.84   16.80
  -3   0  10  471.38   16.68
  -3   0  10  467.33   16.73
   3   0  10  480.26   16.55
   0   3  10  463.19   16.52
   0  -3  10  487.16   16.63
   1   3 -10    3.60    0.70
  -3   1 -10    4.96    0.77
  -1  -3 -10    4.94    0.69
   3  -1 -10    5.24    0.64
   3  -1  10    4.81    0.59
  -3   1  10    5.98    0.72
   1   3  10    6.37    0.51
  -3   1  10    7.18    0.75
  -1  -3  10    6.22    0.87
  -1  -3  10    5.36    0.63
  -2  -3 -10  203.00    7.62
   2   3 -10  214.17    7.78
   3  -2 -10  206.30    7.45
  -3   2 -10  195.77    7.68
  -3   2  10  212.22    7.81
   3  -2  10  218.14    7.85
  -2  -3  10  215.14    7.86
  -2  -3  10  223.69    8.14
   2   3  10  218.16    7.65
  -3   2  10  202.50    7.88
  -3   3 -10   35.84    1.92
  -3  -3 -10   38.53    1.99
   3  -3 -10   36.49    1.58
  -3  -3  10   38.83    2.11
   3  -3  10   40.26    1.84
  -3   3  10   34.65    1.84
   3   3  10   40.01    1.52
  -3  -3  10   37.62    1.83
   3  -4 -10  211.39    7.72
  -3   4 -10  223.38    8.14
  -4  -3 -10  201.10    8.13
  -3   4 -10  217.19    7.94
  -4  -3 -10  225.78    7.69
  -4  -3  10  214.24    8.46
   3  -4  10  222.59    8.19
   4   3  10  223.41    7.92
  -4  -3  10  226.04    8.22
  -3   4  10  226.07    8.22
  -4  -2 -10   15.25    1.37
   2  -4 -10   15.28    0.88
  -4  -2 -10   15.82    0.86
  -2   4 -10   16.07    1.29
   2  -4  10   23.85    1.37
   4   2  10   24.58    1.11
  -2   4  10   22.75    1.34
  -4  -2  10   21.70    1.63
  -4  -2  10   25.29    1.46
  -4  -1 -10  385.41   13.93
  -1   4 -10  399.65   14.27
  -4  -1 -10  387.78   14.29
   1  -4 -10  397.36   13.98
   1  -4  10  384.31   13.58
   4   1  10  385.79   13.46
  -4  -1  10  387.36   13.66
  -1   4  10  372.45   13.50
  -4  -1  10  363.38   13.75
  -4   0 -10    2.68    0.51
   0   4 -10    3.10    0.73
  -4   0 -10    3.46    0.84
   0  -4 -10    2.15    0.52
   0   4  10    2.96    0.45
  -4   0  10    2.71    0.67
   0  -4  10    2.82    0.58
   4   0  10    3.64    0.52
   0  -4  10    1.98    0.76
  -4   0  10    2.97    0.70
  -4   1 -10  370.86   13.13
   4  -1 -10  356.65   13.20
  -4   1 -10  368.05   13.40
  -1  -4 -10  378.51   13.23
   1   4 -10  361.83   13.43
  -4   1  10  408.05   14.68
   4  -1  10  402.57   14.60
  -4   1  10  397.82   14.71
  -1  -4  10  435.41   14.95
   1   4  10  400.09   14.46
  -1  -4  10  413.36   14.64
   4  -2 -10   22.09    1.22
  -4   2 -10   19.52    1.25
  -4   2 -10   23.82    1.57
  -2  -4 -10   23.71    1.46
   2   4  10   17.65    0.81
  -2  -4  10   18.41    1.55
  -4   2  10   16.88    1.07
   4  -2  10   16.28    1.13
  -4   2  10   15.24    1.27
  -2  -4  10   17.13    1.15
   4  -3 -10  207.71    7.69
  -3  -4 -10  218.11    8.03
  -4   3 -10  218.39    7.85
  -4   3 -10  209.07    8.04
  -4   3  10  228.89    8.32
   4  -3  10  234.85    8.47
  -3  -4  10  235.83    8.80
  -4   3  10  230.45    8.54
  -3  -4  10  223.53    8.45
  -4   4 -10   82.14    3.42
  -4  -4 -10   80.11    3.45
  -4   4 -10   76.83    3.21
   4  -4 -10   73.50    2.90
  -4  -4  10   81.87    3.73
   4  -4  10   79.09    3.37
  -4   4  10   83.85    3.44
  -4  -4  10   82.67    3.37
  -5  -4 -10  168.82    6.51
  -4   5 -10  164.99    6.22
  -4   5 -10  157.22    6.33
  -5  -4  10  186.21    7.04
  -4   5  10  192.41    7.07
   4  -5  10  182.15    7.01
  -5  -4  10  184.99    7.36
  -3   5 -10   49.19    2.40
  -5  -3 -10   48.49    1.92
  -3   5 -10   46.28    2.16
  -5  -3 -10   47.56    2.53
  -5  -3  10   48.05    2.37
  -5  -3  10   51.20    2.66
   3  -5  10   50.92    2.34
  -3   5  10   51.37    2.34
  -5  -2 -10  244.10    8.56
   2  -5 -10  242.90    8.52
  -5  -2 -10  222.52    8.98
  -2   5 -10  243.03    8.94
  -2   5  10  215.16    8.02
   5   2  10  219.86    7.86
  -5  -2  10  213.30    8.13
  -5  -2  10  222.21    8.33
   2  -5  10  222.27    8.08
   1  -5 -10   12.21    0.86
  -5  -1 -10   12.77    1.27
  -1   5 -10   12.56    1.14
  -5  -1 -10   11.01    0.88
   5   1  10   13.94    0.93
  -5  -1  10   13.43    1.25
   1  -5  10   15.07    1.38
   1  -5  10   14.65    1.08
  -5  -1  10   11.84    1.11
  -1   5  10   13.76    1.01
  -5   0 -10  524.99   18.37
   0   5 -10  473.83   18.29
  -5   0 -10  494.36   18.00
   0  -5 -10  534.67   18.06
   5   0  10  508.88   18.12
  -5   0  10  503.18   18.29
   0  -5  10  536.81   18.48
   0   5  10  508.40   18.05
  -5   0  10  484.67   18.29
   0  -5  10  520.19   18.20
  -1  -5 -10   16.04    1.18
  -5   1 -10   13.05    1.29
   1   5 -10   14.93    1.34
  -5   1 -10   15.58    1.09
  -5   1  10   13.42    1.16
  -5   1  10   12.56    1.05
   1   5  10   11.31    0.74
  -1  -5  10   14.51    1.34
  -1  -5  10   13.49    1.08
   5  -1  10   12.60    1.04
   2   5 -10  204.28    7.97
  -5   2 -10  202.36    7.64
  -5   2 -10  208.73    7.91
  -2  -5 -10  213.87    7.77
  -2  -5  10  250.21    8.80
  -5   2  10  253.42    8.76
  -5   2  10  243.64    8.92
  -2  -5  10  224.67    9.08
   5  -2  10  226.67    8.78
   2   5  10  240.24    8.49
  -5   3 -10   51.80    2.33
   5  -3 -10   50.14    2.13
  -5   3 -10   50.85    2.53
  -3  -5 -10   51.72    2.49
  -5   3  10   47.29    2.39
  -3  -5  10   46.22    2.59
  -3  -5  10   49.03    2.24
  -5   3  10   49.41    2.08
   5  -3  10   51.73    2.30
  -5   4 -10  179.78    6.60
  -4  -5 -10  186.42    6.83
  -5   4 -10  161.73    6.70
   5  -4 -10  169.49    6.27
  -4  -5  10  176.37    6.74
   5  -4  10  170.63    6.78
  -4  -5  10  192.94    7.20
  -5   4  10  179.48    6.87
  -5   5 -10  119.61    4.91
  -5   5 -10  119.05    4.76
  -5  -5 -10  122.33    5.04
  -5  -5  10  126.81    4.96
   5  -5  10  122.84    4.97
  -5  -5  10  122.62    5.36
  -5   5  10  131.94    5.08
  -6  -5 -10   72.39    3.58
  -5   6 -10   75.63    3.37
  -5   6 -10   72.17    3.23
  -6  -5  10   80.30    3.43
  -6  -5  10   77.07    3.86
   5  -6  10   79.57    3.44
  -5   6  10   76.68    3.48
  -4   6 -10   45.66    2.22
  -6  -4 -10   49.04    2.67
  -4   6 -10   44.29    2.34
  -6  -4  10   42.49    2.70
  -4   6  10   50.35    2.38
  -6  -4  10   48.96    2.42
   4  -6  10   49.39    2.38
  -3   6 -10  148.30    5.61
  -6  -3 -10  137.28    5.89
  -3   6 -10  144.89    5.75
  -6  -3 -10  151.55    5.35
  -3   6  10  139.31    5.29
  -6  -3  10  137.44    5.38
  -6  -3  10  139.40    5.64
   3  -6  10  130.20    5.28
   2  -6 -10   40.39    1.58
  -6  -2 -10   38.92    1.74
  -2   6 -10   36.91    1.88
  -2   6 -10   36.71    2.11
  -6  -2  10   34.21    1.96
  -2   6  10   35.95    1.76
   2  -6  10   33.61    1.83
  -6  -2  10   32.80    2.10
   1  -6 -10   57.80    2.30
  -6  -1 -10   55.52    2.85
  -1   6 -10   55.29    2.69
  -6  -1 -10   55.80    2.38
   1  -6  10   62.19    2.63
   1  -6  10   61.20    2.87
  -1   6  10   61.05    2.50
  -6  -1  10   59.02    2.77
  -6  -1  10   55.10    2.81
   0  -6 -10    0.75    0.52
  -6   0 -10    2.10    0.85
   0   6 -10    0.85    0.72
  -6   0 -10    1.54    0.57
   0  -6  10    0.73    0.58
   0   6  10    1.34    0.45
  -6   0  10    0.50    0.70
   0  -6  10    0.90    0.78
  -6   0  10    0.73    0.72
   1   6 -10   58.91    2.84
  -6   1 -10   54.04    2.82
  -6   1 -10   53.81    2.47
  -1  -6 -10   60.67    2.54
  -1  -6  10   56.96    2.80
   6  -1  10   55.04    2.40
  -6   1  10   51.85    2.46
   1   6  10   53.17    2.12
  -6   1  10   55.17    2.59
  -1  -6  10   55.30    2.42
  -2  -6 -10   35.47    1.94
  -6   2 -10   35.64    1.85
   2   6 -10   36.31    2.20
  -6   2 -10   38.09    2.19
  -2  -6  10   44.22    2.41
  -2  -6  10   38.35    1.93
  -6   2  10   36.99    1.88
  -6   2  10   41.15    2.14
   6  -2  10   37.96    1.95
  -3  -6 -10  136.67    5.32
  -6   3 -10  124.66    5.36
  -6   3 -10  136.78    5.18
  -6   3  10  148.38    5.66
  -3  -6  10  153.55    5.81
   6  -3  10  158.53    5.88
  -6   3  10  149.83    5.98
  -3  -6  10  152.38    6.21
  -6   4 -10   50.47    2.39
  -4  -6 -10   49.65    2.60
   6  -4 -10   47.13    2.00
  -6   4 -10   48.53    2.56
  -6   4  10   49.95    2.55
  -6   4  10   48.17    2.02
  -4  -6  10   46.50    2.32
  -4  -6  10   50.70    2.83
   6  -4  10   49.71    2.41
  -6   5 -10   74.41    3.50
  -6   5 -10   83.24    3.44
  -5  -6 -10   76.10    3.65
   6  -5  10   79.47    3.37
  -5  -6  10   71.40    3.23
  -6   5  10   79.40    3.45
  -5  -6  10   69.21    3.67
  -6   6 -10   48.51    2.57
  -6   6 -10   49.79    2.52
  -6  -6 -10   45.63    2.81
   6  -6  10   47.52    2.51
  -6  -6  10   47.62    2.42
  -6   6  10   48.94    2.62
  -6  -6  10   45.50    2.94
  -7  -6 -10   20.99    1.99
  -6   7 -10   21.66    1.77
  -6   7 -10   17.48    1.53
  -7  -6  10   25.00    1.84
   6  -7  10   22.40    1.88
  -6   7  10   24.96    1.96
  -7  -6  10   25.60    2.31
  -5   7 -10   88.10    3.75
  -5   7 -10   83.93    3.80
  -7  -5 -10   88.24    4.19
   5  -7  10   94.01    3.97
  -7  -5  10   97.37    3.98
  -5   7  10   92.40    3.96
  -7  -5  10   83.56    4.30
  -4   7 -10   32.02    1.91
  -7  -4 -10   28.77    2.20
  -4   7 -10   30.05    1.84
  -4   7  10   26.44    1.76
   4  -7  10   23.70    1.73
  -7  -4  10   24.58    1.79
  -7  -4  10   23.91    2.16
  -3   7 -10   25.42    1.71
  -3   7 -10   22.09    1.53
  -7  -3 -10   15.99    1.70
  -7  -3 -10   24.41    1.28
  -3   7  10   16.13    1.24
  -7  -3  10   15.37    1.64
   3  -7  10   13.23    1.21
  -7  -3  10   15.38    1.40
  -2   7 -10   38.76    1.97
  -7  -2 -10   40.18    1.85
  -2   7 -10   36.64    2.17
  -7  -2 -10   40.97    2.46
  -2   7  10   35.71    1.83
  -7  -2  10   34.81    2.23
   2  -7  10   34.50    1.92
  -7  -2  10   34.28    2.07
  -7  -1 -10    1.79    0.64
  -7  -1 -10    1.02    0.90
   1  -7 -10    2.91    0.52
  -1   7 -10    2.19    0.80
   1  -7  10    2.24    0.71
   1  -7  10    2.37    0.87
  -1   7  10    2.51    0.61
  -7  -1  10    3.07    0.88
  -7  -1  10    4.00    0.95
   0  -7 -10  112.52    4.14
  -7   0 -10  110.56    4.18
  -7   0 -10   96.00    4.51
   0   7 -10   99.88    4.45
  -7   0  10  103.42    4.26
  -7   0  10   98.56    4.21
   0  -7  10  102.12    4.08
   0  -7  10   98.60    4.34
   0   7  10  105.10    3.90
  -7   1 -10    1.31    0.94
  -1  -7 -10    1.61    0.67
  -7   1 -10    2.62    0.74
   1   7 -10    0.98    0.86
  -1  -7  10    3.73    0.74
  -7   1  10    2.02    0.78
   1   7  10    2.72    0.44
  -7   1  10    1.53    0.90
  -1  -7  10    3.34    0.95
  -7   2 -10   35.69    2.03
  -7   2 -10   40.94    2.35
  -2  -7 -10   37.81    2.09
   2   7 -10   38.45    2.35
  -2  -7  10   38.08    2.38
  -2  -7  10   43.76    2.06
  -7   2  10   38.15    2.29
  -7   2  10   40.27    2.03
  -3  -7 -10   17.11    1.57
  -7   3 -10   14.72    1.50
  -7   3 -10   15.69    1.32
  -3  -7  10   23.23    2.05
  -7   3  10   23.95    1.41
  -3  -7  10   23.14    1.57
  -7   3  10   23.01    1.85
  -7   4 -10   24.64    1.76
  -4  -7 -10   23.81    1.88
  -7   4 -10   25.46    1.89
  -7   4  10   36.16    2.23
  -4  -7  10   31.26    1.88
  -4  -7  10   34.07    2.47
  -5  -7 -10   97.08    4.40
  -7   5 -10   97.78    4.17
  -7   5 -10   97.50    4.28
  -5  -7  10   95.36    3.78
  -7   5  10   89.58    4.03
  -5  -7  10   82.53    4.24
  -6  -7 -10   21.72    2.05
  -7   6 -10   24.34    1.89
  -7   6 -10   20.50    1.85
  -6  -7  10   21.88    1.69
  -7   6  10   20.24    1.73
  -6  -7  10   20.90    2.10
  -7   7 -10  135.72    5.59
  -7   7 -10  135.62    5.61
  -7  -7 -10  136.46    6.01
  -7   7  10  140.78    5.78
  -7  -7  10  141.95    6.25
  -7  -7  10  137.10    5.59
  -8  -7 -10    0.79    1.38
  -7   8 -10    0.47    1.03
  -7   8 -10    1.03    1.00
  -8  -7  10    2.28    0.99
  -7   8  10    1.24    1.05
  -8  -7  10   -0.37    1.32
  -8  -6 -10  153.18    6.46
  -6   8 -10  141.86    5.93
  -6   8 -10  147.72    5.96
  -8  -6  10  154.89    6.49
  -6   8  10  141.61    5.90
  -8  -6  10  145.60    5.88
   6  -8  10  143.18    5.93
  -8  -5 -10    1.83    1.27
  -5   8 -10    1.07    0.87
  -5   8 -10    2.16    0.93
   5  -8  10    4.89    1.05
  -5   8  10    2.41    0.94
  -8  -5  10    5.74    1.09
  -8  -5  10    1.89    1.38
  -4   8 -10  153.13    5.95
  -4   8 -10  153.59    5.87
  -8  -4 -10  137.28    6.23
   4  -8  10  158.53    6.17
  -8  -4  10  163.83    6.29
  -8  -4  10  139.72    6.49
  -4   8  10  163.86    6.15
  -3   8 -10   58.84    2.72
  -8  -3 -10   59.05    3.18
  -3   8 -10   57.65    2.82
  -8  -3 -10   56.65    2.48
  -8  -3  10   70.76    3.60
  -8  -3  10   70.92    3.33
   3  -8  10   69.58    3.19
  -3   8  10   71.03    3.11
  -2   8 -10   17.53    1.61
  -8  -2 -10   23.45    2.02
  -2   8 -10   16.55    1.42
  -8  -2 -10   17.78    1.33
  -8  -2  10   23.14    1.92
  -2   8  10   22.56    1.51
  -8  -2  10   24.86    2.02
   2  -8  10   22.24    1.66
  -8  -1 -10   40.80    2.14
  -1   8 -10   43.35    2.42
  -8  -1 -10   42.16    2.61
  -1   8 -10   45.23    2.19
   1  -8 -10   45.72    1.95
   1  -8  10   50.48    2.43
  -8  -1  10   49.99    2.72
  -8  -1  10   45.61    2.60
   1  -8  10   48.80    2.61
  -1   8  10   48.50    2.23
  -8   0 -10    0.26    0.96
  -8   0 -10    1.65    0.75
   0   8 -10    0.01    0.81
   0  -8 -10    0.24    0.61
   0   8  10    0.34    0.52
   0  -8  10    0.47    0.90
  -8   0  10   -0.68    0.84
   0  -8  10   -0.29    0.66
  -8   0  10    0.15    0.83
   1   8 -10   51.61    2.79
  -8   1 -10   47.35    2.44
  -8   1 -10   44.15    2.74
  -1  -8 -10   54.10    2.42
  -1  -8  10   42.00    2.58
  -8   1  10   45.33    2.38
  -1  -8  10   47.67    2.27
  -8   1  10   42.95    2.54
   1   8  10   44.93    2.00
   2   8 -10   21.37    2.02
  -8   2 -10   25.41    1.77
  -2  -8 -10   25.62    1.76
  -8   2 -10   24.04    2.05
  -2  -8  10   19.20    1.50
  -8   2  10   20.57    1.72
  -8   2  10   19.89    1.51
  -2  -8  10   17.81    1.74
  -8   3 -10   72.65    3.49
  -8   3 -10   66.69    3.21
  -3  -8 -10   71.36    3.36
  -3  -8  10   54.55    3.20
  -8   3  10   58.32    2.63
  -8   3  10   63.26    3.13
  -3  -8  10   61.45    2.75
  -4  -8 -10  161.89    6.70
  -8   4 -10  170.76    6.55
  -8   4 -10  164.21    6.68
  -4  -8  10  157.08    6.29
  -8   4  10  165.06    6.63
  -4  -8  10  170.99    6.91
  -8   5 -10    3.37    1.14
  -5  -8 -10    4.23    1.29
  -8   5 -10    3.21    1.04
  -5  -8  10   -0.39    1.19
  -5  -8  10    1.49    0.82
  -8   5  10   -0.19    1.04
  -8   6 -10  149.46    6.10
  -8   6 -10  148.22    6.12
  -6  -8 -10  150.89    6.43
  -8   6  10  156.25    6.16
  -6  -8  10  148.15    5.84
  -6  -8  10  138.54    6.39
  -8   7 -10    0.11    1.05
  -7  -8 -10    1.43    1.35
  -8   7 -10    0.37    1.04
  -8   7  10    0.23    1.12
  -7  -8  10    0.80    1.35
  -7  -8  10   -0.10    0.86
  -8   8 -10  153.30    6.50
  -8  -8 -10  164.25    7.12
  -8   8 -10  162.23    6.59
  -8  -8  10  136.79    6.58
  -8   8  10  149.43    6.16
  -8  -8  10  151.31    5.92
  -8   9 -10    3.97    1.33
  -9  -8 -10    3.09    1.76
  -9  -8  10    4.55    1.87
  -8   9  10    2.86    1.27
  -9  -8  10    2.81    1.55
  -7   9 -10  156.41    6.62
  -9  -7 -10  168.76    7.27
  -9  -7  10  167.27    7.10
  -9  -7  10  150.93    6.29
  -7   9  10  152.64    6.39
  -6   9 -10   23.66    1.90
  -9  -6 -10   26.19    2.57
  -6   9 -10   17.67    1.71
  -9  -6  10   19.16    1.79
  -9  -6  10   23.16    2.39
  -6   9  10   22.94    1.82
  -5   9 -10   87.20    3.92
  -9  -5 -10   90.47    4.57
  -5   9 -10   85.37    3.91
   5  -9  10   94.64    4.18
  -9  -5  10   93.44    4.71
  -5   9  10   92.81    4.12
  -9  -5  10   93.58    4.22
  -9  -4 -10    4.03    1.47
  -4   9 -10    3.16    1.00
  -4   9 -10    2.90    0.96
  -9  -4  10    8.83    1.34
  -9  -4  10    8.19    1.61
  -4   9  10    6.10    1.03
   4  -9  10    4.36    1.07
  -3   9 -10   93.21    4.05
  -3   9 -10   92.65    4.16
  -9  -3 -10  102.87    4.66
  -9  -3  10   96.83    4.56
  -9  -3  10   93.62    4.32
  -3   9  10   97.56    4.05
   3  -9  10   99.04    4.15
  -2   9 -10   16.41    1.36
  -2   9 -10   15.56    1.49
  -9  -2 -10   14.46    1.82
  -9  -2 -10   12.78    1.20
   2  -9  10   18.87    1.55
  -9  -2  10   23.76    1.93
  -9  -2  10   21.68    1.97
  -2   9  10   20.83    1.53
  -9  -1 -10   11.03    1.60
  -1   9 -10   10.07    1.11
  -9  -1 -10    9.33    1.13
  -1   9 -10    8.20    1.27
  -9  -1  10   10.10    1.43
   1  -9  10   12.77    1.24
  -1   9  10   13.18    1.07
   1  -9  10    9.64    1.35
  -9  -1  10   10.46    1.43
  -9   0 -10   15.64    1.80
   0   9 -10   16.59    1.65
  -9   0 -10   17.84    1.45
   0   9 -10   18.79    1.50
   0  -9 -10   19.57    1.70
   0   9  10   17.19    1.72
  -9   0  10   17.39    1.65
  -9   0  10   18.14    1.64
   0  -9  10   16.24    1.39
   0  -9  10   16.34    1.65
  -9   1 -10   12.38    1.65
   1   9 -10   11.06    1.46
  -1  -9 -10   14.16    1.32
  -9   1 -10   11.62    1.26
  -1  -9  10   10.79    1.15
  -9   1  10    8.30    1.21
  -1  -9  10    9.88    1.41
  -9   1  10    9.84    1.40
  -9   2 -10   21.97    1.84
   2   9 -10   23.14    2.11
  -9   2 -10   23.82    2.16
  -2  -9 -10   21.87    1.80
  -9   2  10   15.34    1.38
  -9   2  10   14.25    1.62
  -2  -9  10   15.62    1.72
  -2  -9  10   15.32    1.33
  -9   3 -10  103.18    4.50
  -3  -9 -10  102.61    4.56
  -9   3 -10  106.43    4.76
  -3  -9  10   99.88    4.20
  -3  -9  10  106.12    4.77
  -9   3  10   99.42    4.60
  -9   4 -10    9.00    1.46
  -9   4 -10    5.04    1.18
  -4  -9 -10    6.87    1.33
  -4  -9  10    4.87    0.98
  -4  -9  10    5.29    1.46
  -9   4  10    5.11    1.33
  -5  -9 -10  103.98    4.76
  -9   5 -10  105.53    4.62
  -9   5 -10   92.60    4.47
  -5  -9  10   83.81    4.42
  -9   5  10   89.13    4.22
  -5  -9  10   86.87    3.75
  -6  -9 -10   25.29    2.37
  -9   6 -10   25.83    2.10
  -9   6 -10   23.60    2.18
  -6  -9  10   23.24    1.85
  -6  -9  10   21.35    2.36
  -9   6  10   21.69    2.01
  -7  -9 -10  161.29    7.10
  -9   7 -10  165.20    6.76
  -9   7 -10  161.31    6.63
  -7  -9  10  146.72    5.93
  -7  -9  10  147.98    6.73
  -9   7  10  149.39    6.29
  -8  -9 -10    2.27    1.71
  -9   8 -10    2.39    1.40
  -8  -9  10    2.36    1.75
  -9   8  10    2.30    1.32
  -9  -9 -10  161.48    7.61
  -9   9 -10  168.10    6.98
  -9   9  10  159.51    6.88
  -9  -9  10  168.92    7.60
  -9  10 -10   -0.19    1.40
 -10  -9 -10    1.28    2.00
 -10  -9  10   -2.64    1.72
  -9  10  10    1.48    1.35
  -8  10 -10  134.01    5.96
 -10  -8 -10  141.22    6.76
 -10  -8  10  110.76    5.89
  -8  10  10  122.80    5.28
 -10  -7 -10    3.36    1.95
  -7  10 -10    5.11    1.34
 -10  -7  10    3.38    1.25
 -10  -7  10    3.52    1.85
  -7  10  10    4.30    1.27
 -10  -6 -10   52.57    3.69
  -6  10 -10   44.45    2.83
  -6  10  10   48.18    2.84
 -10  -6  10   48.89    3.62
 -10  -6  10   49.02    2.92
 -10  -5 -10   14.20    2.15
  -5  10 -10   15.61    1.57
  -5  10 -10   14.65    1.50
  -5  10  10   14.01    1.45
 -10  -5  10   12.81    2.02
   5 -10  10   11.30    1.46
 -10  -5  10   13.33    1.63
  -4  10 -10   50.69    2.84
  -4  10 -10   50.64    2.77
 -10  -4 -10   60.00    3.59
  -4  10  10   68.37    3.16
 -10  -4  10   60.33    3.43
 -10  -4  10   67.31    3.83
   4 -10  10   63.47    3.26
  -3  10 -10   12.12    1.30
 -10  -3 -10   12.27    1.85
  -3  10 -10   11.54    1.39
   3 -10  10   10.59    1.29
 -10  -3  10    8.42    1.42
 -10  -3  10   11.71    1.79
  -3  10  10   10.48    1.15
 -10  -2 -10    4.19    1.03
 -10  -2 -10    3.60    1.43
  -2  10 -10    4.93    1.00
  -2  10 -10    4.39    1.09
   2 -10  10    0.31    0.87
 -10  -2  10    0.07    1.18
  -2  10  10    0.28    0.74
 -10  -2  10   -0.11    1.06
  -1  10 -10    2.59    1.07
  -1  10 -10    3.72    0.92
 -10  -1 -10    2.32    0.94
 -10  -1 -10    3.03    1.38
   1 -10  10    2.22    1.08
 -10  -1  10    3.24    1.23
 -10  -1  10    2.99    1.21
   1 -10  10    3.94    1.00
 -10   0 -10    4.07    1.43
   0  10 -10    1.22    0.83
 -10   0 -10    0.32    0.90
   0  10 -10    0.57    1.01
 -10   0  10    0.77    1.09
 -10   0  10    0.99    1.14
   0 -10  10    0.21    0.84
   0 -10  10    1.19    1.04
   1  10 -10    4.32    0.90
   1  10 -10    3.14    1.24
 -10   1 -10    3.74    1.07
 -10   1 -10    6.17    1.45
  -1 -10  10    3.89    0.95
 -10   1  10    1.82    1.24
  -1 -10  10    3.80    1.26
 -10   1  10    3.33    1.12
   2  10 -10   -0.56    1.09
 -10   2 -10    2.11    1.08
  -2 -10 -10    1.20    1.00
 -10   2 -10    2.22    1.30
 -10   2  10    4.96    1.39
 -10   2  10    4.92    1.12
  -2 -10  10    6.45    1.42
  -2 -10  10    2.92    0.95
  -3 -10 -10   14.15    1.61
 -10   3 -10    9.78    1.43
 -10   3 -10   11.91    1.70
 -10   3  10    8.54    1.60
  -3 -10  10   13.02    1.29
  -3 -10  10   12.22    1.74
 -10   4 -10   72.03    3.60
  -4 -10 -10   69.81    3.64
 -10   4 -10   62.18    3.52
 -10   4  10   57.38    3.31
  -4 -10  10   52.01    3.37
  -4 -10  10   52.57    2.72
  -5 -10 -10   14.64    1.93
 -10   5 -10   13.00    1.76
 -10   5 -10   14.40    1.73
  -5 -10  10   14.82    1.41
 -10   5  10   12.77    1.79
  -5 -10  10   13.01    2.02
 -10   6 -10   52.30    3.20
 -10   6 -10   51.91    3.12
  -6 -10 -10   52.57    3.53
 -10   6  10   48.23    3.15
  -6 -10  10   41.92    2.52
  -6 -10  10   48.30    3.51
 -10   7 -10    2.46    1.45
  -7 -10 -10    0.97    1.60
 -10   7  10    3.77    1.53
  -7 -10  10    3.15    1.81
  -8 -10 -10  131.85    6.36
 -10   8 -10  124.42    5.77
  -8 -10  10  134.51    6.55
 -10   8  10  132.01    5.97
 -10   9 -10   -0.42    1.45
  -9 -10 -10    0.91    1.91
 -10   9  10   -0.77    1.38
  -9 -10  10   -0.71    1.80
 -10 -10 -10  133.49    6.83
 -10  10 -10  128.64    6.05
 -10 -10  10  120.16    6.46
 -10  10  10  121.14    5.64
 -11 -10 -10    5.80    2.61
 -10  11 -10    2.90    1.73
 -10  11  10    5.92    1.74
 -11 -10  10    5.38    2.37
 -11  -9 -10   92.02    5.61
  -9  11 -10   78.11    4.41
  -9  11  10   71.84    4.01
 -11  -9  10   67.28    4.74
 -11  -8 -10    0.74    1.99
  -8  11 -10    1.16    1.33
 -11  -8  10   -1.77    1.78
  -8  11  10   -1.10    1.21
  -7  11 -10   98.43    4.55
 -11  -7 -10   89.23    5.32
 -11  -7  10   84.95    4.96
  -7  11  10   76.16    3.98
 -11  -6 -10    3.30    1.96
  -6  11 -10    2.36    1.27
 -11  -6  10    2.78    1.80
 -11  -6  10    3.26    1.31
  -6  11  10    2.58    1.20
 -11  -5 -10   41.54    3.50
  -5  11 -10   44.06    2.70
 -11  -5  10   45.27    2.95
  -5  11  10   41.21    2.66
 -11  -5  10   52.38    3.63
  -4  11 -10   10.56    1.39
 -11  -4 -10    9.34    1.94
   4 -11  10    9.89    1.44
 -11  -4  10   13.16    1.76
 -11  -4  10    9.12    1.87
  -4  11  10    8.26    1.24
  -3  11 -10   27.99    2.12
 -11  -3 -10   31.88    2.85
  -3  11 -10   28.49    2.09
 -11  -3  10   29.49    2.48
  -3  11  10   27.55    1.99
 -11  -3  10   30.15    2.79
   3 -11  10   30.38    2.21
 -11  -2 -10    2.57    1.51
  -2  11 -10    3.20    1.12
  -2  11 -10    2.96    0.96
 -11  -2  10    2.25    1.38
   2 -11  10    2.59    1.07
 -11  -2  10    2.85    1.30
 -11  -1 -10    1.32    1.03
  -1  11 -10    1.22    0.86
  -1  11 -10    1.60    1.10
 -11  -1 -10    3.06    1.51
 -11  -1  10    1.53    1.26
   1 -11  10    0.81    1.08
 -11  -1  10    1.21    1.24
   1 -11  10   -0.39    0.92
   0  11 -10    4.38    1.25
 -11   0 -10    5.48    1.62
   0  11 -10    2.77    0.95
 -11   0 -10    4.29    1.15
 -11   0  10    2.85    1.34
   0 -11  10    5.14    1.09
   0 -11  10    4.04    1.28
 -11   0  10    5.91    1.36
   1  11 -10    1.65    1.25
   1  11 -10    0.03    0.80
 -11   1 -10   -1.53    0.97
 -11   1 -10    1.99    1.42
 -11   1  10    0.10    1.28
  -1 -11  10   -0.40    0.87
  -1 -11  10    1.70    1.24
 -11   1  10    2.07    1.16
 -11   2 -10    1.50    1.18
 -11   2 -10    2.34    1.37
   2  11 -10    2.78    1.36
   2  11 -10    3.36    0.92
 -11   2  10    5.70    1.54
  -2 -11  10    2.91    1.36
  -2 -11  10    2.14    0.95
 -11   3 -10   29.71    2.53
   3  11 -10   34.12    2.78
 -11   3 -10   31.46    2.77
  -3 -11 -10   33.88    2.47
 -11   3  10   31.18    2.59
  -3 -11  10   30.96    2.12
  -3 -11  10   29.11    2.59
 -11   4 -10    8.45    1.61
  -4 -11 -10    9.96    1.75
 -11   4 -10   13.18    1.85
  -4 -11  10   10.61    1.30
  -4 -11  10   10.26    1.90
 -11   4  10   10.15    1.78
 -11   5 -10   46.09    3.11
 -11   5 -10   47.15    3.10
  -5 -11 -10   44.96    3.14
 -11   5  10   45.07    3.29
  -5 -11  10   46.46    3.48
 -11   6 -10    3.91    2.08
 -11   6 -10    3.77    1.54
  -6 -11 -10    4.95    1.75
  -6 -11  10    3.30    1.74
 -11   6  10    1.60    1.51
 -11   7 -10   89.43    4.63
  -7 -11 -10   82.52    4.84
  -7 -11  10   91.56    5.26
 -11   7  10  100.47    5.00
  -8 -11 -10   -2.03    1.79
 -11   8 -10   -1.85    1.52
  -8 -11  10   -1.15    1.81
 -11   8  10    1.03    1.55
 -11   9 -10   77.77    4.43
  -9 -11 -10   73.97    4.98
  -9 -11  10   83.25    5.27
 -11   9  10   79.86    4.53
 -10 -11 -10    7.69    2.52
 -11  10 -10    6.25    1.95
 -11  10  10    6.37    1.88
 -10 -11  10    2.68    2.40
 -11 -11 -10   50.39    4.85
 -11  11 -10   61.14    4.01
 -11 -11  10   60.27    5.02
 -11  11  10   54.77    3.98
 -12 -10 -10   76.20    5.66
 -10  12 -10   73.62    4.48
 -12 -10  10   79.83    5.84
 -10  12  10   83.52    4.67
 -12  -9 -10    0.88    2.40
  -9  12 -10    4.48    1.65
  -9  12  10   -1.51    1.41
 -12  -9  10    1.00    2.35
  -8  12 -10   96.35    4.91
 -12  -8 -10  106.42    6.19
 -12  -8  10   93.76    5.57
  -8  12  10   85.90    4.49
 -12  -7 -10    6.37    2.28
  -7  12 -10    0.61    1.29
 -12  -7  10    3.50    2.14
  -7  12  10    1.16    1.32
  -6  12 -10   44.70    3.00
 -12  -6 -10   50.26    4.27
 -12  -6  10   44.41    3.91
  -6  12  10   49.23    2.99
  -5  12 -10    4.13    1.27
 -12  -5 -10    7.66    2.22
  -5  12  10    2.01    1.15
 -12  -5  10    3.43    1.46
 -12  -5  10    3.64    1.88
 -12  -4 -10   87.20    5.07
  -4  12 -10   85.17    4.07
 -12  -4  10   84.57    4.59
 -12  -4  10   73.38    4.11
 -12  -3 -10   25.42    2.79
  -3  12 -10   19.47    1.80
 -12  -3  10   20.34    2.35
 -12  -3  10   19.88    2.12
   3 -12  10   21.84    1.90
  -2  12 -10   12.77    1.47
  -2  12 -10   13.57    1.70
 -12  -2 -10   16.42    2.38
 -12  -2  10   15.05    2.02
   2 -12  10   13.32    1.56
 -12  -2  10   12.86    1.85
  -1  12 -10   17.56    1.84
 -12  -1 -10   19.28    2.35
  -1  12 -10   14.52    1.54
 -12  -1  10   15.77    2.03
   1 -12  10   18.58    1.69
   1 -12  10   15.59    1.83
 -12  -1  10   15.77    2.01
   0  12 -10    0.36    0.91
 -12   0 -10    2.66    1.22
   0  12 -10   -0.62    1.16
 -12   0 -10    1.96    1.58
   0 -12  10    0.49    0.99
   0 -12  10    0.92    1.27
 -12   0  10    1.02    1.31
 -12   0  10    1.08    1.37
   1  12 -10   16.63    1.99
   1  12 -10   19.24    1.61
 -12   1 -10   17.79    2.26
 -12   1 -10   15.54    1.83
  -1 -12  10   17.48    1.61
  -1 -12  10   15.93    1.94
   2  12 -10   15.45    1.50
 -12   2 -10   13.19    2.06
 -12   2 -10   11.34    1.72
   2  12 -10   12.73    1.91
  -2 -12  10   13.72    1.87
  -2 -12  10   12.94    1.45
 -12   2  10   12.66    1.91
   3  12 -10   21.48    2.39
 -12   3 -10   20.97    2.08
   3  12 -10   18.97    1.68
 -12   3 -10   22.65    2.34
  -3 -12  10   19.04    2.28
 -12   3  10   20.50    2.31
  -3 -12  10   20.43    1.71
 -12   4 -10   87.22    4.44
 -12   4 -10   83.43    4.39
  -4 -12  10   85.92    4.66
 -12   4  10   86.72    4.68
 -12   5 -10    2.64    1.50
  -5 -12 -10    3.46    1.62
 -12   5 -10    3.74    1.60
  -5 -12  10    3.64    1.85
 -12   5  10    2.43    1.65
  -6 -12 -10   52.23    3.82
 -12   6 -10   48.69    3.53
  -6 -12  10   54.31    4.01
 -12   6  10   50.07    3.83
 -12   7 -10   -2.15    1.58
  -7 -12 -10    1.37    1.85
  -7 -12  10    0.64    1.95
 -12   7  10    2.49    1.71
 -12   8 -10   98.95    5.20
  -8 -12 -10   89.58    5.58
 -12   8  10   92.98    5.14
  -8 -12  10  100.39    5.68
  -9 -12 -10    4.71    2.36
 -12   9 -10    2.20    1.86
 -12   9  10   -0.22    1.74
  -9 -12  10    5.34    2.38
 -10 -12 -10   87.49    5.71
 -12  10 -10   81.79    5.08
 -10 -12  10   89.71    5.80
 -12  10  10   78.01    4.85
  -9  13 -10   84.09    5.03
  -9  13  10  100.54    5.06
  -8  13 -10    0.67    1.56
 -13  -8 -10    3.66    2.53
  -8  13  10   -0.55    1.40
 -13  -8  10    3.97    2.41
 -13  -7 -10   91.70    6.08
  -7  13 -10   92.14    4.71
 -13  -7  10   81.55    5.34
  -7  13  10   82.30    4.26
 -13  -6 -10   10.67    2.65
  -6  13 -10    7.60    1.56
 -13  -6  10    5.75    2.23
  -6  13  10    2.66    1.67
  -5  13 -10   30.31    2.43
 -13  -5 -10   35.72    3.55
 -13  -5  10   29.79    3.02
 -13  -4 -10   10.61    2.48
  -4  13 -10    8.46    1.55
 -13  -4  10    7.33    1.70
 -13  -4  10    8.73    2.20
  -3  13 -10   12.87    1.61
 -13  -3 -10   15.71    2.62
 -13  -3  10   10.37    1.87
   3 -13  10   12.00    1.65
 -13  -3  10   11.75    2.18
  -2  13 -10    8.54    1.39
 -13  -2 -10   13.23    2.38
 -13  -2  10   18.92    2.27
 -13  -2  10   13.99    2.01
   2 -13  10   14.91    1.73
 -13  -1 -10    1.19    1.78
  -1  13 -10    1.25    1.06
 -13  -1  10    2.20    1.57
 -13  -1  10    0.58    1.48
   1 -13  10    0.78    1.15
   0  13 -10   48.36    2.72
 -13   0 -10   47.02    3.62
   0  13 -10   41.04    2.95
   0 -13  10   45.41    2.78
   0 -13  10   45.07    3.09
 -13   0  10   44.70    3.29
 -13   0  10   47.28    3.49
   1  13 -10   -0.36    0.99
 -13   1 -10    2.02    1.77
 -13   1 -10    0.19    1.31
   1  13 -10    0.38    1.38
  -1 -13  10    2.44    1.48
 -13   1  10    4.05    1.71
  -1 -13  10    1.27    1.15
 -13   2 -10   11.73    1.89
   2  13 -10   13.84    2.04
 -13   2 -10   14.95    2.22
 -13   2  10    9.27    1.96
  -2 -13  10   10.10    1.87
   3  13 -10   11.04    2.03
 -13   3 -10   11.62    1.94
 -13   3 -10   14.15    2.13
  -3 -13  10   11.54    2.10
 -13   3  10   11.96    2.07
 -13   4 -10   12.03    2.08
   4  13 -10    6.76    1.96
 -13   4 -10   10.24    1.94
  -4 -13  10    9.07    2.11
 -13   4  10    7.83    2.03
 -13   5 -10   28.65    2.64
  -5 -13  10   30.84    3.11
 -13   5  10   37.76    3.15
 -13   6 -10    6.01    1.91
  -6 -13  10    6.30    2.23
 -13   6  10    9.37    2.19
  -7 -13 -10   93.51    5.47
 -13   7 -10   94.23    5.23
 -13   7  10   98.08    5.29
  -7 -13  10   91.00    5.68
  -8 -13 -10    1.62    2.15
 -13   8 -10    0.19    1.83
  -8 -13  10   -0.13    2.15
 -13   8  10    0.30    1.91
  -9 -13 -10   90.76    5.87
  -9 -13  10   86.68    5.68
  -7  14 -10    3.07    1.63
 -14  -7 -10    2.70    2.84
 -14  -7  10   -0.64    2.24
 -14  -6 -10   35.88    3.78
  -6  14 -10   30.54    2.54
 -14  -6  10   40.34    3.77
 -14  -5 -10   15.07    3.01
  -5  14 -10   11.75    1.81
 -14  -5  10   12.24    2.56
  -4  14 -10   27.19    2.35
 -14  -4 -10   29.87    3.41
 -14  -4  10   28.12    3.07
  -3  14 -10   17.10    1.89
 -14  -3 -10   16.16    2.77
 -14  -3  10   12.49    2.27
 -14  -3  10   15.91    2.16
  -2  14 -10    7.04    1.43
 -14  -2 -10   11.35    2.49
 -14  -2  10   10.41    1.96
   2 -14  10    7.58    1.56
 -14  -2  10    7.64    2.01
 -14  -1 -10   13.00    2.39
  -1  14 -10   10.71    1.57
 -14  -1  10   16.52    2.25
 -14  -1  10   13.87    2.17
   1 -14  10   11.15    1.66
   0  14 -10    6.63    1.92
 -14   0 -10    8.47    2.20
 -14   0  10    7.36    1.95
   0 -14  10    6.44    1.52
 -14   1 -10   13.00    2.37
 -14   1  10   10.35    2.12
  -1 -14  10   15.01    3.16
   2  14 -10    9.44    1.98
 -14   2 -10   12.57    2.36
 -14   2 -10    7.06    1.87
 -14   2  10    6.75    2.03
  -2 -14  10    7.61    1.91
   3  14 -10   18.76    2.41
 -14   3 -10   17.11    2.27
 -14   3 -10   14.81    2.38
  -3 -14  10   18.18    2.43
 -14   3  10   24.06    2.74
   4  14 -10   29.58    3.02
 -14   4 -10   30.73    2.84
 -14   4  10   24.49    2.86
  -4 -14  10   27.18    2.86
 -14   5 -10   13.30    2.25
   5  14 -10   11.06    2.34
 -14   5  10   18.62    2.58
  -5 -14  10   11.84    2.48
 -14   6 -10   42.96    3.54
 -14   6  10   40.88    3.52
  -6 -14  10   32.36    3.33
 -14   7 -10   -0.10    1.96
 -14   7  10    2.51    2.29
  -7 -14  10   -1.61    2.06
  -5  15 -10   25.82    2.48
 -15  -5 -10   37.86    5.03
 -15  -5  10   23.88    3.14
 -15  -4 -10   14.76    3.16
  -4  15 -10   11.61    1.85
 -15  -4  10   12.26    2.55
 -15  -3 -10   22.92    3.28
  -3  15 -10   25.60    2.28
 -15  -3  10   18.85    2.68
 -15  -3  10   23.59    2.75
 -15  -2 -10   25.98    3.37
  -2  15 -10   22.89    2.20
 -15  -2  10   19.71    2.56
 -15  -2  10   14.61    2.30
 -15  -1 -10    2.47    2.29
 -15  -1  10    2.59    1.81
 -15   0 -10   42.26    3.79
 -15   0  10   44.61    3.75
 -15   1 -10    2.18    2.08
 -15   1  10    2.27    1.85
 -15   2 -10   21.15    2.87
 -15   2  10   17.06    2.55
 -15   3 -10   27.03    2.76
  -3 -15  10   25.61    3.70
 -15   3  10   25.80    3.00
   4  15 -10   12.11    2.38
 -15   4 -10   11.26    2.26
 -15   4  10   15.96    2.69
  -4 -15  10   10.81    2.34
 -15   5 -10   22.01    2.65
   5  15 -10   26.59    3.07
 -15   5  10   28.77    4.07
  -5 -15  10   25.27    3.06
   0   0 -11    0.35    0.50
   0   0  11    0.28    0.38
   0   1 -11   17.40    1.24
   0  -1 -11   17.67    1.16
  -1   0 -11   16.40    1.19
   1   0 -11   19.39    1.20
   0   1  11   22.71    1.10
  -1   0  11   18.98    1.14
   1   0  11   19.75    1.06
   0  -1  11   19.75    1.12
   1  -1 -11    9.48    0.87
  -1   1 -11    8.68    0.89
  -1  -1 -11   13.11    1.04
   1   1 -11    9.72    0.91
  -1  -1  11   11.17    0.90
   1   1  11   10.67    0.76
   1  -1  11   12.97    0.86
  -1  -1  11   10.07    0.99
  -1   1  11   11.46    0.87
   2   1 -11   20.27    1.35
  -2  -1 -11   21.44    1.42
  -1   2 -11   20.82    1.36
   1  -2 -11   21.44    1.20
  -1   2  11   25.75    1.32
  -2  -1  11   22.98    1.54
  -2  -1  11   28.63    1.41
   2   1  11   27.18    1.23
   2   0 -11   21.88    1.33
   0  -2 -11   20.51    1.27
   0   2 -11   22.55    1.44
  -2   0 -11   22.58    1.44
  -2   0  11   21.66    1.34
   0   2  11   21.93    1.11
  -2   0  11   21.59    1.25
   2   0  11   21.06    1.10
  -2   1 -11   25.77    1.55
   2  -1 -11   23.53    1.34
   1   2 -11   24.75    1.50
  -1  -2 -11   27.48    1.47
   1   2  11   24.53    1.11
  -1  -2  11   22.63    1.27
  -1  -2  11   21.05    1.45
   2  -1  11   23.46    1.20
  -2   1  11   21.20    1.28
  -2   2 -11   15.95    1.25
  -2  -2 -11   16.71    1.30
   2  -2 -11   16.60    1.04
   2   2 -11   18.18    1.35
   2   2  11   17.41    0.91
  -2   2  11   18.16    1.13
  -2  -2  11   17.18    1.11
   2  -2  11   17.49    1.09
  -2  -2  11   16.81    1.38
  -3  -2 -11   57.20    2.62
   3   2 -11   50.85    2.55
  -2   3 -11   57.25    2.59
   2  -3 -11   54.66    2.26
  -3  -2  11   34.93    2.07
  -2   3  11   37.09    1.80
   3   2  11   38.58    1.60
   2  -3  11   41.25    1.83
  -3  -2  11   42.06    1.90
  -3  -1 -11   80.98    3.32
   1  -3 -11   76.65    3.01
   3   1 -11   75.81    3.22
  -1   3 -11   69.90    3.22
  -3  -1  11   72.89    2.99
   1  -3  11   71.56    2.92
  -1   3  11   73.20    2.88
  -3  -1  11   66.59    3.10
   3   1  11   77.11    2.81
   0   3 -11  194.30    6.99
   3   0 -11  179.27    6.84
  -3   0 -11  179.61    6.94
   0  -3 -11  178.43    6.76
   0  -3  11  194.16    7.19
   0   3  11  192.07    7.08
   3   0  11  199.37    7.12
   0  -3  11  197.63    7.45
  -3   0  11  194.47    7.32
  -3   0  11  197.18    7.25
   3  -1 -11   72.86    2.91
  -3   1 -11   64.40    3.04
  -1  -3 -11   74.44    2.97
   1   3 -11   68.42    3.09
  -3   1  11   79.49    3.27
   1   3  11   81.68    3.04
   3  -1  11   82.04    3.16
  -1  -3  11   78.76    3.47
  -3   1  11   77.84    3.25
  -1  -3  11   82.88    3.22
   3  -2 -11   38.91    1.72
  -3   2 -11   34.85    1.95
   2   3 -11   38.51    2.07
  -2  -3 -11   37.28    1.93
  -2  -3  11   56.26    2.42
   3  -2  11   55.52    2.38
  -2  -3  11   57.30    2.73
   2   3  11   56.99    2.17
  -3   2  11   57.70    2.47
  -3   2  11   54.74    2.36
   3  -3 -11   69.49    2.77
  -3   3 -11   73.83    3.15
  -3  -3 -11   68.36    3.09
  -3   3  11   71.71    3.04
  -3  -3  11   74.12    3.34
   3   3  11   74.93    2.75
  -3  -3  11   71.41    3.03
   3  -3  11   75.07    3.03
  -4  -3 -11  188.93    7.03
  -3   4 -11  172.28    6.92
  -3   4 -11  182.81    6.75
  -4  -3 -11  184.56    6.49
   3  -4 -11  176.91    6.55
   3  -4  11  209.52    7.69
  -3   4  11  202.15    7.69
  -4  -3  11  216.94    8.03
  -4  -3  11  201.35    7.71
   4   3  11  207.20    7.41
  -4  -2 -11  204.41    6.89
  -2   4 -11  182.40    7.25
  -4  -2 -11  187.83    7.31
   2  -4 -11  187.26    6.92
  -4  -2  11  180.79    7.21
  -4  -2  11  193.72    7.05
   4   2  11  188.21    6.77
  -2   4  11  185.81    6.93
   2  -4  11  189.56    6.97
  -1   4 -11   47.23    2.39
  -4  -1 -11   46.42    2.00
   1  -4 -11   50.14    2.09
  -4  -1 -11   53.06    2.53
  -4  -1  11   39.05    2.12
   4   1  11   42.09    1.76
   1  -4  11   39.75    1.89
  -1   4  11   40.02    1.83
  -4  -1  11   44.06    2.05
   4   0 -11  220.82    7.81
   0   4 -11  193.50    7.87
   0  -4 -11  213.89    7.66
  -4   0 -11  213.72    7.58
  -4   0 -11  199.06    7.90
  -4   0  11  216.64    8.04
   4   0  11  232.25    7.91
  -4   0  11  208.80    8.08
   0  -4  11  222.08    7.97
   0   4  11  215.76    7.83
   0  -4  11  206.82    8.21
   4  -1 -11   40.27    1.85
  -4   1 -11   35.59    1.71
  -1  -4 -11   38.14    1.86
  -4   1 -11   36.21    2.05
  -4   1  11   47.62    2.26
   4  -1  11   49.27    2.11
  -1  -4  11   46.53    2.14
  -1  -4  11   50.67    2.52
  -4   1  11   49.62    2.23
   1   4  11   47.93    1.93
  -4   2 -11  167.21    6.90
   4  -2 -11  180.58    6.67
  -4   2 -11  188.24    6.70
  -2  -4 -11  189.88    6.86
   2   4 -11  177.12    7.01
   2   4  11  207.27    7.20
  -4   2  11  202.63    7.53
  -4   2  11  203.61    7.41
   4  -2  11  205.34    7.44
  -2  -4  11  192.97    7.74
  -2  -4  11  196.56    7.44
  -4   3 -11  195.46    7.17
  -4   3 -11  183.75    7.37
  -3  -4 -11  205.64    7.38
   4  -3 -11  188.22    7.02
  -4   3  11  190.65    7.15
  -3  -4  11  188.53    7.41
   4  -3  11  189.41    7.08
  -3  -4  11  190.40    7.09
   3   4  11  191.70    6.76
  -4  -4 -11  135.15    5.50
   4  -4 -11  134.11    5.01
  -4   4 -11  142.37    5.28
  -4   4 -11  137.50    5.47
  -4   4  11  148.28    5.74
   4   4  11  147.67    5.31
   4  -4  11  149.65    5.69
  -4  -4  11  147.53    5.70
  -4  -4  11  151.32    6.07
  -5  -4 -11  117.62    5.03
  -4   5 -11  121.10    4.76
  -4   5 -11  123.46    4.94
  -5  -4  11  135.67    5.73
  -4   5  11  138.43    5.40
   4  -5  11  139.46    5.39
  -5  -4  11  138.18    5.39
  -5  -3 -11  118.47    5.04
  -3   5 -11  125.12    4.96
  -3   5 -11  122.13    4.74
   3  -5 -11  119.16    4.43
  -5  -3 -11  125.01    4.47
   3  -5  11  118.43    4.78
  -5  -3  11  123.15    4.85
  -5  -3  11  118.27    5.09
  -3   5  11  129.47    4.80
  -5  -2 -11   23.05    1.18
  -5  -2 -11   21.45    1.77
   2  -5 -11   24.32    1.15
  -2   5 -11   21.89    1.58
  -2   5  11   33.69    1.73
  -5  -2  11   33.99    2.09
  -5  -2  11   31.51    1.85
   2  -5  11   34.76    1.80
   5   2  11   34.98    1.52
  -5  -1 -11   52.76    2.67
   1  -5 -11   55.12    2.20
  -5  -1 -11   48.32    2.15
  -1   5 -11   52.66    2.56
  -5  -1  11   39.46    2.09
  -1   5  11   35.84    1.69
   1  -5  11   33.90    2.09
   5   1  11   36.02    1.65
   1  -5  11   36.37    1.84
  -5  -1  11   38.30    1.98
  -5   0 -11  220.03    8.30
   0  -5 -11  239.29    8.37
   0   5 -11  235.32    8.68
  -5   0 -11  219.14    8.66
   0   5  11  229.90    8.33
  -5   0  11  229.73    8.62
   0  -5  11  243.95    8.81
   5   0  11  224.08    8.40
  -5   0  11  227.95    8.59
   0  -5  11  231.78    8.49
  -5   1 -11   34.13    2.15
   1   5 -11   38.25    2.14
  -1  -5 -11   37.36    1.85
  -5   1 -11   37.07    1.75
   5  -1  11   55.26    2.38
   1   5  11   51.87    2.15
  -1  -5  11   54.60    2.43
  -1  -5  11   57.87    2.82
  -5   1  11   53.19    2.55
  -5   1  11   59.31    2.50
  -5   2 -11   32.75    1.69
  -5   2 -11   31.87    2.00
   2   5 -11   30.28    1.97
  -2  -5 -11   34.52    1.84
   5  -2 -11   33.08    1.64
[truncated: 579,442 more chars]
