# Supplementary material
Source: MDPI journal article supplement (https://www.mdpi.com/2304-6740/7/9/105)
Supplement: s1 [file s1 › Complex2_CIF.cif]

 
data_s1 
  
_audit_creation_method            'SHELXL-2017/1' 
_shelx_SHELXL_version_number      '2017/1' 
_chemical_name_systematic         ? 
_chemical_name_common             ? 
_chemical_melting_point           ? 
_chemical_formula_moiety          ? 
_chemical_formula_sum 
 'C38 H58 P2 Si2 U' 
_chemical_formula_weight          870.99 
  
loop_ 
 _atom_type_symbol 
 _atom_type_description 
 _atom_type_scat_dispersion_real 
 _atom_type_scat_dispersion_imag 
 _atom_type_scat_source 
 'C'  'C'   0.0033   0.0016 
 'International Tables Vol C Tables 4.2.6.8 and 6.1.1.4' 
 'H'  'H'   0.0000   0.0000 
 'International Tables Vol C Tables 4.2.6.8 and 6.1.1.4' 
 'Si'  'Si'   0.0817   0.0704 
 'International Tables Vol C Tables 4.2.6.8 and 6.1.1.4' 
 'P'  'P'   0.1023   0.0942 
 'International Tables Vol C Tables 4.2.6.8 and 6.1.1.4' 
 'U'  'U'  -9.6767   9.6646 
 'International Tables Vol C Tables 4.2.6.8 and 6.1.1.4' 
  
_space_group_crystal_system       tetragonal 
_space_group_IT_number            96 
_space_group_name_H-M_alt         'P 43 21 2' 
_space_group_name_Hall            'P 4nw 2abw' 
  
_shelx_space_group_comment 
; 
The symmetry employed for this shelxl refinement is uniquely defined 
by the following loop, which should always be used as a source of 
symmetry information in preference to the above space-group names. 
They are only intended as comments. 
; 
  
loop_ 
 _space_group_symop_operation_xyz 
 'x, y, z' 
 '-x, -y, z+1/2' 
 '-y+1/2, x+1/2, z+3/4' 
 'y+1/2, -x+1/2, z+1/4' 
 '-x+1/2, y+1/2, -z+3/4' 
 'x+1/2, -y+1/2, -z+1/4' 
 'y, x, -z' 
 '-y, -x, -z+1/2' 
  
_cell_length_a                    12.0767(11) 
_cell_length_b                    12.0767(11) 
_cell_length_c                    26.931(3) 
_cell_angle_alpha                 90 
_cell_angle_beta                  90 
_cell_angle_gamma                 90 
_cell_volume                      3927.8(8) 
_cell_formula_units_Z             4 
_cell_measurement_temperature     100(2) 
_cell_measurement_reflns_used     9962 
_cell_measurement_theta_min       2.27 
_cell_measurement_theta_max       27.78 
  
_exptl_crystal_description        plate 
_exptl_crystal_colour             brown 
_exptl_crystal_density_meas       ? 
_exptl_crystal_density_method     'not measured' 
_exptl_crystal_density_diffrn     1.473 
_exptl_crystal_F_000              1744 
_exptl_transmission_factor_min    ? 
_exptl_transmission_factor_max    ? 
_exptl_crystal_size_max           0.110 
_exptl_crystal_size_mid           0.090 
_exptl_crystal_size_min           0.050 
_exptl_absorpt_coefficient_mu     4.299 
_shelx_estimated_absorpt_T_min    0.649 
_shelx_estimated_absorpt_T_max    0.814 
_exptl_absorpt_correction_type    multi-scan 
_exptl_absorpt_correction_T_min   0.6885 
_exptl_absorpt_correction_T_max   0.7456 
_exptl_absorpt_process_details    'Bruker AXScale' 
_exptl_absorpt_special_details    ? 
_diffrn_ambient_temperature       100(2) 
_diffrn_radiation_wavelength      0.71073 
_diffrn_radiation_type            MoK\a 
_diffrn_source                    ? 
_diffrn_measurement_device_type   'Bruker APEX-II CCD' 
_diffrn_measurement_method        '\f and \w scans' 
_diffrn_detector_area_resol_mean  ? 
_diffrn_reflns_number             81732 
_diffrn_reflns_av_unetI/netI      0.0280 
_diffrn_reflns_av_R_equivalents   0.0615 
_diffrn_reflns_limit_h_min        -15 
_diffrn_reflns_limit_h_max        15 
_diffrn_reflns_limit_k_min        -15 
_diffrn_reflns_limit_k_max        15 
_diffrn_reflns_limit_l_min        -35 
_diffrn_reflns_limit_l_max        35 
_diffrn_reflns_theta_min          2.502 
_diffrn_reflns_theta_max          27.888 
_diffrn_reflns_theta_full         25.242 
_diffrn_measured_fraction_theta_max   0.999 
_diffrn_measured_fraction_theta_full  0.999 
_diffrn_reflns_Laue_measured_fraction_max    0.999 
_diffrn_reflns_Laue_measured_fraction_full   0.999 
_diffrn_reflns_point_group_measured_fraction_max   0.999 
_diffrn_reflns_point_group_measured_fraction_full  0.999 
_reflns_number_total              4691 
_reflns_number_gt                 4330 
_reflns_threshold_expression      'I > 2\s(I)' 
_reflns_Friedel_coverage          0.704 
_reflns_Friedel_fraction_max      1.000 
_reflns_Friedel_fraction_full     1.000 
  
_reflns_special_details 
; 
 Reflections were merged by SHELXL according to the crystal 
 class for the calculation of statistics and refinement. 
  
 _reflns_Friedel_fraction is defined as the number of unique 
 Friedel pairs measured divided by the number that would be 
 possible theoretically, ignoring centric projections and 
 systematic absences. 
; 
  
_computing_data_collection        'Bruker APEX2' 
_computing_cell_refinement        'Bruker SAINT' 
_computing_data_reduction         'Bruker SAINT' 
_computing_structure_solution     'SHELXS-97 (Sheldrick 2008)' 
_computing_structure_refinement 'SHELXL-2017/1 (Sheldrick, 2017)' 
_computing_molecular_graphics     'Bruker SHELXTL' 
_computing_publication_material   'Bruker SHELXTL' 
_refine_special_details 
; 
 Refined as a 2-component inversion twin. 
; 
_refine_ls_structure_factor_coef  Fsqd 
_refine_ls_matrix_type            full 
_refine_ls_weighting_scheme       calc 
_refine_ls_weighting_details 
'w=1/[\s^2^(Fo^2^)+(0.0136P)^2^+0.7178P] where P=(Fo^2^+2Fc^2^)/3' 
_atom_sites_solution_primary      direct 
_atom_sites_solution_secondary    difmap 
_atom_sites_solution_hydrogens    geom 
_refine_ls_hydrogen_treatment     constr 
_refine_ls_extinction_method      none 
_refine_ls_extinction_coef        . 
_refine_ls_abs_structure_details 
; 
 Refined as an inversion twin. 
; 
_refine_ls_abs_structure_Flack    0.022(5) 
_chemical_absolute_configuration  ? 
_refine_ls_number_reflns          4691 
_refine_ls_number_parameters      204 
_refine_ls_number_restraints      0 
_refine_ls_R_factor_all           0.0212 
_refine_ls_R_factor_gt            0.0166 
_refine_ls_wR_factor_ref          0.0330 
_refine_ls_wR_factor_gt           0.0320 
_refine_ls_goodness_of_fit_ref    0.983 
_refine_ls_restrained_S_all       0.983 
_refine_ls_shift/su_max           0.001 
_refine_ls_shift/su_mean          0.000 
  
loop_ 
 _atom_site_label 
 _atom_site_type_symbol 
 _atom_site_fract_x 
 _atom_site_fract_y 
 _atom_site_fract_z 
 _atom_site_U_iso_or_equiv 
 _atom_site_adp_type 
 _atom_site_occupancy 
 _atom_site_site_symmetry_order 
 _atom_site_calc_flag 
 _atom_site_refinement_flags_posn 
 _atom_site_refinement_flags_adp 
 _atom_site_refinement_flags_occupancy 
 _atom_site_disorder_assembly 
 _atom_site_disorder_group 
U1 U 0.47085(2) 0.47085(2) 0.000000 0.01169(4) Uani 1 2 d S T P . . 
P1 P 0.46751(8) 0.69739(6) 0.00935(3) 0.01813(16) Uani 1 1 d . . . . . 
Si1 Si 0.56945(8) 0.81349(8) 0.05454(3) 0.0227(2) Uani 1 1 d . . . . . 
C1 C 0.3922(3) 0.3056(3) 0.06060(12) 0.0246(8) Uani 1 1 d . . . . . 
C2 C 0.3481(3) 0.4059(3) 0.07901(11) 0.0232(7) Uani 1 1 d . . . . . 
C3 C 0.4364(2) 0.4673(3) 0.10010(10) 0.0195(7) Uani 1 1 d . . . . . 
C4 C 0.5348(3) 0.4051(3) 0.09468(9) 0.0185(6) Uani 1 1 d . . . . . 
C5 C 0.5074(3) 0.3061(2) 0.06954(11) 0.0213(8) Uani 1 1 d . . . . . 
C6 C 0.3300(4) 0.2028(3) 0.04597(14) 0.0417(11) Uani 1 1 d . . . . . 
H6A H 0.338938 0.146326 0.071793 0.063 Uiso 1 1 calc R U . . . 
H6B H 0.359180 0.174644 0.014457 0.063 Uiso 1 1 calc R U . . . 
H6C H 0.251226 0.220433 0.042134 0.063 Uiso 1 1 calc R U . . . 
C7 C 0.2292(3) 0.4418(4) 0.08191(14) 0.0376(11) Uani 1 1 d . . . . . 
H7A H 0.210187 0.458544 0.116471 0.056 Uiso 1 1 calc R U . . . 
H7B H 0.181457 0.382105 0.069672 0.056 Uiso 1 1 calc R U . . . 
H7C H 0.218461 0.508027 0.061472 0.056 Uiso 1 1 calc R U . . . 
C8 C 0.4239(3) 0.5696(3) 0.13129(10) 0.0278(7) Uani 1 1 d . . . . . 
H8A H 0.398225 0.548975 0.164535 0.042 Uiso 1 1 calc R U . . . 
H8B H 0.369853 0.619337 0.115815 0.042 Uiso 1 1 calc R U . . . 
H8C H 0.495542 0.607369 0.133859 0.042 Uiso 1 1 calc R U . . . 
C9 C 0.6427(3) 0.4314(3) 0.11922(11) 0.0253(8) Uani 1 1 d . . . . . 
H9A H 0.633169 0.430282 0.155349 0.038 Uiso 1 1 calc R U . . . 
H9B H 0.667614 0.505014 0.108771 0.038 Uiso 1 1 calc R U . . . 
H9C H 0.698094 0.376067 0.109606 0.038 Uiso 1 1 calc R U . . . 
C10 C 0.5810(3) 0.2070(3) 0.06094(13) 0.0311(9) Uani 1 1 d . . . . . 
H10A H 0.556549 0.145611 0.082064 0.047 Uiso 1 1 calc R U . . . 
H10B H 0.657703 0.226245 0.069177 0.047 Uiso 1 1 calc R U . . . 
H10C H 0.576663 0.184713 0.026008 0.047 Uiso 1 1 calc R U . . . 
C11 C 0.6854(3) 0.7349(3) 0.08440(14) 0.0362(9) Uani 1 1 d . . . . . 
H11A H 0.747594 0.785094 0.090641 0.054 Uiso 1 1 calc R U . . . 
H11B H 0.709373 0.675118 0.062264 0.054 Uiso 1 1 calc R U . . . 
H11C H 0.659822 0.703347 0.115903 0.054 Uiso 1 1 calc R U . . . 
C12 C 0.6314(3) 0.9222(3) 0.01347(13) 0.0353(9) Uani 1 1 d . . . . . 
H12A H 0.672702 0.975387 0.033767 0.053 Uiso 1 1 calc R U . . . 
H12B H 0.572257 0.960835 -0.004439 0.053 Uiso 1 1 calc R U . . . 
H12C H 0.681650 0.887248 -0.010423 0.053 Uiso 1 1 calc R U . . . 
C13 C 0.4826(3) 0.8848(3) 0.10262(12) 0.0346(9) Uani 1 1 d . . . . . 
H13A H 0.528024 0.938998 0.120504 0.052 Uiso 1 1 calc R U . . . 
H13B H 0.453799 0.829933 0.126094 0.052 Uiso 1 1 calc R U . . . 
H13C H 0.420745 0.922808 0.086385 0.052 Uiso 1 1 calc R U . . . 
C14 C 0.3516(3) 0.7910(2) -0.00498(11) 0.0192(7) Uani 1 1 d . . . . . 
C15 C 0.3587(3) 0.8699(3) -0.04310(12) 0.0235(8) Uani 1 1 d . . . . . 
H15A H 0.424850 0.875697 -0.061987 0.028 Uiso 1 1 calc R U . . . 
C16 C 0.2703(3) 0.9396(3) -0.05359(13) 0.0308(9) Uani 1 1 d . . . . . 
H16A H 0.276177 0.991779 -0.079836 0.037 Uiso 1 1 calc R U . . . 
C17 C 0.1740(3) 0.9335(3) -0.02622(13) 0.0341(9) Uani 1 1 d . . . . . 
H17A H 0.113632 0.981294 -0.033470 0.041 Uiso 1 1 calc R U . . . 
C18 C 0.1663(3) 0.8575(3) 0.01177(12) 0.0319(9) Uani 1 1 d . . . . . 
H18A H 0.100570 0.853544 0.031083 0.038 Uiso 1 1 calc R U . . . 
C19 C 0.2538(3) 0.7867(3) 0.02200(11) 0.0254(8) Uani 1 1 d . . . . . 
H19A H 0.246662 0.734065 0.048032 0.030 Uiso 1 1 calc R U . . . 
  
loop_ 
 _atom_site_aniso_label 
 _atom_site_aniso_U_11 
 _atom_site_aniso_U_22 
 _atom_site_aniso_U_33 
 _atom_site_aniso_U_23 
 _atom_site_aniso_U_13 
 _atom_site_aniso_U_12 
U1 0.01107(5) 0.01107(5) 0.01293(7) -0.00042(5) 0.00042(5) -0.00079(7) 
P1 0.0221(4) 0.0128(3) 0.0194(4) -0.0009(3) -0.0063(4) 0.0006(4) 
Si1 0.0285(5) 0.0150(5) 0.0244(5) -0.0040(4) -0.0055(4) -0.0039(4) 
C1 0.031(2) 0.0201(18) 0.0227(17) 0.0061(14) 0.0095(15) -0.0078(16) 
C2 0.0207(18) 0.028(2) 0.0204(16) 0.0064(15) 0.0111(13) -0.0024(14) 
C3 0.0231(17) 0.0208(16) 0.0146(13) 0.0053(13) 0.0060(11) 0.0016(16) 
C4 0.0234(17) 0.0202(16) 0.0120(13) 0.0072(12) 0.0043(14) 0.0052(15) 
C5 0.029(2) 0.0150(15) 0.0202(16) 0.0097(12) 0.0111(13) 0.0028(14) 
C6 0.052(3) 0.028(2) 0.044(2) 0.0046(19) 0.011(2) -0.018(2) 
C7 0.0205(19) 0.053(3) 0.039(2) 0.0023(19) 0.0108(16) -0.0007(17) 
C8 0.036(2) 0.029(2) 0.0187(15) -0.0008(14) 0.0060(15) 0.0117(15) 
C9 0.0263(19) 0.032(2) 0.0171(15) 0.0049(14) 0.0008(14) 0.0093(15) 
C10 0.044(2) 0.0171(18) 0.0320(19) 0.0098(15) 0.0125(18) 0.0090(17) 
C11 0.034(2) 0.030(2) 0.045(2) -0.0020(17) -0.0186(18) -0.0086(17) 
C12 0.046(2) 0.0217(18) 0.038(2) -0.0044(16) 0.0018(17) -0.0122(18) 
C13 0.046(2) 0.0254(18) 0.0322(19) -0.0127(15) -0.0012(18) -0.0062(19) 
C14 0.0259(17) 0.0144(15) 0.0174(15) -0.0042(14) -0.0056(15) 0.0010(12) 
C15 0.033(2) 0.0186(17) 0.0194(16) -0.0008(14) -0.0046(15) 0.0019(15) 
C16 0.045(2) 0.0206(19) 0.0269(18) 0.0021(14) -0.0176(17) 0.0035(16) 
C17 0.034(2) 0.032(2) 0.036(2) -0.0074(17) -0.0132(17) 0.0160(17) 
C18 0.027(2) 0.042(2) 0.0262(18) -0.0087(15) 0.0001(14) 0.0099(17) 
C19 0.031(2) 0.027(2) 0.0173(15) -0.0023(14) -0.0012(14) 0.0050(16) 
  
_geom_special_details 
; 
 All esds (except the esd in the dihedral angle between two l.s. planes) 
 are estimated using the full covariance matrix.  The cell esds are taken 
 into account individually in the estimation of esds in distances, angles 
 and torsion angles; correlations between esds in cell parameters are only 
 used when they are defined by crystal symmetry.  An approximate (isotropic) 
 treatment of cell esds is used for estimating esds involving l.s. planes. 
; 
  
loop_ 
 _geom_bond_atom_site_label_1 
 _geom_bond_atom_site_label_2 
 _geom_bond_distance 
 _geom_bond_site_symmetry_2 
 _geom_bond_publ_flag 
U1 C2 2.709(3) . ? 
U1 C2 2.709(3) 7 ? 
U1 C3 2.728(3) . ? 
U1 C3 2.728(3) 7 ? 
U1 C1 2.748(3) . ? 
U1 C1 2.748(3) 7 ? 
U1 P1 2.7477(8) . ? 
U1 P1 2.7478(8) 7 ? 
U1 C5 2.768(3) . ? 
U1 C5 2.768(3) 7 ? 
U1 C4 2.780(3) 7 ? 
U1 C4 2.780(3) . ? 
P1 C14 1.841(3) . ? 
P1 Si1 2.2278(12) . ? 
Si1 C12 1.873(3) . ? 
Si1 C11 1.873(4) . ? 
Si1 C13 1.876(4) . ? 
C1 C5 1.413(5) . ? 
C1 C2 1.413(5) . ? 
C1 C6 1.503(5) . ? 
C2 C3 1.418(4) . ? 
C2 C7 1.502(5) . ? 
C3 C4 1.413(4) . ? 
C3 C8 1.502(4) . ? 
C4 C5 1.412(4) . ? 
C4 C9 1.495(5) . ? 
C5 C10 1.509(5) . ? 
C14 C19 1.387(4) . ? 
C14 C15 1.403(4) . ? 
C15 C16 1.388(5) . ? 
C16 C17 1.379(5) . ? 
C17 C18 1.378(5) . ? 
C18 C19 1.388(4) . ? 
  
loop_ 
 _geom_angle_atom_site_label_1 
 _geom_angle_atom_site_label_2 
 _geom_angle_atom_site_label_3 
 _geom_angle 
 _geom_angle_site_symmetry_1 
 _geom_angle_site_symmetry_3 
 _geom_angle_publ_flag 
C2 U1 C2 107.46(14) . 7 ? 
C2 U1 C3 30.23(9) . . ? 
C2 U1 C3 136.34(10) 7 . ? 
C2 U1 C3 136.34(10) . 7 ? 
C2 U1 C3 30.23(9) 7 7 ? 
C3 U1 C3 166.35(13) . 7 ? 
C2 U1 C1 30.01(10) . . ? 
C2 U1 C1 88.22(10) 7 . ? 
C3 U1 C1 49.38(10) . . ? 
C3 U1 C1 118.09(9) 7 . ? 
C2 U1 C1 88.22(10) . 7 ? 
C2 U1 C1 30.01(10) 7 7 ? 
C3 U1 C1 118.09(10) . 7 ? 
C3 U1 C1 49.38(10) 7 7 ? 
C1 U1 C1 81.40(14) . 7 ? 
C2 U1 P1 102.03(8) . . ? 
C2 U1 P1 127.76(7) 7 . ? 
C3 U1 P1 85.58(7) . . ? 
C3 U1 P1 104.00(6) 7 . ? 
C1 U1 P1 131.60(7) . . ? 
C1 U1 P1 112.83(8) 7 . ? 
C2 U1 P1 127.76(7) . 7 ? 
C2 U1 P1 102.03(8) 7 7 ? 
C3 U1 P1 104.00(6) . 7 ? 
C3 U1 P1 85.58(7) 7 7 ? 
C1 U1 P1 112.83(8) . 7 ? 
C1 U1 P1 131.60(7) 7 7 ? 
P1 U1 P1 92.16(4) . 7 ? 
C2 U1 C5 49.28(10) . . ? 
C2 U1 C5 100.64(10) 7 . ? 
C3 U1 C5 49.02(9) . . ? 
C3 U1 C5 124.18(9) 7 . ? 
C1 U1 C5 29.68(10) . . ? 
C1 U1 C5 105.63(10) 7 . ? 
P1 U1 C5 130.99(7) . . ? 
P1 U1 C5 83.83(7) 7 . ? 
C2 U1 C5 100.64(10) . 7 ? 
C2 U1 C5 49.28(10) 7 7 ? 
C3 U1 C5 124.18(9) . 7 ? 
C3 U1 C5 49.02(9) 7 7 ? 
C1 U1 C5 105.63(10) . 7 ? 
C1 U1 C5 29.68(10) 7 7 ? 
P1 U1 C5 83.83(7) . 7 ? 
P1 U1 C5 130.99(7) 7 7 ? 
C5 U1 C5 133.43(14) . 7 ? 
C2 U1 C4 130.13(10) . 7 ? 
C2 U1 C4 49.37(10) 7 7 ? 
C3 U1 C4 150.14(8) . 7 ? 
C3 U1 C4 29.71(9) 7 7 ? 
C1 U1 C4 130.37(10) . 7 ? 
C1 U1 C4 48.99(10) 7 7 ? 
P1 U1 C4 78.65(7) . 7 ? 
P1 U1 C4 101.80(7) 7 7 ? 
C5 U1 C4 149.99(10) . 7 ? 
C5 U1 C4 29.50(9) 7 7 ? 
C2 U1 C4 49.37(10) . . ? 
C2 U1 C4 130.13(10) 7 . ? 
C3 U1 C4 29.71(9) . . ? 
C3 U1 C4 150.14(8) 7 . ? 
C1 U1 C4 48.99(10) . . ? 
C1 U1 C4 130.37(10) 7 . ? 
P1 U1 C4 101.80(7) . . ? 
P1 U1 C4 78.65(7) 7 . ? 
C5 U1 C4 29.50(9) . . ? 
C5 U1 C4 149.99(10) 7 . ? 
C4 U1 C4 179.36(14) 7 . ? 
C14 P1 Si1 98.53(10) . . ? 
C14 P1 U1 127.13(10) . . ? 
Si1 P1 U1 131.96(4) . . ? 
C12 Si1 C11 108.07(18) . . ? 
C12 Si1 C13 108.01(17) . . ? 
C11 Si1 C13 110.75(17) . . ? 
C12 Si1 P1 109.83(12) . . ? 
C11 Si1 P1 109.19(12) . . ? 
C13 Si1 P1 110.94(13) . . ? 
C5 C1 C2 107.9(3) . . ? 
C5 C1 C6 122.8(3) . . ? 
C2 C1 C6 127.7(3) . . ? 
C5 C1 U1 75.94(18) . . ? 
C2 C1 U1 73.49(18) . . ? 
C6 C1 U1 128.1(2) . . ? 
C1 C2 C3 107.8(3) . . ? 
C1 C2 C7 128.7(3) . . ? 
C3 C2 C7 123.2(3) . . ? 
C1 C2 U1 76.50(18) . . ? 
C3 C2 U1 75.61(16) . . ? 
C7 C2 U1 118.7(2) . . ? 
C4 C3 C2 108.2(3) . . ? 
C4 C3 C8 125.4(3) . . ? 
C2 C3 C8 125.4(3) . . ? 
C4 C3 U1 77.19(15) . . ? 
C2 C3 U1 74.16(16) . . ? 
C8 C3 U1 123.7(2) . . ? 
C5 C4 C3 107.6(3) . . ? 
C5 C4 C9 126.5(3) . . ? 
C3 C4 C9 125.0(3) . . ? 
C5 C4 U1 74.75(16) . . ? 
C3 C4 U1 73.10(15) . . ? 
C9 C4 U1 125.9(2) . . ? 
C4 C5 C1 108.5(3) . . ? 
C4 C5 C10 127.4(3) . . ? 
C1 C5 C10 123.4(3) . . ? 
C4 C5 U1 75.75(16) . . ? 
C1 C5 U1 74.39(18) . . ? 
C10 C5 U1 124.1(2) . . ? 
C19 C14 C15 117.5(3) . . ? 
C19 C14 P1 120.9(2) . . ? 
C15 C14 P1 121.6(3) . . ? 
C16 C15 C14 120.9(3) . . ? 
C17 C16 C15 120.5(3) . . ? 
C18 C17 C16 119.3(3) . . ? 
C17 C18 C19 120.4(3) . . ? 
C18 C19 C14 121.4(3) . . ? 
  
_refine_diff_density_max    0.458 
_refine_diff_density_min   -0.315 
_refine_diff_density_rms    0.059 
  
_shelx_res_file 
; 
TITL s1 in P4(3)2(1)2 
    s1.res 
    created by SHELXL-2017/1 at 15:55:03 on 09-Jan-2018 
CELL 0.71073  12.07670  12.07670  26.93120  90.0000  90.0000  90.0000 
ZERR    4.00   0.00110   0.00110   0.00260   0.0000   0.0000   0.0000 
LATT -1 
SYMM -X, -Y, 0.5+Z 
SYMM 0.5-Y, 0.5+X, 0.75+Z 
SYMM 0.5+Y, 0.5-X, 0.25+Z 
SYMM 0.5-X, 0.5+Y, 0.75-Z 
SYMM 0.5+X, 0.5-Y, 0.25-Z 
SYMM Y, X, -Z 
SYMM -Y, -X, 0.5-Z 
SFAC C H SI P U 
UNIT 152 232 8 8 4 
TEMP -173 
SIZE 0.05 0.09 0.11 
L.S. 16 
ACTA 
FMAP 2 
PLAN 20 
OMIT 1 1 0 
TWIN 
WGHT    0.013600    0.717800 
BASF   0.02227 
FVAR       0.07827 
U1    5    0.470850    0.470850    0.000000    10.50000    0.01107    0.01107 = 
         0.01293   -0.00042    0.00042   -0.00079 
P1    4    0.467510    0.697392    0.009348    11.00000    0.02213    0.01284 = 
         0.01942   -0.00090   -0.00631    0.00062 
SI1   3    0.569448    0.813492    0.054543    11.00000    0.02854    0.01504 = 
         0.02444   -0.00399   -0.00555   -0.00387 
C1    1    0.392197    0.305550    0.060595    11.00000    0.03102    0.02010 = 
         0.02268    0.00607    0.00952   -0.00783 
C2    1    0.348128    0.405878    0.079015    11.00000    0.02074    0.02848 = 
         0.02038    0.00645    0.01111   -0.00243 
C3    1    0.436450    0.467289    0.100098    11.00000    0.02314    0.02081 = 
         0.01460    0.00529    0.00602    0.00165 
C4    1    0.534801    0.405078    0.094682    11.00000    0.02342    0.02024 = 
         0.01198    0.00718    0.00434    0.00524 
C5    1    0.507444    0.306148    0.069543    11.00000    0.02871    0.01498 = 
         0.02025    0.00970    0.01111    0.00282 
C6    1    0.329971    0.202797    0.045972    11.00000    0.05240    0.02835 = 
         0.04443    0.00459    0.01105   -0.01773 
AFIX 137 
H6A   2    0.338938    0.146326    0.071793    11.00000   -1.50000 
H6B   2    0.359180    0.174644    0.014457    11.00000   -1.50000 
H6C   2    0.251226    0.220433    0.042134    11.00000   -1.50000 
AFIX   0 
C7    1    0.229230    0.441755    0.081909    11.00000    0.02052    0.05348 = 
         0.03894    0.00235    0.01078   -0.00070 
AFIX 137 
H7A   2    0.210187    0.458544    0.116471    11.00000   -1.50000 
H7B   2    0.181457    0.382105    0.069672    11.00000   -1.50000 
H7C   2    0.218461    0.508027    0.061472    11.00000   -1.50000 
AFIX   0 
C8    1    0.423930    0.569635    0.131287    11.00000    0.03562    0.02907 = 
         0.01866   -0.00078    0.00602    0.01171 
AFIX 137 
H8A   2    0.398225    0.548975    0.164535    11.00000   -1.50000 
H8B   2    0.369853    0.619337    0.115815    11.00000   -1.50000 
H8C   2    0.495542    0.607369    0.133859    11.00000   -1.50000 
AFIX   0 
C9    1    0.642717    0.431376    0.119216    11.00000    0.02626    0.03242 = 
         0.01707    0.00487    0.00082    0.00928 
AFIX 137 
H9A   2    0.633169    0.430282    0.155349    11.00000   -1.50000 
H9B   2    0.667614    0.505014    0.108771    11.00000   -1.50000 
H9C   2    0.698094    0.376067    0.109606    11.00000   -1.50000 
AFIX   0 
C10   1    0.581042    0.206986    0.060944    11.00000    0.04427    0.01712 = 
         0.03195    0.00983    0.01252    0.00898 
AFIX 137 
H10A  2    0.556549    0.145611    0.082064    11.00000   -1.50000 
H10B  2    0.657703    0.226245    0.069177    11.00000   -1.50000 
H10C  2    0.576663    0.184713    0.026008    11.00000   -1.50000 
AFIX   0 
C11   1    0.685376    0.734896    0.084395    11.00000    0.03376    0.02954 = 
         0.04544   -0.00198   -0.01857   -0.00864 
AFIX 137 
H11A  2    0.747594    0.785094    0.090641    11.00000   -1.50000 
H11B  2    0.709373    0.675118    0.062264    11.00000   -1.50000 
H11C  2    0.659822    0.703347    0.115903    11.00000   -1.50000 
AFIX   0 
C12   1    0.631397    0.922194    0.013467    11.00000    0.04604    0.02173 = 
         0.03813   -0.00445    0.00185   -0.01218 
AFIX 137 
H12A  2    0.672702    0.975387    0.033767    11.00000   -1.50000 
H12B  2    0.572257    0.960835   -0.004439    11.00000   -1.50000 
H12C  2    0.681650    0.887248   -0.010423    11.00000   -1.50000 
AFIX   0 
C13   1    0.482642    0.884822    0.102621    11.00000    0.04618    0.02536 = 
         0.03220   -0.01274   -0.00117   -0.00621 
AFIX 137 
H13A  2    0.528024    0.938998    0.120504    11.00000   -1.50000 
H13B  2    0.453799    0.829933    0.126094    11.00000   -1.50000 
H13C  2    0.420745    0.922808    0.086385    11.00000   -1.50000 
AFIX   0 
C14   1    0.351552    0.791031   -0.004981    11.00000    0.02587    0.01442 = 
         0.01735   -0.00424   -0.00564    0.00097 
C15   1    0.358663    0.869893   -0.043102    11.00000    0.03251    0.01858 = 
         0.01943   -0.00082   -0.00458    0.00188 
AFIX  43 
H15A  2    0.424850    0.875697   -0.061987    11.00000   -1.20000 
AFIX   0 
C16   1    0.270279    0.939551   -0.053591    11.00000    0.04482    0.02056 = 
         0.02689    0.00206   -0.01760    0.00354 
AFIX  43 
H16A  2    0.276177    0.991779   -0.079836    11.00000   -1.20000 
AFIX   0 
C17   1    0.174004    0.933527   -0.026218    11.00000    0.03433    0.03193 = 
         0.03598   -0.00738   -0.01319    0.01601 
AFIX  43 
H17A  2    0.113632    0.981294   -0.033470    11.00000   -1.20000 
AFIX   0 
C18   1    0.166273    0.857498    0.011767    11.00000    0.02736    0.04219 = 
         0.02619   -0.00867    0.00006    0.00991 
AFIX  43 
H18A  2    0.100570    0.853544    0.031083    11.00000   -1.20000 
AFIX   0 
C19   1    0.253818    0.786663    0.021999    11.00000    0.03141    0.02731 = 
         0.01733   -0.00233   -0.00117    0.00503 
AFIX  43 
H19A  2    0.246662    0.734065    0.048032    11.00000   -1.20000 
  
AFIX   0 
HKLF 4 
  
  
  
  
REM  s1 in P4(3)2(1)2 
REM R1 =  0.0166 for    4330 Fo > 4sig(Fo)  and  0.0212 for all    4691 data 
REM    204 parameters refined using      0 restraints 
  
END 
  
WGHT      0.0102      0.5888 
  
REM Highest difference peak  0.458,  deepest hole -0.315,  1-sigma level  0.059 
Q1    1   0.4630  0.4017  0.0025  11.00000  0.05    0.46 
Q2    1   0.4737  0.4743  0.0773  11.00000  0.05    0.27 
Q3    1   0.4821  0.4359  0.1086  11.00000  0.05    0.27 
Q4    1   0.4834  0.6378  0.0185  11.00000  0.05    0.27 
Q5    1   0.5886  0.4146  0.1005  11.00000  0.05    0.25 
Q6    1   0.4126  0.7538 -0.0004  11.00000  0.05    0.24 
Q7    1   0.3187  0.4434  0.0751  11.00000  0.05    0.23 
Q8    1   0.4606  0.3529  0.0498  11.00000  0.05    0.22 
Q9    1   0.5376  0.4219  0.0777  11.00000  0.05    0.22 
Q10   1   0.1984  0.8053  0.0103  11.00000  0.05    0.22 
Q11   1   0.2964  0.7746  0.0004  11.00000  0.05    0.22 
Q12   1   0.5320  0.6818  0.0722  11.00000  0.05    0.21 
Q13   1   0.7022  0.7553  0.1147  11.00000  0.05    0.21 
Q14   1   0.4445  0.6379 -0.0003  11.00000  0.05    0.21 
Q15   1   0.4639  0.3205  0.0025  11.00000  0.05    0.21 
Q16   1   0.4218  0.4931  0.1166  11.00000  0.05    0.21 
Q17   1   0.3609  0.3610  0.0543  11.00000  0.05    0.21 
Q18   1   0.3057  0.6427  0.0178  11.00000  0.05    0.20 
Q19   1   0.3557  0.8352 -0.0141  11.00000  0.05    0.20 
Q20   1   0.3847  0.4329  0.0942  11.00000  0.05    0.20 
; 
_shelx_res_checksum   73470 
  
_shelx_hkl_file 
; 
  -1  -1   0  494.53   27.74 
   2   1   0   62.97    3.89 
   2   1   0   60.80    3.82 
   2   1   0   63.42    3.91 
  -1   2   0   65.22    3.93 
   1  -2   0   65.42    3.91 
   1  -2   0   64.16    3.81 
   1  -2   0   64.97    3.85 
   1  -2   0   61.51    3.92 
  -1   2   0   68.92    3.88 
  -1   2   0   58.75    3.90 
  -1   2   0   66.93    3.82 
  -2  -1   0   64.63    3.90 
  -2  -1   0   69.35    3.84 
  -2  -1   0   68.23    3.95 
  -2  -1   0   62.97    3.88 
   0   2   0  354.72   20.08 
  -2   0   0  359.45   20.09 
   0  -2   0  371.77   20.08 
   0  -2   0  355.05   20.12 
   2   0   0  347.41   19.95 
   0   2   0  354.62   20.08 
  -2   0   0  341.16   20.10 
  -2   0   0  342.06   19.99 
  -2   0   0  362.78   19.95 
   2   0   0  355.62   20.00 
   0   2   0  345.07   19.86 
   0   2   0  376.68   20.14 
   2   0   0  356.13   20.09 
   2   0   0  372.31   20.14 
   0  -2   0  346.22   20.07 
   0  -2   0  352.78   19.86 
  -1  -2   0   67.30    3.94 
   1   2   0   62.94    3.90 
  -2   1   0   64.77    3.91 
   2  -1   0   63.17    3.88 
   2  -1   0   63.80    3.92 
   2  -1   0   64.14    3.76 
  -1  -2   0   69.63    3.69 
  -1  -2   0   63.94    3.91 
   2  -1   0   64.08    3.79 
  -2   1   0   59.65    3.75 
  -2   1   0   61.94    3.87 
   1   2   0   64.03    3.92 
   1   2   0   65.96    3.92 
  -2   1   0   60.57    3.78 
  -1  -2   0   62.98    3.89 
   2  -2   0  187.42   10.41 
  -2  -2   0  176.24   10.40 
  -2   2   0  168.61   10.25 
   2  -2   0  178.32   10.35 
   2  -2   0  188.38   10.27 
  -2  -2   0  170.75   10.24 
  -2  -2   0  183.37   10.43 
  -2  -2   0  172.56   10.36 
   2   2   0  184.15   10.43 
   2   2   0  171.03   10.40 
   2  -2   0  176.67   10.36 
  -2   2   0  180.26   10.35 
  -2   2   0  200.44   10.40 
   2   2   0  174.43   10.25 
  -2   3   0    2.53    0.65 
   2  -3   0    2.82    0.55 
  -3  -2   0    2.44    0.54 
   3   2   0    2.60    0.58 
  -2   3   0    2.42    0.56 
  -3  -2   0    3.35    0.67 
   3   2   0    2.18    0.51 
  -3  -2   0    3.31    0.65 
   2  -3   0    2.65    0.56 
   2  -3   0    2.84    0.65 
   3   2   0    2.80    0.65 
  -3  -2   0    2.01    0.57 
  -2   3   0    4.17    0.65 
  -2   3   0    2.57    0.57 
  -3  -2   0    3.03    0.53 
   1  -3   0  445.15   26.00 
  -1   3   0  460.28   26.22 
  -3  -1   0  507.04   26.26 
  -3  -1   0  476.48   26.17 
   1  -3   0  467.64   26.15 
   3   1   0  459.99   26.23 
   3   1   0  481.07   26.07 
  -1   3   0  464.10   26.26 
   1  -3   0  469.67   26.21 
  -3  -1   0  429.84   26.03 
  -3  -1   0  465.70   26.21 
   1  -3   0  459.95   26.26 
  -1   3   0  435.42   26.14 
  -1   3   0  461.87   26.01 
   3   0   0    0.11    0.26 
   0  -3   0    0.37    0.41 
   0   3   0   -0.03    0.16 
  -3   0   0    0.03    0.40 
   0  -3   0    0.21    0.40 
   0  -3   0    0.09    0.14 
   0  -3   0    0.24    0.38 
  -3   0   0    0.32    0.31 
   0   3   0   -0.52    0.36 
   0   3   0   -0.19    0.38 
   3   0   0   -0.03    0.31 
   0   3   0    0.37    0.35 
  -3   0   0    0.11    0.27 
   3   0   0   -0.57    0.35 
   3   0   0    0.27    0.29 
  -3   0   0    0.02    0.37 
  -1  -3   0  450.75   25.70 
  -1  -3   0  463.56   26.07 
   3  -1   0  437.76   25.87 
  -3   1   0  475.10   25.91 
  -3   1   0  438.02   26.04 
  -1  -3   0  467.96   26.13 
  -1  -3   0  445.11   25.71 
   3  -1   0  486.56   26.16 
  -3   1   0  487.76   26.14 
  -3   1   0  447.47   25.89 
   3  -1   0  460.84   26.07 
   1   3   0  479.51   26.14 
   3  -1   0  448.34   25.89 
   1   3   0  452.60   26.08 
  -1  -3   0  477.73   26.10 
   1   3   0  448.02   26.09 
   2   3   0    2.48    0.61 
   3  -2   0    3.71    0.59 
   2   3   0    2.57    0.63 
   2   3   0    2.87    0.49 
   2   3   0    3.21    0.66 
  -2  -3   0    3.30    0.49 
   3  -2   0    2.76    0.55 
  -2  -3   0    1.87    0.60 
  -2  -3   0    2.39    0.58 
   3  -2   0    3.56    0.70 
  -3   2   0    3.02    0.53 
  -3   2   0    3.23    0.60 
  -3   2   0    2.38    0.50 
  -3   2   0    2.21    0.57 
   3  -3   0  121.40    6.91 
  -3  -3   0  112.93    6.84 
  -3  -3   0  115.83    6.67 
   3   3   0  109.71    6.66 
  -3   3   0  105.45    6.99 
  -3   3   0  106.14    6.67 
   3  -3   0  115.52    6.68 
  -3   3   0  108.76    6.82 
  -3   3   0  109.47    6.85 
   3   3   0  111.25    6.90 
  -3  -3   0  116.28    6.90 
   3  -3   0  112.66    6.81 
  -3  -3   0  120.17    6.93 
   3   3   0  108.96    6.89 
  -3   4   0   35.79    2.67 
   3  -4   0   38.00    2.69 
  -3   4   0   32.54    3.13 
   3  -4   0   37.00    2.49 
   4   3   0   33.65    2.61 
   4   3   0   32.34    2.48 
   3  -4   0   28.72    2.46 
   4   3   0   33.07    2.64 
  -4  -3   0   36.28    2.65 
  -4  -3   0   36.88    2.72 
  -4  -3   0   37.94    2.59 
  -4  -3   0   30.92    2.46 
  -3   4   0   35.65    2.49 
  -3   4   0   32.59    2.52 
   3  -4   0   36.56    2.67 
  -4  -2   0  130.53    7.76 
   2  -4   0  133.64    7.79 
  -4  -2   0  132.36    7.77 
  -2   4   0  125.27    7.57 
  -4  -2   0  123.81    7.77 
  -4  -2   0  120.75    7.90 
  -4  -2   0  137.95    7.62 
  -2   4   0  133.94    7.85 
   2  -4   0  142.41    7.72 
  -2   4   0  131.34    7.83 
   2  -4   0  126.43    7.58 
   4   2   0  116.69    7.74 
   2  -4   0  123.84    7.80 
   4   2   0  125.85    7.75 
  -2   4   0  120.37    7.66 
   1  -4   0    1.11    0.34 
  -1   4   0    0.16    0.46 
  -1   4   0    0.34    0.45 
  -1   4   0   -0.19    0.39 
   1  -4   0    0.51    0.43 
   1  -4   0    0.87    0.59 
   4   1   0    0.53    0.47 
   4   1   0    1.01    0.35 
  -4  -1   0    0.41    0.43 
   1  -4   0    1.23    0.53 
  -4  -1   0    0.90    0.48 
  -4  -1   0    2.13    0.56 
  -4  -1   0    0.56    0.39 
  -4  -1   0    1.57    0.49 
  -1   4   0    0.71    0.33 
   0  -4   0  197.81   11.23 
   0  -4   0  195.04   11.66 
   0  -4   0  201.10   11.67 
   0   4   0  196.51   11.69 
  -4   0   0  195.19   11.51 
   0   4   0  205.57   11.79 
   0   4   0  206.43   11.25 
   4   0   0  215.88   11.77 
   4   0   0  190.49   11.75 
   0   4   0  189.52   11.68 
   0  -4   0  193.38   11.75 
   4   0   0  200.54   11.54 
   4   0   0  203.26   11.44 
  -4   0   0  199.86   11.69 
  -4   0   0  197.33   11.73 
  -4   0   0  206.85   11.43 
  -1  -4   0    0.98    0.51 
   1   4   0    1.25    0.63 
  -1  -4   0    1.19    0.18 
   4  -1   0    0.64    0.47 
  -1  -4   0    0.73    0.62 
   4  -1   0    1.26    0.39 
   4  -1   0    1.03    0.38 
  -1  -4   0    1.37    0.20 
   4  -1   0    0.54    0.50 
  -4   1   0    1.11    0.52 
  -4   1   0    1.02    0.41 
  -4   1   0    1.25    0.39 
   1   4   0    0.75    0.52 
   1   4   0    1.61    0.57 
  -4   1   0    0.45    0.42 
  -1  -4   0    1.92    0.59 
   2   4   0  124.68    7.88 
  -4   2   0  132.95    7.68 
   2   4   0  131.08    7.91 
  -4   2   0  124.72    7.83 
   4  -2   0  132.41    7.93 
   4  -2   0  126.49    7.84 
   4  -2   0  128.68    7.60 
  -2  -4   0  137.95    7.43 
   4  -2   0  129.84    7.64 
  -2  -4   0  123.18    7.87 
  -2  -4   0  127.35    7.44 
  -2  -4   0  134.76    7.87 
  -4   2   0  125.46    7.59 
  -4   2   0  122.36    7.85 
   2   4   0  134.83    7.95 
  -2  -4   0  132.25    7.90 
  -4   3   0   31.36    2.55 
  -3  -4   0   31.24    2.62 
   3   4   0   32.00    2.68 
   4  -3   0   36.32    2.68 
  -3  -4   0   36.36    2.73 
  -3  -4   0   34.45    2.32 
  -3  -4   0   37.58    2.70 
   4  -3   0   32.02    2.52 
   3   4   0   36.06    2.34 
   4  -3   0   33.56    2.63 
  -4   3   0   37.69    2.67 
   3   4   0   35.06    2.67 
  -4   3   0   35.18    2.43 
  -4  -4   0  206.04   12.55 
  -4   4   0  213.99   12.56 
  -4  -4   0  224.37   12.57 
   4   4   0  214.38   12.74 
  -4  -4   0  203.94   12.60 
  -4  -4   0  207.88   12.64 
   4  -4   0  236.75   12.65 
  -4   4   0  213.16   12.38 
  -4   4   0  196.64   12.63 
  -4   4   0  216.21   12.56 
   4  -4   0  220.28   12.65 
   4   4   0  203.15   12.34 
   4  -4   0  205.84   12.33 
   4  -4   0  203.44   12.50 
  -4  -4   0  208.74   12.32 
   4   4   0  216.69   12.76 
  -5  -4   0  214.41   12.74 
   5   4   0  210.32   12.48 
  -5  -4   0  203.86   12.98 
  -5  -4   0  209.36   12.70 
  -4   5   0  220.10   12.58 
   4  -5   0  200.81   12.66 
  -4   5   0  212.93   12.65 
   4  -5   0  235.53   12.48 
  -5  -4   0  219.60   12.48 
   5   4   0  204.73   12.76 
  -4   5   0  198.41   12.75 
   4  -5   0  219.09   12.71 
  -5  -4   0  196.22   12.47 
   3  -5   0   98.52    6.06 
   3  -5   0  101.30    6.25 
  -5  -3   0   98.45    6.27 
   5   3   0   93.27    6.34 
  -5  -3   0   90.27    6.08 
  -5  -3   0   98.25    6.28 
  -3   5   0   97.59    6.03 
   3  -5   0  100.04    6.06 
  -5  -3   0   91.09    6.01 
   5   3   0   89.05    6.12 
   3  -5   0   95.04    6.35 
  -3   5   0  104.17    6.43 
  -3   5   0  100.57    6.13 
  -5  -3   0  100.42    6.16 
  -3   5   0  100.96    6.30 
  -5  -2   0    2.08    0.72 
   2  -5   0    1.97    0.53 
  -5  -2   0    2.43    0.76 
   5   2   0    0.94    0.59 
  -5  -2   0    2.51    0.71 
  -2   5   0    3.35    1.13 
  -2   5   0    3.08    0.81 
   2  -5   0    1.41    0.99 
  -2   5   0    2.68    0.56 
   2  -5   0    2.56    0.74 
  -5  -2   0    3.24    0.88 
   2  -5   0    2.09    0.75 
  -5  -2   0    1.43    0.65 
  -2   5   0    3.71    0.95 
  -5  -1   0  160.34    8.56 
  -1   5   0  145.77    8.57 
  -1   5   0  122.85    8.76 
   5   1   0  115.38    8.09 
  -5  -1   0  139.94    8.15 
  -5  -1   0  142.21    8.31 
  -5  -1   0  135.33    8.53 
  -1   5   0  143.11    8.02 
  -5  -1   0  147.69    8.47 
   1  -5   0  145.22    8.45 
   1  -5   0  129.97    8.93 
   1  -5   0  145.54    8.40 
  -1   5   0  132.69    8.38 
   1  -5   0  137.96    8.01 
   5   1   0  134.05    8.55 
   0  -5   0   -0.51    0.47 
   5   0   0   -0.26    0.49 
   0   5   0    0.67    0.24 
   0   5   0    0.29    0.65 
  -5   0   0    0.22    0.61 
   0  -5   0   -0.67    0.53 
  -5   0   0    0.15    0.43 
   5   0   0   -0.56    0.40 
  -5   0   0   -0.65    0.36 
   5   0   0    0.39    0.39 
   0   5   0   -0.09    0.61 
  -5   0   0    0.56    0.52 
   0  -5   0    0.80    1.57 
   0  -5   0   -0.05    0.19 
  -5   1   0  143.73    8.58 
  -5   1   0  137.04    8.24 
  -1  -5   0  147.79    8.55 
   1   5   0  139.41    8.59 
   5  -1   0  145.60    8.53 
   5  -1   0  139.91    8.17 
  -1  -5   0  134.13    8.67 
  -5   1   0  144.84    8.21 
   5  -1   0  128.60    8.65 
   1   5   0  124.47    8.60 
  -1  -5   0  145.45    8.50 
  -5   2   0    2.30    0.66 
  -5   2   0    1.68    0.87 
  -5   2   0    3.55    0.72 
   5  -2   0    4.59    1.29 
  -2  -5   0    2.52    1.15 
   5  -2   0    1.86    0.61 
   5  -2   0    2.69    0.74 
  -2  -5   0    2.67    0.43 
  -2  -5   0    3.00    0.87 
   2   5   0    2.27    1.17 
  -2  -5   0    2.18    0.40 
  -5   2   0    1.44    0.94 
   5  -2   0    2.40    0.64 
  -2  -5   0    2.79    0.88 
   2   5   0    2.75    0.88 
   2   5   0    2.42    1.17 
  -3  -5   0   95.93    6.41 
   3   5   0  103.01    6.64 
  -5   3   0  101.43    6.11 
  -3  -5   0   99.19    5.89 
  -3  -5   0   92.67    6.50 
  -3  -5   0  101.77    6.41 
  -5   3   0  107.45    6.45 
   5  -3   0  103.64    6.19 
   3   5   0   91.62    6.51 
   5  -3   0   97.35    6.57 
   5  -3   0  101.39    6.39 
  -5   3   0  103.08    6.23 
  -5   3   0   98.95    6.50 
  -3  -5   0   98.48    5.92 
   5  -3   0  100.95    6.08 
   3   5   0   94.49    6.39 
  -5   4   0  223.30   12.70 
   4   5   0  215.11   12.97 
  -4  -5   0  210.53   12.38 
  -4  -5   0  224.58   12.91 
  -4  -5   0  211.08   12.83 
   5  -4   0  199.68   12.90 
   5  -4   0  215.13   12.82 
  -4  -5   0  201.88   12.86 
   5  -4   0  216.31   12.92 
  -5   4   0  207.02   12.49 
  -5   4   0  210.29   12.78 
   4   5   0  211.11   12.95 
   5  -4   0  212.49   12.48 
  -5   4   0  229.68   12.96 
  -5   5   0  137.02    8.45 
   5  -5   0  136.96    8.60 
  -5  -5   0  127.11    8.40 
   5   5   0  135.04    8.21 
   5  -5   0  138.08    8.21 
  -5  -5   0  138.78    8.63 
  -5   5   0  125.65    8.68 
   5  -5   0  139.38    8.55 
  -5   5   0  140.12    8.45 
  -5  -5   0  127.22    8.54 
  -5  -5   0  134.43    8.17 
   5   5   0  138.13    8.79 
   5   5   0  130.56    8.72 
  -5   5   0  137.37    8.33 
   5  -5   0  132.57    8.51 
   5  -6   0  124.86    7.60 
  -6  -5   0  118.53    7.95 
  -6  -5   0  114.58    7.73 
  -6  -5   0  117.35    7.89 
  -5   6   0  121.32    7.78 
  -6  -5   0  124.82    7.65 
  -5   6   0  132.15    8.26 
  -5   6   0  119.66    7.91 
   5  -6   0  127.17    8.09 
   5  -6   0  124.82    7.95 
   6   5   0  123.96    7.84 
  -6  -5   0  126.34    8.01 
   6   5   0  117.30    8.13 
  -5   6   0  116.08    7.72 
   5  -6   0  121.72    7.96 
  -6  -4   0   14.32    2.01 
  -6  -4   0   14.40    2.06 
   6   4   0   16.43    2.37 
  -6  -4   0   12.50    1.78 
   6   4   0   15.75    2.30 
   4  -6   0   14.41    1.96 
   4  -6   0   16.45    2.16 
   4  -6   0   18.16    2.44 
  -4   6   0   15.58    1.75 
  -4   6   0   13.40    2.06 
  -4   6   0   15.54    2.55 
  -6  -4   0   15.46    2.15 
   4  -6   0   16.83    1.76 
  -6  -4   0   15.78    1.80 
  -4   6   0   13.72    2.17 
  -6  -3   0   13.34    1.57 
  -3   6   0   12.56    1.41 
  -3   6   0    9.55    1.78 
   6   3   0    8.59    1.65 
   3  -6   0   12.19    1.42 
  -6  -3   0    9.90    1.75 
  -3   6   0   12.96    1.79 
  -6  -3   0   12.20    1.50 
   3  -6   0   14.98    1.54 
   3  -6   0   12.28    2.02 
  -3   6   0   10.91    1.83 
  -6  -3   0   14.22    1.67 
   3  -6   0   10.36    1.63 
  -6  -3   0   13.97    1.57 
  -6  -3   0   12.49    1.83 
   2  -6   0  112.96    7.17 
  -6  -2   0  118.83    7.56 
  -6  -2   0  125.98    7.40 
  -2   6   0  107.77    7.36 
   2  -6   0  120.13    7.31 
   2  -6   0  108.84    7.50 
  -6  -2   0  126.72    7.36 
  -6  -2   0  114.44    7.34 
  -6  -2   0  122.47    7.36 
   2  -6   0  107.45    6.89 
  -2   6   0  111.19    6.91 
  -2   6   0  119.39    7.47 
   6   2   0  111.45    7.47 
  -2   6   0  112.43    7.45 
  -6  -2   0  116.11    7.03 
   6   1   0    1.66    1.21 
  -1   6   0    1.62    1.17 
   1  -6   0    1.64    0.81 
  -1   6   0    2.96    0.88 
  -6  -1   0    2.01    0.84 
   1  -6   0    1.56    1.14 
   1  -6   0    1.72    0.82 
  -6  -1   0    1.24    1.12 
  -1   6   0    2.31    0.47 
  -6  -1   0    2.54    0.75 
  -6  -1   0    1.49    0.74 
   1  -6   0    2.11    0.46 
  -6  -1   0    2.13    0.83 
  -1   6   0    2.00    1.12 
   6   1   0    2.01    0.58 
   0  -6   0   73.80    4.37 
   0  -6   0   80.49    5.13 
  -6   0   0   79.41    4.75 
   0   6   0   76.00    5.24 
   0  -6   0   75.73    5.08 
   0  -6   0   74.48    5.40 
   6   0   0   82.00    4.94 
  -6   0   0   77.20    4.87 
   6   0   0   74.77    5.40 
  -6   0   0   74.45    5.26 
  -6   0   0   78.14    5.14 
   0   6   0   73.10    5.17 
   6   0   0   69.66    4.69 
   0   6   0   80.68    4.40 
   0   6   0   72.38    5.25 
   6  -1   0    2.15    1.30 
   6  -1   0    1.46    0.53 
   1   6   0    1.02    0.82 
  -1  -6   0    2.94    0.87 
  -6   1   0    2.02    1.00 
  -1  -6   0    2.81    1.32 
  -6   1   0    2.03    0.63 
  -1  -6   0    2.12    0.91 
  -6   1   0    2.07    0.78 
   1   6   0    1.99    1.33 
  -6   1   0    2.62    0.74 
   6  -1   0    1.73    0.74 
   1   6   0    2.02    1.18 
   6  -1   0    2.65    0.67 
  -6   2   0  111.61    7.60 
  -6   2   0  118.18    7.66 
  -2  -6   0  118.48    7.61 
   6  -2   0  124.86    7.26 
   2   6   0  119.12    7.69 
   6  -2   0  112.01    7.79 
  -6   2   0  124.36    7.29 
   6  -2   0  124.51    7.23 
  -2  -6   0  121.27    7.58 
  -6   2   0  117.97    7.25 
   2   6   0  121.68    7.78 
   2   6   0  123.45    7.79 
  -2  -6   0  122.77    7.83 
   6  -2   0  112.88    7.49 
  -3  -6   0   11.83    1.05 
  -3  -6   0   14.80    2.28 
   6  -3   0   14.94    1.77 
  -6   3   0   13.67    1.57 
   6  -3   0   12.67    1.44 
   3   6   0   11.57    2.03 
   3   6   0   12.51    2.11 
   6  -3   0   13.46    2.13 
  -3  -6   0   10.57    1.75 
  -3  -6   0   12.18    1.09 
  -6   3   0   12.87    2.00 
  -6   3   0    9.68    1.71 
  -3  -6   0   11.26    1.62 
   6  -3   0   13.15    1.45 
   3   6   0    9.92    1.70 
  -6   3   0   11.89    1.40 
   6  -4   0   18.27    2.16 
   6  -4   0   15.10    1.87 
  -6   4   0   18.39    2.32 
   6  -4   0   18.88    2.69 
  -4  -6   0   16.54    1.46 
  -4  -6   0   14.25    2.09 
  -6   4   0   15.86    2.50 
  -6   4   0   17.32    2.02 
  -4  -6   0   18.80    2.39 
  -6   4   0   17.32    2.11 
  -4  -6   0   14.41    1.49 
   4   6   0   15.98    2.45 
   4   6   0   12.93    2.28 
   6  -4   0   16.49    1.65 
  -4  -6   0   19.24    2.63 
   6  -5   0  126.53    8.09 
  -5  -6   0  119.69    8.01 
  -5  -6   0  113.43    7.84 
  -5  -6   0  117.18    7.90 
  -6   5   0  121.36    7.61 
  -5  -6   0  121.37    7.36 
   6  -5   0  123.10    7.47 
  -6   5   0  119.71    7.76 
   5   6   0  125.18    8.14 
   6  -5   0  122.53    7.80 
   6  -5   0  126.85    7.91 
  -6   5   0  111.64    8.04 
   5   6   0  116.69    8.15 
  -6  -6   0   -0.32    1.16 
  -6  -6   0    1.19    1.21 
   6  -6   0    1.13    0.87 
  -6  -6   0    2.94    1.52 
  -6   6   0    2.12    1.77 
  -6   6   0    2.26    1.29 
  -6   6   0   -0.34    1.04 
   6  -6   0    0.05    1.13 
   6   6   0    1.02    1.39 
  -6  -6   0    0.87    1.46 
   6   6   0    0.22    1.74 
  -6  -6   0    0.60    0.84 
   6  -6   0   -0.28    1.18 
   6  -6   0    0.39    1.48 
  -6   6   0    0.52    1.24 
  -7  -6   0   86.52    6.39 
   6  -7   0   87.08    6.38 
  -7  -6   0   90.53    5.87 
  -6   7   0   84.53    5.99 
  -7  -6   0   85.86    6.25 
  -6   7   0   86.04    6.53 
   7   6   0   85.33    6.53 
  -6   7   0   81.27    6.10 
   7   6   0   88.78    6.12 
   6  -7   0   86.81    6.46 
   6  -7   0   89.81    5.81 
  -7  -6   0   85.46    6.01 
  -6   7   0   84.51    6.21 
  -7  -5   0    8.67    1.83 
  -7  -5   0   14.95    2.36 
  -7  -5   0   11.59    1.83 
  -5   7   0   12.47    2.04 
   5  -7   0    8.43    1.70 
   7   5   0    9.71    2.05 
  -5   7   0    9.45    2.05 
  -7  -5   0    8.74    1.71 
  -5   7   0   10.75    1.85 
   5  -7   0   14.27    2.18 
  -5   7   0   11.85    1.98 
   7   5   0    8.16    1.92 
   5  -7   0   10.10    2.21 
  -7  -5   0    9.13    2.15 
   7   4   0  257.22   16.33 
  -7  -4   0  285.48   16.48 
  -7  -4   0  292.50   16.33 
  -4   7   0  253.92   16.21 
  -7  -4   0  272.78   16.24 
  -7  -4   0  284.18   16.44 
  -7  -4   0  278.91   16.41 
  -4   7   0  265.52   16.49 
   4  -7   0  274.03   16.54 
  -4   7   0  279.77   16.48 
   4  -7   0  279.10   16.15 
  -7  -4   0  273.15   16.06 
  -4   7   0  280.23   16.08 
   4  -7   0  262.43   16.06 
   4  -7   0  259.74   16.28 
  -7  -3   0    0.38    0.89 
  -7  -3   0    0.36    1.10 
   7   3   0    1.54    1.29 
  -7  -3   0    1.81    0.96 
  -7  -3   0    1.32    1.39 
  -3   7   0    0.17    0.63 
   3  -7   0    2.22    0.89 
   3  -7   0    1.09    0.64 
   3  -7   0    0.43    1.39 
  -3   7   0    1.79    1.18 
  -7  -3   0   -0.68    0.94 
  -7  -3   0    1.06    1.07 
  -3   7   0    0.75    1.04 
  -7  -3   0    2.38    1.09 
  -3   7   0    1.15    1.37 
  -7  -2   0   33.39    3.12 
   7   2   0   35.16    2.67 
  -2   7   0   38.05    3.10 
   2  -7   0   33.12    3.50 
  -2   7   0   32.90    3.34 
   2  -7   0   31.87    2.88 
  -7  -2   0   31.41    2.91 
   2  -7   0   35.99    2.88 
   2  -7   0   31.83    2.44 
  -7  -2   0   35.85    3.46 
   7   2   0   34.33    3.38 
  -7  -2   0   35.84    2.67 
  -7  -2   0   36.98    3.04 
  -2   7   0   33.44    2.39 
  -2   7   0   31.31    3.21 
  -7  -1   0   19.92    2.58 
  -1   7   0   17.95    1.38 
   1  -7   0   17.31    2.72 
  -7  -1   0   18.25    2.16 
  -1   7   0   18.64    2.63 
  -7  -1   0   18.93    2.15 
   7   1   0   17.75    2.66 
  -7  -1   0   17.83    1.77 
   1  -7   0   17.18    1.39 
   1  -7   0   16.96    2.03 
   1  -7   0   20.18    2.30 
   7   1   0   19.05    1.70 
  -1   7   0   19.05    2.67 
  -1   7   0   16.32    2.20 
  -7   0   0    0.89    0.66 
   0  -7   0   -0.02    1.23 
   7   0   0    0.86    0.55 
   0  -7   0    1.20    1.04 
  -7   0   0   -0.45    1.02 
   0   7   0   -0.84    0.95 
   7   0   0   -0.37    0.66 
   7   0   0    0.66    1.23 
  -7   0   0    0.06    0.86 
   0   7   0    0.66    1.15 
   0   7   0   -0.79    1.24 
  -7   0   0   -0.13    1.19 
   7  -1   0   21.61    1.76 
   1   7   0   19.58    2.21 
   1   7   0   16.99    2.48 
  -7   1   0   19.75    1.83 
   7  -1   0   18.93    1.86 
  -1  -7   0   18.48    2.80 
  -1  -7   0   19.55    2.07 
  -7   1   0   15.86    2.05 
   7  -1   0   19.17    2.77 
   1   7   0   16.57    2.39 
  -7   1   0   18.49    2.34 
  -7   1   0   17.46    2.27 
   7  -2   0   34.29    2.67 
  -2  -7   0   35.12    3.62 
   2   7   0   34.69    3.38 
  -7   2   0   38.30    3.43 
   2   7   0   30.93    3.02 
  -7   2   0   32.90    3.19 
  -2  -7   0   37.13    3.15 
  -2  -7   0   31.16    3.28 
   2   7   0   36.01    3.41 
   7  -2   0   35.46    3.62 
   7  -2   0   35.26    2.95 
  -7   2   0   36.70    2.75 
  -7   2   0   34.68    3.04 
   7  -2   0   33.81    2.57 
   3   7   0    1.51    1.13 
   7  -3   0    1.06    1.57 
   7  -3   0    2.68    0.72 
   3   7   0    1.98    1.32 
  -3  -7   0    0.92    1.02 
   7  -3   0   -0.98    0.95 
  -7   3   0   -0.45    0.79 
   7  -3   0    1.49    0.81 
  -7   3   0   -1.13    1.24 
  -3  -7   0    1.39    1.41 
  -3  -7   0    0.85    0.36 
  -7   3   0    0.57    1.09 
  -3  -7   0    2.02    1.14 
   3   7   0   -0.13    1.47 
  -3  -7   0    1.02    0.38 
   7  -4   0  275.16   15.98 
   4   7   0  260.62   16.59 
  -7   4   0  261.51   16.04 
  -7   4   0  285.76   16.19 
  -4  -7   0  276.56   15.63 
  -4  -7   0  272.90   16.51 
   7  -4   0  285.81   16.50 
  -4  -7   0  276.74   15.69 
   7  -4   0  270.51   16.12 
   7  -4   0  277.52   16.71 
   4   7   0  279.21   16.59 
  -4  -7   0  263.66   16.56 
  -7   4   0  274.13   16.49 
  -7   4   0  266.23   16.48 
  -4  -7   0  272.21   16.46 
   4   7   0  280.55   16.75 
   5   7   0   10.90    2.45 
   7  -5   0   10.98    1.95 
   7  -5   0    9.72    1.62 
   7  -5   0   12.86    2.35 
  -5  -7   0   10.82    1.47 
  -5  -7   0   11.12    1.50 
  -5  -7   0   12.80    2.08 
   7  -5   0   14.53    2.18 
  -7   5   0   12.95    2.05 
   5   7   0    9.47    2.16 
  -7   5   0   13.71    1.97 
  -5  -7   0   17.20    2.48 
  -7   5   0   12.72    2.43 
  -7   5   0   11.67    1.77 
  -5  -7   0   11.85    2.39 
   6   7   0   95.68    6.91 
   7  -6   0   82.21    6.52 
   7  -6   0   91.79    6.30 
  -6  -7   0   85.47    6.50 
  -7   6   0   77.23    6.03 
  -7   6   0   95.04    6.10 
  -6  -7   0   78.34    6.12 
  -6  -7   0   72.40    6.10 
   7  -6   0   91.63    5.82 
  -7   6   0   82.72    6.05 
  -6  -7   0   87.29    5.62 
   6   7   0   94.14    6.74 
  -6  -7   0   87.54    6.31 
  -7   6   0   85.85    6.49 
  -7   7   0    4.06    1.71 
  -7  -7   0    6.89    1.77 
  -7   7   0    4.99    1.82 
  -7   7   0    6.32    1.57 
   7  -7   0    5.90    1.25 
   7  -7   0    4.65    1.93 
   7   7   0    2.74    2.19 
   7  -7   0    5.92    2.23 
  -7  -7   0    5.77    1.31 
  -7   7   0    7.83    2.48 
  -7  -7   0    6.10    2.08 
   8   7   0  168.38   10.97 
  -7   8   0  173.42   11.05 
  -8  -7   0  151.47   10.24 
  -7   8   0  155.88   10.32 
  -8  -7   0  156.31   10.70 
  -8  -7   0  158.09   10.66 
  -8  -7   0  159.68   10.06 
   7  -8   0  161.00   10.63 
   7  -8   0  164.91   10.63 
   7  -8   0  147.04    9.90 
  -7   8   0  152.91   10.22 
  -8  -6   0    1.18    1.34 
   6  -8   0    1.34    1.73 
  -6   8   0    0.48    2.00 
  -8  -6   0    0.28    1.91 
  -8  -6   0    2.20    1.72 
   6  -8   0   -1.16    1.30 
  -6   8   0    4.05    2.06 
   8   6   0   -0.07    1.46 
   8   6   0    2.56    2.10 
  -8  -6   0    1.62    1.45 
  -6   8   0    0.08    1.30 
  -6   8   0   -0.24    1.54 
   6  -8   0    0.71    1.68 
  -5   8   0  204.27   12.12 
  -8  -5   0  196.47   12.53 
  -5   8   0  184.36   12.44 
  -5   8   0  201.88   12.43 
  -8  -5   0  195.94   12.38 
   5  -8   0  205.19   12.75 
  -5   8   0  210.78   12.85 
  -8  -5   0  189.05   12.48 
   8   5   0  194.20   12.47 
  -8  -5   0  206.67   12.50 
  -8  -5   0  195.87   12.22 
   5  -8   0  205.77   12.12 
   5  -8   0  191.07   12.24 
  -4   8   0   -0.10    1.60 
  -8  -4   0   -0.81    1.08 
  -8  -4   0    0.95    1.33 
  -8  -4   0    1.51    1.58 
   4  -8   0   -1.05    1.10 
   4  -8   0   -0.69    1.17 
  -4   8   0    0.45    1.46 
   8   4   0    0.74    1.48 
  -8  -4   0    1.30    1.35 
   4  -8   0    0.46    1.37 
  -8  -4   0   -1.04    1.23 
  -8  -4   0    0.33    1.52 
  -4   8   0    2.02    1.68 
  -4   8   0    0.89    0.88 
   8   3   0  132.41    8.94 
  -3   8   0  133.72    8.10 
  -8  -3   0  140.18    8.72 
  -8  -3   0  134.11    8.51 
   3  -8   0  126.72    8.99 
  -8  -3   0  134.02    8.66 
   3  -8   0  125.22    8.55 
   3  -8   0  150.24    8.54 
  -3   8   0  142.21    8.83 
  -8  -3   0  129.66    8.63 
   3  -8   0  132.36    8.12 
  -8  -3   0  125.97    8.87 
  -8  -3   0  139.38    8.27 
  -8  -3   0  121.73    8.62 
  -3   8   0  130.70    8.96 
  -3   8   0  129.43    8.85 
  -8  -2   0    1.65    1.36 
   2  -8   0   -0.82    1.04 
  -8  -2   0   -0.12    0.75 
   2  -8   0    1.83    1.62 
  -2   8   0    0.37    0.55 
  -8  -2   0   -0.09    1.36 
  -8  -2   0    2.96    1.26 
   8   2   0    1.09    1.56 
   2  -8   0    0.91    1.07 
  -2   8   0   -0.59    1.37 
  -2   8   0   -0.49    1.28 
   2  -8   0    0.16    0.55 
  -2   8   0    2.00    1.60 
  -8  -2   0   -0.46    1.17 
  -1   8   0    0.76    1.32 
   8   1   0   -0.58    1.52 
  -1   8   0   -0.89    1.27 
   8   1   0    0.88    0.64 
  -8  -1   0   -0.26    1.36 
   1  -8   0   -0.91    1.47 
  -8  -1   0    1.08    1.22 
  -1   8   0    0.11    0.43 
  -8  -1   0    0.01    0.70 
  -8  -1   0    1.52    1.13 
   1  -8   0    0.07    0.42 
  -8  -1   0   -0.04    1.19 
   1  -8   0   -0.42    1.00 
  -1   8   0    1.36    1.53 
   1  -8   0    0.46    1.08 
   8   0   0   49.94    3.44 
   8   0   0   47.02    3.65 
   0  -8   0   51.10    4.63 
  -8   0   0   50.58    3.50 
  -8   0   0   50.13    4.35 
   0  -8   0   49.92    3.92 
   0   8   0   49.02    4.00 
  -8   0   0   49.40    3.88 
   8   0   0   45.50    4.46 
   0   8   0   51.42    4.49 
   0  -8   0   52.51    3.97 
   0   8   0   44.90    4.26 
  -8   0   0   44.97    3.83 
  -8   1   0   -0.10    1.36 
   1   8   0    0.23    1.39 
   8  -1   0    2.16    0.80 
   1   8   0    0.18    1.50 
  -8   1   0    0.63    1.04 
  -1  -8   0    3.23    1.17 
   8  -1   0    2.77    1.15 
  -8   1   0    0.52    1.10 
  -1  -8   0    0.46    1.06 
   8  -1   0    0.73    0.64 
  -1  -8   0   -0.59    1.45 
   8  -1   0    0.06    1.49 
  -8   1   0   -0.82    0.69 
   1   8   0   -0.38    1.27 
  -8   2   0   -1.13    1.15 
   8  -2   0    0.38    0.68 
  -8   2   0    1.44    0.89 
   8  -2   0    0.91    1.61 
   2   8   0   -0.48    1.47 
  -2  -8   0    1.02    1.55 
  -8   2   0    1.28    1.19 
  -8   2   0    0.46    1.50 
   2   8   0    0.49    1.62 
   2   8   0   -1.22    1.21 
   8  -2   0    0.83    0.76 
   8  -2   0    2.60    1.22 
  -2  -8   0    0.79    1.19 
  -2  -8   0    1.59    1.19 
  -8   3   0  133.04    8.22 
   3   8   0  138.91    9.00 
   8  -3   0  128.42    8.99 
  -3  -8   0  128.95    8.88 
   8  -3   0  138.71    8.08 
  -8   3   0  133.86    8.16 
  -8   3   0  117.86    8.52 
  -3  -8   0  122.50    8.53 
   3   8   0  129.01    8.71 
   8  -3   0  131.37    8.10 
   8  -3   0  120.43    8.44 
  -8   3   0  128.29    8.76 
   3   8   0  140.28    9.02 
  -3  -8   0  125.78    8.50 
   8  -4   0    0.74    1.10 
  -8   4   0    1.13    1.05 
   4   8   0    1.79    2.04 
  -4  -8   0    0.77    0.47 
  -8   4   0    0.28    1.29 
  -4  -8   0    1.42    1.63 
  -4  -8   0   -2.21    1.33 
  -8   4   0   -0.79    1.52 
   4   8   0   -1.03    1.43 
   4   8   0    1.45    1.61 
   8  -4   0    1.37    1.96 
  -8   4   0   -0.78    1.40 
  -4  -8   0    0.69    0.50 
   8  -4   0    1.44    0.87 
   5   8   0  202.58   13.23 
  -8   5   0  203.40   13.06 
   8  -5   0  198.73   12.37 
  -5  -8   0  202.18   13.15 
  -5  -8   0  204.32   12.01 
  -5  -8   0  203.15   12.07 
  -8   5   0  211.22   13.14 
   5   8   0  202.56   13.28 
   8  -5   0  210.71   13.33 
  -8   5   0  228.77   12.67 
   8  -5   0  206.16   12.64 
   8  -6   0    0.37    1.51 
   6   8   0    0.16    2.24 
   6   8   0    1.64    1.94 
   8  -6   0   -0.68    1.08 
  -6  -8   0    2.79    1.93 
  -8   6   0    3.08    1.35 
  -6  -8   0    0.04    0.85 
  -6  -8   0    1.58    0.94 
  -8   6   0    2.51    1.95 
  -8   6   0    3.23    1.69 
   8  -6   0   -0.28    1.94 
   8  -7   0  176.69   10.78 
  -7  -8   0  163.05   11.11 
  -8   7   0  163.11   10.57 
   8  -7   0  189.23   11.30 
   7   8   0  160.81   11.31 
  -7  -8   0  161.99   10.13 
  -8   7   0  156.48   10.66 
   8  -7   0  157.68   10.21 
  -7  -8   0  165.32   10.34 
  -8   7   0  157.51   11.10 
  -8  -8   0    1.70    1.81 
   8   8   0    3.36    2.39 
   8  -8   0    1.73    2.22 
  -8   8   0    2.55    1.91 
   8  -8   0   -0.29    1.93 
  -8  -8   0    1.18    2.15 
   8  -8   0    2.75    1.45 
  -8   8   0   -0.91    2.29 
  -8  -8   0    4.16    1.71 
   8  -9   0  196.05   12.99 
  -9  -8   0  198.05   13.04 
  -9  -8   0  204.87   13.39 
  -8   9   0  188.43   13.15 
  -8   9   0  194.85   12.59 
  -9  -8   0  189.21   12.26 
  -9  -8   0  191.38   12.57 
   9   8   0  202.02   13.31 
   8  -9   0  196.55   12.94 
  -9  -7   0    3.37    2.55 
   9   7   0    1.73    2.13 
   7  -9   0    1.02    1.93 
   7  -9   0    2.30    2.19 
  -9  -7   0    2.66    2.10 
  -7   9   0    4.33    2.32 
  -9  -7   0    2.41    1.84 
  -7   9   0    1.68    2.51 
   6  -9   0  170.81   11.14 
  -9  -6   0  171.61   10.93 
   6  -9   0  168.01   10.79 
  -9  -6   0  160.84   11.05 
   9   6   0  157.24   10.92 
  -6   9   0  157.74   11.26 
  -9  -6   0  160.08   10.62 
  -6   9   0  180.27   10.99 
  -9  -6   0  171.53   10.66 
  -6   9   0  148.26   10.37 
   6  -9   0  174.26   10.89 
  -5   9   0    6.56    2.21 
  -9  -5   0    2.28    1.63 
   5  -9   0    5.04    1.50 
   5  -9   0    2.76    1.71 
  -9  -5   0    3.53    1.91 
   9   5   0    6.39    2.21 
  -9  -5   0    3.19    1.41 
  -5   9   0    3.74    2.19 
   5  -9   0    4.24    2.17 
  -5   9   0    4.96    1.25 
  -9  -5   0    4.95    2.12 
  -4   9   0  105.82    8.05 
   9   4   0  127.12    8.23 
   4  -9   0  110.36    7.41 
   4  -9   0  111.95    8.20 
  -4   9   0  116.99    7.21 
  -9  -4   0  112.05    7.37 
   4  -9   0  108.83    7.45 
  -4   9   0  119.18    8.05 
  -9  -4   0  117.23    7.90 
  -9  -4   0  107.61    7.63 
  -9  -4   0  105.18    7.63 
  -9  -4   0  111.80    8.16 
  -9  -4   0  117.07    8.01 
  -3   9   0    5.17    1.05 
  -9  -3   0    4.78    1.77 
  -9  -3   0    4.00    1.60 
   3  -9   0    7.60    1.58 
  -9  -3   0    7.31    1.28 
  -3   9   0    3.64    2.07 
   3  -9   0    7.63    2.31 
  -9  -3   0    4.19    1.70 
  -9  -3   0    7.86    1.90 
  -9  -3   0    4.49    2.13 
   9   3   0    5.81    2.13 
  -3   9   0    4.78    1.98 
  -9  -2   0   24.99    3.35 
  -9  -2   0   19.13    2.94 
  -9  -2   0   21.99    2.79 
  -2   9   0   20.98    3.23 
   9   2   0   23.27    3.47 
  -9  -2   0   20.51    2.25 
   2  -9   0   16.57    2.61 
  -9  -2   0   21.07    2.82 
   2  -9   0   17.97    3.07 
  -2   9   0   19.01    1.78 
  -2   9   0   21.10    3.41 
   2  -9   0   22.41    1.76 
  -9  -2   0   24.18    3.09 
  -1   9   0    9.74    2.32 
  -1   9   0    8.20    0.91 
  -9  -1   0    9.40    1.82 
  -9  -1   0    9.68    1.61 
  -9  -1   0    9.97    2.00 
  -9  -1   0   10.19    2.41 
   9   1   0    9.30    1.74 
   1  -9   0    4.21    1.46 
  -1   9   0    8.58    2.21 
  -9  -1   0   10.98    2.90 
   9   1   0    7.45    2.47 
  -9  -1   0    6.62    1.77 
   1  -9   0    7.80    2.41 
   0  -9   0   -0.25    1.35 
  -9   0   0   -0.78    1.39 
   0  -9   0   -1.26    1.72 
  -9   0   0   -1.15    1.26 
   0   9   0   -0.45    1.66 
   9   0   0   -1.92    1.74 
   0   9   0   -0.50    1.77 
  -9   0   0   -0.07    0.87 
   0  -9   0    1.33    1.36 
  -9   1   0    7.42    2.23 
   9  -1   0   13.55    1.86 
  -1  -9   0   10.02    2.44 
   9  -1   0    7.23    1.84 
   1   9   0    8.07    2.28 
  -9   1   0    9.59    1.48 
  -1  -9   0    7.04    1.89 
  -9   1   0   10.20    1.90 
   1   9   0    8.95    2.38 
   9  -1   0    9.21    2.59 
   9  -2   0   23.25    2.36 
  -9   2   0   21.32    3.11 
  -2  -9   0   23.49    3.85 
   9  -2   0   23.01    3.83 
   9  -2   0   21.97    2.58 
   2   9   0   23.98    3.52 
  -9   2   0   21.09    2.40 
   2   9   0   21.08    3.20 
  -9   2   0   26.18    2.92 
   3   9   0    7.90    2.21 
  -9   3   0    5.88    1.71 
  -3  -9   0    4.73    2.22 
   9  -3   0    3.83    2.20 
   9  -3   0    6.51    1.46 
  -9   3   0    5.89    2.05 
   3   9   0    7.75    2.40 
   9  -3   0    7.62    1.31 
  -9   3   0    8.19    1.56 
   4   9   0  114.13    8.26 
  -9   4   0  114.42    8.22 
  -4  -9   0  116.98    8.39 
   9  -4   0  109.96    7.33 
   9  -4   0  105.15    8.37 
   4   9   0  120.17    8.31 
   9  -4   0  101.50    7.46 
  -9   4   0  108.85    7.34 
  -9   4   0  115.96    7.48 
  -9   5   0    4.53    1.76 
  -9   5   0    4.86    2.43 
  -5  -9   0    5.73    2.35 
   9  -5   0    3.06    1.67 
   9  -5   0    5.87    2.39 
   5   9   0    4.88    2.46 
  -5  -9   0    5.56    0.89 
  -5  -9   0    5.77    0.91 
   9  -5   0    5.86    1.25 
   5   9   0    6.48    2.43 
  -9   5   0    3.59    1.68 
   9  -6   0  163.07   10.61 
   9  -6   0  165.54   11.42 
  -9   6   0  159.62   11.11 
   6   9   0  164.27   11.38 
   9  -6   0  169.89   10.27 
  -9   6   0  168.43   10.48 
  -6  -9   0  172.05    9.85 
  -6  -9   0  165.49   11.26 
  -6  -9   0  161.32    9.87 
  -9   6   0  155.65   10.60 
   6   9   0  166.18   11.47 
  -9   7   0    2.54    1.96 
   9  -7   0    2.57    2.06 
  -9   7   0    5.45    2.81 
   7   9   0    1.09    2.55 
   7   9   0    3.77    2.77 
   9  -7   0    3.40    1.48 
   9  -7   0   -1.38    2.42 
  -7  -9   0   -0.19    1.64 
  -7  -9   0    2.98    2.54 
  -7  -9   0    2.20    1.28 
   8   9   0  198.44   13.84 
  -8  -9   0  209.21   12.72 
   9  -8   0  194.35   13.17 
   9  -8   0  206.70   13.68 
  -8  -9   0  198.53   12.41 
  -9   8   0  218.45   13.05 
  -9   8   0  205.71   13.78 
  -8  -9   0  199.84   13.54 
  -9  -9   0   -2.70    1.94 
  -9   9   0   -2.51    2.10 
   9  -9   0    1.04    2.74 
   9  -9   0    3.53    2.41 
   9   9   0   -2.26    2.42 
  -9  -9   0    0.30    2.68 
  -9  -9   0    3.97    2.06 
  -9   9   0   -4.40    2.62 
  -9  -9   0    3.99    3.29 
   9 -10   0  137.79   10.54 
  10   9   0  135.93   10.78 
 -10  -9   0  127.12   11.55 
 -10  -9   0  137.48   10.48 
   9 -10   0  140.63   10.38 
 -10  -9   0  140.55   10.06 
  -9  10   0  149.07   10.30 
  -9  10   0  150.77   11.14 
  -8  10   0    1.12    2.42 
 -10  -8   0   -3.29    2.21 
 -10  -8   0    0.06    2.73 
  10   8   0   -0.20    2.37 
   8 -10   0    1.11    2.42 
  -8  10   0   -1.84    2.79 
 -10  -8   0    0.68    2.63 
   8 -10   0    2.50    2.70 
   7 -10   0   94.76    7.37 
 -10  -7   0   90.04    7.52 
  -7  10   0   96.15    8.10 
   7 -10   0   96.07    7.75 
 -10  -7   0   95.40    7.69 
  -7  10   0   96.38    7.42 
  -6  10   0    2.68    2.50 
 -10  -6   0    3.75    2.44 
  10   6   0    1.74    2.31 
   6 -10   0   -1.78    2.14 
 -10  -6   0    2.04    2.10 
  -6  10   0    4.70    1.72 
   6 -10   0    1.50    1.91 
  -6  10   0    2.13    2.23 
 -10  -6   0   -1.42    1.83 
  10   5   0  114.41    8.51 
   5 -10   0  112.87    8.71 
 -10  -5   0  112.74    8.06 
  -5  10   0  128.63    8.44 
 -10  -5   0  107.69    7.71 
  -5  10   0  103.31    8.57 
 -10  -5   0  111.82    8.28 
 -10  -5   0  114.29    8.62 
   5 -10   0  117.88    7.76 
  10   4   0    4.26    2.44 
   4 -10   0    0.71    2.07 
  -4  10   0   -0.63    2.19 
   4 -10   0    2.24    1.45 
 -10  -4   0    1.49    1.72 
 -10  -4   0    0.79    1.39 
 -10  -4   0    0.57    2.21 
 -10  -4   0    1.29    1.97 
  -4  10   0    2.34    2.21 
  -3  10   0  111.42    7.76 
 -10  -3   0   94.33    7.56 
   3 -10   0   97.93    6.27 
 -10  -3   0   94.98    7.25 
  -3  10   0   97.16    6.24 
 -10  -3   0  102.99    6.63 
  10   3   0   98.56    7.72 
 -10  -3   0   99.06    6.94 
  -3  10   0   96.87    7.54 
   3 -10   0  103.73    7.96 
 -10  -2   0    2.99    1.74 
  -2  10   0    0.45    2.07 
 -10  -2   0    0.90    1.86 
   2 -10   0    1.40    2.25 
  -2  10   0    2.74    2.40 
 -10  -2   0   -0.21    1.75 
  -2  10   0    2.31    0.72 
  10   2   0    0.13    1.89 
   2 -10   0    2.12    0.68 
 -10  -2   0    2.65    1.21 
  10   1   0   -1.78    1.09 
 -10  -1   0    0.96    1.49 
  10   1   0    3.94    2.10 
 -10  -1   0    0.34    1.14 
  -1  10   0   -1.53    1.79 
 -10  -1   0   -2.63    1.65 
  -1  10   0    3.27    2.01 
   1 -10   0    0.75    2.05 
 -10  -1   0    2.01    1.62 
 -10   0   0    6.89    1.87 
  10   0   0    3.60    2.43 
 -10   0   0    3.94    2.26 
 -10   0   0    7.96    1.48 
  10   0   0    5.10    1.48 
   0 -10   0    6.38    2.67 
   0  10   0    7.03    2.45 
   0  10   0    4.29    2.38 
  10  -1   0    0.86    1.20 
  -1 -10   0    1.06    2.27 
 -10   1   0   -0.62    1.36 
  10  -1   0    0.89    1.26 
 -10   1   0   -0.08    1.22 
 -10   1   0    2.18    1.89 
  10  -1   0   -1.63    2.09 
   1  10   0   -1.46    1.66 
   1  10   0   -0.63    2.08 
  -2 -10   0    0.14    2.10 
 -10   2   0    1.77    1.72 
  10  -2   0    0.71    1.19 
 -10   2   0    1.38    2.04 
   2  10   0    1.23    2.01 
   2  10   0   -0.07    2.02 
  10  -2   0    1.91    1.26 
 -10   2   0    1.64    1.26 
  10  -2   0   -0.52    2.15 
  10  -3   0  109.47    8.23 
  10  -3   0  101.15    6.68 
  -3 -10   0   95.58    7.98 
 -10   3   0   99.41    7.77 
 -10   3   0   97.62    6.94 
 -10   3   0  106.86    6.88 
   3  10   0   91.64    7.80 
   3  10   0  102.93    7.89 
  10  -3   0  100.95    6.71 
  10  -4   0    0.91    1.24 
   4  10   0    0.20    2.54 
  10  -4   0    0.47    2.37 
   4  10   0   -1.01    2.19 
 -10   4   0    0.48    1.67 
  -4 -10   0    2.58    2.26 
  10  -4   0    3.61    1.50 
 -10   4   0    2.71    2.12 
  10  -5   0  116.35    7.62 
   5  10   0  111.09    8.90 
  10  -5   0  107.55    7.32 
   5  10   0  108.66    8.68 
 -10   5   0  114.30    7.76 
 -10   5   0  110.97    7.68 
  10  -5   0  102.86    8.75 
 -10   5   0  110.43    8.58 
  -5 -10   0  122.65    8.90 
  10  -6   0    3.54    1.50 
   6  10   0    0.51    2.53 
  10  -6   0    0.27    2.70 
  -6 -10   0    1.53    0.81 
  10  -6   0    3.42    1.84 
 -10   6   0   -0.11    1.88 
 -10   6   0   -2.22    2.17 
  -6 -10   0    0.45    2.44 
   6  10   0   -1.83    2.63 
 -10   6   0    2.07    1.96 
  -6 -10   0    2.08    0.90 
  10  -7   0   98.22    6.63 
  10  -7   0   93.50    7.17 
  10  -7   0  100.58    8.23 
  -7 -10   0   94.47    6.10 
   7  10   0   97.54    8.34 
  -7 -10   0   86.63    8.03 
 -10   7   0   91.64    8.25 
 -10   7   0   82.76    7.00 
   7  10   0   99.92    8.40 
  -7 -10   0   98.25    6.13 
  10  -8   0    1.60    2.28 
   8  10   0    0.96    2.68 
 -10   8   0   -1.83    2.20 
 -10   8   0    0.38    2.98 
  10  -8   0   -0.64    2.86 
  -8 -10   0   -1.04    1.72 
  -8 -10   0    0.74    2.89 
  -9 -10   0  139.90   10.65 
  10  -9   0  151.32   10.96 
   9  10   0  157.13   11.33 
 -10   9   0  134.13   10.02 
  10  -9   0  148.88   10.43 
  -9 -10   0  132.27    9.65 
 -10   9   0  141.96   11.18 
 -10 -10   0   -0.98    2.54 
  10 -10   0    4.29    3.11 
  10 -10   0    0.24    3.25 
 -10 -10   0    4.64    3.57 
  10  10   0   -2.89    3.26 
 -10  10   0    5.47    3.73 
 -10 -10   0   -2.89    3.11 
 -10  10   0   -2.47    2.93 
 -10  11   0   30.08    5.50 
  10 -11   0   31.81    4.86 
  10 -11   0   40.84    6.81 
 -11 -10   0   33.16    5.15 
 -11 -10   0   33.10    4.62 
 -11 -10   0   30.76    5.85 
 -10  11   0   30.65    4.73 
 -11  -9   0    1.76    3.19 
   9 -11   0    6.23    3.46 
  -9  11   0   -2.59    3.43 
  -9  11   0    1.24    3.19 
   9 -11   0   -0.05    2.73 
 -11  -9   0    3.61    3.35 
 -11  -9   0    3.38    3.41 
   8 -11   0   68.98    6.86 
   8 -11   0   67.04    6.52 
 -11  -8   0   60.06    6.68 
 -11  -8   0   51.29    6.34 
  -8  11   0   59.17    6.90 
 -11  -8   0   52.73    6.72 
  -8  11   0   68.47    6.64 
  -7  11   0   -0.71    2.34 
   7 -11   0    0.04    2.49 
   7 -11   0    3.89    2.83 
 -11  -7   0    2.29    2.80 
 -11  -7   0    2.30    2.64 
 -11  -7   0   -2.32    2.58 
 -11  -6   0   63.39    6.01 
 -11  -6   0   63.87    6.26 
 -11  -6   0   56.34    6.35 
  11   6   0   53.04    5.96 
  -6  11   0   49.04    4.65 
   6 -11   0   66.00    5.59 
  -6  11   0   63.47    6.47 
  -6  11   0   59.75    6.19 
   6 -11   0   55.85    6.40 
   5 -11   0    5.89    2.02 
  -5  11   0    8.85    2.80 
 -11  -5   0    6.56    2.02 
  -5  11   0    8.94    2.94 
 -11  -5   0    4.79    2.77 
  11   5   0    5.71    2.65 
 -11  -5   0    7.27    2.65 
 -11  -5   0    4.85    2.20 
   5 -11   0    2.98    2.85 
 -11  -4   0   46.72    4.61 
 -11  -4   0   44.24    5.33 
  -4  11   0   42.31    3.63 
 -11  -4   0   47.08    5.16 
  -4  11   0   46.10    5.46 
 -11  -4   0   50.31    4.29 
   4 -11   0   44.51    5.42 
  -4  11   0   50.45    5.67 
  11   4   0   40.89    5.59 
   4 -11   0   46.33    4.13 
   3 -11   0   14.41    1.81 
   3 -11   0   16.17    3.41 
 -11  -3   0   14.24    3.09 
  -3  11   0   10.68    3.01 
  -3  11   0   10.77    3.15 
 -11  -3   0   14.36    2.44 
 -11  -3   0   10.84    2.65 
  11   3   0   15.38    3.42 
  -3  11   0   10.02    1.71 
 -11  -2   0    7.58    2.34 
  -2  11   0    8.79    2.74 
 -11  -2   0    8.20    1.69 
 -11  -2   0    8.95    2.89 
  -2  11   0    8.48    1.02 
   2 -11   0    7.23    2.71 
  -2  11   0    6.10    2.67 
  11   2   0    9.31    2.95 
  -1  11   0   19.90    3.74 
 -11  -1   0   21.52    2.69 
 -11  -1   0   21.73    3.60 
 -11  -1   0   18.81    2.90 
  11   1   0   22.47    3.79 
 -11  -1   0   21.03    3.61 
  -1  11   0   21.41    3.77 
  11   1   0   19.91    2.89 
   1 -11   0   23.49    3.97 
   0  11   0    1.61    2.04 
   0  11   0   -2.50    2.23 
 -11   0   0   -0.96    1.28 
 -11   0   0    1.06    2.22 
   0 -11   0   -0.68    2.36 
  11   0   0   -0.12    1.32 
 -11   0   0   -0.04    1.78 
  11   0   0    0.30    2.25 
   1  11   0   19.86    3.66 
 -11   1   0   22.14    2.76 
 -11   1   0   24.25    3.69 
  11  -1   0   18.98    2.87 
  -1 -11   0   20.70    3.78 
 -11   1   0   22.62    3.30 
   1  11   0   21.73    3.78 
  11  -1   0   20.97    3.71 
  11  -2   0    6.35    1.64 
 -11   2   0    9.31    2.28 
  -2 -11   0    7.60    3.12 
   2  11   0    6.72    2.82 
 -11   2   0    6.15    1.74 
   2  11   0    9.74    3.18 
  11  -2   0    9.66    1.82 
 -11   2   0    9.39    2.65 
  11  -2   0    5.65    2.56 
  11  -3   0   10.11    1.80 
 -11   3   0   12.92    2.49 
   3  11   0   11.27    3.24 
   3  11   0   11.80    3.18 
  11  -3   0    9.67    3.37 
  11  -3   0   18.40    2.81 
 -11   3   0    9.15    2.91 
 -11   3   0   11.22    2.41 
  -3 -11   0   12.03    3.31 
  11  -4   0   48.09    4.47 
   4  11   0   51.43    5.74 
 -11   4   0   48.58    4.80 
 -11   4   0   52.92    5.56 
  -4 -11   0   44.13    6.13 
 -11   4   0   51.98    4.66 
   4  11   0   49.55    5.81 
  11  -4   0   49.65    4.16 
  11  -5   0    5.70    1.76 
 -11   5   0    7.70    2.29 
  11  -5   0    6.85    2.01 
  11  -5   0    5.59    3.15 
   5  11   0    4.30    2.96 
 -11   5   0    4.20    2.19 
   5  11   0    7.48    3.25 
 -11   5   0    8.62    3.12 
  -5 -11   0    6.38    3.19 
 -11   6   0   63.21    6.76 
  11  -6   0   59.10    6.89 
  11  -6   0   71.70    5.51 
 -11   6   0   65.38    6.40 
   6  11   0   64.85    7.03 
   6  11   0   64.99    7.06 
 -11   6   0   54.14    5.64 
  -6 -11   0   66.96    7.02 
  11  -6   0   63.51    5.54 
  -7 -11   0    1.75    0.98 
  11  -7   0   -1.21    2.20 
 -11   7   0   -0.13    2.11 
   7  11   0   -0.06    2.88 
   7  11   0   -0.92    4.00 
  -7 -11   0    3.38    3.15 
  11  -7   0    1.38    3.07 
 -11   7   0    4.82    3.62 
 -11   8   0   77.89    7.77 
  11  -8   0   61.41    7.29 
  -8 -11   0   63.24    7.28 
 -11   8   0   58.04    6.02 
   8  11   0   63.88    7.59 
  11  -8   0   60.25    6.18 
  11  -9   0   -1.93    3.42 
  -9 -11   0    4.14    3.36 
  -9 -11   0   -1.71    2.18 
 -11   9   0   -3.92    3.24 
  11  -9   0   -2.87    2.68 
 -11   9   0   -5.12    2.67 
   9  11   0   -0.35    3.37 
 -10 -11   0   36.25    6.26 
 -11  10   0   34.87    4.90 
  10  11   0   34.60    5.72 
  11 -10   0   39.97    6.58 
 -11  10   0   27.63    5.41 
  11 -10   0   36.02    5.81 
 -11 -11   0   -0.96    4.16 
  11 -11   0   -5.11    3.98 
 -11 -11   0   -1.31    4.49 
  11 -11   0   -2.35    4.30 
 -11  11   0   -2.20    3.49 
 -11  11   0   -2.45    4.11 
  11  11   0    2.74    4.16 
 -10  12   0    2.34    3.99 
  10 -12   0   -1.46    3.71 
 -10  12   0   -5.26    4.48 
  10 -12   0   -1.09    4.43 
 -12 -10   0   -6.27    3.51 
 -12 -10   0   -2.23    4.16 
 -12  -9   0   62.03    7.95 
   9 -12   0   60.76    7.81 
  -9  12   0   62.43    8.17 
   9 -12   0   66.38    7.55 
  -9  12   0   70.35    7.35 
 -12  -9   0   68.13    7.54 
 -12  -9   0   61.19    7.45 
   8 -12   0   -0.55    3.22 
 -12  -8   0   -1.25    3.76 
  -8  12   0   -0.06    3.46 
  -8  12   0    1.75    3.32 
 -12  -8   0   -0.83    3.18 
 -12  -8   0   -3.82    3.10 
 -12  -8   0    3.70    3.64 
 -12  -7   0   28.40    4.69 
 -12  -7   0   28.36    4.26 
  -7  12   0   26.09    4.86 
   7 -12   0   28.51    4.78 
   7 -12   0   32.15    5.26 
  -7  12   0   24.90    4.28 
 -12  -6   0    7.46    2.91 
 -12  -6   0   13.67    3.67 
   6 -12   0    9.37    2.90 
   6 -12   0   10.18    3.68 
 -12  -6   0    8.90    3.61 
  -6  12   0    5.46    3.12 
  -6  12   0    8.92    3.26 
 -12  -5   0   41.10    5.65 
 -12  -5   0   36.43    4.92 
  -5  12   0   40.02    5.94 
   5 -12   0   36.64    4.47 
  -5  12   0   39.56    5.84 
  12   5   0   39.15    5.82 
   5 -12   0   37.81    5.90 
 -12  -5   0   32.37    4.38 
 -12  -5   0   35.27    5.56 
 -12  -4   0   34.55    5.06 
  -4  12   0   36.80    5.77 
 -12  -4   0   29.95    4.37 
 -12  -4   0   35.19    4.06 
   4 -12   0   32.63    4.89 
  -4  12   0   30.22    3.39 
  -4  12   0   32.51    5.39 
 -12  -4   0   34.94    5.25 
  12   4   0   29.97    4.86 
 -12  -3   0   23.13    3.93 
 -12  -3   0   22.85    3.64 
  -3  12   0   19.90    3.86 
  -3  12   0   24.08    4.30 
  12   3   0   23.60    4.29 
 -12  -3   0   25.28    3.36 
   3 -12   0   22.01    4.12 
 -12  -3   0   27.62    3.98 
   2 -12   0   59.24    6.77 
  12   2   0   67.23    6.72 
  -2  12   0   55.52    6.51 
 -12  -2   0   54.10    6.15 
 -12  -2   0   55.28    5.46 
  -2  12   0   58.71    6.34 
   1 -12   0    1.17    2.85 
 -12  -1   0   -0.02    2.50 
  12   1   0    1.65    2.67 
  -1  12   0   -0.22    2.57 
 -12  -1   0    0.28    1.70 
  -1  12   0    0.40    2.64 
 -12  -1   0    0.25    1.98 
   0  12   0   75.13    7.21 
  12   0   0   70.61    5.60 
 -12   0   0   77.90    6.97 
 -12   0   0   78.59    6.21 
 -12   0   0   83.91    5.75 
   0  12   0   74.73    6.87 
  12   0   0   74.38    7.47 
   0 -12   0   78.95    7.59 
 -12   1   0   -0.08    2.45 
  -1 -12   0    1.60    2.84 
 -12   1   0    0.39    1.62 
  12  -1   0    2.59    1.53 
 -12   1   0   -1.64    1.87 
   1  12   0   -0.39    2.91 
   1  12   0    1.53    2.83 
  12  -1   0    0.69    2.60 
 -12   2   0   53.51    5.87 
  12  -2   0   63.67    5.37 
   2  12   0   52.35    6.13 
 -12   2   0   59.38    5.37 
  12  -2   0   62.94    4.94 
  12  -2   0   60.87    6.84 
  -2 -12   0   68.21    7.09 
   2  12   0   49.66    6.35 
  12  -3   0   20.92    4.22 
  12  -3   0   22.20    3.00 
 -12   3   0   25.18    3.93 
 -12   3   0   28.03    4.47 
 -12   3   0   25.13    3.75 
   3  12   0   20.53    4.20 
  -3 -12   0   21.41    4.19 
  12  -3   0   26.68    3.68 
   3  12   0   25.33    4.46 
  12  -4   0   28.18    4.04 
 -12   4   0   39.25    5.81 
   4  12   0   35.95    5.20 
 -12   4   0   37.61    4.60 
   4  12   0   36.22    5.94 
 -12   4   0   31.34    4.52 
  -4 -12   0   40.90    6.13 
  12  -4   0   30.98    5.03 
   5  12   0   40.20    6.23 
  -5 -12   0   43.79    6.48 
  12  -5   0   41.24    4.63 
  12  -5   0   39.67    6.33 
 -12   5   0   45.53    6.37 
 -12   5   0   46.11    5.07 
 -12   5   0   40.95    5.13 
   6  12   0   14.20    4.24 
  -6 -12   0    8.21    4.03 
   6  12   0    9.04    3.40 
  12  -6   0   10.86    2.58 
 -12   6   0    7.42    2.71 
 -12   6   0    7.67    3.83 
  12  -7   0   27.93    4.62 
   7  12   0   29.05    5.17 
 -12   7   0   36.64    6.09 
   7  12   0   21.68    5.16 
  12  -7   0   26.49    5.09 
 -12   7   0   32.80    4.83 
  12  -8   0    4.88    2.66 
 -12   8   0    7.08    3.88 
   8  12   0   -1.06    3.78 
  12  -8   0    5.75    4.15 
 -12   8   0    0.39    3.00 
  -8 -12   0    0.94    3.98 
   9  12   0   66.82    8.49 
  12  -9   0   56.46    6.58 
 -12   9   0   55.78    7.65 
 -12   9   0   45.40    6.53 
  -9 -12   0   78.49    8.61 
 -10 -12   0    0.47    4.25 
  12 -10   0    5.50    3.59 
 -12  10   0   -6.05    4.52 
  10  12   0    4.65    4.17 
  12 -10   0    4.30    4.58 
 -12  10   0   -4.05    3.50 
 -10 -12   0   -2.09    5.07 
   9 -13   0   -2.86    4.04 
 -13  -9   0   -1.09    4.08 
 -13  -9   0    6.77    4.03 
 -13  -9   0    4.04    4.43 
  -9  13   0   -1.26    4.47 
  -9  13   0   -1.91    4.59 
   9 -13   0   -2.68    3.94 
 -13  -9   0    3.36    4.20 
 -13  -8   0   51.87    7.57 
 -13  -8   0   30.70    5.69 
   8 -13   0   34.94    5.77 
  -8  13   0   39.68    6.42 
  -8  13   0   45.86    6.98 
   8 -13   0   32.37    5.12 
 -13  -8   0   34.34    5.73 
 -13  -8   0   46.81    6.63 
  -7  13   0   -0.56    3.68 
 -13  -7   0    6.80    3.69 
  -7  13   0   -1.93    4.09 
   7 -13   0   -3.29    3.03 
 -13  -7   0   -0.17    3.39 
 -13  -7   0   -2.69    3.92 
   7 -13   0    1.46    3.66 
  -6  13   0   45.93    6.91 
 -13  -6   0   35.25    5.12 
 -13  -6   0   37.70    6.06 
   6 -13   0   39.75    5.89 
  -6  13   0   39.42    5.51 
 -13  -6   0   33.50    5.25 
 -13  -5   0   60.75    6.34 
  -5  13   0   56.97    6.87 
   5 -13   0   64.48    7.37 
 -13  -5   0   53.13    6.46 
  -5  13   0   51.04    7.63 
 -13  -5   0   48.28    7.51 
  13   5   0   49.00    6.92 
 -13  -4   0   30.27    4.17 
  13   4   0   36.88    6.12 
 -13  -4   0   37.23    5.38 
  -4  13   0   37.81    2.89 
   4 -13   0   26.63    4.89 
  -4  13   0   39.92    6.54 
 -13  -4   0   31.10    4.77 
  -4  13   0   32.79    5.22 
 -13  -3   0   31.81    4.88 
  13   3   0   28.05    5.03 
  -3  13   0   38.60    6.35 
 -13  -3   0   35.10    4.97 
 -13  -3   0   44.68    5.77 
  -3  13   0   28.88    5.82 
  13   2   0   25.68    5.03 
 -13  -2   0   22.41    4.17 
 -13  -2   0   22.90    3.43 
  -2  13   0   22.55    4.09 
 -13  -2   0   21.18    3.65 
  -2  13   0   25.39    5.34 
   1 -13   0   78.52    9.06 
  -1  13   0   67.89    7.38 
 -13  -1   0   75.08    7.26 
  -1  13   0   72.39    7.73 
 -13  -1   0   73.58    6.53 
  13   1   0   85.36    8.20 
   0 -13   0   -1.90    3.76 
 -13   0   0   -1.26    2.57 
 -13   0   0   -1.93    2.27 
  13   0   0    0.87    1.84 
  13   0   0   -2.10    3.12 
   0  13   0   -3.51    2.94 
   0  13   0   -1.95    2.82 
   1  13   0   71.05    7.46 
 -13   1   0   76.39    7.37 
   1  13   0   68.13    7.45 
 -13   1   0   63.92    6.28 
  13  -1   0   77.35    5.77 
  -1 -13   0   73.81   11.29 
  13  -1   0   68.90   10.82 
 -13   2   0   21.03    4.23 
 -13   2   0   27.79    4.48 
  13  -2   0   19.08    2.89 
   2  13   0   30.05    7.90 
  13  -2   0   14.79    7.18 
   2  13   0   20.67    4.44 
  13  -3   0   39.01    6.02 
 -13   3   0   39.50    4.96 
  -3 -13   0   32.45    6.53 
   3  13   0   42.47    6.77 
   3  13   0   35.99    5.65 
  13  -3   0   34.69    4.32 
 -13   4   0   38.99    6.45 
  13  -4   0   28.46    5.25 
  13  -4   0   42.27    4.72 
   4  13   0   42.61    6.53 
 -13   4   0   37.96    5.10 
  -4 -13   0   45.17    7.05 
 -13   5   0   61.78    6.15 
   5  13   0   58.87    7.27 
 -13   5   0   55.77    7.43 
  13  -5   0   53.32    7.77 
   5  13   0   52.38    7.56 
  13  -5   0   45.09    5.37 
  -5 -13   0   57.13    7.66 
  -6 -13   0   45.24    7.38 
  13  -6   0   34.14    5.84 
 -13   6   0   36.58    5.81 
   6  13   0   29.21    5.70 
  13  -6   0   45.73    5.21 
   6  13   0   40.05    6.88 
 -13   6   0   32.56    5.46 
   7  13   0    2.50    4.18 
  13  -7   0    5.29    4.62 
  13  -7   0    2.55    2.81 
  -7 -13   0    3.06    4.23 
   7  13   0    4.03    3.92 
 -13   7   0    0.74    4.24 
 -13   7   0    0.40    2.90 
 -13   8   0   41.94    6.25 
  13  -8   0   48.46    6.04 
 -13   8   0   44.77    6.72 
  13  -8   0   36.46    6.45 
   8  13   0   40.90    6.48 
  -8 -13   0   36.80    6.11 
  13  -9   0    7.46    3.51 
 -13   9   0   -2.25    3.45 
 -13   9   0    1.13    4.51 
  13  -9   0    0.52    4.85 
   9  13   0    9.84    4.94 
  -9 -13   0    4.55    4.86 
  -7  14   0   35.53    6.35 
 -14  -7   0   25.62    5.23 
 -14  -7   0   28.72    5.45 
 -14  -7   0   24.50    4.84 
   7 -14   0   24.72    5.62 
  -7  14   0   48.62    7.79 
   6 -14   0    9.01    4.26 
  -6  14   0    3.45    4.40 
  -6  14   0    3.26    4.52 
 -14  -6   0    8.13    3.91 
 -14  -6   0    8.55    4.38 
 -14  -6   0    4.86    3.61 
 -14  -5   0   17.69    4.41 
  -5  14   0   24.04    5.22 
   5 -14   0   22.88    5.00 
 -14  -5   0   19.88    4.11 
  -5  14   0   26.08    5.81 
  14   5   0   14.60    4.60 
 -14  -4   0   55.21    6.11 
   4 -14   0   49.29    7.61 
  14   4   0   44.77    7.39 
  -4  14   0   44.51    7.36 
 -14  -4   0   50.43    7.07 
  -4  14   0   47.64    7.64 
 -14  -4   0   47.59    6.53 
  14   3   0    9.97    4.43 
  -3  14   0    9.98    4.31 
 -14  -3   0   20.15    4.10 
 -14  -3   0   14.09    4.27 
 -14  -3   0   15.91    3.33 
  -3  14   0   18.77    4.87 
   3 -14   0   13.97    4.21 
 -14  -2   0   64.91    6.19 
   2 -14   0   67.43    8.33 
  -2  14   0   54.15    7.58 
 -14  -2   0   72.69    7.48 
  14   2   0   75.83    8.72 
  -2  14   0   57.39    7.83 
 -14  -2   0   67.83    6.70 
  14   1   0    4.65    3.99 
 -14  -1   0    2.31    3.06 
 -14  -1   0    1.88    2.94 
   1 -14   0   -5.21    3.19 
  -1  14   0    3.94    3.39 
  -1  14   0    6.19    3.78 
  14   0   0   62.32    8.06 
 -14   0   0   54.76    6.22 
   0  14   0   49.39    6.74 
   0 -14   0   52.98    7.87 
 -14   0   0   57.18    6.78 
   0  14   0   58.76    7.38 
  -1 -14   0   -2.87    3.59 
 -14   1   0    3.56    2.86 
   1  14   0    2.38    3.74 
   1  14   0    3.97    3.96 
  14  -1   0    3.28    4.14 
 -14   1   0   -0.85    3.09 
  -2 -14   0   59.66    8.66 
 -14   2   0   78.91    8.05 
   2  14   0   64.38    8.37 
  14  -2   0   70.80    5.96 
   2  14   0   83.18    8.85 
  14  -2   0   67.85    8.73 
 -14   2   0   73.14    6.82 
  -3 -14   0   14.48    5.24 
  14  -3   0   16.93    5.00 
  14  -3   0   14.40    3.00 
   3  14   0   28.57    5.47 
   3  14   0   11.82    5.03 
 -14   3   0   19.81    4.33 
 -14   3   0   21.10    3.87 
 -14   4   0   53.43    6.37 
  14  -4   0   52.52    5.25 
  -4 -14   0   49.19    7.21 
   4  14   0   42.20    6.41 
 -14   4   0   39.90    6.20 
   4  14   0   61.77    7.65 
  14  -4   0   50.95    7.98 
  14  -5   0   16.61    3.36 
 -14   5   0   19.00    3.99 
   5  14   0   21.47    5.48 
  14  -5   0   22.20    5.69 
  -5 -14   0   22.37    5.15 
 -14   5   0   19.99    5.07 
   5  14   0   20.26    5.10 
  14  -6   0    8.79    5.26 
  14  -6   0    3.92    2.93 
 -14   6   0    6.45    3.45 
   6  14   0    9.15    4.21 
 -14   6   0    2.36    4.04 
  -6 -14   0    5.90    4.91 
   6  14   0   10.68    4.90 
 -14   7   0   24.14    4.54 
   7  14   0   36.05    6.74 
  14  -7   0   28.11    4.78 
   7  14   0   27.23    5.64 
  14  -7   0   26.07    6.37 
 -14   7   0   29.97    5.92 
  -7 -14   0   36.38    6.68 
 -15  -5   0   22.25    5.14 
  -5  15   0   19.59    5.95 
  -5  15   0   29.08    6.03 
   5 -15   0   24.49    5.51 
 -15  -5   0   21.56    5.69 
 -15  -4   0    4.54    3.85 
 -15  -4   0    2.04    4.45 
  -4  15   0   -6.53    4.19 
   4 -15   0    0.35    4.66 
  15   4   0   -5.24    4.38 
  -4  15   0    1.92    4.76 
  -3  15   0   16.84    5.09 
 -15  -3   0   14.08    4.67 
 -15  -3   0   12.73    4.12 
   3 -15   0    8.31    4.52 
  -3  15   0   16.87    5.33 
  15   3   0   12.34    5.03 
 -15  -2   0    1.76    3.97 
  -2  15   0    2.91    4.15 
   2 -15   0   -1.92    4.10 
  -2  15   0    8.53    4.81 
 -15  -2   0   -1.38    3.13 
  15   2   0   -3.12    4.48 
  15   1   0   51.55    8.95 
 -15  -1   0   64.95    8.09 
  -1  15   0   60.12    9.01 
  -1  15   0   76.63    8.97 
   1 -15   0   57.25    8.89 
 -15  -1   0   54.75    7.09 
  15   0   0    0.51    4.69 
   0  15   0    3.65    4.10 
   0 -15   0   -3.63    4.05 
 -15   0   0   -1.97    3.20 
 -15   0   0    1.54    3.95 
   0  15   0    1.01    4.52 
  15  -1   0   61.51    9.46 
   1  15   0   70.70    8.91 
   1  15   0   70.92    8.81 
  -1 -15   0   71.19    9.12 
 -15   1   0   67.74    7.31 
 -15   1   0   60.02    8.14 
  15  -2   0    4.47    4.62 
   2  15   0   -0.91    4.50 
 -15   2   0   -4.69    3.88 
 -15   2   0   -1.14    3.38 
   2  15   0   -0.32    4.39 
  -2 -15   0   -4.80    4.29 
  -3 -15   0   15.00    5.75 
   3  15   0   17.22    5.11 
 -15   3   0   19.51    4.86 
 -15   3   0   12.09    3.82 
   3  15   0   14.43    5.17 
  15  -3   0   13.21    5.69 
   4  15   0    7.18    5.22 
  15  -4   0    5.30    5.28 
  -4 -15   0    2.91    4.75 
 -15   4   0    9.36    3.79 
 -15   4   0    4.29    4.20 
   4  15   0    3.10    4.91 
 -15   5   0   23.50    4.70 
  -5 -15   0   28.11    6.06 
 -15   5   0   33.87    6.07 
   5  15   0   18.77    6.04 
   5  15   0   19.24    5.46 
  15  -5   0   28.20    6.57 
   1   1  -1    2.31    0.32 
   1   1  -1    2.54    0.39 
   1  -1  -1    2.18    0.32 
   1  -1  -1    2.56    0.33 
  -1   1  -1    2.77    0.37 
   1   1  -1    2.67    0.30 
   1   1  -1    1.99    0.37 
   1  -1  -1    2.48    0.37 
   1  -1  -1    2.56    0.33 
  -1   1  -1    2.66    0.34 
  -1   1  -1    2.23    0.35 
  -1  -1   1    2.92    0.40 
  -1   1   1    2.26    0.36 
   1  -1   1    2.71    0.35 
   1   1   1    3.42    0.37 
  -1   1   1    1.96    0.34 
   1  -1   1    2.14    0.34 
   1  -1   1    2.39    0.38 
  -1  -1   1    2.28    0.31 
   1   1   1    2.35    0.37 
  -1   1   1    2.18    0.35 
   1   1   1    2.81    0.39 
   1  -1   1    1.91    0.26 
  -1  -1   1    3.20    0.38 
   2   1  -1  196.63   10.38 
   1  -2  -1  184.24   10.31 
  -2  -1  -1  189.51   10.37 
   1  -2  -1  192.02   10.39 
   2   1  -1  185.14   10.41 
   1  -2  -1  191.32   10.35 
  -2  -1  -1  182.10   10.36 
   1  -2  -1  178.94   10.38 
  -1   2  -1  178.63   10.27 
  -1   2  -1  190.31   10.43 
  -2  -1  -1  177.37   10.32 
  -1   2  -1  171.58   10.37 
  -1   2  -1  194.35   10.31 
  -2  -1  -1  195.73   10.37 
  -2  -1   1  180.51   10.25 
  -1   2   1  172.97   10.33 
  -2  -1   1  181.85   10.35 
   2   1   1  174.53   10.35 
   1  -2   1  172.18   10.36 
   1  -2   1  170.11   10.39 
   1  -2   1  179.08   10.28 
   2   1   1  160.84   10.31 
  -2  -1   1  173.73   10.40 
   1  -2   1  176.93   10.26 
   2   1   1  175.74   10.34 
  -2  -1   1  177.71   10.38 
   2   1   1  181.31   10.35 
  -1   2   1  174.32   10.37 
  -1   2   1  173.52   10.36 
  -2  -1   1  170.55   10.26 
  -1   2   1  198.66   10.32 
   0   2  -1  140.76    7.90 
  -2   0  -1  146.97    7.93 
   0  -2  -1  136.34    7.86 
   0  -2  -1  133.11    7.91 
   2   0  -1  136.07    7.82 
  -2   0  -1  136.56    7.75 
   0   2  -1  137.45    7.87 
   2   0  -1  132.05    7.68 
   2   0  -1  129.90    7.89 
  -2   0  -1  131.95    7.84 
   2   0  -1  123.05    7.88 
   0   2  -1  136.00    7.91 
   0  -2  -1  138.90    7.71 
  -2   0  -1  134.04    7.79 
   0  -2  -1  138.64    7.85 
   0  -2   1  131.20    7.85 
   0   2   1  134.37    7.85 
   2   0   1  126.97    7.89 
  -2   0   1  132.54    7.82 
   2   0   1  136.07    7.79 
   0  -2   1  142.12    7.89 
   2   0   1  140.41    7.76 
  -2   0   1  127.96    7.88 
  -2   0   1  138.85    7.90 
  -2   0   1  139.12    7.68 
   0  -2   1  142.84    7.93 
   0   2   1  140.44    7.72 
   2   0   1  141.23    7.86 
   0   2   1  138.81    7.92 
   0   2   1  140.66    7.89 
   2  -1  -1  166.02   10.30 
   2  -1  -1  166.32   10.25 
   1   2  -1  190.78   10.47 
  -2   1  -1  178.47   10.35 
  -1  -2  -1  170.62   10.40 
   1   2  -1  173.22   10.41 
  -1  -2  -1  182.91   10.39 
   1   2  -1  173.28   10.43 
  -2   1  -1  187.68   10.44 
  -2   1  -1  181.05   10.39 
   1   2  -1  186.77   10.19 
  -1  -2  -1  174.31   10.44 
  -2   1  -1  163.82   10.22 
   2  -1  -1  181.83   10.45 
  -1  -2  -1  175.74   10.25 
   2  -1  -1  178.88   10.42 
  -2   1   1  186.62   10.33 
   1   2   1  187.16   10.46 
   2  -1   1  159.59   10.40 
  -1  -2   1  202.96   10.20 
   1   2   1  184.56   10.44 
  -2   1   1  180.96   10.42 
  -2   1   1  179.01   10.27 
  -1  -2   1  189.38   10.45 
   2  -1   1  189.36   10.41 
   1   2   1  188.64   10.41 
   2  -1   1  186.59   10.35 
  -2   1   1  191.06   10.46 
  -1  -2   1  187.22   10.43 
   2  -1   1  184.46   10.24 
  -1  -2   1  187.90   10.45 
  -2  -2  -1   15.66    1.31 
  -2  -2  -1   16.79    1.19 
  -2  -2  -1   15.50    1.28 
   2  -2  -1   16.46    1.32 
   2  -2  -1   14.51    1.20 
  -2   2  -1   14.28    1.13 
  -2   2  -1   13.78    1.22 
   2   2  -1   14.40    1.33 
  -2   2  -1   13.78    1.30 
   2  -2  -1   15.55    1.27 
   2   2  -1   16.08    1.16 
  -2  -2  -1   14.90    1.32 
   2   2  -1   16.18    1.37 
   2  -2  -1   16.64    1.27 
   2   2  -1   16.26    1.26 
  -2  -2  -1   15.76    1.28 
  -2   2  -1   16.30    1.31 
  -2   2   1   13.91    1.20 
  -2   2   1   13.26    1.24 
   2  -2   1   17.28    1.30 
  -2   2   1   16.14    1.28 
   2   2   1   13.25    1.17 
  -2   2   1   15.55    1.23 
  -2  -2   1   15.95    1.36 
   2   2   1   15.24    1.31 
   2   2   1   14.87    1.28 
   2  -2   1   16.07    1.14 
   2  -2   1   15.76    1.26 
  -2  -2   1   14.76    1.38 
   2  -2   1   14.43    1.26 
  -2  -2   1   15.16    1.23 
  -2  -2   1   14.99    1.14 
  -2   3  -1   44.59    3.12 
   3   2  -1   41.67    3.26 
  -3  -2  -1   46.56    3.17 
  -3  -2  -1   45.15    3.20 
  -3  -2  -1   44.34    3.22 
  -2   3  -1   46.37    3.12 
  -2   3  -1   43.50    3.22 
   2  -3  -1   41.72    3.12 
   2  -3  -1   45.11    3.16 
  -2   3  -1   45.07    3.26 
  -3  -2  -1   46.48    3.16 
   2  -3  -1   43.93    3.23 
   2  -3   1   56.92    3.22 
   2  -3   1   53.95    3.14 
   3   2   1   56.86    3.27 
  -2   3   1   53.29    3.29 
  -3  -2   1   53.38    3.34 
  -3  -2   1   55.06    3.22 
   3   2   1   51.32    3.28 
   2  -3   1   50.04    3.48 
  -2   3   1   54.19    3.31 
  -2   3   1   57.35    3.24 
  -3  -2   1   53.77    3.20 
  -2   3   1   54.82    3.22 
  -3  -2   1   53.96    3.17 
  -3  -2   1   48.57    3.51 
   1  -3  -1  175.40   10.05 
  -3  -1  -1  186.09   10.25 
   1  -3  -1  176.60   10.21 
  -1   3  -1  160.53   10.12 
  -3  -1  -1  181.03   10.20 
  -3  -1  -1  180.61   10.16 
  -3  -1  -1  180.38   10.16 
  -3  -1  -1  194.95   10.14 
   3   1  -1  167.76   10.22 
   1  -3  -1  166.93   10.24 
   1  -3  -1  179.84   10.18 
  -1   3  -1  169.48   10.23 
  -1   3  -1  176.25   10.01 
  -1   3  -1  164.13   10.24 
   1  -3   1  172.12   10.27 
   3   1   1  182.75   10.26 
  -3  -1   1  179.46   10.25 
   1  -3   1  176.52   10.14 
  -1   3   1  156.75   10.15 
   1  -3   1  180.48   10.01 
   3   1   1  171.37   10.11 
  -1   3   1  178.12   10.23 
  -1   3   1  174.35   10.05 
  -3  -1   1  175.89   10.02 
   1  -3   1  179.47   10.23 
  -3  -1   1  171.95   10.18 
  -1   3   1  171.99   10.24 
  -3  -1   1  184.18   10.24 
   3   0  -1   71.90    4.82 
   3   0  -1   76.10    4.54 
  -3   0  -1   79.77    4.78 
  -3   0  -1   82.40    4.66 
   0   3  -1   71.72    4.80 
   0  -3  -1   81.77    4.78 
  -3   0  -1   76.74    4.63 
   0  -3  -1   77.62    4.77 
  -3   0  -1   76.25    4.83 
   0  -3  -1   79.74    4.52 
   0   3  -1   82.82    4.43 
   3   0  -1   81.17    4.72 
   0   3  -1   79.32    4.80 
   0  -3  -1   80.14    4.87 
   3   0  -1   76.32    4.82 
   3   0   1   78.11    4.64 
  -3   0   1   81.25    4.55 
   0   3   1   77.95    4.86 
  -3   0   1   80.27    4.71 
  -3   0   1   78.22    4.83 
   0  -3   1   84.08    4.80 
   3   0   1   82.58    4.81 
   3   0   1   64.84    4.78 
   3   0   1   89.46    4.70 
  -3   0   1   75.93    4.82 
   0  -3   1   73.44    4.83 
   0   3   1   75.32    4.80 
   0   3   1   75.46    4.78 
   0   3   1   78.17    4.54 
   0  -3   1   77.00    4.80 
   1   3  -1  179.21   10.22 
  -1  -3  -1  171.40   10.22 
  -3   1  -1  182.45   10.05 
   3  -1  -1  173.67   10.03 
   3  -1  -1  179.11    9.94 
   1   3  -1  180.30   10.22 
   3  -1  -1  157.93   10.18 
  -3   1  -1  176.37   10.14 
   3  -1  -1  178.01   10.18 
  -1  -3  -1  175.12   10.13 
  -1  -3  -1  183.18   10.20 
  -3   1  -1  170.94    9.94 
  -1  -3  -1  172.31    9.87 
   1   3  -1  174.56   10.20 
  -3   1  -1  166.61   10.18 
   3  -1   1  170.15    9.93 
   3  -1   1  172.43   10.02 
   1   3   1  165.52   10.14 
   1   3   1  173.42   10.22 
   3  -1   1  181.97   10.16 
  -3   1   1  178.71   10.04 
  -1  -3   1  171.99   10.19 
   1   3   1  177.46    9.87 
   3  -1   1  170.49   10.21 
  -1  -3   1  176.73    9.76 
   1   3   1  171.33   10.19 
  -1  -3   1  177.92   10.20 
  -3   1   1  162.10   10.15 
  -1  -3   1  191.07   10.24 
  -3   1   1  184.20    9.96 
  -3   1   1  154.75   10.15 
  -2  -3  -1   55.64    3.42 
   3  -2  -1   54.80    3.22 
  -3   2  -1   53.47    3.36 
  -3   2  -1   58.06    3.39 
  -2  -3  -1   56.52    3.15 
   3  -2  -1   50.72    3.19 
   2   3  -1   57.59    3.41 
   3  -2  -1   51.71    3.52 
   3  -2  -1   59.70    3.45 
   2   3  -1   52.49    3.42 
   2   3  -1   56.22    3.45 
  -3   2  -1   55.47    3.31 
  -2  -3  -1   53.65    3.34 
   2   3  -1   53.43    3.07 
  -3   2  -1   52.08    3.12 
  -2  -3   1   46.18    3.03 
  -3   2   1   43.85    3.16 
  -3   2   1   41.98    3.15 
  -3   2   1   45.20    3.30 
   2   3   1   44.99    3.33 
  -2  -3   1   43.54    3.26 
   3  -2   1   44.11    3.31 
   3  -2   1   46.71    3.08 
   2   3   1   44.05    3.29 
   3  -2   1   44.28    3.22 
   3   3  -1   20.90    1.57 
  -3  -3  -1   19.89    1.75 
   3   3  -1   20.35    1.79 
  -3  -3  -1   18.97    1.76 
  -3  -3  -1   21.54    1.77 
  -3  -3  -1   22.43    1.58 
  -3   3  -1   16.76    1.77 
   3   3  -1   19.77    1.69 
  -3  -3  -1   21.88    1.75 
  -3   3  -1   20.25    1.72 
   3   3  -1   21.01    1.78 
   3  -3  -1   20.88    1.71 
   3  -3  -1   18.52    1.68 
   3  -3  -1   20.87    1.74 
  -3   3  -1   20.94    1.56 
   3  -3  -1   22.79    1.65 
  -3  -3   1   20.65    1.74 
  -3  -3   1   20.58    1.69 
   3   3   1   21.47    1.60 
  -3  -3   1   18.02    1.79 
   3  -3   1   21.07    1.56 
   3   3   1   19.45    1.79 
  -3   3   1   17.98    1.63 
  -3   3   1   18.31    1.67 
   3   3   1   20.01    1.76 
  -3   3   1   20.82    1.64 
   3  -3   1   19.39    1.71 
   3  -3   1   19.09    1.72 
   3  -3   1   22.84    1.73 
  -3  -3   1   19.48    1.53 
  -4  -3  -1   53.28    4.16 
  -3   4  -1   53.57    4.17 
  -4  -3  -1   57.45    4.20 
  -3   4  -1   51.58    4.56 
   3  -4  -1   56.57    4.18 
  -4  -3  -1   58.52    4.20 
  -3   4  -1   57.50    4.04 
   3  -4  -1   59.73    4.10 
   3  -4  -1   55.24    4.11 
   3  -4  -1   55.86    4.19 
  -4  -3  -1   56.99    4.11 
   4   3  -1   56.58    4.09 
  -4  -3   1   74.03    4.42 
  -3   4   1   75.35    4.23 
   4   3   1   73.35    4.37 
   3  -4   1   73.38    4.23 
   4   3   1   67.04    4.33 
   3  -4   1   72.95    4.34 
  -3   4   1   64.67    4.75 
  -3   4   1   69.43    4.21 
  -3   4   1   72.97    4.32 
   3  -4   1   72.01    4.38 
  -4  -3   1   73.17    4.23 
  -4  -3   1   65.34    4.34 
   4   3   1   74.38    4.25 
  -4  -2  -1  158.71    9.46 
   2  -4  -1  151.92    9.46 
  -4  -2  -1  153.83    9.41 
   4   2  -1  142.26    9.38 
   2  -4  -1  153.99    9.43 
  -2   4  -1  143.88    9.21 
   2  -4  -1  155.71    9.27 
  -2   4  -1  141.80    9.30 
  -4  -2  -1  139.97    9.27 
  -4  -2  -1  146.76    9.38 
   4   2  -1  138.08    9.44 
  -2   4  -1  149.61    9.45 
   2  -4  -1  147.07    9.32 
  -2   4  -1  155.63    9.51 
  -4  -2   1  174.11    9.58 
   4   2   1  166.59    9.49 
   2  -4   1  166.70    9.28 
  -2   4   1  163.06    9.51 
   4   2   1  155.46    9.43 
  -4  -2   1  166.47    9.32 
  -4  -2   1  175.77    9.54 
  -2   4   1  171.15    9.44 
   4   2   1  158.85    9.36 
  -2   4   1  174.90    9.34 
  -4  -2   1  147.85    9.59 
   2  -4   1  172.16    9.51 
  -4  -2   1  171.08    9.27 
   2  -4   1  169.81    9.56 
  -4  -2   1  174.81    9.50 
  -2   4   1  176.24    9.55 
   4   1  -1  173.73   10.30 
  -1   4  -1  192.40   10.42 
  -4  -1  -1  182.06   10.15 
  -4  -1  -1  181.03   10.28 
  -1   4  -1  166.80    9.92 
  -1   4  -1  159.39   10.17 
  -4  -1  -1  177.24   10.27 
   1  -4  -1  183.35    9.99 
  -1   4  -1  183.16   10.32 
  -4  -1  -1  203.64   10.37 
   1  -4  -1  190.12   10.28 
  -4  -1  -1  201.30   10.13 
   1  -4  -1  181.22   10.22 
   1  -4  -1  184.46   10.37 
  -4  -1  -1  178.63   10.17 
  -4  -1   1  174.61   10.28 
   4   1   1  185.04   10.36 
   1  -4   1  156.17    9.91 
  -4  -1   1  161.82   10.28 
   4   1   1  149.93   10.04 
  -1   4   1  167.55   10.25 
  -1   4   1  166.44   10.21 
  -4  -1   1  156.87   10.14 
  -4  -1   1  169.22   10.27 
  -1   4   1  165.76   10.29 
  -1   4   1  162.31    9.96 
  -4  -1   1  166.03    9.97 
   1  -4   1  169.50   10.24 
   1  -4   1  155.40   10.27 
   0  -4  -1  281.21   16.48 
   0  -4  -1  285.82   16.51 
   4   0  -1  316.23   16.24 
   0   4  -1  289.60   16.54 
   4   0  -1  297.09   16.61 
  -4   0  -1  278.50   16.31 
   4   0  -1  285.53   16.41 
   4   0  -1  292.16   16.63 
   0   4  -1  284.21   16.03 
   0  -4  -1  289.16   16.62 
   0  -4  -1  292.74   16.14 
   0   4  -1  253.46   16.49 
  -4   0  -1  287.60   16.31 
  -4   0  -1  283.59   16.51 
   0   4  -1  287.17   16.61 
  -4   0  -1  298.04   16.62 
   0   4   1  285.51   16.55 
   0  -4   1  274.46   16.59 
  -4   0   1  277.29   16.38 
   4   0   1  281.87   16.55 
   4   0   1  293.21   16.34 
   4   0   1  295.08   16.33 
   0   4   1  270.51   16.49 
   0   4   1  290.22   16.62 
   0  -4   1  290.57   16.54 
   0   4   1  283.89   16.15 
  -4   0   1  283.14   16.58 
   0  -4   1  314.12   16.56 
  -4   0   1  273.95   16.54 
  -4   0   1  283.17   16.20 
   4   0   1  287.64   16.62 
  -1  -4  -1  184.29   10.51 
  -4   1  -1  169.50   10.20 
  -1  -4  -1  166.26   10.52 
   4  -1  -1  163.55   10.14 
  -1  -4  -1  171.52   10.41 
  -4   1  -1  180.20   10.54 
  -1  -4  -1  169.01   10.04 
   1   4  -1  170.12   10.49 
  -4   1  -1  174.44   10.27 
   4  -1  -1  170.70   10.46 
   1   4  -1  153.55   10.45 
   1   4  -1  178.33   10.55 
  -4   1  -1  160.02   10.39 
   4  -1  -1  168.16   10.28 
   4  -1  -1  158.34   10.49 
   1   4   1  181.44   10.54 
   4  -1   1  183.31   10.57 
   4  -1   1  185.36   10.23 
  -4   1   1  189.76   10.57 
   4  -1   1  178.99   10.45 
   1   4   1  186.63   10.05 
  -4   1   1  204.97   10.23 
  -1  -4   1  182.97   10.56 
   1   4   1  182.16   10.56 
   4  -1   1  187.93   10.29 
  -1  -4   1  189.23   10.53 
  -1  -4   1  201.51   10.56 
   1   4   1  167.61   10.44 
  -4   1   1  183.51   10.32 
  -4   1   1  179.07   10.51 
  -2  -4  -1  170.49    9.80 
   2   4  -1  180.26    9.79 
  -4   2  -1  171.87    9.42 
   4  -2  -1  172.18    9.47 
  -4   2  -1  174.21    9.72 
   4  -2  -1  174.54    9.74 
  -4   2  -1  168.45    9.56 
  -2  -4  -1  178.71    9.33 
   4  -2  -1  174.22    9.51 
   4  -2  -1  174.62    9.82 
   2   4  -1  163.56    9.78 
   2   4  -1  168.95    9.79 
  -2  -4  -1  172.22    9.70 
  -4   2  -1  182.40    9.80 
  -2  -4  -1  177.82    9.77 
  -2  -4  -1  172.21    9.35 
  -2  -4   1  151.55    9.69 
  -2  -4   1  139.19    9.62 
   2   4   1  149.94    9.70 
   2   4   1  138.32    9.65 
  -2  -4   1  156.54    9.23 
   2   4   1  147.64    9.66 
  -2  -4   1  153.86    9.69 
  -4   2   1  148.59    9.46 
  -4   2   1  149.83    9.65 
   4  -2   1  147.39    9.36 
  -4   2   1  170.93    9.49 
   4  -2   1  153.51    9.51 
   4  -2   1  140.13    9.66 
   4  -2   1  156.13    9.65 
  -4   2   1  157.23    9.70 
  -3  -4  -1   73.26    4.10 
  -4   3  -1   70.76    4.08 
   3   4  -1   77.00    4.42 
  -3  -4  -1   71.83    4.04 
   3   4  -1   68.62    4.88 
  -3  -4  -1   73.06    4.36 
  -3  -4  -1   72.12    4.42 
   4  -3  -1   73.33    4.43 
  -4   3  -1   70.14    4.28 
   3   4  -1   73.41    4.01 
   4  -3  -1   72.54    4.22 
  -3  -4  -1   74.24    4.44 
   3   4  -1   59.53    4.66 
   4  -3  -1   72.27    4.17 
   3   4   1   52.92    4.24 
   4  -3   1   52.93    4.22 
   4  -3   1   61.90    4.29 
  -3  -4   1   56.32    3.91 
   4  -3   1   54.49    3.97 
   4  -3   1   56.19    4.16 
  -4   3   1   58.46    4.26 
  -3  -4   1   55.01    4.27 
  -3  -4   1   54.47    4.21 
  -4   3   1   56.83    4.07 
  -3  -4   1   56.38    4.28 
  -4   4  -1  187.16   11.12 
   4   4  -1  184.77   10.91 
  -4  -4  -1  179.18   11.17 
  -4  -4  -1  192.08   11.23 
   4   4  -1  189.94   11.35 
   4  -4  -1  195.75   11.22 
  -4   4  -1  189.85   10.90 
  -4  -4  -1  162.36   11.05 
   4  -4  -1  170.70   11.02 
   4   4  -1  180.55   11.30 
   4  -4  -1  186.68   10.96 
   4  -4  -1  194.89   11.19 
  -4  -4  -1  200.44   11.16 
  -4   4  -1  196.18   11.30 
  -4   4  -1  186.16   11.14 
  -4   4   1  184.17   11.13 
  -4   4   1  179.77   11.22 
  -4   4   1  192.06   11.00 
  -4  -4   1  182.32   11.10 
   4   4   1  167.79   11.23 
  -4  -4   1  194.87   11.28 
   4  -4   1  210.54   10.94 
  -4  -4   1  188.20   10.89 
   4  -4   1  187.13   11.18 
  -4  -4   1  200.05   11.31 
   4  -4   1  179.08   11.10 
   4   4   1  185.07   10.94 
   4   4   1  178.98   11.23 
  -4   4   1  183.12   11.06 
   4  -4   1  174.99   11.09 
   4  -5  -1  222.80   12.86 
  -4   5  -1  203.30   12.88 
  -5  -4  -1  203.31   12.91 
   5   4  -1  207.36   13.21 
  -5  -4  -1  210.59   13.07 
  -4   5  -1  209.83   12.81 
  -5  -4  -1  205.47   12.84 
   4  -5  -1  198.11   13.00 
   4  -5  -1  219.34   13.09 
   5   4  -1  204.53   12.84 
  -4   5  -1  200.63   13.10 
  -5  -4  -1  208.49   13.04 
  -4   5  -1  206.66   13.05 
  -5  -4  -1  196.98   13.03 
   4  -5   1  220.61   13.34 
  -5  -4   1  205.23   13.25 
  -5  -4   1  237.11   13.24 
   4  -5   1  232.63   13.15 
  -5  -4   1  233.07   12.89 
  -4   5   1  209.38   12.93 
  -5  -4   1  242.11   12.97 
  -4   5   1  224.23   12.98 
   4  -5   1  241.93   12.84 
   5   4   1  223.85   12.94 
  -5  -4   1  233.53   13.19 
   5   4   1  224.23   13.18 
  -4   5   1  241.37   13.12 
  -4   5   1  230.02   13.25 
   4  -5   1  233.53   13.19 
   5   4   1  229.13   13.23 
  -5  -3  -1  195.58   10.42 
  -3   5  -1  196.71   10.58 
  -5  -3  -1  200.85   10.26 
  -3   5  -1  191.28   10.47 
  -3   5  -1  178.49   10.18 
   3  -5  -1  201.91   10.27 
  -5  -3  -1  193.81   10.46 
  -5  -3  -1  191.94   10.33 
   5   3  -1  184.73   10.53 
   3  -5  -1  190.85   10.51 
   3  -5  -1  192.49   10.40 
  -5  -3   1  169.53   10.21 
  -5  -3   1  148.89   10.29 
   3  -5   1  154.82   10.07 
  -5  -3   1  160.90   10.06 
  -5  -3   1  154.45   10.33 
   5   3   1  146.58   10.16 
  -3   5   1  154.78   10.39 
   5   3   1  144.02   10.27 
   3  -5   1  146.42   10.33 
  -3   5   1  158.50   10.28 
  -3   5   1  164.04   10.12 
   3  -5   1  152.13   10.04 
  -5  -3   1  159.72   10.32 
  -5  -3   1  144.10   10.07 
  -2   5  -1  162.36    9.76 
   2  -5  -1  161.22    9.39 
  -5  -2  -1  164.99    9.58 
  -2   5  -1  161.24    9.78 
  -5  -2  -1  163.12    9.62 
  -5  -2  -1  158.59    9.64 
  -5  -2  -1  172.02    9.49 
   2  -5  -1  171.26    9.68 
   2  -5  -1  181.51    9.61 
   5   2  -1  171.91    9.73 
   2  -5  -1  147.18   10.10 
  -2   5  -1  156.70    9.55 
  -5  -2  -1  167.29    9.69 
  -2   5  -1  176.24    9.39 
  -5  -2   1  144.46    9.63 
  -5  -2   1  167.03    9.69 
  -5  -2   1  152.18    9.64 
   5   2   1  148.91    9.64 
   5   2   1  139.98    9.43 
   2  -5   1  158.86    9.66 
  -5  -2   1  159.25    9.63 
   2  -5   1  154.78    9.34 
  -2   5   1  148.90    9.71 
  -2   5   1  164.08    9.76 
   2  -5   1  153.13    9.48 
  -2   5   1  162.63    9.39 
  -5  -2   1  158.88    9.37 
   2  -5   1  145.72    9.75 
  -5  -1  -1  224.15   13.40 
   1  -5  -1  244.33   13.42 
  -1   5  -1  220.99   13.49 
  -1   5  -1  213.18   13.46 
  -1   5  -1  224.51   12.98 
   5   1  -1  217.13   13.08 
  -5  -1  -1  218.32   13.43 
   1  -5  -1  240.62   13.44 
  -5  -1  -1  220.28   13.23 
  -5  -1  -1  223.11   13.42 
  -5  -1  -1  256.35   13.22 
  -5  -1  -1  227.39   13.30 
  -1   5  -1  224.13   13.38 
   1  -5  -1  228.50   13.04 
  -5  -1   1  228.92   13.46 
  -1   5   1  208.41   13.59 
   5   1   1  193.56   13.69 
   5   1   1  238.86   13.23 
  -5  -1   1  234.51   13.45 
   1  -5   1  240.01   12.99 
  -1   5   1  224.44   13.50 
  -5  -1   1  249.49   13.11 
   1  -5   1  237.72   13.36 
  -5  -1   1  229.51   13.32 
  -1   5   1  229.12   13.04 
   1  -5   1  235.19   13.43 
   1  -5   1  224.31   13.60 
   5   0  -1  141.52    8.49 
   5   0  -1  150.25    8.96 
  -5   0  -1  141.73    8.62 
  -5   0  -1  149.04    8.62 
   0   5  -1  151.57    9.01 
   0  -5  -1  128.29    9.29 
   0  -5  -1  145.91    8.84 
   0  -5  -1  147.10    8.37 
   0   5  -1  145.72    8.92 
  -5   0  -1  148.02    8.97 
  -5   0  -1  143.98    8.86 
   5   0  -1  152.11    8.75 
   0  -5  -1  157.15    8.89 
  -5   0   1  148.90    8.95 
  -5   0   1  146.93    8.72 
   5   0   1  141.48    8.61 
   0  -5   1  147.83    8.87 
   0   5   1  152.70    8.39 
   5   0   1  157.41    8.95 
   5   0   1  147.51    8.69 
   0  -5   1  153.66    8.89 
  -5   0   1  147.99    8.50 
   0  -5   1  127.79    9.27 
   0   5   1  140.99    8.93 
   0   5   1  146.53    8.99 
   5  -1  -1  235.12   12.92 
   5  -1  -1  240.98   13.12 
  -1  -5  -1  229.67   13.46 
   1   5  -1  190.84   13.53 
   5  -1  -1  240.32   13.36 
  -5   1  -1  197.14   13.48 
   1   5  -1  243.00   13.46 
  -5   1  -1  242.37   13.07 
  -5   1  -1  228.92   12.99 
  -1  -5  -1  234.92   13.27 
   5  -1  -1  219.82   13.45 
   1   5  -1  211.70   13.70 
  -1  -5  -1  221.12   13.28 
  -1  -5  -1  236.44   12.71 
  -5   1  -1  208.96   13.30 
  -1  -5   1  199.47   13.68 
  -1  -5   1  240.34   13.33 
   1   5   1  215.40   13.31 
  -1  -5   1  246.48   13.37 
   5  -1   1  229.53   13.00 
   1   5   1  226.92   13.39 
  -5   1   1  229.73   12.94 
   5  -1   1  224.54   13.02 
  -5   1   1  226.27   13.42 
   5  -1   1  223.00   13.27 
  -5   1   1  240.94   13.41 
   1   5   1  220.66   13.38 
  -5   1   1  223.19   13.07 
   5  -1   1  203.17   13.40 
  -2  -5  -1  166.22    9.83 
   5  -2  -1  161.75    9.88 
  -5   2  -1  138.00    9.78 
  -5   2  -1  150.65    9.50 
  -5   2  -1  152.52    9.83 
  -2  -5  -1  161.67    9.86 
  -2  -5  -1  159.38    9.34 
  -2  -5  -1  153.72    9.97 
   2   5  -1  144.61    9.91 
   2   5  -1  154.64    9.99 
  -2  -5  -1  167.12    9.32 
   5  -2  -1  155.53    9.50 
   5  -2  -1  152.87    9.59 
  -5   2  -1  170.24    9.71 
   5  -2  -1  171.48   10.07 
   2   5  -1  160.29    9.91 
  -2  -5   1  175.31    9.94 
  -5   2   1  155.97    9.60 
  -5   2   1  161.57    9.92 
  -2  -5   1  174.38    9.92 
   2   5   1  176.34   10.04 
  -5   2   1  159.70    9.56 
   5  -2   1  177.16   10.11 
  -5   2   1  169.53    9.97 
  -2  -5   1  154.61    9.94 
   5  -2   1  176.62    9.91 
  -2  -5   1  173.84    9.22 
   2   5   1  175.07   10.06 
  -2  -5   1  168.05    9.23 
   5  -2   1  165.98    9.52 
   5  -2   1  171.31    9.65 
   5  -3  -1  155.77   10.23 
   3   5  -1  153.47   10.49 
  -5   3  -1  165.32   10.19 
   5  -3  -1  153.76   10.22 
   5  -3  -1  151.92   10.57 
  -5   3  -1  149.20   10.50 
  -3  -5  -1  162.22   10.52 
   5  -3  -1  160.01   10.51 
  -5   3  -1  159.60   10.36 
  -5   3  -1  191.50   10.65 
   3   5  -1  153.21   10.62 
  -3  -5  -1  154.76   10.04 
  -3  -5  -1  151.90   10.06 
  -3  -5  -1  152.15   10.43 
  -3  -5  -1  155.36   10.63 
   3   5   1  192.51   10.74 
  -5   3   1  194.12   10.72 
   5  -3   1  187.28   10.42 
  -3  -5   1  195.66   10.72 
   5  -3   1  202.51   10.68 
  -3  -5   1  197.71   10.75 
   5  -3   1  183.05   10.73 
   3   5   1  189.48   10.81 
  -3  -5   1  202.76   10.73 
  -5   3   1  204.45   10.39 
   5  -3   1  193.88   10.42 
  -3  -5   1  203.95   10.08 
  -5   4  -1  218.51   12.90 
  -5   4  -1  237.09   13.20 
   5  -4  -1  232.21   13.39 
   5  -4  -1  230.50   13.30 
  -4  -5  -1  236.11   13.34 
  -5   4  -1  230.07   13.27 
  -4  -5  -1  233.48   13.29 
   5  -4  -1  233.55   13.01 
  -4  -5  -1  231.57   12.89 
  -4  -5  -1  239.29   13.43 
  -5   4  -1  226.36   13.33 
   4   5  -1  231.09   12.87 
   4   5  -1  235.37   13.51 
   4   5  -1  217.86   13.43 
  -4  -5  -1  233.43   12.94 
   5  -4  -1  231.60   13.09 
   5  -4   1  206.85   13.19 
   4   5   1  199.06   13.31 
  -4  -5   1  215.66   12.80 
   5  -4   1  202.43   13.17 
  -4  -5   1  224.11   13.32 
  -4  -5   1  193.54   13.19 
   5  -4   1  206.61   12.85 
  -4  -5   1  217.67   13.30 
  -5   4   1  195.41   13.24 
   5  -4   1  216.47   13.33 
   4   5   1  208.10   13.32 
  -5   4   1  216.54   13.07 
   5  -5  -1  227.39   13.25 
  -5   5  -1  216.49   13.15 
  -5   5  -1  207.65   13.30 
   5  -5  -1  227.28   13.29 
  -5   5  -1  210.01   13.07 
   5   5  -1  227.71   12.90 
  -5  -5  -1  214.77   12.87 
   5   5  -1  213.55   13.39 
   5   5  -1  218.94   13.44 
  -5  -5  -1  203.93   13.22 
  -5  -5  -1  223.22   13.27 
   5  -5  -1  224.41   13.16 
   5  -5  -1  229.70   12.95 
  -5  -5  -1  210.03   13.06 
   5   5   1  226.70   13.39 
   5  -5   1  232.29   12.86 
  -5  -5   1  220.02   12.84 
  -5  -5   1  235.47   13.73 
  -5  -5   1  218.48   13.23 
   5   5   1  220.52   13.40 
  -5   5   1  210.54   13.00 
   5  -5   1  225.16   13.21 
  -5  -5   1  227.46   13.11 
   5  -5   1  195.81   13.14 
  -5   5   1  217.95   13.33 
  -5   5   1  214.05   13.11 
  -5   5   1  220.93   13.08 
  -5  -5   1  207.56   13.71 
   5  -5   1  217.44   13.21 
  -5   6  -1   39.48    4.05 
  -6  -5  -1   43.14    3.90 
  -6  -5  -1   47.90    3.50 
   5  -6  -1   51.32    3.99 
  -6  -5  -1   53.62    3.66 
  -5   6  -1   48.90    3.72 
  -6  -5  -1   44.97    3.83 
   5  -6  -1   47.40    3.48 
  -6  -5  -1   43.55    3.75 
  -5   6  -1   48.65    3.56 
   6   5  -1   50.31    3.76 
   6   5  -1   45.67    4.15 
   5  -6  -1   47.73    3.97 
   5  -6  -1   42.67    3.57 
   5  -6   1   46.74    3.89 
  -5   6   1   47.00    3.59 
   5  -6   1   47.67    3.36 
   6   5   1   45.49    4.01 
  -6  -5   1   40.32    3.33 
  -5   6   1   38.88    3.68 
  -6  -5   1   43.91    3.58 
  -6  -5   1   45.84    3.83 
  -5   6   1   42.82    3.98 
  -6  -5   1   45.40    3.83 
  -5   6   1   41.86    3.61 
   5  -6   1   45.01    3.58 
  -6  -5   1   43.42    3.83 
   6   5   1   43.41    3.70 
   5  -6   1   44.37    3.92 
   6   4  -1   79.31    6.07 
  -6  -4  -1   88.02    5.99 
  -4   6  -1   88.21    6.21 
   4  -6  -1   86.40    6.05 
  -6  -4  -1   88.03    5.93 
  -4   6  -1   88.50    6.01 
  -6  -4  -1   87.11    5.75 
  -4   6  -1   82.38    5.67 
  -6  -4  -1   89.39    5.77 
   4  -6  -1   84.80    5.89 
  -4   6  -1   90.38    5.82 
   6   4  -1   85.42    5.94 
   4  -6  -1   75.97    5.78 
  -6  -4  -1   87.27    5.95 
   4  -6  -1   83.74    5.64 
  -6  -4   1   90.68    5.77 
   4  -6   1   95.35    5.99 
   4  -6   1   92.32    6.19 
  -6  -4   1   88.48    5.87 
   6   4   1   86.62    6.05 
  -4   6   1   94.10    5.79 
  -6  -4   1   86.26    5.67 
  -4   6   1   89.17    6.15 
  -4   6   1   85.82    5.90 
  -6  -4   1   97.88    6.26 
  -4   6   1   91.96    6.00 
   6   4   1   85.59    6.03 
   4  -6   1   86.71    6.17 
   4  -6   1   88.98    5.64 
   3  -6  -1   52.49    4.04 
   3  -6  -1   54.64    4.14 
  -6  -3  -1   58.61    4.15 
  -3   6  -1   55.38    4.01 
  -3   6  -1   55.23    4.36 
  -3   6  -1   57.56    4.56 
  -6  -3  -1   58.20    4.30 
   3  -6  -1   57.40    4.63 
  -3   6  -1   56.28    4.40 
   6   3  -1   58.25    4.51 
  -6  -3  -1   60.20    4.35 
   3  -6  -1   54.09    4.29 
  -6  -3  -1   57.32    4.27 
  -6  -3  -1   55.98    4.44 
   3  -6   1   66.35    4.75 
  -3   6   1   67.81    4.17 
  -6  -3   1   66.39    4.61 
  -6  -3   1   71.38    4.57 
  -3   6   1   61.23    4.45 
  -3   6   1   65.73    4.71 
   3  -6   1   72.90    4.19 
   3  -6   1   67.39    4.77 
  -6  -3   1   62.41    4.43 
   6   3   1   58.03    4.52 
   3  -6   1   72.90    4.26 
  -3   6   1   61.27    4.44 
  -6  -3   1   70.51    4.39 
  -6  -3   1   67.48    4.17 
  -6  -3   1   65.27    4.18 
  -6  -2  -1  109.72    6.96 
  -2   6  -1  109.65    7.16 
  -6  -2  -1  115.74    7.07 
   2  -6  -1  119.46    6.96 
  -2   6  -1  113.58    7.15 
  -6  -2  -1  112.16    6.94 
  -6  -2  -1  119.05    7.08 
   2  -6  -1  113.43    6.64 
  -6  -2  -1  107.97    7.14 
   2  -6  -1  107.41    6.99 
  -2   6  -1  121.51    7.11 
   2  -6  -1  111.68    7.27 
  -6  -2  -1  117.15    6.77 
   6   2  -1  104.05    7.12 
  -2   6  -1  115.12    6.61 
  -2   6   1  103.20    6.60 
  -6  -2   1  104.90    7.19 
  -6  -2   1  107.54    7.02 
   2  -6   1  100.81    6.54 
  -2   6   1   94.94    7.00 
  -6  -2   1  110.76    7.01 
   2  -6   1  118.84    6.90 
  -2   6   1  104.27    7.06 
  -6  -2   1  110.67    7.07 
   2  -6   1  105.53    7.24 
   6   2   1   96.60    7.09 
   6   2   1  117.02    6.82 
  -2   6   1  106.78    7.16 
   2  -6   1  100.70    6.91 
  -6  -2   1  110.72    7.00 
  -6  -1  -1  120.62    7.45 
   6   1  -1  136.93    7.43 
  -1   6  -1  117.90    7.91 
  -6  -1  -1  122.42    7.85 
  -1   6  -1  122.36    7.19 
   1  -6  -1  122.85    7.68 
   1  -6  -1  116.50    7.67 
  -6  -1  -1  126.33    7.80 
  -6  -1  -1  121.30    7.55 
   1  -6  -1  119.52    7.24 
  -6  -1  -1  132.85    7.89 
  -6  -1  -1  121.30    7.61 
   1  -6  -1  120.83    7.94 
  -1   6  -1  120.75    7.88 
   6   1  -1  121.20    7.99 
  -1   6  -1  119.09    7.82 
  -1   6   1  123.58    7.87 
   1  -6   1  138.98    7.75 
  -1   6   1  121.31    7.87 
  -1   6   1  126.82    7.28 
  -6  -1   1  129.01    7.82 
  -1   6   1  122.57    7.86 
   1  -6   1  127.46    7.79 
  -6  -1   1  119.02    7.97 
  -6  -1   1  125.02    7.35 
  -6  -1   1  129.54    7.86 
   1  -6   1  123.72    7.98 
  -6  -1   1  127.78    7.93 
   6   1   1  113.48    7.92 
   6   1   1  128.32    7.51 
   1  -6   1  123.04    7.19 
   0  -6  -1  113.51    7.49 
  -6   0  -1  119.26    7.32 
   6   0  -1  112.99    6.79 
   6   0  -1  119.96    7.06 
   0  -6  -1  123.22    7.23 
   0   6  -1  106.34    7.33 
   0   6  -1   97.90    7.27 
   0  -6  -1  119.97    7.24 
   0   6  -1  112.00    7.30 
  -6   0  -1  114.99    7.33 
  -6   0  -1  111.21    6.93 
   6   0  -1  125.34    7.57 
   0  -6  -1  108.31    6.56 
  -6   0  -1  111.93    6.92 
  -6   0   1  112.50    7.01 
  -6   0   1  120.28    7.33 
   0   6   1  112.82    6.59 
   0  -6   1  112.79    7.20 
   0   6   1  106.72    7.35 
   6   0   1  111.11    6.90 
   6   0   1  116.27    6.99 
   0   6   1  109.59    7.32 
   0  -6   1  121.38    7.24 
  -6   0   1  118.77    7.41 
  -6   0   1  117.47    6.80 
   6   0   1  117.24    7.25 
   0   6   1  116.02    7.38 
   0  -6   1  109.01    7.43 
  -6   1  -1  131.81    7.62 
   1   6  -1  129.66    8.11 
  -6   1  -1  126.90    7.58 
   6  -1  -1  121.23    8.11 
   1   6  -1  109.54    7.95 
  -1  -6  -1  124.81    7.15 
  -1  -6  -1  122.76    7.91 
   6  -1  -1  125.68    7.95 
   6  -1  -1  128.56    7.46 
  -6   1  -1  140.21    8.08 
   1   6  -1  128.48    8.05 
  -6   1  -1  126.48    8.00 
  -1  -6  -1  123.43    8.13 
  -1  -6  -1  127.83    7.85 
   6  -1  -1  129.35    7.68 
  -6   1   1  126.38    7.66 
  -1  -6   1  126.49    7.91 
  -1  -6   1  123.96    8.14 
   6  -1   1  126.99    7.58 
   6  -1   1  133.22    8.23 
   6  -1   1  126.40    7.90 
  -6   1   1  119.72    7.97 
  -6   1   1  131.75    7.52 
   6  -1   1  127.84    7.58 
   1   6   1  119.41    8.00 
   1   6   1  117.37    8.02 
  -6   1   1  130.90    8.03 
   1   6   1  124.44    7.99 
  -1  -6   1  125.24    7.91 
   6  -2  -1  104.92    7.01 
  -2  -6  -1  107.75    7.24 
  -6   2  -1  103.81    6.63 
   2   6  -1  101.22    7.18 
   2   6  -1  110.78    7.29 
  -2  -6  -1  109.02    7.07 
  -6   2  -1  113.90    6.78 
   6  -2  -1   90.30    7.17 
  -6   2  -1  116.96    7.16 
   6  -2  -1  107.24    6.59 
  -2  -6  -1  103.71    6.30 
  -6   2  -1  105.10    7.09 
  -2  -6  -1  106.74    6.33 
   6  -2  -1  101.62    6.68 
  -2  -6  -1  110.65    6.99 
   2   6  -1  105.64    7.09 
   2   6   1  117.41    7.23 
  -2  -6   1  116.26    7.32 
   6  -2   1  111.62    6.72 
  -2  -6   1  121.52    7.13 
  -6   2   1  114.04    6.78 
   6  -2   1  108.07    7.27 
   2   6   1  114.02    7.23 
   6  -2   1  116.63    7.06 
  -6   2   1  123.49    7.20 
  -6   2   1  108.27    7.12 
   2   6   1  101.45    7.17 
  -2  -6   1  118.38    7.11 
   6  -2   1  113.44    6.66 
   3   6  -1   70.36    4.63 
  -6   3  -1   67.98    4.73 
  -3  -6  -1   72.04    4.57 
  -6   3  -1   70.37    4.35 
  -3  -6  -1   67.20    3.89 
  -3  -6  -1   63.91    4.74 
   6  -3  -1   70.77    4.21 
  -6   3  -1   65.56    4.57 
  -6   3  -1   68.60    4.10 
   6  -3  -1   68.27    4.17 
   6  -3  -1   65.84    4.87 
  -3  -6  -1   67.55    4.63 
   3   6  -1   69.04    4.86 
  -3  -6  -1   70.77    3.88 
   6  -3  -1   62.62    4.61 
   3   6  -1   64.24    4.79 
   3   6   1   57.10    4.66 
   6  -3   1   58.25    4.01 
  -3  -6   1   56.08    4.43 
   3   6   1   56.16    4.64 
  -3  -6   1   57.48    3.74 
  -6   3   1   55.64    4.36 
  -3  -6   1   55.47    3.71 
  -3  -6   1   59.83    4.92 
   6  -3   1   55.83    4.11 
  -3  -6   1   57.25    4.66 
  -6   3   1   53.03    4.10 
  -6   3   1   51.18    4.56 
   6  -3   1   57.08    4.31 
   6  -3   1   51.82    4.68 
   3   6   1   61.86    4.58 
   4   6  -1   94.42    6.17 
  -4  -6  -1   90.93    5.57 
  -4  -6  -1   97.21    6.17 
  -4  -6  -1   92.05    6.40 
   6  -4  -1   93.83    5.76 
   6  -4  -1   95.60    6.15 
  -6   4  -1   88.94    5.64 
  -6   4  -1   95.13    6.08 
   6  -4  -1  106.41    6.55 
  -6   4  -1   86.24    6.20 
  -6   4  -1   85.07    5.87 
   4   6  -1   85.91    6.34 
  -4  -6  -1   97.61    5.55 
  -4  -6  -1   85.77    5.98 
   4   6  -1   89.12    6.38 
   6  -4   1   91.37    6.07 
   6  -4   1   90.90    5.63 
  -4  -6   1   81.25    6.05 
  -4  -6   1   86.11    6.18 
  -4  -6   1   89.25    5.44 
  -6   4   1   83.47    5.82 
  -6   4   1   88.85    6.26 
   4   6   1   84.06    6.28 
  -6   4   1   91.23    5.84 
   6  -4   1   86.26    5.99 
  -6   4   1   82.09    6.06 
   4   6   1   85.56    6.29 
   6  -4   1   86.43    6.32 
  -5  -6  -1   42.16    3.93 
  -5  -6  -1   38.11    3.77 
  -6   5  -1   43.78    4.05 
  -5  -6  -1   46.67    3.72 
   6  -5  -1   44.49    3.34 
  -6   5  -1   41.44    3.60 
  -5  -6  -1   43.23    3.20 
  -5  -6  -1   43.90    4.08 
   6  -5  -1   41.12    3.49 
   6  -5  -1   40.62    3.95 
   5   6  -1   45.97    4.19 
   6  -5  -1   44.95    3.66 
  -6   5  -1   43.67    3.56 
  -5  -6  -1   41.57    3.23 
   5   6  -1   45.00    4.14 
  -6   5   1   43.44    3.62 
   6  -5   1   43.59    3.65 
   6  -5   1   47.25    4.04 
  -5  -6   1   53.79    3.84 
  -6   5   1   47.11    3.54 
   6  -5   1   47.67    3.84 
  -6   5   1   46.85    4.01 
  -5  -6   1   51.01    3.83 
  -6   5   1   44.16    3.95 
   5   6   1   50.01    4.10 
  -5  -6   1   44.01    3.98 
   5   6   1   43.39    4.16 
   6  -5   1   42.52    3.22 
  -5  -6   1   50.74    3.23 
  -6  -6  -1   13.00    1.98 
   6  -6  -1   11.76    2.21 
  -6  -6  -1   12.02    2.15 
   6  -6  -1    8.35    1.64 
  -6   6  -1   15.11    2.23 
   6  -6  -1   13.11    1.90 
  -6  -6  -1   10.42    1.71 
   6  -6  -1   16.02    2.34 
   6   6  -1   12.08    2.43 
  -6   6  -1   12.40    1.93 
  -6   6  -1   10.11    2.15 
  -6  -6  -1   13.27    2.23 
  -6  -6  -1    9.96    1.99 
  -6   6  -1   13.11    1.92 
  -6   6   1    9.44    2.17 
  -6  -6   1   10.38    1.72 
   6   6   1   12.96    2.32 
  -6   6   1   12.78    2.10 
   6  -6   1   12.94    2.20 
  -6   6   1   11.34    2.02 
  -6   6   1   14.04    2.36 
   6  -6   1   13.09    1.64 
  -6  -6   1   13.24    1.74 
  -6  -6   1   14.26    2.33 
   6   6   1   12.89    2.56 
  -6  -6   1   12.61    2.25 
   6  -6   1   18.29    2.08 
  -6  -6   1    9.58    1.88 
   6  -6   1   12.84    2.19 
   7   6  -1   47.67    4.29 
  -6   7  -1   39.32    3.46 
   6  -7  -1   39.00    3.99 
  -6   7  -1   41.76    4.35 
  -7  -6  -1   39.96    3.90 
   7   6  -1   42.72    3.72 
  -6   7  -1   47.04    3.80 
  -7  -6  -1   42.74    3.40 
  -7  -6  -1   50.28    3.76 
  -7  -6  -1   40.87    3.77 
   6  -7  -1   45.44    3.41 
   6  -7  -1   42.05    4.12 
  -7  -6  -1   40.80    4.10 
  -6   7  -1   41.58    3.91 
   7   6   1   37.95    4.10 
  -7  -6   1   36.91    4.27 
  -6   7   1   46.08    3.65 
  -6   7   1   36.46    4.26 
  -7  -6   1   37.67    3.30 
  -7  -6   1   36.43    3.56 
   6  -7   1   38.58    4.06 
  -6   7   1   36.90    3.78 
   6  -7   1   30.78    3.90 
  -7  -6   1   38.73    4.02 
  -6   7   1   35.42    3.66 
   5  -7  -1   52.61    4.29 
  -7  -5  -1   51.32    4.67 
   5  -7  -1   54.10    4.63 
   5  -7  -1   56.07    4.82 
  -7  -5  -1   54.66    4.54 
  -5   7  -1   54.67    4.94 
  -5   7  -1   53.53    4.45 
  -7  -5  -1   46.27    4.38 
  -5   7  -1   52.53    4.18 
  -7  -5  -1   56.23    4.26 
   5  -7  -1   51.77    4.11 
  -5   7  -1   50.60    4.51 
   7   5  -1   46.70    4.68 
   7   5  -1   58.55    4.65 
   5  -7   1   63.56    4.19 
  -5   7   1   64.91    4.63 
  -5   7   1   59.12    4.84 
  -7  -5   1   63.88    4.94 
   7   5   1   61.20    4.90 
   5  -7   1   58.74    4.40 
   7   5   1   64.58    4.78 
  -7  -5   1   62.09    4.32 
  -5   7   1   55.80    4.58 
  -7  -5   1   63.39    4.34 
  -5   7   1   67.83    4.43 
  -7  -5   1   65.21    4.73 
  -7  -5   1   61.50    4.67 
  -7  -5   1   61.29    4.65 
   5  -7   1   61.18    4.62 
   5  -7   1   63.46    4.98 
   7   4  -1   66.40    5.20 
  -7  -4  -1   67.81    5.22 
   4  -7  -1   66.48    4.98 
  -7  -4  -1   61.88    4.98 
  -4   7  -1   68.97    5.43 
  -4   7  -1   69.35    4.73 
   7   4  -1   67.57    5.36 
  -4   7  -1   58.53    5.03 
   4  -7  -1   69.97    5.02 
  -4   7  -1   65.50    5.20 
  -7  -4  -1   75.79    4.97 
  -7  -4  -1   65.14    5.12 
   4  -7  -1   63.85    5.32 
  -7  -4  -1   64.84    5.05 
  -7  -4  -1   73.57    5.03 
   4  -7   1   74.42    5.01 
  -7  -4   1   71.99    5.18 
   4  -7   1   71.02    4.77 
   4  -7   1   69.96    5.41 
  -7  -4   1   80.56    4.87 
  -4   7   1   71.11    5.50 
  -4   7   1   68.96    5.20 
   7   4   1   72.78    5.32 
  -7  -4   1   69.60    4.97 
  -4   7   1   68.54    4.79 
  -7  -4   1   82.57    5.26 
  -7  -4   1   74.26    5.08 
  -7  -4   1   72.36    5.33 
   4  -7   1   67.72    5.00 
  -4   7   1   72.13    5.20 
  -7  -3  -1   55.62    4.82 
  -7  -3  -1   67.61    4.89 
   3  -7  -1   62.06    4.53 
  -7  -3  -1   70.05    4.72 
   3  -7  -1   57.54    4.79 
  -7  -3  -1   60.45    5.05 
   3  -7  -1   62.41    5.28 
   7   3  -1   60.79    5.12 
  -3   7  -1   62.75    4.99 
  -3   7  -1   59.80    5.13 
  -7  -3  -1   65.54    5.00 
  -3   7  -1   66.65    4.51 
   3  -7  -1   68.75    4.89 
  -7  -3  -1   60.49    4.84 
  -3   7  -1   63.73    5.02 
   7   3   1   75.97    5.27 
  -3   7   1   78.25    5.28 
  -3   7   1   81.14    4.67 
  -3   7   1   76.69    5.19 
  -7  -3   1   80.27    5.04 
   3  -7   1   79.82    5.10 
   3  -7   1   74.94    4.60 
  -3   7   1   81.91    5.50 
  -7  -3   1   72.53    4.66 
   3  -7   1   82.18    5.54 
  -7  -3   1   73.66    5.17 
  -7  -3   1   72.05    4.76 
  -7  -3   1   73.27    5.09 
  -7  -2  -1   79.74    5.39 
  -7  -2  -1   74.48    5.52 
   2  -7  -1   76.63    5.40 
  -2   7  -1   75.35    5.77 
   7   2  -1   77.90    5.80 
  -2   7  -1   80.05    5.65 
  -2   7  -1   69.98    5.51 
  -7  -2  -1   80.23    5.18 
  -7  -2  -1   72.43    5.43 
  -7  -2  -1   73.40    5.40 
   2  -7  -1   77.46    4.98 
  -2   7  -1   78.44    4.93 
  -7  -2  -1   75.30    5.74 
   2  -7  -1   77.54    5.86 
   2  -7  -1   74.40    5.36 
  -7  -2   1   77.96    5.49 
   2  -7   1   78.73    4.95 
  -7  -2   1   85.48    5.60 
  -2   7   1   84.99    5.68 
   7   2   1   87.29    5.87 
   2  -7   1   78.90    5.80 
  -7  -2   1   87.77    5.86 
   2  -7   1   89.27    5.39 
  -7  -2   1   86.25    5.52 
  -7  -2   1   78.95    5.50 
  -2   7   1   80.36    5.70 
   2  -7   1   79.73    5.42 
  -7  -2   1   89.14    5.15 
  -2   7   1   79.63    4.98 
  -2   7   1   85.22    5.79 
   7   2   1   84.90    5.33 
  -1   7  -1   96.70    6.20 
   1  -7  -1   81.88    6.20 
  -7  -1  -1   89.01    6.11 
   7   1  -1   86.86    6.30 
  -7  -1  -1   94.93    5.83 
  -1   7  -1   89.32    6.11 
  -7  -1  -1   88.79    5.80 
  -7  -1  -1   91.60    5.60 
   1  -7  -1   96.16    6.00 
  -7  -1  -1   84.46    5.92 
  -1   7  -1   86.91    6.13 
   1  -7  -1   84.68    5.28 
  -1   7  -1   89.02    5.21 
   7   1  -1   86.16    5.46 
   1  -7   1   92.37    5.95 
   1  -7   1   85.79    6.27 
  -1   7   1   92.62    6.08 
   1  -7   1   86.50    5.80 
   7   1   1   92.56    5.63 
  -7  -1   1   86.60    5.85 
  -1   7   1   84.33    6.16 
  -7  -1   1   83.83    6.14 
  -1   7   1   93.54    6.21 
   7   1   1   78.35    6.18 
  -1   7   1   87.34    5.28 
   1  -7   1   84.33    5.20 
   0   7  -1  157.17    9.94 
   0  -7  -1  155.09    8.94 
   7   0  -1  154.41    9.53 
   7   0  -1  153.81   10.07 
   7   0  -1  168.39    9.29 
   0  -7  -1  160.66    9.78 
  -7   0  -1  163.13    9.40 
   0   7  -1  149.41    9.94 
   0   7  -1  156.84    9.95 
  -7   0  -1  156.98    9.90 
   0  -7  -1  153.81   10.06 
  -7   0  -1  152.42    9.89 
   7   0   1  162.54   10.08 
   7   0   1  160.87    9.52 
  -7   0   1  166.38    9.99 
   0  -7   1  146.04    9.63 
  -7   0   1  144.05   10.11 
   7   0   1  164.98    9.41 
  -7   0   1  157.48    9.59 
   0  -7   1  160.08   10.13 
   0   7   1  156.68    9.94 
   0  -7   1  162.62   10.14 
   0   7   1  161.37    8.97 
   0   7   1  162.65    9.93 
  -7   0   1  155.33    9.28 
   0   7   1  138.34    9.83 
  -7   1  -1   87.97    5.64 
  -1  -7  -1   92.09    6.47 
   1   7  -1   92.27    6.33 
  -1  -7  -1   85.80    5.94 
  -7   1  -1  100.22    6.20 
   7  -1  -1   88.47    6.05 
   1   7  -1   84.66    6.25 
  -1  -7  -1   77.99    5.91 
   7  -1  -1   92.62    5.54 
  -7   1  -1   86.72    5.67 
   7  -1  -1   86.28    6.34 
   1   7  -1   86.33    6.12 
   7  -1  -1   95.50    5.80 
  -7   1  -1   86.73    6.14 
  -1  -7   1   97.62    6.43 
   7  -1   1   86.28    6.35 
   7  -1   1   92.17    5.69 
   1   7   1   86.36    6.33 
   1   7   1   88.53    6.12 
  -7   1   1   92.71    6.31 
  -7   1   1   94.87    6.13 
   7  -1   1   88.02    5.64 
  -1  -7   1   88.09    6.37 
   1   7   1   91.09    6.26 
   7  -1   1   94.43    6.49 
  -7   1   1   86.88    5.83 
  -1  -7   1   96.46    6.53 
   2   7  -1   79.09    5.75 
   7  -2  -1   83.22    5.43 
  -2  -7  -1   78.60    5.76 
   7  -2  -1   81.50    5.87 
   7  -2  -1   86.05    4.93 
  -7   2  -1   79.93    5.45 
  -7   2  -1   75.16    5.55 
   7  -2  -1   78.36    5.05 
   2   7  -1   76.37    5.71 
  -2  -7  -1   75.02    5.37 
   2   7  -1   88.41    5.60 
  -7   2  -1   83.14    5.13 
  -7   2  -1   78.92    4.97 
   7  -2   1   63.81    5.55 
   7  -2   1   77.92    5.31 
  -2  -7   1   73.77    5.72 
  -2  -7   1   77.60    5.41 
   2   7   1   74.64    5.61 
  -7   2   1   71.39    5.36 
  -7   2   1   75.18    5.20 
   7  -2   1   72.28    4.91 
  -7   2   1   79.00    4.98 
  -7   2   1   74.25    5.50 
   2   7   1   70.34    5.54 
  -2  -7   1   70.19    5.27 
   7  -2   1   78.80    5.01 
   2   7   1   78.15    5.52 
   7  -3  -1   79.22    5.64 
   3   7  -1   76.43    5.61 
  -7   3  -1   70.55    5.15 
   7  -3  -1   83.50    4.71 
   3   7  -1   86.21    5.39 
   7  -3  -1   82.88    4.76 
  -3  -7  -1   80.63    5.08 
   3   7  -1   77.48    5.52 
  -7   3  -1   73.72    5.32 
  -7   3  -1   81.62    4.94 
  -3  -7  -1   80.24    5.49 
  -7   3  -1   67.35    4.93 
  -3  -7  -1   78.54    5.14 
   3   7   1   63.76    5.29 
  -3  -7   1   59.59    4.97 
  -3  -7   1   65.30    4.08 
  -7   3   1   67.34    5.29 
  -3  -7   1   64.37    4.06 
  -3  -7   1   63.04    4.96 
  -7   3   1   67.18    4.67 
  -3  -7   1   62.15    5.26 
  -7   3   1   63.85    4.85 
   7  -3   1   63.55    4.89 
   7  -3   1   64.66    5.46 
   3   7   1   66.37    5.15 
  -7   3   1   60.63    4.99 
   7  -3   1   58.32    4.73 
   3   7   1   68.93    5.38 
  -7   4  -1   74.41    4.93 
  -4  -7  -1   70.58    4.51 
  -4  -7  -1   77.30    5.29 
   4   7  -1   75.58    5.68 
   7  -4  -1   72.51    4.83 
  -7   4  -1   76.26    5.10 
   4   7  -1   67.30    5.58 
  -7   4  -1   72.00    5.48 
  -7   4  -1   65.10    5.13 
   7  -4  -1   80.38    5.37 
  -4  -7  -1   77.30    5.31 
   7  -4  -1   69.40    5.64 
   7  -4  -1   73.04    5.01 
  -4  -7  -1   76.66    5.72 
  -4  -7  -1   71.83    4.46 
   4   7  -1   77.75    5.37 
  -4  -7   1   66.77    4.40 
  -7   4   1   69.21    5.25 
  -4  -7   1   72.48    4.39 
  -4  -7   1   71.60    5.24 
  -7   4   1   67.85    5.56 
   4   7   1   68.95    5.43 
  -4  -7   1   68.49    5.49 
   7  -4   1   66.21    5.60 
   7  -4   1   73.46    5.09 
   4   7   1   70.19    5.59 
   7  -4   1   68.86    5.02 
  -4  -7   1   71.37    5.33 
  -7   4   1   70.43    5.01 
   7  -4   1   69.57    4.70 
  -7   4   1   69.79    4.89 
  -5  -7  -1   57.19    4.52 
   7  -5  -1   59.94    4.18 
   7  -5  -1   61.06    5.09 
  -5  -7  -1   64.51    4.02 
  -7   5  -1   68.50    4.64 
  -7   5  -1   58.19    4.84 
   5   7  -1   63.52    5.13 
   5   7  -1   64.39    5.07 
  -5  -7  -1   62.02    4.71 
   7  -5  -1   63.76    4.68 
  -7   5  -1   66.86    4.60 
   7  -5  -1   64.10    4.54 
  -5  -7  -1   64.84    4.77 
  -5  -7  -1   60.60    5.03 
  -7   5  -1   62.43    4.40 
  -5  -7  -1   66.11    3.97 
   5   7   1   49.68    4.83 
   7  -5   1   50.97    4.27 
  -5  -7   1   52.75    3.87 
   7  -5   1   49.45    4.49 
   7  -5   1   56.08    4.03 
   7  -5   1   54.72    4.90 
  -5  -7   1   54.44    4.88 
  -7   5   1   52.87    4.32 
  -7   5   1   58.00    4.47 
  -5  -7   1   56.71    4.57 
  -5  -7   1   46.49    4.65 
  -7   5   1   55.85    4.52 
   5   7   1   53.11    5.01 
  -6  -7  -1   39.60    4.14 
  -7   6  -1   36.75    4.25 
   6   7  -1   33.07    4.13 
  -6  -7  -1   45.71    3.80 
  -6  -7  -1   37.09    3.12 
  -7   6  -1   39.83    3.71 
   7  -6  -1   31.32    4.13 
  -7   6  -1   36.18    3.60 
   6   7  -1   39.68    4.36 
   7  -6  -1   38.07    3.28 
   7  -6  -1   37.88    3.76 
  -7   6  -1   35.22    3.53 
  -6  -7  -1   38.39    3.75 
   7  -6   1   42.29    3.20 
   6   7   1   41.72    4.31 
  -6  -7   1   42.26    3.89 
  -6  -7   1   38.41    4.11 
   7  -6   1   40.85    4.19 
  -6  -7   1   42.40    3.13 
  -7   6   1   43.23    4.34 
  -7   6   1   40.44    3.82 
   7  -6   1   43.92    4.01 
  -7   6   1   36.71    3.53 
  -6  -7   1   41.14    4.08 
  -7   6   1   39.33    3.66 
   6   7   1   45.77    4.61 
   7  -7  -1   30.54    3.50 
  -7   7  -1   21.86    3.31 
   7  -7  -1   33.32    4.01 
  -7   7  -1   29.41    4.07 
  -7   7  -1   27.88    3.33 
   7  -7  -1   27.89    2.84 
  -7   7  -1   27.04    3.16 
  -7  -7  -1   24.18    3.34 
  -7  -7  -1   28.27    2.76 
  -7  -7  -1   27.66    3.22 
   7   7  -1   22.76    3.77 
  -7  -7  -1   29.24    3.97 
  -7   7   1   32.42    4.19 
   7   7   1   28.98    3.92 
  -7   7   1   30.57    3.08 
  -7   7   1   27.92    3.34 
   7  -7   1   21.79    3.85 
   7  -7   1   30.08    3.78 
   7  -7   1   32.70    2.78 
  -7  -7   1   29.51    3.38 
  -7  -7   1   27.25    3.84 
  -7  -7   1   30.47    2.79 
  -7   7   1   29.14    3.49 
   7  -8  -1   -0.70    1.87 
  -7   8  -1    1.54    1.79 
  -7   8  -1   -2.62    1.54 
   7  -8  -1    2.10    1.73 
  -8  -7  -1    0.01    2.10 
   7  -8  -1   -1.73    1.37 
   8   7  -1    0.96    1.80 
  -8  -7  -1    0.87    1.38 
  -8  -7  -1   -0.21    1.51 
  -7   8  -1   -0.09    2.14 
   8   7   1    3.93    2.42 
   7  -8   1    1.59    1.94 
  -7   8   1    2.77    1.64 
   7  -8   1    0.55    1.29 
  -7   8   1    3.72    1.99 
  -8  -7   1    3.77    2.26 
   7  -8   1    3.12    1.96 
  -8  -7   1    1.97    1.99 
  -8  -7   1    4.93    1.98 
  -7   8   1    3.23    2.26 
  -8  -6  -1   34.92    3.99 
  -6   8  -1   39.04    4.31 
  -8  -6  -1   31.83    4.14 
   6  -8  -1   32.57    3.15 
  -8  -6  -1   32.91    3.27 
  -8  -6  -1   29.52    3.38 
  -6   8  -1   33.82    3.19 
   6  -8  -1   36.38    4.00 
   8   6  -1   34.94    4.05 
   8   6  -1   31.00    3.66 
  -6   8  -1   30.53    3.62 
   6  -8  -1   23.80    3.70 
   6  -8   1   33.15    4.08 
  -6   8   1   28.31    3.59 
   6  -8   1   32.43    3.04 
   8   6   1   32.14    4.15 
  -8  -6   1   30.52    3.30 
  -8  -6   1   34.97    3.96 
  -8  -6   1   32.27    4.02 
  -6   8   1   33.19    3.20 
  -8  -6   1   24.62    3.19 
  -6   8   1   31.32    3.89 
   6  -8   1   37.13    3.92 
  -6   8   1   36.30    4.19 
  -8  -5  -1   43.68    4.25 
  -8  -5  -1   37.22    3.73 
  -5   8  -1   45.84    3.96 
   8   5  -1   42.12    4.07 
  -8  -5  -1   42.06    3.83 
  -5   8  -1   38.72    3.85 
   5  -8  -1   40.84    4.27 
   8   5  -1   43.86    4.08 
  -8  -5  -1   40.52    3.65 
   5  -8  -1   44.26    4.03 
  -5   8  -1   43.83    4.38 
   5  -8  -1   38.63    3.41 
  -8  -5  -1   41.84    4.07 
  -5   8  -1   48.54    3.48 
  -8  -5  -1   48.40    3.76 
   5  -8   1   37.54    4.21 
   5  -8   1   38.53    3.81 
  -8  -5   1   36.68    3.58 
  -5   8   1   38.62    4.01 
  -5   8   1   33.99    3.83 
  -5   8   1   38.43    3.34 
  -5   8   1   34.18    4.28 
  -8  -5   1   35.71    3.42 
   8   5   1   36.41    3.94 
  -8  -5   1   37.41    3.80 
   5  -8   1   41.41    3.41 
  -8  -5   1   34.48    3.93 
  -4   8  -1   77.70    5.37 
   4  -8  -1   86.62    5.72 
  -8  -4  -1   88.82    5.92 
  -4   8  -1   85.58    6.29 
   4  -8  -1   86.16    5.64 
  -8  -4  -1   87.91    5.99 
  -8  -4  -1   80.91    5.91 
   4  -8  -1   83.39    6.29 
  -4   8  -1   83.11    6.06 
   8   4  -1   88.96    6.20 
  -8  -4  -1   83.58    5.93 
  -8  -4  -1   73.62    5.51 
  -4   8  -1   81.76    5.97 
  -8  -4  -1   86.92    6.02 
  -8  -4   1   79.67    5.85 
  -8  -4   1   76.63    5.91 
  -8  -4   1   74.47    5.94 
  -4   8   1   80.39    6.20 
   8   4   1   74.46    6.05 
  -8  -4   1   77.55    5.94 
   4  -8   1   75.68    6.18 
  -8  -4   1   80.79    5.45 
  -4   8   1   69.86    5.84 
  -4   8   1   79.99    6.07 
  -8  -4   1   77.17    5.74 
  -4   8   1   80.68    5.41 
   4  -8   1   88.26    5.68 
   4  -8   1   76.63    5.45 
   3  -8  -1  109.89    7.69 
   3  -8  -1  109.17    7.10 
   8   3  -1  108.54    7.66 
  -3   8  -1  104.81    7.42 
   3  -8  -1  105.79    7.20 
  -8  -3  -1  108.87    7.32 
  -8  -3  -1  108.74    7.30 
  -3   8  -1  114.99    7.42 
   3  -8  -1   99.69    6.71 
  -8  -3  -1  106.93    6.94 
  -3   8  -1  105.57    7.54 
  -8  -3  -1   98.80    7.24 
  -3   8  -1  111.27    6.73 
  -8  -3  -1  104.06    7.49 
  -8  -3  -1   94.81    7.18 
  -3   8   1  103.10    7.54 
  -8  -3   1  112.83    7.10 
  -8  -3   1  111.02    7.42 
   3  -8   1  104.13    7.29 
  -3   8   1  107.43    6.75 
   8   3   1  114.30    7.68 
  -8  -3   1  111.36    7.64 
   3  -8   1  115.84    7.10 
  -8  -3   1  103.88    6.81 
  -8  -3   1  116.77    7.32 
  -8  -3   1  111.25    7.44 
  -8  -3   1  116.03    7.38 
   3  -8   1  106.47    6.71 
   3  -8   1  113.23    7.74 
  -3   8   1  115.63    7.52 
  -8  -2  -1   88.12    5.75 
  -8  -2  -1   88.39    5.81 
  -2   8  -1   79.31    5.94 
  -2   8  -1   82.70    5.92 
  -8  -2  -1   83.03    6.01 
   8   2  -1   90.22    6.22 
   2  -8  -1   83.62    5.08 
  -8  -2  -1   88.04    5.40 
  -2   8  -1   87.75    6.19 
  -8  -2  -1   88.16    5.74 
   2  -8  -1   82.96    5.66 
  -8  -2  -1   91.90    5.89 
   2  -8  -1   89.56    5.84 
   2  -8  -1   86.24    6.32 
  -2   8  -1   81.62    5.01 
   2  -8   1   76.86    5.00 
  -8  -2   1   82.26    5.79 
   2  -8   1   74.16    5.62 
  -2   8   1   81.37    5.92 
   8   2   1   76.45    5.49 
   8   2   1   73.48    6.02 
  -8  -2   1   77.83    5.80 
  -2   8   1   77.54    5.09 
  -8  -2   1   71.27    5.99 
  -2   8   1   71.02    5.70 
  -8  -2   1   70.94    5.62 
   2  -8   1   83.38    6.26 
  -2   8   1   76.72    6.08 
   2  -8   1   80.08    5.47 
  -8  -2   1   77.61    5.19 
  -8  -2   1   73.40    5.70 
  -8  -1  -1  134.65    9.55 
  -8  -1  -1  154.43    9.13 
   1  -8  -1  152.45    9.55 
  -1   8  -1  146.23    8.65 
   8   1  -1  157.74    9.06 
   1  -8  -1  134.16    9.37 
  -1   8  -1  146.53    9.76 
   1  -8  -1  153.75    9.96 
  -1   8  -1  150.27    9.75 
  -8  -1  -1  143.25    9.33 
  -1   8  -1  136.75    9.60 
   1  -8  -1  149.47    8.74 
  -8  -1  -1  146.11    9.38 
   8   1  -1  155.22    9.94 
  -8  -1  -1  154.48    9.76 
  -8  -1  -1  152.32    9.59 
  -8  -1   1  159.86    9.02 
   1  -8   1  150.84    9.55 
  -8  -1   1  156.53    9.85 
   1  -8   1  161.31   10.08 
  -8  -1   1  146.48    9.42 
  -8  -1   1  156.19    9.65 
  -1   8   1  158.22    8.79 
  -1   8   1  159.05    9.88 
  -1   8   1  149.09    9.82 
  -8  -1   1  140.51    9.57 
  -1   8   1  152.83    9.78 
   1  -8   1  167.81    9.57 
   8   1   1  141.31    9.82 
   0  -8  -1  194.84   11.58 
   8   0  -1  179.94   11.37 
   0  -8  -1  190.13   12.01 
   0  -8  -1  186.34   11.55 
  -8   0  -1  198.77   11.80 
  -8   0  -1  191.06   11.18 
   0   8  -1  177.78   11.84 
   0   8  -1  173.79   11.80 
  -8   0  -1  183.33   11.32 
   8   0  -1  180.77   11.98 
   0   8  -1  188.06   11.91 
   8   0  -1  189.87   11.06 
  -8   0  -1  180.24   11.72 
  -8   0   1  183.76   11.41 
   0  -8   1  183.40   11.53 
   0  -8   1  189.40   11.60 
   8   0   1  187.87   11.42 
  -8   0   1  199.77   11.09 
  -8   0   1  199.43   11.79 
  -8   0   1  191.94   11.88 
   0   8   1  191.02   10.63 
   0   8   1  189.46   11.88 
   0   8   1  192.19   11.90 
   8   0   1  195.88   12.10 
   0   8   1  179.66   11.81 
   0  -8   1  185.32   11.95 
   8  -1  -1  154.86    9.30 
   8  -1  -1  165.68    9.05 
   1   8  -1  157.71    9.84 
   1   8  -1  143.51    9.68 
  -1  -8  -1  162.02    9.61 
   1   8  -1  143.97    9.81 
  -8   1  -1  145.53    9.71 
  -8   1  -1  157.87    9.19 
  -1  -8  -1  154.79   10.08 
   8  -1  -1  154.57   10.09 
  -1  -8  -1  168.52    9.71 
  -8   1  -1  159.23    9.31 
   8  -1  -1  153.68    9.68 
  -8   1  -1  148.97    9.69 
   1   8   1  135.26    9.82 
  -8   1   1  154.74    9.07 
  -1  -8   1  138.12    9.54 
  -1  -8   1  157.90   10.04 
  -1  -8   1  147.81    9.58 
  -8   1   1  133.76    9.64 
   8  -1   1  159.00    9.22 
  -8   1   1  137.82    9.31 
  -8   1   1  147.50    9.79 
   1   8   1  151.46    9.84 
   1   8   1  155.12    9.86 
   8  -1   1  145.03   10.02 
   8  -1   1  139.36    9.48 
   8  -2  -1   78.45    6.35 
   8  -2  -1   77.17    5.15 
  -2  -8  -1   74.67    5.70 
   8  -2  -1   77.86    5.35 
   2   8  -1   82.71    6.23 
   2   8  -1   69.62    6.05 
  -8   2  -1   76.30    5.45 
   2   8  -1   76.20    5.79 
  -8   2  -1   78.08    5.41 
  -2  -8  -1   85.34    5.75 
  -8   2  -1   73.10    5.88 
  -8   2  -1   82.28    5.98 
   8  -2  -1   76.98    5.76 
  -2  -8  -1   83.26    6.26 
  -8   2   1   82.53    6.00 
   2   8   1   84.67    6.21 
   8  -2   1   87.86    5.36 
  -2  -8   1   84.11    6.32 
   8  -2   1   83.05    6.30 
   2   8   1   88.40    6.01 
  -8   2   1   89.65    5.35 
   8  -2   1   88.03    5.81 
   2   8   1   89.51    6.18 
  -2  -8   1   80.89    5.82 
  -2  -8   1   79.73    5.71 
  -8   2   1   82.58    5.61 
   8  -2   1   83.87    5.47 
  -8   2   1   83.25    5.82 
   3   8  -1  113.36    7.93 
   8  -3  -1  118.42    7.54 
  -8   3  -1  116.76    7.16 
   8  -3  -1  111.84    7.95 
  -3  -8  -1  108.62    7.86 
   8  -3  -1  116.47    7.08 
  -3  -8  -1  113.97    6.38 
  -3  -8  -1  110.20    6.36 
  -8   3  -1  101.14    7.51 
  -8   3  -1  116.74    7.76 
  -3  -8  -1  114.64    7.51 
  -8   3  -1  117.56    7.21 
   3   8  -1  116.15    7.76 
   3   8  -1  103.62    7.85 
  -3  -8  -1  112.34    7.49 
   8  -3   1  100.11    7.33 
   8  -3   1  114.67    7.16 
   8  -3   1  129.53    8.17 
  -3  -8   1  105.74    7.42 
   3   8   1  102.67    7.86 
  -8   3   1  117.90    7.09 
  -8   3   1  105.40    7.69 
   3   8   1  104.79    7.64 
   3   8   1  102.55    7.74 
   8  -3   1  109.65    6.96 
  -8   3   1  112.83    7.27 
  -3  -8   1  117.35    8.01 
  -8   3   1  101.22    7.54 
  -4  -8  -1   84.49    6.46 
  -8   4  -1   81.19    6.34 
  -4  -8  -1   81.30    5.06 
   4   8  -1   83.01    6.07 
  -4  -8  -1   78.19    4.99 
  -4  -8  -1   79.70    5.94 
   8  -4  -1   81.56    6.69 
   8  -4  -1   82.98    5.54 
  -8   4  -1   83.68    5.69 
  -8   4  -1   81.44    6.04 
   4   8  -1   77.01    6.44 
  -8   4  -1   76.66    5.73 
   8  -4  -1   80.38    5.62 
   4   8  -1   77.85    6.42 
  -4  -8   1   87.79    4.92 
  -8   4   1   87.78    5.68 
  -4  -8   1   83.08    6.36 
   8  -4   1   85.92    5.78 
   8  -4   1   91.43    6.69 
   8  -4   1   90.09    5.48 
   4   8   1   82.81    6.39 
  -8   4   1   80.96    6.25 
  -4  -8   1   84.53    4.93 
  -4  -8   1   83.77    6.09 
   4   8   1   83.83    6.38 
  -8   4   1   85.02    5.87 
  -8   5  -1   39.64    3.60 
   5   8  -1   39.64    4.54 
   5   8  -1   43.00    4.53 
  -8   5  -1   37.23    4.27 
   8  -5  -1   41.34    4.52 
   8  -5  -1   40.04    3.66 
   8  -5  -1   38.59    3.58 
  -8   5  -1   38.36    3.73 
  -5  -8  -1   36.89    2.95 
  -5  -8  -1   35.90    3.86 
  -5  -8  -1   35.69    4.23 
  -8   5   1   39.90    3.55 
   5   8   1   43.04    4.59 
   8  -5   1   44.80    3.24 
   8  -5   1   41.95    3.83 
   5   8   1   45.91    4.51 
  -5  -8   1   44.06    2.90 
  -5  -8   1   42.73    2.91 
   8  -5   1   43.96    4.51 
  -5  -8   1   41.81    4.44 
  -8   5   1   43.91    4.40 
  -8   5   1   40.86    3.83 
  -8   6  -1   38.89    4.09 
   6   8  -1   33.57    4.10 
   8  -6  -1   31.77    2.98 
  -6  -8  -1   32.21    2.76 
  -8   6  -1   38.37    3.73 
   8  -6  -1   33.93    4.22 
   8  -6  -1   31.07    3.52 
   6   8  -1   33.36    4.42 
  -6  -8  -1   35.74    2.80 
  -6  -8  -1   31.17    4.15 
  -8   6  -1   32.76    3.43 
   6   8   1   29.18    4.06 
  -8   6   1   28.17    4.14 
  -6  -8   1   30.32    2.70 
  -8   6   1   30.79    3.56 
   8  -6   1   29.47    3.65 
   6   8   1   38.06    4.39 
   8  -6   1   29.73    4.17 
  -8   6   1   33.55    3.44 
  -6  -8   1   33.90    2.75 
  -6  -8   1   30.08    3.98 
  -7  -8  -1    2.00    1.28 
   8  -7  -1    2.55    1.35 
  -8   7  -1    3.65    1.90 
  -8   7  -1    3.79    1.79 
   8  -7  -1    4.55    2.16 
   8  -7  -1    2.03    1.73 
  -8   7  -1    5.40    2.36 
   7   8  -1    4.21    2.34 
  -7  -8  -1    4.98    1.72 
  -7  -8  -1    2.88    2.09 
   8  -7   1    0.19    1.68 
   7   8   1    3.76    2.44 
  -7  -8   1   -1.72    1.31 
   8  -7   1    0.70    1.17 
  -8   7   1   -0.10    1.55 
   8  -7   1   -0.06    1.85 
  -7  -8   1    1.79    2.01 
  -8   7   1   -2.00    1.57 
  -7  -8   1    1.40    1.28 
  -8   7   1    1.43    2.24 
   7   8   1    0.70    2.34 
  -8  -8  -1    1.09    1.62 
   8  -8  -1    2.10    2.09 
  -8   8  -1    0.21    2.26 
  -8  -8  -1   -1.39    2.19 
  -8   8  -1    0.64    1.85 
   8  -8  -1    0.90    2.16 
   8   8  -1    0.48    2.44 
   8  -8   1    0.82    1.98 
   8  -8   1    1.01    2.21 
  -8  -8   1    1.63    1.79 
  -8   8   1    0.46    2.61 
   8  -8   1    1.93    1.46 
  -8  -8   1    4.64    2.18 
  -8   8   1    0.24    1.91 
   8   8   1    0.10    2.19 
  -8  -8   1    2.31    1.38 
   9   8  -1    8.47    3.02 
  -9  -8  -1    5.96    3.08 
   8  -9  -1    6.09    2.41 
  -9  -8  -1    6.55    2.29 
   8  -9  -1    7.17    2.87 
  -9  -8  -1    5.88    2.07 
  -9  -8  -1    5.32    2.59 
  -8   9  -1    5.71    2.40 
  -8   9  -1    6.76    2.71 
   9   8   1    1.88    2.49 
  -8   9   1    5.75    2.96 
  -8   9   1    3.59    2.25 
   8  -9   1    3.87    2.53 
   8  -9   1    3.26    2.45 
  -9  -8   1    5.31    1.95 
  -9  -8   1    5.06    2.42 
  -9  -8   1    8.11    2.97 
  -7   9  -1    4.86    2.02 
   7  -9  -1    3.75    2.25 
  -9  -7  -1    4.15    2.42 
  -7   9  -1    4.29    2.21 
   9   7  -1    6.61    2.55 
  -9  -7  -1    4.24    2.18 
  -9  -7  -1    5.34    2.70 
  -7   9  -1    4.62    2.85 
  -9  -7  -1    2.99    1.81 
   7  -9  -1    7.26    2.31 
   7  -9   1    3.21    2.45 
   9   7   1    2.30    2.25 
  -9  -7   1    0.52    2.19 
  -7   9   1    5.35    2.33 
   7  -9   1    3.57    1.87 
  -9  -7   1    4.28    1.85 
  -9  -7   1    4.65    2.55 
  -7   9   1    4.04    2.16 
   7  -9   1    4.71    2.25 
  -9  -6  -1    5.37    1.86 
   9   6  -1    6.38    2.35 
  -9  -6  -1    8.17    2.48 
  -9  -6  -1   11.47    2.16 
  -6   9  -1   10.20    2.37 
  -9  -6  -1    9.98    2.45 
   6  -9  -1    8.94    2.36 
  -6   9  -1    9.77    1.81 
  -6   9  -1    9.95    2.75 
   6  -9  -1    8.91    2.59 
  -9  -6   1   11.03    2.09 
  -6   9   1    9.33    2.86 
  -9  -6   1   11.08    2.12 
  -6   9   1   10.20    1.80 
  -6   9   1    7.02    2.39 
  -9  -6   1    9.59    2.39 
  -9  -6   1    9.68    2.59 
   6  -9   1    8.29    2.53 
   6  -9   1    9.74    1.75 
   6  -9   1    6.91    2.14 
  -9  -5  -1   39.22    4.42 
   9   5  -1   36.05    4.30 
  -9  -5  -1   39.23    4.35 
   5  -9  -1   36.57    4.61 
  -5   9  -1   40.11    4.59 
  -5   9  -1   40.27    3.49 
  -9  -5  -1   36.06    3.73 
  -5   9  -1   40.50    4.44 
   5  -9  -1   34.03    3.99 
  -5   9   1   52.98    4.96 
   5  -9   1   49.11    4.95 
   9   5   1   42.86    4.53 
  -9  -5   1   49.90    4.28 
  -9  -5   1   49.03    4.67 
   5  -9   1   36.91    3.61 
  -5   9   1   51.54    4.68 
  -9  -5   1   46.23    4.08 
  -9  -5   1   43.53    3.74 
   5  -9   1   48.04    4.09 
   4  -9  -1   66.85    5.29 
  -9  -4  -1   80.68    6.28 
  -4   9  -1   77.93    5.13 
   9   4  -1   72.26    6.01 
  -4   9  -1   77.55    6.14 
  -9  -4  -1   81.65    5.96 
  -9  -4  -1   75.04    5.69 
   4  -9  -1   76.18    5.49 
  -9  -4  -1   80.21    5.80 
   4  -9  -1   77.88    6.31 
  -9  -4  -1   78.81    5.87 
  -9  -4  -1   81.26    5.81 
  -4   9  -1   76.77    6.02 
   4  -9   1   79.02    6.31 
   4  -9   1   79.87    5.41 
  -4   9   1   75.34    5.11 
  -9  -4   1   69.45    6.12 
  -4   9   1   77.11    6.02 
  -9  -4   1   68.32    5.57 
  -9  -4   1   74.18    5.93 
   9   4   1   68.12    6.01 
  -9  -4   1   66.98    5.66 
  -4   9   1   78.16    6.32 
  -9  -4   1   78.65    5.30 
   4  -9   1   74.70    5.35 
   9   3  -1  110.56    8.16 
  -3   9  -1  106.79    7.91 
   3  -9  -1  103.04    7.47 
   3  -9  -1  102.93    7.04 
  -9  -3  -1  110.71    7.74 
  -9  -3  -1  100.02    7.70 
  -9  -3  -1  115.05    7.77 
  -3   9  -1  108.75    6.98 
  -9  -3  -1  111.42    8.06 
  -9  -3  -1   99.29    7.22 
   3  -9  -1  101.43    8.19 
  -3   9  -1  108.38    8.06 
  -9  -3  -1  138.41   10.28 
  -9  -3   1  126.52    7.27 
   3  -9   1  111.66    7.49 
  -3   9   1  115.63    8.04 
  -9  -3   1  119.29    8.26 
  -3   9   1  124.10    8.37 
   3  -9   1  121.39    7.08 
  -9  -3   1  123.33    7.51 
  -9  -3   1  119.11    7.94 
  -9  -3   1  115.14    7.86 
  -3   9   1  124.37    7.15 
  -9  -3   1  106.23    7.81 
   9   3   1  136.12    8.49 
   3  -9   1  119.44    8.33 
  -9  -2  -1  100.84    6.94 
  -9  -2  -1   86.04    6.44 
  -9  -2  -1   95.62    6.58 
   9   2  -1   87.02    7.07 
  -2   9  -1  106.01    7.26 
   2  -9  -1   98.52    6.45 
  -2   9  -1   87.94    6.76 
  -9  -2  -1   86.33    6.61 
  -2   9  -1   93.40    5.67 
   2  -9  -1  102.24    7.39 
   2  -9  -1  101.78    5.77 
  -9  -2  -1   86.45    6.61 
  -9  -2  -1   97.98    6.11 
  -9  -2   1   89.92    6.61 
  -2   9   1   86.78    5.79 
   2  -9   1   91.46    7.10 
  -2   9   1   88.46    6.94 
   9   2   1   99.46    7.10 
  -9  -2   1   94.50    5.99 
   2  -9   1   91.08    6.36 
  -9  -2   1   84.72    6.57 
   2  -9   1   93.12    5.67 
   9   2   1   96.40    6.32 
  -9  -2   1   91.84    6.65 
  -2   9   1   88.55    6.82 
  -9  -2   1   92.13    6.85 
   9   1  -1  109.97    6.87 
  -9  -1  -1  102.92    7.64 
   1  -9  -1  113.12    8.04 
   9   1  -1  117.79    8.14 
  -1   9  -1  115.78    7.88 
   1  -9  -1  107.64    6.47 
  -9  -1  -1  104.50    7.46 
  -9  -1  -1  109.47    6.96 
   1  -9  -1   96.44    7.28 
  -9  -1  -1  107.43    7.31 
  -1   9  -1  112.67    7.92 
   9   1   1  107.78    7.15 
  -1   9   1  111.84    6.51 
  -9  -1   1  109.15    7.38 
   1  -9   1  113.41    8.13 
   1  -9   1  112.54    7.32 
  -1   9   1  106.19    7.87 
  -9  -1   1  118.10    6.90 
  -9  -1   1  134.79    9.78 
   9   1   1  108.47    8.05 
  -1   9   1  111.59    7.92 
  -9  -1   1  107.13    7.83 
   0  -9  -1  235.94   13.70 
   9   0  -1  221.21   12.45 
   0   9  -1  207.82   13.36 
  -9   0  -1  207.75   12.77 
   0   9  -1  200.04   13.31 
  -9   0  -1  202.64   13.24 
  -9   0  -1  217.57   12.59 
   9   0  -1  201.08   13.44 
   0  -9  -1  227.24   13.70 
   9   0  -1  208.29   12.82 
   0   9   1  198.25   13.35 
  -9   0   1  199.30   13.20 
   0  -9   1  220.66   13.11 
  -9   0   1  215.99   12.45 
  -9   0   1  211.48   12.86 
   9   0   1  213.44   13.58 
   0  -9   1  201.02   13.43 
   0   9   1  211.51   13.38 
  -9   0   1  215.85   13.77 
   9   0   1  206.68   12.63 
   1   9  -1  110.20    7.79 
  -1  -9  -1  117.61    8.24 
   9  -1  -1  115.12    6.83 
  -9   1  -1  116.11    7.04 
   1   9  -1  113.67    7.91 
  -9   1  -1  116.43    7.24 
  -1  -9  -1  107.09    7.41 
   9  -1  -1  114.02    8.06 
  -9   1  -1  112.92    7.74 
   9  -1   1  114.33    7.11 
   9  -1   1   98.99    7.47 
  -9   1   1  111.14    7.87 
   1   9   1  101.53    7.88 
   9  -1   1  107.16    7.03 
   1   9   1  105.33    7.82 
   9  -1   1  104.70    8.07 
  -9   1   1  105.99    6.88 
  -1  -9   1  107.53    8.02 
  -9   1   1  108.36    7.32 
  -2  -9  -1   91.23    7.19 
  -9   2  -1   90.12    6.91 
   9  -2  -1   98.86    7.26 
  -2  -9  -1   88.25    6.59 
   2   9  -1   89.98    7.08 
  -9   2  -1   94.39    6.16 
  -9   2  -1   95.55    6.31 
   2   9  -1   84.33    6.87 
   9  -2  -1   88.61    6.18 
  -2  -9   1   97.52    7.13 
   9  -2   1   93.77    6.08 
  -9   2   1   94.68    6.89 
  -9   2   1  100.25    6.12 
   9  -2   1   87.32    7.10 
  -9   2   1   98.91    6.49 
   2   9   1   87.93    6.87 
   2   9   1   98.25    7.15 
   9  -2   1   95.74    6.26 
  -3  -9  -1  125.05    8.69 
   3   9  -1  127.39    8.74 
  -9   3  -1  126.33    7.82 
  -9   3  -1  125.27    8.55 
   3   9  -1  122.42    8.65 
   9  -3  -1  131.84    7.66 
  -9   3  -1  128.82    7.81 
   9  -3  -1  136.96    9.01 
   9  -3   1  118.54    7.69 
   9  -3   1  103.91    7.44 
   9  -3   1  128.55    8.92 
  -9   3   1  120.78    7.60 
  -9   3   1  105.91    7.81 
   3   9   1  105.15    8.50 
   3   9   1  110.05    8.42 
  -9   3   1  111.45    8.28 
  -3  -9   1  112.34    8.65 
   9  -4  -1   71.98    5.31 
   4   9  -1   76.30    6.52 
   9  -4  -1   75.38    5.43 
  -9   4  -1   75.51    6.17 
   4   9  -1   73.19    6.23 
  -4  -9  -1   76.65    4.57 
  -4  -9  -1   78.35    4.56 
  -9   4  -1   71.55    5.51 
  -9   4  -1   83.86    6.26 
   9  -4  -1   80.59    6.69 
  -4  -9  -1   72.10    6.50 
   4   9   1   70.61    6.34 
   9  -4   1   79.26    5.61 
  -9   4   1   81.91    5.51 
  -4  -9   1   81.69    6.50 
   9  -4   1   87.01    5.31 
  -9   4   1   77.85    5.73 
   9  -4   1   86.80    6.86 
  -9   4   1   76.70    6.34 
   4   9   1   74.42    6.40 
  -5  -9  -1   48.96    3.07 
  -9   5  -1   55.40    4.14 
   9  -5  -1   49.77    4.07 
  -5  -9  -1   51.34    3.05 
  -5  -9  -1   50.17    5.09 
   5   9  -1   49.01    4.97 
   5   9  -1   51.29    5.07 
   9  -5  -1   50.31    4.98 
  -9   5  -1   44.32    4.84 
  -9   5  -1   53.19    4.26 
   9  -5  -1   45.22    3.64 
   5   9   1   36.06    4.48 
  -5  -9   1   33.60    4.77 
   9  -5   1   37.47    4.02 
  -5  -9   1   36.81    2.86 
   5   9   1   37.47    4.93 
   9  -5   1   34.52    4.90 
  -9   5   1   33.10    4.65 
  -5  -9   1   37.16    2.83 
   9  -5   1   37.25    3.62 
  -9   5   1   43.29    4.20 
  -6  -9  -1    8.48    1.36 
   9  -6  -1    7.72    2.81 
  -6  -9  -1   10.42    2.64 
  -9   6  -1    6.91    2.02 
   9  -6  -1   11.54    1.91 
  -6  -9  -1    9.26    1.62 
   6   9  -1    8.39    2.85 
   9  -6  -1   10.71    2.26 
   6   9  -1   11.12    2.93 
  -9   6  -1    6.29    2.52 
  -9   6  -1    9.37    2.26 
   9  -6   1   12.36    1.69 
   9  -6   1   10.87    2.35 
  -9   6   1    3.39    2.38 
  -9   6   1    9.11    2.27 
  -9   6   1    7.86    1.94 
  -6  -9   1    8.39    1.24 
   6   9   1    9.68    3.00 
   6   9   1    7.12    2.80 
  -6  -9   1   10.94    2.68 
   9  -6   1    8.11    2.80 
  -9   7  -1    4.08    1.98 
   9  -7  -1    3.09    1.92 
   9  -7  -1    3.62    2.54 
  -9   7  -1    3.57    2.56 
   9  -7  -1    5.67    1.60 
  -7  -9  -1    4.51    1.39 
  -7  -9  -1    3.36    1.71 
   7   9  -1    5.69    2.83 
  -7  -9  -1    2.50    2.41 
   7   9   1    1.94    2.57 
   9  -7   1    5.95    1.60 
  -9   7   1    2.84    2.09 
  -7  -9   1    4.33    1.38 
  -7  -9   1    6.20    2.41 
   9  -7   1    8.14    2.72 
   7   9   1    4.33    2.76 
   9  -7   1    1.43    1.96 
  -9   7   1    8.78    3.06 
  -9   7   1    2.78    2.01 
   9  -8  -1    4.40    2.39 
  -9   8  -1    7.31    2.94 
   9  -8  -1    6.00    3.10 
  -8  -9  -1    5.27    2.03 
  -9   8  -1    2.44    2.10 
   8   9  -1    1.09    2.66 
  -8  -9  -1    4.61    2.78 
  -8  -9  -1    3.61    1.73 
  -8  -9   1    7.85    2.06 
   9  -8   1    7.31    2.80 
   9  -8   1    5.58    2.34 
  -9   8   1   10.36    2.49 
  -8  -9   1    6.65    2.91 
  -8  -9   1    7.30    1.68 
   9  -8   1    4.51    1.69 
  -9   8   1   10.31    3.08 
   8   9   1    9.31    3.01 
   9  -9  -1   -2.36    2.65 
  -9  -9  -1    1.89    1.99 
  -9   9  -1   -1.05    2.57 
  -9  -9  -1    1.22    2.78 
  -9  -9  -1    2.71    2.06 
  -9   9  -1    3.45    2.37 
   9   9  -1   -0.90    2.62 
   9  -9  -1    1.61    2.24 
   9   9   1    0.77    2.86 
  -9  -9   1    2.76    2.17 
  -9  -9   1    4.26    3.19 
  -9   9   1    1.99    2.29 
  -9  -9   1    5.59    2.72 
  -9  -9   1   -0.79    1.93 
  -9   9   1    3.83    3.06 
   9  -9   1    0.78    2.47 
   9  -9   1    1.64    2.60 
 -10  -9  -1    2.25    2.60 
   9 -10  -1   -0.04    2.55 
 -10  -9  -1    5.27    3.24 
  -9  10  -1    0.81    3.13 
  10   9  -1    7.46    3.25 
 -10  -9  -1    5.03    3.05 
  -9  10  -1    4.31    2.74 
   9 -10  -1    2.82    2.99 
  10   9   1    1.72    2.69 
 -10  -9   1    4.01    2.87 
  -9  10   1    4.96    2.71 
   9 -10   1    8.67    3.22 
  -9  10   1    6.22    3.01 
   9 -10   1    5.08    2.82 
 -10  -9   1    4.02    2.69 
   8 -10  -1    5.95    2.64 
   8 -10  -1    0.26    2.41 
 -10  -8  -1   -2.43    2.27 
  -8  10  -1    1.25    2.82 
 -10  -8  -1    0.05    2.45 
  -8  10  -1    1.48    2.38 
 -10  -8  -1    1.41    2.74 
  10   8  -1    3.17    2.84 
 -10  -8   1    3.62    2.44 
   8 -10   1    0.49    2.45 
 -10  -8   1    1.94    2.68 
  -8  10   1   -2.25    2.72 
   8 -10   1    3.61    2.62 
  -8  10   1   -1.78    2.31 
  -7  10  -1    4.04    3.03 
 -10  -7  -1    3.43    2.65 
 -10  -7  -1    1.81    2.53 
  -7  10  -1    4.05    2.34 
   7 -10  -1    1.21    2.25 
   7 -10  -1    2.59    2.52 
   7 -10   1    6.11    2.50 
  -7  10   1    7.19    2.76 
 -10  -7   1    6.26    2.36 
   7 -10   1    5.68    2.88 
 -10  -7   1    6.68    2.93 
  -7  10   1    6.97    3.05 
  -6  10  -1   42.85    3.78 
   6 -10  -1   43.12    4.46 
 -10  -6  -1   34.36    4.70 
  -6  10  -1   46.97    4.77 
  10   6  -1   31.20    4.80 
 -10  -6  -1   45.27    4.69 
 -10  -6  -1   36.22    5.06 
   6 -10  -1   36.68    5.06 
  -6  10  -1   39.76    4.86 
  -6  10   1   35.43    4.72 
 -10  -6   1   40.34    4.06 
   6 -10   1   40.10    4.34 
  -6  10   1   35.48    5.15 
 -10  -6   1   36.68    4.47 
   6 -10   1   34.25    4.83 
  -6  10   1   30.77    3.65 
 -10  -6   1   29.70    4.60 
   5 -10  -1   46.90    5.40 
 -10  -5  -1   50.88    5.01 
 -10  -5  -1   49.38    4.40 
  10   5  -1   51.37    5.32 
  -5  10  -1   48.05    5.50 
 -10  -5  -1   49.69    5.16 
   5 -10  -1   43.62    4.41 
  -5  10  -1   53.19    4.06 
 -10  -5  -1   50.31    4.84 
  -5  10  -1   46.76    5.10 
  -5  10   1   45.74    5.10 
 -10  -5   1   46.54    4.24 
 -10  -5   1   49.47    5.17 
   5 -10   1   54.96    5.77 
 -10  -5   1   45.03    5.44 
 -10  -5   1   48.30    4.56 
   5 -10   1   47.66    4.47 
  -5  10   1   44.43    5.32 
  10   5   1   46.21    5.26 
   4 -10  -1   55.39    5.66 
   4 -10  -1   52.57    4.54 
 -10  -4  -1   52.41    5.48 
 -10  -4  -1   53.60    5.03 
  -4  10  -1   49.16    5.42 
 -10  -4  -1   47.79    5.10 
  10   4  -1   54.35    5.54 
 -10  -4  -1   54.09    4.60 
  -4  10  -1   47.63    5.29 
  -4  10  -1   57.72    4.11 
   4 -10   1   73.11    5.93 
 -10  -4   1   56.66    4.66 
   4 -10   1   63.39    4.65 
 -10  -4   1   71.36    5.49 
  -4  10   1   65.02    4.25 
 -10  -4   1   56.53    4.84 
  -4  10   1   52.09    5.40 
  10   4   1   57.01    5.69 
  -4  10   1   61.73    5.76 
 -10  -4   1   62.65    5.53 
   3 -10  -1   72.22    4.89 
  -3  10  -1   81.04    6.72 
   3 -10  -1   83.53    6.66 
  -3  10  -1   78.83    4.88 
 -10  -3  -1   76.12    6.04 
 -10  -3  -1   75.55    6.31 
  -3  10  -1   72.64    6.18 
  10   3  -1   83.32    6.55 
 -10  -3   1   64.56    6.18 
  -3  10   1   76.78    6.24 
   3 -10   1   71.19    6.49 
 -10  -3   1   72.38    5.18 
 -10  -3   1   68.72    5.47 
  -3  10   1   71.77    4.89 
 -10  -3   1   72.09    5.98 
  -3  10   1   75.39    6.56 
  10   3   1   76.74    6.63 
   3 -10   1   72.10    4.87 
 -10  -2  -1   36.26    3.12 
  -2  10  -1   29.88    4.13 
  -2  10  -1   24.10    3.91 
 -10  -2  -1   27.10    3.97 
  -2  10  -1   30.19    2.23 
 -10  -2  -1   31.89    3.59 
  10   2  -1   28.13    4.24 
   2 -10  -1   32.32    2.40 
 -10  -2  -1   28.55    3.66 
   2 -10  -1   23.28    4.00 
 -10  -2   1   35.69    2.90 
   2 -10   1   27.75    4.38 
  10   2   1   34.46    4.32 
  -2  10   1   32.43    4.08 
 -10  -2   1   33.98    3.91 
  10   2   1   30.29    3.35 
  -2  10   1   31.54    2.39 
 -10  -2   1   34.23    4.21 
  -2  10   1   31.10    4.27 
 -10  -2   1   35.67    3.75 
  -1  10  -1   56.92    5.55 
   1 -10  -1   53.87    3.50 
 -10  -1  -1   50.57    4.73 
   1 -10  -1   53.82    5.68 
 -10  -1  -1   55.07    4.32 
  -1  10  -1   50.47    5.40 
 -10  -1  -1   46.01    5.24 
 -10  -1  -1   57.06    4.76 
  10   1  -1   47.74    5.62 
  10   1  -1   56.61    4.34 
 -10  -1   1   65.26    5.55 
   1 -10   1   58.81    5.74 
  -1  10   1   64.43    3.55 
  -1  10   1   65.79    5.73 
  -1  10   1   67.47    5.66 
  10   1   1   67.39    5.85 
 -10  -1   1   64.35    4.26 
  10   1   1   64.57    4.61 
 -10  -1   1   63.28    4.99 
 -10  -1   1   54.68    4.82 
   0  10  -1  116.64    8.71 
 -10   0  -1  116.09    8.43 
   0  10  -1  109.32    8.45 
  10   0  -1  127.28    8.93 
 -10   0  -1  121.13    7.60 
   0 -10  -1  125.88    8.99 
 -10   0  -1  115.97    7.83 
   0 -10   1  115.46    8.64 
 -10   0   1  114.37    7.96 
  10   0   1  112.45    8.78 
 -10   0   1  125.07    7.47 
  10   0   1  118.29    7.69 
   0  10   1  115.06    8.70 
 -10   0   1  124.84    8.58 
   0  10   1  116.18    8.43 
   1  10  -1   60.16    5.67 
 -10   1  -1   66.51    4.67 
  10  -1  -1   61.98    6.01 
 -10   1  -1   60.62    5.45 
  10  -1  -1   74.22    4.69 
 -10   1  -1   69.38    4.91 
   1  10  -1   66.68    5.83 
  -1 -10  -1   69.49    6.18 
  10  -1   1   57.93    4.52 
   1  10   1   57.18    5.68 
  -1 -10   1   50.52    5.62 
 -10   1   1   59.22    4.95 
   1  10   1   58.20    5.37 
  10  -1   1   59.27    4.63 
 -10   1   1   58.91    4.37 
 -10   1   1   52.45    5.25 
  10  -1   1   56.13    5.77 
 -10   2  -1   32.90    4.25 
 -10   2  -1   29.59    3.11 
 -10   2  -1   35.39    3.54 
   2  10  -1   31.55    4.11 
  10  -2  -1   35.21    3.10 
  -2 -10  -1   29.77    4.64 
   2  10  -1   31.05    4.37 
  10  -2  -1   29.57    4.63 
  10  -2  -1   32.02    3.06 
 -10   2   1   27.32    2.97 
  10  -2   1   23.73    4.33 
   2  10   1   31.92    4.13 
 -10   2   1   26.85    4.03 
   2  10   1   31.09    4.42 
 -10   2   1   35.85    3.77 
  10  -2   1   35.70    3.30 
  -2 -10   1   29.36    4.74 
  -3 -10  -1   74.73    6.73 
 -10   3  -1   73.66    6.47 
 -10   3  -1   66.15    5.56 
  10  -3  -1   75.97    5.37 
  10  -3  -1   78.24    6.88 
  10  -3  -1   73.35    5.41 
   3  10  -1   68.25    6.35 
   3  10  -1   70.47    6.45 
 -10   3  -1   73.00    5.66 
 -10   3   1   80.68    5.50 
   3  10   1   78.86    6.85 
   3  10   1   79.30    6.66 
 -10   3   1   75.92    5.83 
  10  -3   1   91.48    7.08 
  -3 -10   1   80.88    6.95 
 -10   3   1   86.12    6.62 
  10  -3   1   86.34    5.68 
   4  10  -1   62.94    5.91 
  10  -4  -1   72.11    6.41 
 -10   4  -1   61.60    5.01 
   4  10  -1   65.19    6.05 
  -4 -10  -1   59.87    6.06 
  10  -4  -1   70.57    4.78 
 -10   4  -1   60.52    5.76 
  10  -4  -1   70.85    4.63 
 -10   4  -1   66.34    4.98 
 -10   4   1   51.61    5.47 
  10  -4   1   58.56    6.14 
   4  10   1   50.68    5.88 
 -10   4   1   47.64    4.91 
  10  -4   1   53.62    4.33 
   4  10   1   56.90    5.89 
 -10   4   1   58.65    4.78 
  -4 -10   1   56.42    6.04 
  10  -4   1   51.99    4.72 
   5  10  -1   51.79    5.86 
  -5 -10  -1   48.78    5.71 
  10  -5  -1   46.06    5.57 
   5  10  -1   46.77    5.73 
 -10   5  -1   52.96    5.53 
  10  -5  -1   47.22    4.30 
 -10   5  -1   49.17    4.40 
 -10   5  -1   47.51    4.66 
  10  -5  -1   42.80    3.98 
   5  10   1   45.10    5.49 
  10  -5   1   48.44    3.91 
   5  10   1   43.78    5.65 
 -10   5   1   51.31    4.59 
  10  -5   1   54.78    5.71 
 -10   5   1   48.96    4.63 
  10  -5   1   49.88    4.40 
  -5 -10   1   48.19    5.55 
 -10   5   1   54.21    5.56 
 -10   6  -1   38.92    4.46 
 -10   6  -1   29.42    3.91 
   6  10  -1   37.33    5.48 
  10  -6  -1   32.45    5.44 
  -6 -10  -1   39.69    2.88 
 -10   6  -1   32.15    4.59 
  -6 -10  -1   35.40    2.84 
  10  -6  -1   41.17    4.16 
  -6 -10  -1   36.80    5.25 
   6  10  -1   37.69    5.32 
  10  -6  -1   32.49    3.50 
  10  -6   1   46.61    5.44 
 -10   6   1   43.84    5.17 
  -6 -10   1   50.79    5.52 
   6  10   1   34.16    5.28 
  10  -6   1   38.86    4.22 
   6  10   1   33.63    5.05 
  -6 -10   1   39.97    2.71 
 -10   6   1   34.43    4.05 
  -6 -10   1   39.83    2.66 
  10  -6   1   37.38    3.42 
 -10   6   1   39.66    4.21 
  10  -7  -1    4.38    3.06 
   7  10  -1    7.15    3.37 
 -10   7  -1    6.07    2.94 
  -7 -10  -1    8.62    2.95 
  10  -7  -1    4.09    2.17 
  -7 -10  -1    7.16    1.57 
 -10   7  -1    9.07    2.39 
  -7 -10  -1    7.57    1.51 
   7  10   1    2.14    2.91 
 -10   7   1    3.27    2.19 
  -7 -10   1    3.41    1.18 
  -7 -10   1    4.33    2.86 
   7  10   1    4.44    2.68 
 -10   7   1    5.15    3.06 
  -7 -10   1    6.84    1.41 
  10  -7   1    1.24    2.64 
  10  -7   1    3.79    2.08 
 -10   8  -1   -0.29    2.68 
  -8 -10  -1    0.03    2.91 
  -8 -10  -1   -0.56    1.65 
  10  -8  -1    1.45    2.23 
  10  -8  -1    1.07    3.04 
  -8 -10  -1    0.68    1.90 
   8  10  -1   -0.46    3.02 
 -10   8  -1    0.14    2.12 
  -8 -10   1   -1.82    1.66 
  -8 -10   1    2.20    2.85 
  -8 -10   1    0.99    1.77 
 -10   8   1   -1.89    2.29 
 -10   8   1    4.04    3.26 
   8  10   1   -0.52    2.97 
  10  -8   1    0.04    2.41 
  10  -8   1    0.63    2.81 
  10  -9  -1    4.10    2.81 
  -9 -10  -1    5.45    3.32 
  -9 -10  -1    7.86    2.44 
 -10   9  -1    0.89    3.22 
   9  10  -1   11.45    3.61 
  10  -9  -1    1.46    2.99 
 -10   9  -1    4.15    2.64 
  -9 -10   1    3.31    3.00 
  -9 -10   1    4.32    3.42 
 -10   9   1   -2.55    2.59 
  10  -9   1    6.18    3.04 
  -9 -10   1    2.86    2.31 
 -10   9   1    0.75    3.14 
   9  10   1   11.98    3.47 
  10  -9   1    3.93    2.80 
  10  10  -1    1.68    3.45 
  10 -10  -1    3.19    3.40 
 -10  10  -1    4.65    3.61 
 -10 -10  -1   -1.85    2.66 
 -10 -10  -1    0.78    3.59 
 -10  10  -1   -0.29    2.81 
  10 -10  -1   -1.62    2.66 
 -10 -10  -1    1.69    3.38 
  10  10   1   -3.17    3.45 
  10 -10   1    0.34    3.26 
 -10  10   1    0.94    3.28 
 -10 -10   1    0.15    3.12 
 -10 -10   1    2.93    2.65 
 -10 -10   1    4.89    3.93 
  10 -10   1    1.11    3.14 
 -10  10   1    3.80    3.08 
  10 -11  -1    1.78    3.48 
 -10  11  -1    5.84    4.04 
 -10  11  -1    2.57    3.64 
 -11 -10  -1   10.68    3.80 
  10 -11  -1   11.65    3.98 
 -11 -10  -1    5.64    3.51 
 -11 -10  -1    4.54    4.07 
  11  10  -1    2.09    3.59 
 -11 -10   1   16.93    4.49 
  10 -11   1    7.51    4.08 
 -10  11   1    7.12    3.48 
 -11 -10   1    9.66    3.39 
 -11 -10   1    8.96    3.95 
  10 -11   1    8.70    4.34 
 -10  11   1    9.88    4.53 
 -11  -9  -1   16.02    4.29 
 -11  -9  -1   11.16    3.56 
   9 -11  -1   17.11    3.94 
   9 -11  -1   13.03    3.81 
  -9  11  -1   20.48    4.74 
  -9  11  -1   16.70    3.82 
 -11  -9  -1   18.32    4.06 
 -11  -9   1   16.66    3.84 
   9 -11   1   15.38    3.74 
  -9  11   1   14.76    4.18 
  -9  11   1    9.37    3.72 
   9 -11   1   10.94    3.90 
 -11  -9   1   12.52    4.26 
 -11  -9   1    9.23    3.60 
  -8  11  -1    7.69    3.90 
 -11  -8  -1    9.65    3.28 
  -8  11  -1    9.90    3.20 
 -11  -8  -1    6.39    3.45 
   8 -11  -1    8.83    3.14 
   8 -11  -1    6.09    3.17 
 -11  -8  -1    2.89    2.96 
 -11  -8   1    7.32    2.82 
  -8  11   1    4.90    2.97 
  -8  11   1    7.66    3.66 
   8 -11   1    4.43    3.02 
 -11  -8   1    9.19    3.91 
   8 -11   1    4.53    2.89 
  -7  11  -1    6.13    2.90 
   7 -11  -1    5.28    2.49 
 -11  -7  -1    4.55    3.00 
 -11  -7  -1    4.65    3.25 
 -11  -7  -1    3.12    2.74 
   7 -11  -1    6.64    3.02 
 -11  -7   1    3.74    2.62 
   7 -11   1    7.48    2.91 
 -11  -7   1    3.18    2.66 
   7 -11   1    5.61    2.81 
 -11  -7   1    1.49    3.20 
  -7  11   1    6.18    2.99 
  -6  11  -1   20.26    3.51 
 -11  -6  -1   17.24    3.35 
   6 -11  -1   22.00    4.09 
 -11  -6  -1   16.16    3.31 
  11   6  -1   16.36    3.64 
 -11  -6  -1   17.46    3.25 
  -6  11  -1   19.73    3.12 
   6 -11  -1   19.52    3.10 
  -6  11  -1   17.52    4.01 
  -6  11   1   13.62    2.35 
 -11  -6   1   20.68    3.90 
   6 -11   1   20.77    3.16 
 -11  -6   1   20.71    3.81 
 -11  -6   1   18.18    2.80 
  -6  11   1   20.13    4.21 
   6 -11   1   25.72    3.99 
 -11  -6   1   21.48    3.49 
  -6  11   1   27.23    4.00 
  -5  11  -1   35.48    4.86 
  11   5  -1   28.48    4.31 
 -11  -5  -1   26.58    3.83 
 -11  -5  -1   34.64    3.78 
   5 -11  -1   29.97    3.85 
   5 -11  -1   27.86    4.31 
 -11  -5  -1   28.84    4.28 
  -5  11  -1   30.64    4.48 
  -5  11  -1   28.42    3.21 
 -11  -5  -1   27.65    4.26 
 -11  -5   1   31.43    4.98 
 -11  -5   1   24.75    3.50 
 -11  -5   1   30.28    4.11 
  -5  11   1   20.27    3.00 
   5 -11   1   25.75    3.72 
  -5  11   1   25.03    4.09 
   5 -11   1   29.19    4.53 
  -5  11   1   27.18    4.37 
  11   5   1   28.19    4.70 
 -11  -5   1   33.53    4.68 
   4 -11  -1   34.90    3.58 
  -4  11  -1   39.87    5.16 
 -11  -4  -1   43.18    3.85 
  -4  11  -1   33.53    3.02 
  -4  11  -1   33.28    4.80 
  11   4  -1   35.55    5.22 
 -11  -4  -1   33.77    4.21 
 -11  -4  -1   35.88    4.84 
 -11  -4  -1   36.86    4.75 
   4 -11  -1   36.21    5.16 
  11   4   1   33.31    4.75 
 -11  -4   1   34.11    3.97 
 -11  -4   1   31.14    4.99 
 -11  -4   1   31.73    4.32 
  -4  11   1   38.64    5.24 
 -11  -4   1   31.25    3.51 
   4 -11   1   28.69    3.44 
  -4  11   1   30.01    2.97 
  -4  11   1   35.07    4.73 
   4 -11   1   32.02    4.98 
  -3  11  -1   38.44    5.23 
   3 -11  -1   39.31    5.24 
   3 -11  -1   39.70    3.02 
  -3  11  -1   40.46    5.13 
 -11  -3  -1   40.48    4.21 
  -3  11  -1   39.58    2.81 
 -11  -3  -1   43.09    4.83 
  11   3  -1   42.01    5.26 
 -11  -3  -1   42.98    3.72 
 -11  -3  -1   34.30    4.43 
 -11  -3   1   31.11    4.37 
 -11  -3   1   35.17    4.59 
 -11  -3   1   33.23    3.92 
  -3  11   1   30.23    5.01 
  11   3   1   36.87    5.39 
  -3  11   1   29.84    2.86 
 -11  -3   1   29.31    3.43 
   3 -11   1   32.74    5.06 
  -3  11   1   36.83    5.16 
  -2  11  -1   35.31    2.33 
 -11  -2  -1   37.62    4.06 
 -11  -2  -1   41.25    4.81 
  11   2  -1   35.49    4.88 
   2 -11  -1   41.96    5.34 
   2 -11  -1   34.58    2.60 
  -2  11  -1   33.94    2.39 
  -2  11  -1   38.30    5.06 
  -2  11  -1   34.42    4.86 
 -11  -2   1   33.94    4.21 
 -11  -2   1   42.18    3.34 
   2 -11   1   30.99    5.05 
  -2  11   1   36.83    4.95 
 -11  -2   1   36.40    4.65 
  -2  11   1   35.76    2.59 
  11   2   1   48.19    5.48 
  -2  11   1   35.64    4.89 
 -11  -1  -1   50.61    4.90 
  -1  11  -1   48.70    5.19 
  -1  11  -1   49.93    5.19 
 -11  -1   1   36.55    3.34 
  11   1   1   32.26    3.73 
  -1  11   1   41.61    5.26 
   1 -11   1   31.89    5.14 
 -11  -1   1   31.72    4.72 
 -11  -1   1   32.72    4.27 
  -1  11   1   36.42    4.98 
  11   1   1   38.06    5.01 
   0  11  -1   64.33    6.23 
 -11   0  -1   65.88    6.18 
 -11   0  -1   70.83    5.10 
   0  11  -1   67.04    6.16 
 -11   0  -1   66.11    5.57 
   0 -11  -1   69.14    6.80 
  11   0  -1   61.60    6.64 
 -11   0  -1   68.73    5.43 
  11   0  -1   72.96    5.00 
   0  11   1   69.61    6.41 
 -11   0   1   71.39    6.37 
  11   0   1   72.98    5.27 
   0 -11   1   73.10    6.79 
  11   0   1   59.84    6.47 
 -11   0   1   64.69    5.57 
 -11   0   1   68.78    4.87 
   0  11   1   76.54    6.70 
  11  -1  -1   39.07    3.45 
  11  -1  -1   35.52    3.60 
   1  11  -1   44.55    5.08 
 -11   1  -1   35.89    3.91 
 -11   1  -1   32.47    4.72 
   1  11  -1   31.71    4.70 
  11  -1  -1   33.11    5.36 
  -1 -11  -1   33.54    5.35 
 -11   1  -1   36.48    3.64 
   1  11   1   50.22    5.21 
 -11   2  -1   36.66    4.46 
  -2 -11  -1   37.97    5.36 
 -11   2  -1   42.51    4.05 
   2  11  -1   42.50    5.25 
  11  -2  -1   36.59    3.57 
 -11   2  -1   38.27    5.51 
   2  11  -1   43.26    5.22 
  11  -2  -1   40.19    5.58 
  11  -2  -1   40.15    3.57 
  11  -2   1   41.51    5.40 
 -11   2   1   32.03    4.87 
  11  -2   1   36.88    3.77 
 -11   2   1   34.46    4.15 
   2  11   1   30.78    4.86 
  -2 -11   1   41.99    5.65 
 -11   2   1   35.30    3.55 
  11  -2   1   41.74    3.55 
   2  11   1   39.37    4.74 
 -11   3  -1   35.76    3.96 
  11  -3  -1   35.63    3.62 
   3  11  -1   28.85    5.08 
   3  11  -1   37.75    5.28 
  11  -3  -1   35.11    5.06 
 -11   3  -1   37.02    4.80 
  -3 -11  -1   32.82    4.92 
 -11   3  -1   37.26    3.90 
  11  -3  -1   32.26    3.61 
 -11   3   1   44.41    5.23 
  11  -3   1   37.77    3.97 
  11  -3   1   43.42    5.16 
  -3 -11   1   44.60    5.87 
 -11   3   1   44.55    4.30 
   3  11   1   35.67    5.34 
 -11   3   1   47.11    3.90 
   3  11   1   39.03    5.27 
  11  -3   1   36.20    3.45 
  11  -4  -1   28.55    4.47 
   4  11  -1   37.18    5.19 
 -11   4  -1   34.09    4.79 
   4  11  -1   34.01    5.22 
  -4 -11  -1   36.50    5.04 
  11  -4  -1   28.45    3.39 
 -11   4  -1   30.09    4.02 
  11  -4  -1   31.90    3.73 
 -11   4  -1   32.07    3.85 
 -11   4   1   36.33    4.94 
   4  11   1   31.05    4.90 
   4  11   1   36.72    5.26 
  -4 -11   1   40.84    5.42 
  11  -4   1   33.33    5.15 
 -11   4   1   34.05    4.03 
  11  -4   1   34.00    3.30 
  11  -4   1   37.79    4.03 
 -11   5  -1   35.15    4.24 
   5  11  -1   30.10    4.73 
  -5 -11  -1   39.17    5.57 
  11  -5  -1   26.38    4.56 
 -11   5  -1   29.86    5.06 
  11  -5  -1   26.19    3.64 
  11  -5  -1   29.20    3.63 
   5  11  -1   25.30    4.48 
 -11   5  -1   22.86    3.22 
  11  -5   1   24.39    3.11 
 -11   5   1   32.56    4.19 
   5  11   1   30.65    4.75 
  -5 -11   1   25.00    4.44 
  11  -5   1   36.35    5.17 
  11  -5   1   29.25    3.98 
 -11   5   1   29.05    4.83 
 -11   5   1   26.89    3.93 
   5  11   1   32.41    5.18 
  -6 -11  -1   19.69    4.10 
  11  -6  -1   20.15    4.65 
   6  11  -1   16.89    4.13 
  11  -6  -1   23.18    2.96 
   6  11  -1   23.84    4.15 
 -11   6  -1   24.26    4.35 
 -11   6  -1   22.97    3.52 
 -11   6   1   16.34    3.69 
 -11   6   1   12.51    2.82 
   6  11   1   15.54    3.49 
  11  -6   1   22.99    3.04 
 -11   6   1   13.74    2.97 
  -6 -11   1   16.36    4.04 
  11  -6   1   20.23    2.98 
   6  11   1   19.95    4.00 
  11  -6   1   16.46    3.86 
   7  11  -1    6.93    3.57 
  11  -7  -1    4.60    3.37 
  11  -7  -1    3.18    2.21 
 -11   7  -1    5.32    2.48 
  -7 -11  -1    9.10    3.51 
 -11   7  -1    7.90    3.80 
  -7 -11  -1    4.15    1.20 
   7  11   1    7.83    3.43 
  -7 -11   1    5.08    3.33 
  11  -7   1    5.21    2.48 
 -11   7   1    5.59    2.52 
  11  -7   1    3.79    3.25 
   7  11   1    6.51    4.31 
 -11   8  -1    4.96    2.59 
 -11   8  -1    4.74    3.35 
  11  -8  -1    6.24    2.50 
  -8 -11  -1    4.00    3.42 
   8  11  -1    7.04    4.11 
  11  -8  -1    5.14    3.31 
 -11   8   1    9.85    2.98 
  11  -8   1    9.98    3.72 
  -8 -11   1   10.31    3.71 
  -8 -11   1    6.32    1.48 
  11  -8   1    9.28    2.87 
   8  11   1   10.47    3.63 
 -11   8   1    8.60    3.87 
  11  -9  -1   11.08    4.16 
  11  -9  -1   12.42    3.28 
  -9 -11  -1    6.88    3.87 
 -11   9  -1   15.73    4.06 
   9  11  -1   11.03    4.45 
 -11   9  -1   10.38    3.17 
  -9 -11  -1   15.21    2.93 
 -11   9   1   13.95    3.53 
  -9 -11   1   20.82    4.22 
  -9 -11   1   16.35    4.73 
  11  -9   1   14.91    3.53 
  11  -9   1   15.38    4.29 
 -11   9   1   13.60    4.18 
  -9 -11   1   19.90    3.02 
   9  11   1   18.11    4.37 
 -11  10  -1    4.47    4.10 
 -10 -11  -1    7.39    3.64 
 -10 -11  -1    8.29    4.32 
  10  11  -1   12.18    4.14 
 -10 -11  -1    2.05    3.85 
  11 -10  -1    7.04    3.30 
 -11  10  -1    9.93    3.46 
  11 -10  -1    8.68    4.47 
  10  11   1    1.33    3.58 
 -11  10   1    6.69    3.44 
 -11  10   1    5.83    4.07 
 -10 -11   1    6.36    6.44 
  11 -10   1    4.64    3.34 
  11 -10   1    3.77    6.18 
 -10 -11   1    9.78    4.24 
 -11 -11  -1   16.46    4.81 
 -11 -11  -1   18.16    5.22 
  11  11  -1   16.37    4.87 
 -11  11  -1   17.45    4.85 
 -11  11  -1   11.63    4.13 
  11 -11  -1   18.18    5.10 
  11 -11  -1   14.31    6.17 
  11  11   1   19.64    4.76 
  11 -11   1   12.47    4.70 
  11 -11   1   21.05    4.31 
 -11 -11   1   12.72    4.97 
 -11  11   1    9.62    5.06 
 -11  11   1   19.92    4.57 
 -11 -11   1   15.23    4.89 
 -10  12  -1   23.51    4.68 
 -12 -10  -1   28.33    5.10 
 -12 -10  -1   17.20    5.12 
 -12 -10  -1   21.44    4.52 
  10 -12  -1   26.47    5.44 
  10 -12  -1   18.73    4.63 
 -10  12  -1   20.59    5.48 
 -12 -10   1   16.80    4.42 
 -12 -10   1   23.69    5.24 
  10 -12   1    7.64    4.80 
 -10  12   1   15.22    4.99 
 -10  12   1   16.45    4.84 
 -12 -10   1   19.37    4.90 
  10 -12   1   11.32    4.43 
 -12  -9  -1   23.53    4.70 
   9 -12  -1   29.73    4.96 
 -12  -9  -1   28.38    5.14 
   9 -12  -1   28.51    4.77 
 -12  -9  -1   27.52    4.65 
 -12  -9  -1   20.06    4.88 
  -9  12  -1   25.81    4.89 
  -9  12  -1   31.52    5.42 
   9 -12   1   21.54    4.81 
 -12  -9   1   27.56    4.83 
  -9  12   1   31.35    5.68 
  -9  12   1   22.80    4.82 
   9 -12   1   26.24    4.72 
 -12  -9   1   25.26    4.65 
 -12  -9   1   29.47    5.20 
   8 -12  -1   27.88    4.47 
 -12  -8  -1   25.87    4.78 
 -12  -8  -1   27.40    4.94 
  -8  12  -1   25.51    4.39 
  -8  12  -1   23.23    5.05 
   8 -12  -1   29.55    6.93 
 -12  -8  -1   27.58    4.87 
 -12  -8  -1   29.71    5.37 
  -8  12   1   31.81    5.16 
 -12  -8   1   41.93    6.12 
 -12  -8   1   36.40    5.67 
 -12  -8   1   39.72    6.45 
   8 -12   1   33.72    4.78 
   8 -12   1   26.83    4.91 
  -8  12   1   43.08    6.23 
  -7  12  -1   16.80    3.86 
 -12  -7  -1   19.13    3.94 
   7 -12  -1   23.86    3.73 
 -12  -7  -1   21.52    4.49 
 -12  -7  -1   21.19    4.08 
   7 -12  -1   16.80    4.01 
  -7  12  -1   18.45    4.24 
   7 -12   1   15.22    4.60 
   7 -12   1    9.06    3.34 
  -7  12   1   15.94    3.84 
  -7  12   1    9.53    4.25 
 -12  -7   1    9.95    4.14 
 -12  -7   1    9.71    3.28 
 -12  -7   1   10.77    4.37 
  -6  12  -1   28.13    4.46 
 -12  -6  -1   21.72    4.41 
 -12  -6  -1   22.52    3.78 
   6 -12  -1   26.68    4.62 
  -6  12  -1   19.36    4.54 
   6 -12  -1   27.29    4.44 
  12   6  -1   19.00    4.14 
 -12  -6  -1   27.62    4.27 
 -12  -6   1   24.93    4.24 
 -12  -6   1   21.38    4.52 
   6 -12   1   22.05    3.50 
  -6  12   1   22.47    4.59 
   6 -12   1   26.53    4.62 
 -12  -6   1   23.40    3.62 
  -6  12   1   16.54    3.64 
 -12  -5  -1   25.59    3.74 
   5 -12  -1   25.19    4.30 
  12   5  -1   25.31    4.63 
 -12  -5  -1   29.02    4.24 
 -12  -5  -1   34.08    5.38 
  -5  12  -1   32.04    5.52 
  -5  12  -1   28.30    4.50 
   5 -12  -1   29.57    4.32 
  -5  12   1   30.07    4.94 
 -12  -5   1   39.81    4.56 
 -12  -5   1   26.97    4.17 
   5 -12   1   25.52    4.54 
  12   5   1   20.67    4.18 
  -5  12   1   25.17    4.16 
 -12  -5   1   23.57    4.36 
 -12  -5   1   20.10    3.05 
  -4  12  -1   34.93    5.35 
 -12  -4  -1   27.15    4.44 
 -12  -4  -1   29.36    4.81 
  -4  12  -1   34.04    5.62 
 -12  -4  -1   30.87    4.92 
  -4  12  -1   34.26    3.53 
   4 -12  -1   23.80    4.32 
   4 -12  -1   34.08    3.77 
 -12  -4  -1   28.21    4.11 
  12   4  -1   26.98    4.67 
   4 -12   1   43.03    5.55 
 -12  -4   1   31.20    5.11 
 -12  -4   1   41.54    4.09 
  12   4   1   39.02    5.60 
  -4  12   1   47.57    6.04 
  -4  12   1   37.71    5.61 
 -12  -4   1   37.72    5.12 
 -12  -4   1   31.19    4.26 
  -4  12   1   30.82    3.61 
  -3  12  -1   42.18    5.64 
  12   3  -1   56.81    5.97 
   3 -12  -1   49.15    5.78 
  -3  12  -1   46.13    5.84 
 -12  -3  -1   43.31    4.74 
 -12  -3  -1   38.21    4.13 
 -12  -3  -1   46.84    5.48 
 -12  -3  -1   41.57    4.90 
  -3  12  -1   41.88    2.84 
  -3  12  -1   41.28    2.91 
  12   3   1   34.88    5.58 
  -3  12   1   39.76    5.64 
  -3  12   1   35.69    3.08 
 -12  -3   1   32.94    5.42 
  -3  12   1   43.12    5.55 
 -12  -3   1   34.80    5.04 
   3 -12   1   42.60    5.88 
 -12  -3   1   35.64    4.38 
  -2  12  -1   40.67    5.46 
 -12  -2  -1   37.60    3.90 
 -12  -2  -1   31.32    5.04 
   2 -12  -1   36.68    5.78 
  -2  12  -1   33.23    5.66 
  12   2  -1   32.12    5.70 
 -12  -2  -1   33.84    4.45 
  12   2   1   44.67    5.97 
 -12  -2   1   35.45    4.07 
  -2  12   1   40.55    5.67 
  -2  12   1   38.29    5.41 
 -12  -2   1   43.61    5.46 
   2 -12   1   35.02    5.41 
 -12  -2   1   39.05    3.67 
 -12  -2   1   37.30    4.63 
  -1  12  -1   65.52    7.04 
 -12  -1  -1   78.27    6.27 
  -1  12  -1   88.92    7.57 
  12   1  -1   91.89    7.74 
 -12  -1  -1   79.10    7.04 
 -12  -1  -1   80.41    5.91 
   1 -12  -1   73.23    7.25 
  12   1   1   75.08    5.93 
  -1  12   1   77.56    7.21 
  12   1   1   97.61    7.93 
   1 -12   1   70.96    7.08 
 -12  -1   1   78.20    7.11 
 -12  -1   1   81.14    5.61 
 -12  -1   1   74.87    6.36 
  -1  12   1   71.78    7.41 
   0 -12  -1   43.45    6.11 
   0  12  -1   47.30    5.94 
   0  12  -1   44.81    5.84 
 -12   0  -1   48.79    4.69 
  12   0  -1   48.95    6.11 
  12   0  -1   47.67    4.05 
 -12   0  -1   45.77    4.56 
 -12   0  -1   39.16    5.25 
  12   0   1   50.75    6.19 
   0  12   1   45.64    5.73 
 -12   0   1   49.08    4.07 
   0 -12   1   35.95    6.03 
 -12   0   1   49.26    4.90 
   0  12   1   40.10    5.76 
  12   0   1   48.44    4.39 
 -12   0   1   50.78    5.77 
   1  12  -1   82.00    7.55 
 -12   1  -1   84.75    7.31 
   1  12  -1   72.65    7.20 
  12  -1  -1   80.86    5.75 
  -1 -12  -1   83.91    7.91 
 -12   1  -1   73.19    6.29 
 -12   1  -1   81.65    6.05 
  12  -1  -1   89.87    7.88 
 -12   1   1   78.81    7.23 
   1  12   1   89.33    7.61 
   1  12   1   83.11    7.31 
  12  -1   1   87.09    6.08 
 -12   1   1   84.92    6.56 
  -1 -12   1   81.46    7.77 
  12  -1   1   73.25    7.24 
 -12   1   1   76.63    5.73 
   2  12  -1   42.16    5.57 
  -2 -12  -1   38.49    5.46 
 -12   2  -1   36.88    4.32 
  12  -2  -1   29.17    5.15 
  12  -2  -1   40.93    3.85 
 -12   2  -1   36.71    5.09 
   2  12  -1   38.20    5.59 
 -12   2  -1   39.42    4.17 
 -12   2   1   38.55    5.42 
 -12   2   1   37.62    3.89 
  12  -2   1   39.55    5.54 
   2  12   1   32.35    4.98 
  12  -2   1   42.64    4.15 
  -2 -12   1   38.02    5.97 
 -12   2   1   40.81    4.50 
   2  12   1   41.32    5.59 
  12  -3  -1   35.01    5.98 
  12  -3  -1   37.48    4.09 
 -12   3  -1   48.10    5.73 
   3  12  -1   34.08    5.92 
 -12   3  -1   45.15    4.51 
 -12   3  -1   41.63    4.50 
   3  12  -1   29.84    5.07 
  -3 -12  -1   41.37    6.12 
   3  12   1   35.12    5.81 
  12  -3   1   50.38    3.96 
   3  12   1   48.27    6.25 
  -3 -12   1   51.61    6.47 
 -12   3   1   49.61    4.65 
 -12   3   1   42.88    4.80 
  12  -3   1   45.33    4.41 
 -12   3   1   40.75    5.80 
  12  -3   1   39.14    6.10 
   4  12  -1   39.41    5.82 
  12  -4  -1   32.08    5.16 
 -12   4  -1   41.00    4.54 
  12  -4  -1   43.48    4.13 
 -12   4  -1   39.18    4.77 
   4  12  -1   36.05    5.84 
  -4 -12  -1   38.70    6.04 
 -12   4  -1   39.29    5.78 
  12  -4   1   29.15    5.05 
  12  -4   1   30.77    4.15 
 -12   4   1   38.42    5.65 
  -4 -12   1   32.90    5.15 
   4  12   1   32.98    5.70 
   4  12   1   35.69    5.52 
 -12   4   1   34.10    4.67 
  12  -4   1   37.51    3.74 
 -12   4   1   28.62    4.18 
  12  -5  -1   28.79    3.94 
  -5 -12  -1   25.53    4.72 
   5  12  -1   25.73    4.70 
 -12   5  -1   25.13    3.50 
  12  -5  -1   25.69    4.68 
 -12   5  -1   26.07    4.64 
  -5 -12   1   34.06    5.06 
  12  -5   1   27.23    4.87 
 -12   5   1   33.63    4.54 
  12  -5   1   21.76    3.26 
 -12   5   1   29.34    4.45 
 -12   5   1   26.31    4.46 
  12  -5   1   30.16    4.17 
   5  12   1   24.61    4.44 
   6  12  -1   22.95    4.65 
  12  -6  -1   21.32    3.15 
 -12   6  -1   15.98    4.24 
  -6 -12  -1   24.73    4.59 
 -12   6  -1   23.59    3.34 
   6  12  -1   17.22    4.31 
 -12   6   1   24.70    4.57 
  -6 -12   1   25.59    4.53 
   6  12   1   23.36    4.52 
  12  -6   1   14.46    6.11 
   6  12   1   23.07    5.06 
 -12   6   1   23.33    3.56 
  12  -6   1   21.54    3.37 
   7  12  -1   10.67    3.81 
 -12   7  -1   12.83    3.17 
   7  12  -1   13.87    4.33 
  12  -7  -1   10.33    4.15 
  12  -7  -1   13.79    2.98 
 -12   7  -1   18.56    4.69 
  -7 -12   1   21.76    5.93 
 -12   7   1   18.21    4.46 
 -12   7   1   22.47    3.63 
  12  -7   1   22.06    3.49 
  12  -7   1   16.93    4.63 
   7  12   1   23.94    4.96 
  -8 -12  -1   37.44    5.70 
 -12   8  -1   44.43    7.14 
   8  12  -1   37.62    5.99 
 -12   8  -1   39.50    5.37 
  12  -8  -1   35.90    5.92 
  12  -8  -1   40.30    5.11 
 -12   8   1   31.39    4.60 
  12  -8   1   27.77    4.20 
   8  12   1   26.41    5.12 
 -12   8   1   25.21    5.54 
  -8 -12   1   26.71    5.31 
  12  -8   1   42.37    7.23 
   9  12  -1   28.98    5.67 
  12  -9  -1   31.43    5.90 
 -12   9  -1   26.83    5.54 
 -12   9  -1   26.99    4.24 
  -9 -12  -1   30.15    5.40 
  12  -9  -1   28.00    4.29 
  12  -9   1   22.23    5.39 
 -12   9   1   34.23    5.89 
 -12   9   1   26.61    4.56 
  -9 -12   1   26.28    5.42 
  12  -9   1   18.44    4.16 
   9  12   1   29.07    5.73 
 -12  10  -1   20.79    4.48 
  10  12  -1   10.58    4.72 
  12 -10  -1   19.10    4.12 
  12 -10  -1   26.12    5.57 
 -10 -12  -1   15.97    5.64 
 -10 -12  -1   28.32    5.52 
 -10 -12   1   12.87    5.21 
 -12  10   1   21.01    5.50 
  12 -10   1   20.84    4.42 
  12 -10   1   20.45    5.37 
 -10 -12   1   28.55    5.79 
 -12  10   1   23.63    4.45 
  10  12   1   27.49    5.52 
 -13  -9  -1   25.86    5.00 
  -9  13  -1   16.57    6.04 
  -9  13  -1   18.55    5.28 
   9 -13  -1   15.98    4.68 
   9 -13  -1   18.68    4.93 
 -13  -9  -1   20.24    4.91 
 -13  -9  -1   19.45    4.95 
 -13  -9  -1   15.46    4.93 
 -13  -9   1   11.26    4.82 
  -9  13   1   18.16    5.53 
  -9  13   1   15.62    4.92 
 -13  -9   1   15.82    4.52 
 -13  -9   1   10.08    5.25 
   9 -13   1   16.31    4.51 
 -13  -9   1   18.14    5.34 
 -13  -8  -1   23.98    5.13 
 -13  -8  -1   17.87    4.68 
  -8  13  -1   26.33    5.70 
   8 -13  -1   20.20    4.84 
 -13  -8  -1   31.67    5.55 
  -8  13  -1   31.45    5.24 
   8 -13  -1   23.36    4.64 
 -13  -8  -1   27.29    4.98 
 -13  -8   1   44.40    7.28 
  -8  13   1   29.42    5.73 
 -13  -8   1   26.44    5.02 
  -8  13   1   18.58    7.17 
 -13  -8   1   27.06    4.69 
   8 -13   1   26.29    5.22 
 -13  -8   1   20.96    4.90 
 -13  -7  -1   30.91    4.92 
 -13  -7  -1   25.01    5.34 
  -7  13  -1   26.47    4.91 
   7 -13  -1   29.04    4.36 
  -7  13  -1   40.34    6.35 
 -13  -7  -1   33.96    5.03 
   7 -13  -1   27.90    5.20 
 -13  -7  -1   29.70    5.18 
  -7  13   1   26.68    5.54 
 -13  -7   1   33.49    5.88 
  -7  13   1   29.03    5.09 
 -13  -7   1   31.69    5.35 
   7 -13   1   28.54    5.08 
 -13  -7   1   28.41    4.41 
   6 -13  -1   25.34    4.85 
 -13  -6  -1   27.60    4.96 
 -13  -6  -1   29.11    4.35 
  -6  13  -1   30.21    4.89 
  -6  13  -1   36.07    5.99 
 -13  -6  -1   32.03    4.86 
   6 -13  -1   22.29    3.77 
  13   6  -1   21.12    4.63 
   6 -13   1   31.21    5.26 
  -6  13   1   35.32    5.78 
 -13  -6   1   28.90    4.94 
 -13  -6   1   27.33    4.26 
  -6  13   1   33.28    4.99 
  13   5  -1   34.10    5.50 
  -5  13  -1   41.29    6.61 
 -13  -5  -1   37.41    5.64 
   5 -13  -1   32.42    4.51 
  -5  13  -1   40.63    6.05 
   5 -13  -1   45.71    6.70 
 -13  -5  -1   33.19    4.95 
   5 -13   1   41.51    6.64 
 -13  -5   1   45.71    6.24 
  -5  13   1   49.78    6.95 
  -5  13   1   45.80    6.60 
 -13  -5   1   38.32    5.50 
 -13  -5   1   36.52    5.78 
 -13  -4  -1   62.03    6.42 
  -4  13  -1   62.18    7.28 
  -4  13  -1   59.30    3.96 
 -13  -4  -1   60.39    6.70 
   4 -13  -1   46.63    7.18 
 -13  -4  -1   60.81    6.04 
  -4  13  -1   59.83    7.21 
  13   4  -1   62.06    7.33 
 -13  -4   1   56.37    8.97 
 -13  -4   1   55.01    6.35 
  -4  13   1   49.08    6.96 
  -4  13   1   61.33    7.43 
  13   4   1   47.95    6.96 
   4 -13   1   57.07    6.96 
 -13  -4   1   58.80    5.79 
  13   3  -1   60.66    6.95 
 -13  -3  -1   32.69    5.70 
 -13  -3  -1   34.55    5.28 
 -13  -3  -1   39.39    5.20 
  -3  13  -1   35.37    5.67 
  -3  13  -1   51.77    6.51 
 -13  -3   1   41.46    5.48 
  -3  13   1   45.45    3.02 
  -3  13   1   59.03    6.89 
   3 -13   1   40.86    7.49 
 -13  -3   1   48.25    5.91 
  13   3   1   37.43    6.24 
 -13  -3   1   48.58    5.02 
  -2  13  -1   17.36    4.30 
  13   2  -1   23.71    4.87 
 -13  -2  -1   20.91    3.58 
 -13  -2  -1   21.93    3.87 
  -2  13   1   23.16    4.81 
 -13  -2   1   20.35    3.69 
 -13  -2   1   20.54    3.99 
  -2  13   1   25.13    4.77 
 -13  -2   1   25.02    4.05 
  13   2   1   18.78    4.67 
  13   1  -1   31.76    5.25 
 -13  -1  -1   21.99    3.71 
 -13  -1  -1   24.53    4.34 
  -1  13  -1   36.20    5.71 
  -1  13  -1   25.90    4.74 
   1 -13  -1   25.30    5.80 
 -13  -1   1   35.11    5.39 
  13   1   1   35.63    5.48 
  -1  13   1   27.48    4.75 
   1 -13   1   24.49    7.25 
  -1  13   1   28.80    4.60 
 -13  -1   1   29.78    4.63 
   0  13  -1   45.05    6.39 
 -13   0  -1   42.75    5.06 
 -13   0  -1   42.35    6.09 
 -13   0  -1   50.01    5.98 
   0  13  -1   47.36    6.47 
   0 -13  -1   44.07    6.67 
  13   0  -1   46.50    6.56 
  13   0   1   44.03    6.72 
 -13   0   1   42.47    5.17 
   0  13   1   45.40    6.20 
   0 -13   1   41.63    6.55 
  13   0   1   42.35    4.56 
   0  13   1   51.15    6.52 
 -13   0   1   50.02    6.06 
 -13   1  -1   31.73    4.66 
   1  13  -1   24.93    4.38 
  13  -1  -1   26.95    3.46 
  -1 -13  -1   27.71    9.05 
   1  13  -1   27.54    4.85 
  13  -1  -1   35.48    7.68 
 -13   1  -1   26.49    3.63 
   1  13   1   22.83    4.54 
 -13   1   1   27.06    3.84 
  13  -1   1   26.40    3.83 
 -13   1   1   34.25    5.28 
  -1 -13   1   17.17    6.49 
   1  13   1   27.62    5.13 
 -13   2  -1   24.36    3.58 
  13  -2  -1   23.62    3.51 
   2  13  -1   22.46    5.31 
 -13   2  -1   19.17    4.03 
  13  -2  -1   17.42    6.08 
   2  13  -1   27.47    4.96 
 -13   2   1   22.00    3.67 
 -13   2   1   18.76    4.00 
  13  -2   1   27.44    3.82 
   2  13   1   21.77    4.70 
  13  -2   1   23.31    7.85 
 -13   3  -1   45.73    7.20 
   3  13  -1   48.80    7.73 
 -13   3  -1   50.82    5.25 
  13  -3  -1   52.99    6.95 
  -3 -13  -1   45.45    7.19 
   3  13  -1   39.01    6.32 
  13  -3  -1   48.85    4.59 
   3  13   1   36.83    5.95 
  13  -3   1   34.79    5.66 
  13  -3   1   40.70    4.60 
   3  13   1   41.75    6.54 
  -3 -13   1   29.10    6.52 
 -13   3   1   50.12    5.33 
  13  -4  -1   53.84    7.54 
  -4 -13  -1   64.22    7.89 
  13  -4  -1   46.84    5.28 
   4  13  -1   62.89    9.01 
   4  13  -1   49.60    7.14 
 -13   4  -1   56.46    6.01 
 -13   4  -1   48.93    7.09 
   4  13   1   64.43    7.85 
  13  -4   1   72.34    5.77 
   4  13   1   69.77    8.15 
  -4 -13   1   66.92    7.73 
 -13   4   1   66.47    6.26 
 -13   4   1   68.68    7.42 
  13  -4   1   64.67    7.32 
  13  -5  -1   45.52    6.73 
 -13   5  -1   49.88    6.74 
   5  13  -1   38.14    6.08 
  -5 -13  -1   49.12    7.19 
   5  13  -1   46.03    6.42 
  13  -5  -1   39.70    4.73 
 -13   5  -1   44.55    5.48 
  -5 -13   1   37.59    6.02 
 -13   5   1   38.57    5.52 
   5  13   1   32.81    5.88 
   5  13   1   49.99    6.91 
  13  -5   1   36.14    4.98 
 -13   5   1   42.17    6.78 
  13  -5   1   49.73    7.58 
   6  13  -1   23.36    5.34 
  13  -6  -1   21.98    5.02 
 -13   6  -1   28.83    4.72 
   6  13  -1   22.69    4.61 
  -6 -13  -1   28.24    5.43 
  13  -6  -1   33.86    4.62 
 -13   6  -1   24.67    4.85 
  -6 -13   1   29.58    5.32 
  13  -6   1   30.22    5.81 
 -13   6   1   24.82    4.91 
   6  13   1   39.42    6.43 
   6  13   1   24.30    5.42 
  13  -6   1   24.44    3.83 
 -13   6   1   23.99    4.10 
 -13   7  -1   30.58    5.29 
 -13   7  -1   26.08    4.18 
   7  13  -1   27.63    5.57 
  13  -7  -1   31.88    5.75 
  -7 -13  -1   28.66    5.82 
  13  -7  -1   31.13    4.92 
  -7 -13   1   31.76    6.06 
  13  -7   1   25.29    5.86 
  13  -7   1   33.11    5.28 
 -13   7   1   32.97    4.64 
   7  13   1   33.18    5.97 
   7  13   1   35.05    5.65 
 -13   7   1   29.40    5.51 
  13  -8  -1   19.92    3.91 
 -13   8  -1   16.93    3.95 
   8  13  -1   20.30    5.43 
  13  -8  -1   25.59    5.56 
  -8 -13  -1   21.42    5.85 
 -13   8  -1   27.47    5.36 
  13  -8   1   19.80    5.89 
  13  -8   1   34.67    5.48 
 -13   8   1   28.48    4.51 
   8  13   1   25.58    5.34 
  -8 -13   1   28.41    5.90 
 -13   8   1   21.52    5.39 
  13  -9  -1   18.79    5.42 
  -9 -13  -1   10.86    5.36 
 -13   9  -1   16.92    4.19 
   9  13  -1   27.23    5.89 
  13  -9  -1   19.96    4.02 
 -13   9  -1   19.64    6.03 
   9  13   1   18.62    5.26 
  13  -9   1   17.27    5.55 
 -13   9   1   16.11    4.49 
  13  -9   1   22.06    4.21 
 -13   9   1   24.10    5.80 
  -9 -13   1   12.74    4.96 
 -14  -7  -1   18.36    4.66 
  -7  14  -1   14.47    5.28 
   7 -14  -1   17.41    5.21 
 -14  -7  -1   17.47    4.86 
  -7  14  -1   19.89    5.85 
 -14  -7  -1   19.25    4.86 
 -14  -7  -1   10.81    5.01 
 -14  -7   1   20.76    5.39 
  -7  14   1   24.23    5.79 
 -14  -7   1   21.15    5.08 
   7 -14   1   22.18    5.08 
  -7  14   1   17.76    5.18 
 -14  -7   1   28.46    4.55 
 -14  -6  -1   10.30    4.32 
 -14  -6  -1   18.60    4.36 
  -6  14  -1   19.78    5.05 
 -14  -6  -1   12.38    4.29 
   6 -14  -1   17.13    4.85 
  -6  14  -1   18.89    5.29 
 -14  -6   1   13.79    4.37 
   6 -14   1    9.66    4.59 
 -14  -6   1    5.27    3.67 
  -6  14   1   14.34    4.79 
 -14  -6   1    3.60    3.78 
  -6  14   1   12.68    4.59 
   5 -14  -1   13.30    4.56 
 -14  -5  -1   15.26    4.48 
 -14  -5  -1   21.30    3.97 
  -5  14  -1   17.80    4.78 
 -14  -5  -1   14.65    4.79 
  -5  14  -1   17.89    5.13 
  14   5  -1   12.49    4.77 
 -14  -5   1   21.13    4.55 
  -5  14   1   20.67    4.89 
 -14  -5   1   19.51    3.82 
   5 -14   1   20.40    5.30 
 -14  -5   1   24.29    4.56 
  -5  14   1   20.54    5.07 
 -14  -4  -1   32.47    4.74 
  -4  14  -1   28.69    5.68 
 -14  -4  -1   26.62    4.10 
  14   4  -1   26.67    5.43 
 -14  -4  -1   24.67    4.79 
  -4  14  -1   31.82    5.42 
   4 -14  -1   28.41    5.72 
  -4  14   1   24.42    5.07 
 -14  -4   1   25.32    4.90 
   4 -14   1   21.66    4.88 
 -14  -4   1   23.08    4.47 
  14   4   1   25.57    5.07 
 -14  -4   1   31.63    5.08 
  -4  14   1   34.46    5.70 
  -3  14  -1   17.86    4.80 
  -3  14  -1   21.22    4.98 
  14   3  -1   11.49    5.00 
 -14  -3  -1   17.70    4.30 
   3 -14  -1   12.17    4.37 
 -14  -3  -1   19.71    4.08 
 -14  -3  -1   20.02    3.64 
  -3  14   1   21.93    4.85 
 -14  -3   1   23.45    4.16 
 -14  -3   1   15.00    4.36 
 -14  -3   1   15.96    3.27 
  -3  14   1   22.29    4.75 
   3 -14   1   17.66    4.57 
  14   3   1   17.66    4.73 
  14   2  -1   21.03    5.03 
 -14  -2  -1   19.12    4.11 
   2 -14  -1   18.89    4.91 
  -2  14  -1   18.43    4.79 
  -2  14  -1   22.70    4.58 
 -14  -2  -1   18.52    3.70 
 -14  -2  -1   20.43    3.52 
  -2  14   1   17.71    5.02 
 -14  -2   1   12.55    3.90 
  -2  14   1   23.98    4.92 
  14   2   1   18.72    4.90 
 -14  -2   1   11.68    3.66 
   2 -14   1   14.12    4.67 
 -14  -2   1   16.84    3.10 
 -14  -1  -1    8.70    3.21 
  -1  14  -1    9.27    4.23 
 -14  -1  -1   13.93    4.00 
  14   1  -1   21.81    5.06 
   1 -14  -1   12.46    4.19 
  -1  14  -1   15.45    4.23 
   1 -14   1   22.05    4.47 
 -14  -1   1   18.03    3.05 
 -14  -1   1   16.74    3.55 
 -14  -1   1   22.95    4.49 
  -1  14   1   19.67    4.64 
  14   1   1   12.18    4.57 
  -1  14   1   21.02    4.61 
 -14   0  -1   15.25    4.46 
   0 -14  -1   14.22    4.34 
  14   0  -1   15.30    4.65 
   0  14  -1   17.42    4.08 
 -14   0  -1   20.56    3.55 
   0  14  -1   14.39    4.18 
   0  14   1   16.52    4.65 
  14   0   1   21.26    5.32 
   0  14   1   14.57    4.75 
 -14   0   1   19.43    3.76 
   0 -14   1    9.94    4.54 
  14   0   1   14.35    2.72 
 -14   0   1   18.99    4.41 
 -14   1  -1   22.27    3.75 
   1  14  -1   20.87    4.72 
   1  14  -1   19.38    4.71 
  -1 -14  -1   15.13    4.81 
 -14   1  -1   14.98    4.25 
  14  -1  -1   22.25    3.44 
  14  -1  -1   20.76    4.98 
  14  -1   1   10.38    2.57 
 -14   1   1   13.67    4.18 
  -1 -14   1   17.03    4.43 
 -14   1   1   17.96    3.79 
   1  14   1   16.42    4.55 
  14  -1   1   14.19    4.62 
   1  14   1   12.62    4.29 
  14  -2  -1   12.42    4.66 
   2  14  -1   13.72    4.52 
  -2 -14  -1   21.19    4.95 
   2  14  -1   14.60    4.78 
 -14   2  -1   17.09    3.65 
 -14   2  -1   18.94    4.42 
  14  -2  -1   13.86    2.57 
  -2 -14   1   13.53    4.67 
  14  -2   1   24.94    4.02 
 -14   2   1   22.31    3.84 
  14  -2   1   25.38    5.05 
   2  14   1   17.51    4.67 
   2  14   1   23.31    4.67 
 -14   2   1   21.67    4.56 
  14  -3  -1   18.30    3.04 
   3  14  -1   23.85    5.08 
  -3 -14  -1   23.71    5.19 
  14  -3  -1   13.65    4.95 
   3  14  -1   21.40    5.12 
 -14   3  -1   32.07    5.00 
 -14   3  -1   21.87    3.96 
  14  -3   1   16.50    5.39 
   3  14   1   27.68    5.51 
  -3 -14   1   23.45    5.41 
  14  -3   1   17.50    3.14 
   3  14   1   19.36    4.78 
 -14   3   1   27.82    5.19 
 -14   3   1   25.51    4.08 
 -14   4  -1   24.89    5.02 
   4  14  -1   25.35    5.18 
  14  -4  -1   27.72    4.32 
  14  -4  -1   18.31    5.58 
 -14   4  -1   32.47    5.29 
   4  14  -1   22.70    5.01 
  -4 -14  -1   28.68    5.85 
  -4 -14   1   32.49    5.85 
   4  14   1   22.89    5.53 
  14  -4   1   30.07    5.96 
 -14   4   1   31.14    5.57 
 -14   4   1   26.89    4.38 
  14  -4   1   33.26    4.73 
   4  14   1   37.15    5.85 
 -14   5  -1   27.10    4.99 
   5  14  -1   22.75    5.23 
 -14   5  -1   21.85    3.87 
  14  -5  -1   14.88    5.05 
   5  14  -1   15.20    4.97 
  14  -5  -1   18.40    3.23 
  -5 -14  -1   26.66    6.00 
 -14   5   1   19.77    4.02 
 -14   5   1   15.17    4.90 
   5  14   1   18.92    5.06 
  14  -5   1   13.84    3.35 
  14  -5   1   20.70    5.39 
   5  14   1   23.64    4.97 
  -5 -14   1   18.88    5.12 
 -14   6  -1    8.39    4.76 
  -6 -14  -1   14.56    5.42 
 -14   6  -1   13.78    3.57 
  14  -6  -1    8.95    4.89 
   6  14  -1   11.40    4.89 
   6  14  -1   12.32    5.21 
   6  14   1   13.95    5.12 
 -14   6   1   21.38    5.19 
 -14   6   1   12.32    3.82 
  14  -6   1   19.69    5.52 
  -6 -14   1   10.10    5.45 
  14  -6   1   10.87    3.29 
   6  14   1   22.24    5.01 
  14  -7  -1   23.84    6.26 
 -14   7  -1   19.54    4.24 
   7  14  -1   20.68    5.26 
 -14   7  -1   23.02    5.71 
  -7 -14  -1   20.37    5.93 
  -7 -14   1   17.91    5.98 
  14  -7   1   19.32    6.06 
   7  14   1   24.23    6.03 
   7  14   1   22.48    5.35 
  14  -7   1   12.18    3.73 
 -14   7   1   19.25    4.37 
 -14   7   1   20.61    5.71 
  -5  15  -1    4.40    5.19 
 -15  -5  -1    5.40    4.46 
 -15  -5  -1   14.33    6.32 
  15   5  -1    4.93    4.82 
 -15  -5  -1    7.19    4.31 
   5 -15  -1   16.95    5.57 
  -5  15  -1   11.77    5.29 
   5 -15   1    5.58    4.49 
 -15  -5   1    3.64    4.05 
  -5  15   1    2.98    4.62 
  -5  15   1    5.59    4.67 
 -15  -5   1    3.57    4.58 
  15   4  -1    6.63    5.00 
   4 -15  -1   21.86    5.58 
  -4  15  -1   14.35    5.40 
  -4  15  -1    8.60    4.55 
 -15  -4  -1   13.87    4.47 
 -15  -4  -1   12.88    4.66 
 -15  -4  -1   14.71    4.40 
 -15  -4   1    9.82    4.87 
  -4  15   1   20.06    5.07 
   4 -15   1   20.22    5.59 
  -4  15   1   23.84    5.49 
 -15  -4   1   13.65    4.43 
 -15  -3  -1    9.83    3.86 
  -3  15  -1   13.64    4.92 
   3 -15  -1   10.36    4.64 
 -15  -3  -1   14.44    4.58 
  -3  15  -1   16.36    5.01 
 -15  -3  -1   12.65    3.95 
  15   3  -1    2.80    4.53 
  -3  15   1    7.31    5.13 
 -15  -3   1    9.93    4.61 
  -3  15   1   11.68    5.20 
   3 -15   1   10.25    4.91 
  15   2  -1    1.47    4.62 
  -2  15  -1    9.86    4.62 
  -2  15  -1    5.68    4.65 
 -15  -2  -1   13.96    4.36 
 -15  -2  -1    8.23    3.74 
   2 -15  -1    6.85    4.71 
 -15  -2  -1    7.78    3.50 
  -2  15   1   19.59    5.28 
 -15  -2   1   14.60    4.42 
  -2  15   1   19.09    5.04 
 -15  -2   1   20.58    4.26 
  15   2   1   11.35    5.09 
   2 -15   1   12.44    4.91 
   1 -15  -1    7.22    4.78 
  -1  15  -1    9.95    4.50 
 -15  -1  -1    9.85    3.87 
 -15  -1  -1    7.26    4.07 
  -1  15  -1    5.96    4.62 
  15   1  -1   20.79    5.85 
 -15  -1   1    7.68    4.11 
  -1  15   1   16.02    4.74 
  -1  15   1   17.71    5.24 
 -15  -1   1    8.34    3.46 
   1 -15   1    7.01    4.53 
  15   1   1    1.71    4.44 
 -15   0  -1   10.81    3.62 
 -15   0  -1   15.75    4.77 
   0  15  -1   14.92    5.17 
  15   0  -1   12.04    5.29 
   0 -15  -1    5.06    4.65 
   0  15  -1   19.87    5.01 
   0  15   1   11.91    5.07 
 -15   0   1   14.04    4.53 
   0  15   1   11.91    4.81 
  15   0   1   10.59    5.11 
   0 -15   1   13.69    5.03 
 -15   0   1   15.01    4.06 
  -1 -15  -1    6.46    4.81 
 -15   1  -1    4.26    3.92 
   1  15  -1   18.78    5.38 
  15  -1  -1   14.85    5.19 
   1  15  -1   10.57    5.03 
 -15   1  -1    9.17    3.63 
  -1 -15   1   12.32    4.92 
   1  15   1   15.32    5.16 
  15  -1   1    8.60    5.05 
   1  15   1   10.66    4.73 
 -15   1   1    4.84    3.74 
 -15   1   1    9.84    4.35 
 -15   2  -1   13.50    5.03 
   2  15  -1   14.63    5.17 
   2  15  -1    8.08    4.94 
  -2 -15  -1   10.66    5.31 
 -15   2  -1   17.36    3.89 
  15  -2  -1   20.15    5.31 
 -15   2   1   10.67    3.96 
   2  15   1    5.55    4.57 
   2  15   1   10.40    4.67 
  -2 -15   1   11.51    4.85 
  15  -2   1    6.67    5.03 
 -15   2   1   11.26    4.69 
 -15   3  -1   12.35    3.76 
 -15   3  -1   14.63    4.69 
   3  15  -1   10.69    5.09 
   3  15  -1   15.62    4.87 
  15  -3  -1   10.44    5.52 
  -3 -15  -1    9.80    4.97 
 -15   3   1   14.43    4.64 
   3  15   1   16.97    5.21 
  -3 -15   1    5.94    4.74 
  15  -3   1    5.55    4.98 
   3  15   1    9.95    5.86 
 -15   3   1   15.04    4.06 
   4  15  -1   17.52    5.99 
 -15   4  -1   18.33    5.14 
  -4 -15  -1    9.71    5.49 
 -15   4  -1   19.31    4.21 
   4  15  -1   10.50    5.10 
  15  -4  -1   18.44    5.95 
   4  15   1   15.86    5.13 
 -15   4   1   17.57    5.77 
 -15   4   1   18.30    4.28 
  15  -4   1   16.11    5.83 
  -4 -15   1   12.84    5.50 
   4  15   1   21.24    5.66 
 -15   5  -1   12.21    4.15 
  15  -5  -1   15.80    5.87 
   5  15  -1    2.06    5.24 
   5  15  -1    6.78    5.46 
 -15   5  -1    1.27    4.41 
  -5 -15  -1    3.56    5.38 
 -15   5   1   10.91    5.02 
   5  15   1    7.10    4.88 
  -5 -15   1   14.20    5.33 
   5  15   1   14.08    5.63 
  15  -5   1   10.17    5.79 
 -15   5   1   14.98    4.24 
   1  -1  -2    9.53    0.72 
   1  -1  -2    8.47    0.66 
  -1   1  -2    9.33    0.76 
   1  -1  -2    8.98    0.76 
  -1  -1  -2    7.88    0.71 
   1   1  -2    8.37    0.67 
   1   1  -2    9.04    0.78 
  -1   1  -2    8.93    0.72 
  -1   1  -2    7.97    0.57 
   1   1  -2    8.65    0.66 
  -1   1  -2   10.15    0.73 
   1  -1  -2    8.26    0.72 
  -1  -1  -2    8.46    0.73 
  -1   1   2    9.17    0.74 
   1  -1   2    9.40    0.57 
  -1  -1   2    8.94    0.74 
  -1  -1   2    8.82    0.67 
  -1   1   2    8.29    0.70 
   1   1   2    8.86    0.66 
   1  -1   2    8.44    0.75 
   1   1   2    8.71    0.75 
   1   1   2    7.70    0.69 
  -1  -1   2    8.38    0.75 
   1   1   2    8.54    0.71 
   1  -1   2    7.91    0.68 
  -1   1   2    7.87    0.72 
   2   1  -2  319.07   17.21 
  -1   2  -2  304.91   17.15 
   1  -2  -2  335.32   17.13 
  -1   2  -2  346.35   17.08 
  -1   2  -2  321.37   17.21 
  -2  -1  -2  340.56   17.16 
   1  -2  -2  325.37   17.16 
  -2  -1  -2  303.45   17.15 
   1  -2  -2  327.45   17.14 
  -2  -1  -2  322.09   17.10 
   2   1  -2  318.79   17.00 
   2   1  -2  305.87   17.13 
   2   1  -2  316.88   17.18 
   1  -2  -2  321.65   17.14 
  -1   2  -2  302.35   17.04 
  -2  -1  -2  327.72   17.10 
   1  -2   2  292.07   17.02 
   1  -2   2  289.83   17.13 
  -1   2   2  281.32   17.11 
  -1   2   2  280.79   17.11 
   2   1   2  272.66   17.05 
  -2  -1   2  284.85   17.10 
  -2  -1   2  277.16   16.98 
  -1   2   2  277.38   17.07 
  -1   2   2  289.13   17.12 
   2   1   2  270.35   17.06 
   2   1   2  269.61   17.10 
   1  -2   2  267.25   17.15 
  -2  -1   2  307.85   17.16 
   1  -2   2  266.72   17.02 
   0  -2  -2   69.48    4.22 
  -2   0  -2   67.95    4.17 
   2   0  -2   75.16    4.30 
   0   2  -2   63.99    4.22 
   0   2  -2   73.40    4.28 
   0  -2  -2   67.15    4.12 
   2   0  -2   71.54    4.27 
  -2   0  -2   71.84    4.26 
   2   0  -2   72.85    4.21 
   0  -2  -2   65.76    4.25 
  -2   0  -2   70.83    4.07 
  -2   0  -2   71.74    4.17 
   0   2  -2   69.70    4.03 
  -2   0  -2   71.48    4.06 
   0  -2  -2   72.08    4.17 
   0   2  -2   70.79    4.21 
   0  -2   2   68.50    4.26 
  -2   0   2   73.37    3.97 
   0  -2   2   73.39    4.25 
   2   0   2   68.25    4.26 
  -2   0   2   69.34    4.21 
  -2   0   2   71.28    4.28 
   2   0   2   68.84    4.16 
   0   2   2   71.39    4.14 
   0  -2   2   70.42    4.20 
   2   0   2   63.77    4.16 
   0   2   2   72.49    4.25 
   0   2   2   73.03    4.29 
  -2   0   2   71.55    4.27 
   0   2   2   67.56    4.17 
   0  -2   2   71.50    4.03 
  -1  -2  -2  287.20   16.93 
   1   2  -2  274.92   16.67 
   1   2  -2  276.79   16.89 
   2  -1  -2  282.01   16.81 
   2  -1  -2  282.06   16.91 
  -2   1  -2  260.71   16.64 
   2  -1  -2  279.99   16.87 
   1   2  -2  281.71   16.92 
  -1  -2  -2  281.92   16.86 
  -2   1  -2  277.93   16.83 
  -1  -2  -2  269.88   16.76 
  -1  -2  -2  274.97   16.80 
   1   2  -2  293.77   16.87 
  -1  -2   2  336.61   16.96 
  -2   1   2  316.04   16.85 
  -1  -2   2  306.54   16.69 
  -2   1   2  317.18   16.92 
  -2   1   2  310.93   16.95 
   2  -1   2  317.47   16.66 
   2  -1   2  317.35   16.87 
  -1  -2   2  323.02   16.90 
  -1  -2   2  317.85   16.95 
  -2   1   2  306.30   16.71 
   2  -1   2  265.32   16.87 
   1   2   2  313.32   16.91 
   1   2   2  325.84   16.80 
   1   2   2  314.19   16.84 
   2  -1   2  314.91   16.86 
  -2  -2  -2    6.75    0.75 
   2   2  -2    6.41    0.78 
   2  -2  -2    7.38    0.85 
   2  -2  -2    6.56    0.79 
  -2   2  -2    6.77    0.89 
  -2  -2  -2    7.09    0.80 
  -2   2  -2    7.89    0.69 
   2   2  -2    7.20    0.74 
  -2  -2  -2    6.65    0.87 
   2  -2  -2    7.79    0.84 
  -2   2  -2    6.95    0.80 
   2   2  -2    6.52    0.90 
   2  -2  -2    6.90    0.88 
  -2   2  -2    6.07    0.87 
  -2  -2  -2    7.55    0.81 
  -2  -2  -2    8.73    0.91 
  -2   2   2    6.65    0.82 
   2   2   2    6.91    0.87 
  -2   2   2    6.55    0.86 
   2  -2   2    7.27    0.81 
   2  -2   2    6.99    0.84 
  -2  -2   2    6.97    0.78 
   2  -2   2    7.60    0.91 
  -2   2   2    6.97    0.76 
  -2  -2   2    7.71    0.89 
  -2  -2   2    7.79    0.74 
  -2  -2   2    6.82    0.91 
  -2   2   2    7.00    0.82 
   2  -2   2    8.20    0.69 
   2   2   2    6.59    0.81 
  -3  -2  -2  196.21   11.92 
   2  -3  -2  213.89   11.98 
   3   2  -2  207.24   11.93 
   2  -3  -2  209.87   11.94 
   2  -3  -2  199.24   11.92 
  -2   3  -2  197.76   12.00 
  -2   3  -2  218.24   11.84 
  -3  -2  -2  215.08   11.97 
  -3  -2  -2  206.06   11.95 
   3   2  -2  218.37   12.12 
  -2   3  -2  227.08   11.92 
  -3  -2  -2  215.96   11.99 
   3   2   2  223.07   12.02 
   3   2   2  202.89   11.95 
   2  -3   2  200.97   11.79 
   2  -3   2  192.38   12.00 
  -2   3   2  200.31   11.98 
   2  -3   2  189.76   12.16 
   3   2   2  205.64   11.96 
  -2   3   2  225.44   11.98 
  -3  -2   2  206.77   11.85 
  -3  -2   2  205.90   12.04 
  -3  -2   2  199.08   11.89 
  -2   3   2  201.05   11.95 
   3   2   2  203.76   11.97 
   2  -3   2  202.73   11.88 
  -3  -2   2  193.62   12.27 
  -2   3   2  196.00   11.92 
  -1   3  -2   15.62    1.36 
  -3  -1  -2   15.97    1.43 
  -3  -1  -2   15.62    1.35 
  -3  -1  -2   17.58    1.39 
   1  -3  -2   15.63    1.40 
   3   1  -2   14.86    1.41 
   1  -3  -2   15.63    1.32 
  -1   3  -2   17.12    1.55 
  -1   3  -2   16.42    1.25 
  -3  -1  -2   16.79    1.38 
  -3  -1  -2   16.87    1.37 
   1  -3  -2   17.84    1.43 
  -1   3  -2   16.06    1.47 
   3   1  -2   14.65    1.43 
   1  -3  -2   17.64    1.49 
  -1   3   2   20.66    1.37 
  -1   3   2   20.34    1.53 
   3   1   2   20.88    1.47 
  -3  -1   2   17.06    1.22 
   1  -3   2   19.16    1.59 
   1  -3   2   18.13    1.46 
  -1   3   2   17.95    1.45 
  -3  -1   2   20.22    1.28 
   1  -3   2   19.47    1.29 
   1  -3   2   21.18    1.42 
   3   1   2   19.15    1.51 
  -3  -1   2   18.98    1.50 
  -3  -1   2   18.70    1.48 
  -1   3   2   19.98    1.48 
   3   0  -2  577.88   31.24 
   0  -3  -2  542.29   31.13 
  -3   0  -2  540.57   31.04 
   3   0  -2  605.50   30.85 
   0  -3  -2  529.57   31.20 
   3   0  -2  587.83   31.12 
  -3   0  -2  533.72   30.94 
   0   3  -2  540.33   31.18 
  -3   0  -2  537.24   31.09 
   0   3  -2  549.35   30.80 
   0  -3  -2  566.23   31.10 
  -3   0  -2  562.77   31.21 
   0   3  -2  524.58   30.81 
   0  -3  -2  541.66   30.94 
   3   0  -2  558.01   31.22 
   0   3  -2  534.89   31.12 
   0   3  -2  584.85   31.25 
   3   0   2  587.25   31.24 
   0   3   2  561.18   31.22 
   0  -3   2  522.69   31.10 
   0  -3   2  577.80   31.20 
   0  -3   2  536.26   31.19 
   3   0   2  569.97   31.13 
   3   0   2  555.23   31.06 
   0   3   2  533.92   31.10 
  -3   0   2  555.90   30.83 
   0   3   2  541.58   30.95 
   0   3   2  538.69   31.16 
  -3   0   2  554.79   31.21 
  -3   0   2  533.13   31.18 
  -3   0   2  526.96   31.08 
  -3   1  -2   20.68    1.58 
  -1  -3  -2   19.70    1.31 
   3  -1  -2   19.79    1.60 
   1   3  -2   20.86    1.57 
  -3   1  -2   21.79    1.48 
  -1  -3  -2   20.69    1.63 
   1   3  -2   19.90    1.56 
   3  -1  -2   19.63    1.48 
   3  -1  -2   20.26    1.24 
  -1  -3  -2   17.70    1.50 
   3  -1  -2   20.11    1.43 
   1   3  -2   20.47    1.12 
   1   3  -2   17.98    1.53 
  -3   1  -2   19.54    1.25 
  -1  -3  -2   20.58    1.45 
  -3   1  -2   21.54    1.51 
   1   3   2   14.49    1.49 
   3  -1   2   15.72    1.39 
  -3   1   2   15.53    1.48 
  -3   1   2   14.84    1.21 
   3  -1   2   16.82    1.42 
  -1  -3   2   15.78    1.11 
  -3   1   2   15.17    1.38 
   3  -1   2   17.11    1.22 
   3  -1   2   16.32    1.53 
   1   3   2   16.63    1.55 
  -1  -3   2   17.93    1.52 
  -1  -3   2   15.61    1.46 
   1   3   2   16.16    1.43 
  -1  -3   2   15.70    1.49 
  -3   1   2   17.22    1.55 
   1   3   2   16.99    1.26 
   2   3  -2  206.24   11.72 
  -3   2  -2  192.44   11.94 
   2   3  -2  198.94   11.97 
  -3   2  -2  198.60   11.99 
   3  -2  -2  224.74   12.10 
   3  -2  -2  203.09   12.05 
   2   3  -2  201.27   12.06 
   2   3  -2  171.88   11.99 
  -2  -3  -2  211.66   11.96 
   3  -2  -2  197.69   11.81 
  -2  -3  -2  205.61   11.80 
  -2  -3  -2  202.95   12.06 
   3  -2  -2  202.95   11.88 
  -3   2  -2  211.66   11.73 
  -3   2  -2  212.41   11.97 
  -2  -3  -2  197.82   11.81 
  -2  -3   2  207.94   11.97 
   3  -2   2  224.42   12.08 
   3  -2   2  204.61   11.71 
   3  -2   2  203.19   11.94 
  -3   2   2  215.39   11.83 
   2   3   2  211.09   11.98 
   2   3   2  211.69   12.05 
  -2  -3   2  224.71   11.74 
  -3   2   2  208.84   12.02 
  -3   2   2  206.46   11.89 
  -2  -3   2  227.26   12.30 
  -3   2   2  182.15   12.17 
  -2  -3   2  212.41   12.11 
   3  -3  -2   63.17    3.95 
   3  -3  -2   57.81    3.89 
   3   3  -2   59.21    3.81 
  -3   3  -2   61.70    3.77 
  -3  -3  -2   60.17    3.85 
  -3   3  -2   58.62    3.99 
  -3  -3  -2   68.17    4.04 
  -3  -3  -2   60.90    4.05 
  -3  -3  -2   56.41    3.95 
   3  -3  -2   59.94    4.00 
   3   3  -2   63.83    4.13 
   3  -3  -2   60.68    4.01 
   3   3  -2   61.96    3.94 
  -3   3  -2   64.01    4.05 
   3   3   2   54.66    3.96 
  -3   3   2   60.56    4.01 
  -3  -3   2   61.88    4.11 
   3   3   2   63.72    4.02 
   3  -3   2   59.15    3.97 
   3  -3   2   59.43    4.01 
  -3   3   2   62.87    4.06 
  -3  -3   2   60.34    3.93 
  -3   3   2   58.89    3.90 
   3  -3   2   61.22    3.75 
  -3   3   2   59.10    3.90 
  -3  -3   2   67.26    4.14 
   3  -3   2   68.01    4.04 
  -3  -3   2   57.63    3.78 
  -3   4  -2   81.28    4.93 
   3  -4  -2   76.51    5.03 
  -3   4  -2   81.41    5.24 
  -4  -3  -2   78.48    5.10 
  -3   4  -2   69.55    5.44 
   3  -4  -2   81.22    5.12 
   3  -4  -2   81.02    5.13 
  -4  -3  -2   90.81    5.19 
   3  -4  -2   79.79    5.01 
  -4  -3  -2   90.43    5.13 
   4   3  -2   74.98    4.98 
  -3   4  -2   87.66    5.25 
  -4  -3  -2   78.32    5.02 
   3  -4   2   75.26    5.15 
  -4  -3   2   81.74    5.21 
   4   3   2   77.80    5.13 
   3  -4   2   77.78    5.02 
  -4  -3   2   71.67    5.14 
  -3   4   2   80.45    5.09 
  -3   4   2   80.14    5.07 
   4   3   2   76.44    5.04 
   3  -4   2   78.97    5.11 
  -4  -3   2   75.27    4.96 
  -3   4   2   76.62    5.58 
   4   3   2   72.18    5.06 
   3  -4   2   84.32    4.90 
  -3   4   2   81.51    5.07 
  -4  -3   2   80.43    5.22 
  -2   4  -2   17.85    1.50 
   4   2  -2   17.95    1.63 
  -2   4  -2   19.49    1.46 
   2  -4  -2   22.42    1.66 
  -4  -2  -2   18.98    1.62 
   2  -4  -2   18.67    1.50 
  -4  -2  -2   19.99    1.62 
   4   2  -2   21.13    1.67 
  -4  -2  -2   19.30    1.63 
   2  -4  -2   20.65    1.72 
  -2   4  -2   21.30    1.73 
   4   2   2   17.52    1.58 
  -2   4   2   16.54    1.47 
   2  -4   2   14.95    1.44 
  -2   4   2   17.64    1.66 
  -4  -2   2   15.41    1.63 
  -4  -2   2   17.24    1.40 
  -2   4   2   16.50    1.64 
  -2   4   2   16.58    1.55 
   2  -4   2   15.94    1.61 
   2  -4   2   16.01    1.39 
   2  -4   2   16.24    1.70 
   4   2   2   17.12    1.59 
  -4  -2   2   14.95    1.65 
  -4  -2   2   16.44    1.59 
  -4  -2   2   14.22    1.61 
  -4  -2   2   16.38    1.42 
  -4  -1  -2  403.57   22.22 
  -1   4  -2  358.14   22.34 
   1  -4  -2  394.81   22.32 
  -1   4  -2  375.39   22.26 
  -4  -1  -2  374.53   22.19 
  -4  -1  -2  397.90   22.40 
   1  -4  -2  381.03   22.40 
   4   1  -2  349.44   22.34 
  -1   4  -2  387.92   22.02 
  -4  -1  -2  401.59   22.20 
  -1   4  -2  407.64   22.47 
  -4  -1  -2  384.09   22.31 
   1  -4  -2  403.98   22.32 
   4   1  -2  391.13   22.32 
   1  -4  -2  405.00   22.13 
   4   1   2  378.79   22.22 
  -4  -1   2  401.04   22.02 
   4   1   2  396.65   22.42 
   1  -4   2  354.00   22.23 
  -1   4   2  370.01   22.31 
  -1   4   2  394.69   22.36 
  -4  -1   2  420.15   22.44 
  -1   4   2  409.66   22.14 
  -4  -1   2  421.36   22.42 
  -4  -1   2  401.27   22.47 
  -1   4   2  407.21   22.45 
   1  -4   2  380.08   22.42 
   1  -4   2  397.90   22.36 
  -4  -1   2  397.91   22.32 
   1  -4   2  386.44   22.02 
   0  -4  -2   -0.47    0.39 
   0  -4  -2   -0.20    0.39 
   0   4  -2    0.03    0.13 
   4   0  -2    0.19    0.43 
   0   4  -2    0.10    0.13 
   0   4  -2    0.47    0.46 
  -4   0  -2    0.04    0.34 
  -4   0  -2   -0.26    0.36 
   4   0  -2   -0.42    0.39 
   0  -4  -2    0.16    0.45 
  -4   0  -2   -0.50    0.44 
   0   4  -2   -0.93    0.39 
   4   0  -2    0.22    0.24 
   0  -4  -2    0.13    0.26 
   0   4  -2    0.38    0.52 
  -4   0  -2   -0.14    0.35 
   0   4   2    0.26    0.48 
  -4   0   2    0.29    0.41 
   0  -4   2   -0.06    0.48 
   4   0   2    0.31    0.49 
   4   0   2   -0.25    0.35 
  -4   0   2    0.37    0.41 
   0   4   2   -0.41    0.47 
  -4   0   2    0.22    0.25 
   0   4   2   -0.53    0.42 
   0   4   2    0.09    0.27 
   0  -4   2   -0.18    0.45 
   0  -4   2    0.39    0.45 
  -4   0   2   -0.23    0.47 
  -4   1  -2  406.43   22.48 
   1   4  -2  411.18   22.70 
   4  -1  -2  376.10   22.68 
  -1  -4  -2  366.28   22.70 
  -4   1  -2  398.39   22.69 
   4  -1  -2  393.32   22.24 
   1   4  -2  397.11   22.66 
   4  -1  -2  363.56   22.62 
  -1  -4  -2  452.17   22.71 
   4  -1  -2  406.55   22.66 
  -4   1  -2  393.81   22.57 
  -1  -4  -2  392.85   22.26 
  -1  -4  -2  411.47   22.76 
  -4   1  -2  388.69   22.29 
   1   4  -2  374.67   22.65 
  -1  -4   2  417.39   22.68 
   4  -1   2  371.89   22.42 
   4  -1   2  386.58   22.30 
  -4   1   2  395.32   22.27 
   1   4   2  390.63   22.58 
  -1  -4   2  397.77   22.67 
   1   4   2  407.13   22.73 
   1   4   2  396.20   22.26 
  -4   1   2  391.75   22.65 
   4  -1   2  392.85   22.58 
  -1  -4   2  416.80   22.66 
   4  -1   2  404.02   22.72 
  -4   1   2  388.30   22.48 
   1   4   2  383.62   22.63 
  -4   2  -2   16.62    1.36 
   4  -2  -2   16.17    1.52 
  -4   2  -2   16.67    1.62 
   2   4  -2   17.06    1.74 
   2   4  -2   16.88    1.23 
  -2  -4  -2   17.78    1.72 
   2   4  -2   16.03    1.68 
   2   4  -2   17.75    1.74 
   4  -2  -2   18.57    1.70 
   4  -2  -2   14.55    1.38 
  -2  -4  -2   18.97    1.73 
  -4   2  -2   16.08    1.61 
  -2  -4  -2   17.91    1.61 
   4  -2  -2   19.39    1.70 
  -2  -4  -2   16.30    1.38 
  -2  -4  -2   17.12    1.36 
  -4   2   2   19.78    1.72 
   4  -2   2   19.22    1.76 
   2   4   2   20.36    1.72 
  -2  -4   2   23.27    1.85 
  -2  -4   2   19.95    1.73 
  -4   2   2   22.33    1.86 
   4  -2   2   20.44    1.63 
  -4   2   2   19.40    1.59 
  -2  -4   2   22.01    1.79 
   2   4   2   20.45    1.81 
   4  -2   2   19.23    1.61 
   4  -2   2   21.51    1.41 
  -4   2   2   20.82    1.51 
  -4   3  -2   80.93    5.10 
  -4   3  -2   76.22    4.76 
  -3  -4  -2   75.24    5.06 
  -3  -4  -2   80.44    4.83 
  -3  -4  -2   76.08    5.03 
   3   4  -2   78.85    5.08 
  -4   3  -2   83.30    5.07 
   4  -3  -2   81.10    5.11 
  -3  -4  -2   75.20    4.83 
   3   4  -2   74.61    4.72 
   3   4  -2   65.48    5.15 
  -3  -4  -2   83.29    5.14 
   4  -3  -2   79.11    5.11 
   4  -3  -2   76.58    4.92 
  -3  -4  -2   72.15    5.09 
   4  -3  -2   75.77    4.89 
   4  -3   2   80.22    4.75 
   4  -3   2   78.94    5.05 
  -3  -4   2   85.80    5.10 
  -3  -4   2   81.31    4.74 
  -4   3   2   81.07    4.95 
  -3  -4   2   83.95    5.21 
  -4   3   2   80.59    5.24 
  -3  -4   2   81.34    5.19 
  -4   3   2   82.20    4.93 
   4  -3   2   74.27    4.99 
   4  -3   2   74.26    5.07 
   3   4   2   76.76    5.08 
  -4   3   2   77.69    5.09 
  -4  -4  -2  240.07   15.27 
  -4  -4  -2  262.34   15.49 
  -4   4  -2  260.37   15.02 
  -4  -4  -2  281.71   15.38 
   4  -4  -2  226.32   15.53 
   4  -4  -2  278.34   15.40 
  -4  -4  -2  267.80   15.31 
   4   4  -2  276.37   15.55 
   4  -4  -2  255.80   15.19 
  -4   4  -2  250.84   15.38 
  -4   4  -2  262.50   15.26 
   4  -4  -2  273.31   15.17 
  -4   4  -2  260.93   15.32 
   4   4  -2  255.96   15.06 
  -4  -4  -2  257.11   15.33 
   4  -4   2  269.70   15.36 
  -4   4   2  272.63   15.35 
  -4   4   2  251.21   15.34 
   4  -4   2  270.01   15.32 
  -4  -4   2  251.10   15.21 
  -4   4   2  267.76   15.22 
   4   4   2  256.05   15.43 
  -4   4   2  256.21   15.17 
  -4  -4   2  258.75   15.41 
  -4  -4   2  257.39   15.03 
  -4  -4   2  261.30   15.45 
  -5  -4  -2  129.48    8.15 
  -4   5  -2  135.48    7.82 
  -5  -4  -2  130.26    8.08 
  -5  -4  -2  130.42    8.06 
   4  -5  -2  129.97    7.89 
  -4   5  -2  128.14    8.11 
   5   4  -2  122.51    8.22 
  -4   5  -2  130.48    8.26 
   4  -5  -2  140.05    8.13 
  -5  -4  -2  141.21    7.96 
   4  -5  -2  125.39    8.06 
   4  -5  -2  126.83    8.12 
  -5  -4  -2  130.63    7.98 
   5   4  -2  130.11    7.87 
  -4   5   2  119.54    7.91 
  -5  -4   2  130.24    7.84 
   4  -5   2  129.86    7.74 
   4  -5   2  127.86    8.07 
   5   4   2  126.57    8.15 
  -5  -4   2  127.21    8.16 
   4  -5   2  121.90    8.12 
   5   4   2  118.70    8.13 
  -4   5   2  123.91    8.17 
   4  -5   2  117.71    8.23 
  -5  -4   2  124.59    8.10 
  -5  -4   2  135.39    7.91 
  -4   5   2  128.84    8.00 
  -4   5   2  130.78    8.01 
  -5  -4   2  123.50    7.89 
  -3   5  -2  100.16    6.75 
  -5  -3  -2   96.71    6.58 
  -3   5  -2   97.99    6.78 
   3  -5  -2   97.98    6.51 
  -3   5  -2   92.29    6.45 
  -5  -3  -2  102.71    6.65 
  -5  -3  -2   97.81    6.55 
   5   3  -2   98.84    6.59 
  -3   5  -2   94.71    6.43 
   3  -5  -2   91.62    6.96 
   5   3  -2   97.35    6.86 
   3  -5  -2   98.55    6.63 
   3  -5  -2   98.70    6.54 
  -5  -3  -2   95.73    6.63 
  -3   5   2  112.94    6.76 
   3  -5   2  116.86    6.56 
   3  -5   2  112.51    6.72 
  -5  -3   2  106.28    6.81 
   3  -5   2  105.43    6.88 
  -3   5   2  118.98    6.81 
  -5  -3   2  114.68    6.51 
  -5  -3   2  116.18    6.65 
  -3   5   2  115.35    6.60 
  -3   5   2  115.62    6.92 
  -5  -3   2  113.43    6.55 
  -5  -3   2  113.77    6.82 
   5   3   2  108.37    6.86 
   5   3   2  106.40    6.69 
   3  -5   2  115.56    6.50 
  -5  -3   2  116.10    6.89 
  -2   5  -2  177.95   10.20 
  -5  -2  -2  174.66   10.15 
   2  -5  -2  176.12   10.07 
  -2   5  -2  158.08   10.38 
  -5  -2  -2  170.42   10.27 
   2  -5  -2  180.44   10.31 
  -5  -2  -2  178.73   10.22 
  -2   5  -2  174.41   10.41 
  -5  -2  -2  184.03   10.26 
   2  -5  -2  184.58   10.26 
   5   2  -2  166.13   10.30 
  -5  -2  -2  181.13   10.34 
  -2   5  -2  186.01   10.01 
  -5  -2   2  170.77   10.33 
  -5  -2   2  157.86   10.57 
   5   2   2  158.83   10.14 
   2  -5   2  167.29   10.29 
   2  -5   2  181.49   10.16 
  -5  -2   2  180.66    9.99 
  -2   5   2  173.51   10.06 
  -2   5   2  167.07   10.34 
  -2   5   2  161.62   10.33 
  -2   5   2  167.93   10.62 
  -5  -2   2  161.97   10.33 
   2  -5   2  165.45   10.45 
  -5  -2   2  160.28    9.99 
   2  -5   2  167.25    9.97 
  -5  -2   2  160.42   10.23 
  -5  -1  -2    2.22    0.62 
  -1   5  -2    2.76    0.44 
  -5  -1  -2    2.31    0.76 
   1  -5  -2    1.22    0.59 
  -5  -1  -2    2.52    0.73 
   1  -5  -2    2.18    0.67 
   5   1  -2    1.88    0.45 
  -1   5  -2    1.75    0.96 
   1  -5  -2    2.58    0.54 
   5   1  -2    2.01    0.85 
  -5  -1  -2    2.72    0.75 
  -5  -1  -2    1.99    0.70 
  -1   5  -2    2.50    0.68 
  -1   5  -2    1.04    0.77 
   5   1  -2    2.89    0.76 
  -5  -1  -2    1.89    0.62 
   1  -5   2    1.40    0.60 
  -5  -1   2    1.59    0.64 
  -5  -1   2    1.72    0.72 
  -5  -1   2    1.59    0.45 
   5   1   2    1.71    0.63 
   1  -5   2    2.24    0.42 
   1  -5   2    2.48    0.74 
  -5  -1   2    1.34    0.96 
  -5  -1   2    0.51    0.56 
  -1   5   2    1.39    0.45 
   1  -5   2    1.73    1.08 
  -1   5   2    1.76    0.75 
   0   5  -2  147.02    9.25 
  -5   0  -2  166.98    9.31 
   0   5  -2  132.75    9.26 
   5   0  -2  168.09    8.77 
   5   0  -2  162.83    9.10 
   5   0  -2  133.44    9.62 
  -5   0  -2  151.32    9.14 
  -5   0  -2  145.99    8.87 
   0  -5  -2  148.58    8.72 
   0  -5  -2  134.01    9.56 
   0  -5  -2  151.39    9.09 
   0  -5  -2  157.60    9.17 
   0   5  -2  157.85    9.21 
   5   0   2  145.34    9.38 
   0   5   2  154.91    8.76 
  -5   0   2  161.90    9.29 
   0   5   2  135.79    9.48 
  -5   0   2  158.89    8.75 
   0  -5   2  150.57    9.42 
   0  -5   2  158.75    9.21 
   0  -5   2  168.99    9.23 
   0   5   2  152.75    9.28 
   5   0   2  158.79    9.00 
   5   0   2  159.58    9.19 
   0   5   2  148.49    9.15 
  -5   0   2  145.21    9.02 
  -5   0   2  134.09    9.51 
  -1  -5  -2    1.48    0.63 
   1   5  -2    2.10    0.73 
   5  -1  -2    1.10    0.98 
   1   5  -2    0.94    1.08 
  -5   1  -2    1.31    0.60 
  -5   1  -2    1.05    0.78 
  -1  -5  -2    1.46    0.36 
   1   5  -2    1.42    0.95 
  -1  -5  -2    2.09    0.72 
  -5   1  -2    2.02    0.75 
   5  -1  -2    0.43    0.57 
   5  -1  -2    2.05    0.44 
   5  -1  -2    1.14    0.58 
  -1  -5  -2    0.92    1.05 
  -5   1  -2    1.18    0.48 
  -1  -5   2    2.74    0.73 
   1   5   2    1.61    1.04 
   1   5   2    2.66    0.86 
  -5   1   2    1.76    0.69 
  -5   1   2    3.08    1.09 
   5  -1   2    1.92    1.14 
   5  -1   2    1.67    0.61 
  -1  -5   2    2.56    0.69 
  -1  -5   2    2.69    1.12 
   5  -1   2    2.36    0.61 
   1   5   2    2.59    0.41 
  -5   1   2    2.37    0.52 
   5  -1   2    2.63    0.54 
   1   5   2    2.87    0.74 
  -5   1   2    3.22    0.76 
  -5   2  -2  158.46    9.74 
   5  -2  -2  144.96   10.21 
  -2  -5  -2  167.62    9.67 
   5  -2  -2  170.52    9.78 
   2   5  -2  160.84   10.32 
   5  -2  -2  167.86   10.17 
   5  -2  -2  169.58    9.95 
  -2  -5  -2  167.78    9.71 
  -5   2  -2  184.37   10.29 
  -5   2  -2  163.89    9.98 
   2   5  -2  153.29   10.23 
  -2  -5  -2  174.73   10.11 
  -2  -5  -2  166.71   10.17 
   2   5  -2  164.12   10.17 
  -5   2  -2  162.55   10.16 
  -2  -5  -2  168.38   10.36 
  -2  -5   2  170.56   10.34 
  -5   2   2  160.92   10.20 
  -2  -5   2  172.41   10.20 
  -2  -5   2  170.98    9.50 
   5  -2   2  168.69    9.96 
  -2  -5   2  177.18   10.26 
   5  -2   2  174.09   10.14 
   5  -2   2  161.21   10.31 
   2   5   2  166.50   10.27 
  -5   2   2  183.21   10.31 
  -5   2   2  175.11    9.82 
   5  -2   2  173.98    9.77 
   2   5   2  163.92   10.20 
   2   5   2  174.83   10.31 
  -2  -5   2  172.96    9.50 
  -5   2   2  170.16    9.97 
   3   5  -2  122.65    6.96 
  -3  -5  -2  120.20    6.86 
   5  -3  -2  103.68    6.98 
   5  -3  -2  106.73    6.81 
   5  -3  -2  111.30    6.55 
  -5   3  -2  113.66    6.93 
  -3  -5  -2  117.45    6.43 
   3   5  -2  111.53    6.32 
   3   5  -2  119.52    7.15 
  -3  -5  -2  121.11    6.95 
   5  -3  -2  117.64    6.65 
   3   5  -2  115.86    7.10 
  -5   3  -2  113.91    6.45 
  -3  -5  -2  111.38    6.46 
  -3  -5  -2  107.75    7.03 
  -5   3  -2  125.06    6.84 
   3   5   2   90.22    6.87 
  -3  -5   2   91.61    6.78 
   5  -3   2  105.70    6.79 
  -3  -5   2   97.80    6.27 
  -5   3   2  107.68    6.89 
   3   5   2   97.92    6.86 
  -5   3   2   96.34    6.56 
   5  -3   2   98.45    6.64 
  -5   3   2   89.26    6.79 
  -3  -5   2  106.91    6.90 
  -3  -5   2  101.12    6.87 
   5  -3   2   91.66    6.89 
   5  -3   2   99.36    6.38 
   5  -4  -2  127.89    7.98 
  -4  -5  -2  122.54    7.92 
  -5   4  -2  121.89    7.58 
  -4  -5  -2  116.53    7.92 
  -4  -5  -2  115.74    8.10 
   5  -4  -2  123.50    8.13 
   4   5  -2  116.66    7.52 
   5  -4  -2  122.25    7.71 
  -5   4  -2  145.59    8.07 
  -5   4  -2  127.43    7.93 
   4   5  -2  120.06    8.15 
   4   5  -2  128.50    7.95 
  -5   4  -2  116.86    8.04 
  -4  -5  -2  120.69    7.98 
   5  -4  -2  118.32    7.70 
  -4  -5  -2  122.49    7.66 
   4   5  -2  117.37    8.12 
   5  -4   2  138.05    7.62 
   5  -4   2  137.08    8.19 
   4   5   2  130.65    8.23 
  -5   4   2  126.86    7.77 
  -5   4   2  135.39    8.04 
   4   5   2  121.80    8.06 
  -5   4   2  141.42    7.92 
  -4  -5   2  135.18    8.12 
   5  -4   2  133.38    7.99 
   5  -4   2  132.62    7.98 
  -4  -5   2  126.22    8.02 
  -5   4   2  124.20    8.10 
  -4  -5   2  131.35    8.05 
  -5  -5  -2   72.00    4.80 
  -5  -5  -2   68.39    4.80 
  -5  -5  -2   72.48    4.58 
   5   5  -2   69.43    5.26 
   5  -5  -2   65.14    4.53 
  -5   5  -2   65.10    4.44 
   5   5  -2   70.91    4.50 
  -5   5  -2   67.41    4.70 
  -5   5  -2   64.40    5.07 
  -5  -5  -2   67.97    4.57 
   5  -5  -2   57.00    4.90 
   5  -5  -2   70.39    4.85 
  -5   5  -2   73.29    4.90 
  -5  -5  -2   67.82    5.07 
  -5  -5  -2   70.41    5.05 
   5  -5  -2   71.82    4.93 
  -5   5   2   63.20    4.98 
   5   5   2   63.10    5.07 
  -5  -5   2   63.26    4.86 
   5  -5   2   70.25    4.95 
   5  -5   2   67.92    4.44 
  -5   5   2   63.94    4.66 
   5   5   2   61.92    4.93 
  -5   5   2   74.15    4.84 
  -5  -5   2   68.30    4.50 
   5  -5   2   78.88    5.11 
   5  -5   2   64.99    4.71 
  -5   5   2   68.51    4.76 
  -5  -5   2   70.42    4.95 
  -5   6  -2   44.07    4.03 
   5  -6  -2   47.14    3.53 
  -6  -5  -2   45.77    3.61 
  -5   6  -2   47.54    3.88 
  -5   6  -2   47.94    3.67 
  -6  -5  -2   47.37    4.13 
   5  -6  -2   47.08    3.67 
   5  -6  -2   46.48    3.91 
   5  -6  -2   49.26    4.00 
  -6  -5  -2   48.79    3.58 
   6   5  -2   46.84    4.23 
  -6  -5  -2   47.93    4.08 
  -6  -5  -2   47.36    3.77 
   6   5  -2   45.91    3.72 
  -5   6  -2   41.62    3.50 
   6   5   2   47.96    4.18 
   5  -6   2   44.68    3.74 
  -6  -5   2   42.62    4.17 
  -6  -5   2   43.07    3.72 
  -5   6   2   47.60    3.70 
  -5   6   2   44.04    4.15 
  -6  -5   2   45.41    3.85 
   5  -6   2   47.48    4.05 
   5  -6   2   47.95    3.35 
  -6  -5   2   46.21    3.58 
  -6  -5   2   51.43    3.51 
  -5   6   2   40.89    3.79 
  -6  -5   2   46.64    3.81 
   6   5   2   43.97    4.01 
   5  -6   2   46.51    3.90 
  -5   6   2   44.19    3.62 
   6   4  -2  145.72    9.15 
   6   4  -2  134.61    9.36 
   4  -6  -2  139.38    9.08 
   4  -6  -2  145.05    9.16 
  -6  -4  -2  143.08    9.24 
   4  -6  -2  135.78    8.92 
  -4   6  -2  150.45    9.42 
   4  -6  -2  136.21    9.20 
  -4   6  -2  142.20    9.29 
  -4   6  -2  140.75    8.98 
  -6  -4  -2  143.92    9.16 
  -6  -4  -2  138.05    8.98 
  -6  -4  -2  150.30    9.18 
  -6  -4  -2  145.54    9.05 
  -4   6  -2  141.14    8.92 
  -6  -4   2  143.57    8.90 
   4  -6   2  147.83    9.14 
  -4   6   2  148.42    9.39 
  -4   6   2  149.62    9.19 
   6   4   2  149.98    9.24 
  -6  -4   2  158.10    9.59 
  -6  -4   2  142.50    9.29 
   6   4   2  153.40    9.30 
   4  -6   2  146.06    9.35 
   4  -6   2  151.59    8.87 
  -4   6   2  145.99    9.15 
  -6  -4   2  156.16    9.05 
  -4   6   2  163.57    9.10 
  -6  -4   2  148.65    9.29 
   4  -6   2  152.59    9.45 
  -3   6  -2   50.69    3.97 
   3  -6  -2   46.79    3.68 
  -3   6  -2   50.65    4.12 
   6   3  -2   49.88    4.11 
  -3   6  -2   51.99    3.52 
  -6  -3  -2   54.24    3.86 
   3  -6  -2   48.63    4.08 
   3  -6  -2   47.15    3.66 
  -6  -3  -2   50.96    4.02 
  -3   6  -2   51.87    3.89 
  -6  -3  -2   54.51    3.73 
  -6  -3  -2   47.58    3.76 
   6   3  -2   50.36    4.04 
  -6  -3  -2   54.68    3.89 
   3  -6  -2   51.66    3.57 
   6   3   2   51.41    4.05 
   3  -6   2   49.41    4.13 
  -6  -3   2   50.54    3.76 
  -3   6   2   53.29    3.95 
  -6  -3   2   51.83    3.58 
  -3   6   2   52.90    4.13 
  -3   6   2   55.11    3.63 
  -3   6   2   49.69    4.02 
  -6  -3   2   49.37    4.05 
   3  -6   2   53.04    3.59 
  -6  -3   2   55.99    3.98 
  -6  -3   2   58.68    3.60 
   3  -6   2   48.58    3.50 
  -6  -3   2   57.03    4.01 
  -2   6  -2    3.58    1.25 
  -6  -2  -2    4.99    0.95 
  -6  -2  -2    4.45    0.96 
  -6  -2  -2    5.25    1.40 
   2  -6  -2    3.61    1.40 
   2  -6  -2    4.12    0.78 
  -2   6  -2    3.79    1.23 
  -2   6  -2    3.38    0.96 
  -2   6  -2    4.38    0.73 
  -6  -2  -2    3.94    0.95 
   2  -6  -2    4.11    0.97 
   2  -6  -2    3.21    0.92 
   6   2  -2    4.25    1.28 
  -6  -2  -2    2.44    0.90 
  -6  -2   2    6.24    1.15 
   2  -6   2    4.87    1.46 
  -6  -2   2    6.24    1.13 
  -2   6   2    7.39    1.27 
   6   2   2    6.92    1.53 
  -6  -2   2    3.87    1.27 
  -2   6   2    6.60    1.47 
  -2   6   2    5.87    1.55 
  -6  -2   2    6.44    0.93 
  -6  -2   2    5.14    1.33 
   2  -6   2    5.52    0.88 
  -6  -2   2    6.60    0.98 
  -2   6   2    5.87    0.96 
  -6  -2   2    4.69    1.10 
   6   1  -2  105.89    7.06 
   6   1  -2  107.41    6.78 
   1  -6  -2  104.12    6.38 
   1  -6  -2  107.66    6.80 
  -1   6  -2   96.94    6.94 
  -1   6  -2  103.65    6.94 
  -6  -1  -2  101.68    6.85 
  -6  -1  -2  106.90    6.82 
  -1   6  -2  107.07    6.28 
   6   1  -2  100.39    6.39 
   1  -6  -2  103.10    7.10 
  -6  -1  -2  107.56    6.94 
   1  -6  -2  103.52    6.79 
  -6  -1  -2  107.12    6.68 
  -6  -1  -2  106.15    6.62 
  -6  -1  -2  107.83    6.60 
  -1   6  -2  100.31    6.89 
  -1   6   2  121.84    7.11 
   1  -6   2  122.06    6.84 
   6   1   2  118.99    7.19 
  -6  -1   2  106.47    6.85 
   6   1   2  108.53    6.63 
  -1   6   2  109.91    6.43 
  -1   6   2  106.76    7.01 
  -1   6   2  108.91    7.00 
   1  -6   2  122.12    6.96 
  -6  -1   2  109.06    6.39 
   1  -6   2  106.40    7.10 
  -6  -1   2  107.63    7.05 
  -6  -1   2  106.76    6.85 
  -6  -1   2  103.33    6.88 
   0  -6  -2    1.35    1.04 
   0   6  -2    0.55    1.00 
   0  -6  -2    0.99    0.42 
   0   6  -2    0.52    1.03 
   0  -6  -2    1.65    0.89 
  -6   0  -2    2.01    0.82 
   6   0  -2    1.29    1.04 
   6   0  -2    1.15    0.47 
  -6   0  -2    0.51    0.53 
   6   0  -2    1.38    0.70 
  -6   0  -2    0.54    0.56 
   0   6  -2    1.08    0.85 
  -6   0  -2    1.12    1.07 
   0  -6  -2    0.97    0.69 
   0   6   2    0.40    1.07 
   0  -6   2    1.61    0.74 
  -6   0   2    0.66    0.48 
  -6   0   2    1.17    1.05 
   0   6   2    2.06    0.46 
  -6   0   2    1.25    1.05 
   0   6   2    1.58    0.87 
   0  -6   2    1.67    0.82 
   6   0   2    0.42    1.04 
   6   0   2    0.75    0.60 
   6   0   2    0.20    0.51 
   0   6   2    1.67    1.11 
  -6   0   2    0.49    0.79 
   0  -6   2    0.61    1.16 
   1   6  -2  105.28    6.99 
   6  -1  -2  109.52    6.92 
  -1  -6  -2  109.66    6.23 
   6  -1  -2  116.77    6.39 
  -6   1  -2  112.73    6.66 
   6  -1  -2  104.43    7.09 
  -6   1  -2  106.28    6.48 
  -1  -6  -2  111.53    7.18 
   1   6  -2   98.55    7.02 
  -1  -6  -2  113.79    6.90 
   6  -1  -2  113.26    6.70 
  -1  -6  -2  109.64    6.83 
  -6   1  -2  112.61    7.03 
   1   6  -2  108.82    7.06 
  -6   1  -2  110.06    6.92 
   6  -1   2  108.14    6.84 
   1   6   2  108.15    7.01 
  -6   1   2  106.22    6.94 
   1   6   2   99.90    6.97 
   6  -1   2  107.01    6.59 
   6  -1   2  102.73    7.13 
  -1  -6   2   98.92    6.79 
   1   6   2  106.53    6.24 
  -6   1   2  104.35    7.02 
  -1  -6   2  111.06    7.13 
  -1  -6   2  108.61    6.88 
   1   6   2   94.29    6.91 
  -6   1   2  107.06    6.40 
  -6   2  -2    7.95    1.21 
   6  -2  -2    6.16    0.87 
  -2  -6  -2    8.10    1.34 
   2   6  -2    4.82    1.58 
  -2  -6  -2    5.43    1.48 
   6  -2  -2    6.95    1.07 
  -6   2  -2    5.37    1.27 
  -2  -6  -2    6.85    0.82 
  -2  -6  -2    5.14    0.73 
   6  -2  -2    4.95    1.44 
   6  -2  -2    6.39    1.08 
  -6   2  -2    7.24    1.32 
   2   6  -2    7.68    1.36 
  -2  -6  -2    5.95    1.16 
   2   6  -2    7.32    1.59 
  -6   2  -2    6.15    0.93 
   6  -2   2    4.29    0.87 
  -2  -6   2    2.60    1.32 
  -2  -6   2    2.49    0.98 
  -6   2   2    3.88    1.09 
   6  -2   2    2.93    1.45 
  -6   2   2    5.16    0.89 
   6  -2   2    3.56    0.96 
   2   6   2    5.06    1.38 
   2   6   2    4.32    1.51 
   2   6   2    3.54    1.04 
  -6   2   2    3.40    1.26 
  -2  -6   2    4.09    1.04 
  -6   3  -2   48.69    4.07 
  -6   3  -2   60.24    3.85 
   3   6  -2   53.20    4.25 
   6  -3  -2   56.57    3.66 
  -3  -6  -2   56.16    4.40 
  -6   3  -2   56.33    4.05 
  -3  -6  -2   54.44    3.42 
  -3  -6  -2   54.34    4.29 
  -6   3  -2   54.22    3.49 
   3   6  -2   56.36    4.09 
   6  -3  -2   56.59    3.57 
  -3  -6  -2   54.61    3.90 
   6  -3  -2   51.56    4.30 
  -3  -6  -2   57.18    3.38 
   3   6  -2   53.00    4.27 
  -6   3   2   48.20    3.83 
   3   6   2   47.11    4.23 
  -6   3   2   53.13    3.63 
   6  -3   2   50.93    3.45 
  -3  -6   2   50.06    3.20 
  -3  -6   2   52.19    3.19 
  -6   3   2   49.51    3.93 
   3   6   2   51.16    4.13 
   6  -3   2   50.41    4.28 
   6  -3   2   41.99    4.05 
   6  -3   2   49.42    3.85 
  -6   3   2   53.29    4.22 
  -3  -6   2   47.57    3.80 
  -3  -6   2   49.26    4.18 
   4   6  -2  143.53    9.40 
  -4  -6  -2  152.39    9.19 
  -4  -6  -2  152.16    8.67 
  -6   4  -2  138.45    9.08 
   4   6  -2  149.92    8.51 
  -4  -6  -2  151.57    8.63 
   6  -4  -2  148.28    8.79 
   4   6  -2  141.87    9.41 
  -4  -6  -2  144.12    9.03 
   6  -4  -2  143.43    9.12 
  -4  -6  -2  154.59    9.43 
  -6   4  -2  155.67    9.28 
  -6   4  -2  160.12    8.68 
  -6   4  -2  152.44    9.02 
   6  -4  -2  144.34    9.32 
   4   6  -2  141.61    9.08 
   6  -4  -2  151.56    8.84 
   6  -4   2  136.53    8.99 
  -6   4   2  144.10    8.92 
  -6   4   2  140.78    8.79 
   6  -4   2  123.08    9.18 
  -4  -6   2  137.98    9.11 
   4   6   2  135.73    9.26 
   6  -4   2  139.18    8.59 
   6  -4   2  142.52    9.00 
   4   6   2  141.38    9.26 
  -4  -6   2  144.86    8.47 
  -4  -6   2  136.41    9.12 
  -4  -6   2  143.92    9.19 
  -6   4   2  128.80    9.13 
  -6   5  -2   48.93    3.81 
   5   6  -2   42.72    3.22 
   6  -5  -2   41.02    4.04 
   6  -5  -2   44.68    3.72 
  -5  -6  -2   47.30    3.89 
  -5  -6  -2   48.76    3.82 
  -5  -6  -2   44.96    3.34 
   6  -5  -2   43.11    3.46 
  -5  -6  -2   44.53    4.09 
  -6   5  -2   47.76    4.21 
   5   6  -2   42.79    4.24 
   6  -5  -2   45.21    3.67 
  -5  -6  -2   42.79    3.36 
  -5  -6  -2   51.95    4.14 
   5   6  -2   46.05    4.26 
   6  -5   2   39.92    4.00 
   5   6   2   46.67    4.10 
   6  -5   2   46.55    3.68 
  -5  -6   2   49.33    4.07 
  -6   5   2   48.43    3.81 
   5   6   2   47.85    4.14 
  -5  -6   2   50.49    3.93 
  -5  -6   2   48.73    3.27 
  -6   5   2   48.50    4.19 
  -6   5   2   49.75    3.70 
   6  -5   2   47.87    3.95 
  -6   5   2   48.85    3.81 
  -5  -6   2   43.35    3.90 
   6  -5   2   48.24    3.29 
  -6  -6  -2   68.38    5.05 
  -6  -6  -2   62.34    4.86 
  -6   6  -2   68.18    5.08 
  -6  -6  -2   69.25    4.60 
   6  -6  -2   66.51    5.00 
  -6  -6  -2   61.27    4.86 
  -6   6  -2   66.48    5.38 
   6  -6  -2   58.03    5.10 
  -6   6  -2   65.17    4.79 
  -6   6  -2   60.52    4.74 
  -6  -6  -2   66.67    5.13 
  -6  -6  -2   69.63    5.34 
   6  -6  -2   62.63    4.94 
   6   6  -2   69.93    5.55 
   6   6   2   62.94    5.27 
  -6  -6   2   66.42    5.88 
   6   6   2   63.34    5.40 
  -6   6   2   67.99    4.87 
   6  -6   2   62.07    4.43 
  -6  -6   2   71.46    5.13 
  -6   6   2   70.33    4.98 
  -6  -6   2   58.23    5.01 
  -6   6   2   67.75    5.40 
   6  -6   2   72.52    5.26 
   6  -6   2   60.45    4.73 
  -6   6   2   62.00    4.90 
  -6  -6   2   72.91    4.54 
   6  -6   2   69.13    5.23 
  -6  -6   2   68.49    5.13 
   6  -7  -2    4.13    1.79 
  -6   7  -2    4.01    1.97 
   7   6  -2    6.80    1.62 
  -7  -6  -2    2.86    1.56 
  -7  -6  -2    3.24    1.62 
   7   6  -2    6.31    2.18 
   6  -7  -2    6.13    1.46 
  -6   7  -2    4.79    1.59 
  -6   7  -2    6.16    1.27 
  -7  -6  -2    8.84    1.87 
  -7  -6  -2    3.39    1.71 
  -7  -6  -2    2.21    1.46 
  -7  -6  -2    5.29    1.30 
  -6   7  -2    4.64    1.56 
   6  -7  -2    5.46    1.96 
   6  -7   2    6.99    1.96 
  -7  -6   2    5.11    1.86 
  -6   7   2    5.35    2.11 
  -6   7   2    6.66    1.99 
   7   6   2    7.43    2.00 
  -7  -6   2    5.25    2.07 
  -7  -6   2    6.51    1.35 
  -6   7   2    6.82    1.72 
  -6   7   2   11.96    2.03 
   6  -7   2    6.32    2.15 
   6  -7   2    7.95    1.39 
  -7  -6   2    7.97    1.58 
  -5   7  -2  148.27   10.11 
  -7  -5  -2  171.19   10.13 
  -7  -5  -2  163.04    9.87 
   5  -7  -2  156.32    9.72 
   5  -7  -2  161.68    9.99 
  -5   7  -2  166.31   10.14 
  -7  -5  -2  160.00   10.13 
   5  -7  -2  163.94   10.18 
   7   5  -2  165.45    9.97 
  -7  -5  -2  159.36   10.03 
   7   5  -2  164.35   10.34 
   5  -7  -2  156.39    9.98 
  -5   7  -2  162.68    9.85 
  -7  -5  -2  163.84    9.82 
  -7  -5   2  157.42    9.89 
  -7  -5   2  155.86   10.14 
   7   5   2  152.39   10.13 
   5  -7   2  143.85    9.81 
  -5   7   2  142.74    9.90 
   5  -7   2  152.85    9.53 
   5  -7   2  141.51    9.80 
  -7  -5   2  151.21   10.07 
  -5   7   2  147.73    9.72 
  -5   7   2  142.31    9.86 
  -7  -5   2  154.69   10.05 
  -7  -5   2  167.42    9.78 
  -7  -5   2  156.96    9.67 
   5  -7   2  152.96   10.15 
  -5   7   2  155.70   10.25 
  -4   7  -2    3.77    0.91 
  -4   7  -2    4.48    1.39 
  -7  -4  -2    2.40    1.43 
   4  -7  -2    4.03    1.71 
   4  -7  -2    3.29    1.22 
  -4   7  -2    3.86    1.56 
   7   4  -2    3.67    1.74 
   4  -7  -2    3.43    1.05 
  -7  -4  -2    3.23    1.22 
   7   4  -2    2.19    1.36 
  -7  -4  -2    5.84    1.27 
  -7  -4  -2    4.09    1.28 
   4  -7  -2    2.81    1.26 
  -4   7  -2    3.50    1.72 
  -7  -4  -2    2.80    1.27 
  -7  -4  -2    3.81    1.55 
   4  -7   2    7.83    1.56 
  -7  -4   2    7.86    1.84 
  -4   7   2    6.25    1.78 
  -4   7   2    6.02    1.38 
  -4   7   2    8.81    2.02 
   4  -7   2    6.52    1.27 
   4  -7   2    8.95    1.99 
  -7  -4   2    7.61    1.40 
   7   4   2    6.64    1.75 
  -7  -4   2    5.81    1.37 
  -7  -4   2    6.36    1.39 
   3  -7  -2   82.66    6.05 
   3  -7  -2   86.21    5.62 
  -7  -3  -2   83.62    5.99 
  -3   7  -2   87.75    6.31 
  -3   7  -2   83.98    6.14 
  -3   7  -2   81.55    5.95 
  -7  -3  -2   86.06    5.91 
   3  -7  -2   87.47    5.96 
   7   3  -2   86.71    6.24 
   3  -7  -2   79.20    6.26 
  -7  -3  -2   90.45    5.79 
  -3   7  -2   84.38    5.51 
  -7  -3  -2   89.12    6.04 
  -7  -3  -2   80.65    6.14 
  -7  -3   2   94.20    5.60 
   3  -7   2   86.34    5.98 
   3  -7   2   80.68    5.65 
  -3   7   2   90.72    6.09 
  -3   7   2   87.48    5.59 
  -3   7   2   82.52    6.17 
  -3   7   2   91.11    6.17 
  -7  -3   2   91.72    5.99 
   7   3   2   91.50    6.29 
  -7  -3   2   95.59    6.12 
   3  -7   2   87.44    6.30 
  -7  -3   2   88.20    6.12 
  -7  -3   2   95.29    5.69 
  -7  -3   2   94.69    6.09 
   3  -7   2   91.70    5.57 
   2  -7  -2    6.03    1.03 
  -2   7  -2    6.65    1.36 
  -7  -2  -2    5.62    1.41 
  -7  -2  -2    7.88    1.42 
  -7  -2  -2    7.19    1.58 
  -7  -2  -2    8.91    1.44 
   7   2  -2    3.71    1.59 
  -7  -2  -2    7.52    1.45 
   2  -7  -2    5.41    1.77 
  -2   7  -2    6.17    1.55 
  -2   7  -2    7.88    1.06 
  -2   7  -2    5.34    1.69 
  -7  -2   2    9.82    1.28 
   2  -7   2   12.56    1.77 
  -2   7   2   11.89    2.06 
   7   2   2    8.60    1.42 
   2  -7   2   11.55    1.53 
  -7  -2   2   10.74    1.37 
  -7  -2   2    9.72    1.81 
  -7  -2   2   10.51    1.71 
  -7  -2   2   11.17    1.64 
  -2   7   2    9.86    1.96 
  -7  -2   2    8.89    1.52 
  -2   7   2    8.36    1.52 
  -7  -2   2   13.60    1.94 
   2  -7   2    9.78    2.01 
  -1   7  -2    6.46    1.36 
  -1   7  -2    7.12    1.67 
   1  -7  -2    7.95    1.77 
  -7  -1  -2    5.86    1.25 
   1  -7  -2    5.48    0.90 
  -7  -1  -2    7.80    1.59 
  -1   7  -2    6.92    1.68 
  -7  -1  -2    6.81    1.31 
   7   1  -2    9.19    1.97 
   7   1  -2    7.86    1.27 
   1  -7   2    3.97    1.14 
   1  -7   2    2.91    1.59 
   1  -7   2    3.96    0.99 
   7   1   2    3.65    0.96 
  -7  -1   2    4.70    1.30 
  -1   7   2    3.54    1.47 
  -1   7   2    2.86    1.56 
  -1   7   2    3.79    1.19 
  -7  -1   2    4.19    0.81 
  -7  -1   2    5.28    1.60 
  -1   7   2    4.29    0.73 
  -7  -1   2    4.80    1.20 
   7   1   2    3.11    1.46 
   0  -7  -2   29.39    1.97 
   0   7  -2   31.68    2.96 
  -7   0  -2   27.43    2.64 
   0  -7  -2   33.17    3.38 
   7   0  -2   27.28    2.41 
   0  -7  -2   29.66    3.00 
  -7   0  -2   30.98    2.97 
  -7   0  -2   31.11    2.44 
   0  -7  -2   33.71    2.68 
   7   0  -2   30.04    2.12 
  -7   0  -2   26.93    2.24 
   0   7  -2   27.47    3.11 
   0   7  -2   27.83    3.12 
   7   0  -2   29.05    3.25 
  -7   0   2   29.87    2.77 
   0  -7   2   27.28    3.30 
  -7   0   2   29.51    2.17 
   0  -7   2   27.48    2.57 
   7   0   2   30.20    3.22 
  -7   0   2   26.41    2.78 
   0   7   2   29.74    1.98 
   7   0   2   29.18    2.36 
   0   7   2   31.13    2.81 
  -7   0   2   31.22    3.00 
   0  -7   2   28.33    2.67 
   0   7   2   29.46    3.23 
   0   7   2   29.21    3.04 
  -7   1  -2    3.21    1.29 
  -1  -7  -2    3.72    1.71 
  -7   1  -2    2.57    0.83 
  -1  -7  -2    4.09    1.21 
   7  -1  -2    4.21    0.89 
   1   7  -2    4.19    1.07 
  -7   1  -2    4.04    0.98 
   7  -1  -2    4.91    1.00 
  -1  -7  -2    3.60    1.05 
   1   7  -2    6.50    1.69 
   7  -1  -2    2.84    1.51 
   7  -1  -2    4.27    0.76 
   1   7  -2    4.65    1.55 
  -1  -7  -2    3.87    0.60 
  -7   1  -2    3.26    1.05 
  -1  -7   2    4.80    1.66 
  -7   1   2    7.47    1.66 
  -7   1   2    7.19    1.10 
   1   7   2    8.67    1.71 
  -7   1   2    7.13    1.50 
   7  -1   2    8.72    1.97 
   1   7   2    5.62    1.71 
  -1  -7   2    6.52    1.33 
   2   7  -2   11.15    2.13 
  -7   2  -2   12.16    1.67 
  -2  -7  -2    8.31    1.91 
   7  -2  -2   10.73    1.58 
  -7   2  -2   11.15    1.92 
  -2  -7  -2   12.87    1.00 
  -7   2  -2   11.02    1.42 
   7  -2  -2   12.18    1.25 
  -7   2  -2   11.15    1.98 
  -2  -7  -2   12.07    1.00 
   7  -2  -2   15.07    1.93 
   7  -2  -2   11.03    2.12 
   2   7  -2   12.39    1.89 
   2   7  -2    9.84    1.99 
  -2  -7  -2   12.90    1.81 
  -2  -7  -2   11.97    1.81 
  -2  -7   2    8.35    1.60 
  -3  -7  -2   94.27    5.33 
   7  -3  -2   90.31    5.69 
   3   7  -2   88.56    6.46 
  -7   3  -2   99.21    6.29 
  -7   3  -2   84.54    6.07 
  -7   3  -2   89.88    5.53 
  -7   3  -2   83.87    5.81 
  -3  -7  -2   89.17    6.10 
  -3  -7  -2   90.50    6.50 
  -3  -7  -2   98.66    6.49 
   7  -3  -2   96.08    5.56 
  -3  -7  -2   95.17    5.28 
   3   7  -2   89.19    6.15 
   7  -3  -2   89.53    5.98 
   3   7  -2   94.18    6.50 
   7  -3  -2   94.21    6.51 
   7  -3   2   78.40    6.36 
   7  -3   2   84.02    5.46 
   3   7   2   81.46    6.13 
  -7   3   2   86.14    6.14 
   7  -3   2   86.20    5.81 
   3   7   2   85.67    6.29 
  -3  -7   2   80.55    5.98 
   7  -3   2   87.02    5.92 
  -7   3   2   80.26    6.19 
  -7   3   2   79.62    5.54 
   3   7   2   82.33    6.34 
  -3  -7   2   83.61    6.33 
  -7   3   2   80.36    5.83 
  -3  -7   2   86.17    6.06 
   7  -4  -2    7.43    2.11 
  -4  -7  -2    6.91    1.52 
  -4  -7  -2    6.29    1.06 
  -4  -7  -2    7.41    1.92 
   4   7  -2    4.84    1.85 
   7  -4  -2    7.34    1.20 
  -7   4  -2    9.58    2.00 
   4   7  -2    5.27    1.51 
  -7   4  -2    7.03    1.45 
  -7   4  -2    6.36    1.49 
   4   7  -2    8.09    1.98 
   7  -4  -2    6.79    1.35 
   4   7   2    3.63    1.51 
  -4  -7   2    4.28    1.72 
  -7   4   2    5.21    1.19 
  -4  -7   2    1.16    1.16 
  -7   4   2    7.37    1.37 
  -4  -7   2    3.71    0.66 
   7  -4   2    4.60    0.88 
   7  -4   2    4.54    1.24 
  -7   4   2    2.82    1.44 
   4   7   2    3.47    1.71 
  -4  -7   2    3.19    0.64 
   7  -4   2    2.80    1.73 
  -4  -7   2    0.10    1.30 
   7  -4   2    2.49    1.22 
  -7   4   2    4.10    1.75 
   5   7  -2  150.94   10.31 
   7  -5  -2  144.91    9.86 
  -5  -7  -2  158.48   10.31 
   7  -5  -2  153.49    9.93 
  -5  -7  -2  141.22    9.85 
  -5  -7  -2  143.33    9.85 
  -5  -7  -2  153.30    9.38 
  -7   5  -2  145.31    9.49 
   7  -5  -2  169.23   10.35 
  -5  -7  -2  155.84    9.32 
  -5  -7  -2  158.40    9.92 
   7  -5  -2  161.12    9.71 
  -7   5  -2  157.82    9.92 
   5   7  -2  159.82   10.36 
  -7   5  -2  138.63   10.05 
  -7   5   2  165.11   10.20 
  -5  -7   2  151.66   10.02 
   7  -5   2  160.07    9.87 
   7  -5   2  164.74    9.42 
  -5  -7   2  158.16   10.09 
   5   7   2  166.87   10.40 
   7  -5   2  165.38   10.02 
  -7   5   2  163.97    9.99 
  -5  -7   2  163.41   10.08 
   7  -5   2  132.29   10.02 
  -5  -7   2  134.63    9.73 
   5   7   2  168.16   10.31 
  -7   5   2  163.54    9.67 
  -7   5   2  163.11    9.81 
  -6  -7  -2    7.00    2.07 
  -7   6  -2    7.61    2.18 
   6   7  -2    5.79    2.05 
  -6  -7  -2    6.38    1.71 
   7  -6  -2    6.29    1.32 
  -7   6  -2    7.70    1.65 
   7  -6  -2    9.65    2.34 
  -7   6  -2    5.60    1.62 
  -6  -7  -2    5.14    1.57 
  -6  -7  -2    6.08    1.77 
  -6  -7  -2    6.79    1.29 
  -7   6  -2    6.26    1.60 
   7  -6  -2    7.85    1.76 
   7  -6   2    6.77    1.23 
   7  -6   2    6.10    1.92 
  -6  -7   2    5.72    1.15 
  -6  -7   2    3.12    1.82 
   6   7   2    4.25    2.03 
  -7   6   2    4.35    1.76 
   6   7   2    3.68    2.03 
   7  -6   2    5.21    1.78 
  -7   6   2    4.34    1.57 
  -7   6   2    2.53    1.94 
   7   7  -2   94.80    6.87 
   7  -7  -2  110.33    7.36 
  -7  -7  -2  113.12    7.71 
  -7  -7  -2  102.35    7.06 
  -7  -7  -2   94.61    7.13 
  -7  -7  -2  106.33    6.78 
   7  -7  -2  101.41    6.84 
   7  -7  -2   92.98    7.47 
   7   7  -2  100.90    7.75 
  -7   7  -2   97.37    7.23 
  -7   7  -2  102.46    7.67 
  -7   7  -2  102.90    7.09 
  -7   7  -2   93.87    6.93 
   7  -7   2  105.96    7.53 
  -7   7   2  107.30    7.77 
  -7  -7   2  103.42    7.46 
   7   7   2  103.92    7.65 
  -7   7   2   99.77    7.09 
   7  -7   2  104.80    7.39 
   7   7   2  105.44    7.74 
  -7   7   2  102.38    7.11 
  -7  -7   2  104.24    6.70 
  -7   7   2  101.98    7.25 
  -7  -7   2  108.90    7.16 
   7  -8  -2    1.37    2.00 
  -7   8  -2    1.28    1.89 
  -8  -7  -2    1.61    2.21 
   8   7  -2   -0.75    1.53 
  -8  -7  -2    1.48    1.48 
   7  -8  -2    1.72    1.74 
   7  -8  -2    3.07    1.69 
  -7   8  -2    0.13    1.61 
  -7   8  -2    0.34    1.64 
  -8  -7  -2    1.42    1.81 
   8   7  -2    1.04    1.98 
  -8  -7   2    3.16    2.41 
  -7   8   2    0.61    1.92 
   8   7   2   -0.51    1.94 
   7  -8   2    0.15    1.91 
  -7   8   2    2.06    2.15 
  -8  -7   2    1.51    1.76 
  -8  -7   2    2.87    1.70 
  -7   8   2    0.47    1.56 
   7  -8   2    1.58    2.07 
  -7   8   2   -0.25    2.23 
   7  -8   2   -0.21    1.26 
   8   6  -2  122.39    8.90 
   6  -8  -2  113.49    8.53 
   6  -8  -2  126.28    9.12 
  -6   8  -2  125.72    9.29 
  -8  -6  -2  127.69    9.11 
   8   6  -2  124.00    9.29 
   6  -8  -2  121.13    8.97 
  -6   8  -2  123.19    8.77 
  -8  -6  -2  126.09    8.75 
  -6   8  -2  121.63    8.55 
  -8  -6  -2  120.99    8.60 
  -6   8   2  137.15    8.71 
  -8  -6   2  151.49    9.43 
   6  -8   2  132.91    8.43 
  -8  -6   2  143.43    8.75 
  -8  -6   2  146.28    8.71 
  -6   8   2  147.06    9.50 
  -6   8   2  141.55    9.08 
  -6   8   2  132.96    8.98 
   6  -8   2  158.90    9.16 
  -8  -6   2  141.13    8.99 
   8   6   2  147.58    9.35 
   6  -8   2  148.05    9.39 
  -8  -5  -2    4.53    1.90 
  -5   8  -2    6.31    2.19 
   5  -8  -2    4.77    1.48 
  -5   8  -2    8.54    1.33 
  -8  -5  -2    7.60    2.13 
   8   5  -2    7.17    2.26 
  -5   8  -2    7.29    1.92 
  -8  -5  -2    5.05    1.66 
  -8  -5  -2    5.79    1.61 
   5  -8  -2    7.59    1.96 
   5  -8  -2    4.71    1.99 
   8   5  -2    8.92    1.92 
  -8  -5  -2    5.48    1.96 
  -8  -5  -2    5.67    1.80 
  -5   8   2    8.54    2.35 
  -5   8   2    7.92    2.06 
  -5   8   2   11.22    1.82 
   5  -8   2    7.13    1.37 
  -8  -5   2    8.32    1.72 
   5  -8   2    6.43    1.73 
  -5   8   2    6.06    2.00 
   5  -8   2    7.36    2.06 
  -8  -5   2    5.76    1.33 
  -8  -5   2    7.99    1.85 
  -8  -5   2    6.49    2.06 
   4  -8  -2  164.81   10.56 
   8   4  -2  145.96   10.30 
  -4   8  -2  158.29   10.56 
  -8  -4  -2  137.49   10.08 
  -4   8  -2  138.01   10.20 
   4  -8  -2  145.26    9.91 
  -8  -4  -2  148.98   10.19 
  -8  -4  -2  161.93   10.37 
  -8  -4  -2  152.41   10.39 
   4  -8  -2  155.10    9.98 
  -8  -4  -2  154.07   10.20 
  -8  -4  -2  155.67   10.15 
  -4   8  -2  154.13   10.12 
  -4   8  -2  159.41    9.76 
  -8  -4  -2  153.09   10.19 
  -4   8   2  161.26   10.35 
  -8  -4   2  168.81   10.40 
  -8  -4   2  162.43    9.97 
   4  -8   2  159.14    9.90 
  -8  -4   2  165.32   10.39 
  -8  -4   2  181.30    9.88 
   4  -8   2  172.93    9.95 
   8   4   2  177.12   10.58 
   4  -8   2  167.97   10.63 
  -8  -4   2  166.22   10.40 
  -4   8   2  163.07   10.51 
  -4   8   2  175.65   10.46 
  -4   8   2  174.08    9.89 
  -8  -4   2  163.13   10.20 
   8   3  -2    3.28    1.79 
  -3   8  -2    3.63    1.79 
  -3   8  -2    4.18    0.94 
   3  -8  -2    4.66    1.22 
  -8  -3  -2    2.76    1.39 
   3  -8  -2    4.76    1.02 
  -3   8  -2    4.32    1.69 
   3  -8  -2    3.47    1.26 
  -3   8  -2    4.78    1.44 
  -8  -3  -2    4.44    1.67 
  -8  -3  -2    4.43    1.60 
  -8  -3  -2    3.24    1.33 
  -8  -3  -2    4.56    1.38 
   3  -8  -2    2.41    1.88 
  -8  -3  -2    5.24    1.28 
  -8  -3   2    6.29    1.41 
  -8  -3   2    5.52    1.13 
   3  -8   2    3.28    1.31 
  -3   8   2    5.98    1.86 
  -3   8   2    3.79    1.45 
   3  -8   2    6.27    2.10 
  -8  -3   2    7.52    1.48 
   3  -8   2    4.34    0.95 
  -3   8   2    5.34    1.05 
  -8  -3   2    1.64    1.52 
  -3   8   2    3.79    1.69 
   3  -8   2    4.20    1.16 
  -8  -3   2    3.85    1.90 
   8   3   2    2.40    1.82 
  -8  -3   2    3.65    1.65 
   2  -8  -2   19.07    2.35 
   2  -8  -2   21.67    3.23 
  -2   8  -2   20.90    3.12 
   8   2   2   12.83    2.37 
  -8  -2   2   16.01    2.31 
  -8  -2   2   14.85    2.33 
  -2   8   2   16.57    2.67 
   2  -8   2   11.54    2.01 
  -8  -2   2   15.17    2.56 
  -8  -2   2   12.05    2.06 
  -2   8   2   16.97    2.45 
  -8  -2   2   11.93    1.64 
  -2   8   2   12.71    2.35 
  -2   8   2   12.53    1.69 
   2  -8   2   12.70    1.96 
   8   2   2   11.15    1.87 
   2  -8   2   15.58    2.57 
  -8  -2   2   12.41    2.21 
  -8  -2   2   11.86    1.64 
  -8  -1  -2    7.02    1.17 
  -8  -1  -2    6.02    1.46 
  -1   8  -2    4.87    1.75 
  -8  -1  -2    7.29    1.75 
  -8  -1  -2    5.82    1.40 
  -1   8  -2    6.43    2.00 
  -8  -1  -2    7.06    1.46 
   1  -8  -2    5.77    1.41 
   1  -8  -2    7.75    1.02 
   8   1  -2    5.94    2.08 
  -8  -1  -2    6.84    1.46 
  -1   8  -2    5.47    0.70 
   1  -8  -2    4.74    1.20 
   1  -8  -2    4.63    1.84 
  -1   8  -2    5.20    1.51 
   8   1  -2    5.99    0.94 
  -1   8  -2    6.05    0.72 
   1  -8   2   11.84    1.86 
   8   1   2    8.75    2.12 
  -8  -1   2    6.86    1.91 
  -1   8   2    6.79    1.99 
  -8  -1   2    5.22    1.56 
  -1   8   2    7.69    1.97 
  -8  -1   2    6.32    1.12 
  -1   8   2    6.27    0.92 
   8   1   2    7.47    1.48 
   1  -8   2    6.32    1.99 
  -8  -1   2    7.78    1.70 
  -1   8   2    7.04    1.60 
  -8  -1   2    7.83    1.67 
   0  -8  -2    4.91    1.35 
   0   8  -2    2.78    1.69 
  -8   0  -2    4.57    1.71 
  -8   0  -2    4.68    1.23 
   8   0  -2    5.61    1.24 
   8   0  -2    3.26    1.86 
   0  -8  -2    3.62    1.27 
  -8   0  -2    4.24    1.39 
   0  -8  -2    1.83    1.73 
   0  -8  -2    3.88    0.67 
  -8   0  -2    3.78    1.00 
   0   8  -2    4.64    1.54 
   8   0  -2    4.15    0.78 
   0   8  -2    3.76    1.62 
   8   0   2    5.25    1.76 
   0  -8   2    5.39    1.24 
   0   8   2    5.69    1.44 
   0   8   2    3.55    0.57 
   0   8   2    3.84    1.87 
  -8   0   2    5.22    1.22 
  -8   0   2    3.30    1.44 
  -8   0   2    3.50    1.61 
   8   0   2    2.88    1.27 
   0  -8   2    1.63    1.85 
   0  -8   2    3.86    1.31 
  -8   0   2    4.01    1.40 
   0   8   2    3.90    1.62 
   8  -1  -2    6.30    1.04 
   1   8  -2    4.56    1.41 
   8  -1  -2    7.90    2.16 
   8  -1  -2    4.56    1.27 
  -8   1  -2    6.78    1.71 
  -8   1  -2    7.30    1.26 
   1   8  -2    5.47    1.87 
   8  -1  -2    6.91    1.29 
  -8   1  -2    8.21    1.50 
  -1  -8  -2    6.80    2.11 
  -8   1  -2    5.80    1.46 
  -1  -8  -2    6.59    1.37 
  -1  -8  -2    6.29    1.37 
   1   8  -2    6.44    2.00 
   8  -1   2    5.13    1.36 
  -1  -8   2    4.51    1.80 
  -8   1   2    5.73    1.74 
  -8   1   2    3.40    1.53 
   8  -1   2    5.93    1.97 
   1   8   2    6.20    2.05 
  -1  -8   2    6.86    1.42 
  -1  -8   2    7.53    1.46 
   8  -1   2    5.98    1.09 
  -8   1   2    7.47    1.61 
   8  -1   2    6.60    1.38 
   1   8   2    5.28    1.69 
   1   8   2    3.67    1.54 
   8  -2  -2   13.53    2.58 
   2   8  -2   10.31    1.98 
   8  -2  -2   13.25    2.02 
  -2  -8  -2   15.99    2.39 
  -8   2  -2   13.00    2.25 
   2   8  -2   11.29    2.33 
   2   8  -2   13.12    2.43 
  -8   2  -2   12.84    1.90 
  -8   2  -2   14.24    2.27 
  -2  -8  -2   13.41    2.55 
   8  -2  -2   11.27    1.82 
   8  -2  -2   12.08    1.47 
  -2  -8  -2   14.53    2.23 
  -8   2  -2   13.69    2.37 
  -8   2   2   18.75    2.32 
   2   8   2   19.55    2.65 
  -8   2   2   17.78    2.68 
   8  -2   2   20.69    2.91 
   2   8   2   17.81    2.78 
  -2  -8   2   22.30    3.19 
   8  -3  -2    5.03    1.05 
   8  -3  -2    3.93    1.87 
   3   8  -2    2.44    1.40 
  -3  -8  -2    4.47    0.63 
  -3  -8  -2    4.29    1.59 
   8  -3  -2    4.41    1.33 
  -3  -8  -2    3.13    1.32 
  -8   3  -2    4.91    1.34 
   8  -3  -2    5.15    0.90 
  -3  -8  -2    4.21    1.84 
  -8   3  -2    4.87    1.31 
   3   8  -2    5.51    1.91 
  -8   3  -2    3.47    1.72 
   3   8  -2    4.35    2.02 
  -3  -8  -2    6.07    0.79 
  -3  -8   2    3.80    1.34 
   8  -3   2    5.30    2.15 
  -8   3   2    4.70    1.51 
   3   8   2    3.10    1.54 
   8  -3   2    5.81    1.32 
   3   8   2    3.56    1.73 
  -8   3   2    4.39    1.63 
   8  -3   2    1.34    1.23 
  -8   3   2    4.55    1.03 
   8  -3   2    4.71    0.97 
  -3  -8   2    6.16    1.44 
  -8   3   2    0.78    1.44 
   3   8   2    1.15    1.59 
  -3  -8   2    2.06    1.84 
  -8   4  -2  166.05   10.36 
   8  -4  -2  195.60   11.29 
  -8   4  -2  159.52   10.59 
  -4  -8  -2  174.22   11.05 
  -4  -8  -2  170.80    9.74 
   4   8  -2  180.43   11.07 
  -4  -8  -2  166.80    9.66 
   4   8  -2  182.18   11.14 
  -8   4  -2  172.51   10.09 
  -8   4  -2  172.00   10.76 
  -4  -8  -2  158.39   10.45 
   8  -4  -2  168.18   10.11 
   4   8  -2  158.69   10.55 
  -4  -8   2  153.33    9.43 
  -4  -8   2  156.69   10.80 
  -4  -8   2  159.56    9.46 
  -8   4   2  185.16   10.79 
   8  -4   2  156.57   10.26 
  -8   4   2  155.07   10.72 
   8  -4   2  155.51    9.90 
  -8   4   2  158.04   10.30 
   4   8   2  152.53   10.80 
   8  -4   2  174.63   11.05 
   8  -4   2  181.25   11.20 
  -4  -8   2  145.69   10.55 
   4   8   2  165.57   10.84 
  -8   4   2  161.52   10.10 
  -5  -8  -2    7.66    1.20 
  -5  -8  -2    9.46    1.92 
  -8   5  -2    7.78    1.70 
   8  -5  -2    6.76    1.68 
   5   8  -2    8.70    2.19 
   8  -5  -2    4.43    2.07 
  -8   5  -2    6.26    1.57 
   5   8  -2    6.79    2.60 
  -8   5  -2    3.55    2.01 
   8  -5  -2    5.23    1.40 
  -5  -8  -2   10.25    1.40 
  -5  -8  -2    6.12    2.11 
  -8   5   2    7.57    1.93 
   5   8   2    6.56    2.27 
  -8   5   2    6.36    1.55 
  -5  -8   2    5.63    0.97 
   8  -5   2    5.71    1.15 
  -5  -8   2    6.41    2.00 
   5   8   2    5.11    2.14 
   8  -5   2    5.92    2.10 
   8  -5   2    5.93    1.69 
  -5  -8   2    8.52    1.22 
  -8   5   2    5.40    2.16 
  -6  -8  -2  149.67    8.39 
  -8   6  -2  149.75    8.71 
  -6  -8  -2  140.43    9.56 
   8  -6  -2  155.92    9.67 
  -8   6  -2  145.01    9.04 
   8  -6  -2  145.81    8.66 
   8  -6  -2  144.30    8.89 
   6   8  -2  143.96    9.59 
  -8   6  -2  143.99    9.60 
   6   8  -2  137.55    9.54 
  -8   6   2  116.06    8.76 
   8  -6   2  117.70    9.23 
   8  -6   2  123.57    8.32 
   8  -6   2  124.62    8.93 
  -6  -8   2  124.30    8.21 
  -8   6   2  129.42    8.73 
   6   8   2  128.24    9.55 
  -8   6   2  126.11    9.26 
   6   8   2  126.03    9.34 
  -6  -8   2  134.45    9.30 
  -6  -8   2  127.72    8.18 
  -7  -8  -2    0.84    1.28 
  -7  -8  -2    2.58    2.25 
   8  -7  -2   -0.53    1.32 
  -8   7  -2    0.12    2.14 
   8  -7  -2    0.51    1.82 
  -8   7  -2   -0.29    1.54 
  -7  -8  -2    1.14    1.48 
   7   8  -2    2.05    2.28 
   8  -7  -2    3.68    2.21 
  -8   7   2    0.93    1.89 
   8  -7   2    1.83    1.83 
   7   8   2    1.19    2.39 
   8  -7   2    1.24    1.14 
   8  -7   2    0.37    2.05 
   7   8   2    2.54    2.13 
  -8   7   2    0.12    1.70 
  -7  -8   2   -0.94    1.90 
  -7  -8   2    1.30    1.17 
  -8   7   2    0.45    2.18 
  -8  -8  -2  186.13   11.83 
   8  -8  -2  198.55   12.47 
  -8   8  -2  184.71   12.02 
   8  -8  -2  207.63   12.85 
  -8  -8  -2  183.06   12.75 
  -8   8  -2  185.09   12.83 
  -8  -8  -2  199.98   12.16 
   8   8  -2  193.94   13.03 
  -8  -8   2  185.38   11.78 
  -8  -8   2  195.80   13.03 
   8  -8   2  194.77   12.56 
  -8   8   2  194.51   12.91 
   8  -8   2  171.69   12.49 
   8   8   2  200.27   12.77 
  -8  -8   2  202.42   12.63 
  -8   8   2  203.27   12.37 
   8  -8   2  176.67   11.69 
   9   8  -2   -0.04    2.29 
   8  -9  -2    0.88    2.01 
  -9  -8  -2    1.34    2.09 
   8  -9  -2   -0.91    2.31 
  -8   9  -2    0.44    2.23 
  -9  -8  -2    0.85    2.50 
  -9  -8  -2    1.69    1.86 
  -8   9  -2    3.97    2.72 
  -9  -8   2    0.64    1.92 
   8  -9   2    2.49    2.40 
  -8   9   2   -2.27    2.08 
  -8   9   2   -0.05    2.42 
   8  -9   2   -1.62    1.62 
   9   8   2   -0.65    2.38 
   8  -9   2    0.44    2.20 
  -9  -8   2    1.78    2.54 
  -9  -8   2    1.70    2.32 
  -9  -7  -2  135.60   10.05 
  -9  -7  -2  142.95    9.79 
   7  -9  -2  153.36   10.05 
  -7   9  -2  151.51    9.68 
   7  -9  -2  151.67   10.10 
  -7   9  -2  136.55    9.46 
  -9  -7  -2  143.00    9.53 
  -9  -7  -2  138.95   10.11 
   9   7  -2  148.80   10.47 
  -7   9  -2  149.46   10.46 
   9   7  -2  140.34    9.78 
   9   7   2  144.99   10.11 
  -9  -7   2  140.29   10.16 
  -9  -7   2  144.70    9.46 
   7  -9   2  152.41    9.98 
   7  -9   2  130.61    9.09 
  -7   9   2  151.76   10.38 
  -7   9   2  144.26    9.81 
   7  -9   2  137.78   10.15 
  -9  -7   2  153.32    9.87 
  -9  -7   2  132.91    9.47 
  -9  -6  -2    4.50    1.78 
   9   6  -2    2.71    2.06 
   6  -9  -2    1.42    1.94 
  -9  -6  -2   -0.25    1.72 
  -6   9  -2    3.20    1.45 
  -9  -6  -2    4.52    2.20 
  -9  -6  -2    0.57    1.93 
   6  -9  -2    3.97    2.09 
  -6   9  -2    1.49    2.02 
  -6   9  -2    1.85    2.33 
  -9  -6   2    2.66    1.67 
  -9  -6   2    0.68    2.19 
   6  -9   2    4.03    1.95 
  -6   9   2    3.94    2.14 
   6  -9   2   -0.21    1.36 
  -9  -6   2    1.27    1.75 
  -6   9   2   -0.65    1.95 
  -9  -6   2    2.98    1.78 
   6  -9   2    0.93    2.21 
  -6   9   2    6.20    1.60 
  -9  -5  -2  186.57   11.27 
   5  -9  -2  178.87   11.29 
  -9  -5  -2  174.55   11.30 
  -9  -5  -2  176.76   11.55 
   9   5  -2  187.98   11.63 
  -9  -5  -2  181.91   11.76 
  -5   9  -2  168.30   11.43 
  -9  -5  -2  178.25   11.58 
  -5   9  -2  180.55   11.88 
   5  -9  -2  185.66   11.90 
  -5   9  -2  185.63   11.03 
   5  -9   2  162.01   10.95 
  -9  -5   2  175.35   11.65 
  -5   9   2  177.19   11.94 
   5  -9   2  183.27   11.91 
  -9  -5   2  174.25   11.27 
  -9  -5   2  181.22   11.31 
   5  -9   2  178.45   11.20 
  -5   9   2  174.74   11.60 
  -9  -4  -2   -0.53    1.48 
   4  -9  -2    1.63    2.05 
   9   4  -2    1.68    1.85 
  -4   9  -2    2.54    1.01 
  -9  -4  -2    3.57    1.80 
  -4   9  -2    1.27    2.00 
  -9  -4  -2    0.81    1.56 
  -4   9  -2    4.45    1.87 
   4  -9  -2    3.20    1.50 
  -9  -4  -2   -0.97    1.64 
  -9  -4  -2    3.42    1.34 
  -9  -4  -2    5.04    1.98 
  -9  -4   2    2.35    1.35 
   4  -9   2    0.69    1.74 
  -4   9   2    2.26    1.87 
   4  -9   2    1.20    1.34 
   4  -9   2    0.48    1.28 
  -9  -4   2    2.13    1.18 
  -4   9   2    2.05    2.02 
  -9  -4   2    4.03    2.07 
   9   4   2    1.78    1.85 
  -9  -4   2    2.19    2.07 
  -9  -4   2    2.55    1.62 
  -4   9   2    0.19    1.06 
   9   3  -2   79.75    6.53 
  -9  -3  -2   68.28    5.87 
  -9  -3  -2   84.07    5.63 
   3  -9  -2   73.45    5.43 
  -3   9  -2   76.63    6.18 
   3  -9  -2   77.92    6.53 
  -3   9  -2   74.85    6.31 
  -9  -3  -2   74.87    5.95 
  -3   9  -2   81.07    5.24 
  -9  -3  -2   76.76    5.94 
   3  -9  -2   87.36    6.39 
  -9  -3  -2   78.56    6.23 
  -9  -3  -2   78.73    5.99 
  -9  -3   2   88.34    5.43 
  -9  -3   2   89.91    6.71 
  -9  -3   2   82.57    6.18 
  -3   9   2   89.57    6.65 
   3  -9   2   85.34    6.71 
  -3   9   2   85.23    5.41 
  -9  -3   2   84.96    6.24 
  -9  -3   2   83.96    5.71 
  -9  -3   2   87.01    6.27 
   3  -9   2   82.88    5.29 
   3  -9   2   81.65    5.68 
   9   3   2   87.27    6.68 
  -3   9   2   95.68    6.54 
  -9  -2  -2   -0.15    1.38 
  -9  -2  -2    1.36    1.55 
   2  -9  -2    1.09    1.91 
  -2   9  -2    0.10    1.70 
  -2   9  -2   -1.40    1.69 
   9   2  -2    1.40    1.69 
  -2   9  -2    0.61    0.62 
  -9  -2  -2   -0.22    1.43 
  -9  -2  -2    2.22    1.46 
  -9  -2  -2    1.15    0.99 
   2  -9  -2    0.81    0.69 
  -9  -2  -2   -0.14    1.66 
   2  -9  -2    0.84    1.40 
  -2   9   2    0.46    0.80 
  -9  -2   2    0.11    1.54 
  -2   9   2   -0.44    1.61 
  -9  -2   2   -0.30    0.77 
   9   2   2    1.35    1.84 
   2  -9   2   -0.52    1.24 
  -2   9   2   -1.75    1.54 
  -9  -2   2   -1.06    1.47 
  -9  -2   2    2.77    1.89 
  -9  -2   2    1.82    1.60 
   2  -9   2    2.00    1.72 
  -9  -2   2    2.01    0.87 
   9   2   2    0.84    1.24 
   1  -9  -2    2.23    0.64 
  -1   9  -2    1.69    1.89 
   9   1  -2    2.94    2.08 
   1  -9  -2   -0.88    1.42 
  -9  -1  -2    2.50    1.05 
  -9  -1  -2    0.54    1.60 
   1  -9  -2    2.62    1.67 
   1  -9  -2    1.38    1.91 
  -1   9  -2    2.85    1.74 
  -9  -1  -2    2.52    1.52 
  -9  -1  -2    6.17    1.52 
  -9  -1  -2    3.64    1.36 
   9   1   2    5.44    2.11 
  -9  -1   2    4.51    0.96 
  -9  -1   2    2.68    1.68 
   9   1   2    4.07    1.32 
   1  -9   2    4.57    1.43 
  -1   9   2    3.51    1.77 
  -9  -1   2    3.40    1.68 
  -1   9   2    3.60    0.76 
  -1   9   2    3.52    2.03 
   1  -9   2    5.66    2.04 
  -9   0  -2    3.43    1.15 
   9   0  -2    3.57    2.00 
  -9   0  -2    1.73    1.66 
   0  -9  -2    2.49    1.75 
   0   9  -2    1.16    1.86 
   9   0  -2    3.22    1.19 
   0  -9  -2    1.98    0.44 
   9   0  -2    2.66    0.71 
  -9   0  -2    1.97    1.23 
   0  -9  -2    5.00    1.48 
   0   9  -2    0.86    1.80 
  -9   0   2    2.78    0.95 
   0   9   2    2.14    0.45 
   0   9   2    0.86    1.60 
   0  -9   2    1.59    1.94 
   0   9   2    3.23    2.00 
   9   0   2    3.32    1.32 
  -9   0   2    0.70    1.63 
  -9   0   2    2.95    1.50 
   0  -9   2    0.32    1.39 
   9   0   2    1.51    1.79 
   9  -1  -2    4.29    0.82 
  -9   1  -2    4.01    1.76 
  -9   1  -2    3.02    1.15 
  -1  -9  -2    4.27    2.00 
  -1  -9  -2    0.76    1.37 
   1   9  -2    3.06    2.12 
   9  -1  -2    3.08    1.13 
  -9   1  -2    6.61    1.54 
   9  -1  -2    5.33    2.19 
   1   9  -2    5.66    2.07 
  -1  -9   2    2.36    2.36 
  -9   1   2    2.30    1.86 
  -9   1   2    4.83    1.07 
  -1  -9   2    5.58    2.08 
   9  -1   2    2.65    1.27 
   1   9   2    1.99    1.91 
   9  -1   2    2.98    1.80 
   9  -1   2    0.47    0.93 
   1   9   2    2.64    1.79 
  -9   1   2    3.30    1.62 
   9  -1   2   -0.13    1.29 
  -9   2  -2   -0.38    1.56 
  -9   2  -2    0.21    1.28 
   2   9  -2   -0.43    1.75 
   9  -2  -2    0.83    0.67 
   2   9  -2    1.79    1.81 
  -2  -9  -2    1.29    1.74 
   9  -2  -2    0.71    2.02 
   9  -2  -2    2.59    1.22 
  -2  -9  -2   -1.90    1.43 
  -9   2  -2   -0.28    1.09 
  -2  -9   2   -0.11    1.72 
   2   9   2    0.42    1.79 
   9  -2   2    1.57    0.85 
   9  -2   2    0.30    1.70 
   2   9   2   -0.63    1.60 
   9  -2   2    0.98    1.21 
  -9   2   2    1.02    1.01 
  -9   2   2    1.49    1.50 
  -9   2   2    1.55    1.65 
  -9   3  -2   84.63    5.71 
  -9   3  -2   81.88    6.33 
  -3  -9  -2   89.51    6.91 
   3   9  -2   85.78    6.75 
  -9   3  -2   88.01    5.84 
  -3  -9  -2   99.49    7.51 
   9  -3  -2   88.77    5.73 
   3   9  -2   74.76    6.51 
   9  -3  -2  100.85    7.09 
   9  -3   2   79.02    6.57 
   9  -3   2   78.95    5.79 
  -3  -9   2   73.23    6.56 
  -9   3   2   74.89    5.92 
   9  -3   2   84.03    5.48 
  -9   3   2   82.52    5.53 
   3   9   2   76.87    6.63 
   3   9   2   79.38    6.55 
  -9   3   2   79.60    6.29 
  -9   4  -2    2.88    1.42 
   9  -4  -2    3.57    2.33 
  -9   4  -2    3.14    1.51 
  -4  -9  -2    2.86    0.68 
  -4  -9  -2    2.86    2.04 
   4   9  -2    4.66    2.16 
   9  -4  -2    3.41    1.27 
   9  -4  -2    0.89    1.13 
  -9   4  -2    2.22    1.97 
   4   9  -2    5.96    2.23 
  -4  -9  -2    1.47    0.60 
  -9   4   2    2.64    2.01 
   9  -4   2    2.66    1.46 
   4   9   2    3.85    2.08 
  -9   4   2    3.22    1.75 
   9  -4   2    1.40    2.01 
   4   9   2    2.19    1.96 
  -4  -9   2    3.30    2.14 
  -9   4   2    4.57    1.35 
  -5  -9  -2  185.46   11.96 
   5   9  -2  167.07   11.91 
  -9   5  -2  176.05   11.22 
  -9   5  -2  168.38   11.65 
  -5  -9  -2  176.12   10.43 
   9  -5  -2  167.24   10.87 
  -9   5  -2  167.04   10.82 
  -5  -9  -2  169.51   10.34 
   9  -5  -2  182.58   12.05 
   5   9  -2  161.55   11.81 
   9  -5  -2  173.40   10.92 
   9  -5   2  183.96   10.73 
  -9   5   2  177.90   10.98 
  -9   5   2  175.81   11.77 
   9  -5   2  172.40   11.87 
   5   9   2  192.80   12.00 
   5   9   2  181.86   12.08 
  -9   5   2  188.01   11.25 
   9  -5   2  180.57   11.22 
  -5  -9   2  179.83   10.15 
  -5  -9   2  180.24   11.86 
  -5  -9   2  179.02   10.17 
  -9   6  -2    1.68    1.55 
  -6  -9  -2    3.27    0.97 
  -6  -9  -2   -1.07    2.31 
   9  -6  -2    4.93    1.47 
   9  -6  -2    3.57    2.66 
   9  -6  -2    1.89    1.56 
   6   9  -2    2.89    2.55 
  -9   6  -2    1.32    1.95 
   6   9  -2    5.64    2.55 
  -9   6  -2    4.32    2.38 
  -6  -9  -2    2.05    0.99 
  -6  -9   2    2.36    0.91 
   9  -6   2    2.08    1.86 
   6   9   2    2.70    2.48 
  -9   6   2    2.50    1.93 
   9  -6   2    2.53    2.31 
  -9   6   2    1.77    1.60 
   6   9   2    1.29    2.08 
  -6  -9   2    4.19    2.45 
  -9   6   2    3.31    2.45 
   7   9  -2  153.15   10.85 
  -9   7  -2  141.28   10.49 
  -7  -9  -2  151.49   10.60 
   9  -7  -2  150.42   10.61 
  -9   7  -2  147.12    9.50 
   9  -7  -2  152.86    9.78 
  -7  -9  -2  141.61    9.35 
  -7  -9  -2  148.29    9.11 
  -7  -9   2  146.24   10.40 
  -9   7   2  155.85   10.67 
  -7  -9   2  149.08    9.03 
   7   9   2  152.98   10.53 
  -9   7   2  133.92    9.69 
  -9   7   2  129.00    9.68 
   9  -7   2  154.80   10.06 
   7   9   2  142.57   10.51 
   9  -7   2  138.83   10.41 
   9  -7   2  150.66    9.24 
   9  -8  -2    1.80    1.90 
  -9   8  -2   -0.79    1.80 
  -8  -9  -2    1.12    2.57 
  -8  -9  -2    1.65    1.84 
   8   9  -2   -0.77    2.31 
  -8  -9  -2   -0.17    1.82 
  -9   8  -2   -1.38    2.48 
   9  -8  -2   -1.00    2.73 
  -8  -9   2    4.85    1.62 
  -8  -9   2    1.34    1.73 
  -8  -9   2    1.57    2.50 
   9  -8   2    0.74    2.42 
   8   9   2   -1.02    2.46 
  -9   8   2    0.54    2.38 
   9  -8   2   -0.73    1.57 
   9  -8   2    2.38    2.25 
  -9   8   2    0.08    2.89 
  -9  -9  -2  202.77   12.82 
  -9  -9  -2  203.12   13.89 
   9  -9  -2  206.92   13.48 
   9   9  -2  184.00   13.90 
   9  -9  -2  204.55   13.85 
  -9   9  -2  192.25   13.94 
  -9  -9  -2  213.57   13.14 
  -9   9  -2  203.86   13.09 
   9  -9   2  217.20   13.90 
  -9  -9   2  204.21   13.63 
  -9  -9   2  197.09   12.90 
  -9   9   2  208.39   14.09 
   9   9   2  206.53   13.85 
  -9  -9   2  209.32   12.72 
   9  -9   2  192.94   13.46 
  -9   9   2  218.01   13.44 
  -9  -9   2  202.94   13.87 
  10   9  -2    2.85    3.59 
 -10  -9  -2    1.16    3.05 
  -9  10  -2    0.36    3.04 
 -10  -9  -2    0.14    2.51 
   9 -10  -2    0.91    2.70 
  -9  10  -2    4.44    2.73 
 -10  -9  -2   -0.17    3.49 
   9 -10  -2   -2.00    2.89 
 -10  -9   2    2.14    2.59 
  -9  10   2    4.70    3.15 
  10   9   2    2.77    2.73 
  -9  10   2    2.84    2.88 
   9 -10   2    0.30    2.97 
 -10  -9   2   -0.21    2.50 
   9 -10   2    1.00    2.79 
  -8  10  -2  148.60   10.34 
   8 -10  -2  145.67   10.58 
 -10  -8  -2  149.45   10.45 
  10   8  -2  159.35   11.20 
   8 -10  -2  138.87   10.56 
 -10  -8  -2  139.21   10.81 
  -8  10  -2  152.59   11.11 
 -10  -8  -2  159.23   10.86 
   8 -10   2  138.39   10.48 
 -10  -8   2  143.11   10.36 
 -10  -8   2  145.12   10.80 
  -8  10   2  148.40   10.36 
   8 -10   2  152.54   10.79 
  -8  10   2  141.57   10.95 
 -10  -7  -2    2.69    2.38 
   7 -10  -2    2.48    2.59 
  -7  10  -2    3.29    2.31 
 -10  -7  -2    2.65    2.31 
  -7  10  -2    2.42    2.81 
   7 -10  -2    4.33    2.36 
  10   7  -2    2.88    2.35 
 -10  -7  -2    3.20    2.67 
   7 -10   2    1.11    2.29 
  -7  10   2    0.90    2.67 
  -7  10   2    1.02    2.48 
 -10  -7   2   -1.24    2.34 
   7 -10   2    3.29    2.72 
 -10  -7   2    3.62    2.30 
  -6  10  -2   89.11    7.86 
  -6  10  -2  103.22    6.77 
   6 -10  -2  111.44    7.37 
 -10  -6  -2   99.60    7.48 
  -6  10  -2   98.39    7.31 
 -10  -6  -2   97.38    7.46 
   6 -10  -2   94.30    7.77 
  10   6  -2   94.53    7.53 
 -10  -6  -2   95.36    7.68 
   6 -10   2   94.29    7.92 
   6 -10   2   92.87    7.09 
 -10  -6   2   91.41    7.15 
 -10  -6   2   95.84    7.62 
  -6  10   2   89.72    7.55 
  -6  10   2  101.78    8.09 
  -6  10   2   81.30    6.58 
 -10  -6   2   89.70    6.73 
  -5  10  -2    5.99    1.42 
   5 -10  -2    1.63    2.30 
 -10  -5  -2    4.94    2.15 
 -10  -5  -2    4.04    2.41 
  10   5  -2    7.19    2.36 
 -10  -5  -2    1.52    1.75 
  -5  10  -2    4.92    2.16 
  -5  10  -2    3.76    2.61 
 -10  -5  -2    2.41    1.99 
   5 -10  -2    2.78    1.81 
 -10  -5   2    2.33    2.53 
 -10  -5   2    0.64    2.12 
  -5  10   2    6.33    2.39 
   5 -10   2    0.61    1.72 
  -5  10   2    1.43    2.33 
 -10  -5   2   -1.27    1.79 
 -10  -5   2   -1.87    1.52 
   5 -10   2   -1.32    2.15 
  -5  10   2   -1.17    1.40 
  10   4  -2   99.21    7.34 
 -10  -4  -2   91.06    7.29 
   4 -10  -2   93.76    6.37 
   4 -10  -2   93.34    7.51 
 -10  -4  -2   91.33    6.97 
 -10  -4  -2   82.60    6.36 
  -4  10  -2   85.89    7.05 
  -4  10  -2   85.05    7.39 
  -4  10  -2   89.29    5.98 
 -10  -4  -2   93.46    6.92 
   4 -10   2   91.56    7.52 
  10   4   2   90.73    7.29 
  -4  10   2   94.13    6.09 
 -10  -4   2   87.59    6.16 
 -10  -4   2   96.87    7.40 
  -4  10   2   93.53    7.49 
 -10  -4   2   88.98    7.09 
 -10  -4   2   92.53    6.48 
  -4  10   2   87.11    7.16 
   4 -10   2   91.71    6.31 
 -10  -3  -2   13.14    2.60 
   3 -10  -2   11.57    2.75 
   3 -10  -2   12.35    2.08 
  10   3  -2   12.73    2.88 
  -3  10  -2   12.63    2.69 
  -3  10  -2   10.81    1.37 
 -10  -3  -2   12.48    1.96 
  -3  10  -2   16.21    3.12 
 -10  -3  -2   14.86    2.62 
 -10  -3  -2   12.95    2.12 
 -10  -3   2    6.60    2.27 
  10   3   2    9.95    2.95 
  -3  10   2    9.66    2.50 
 -10  -3   2   12.41    1.73 
 -10  -3   2   11.37    2.76 
  -3  10   2   12.62    1.83 
 -10  -3   2   10.48    1.89 
   3 -10   2   11.40    2.91 
  -3  10   2   10.94    2.74 
  -2  10  -2   62.08    5.40 
 -10  -2  -2   51.81    5.05 
  -2  10  -2   52.59    3.38 
 -10  -2  -2   44.24    4.60 
  -2  10  -2   52.45    3.42 
   2 -10  -2   49.95    5.50 
  -2  10  -2   59.04    5.33 
  10   2  -2   46.25    5.35 
 -10  -2  -2   48.78    4.60 
 -10  -2  -2   48.16    4.66 
   2 -10  -2   47.36    3.60 
 -10  -2   2   57.55    3.94 
 -10  -2   2   63.82    5.43 
 -10  -2   2   57.89    5.00 
  -2  10   2   52.91    5.40 
  -2  10   2   63.45    5.54 
  10   2   2   58.23    5.32 
 -10  -2   2   57.90    4.31 
   2 -10   2   58.49    5.39 
  10   2   2   53.36    4.55 
 -10  -1  -2   11.59    1.98 
   1 -10  -2   12.39    2.95 
  10   1  -2   11.80    2.87 
  -1  10  -2   11.89    2.65 
 -10  -1  -2   12.63    2.69 
  -1  10  -2   13.38    2.78 
 -10  -1  -2   10.93    1.76 
 -10  -1   2    5.61    1.31 
  -1  10   2    5.77    2.36 
 -10  -1   2    6.13    2.32 
 -10  -1   2    6.06    1.98 
   1 -10   2    5.19    2.30 
  -1  10   2    5.94    0.97 
  10   1   2    6.71    2.68 
  -1  10   2    4.37    2.31 
  10   1   2    5.00    1.76 
   0  10  -2   15.31    2.85 
 -10   0  -2   11.87    1.86 
  10   0  -2   11.18    2.71 
 -10   0  -2   13.65    2.10 
   0  10  -2    9.30    2.48 
 -10   0  -2   10.72    1.83 
  10   0  -2    8.07    1.87 
 -10   0  -2   10.21    2.37 
   0 -10  -2   11.36    2.81 
  10   0  -2   11.30    1.52 
 -10   0   2    8.92    2.16 
 -10   0   2    9.10    2.52 
  10   0   2    9.10    1.88 
   0  10   2   11.17    2.93 
  10   0   2   11.17    2.88 
   0  10   2    8.70    2.29 
 -10   0   2   13.07    1.89 
   0 -10   2   10.87    3.02 
  10  -1  -2    7.44    1.19 
   1  10  -2    5.01    2.55 
 -10   1  -2    6.91    1.78 
 -10   1  -2    7.73    1.60 
  -1 -10  -2    2.19    2.19 
  10  -1  -2    4.79    2.55 
  10  -1  -2    7.95    1.59 
 -10   1  -2    5.79    2.23 
   1  10  -2    5.98    2.48 
  -1 -10   2   14.81    3.06 
  10  -1   2   11.19    1.92 
   1  10   2   11.69    2.97 
 -10   1   2   11.80    1.58 
 -10   1   2   12.84    2.75 
 -10   1   2   12.55    2.28 
  10  -1   2   12.49    2.92 
   1  10   2   13.55    2.64 
 -10   2  -2   57.65    5.33 
  10  -2  -2   65.21    4.47 
  10  -2  -2   68.73    4.26 
   2  10  -2   58.76    5.58 
 -10   2  -2   58.88    4.54 
  -2 -10  -2   65.84    5.94 
   2  10  -2   57.76    5.42 
  10  -2  -2   59.79    5.92 
 -10   2  -2   55.04    4.51 
  10  -2   2   55.08    4.13 
 -10   2   2   53.09    4.82 
  -2 -10   2   46.05    5.49 
   2  10   2   51.31    5.29 
 -10   2   2   51.27    5.37 
  10  -2   2   49.77    4.49 
 -10   2   2   54.48    4.14 
   2  10   2   53.73    5.45 
  10  -2   2   48.38    5.58 
  -3 -10  -2   10.77    2.85 
   3  10  -2   11.12    2.80 
  10  -3  -2   10.33    2.73 
  10  -3  -2    8.03    1.71 
 -10   3  -2   10.30    2.06 
 -10   3  -2    7.42    2.51 
  10  -3  -2   10.08    1.77 
   3  10  -2    9.02    2.74 
 -10   3  -2   12.44    2.02 
  10  -3   2   12.58    1.74 
 -10   3   2   15.69    2.69 
 -10   3   2   13.09    1.91 
  10  -3   2   13.09    2.13 
 -10   3   2   14.18    2.95 
   3  10   2   13.07    2.87 
   3  10   2   14.76    3.17 
  -3 -10   2   12.92    3.07 
  10  -3   2   12.87    3.06 
  10  -4  -2   98.75    7.92 
  -4 -10  -2   91.93    7.77 
 -10   4  -2   95.67    6.71 
   4  10  -2   94.33    7.70 
  10  -4  -2   92.66    6.25 
  10  -4  -2   89.63    6.28 
 -10   4  -2   92.54    7.41 
   4  10  -2   93.28    7.57 
 -10   4  -2   89.72    6.37 
  10  -4   2   88.80    7.70 
 -10   4   2   89.20    6.36 
 -10   4   2   91.87    7.40 
  -4 -10   2   99.82    7.67 
 -10   4   2   89.63    6.72 
  10  -4   2   87.33    6.57 
   4  10   2   94.13    7.48 
   4  10   2   91.79    7.65 
  10  -4   2   84.72    6.04 
 -10   5  -2   -1.53    2.20 
  10  -5  -2    3.08    2.64 
  10  -5  -2    0.50    1.43 
   5  10  -2    0.46    2.23 
   5  10  -2    1.60    2.60 
  -5 -10  -2    1.71    0.71 
  -5 -10  -2   -1.26    2.34 
  10  -5  -2    0.36    1.42 
  -5 -10  -2    1.06    0.72 
 -10   5  -2    0.73    1.92 
 -10   5  -2    0.40    1.59 
 -10   5   2    5.65    2.48 
  10  -5   2    3.75    1.45 
   5  10   2    4.28    2.76 
  10  -5   2    3.43    2.58 
  -5 -10   2    5.07    2.80 
   5  10   2    3.83    2.65 
 -10   5   2    6.41    2.15 
  10  -5   2    2.67    1.83 
 -10   6  -2  103.86    8.00 
  10  -6  -2  103.07    7.17 
   6  10  -2  102.00    8.47 
 -10   6  -2  108.39    7.07 
  10  -6  -2   92.96    8.35 
  -6 -10  -2   88.79    8.20 
   6  10  -2   89.45    8.16 
  -6 -10  -2  104.27    6.30 
  10  -6   2  101.65    7.33 
   6  10   2  105.12    8.22 
 -10   6   2   96.89    7.15 
  -6 -10   2   89.91    8.09 
 -10   6   2  102.31    7.35 
  -6 -10   2   99.27    5.93 
 -10   6   2   98.99    8.13 
   6  10   2   94.53    7.99 
  -6 -10   2   97.74    5.96 
  10  -6   2  102.07    8.24 
  10  -6   2  103.07    6.64 
  10  -7  -2   -0.39    2.02 
  -7 -10  -2    0.76    2.70 
 -10   7  -2    0.13    2.51 
   7  10  -2   -1.41    2.73 
  10  -7  -2   -0.25    2.85 
  -7 -10  -2    1.06    2.73 
  -7 -10  -2    1.59    1.36 
 -10   7  -2    1.69    2.04 
 -10   7   2   -2.62    2.07 
   7  10   2    0.64    2.74 
  10  -7   2    1.80    2.39 
 -10   7   2    4.53    2.67 
 -10   7   2    0.73    2.29 
  10  -7   2    1.59    1.59 
  -7 -10   2    2.18    1.10 
  -7 -10   2    3.32    2.92 
  10  -7   2    3.07    2.13 
   7  10   2    1.40    2.91 
  -7 -10   2    2.14    1.17 
  10  -8  -2  149.73   11.00 
  -8 -10  -2  133.63   10.80 
  -8 -10  -2  146.87    9.51 
 -10   8  -2  149.50   10.91 
  -8 -10  -2  132.11    9.17 
 -10   8  -2  138.37    9.69 
   8  10  -2  134.81   11.10 
  10  -8  -2  146.82   10.01 
  10  -8   2  152.42   10.99 
 -10   8   2  139.53    9.96 
  -8 -10   2  149.46   10.71 
  -8 -10   2  146.20    9.25 
 -10   8   2  139.30   10.71 
  10  -8   2  140.49   10.08 
  -8 -10   2  143.21    9.36 
   8  10   2  141.95   10.76 
  10  -8   2  146.56    9.20 
  -9 -10  -2    6.81    3.25 
 -10   9  -2   -2.96    2.97 
  -9 -10  -2   -0.81    2.15 
  10  -9  -2    2.69    2.42 
   9  10  -2    7.45    3.95 
  10  -9  -2   -4.44    3.02 
 -10   9  -2    0.66    2.27 
  10  -9   2    4.34    2.62 
  10  -9   2    2.34    2.77 
 -10   9   2    0.67    3.27 
  -9 -10   2    4.16    2.27 
  -9 -10   2    1.72    3.45 
   9  10   2    4.53    3.05 
 -10   9   2   -0.97    2.71 
  -9 -10   2    5.41    3.26 
  10  10  -2   70.82    7.89 
 -10  10  -2   88.78    8.53 
  10 -10  -2   81.34    8.07 
 -10 -10  -2   83.20    7.87 
  10 -10  -2   73.40    7.34 
 -10  10  -2   90.04    7.26 
 -10 -10  -2   71.95    6.96 
 -10 -10  -2   80.59    8.60 
 -10 -10   2   69.44    8.05 
  10 -10   2   74.80    7.85 
  10 -10   2   80.94    7.81 
 -10 -10   2   80.56    8.01 
 -10 -10   2   81.12    6.91 
 -10  10   2   70.40    8.25 
 -10  10   2   82.99    7.44 
 -11 -10  -2    3.65    4.39 
  10 -11  -2    2.85    3.66 
 -10  11  -2   -0.07    3.60 
 -11 -10  -2    0.66    3.36 
 -11 -10  -2    5.07    3.99 
  11  10  -2    4.04    3.62 
 -10  11  -2    4.37    3.39 
  10 -11  -2    1.03    3.17 
  10 -11   2   -0.23    3.54 
 -10  11   2   -6.41    3.56 
 -11 -10   2    4.18    3.51 
 -11 -10   2   -0.95    3.46 
 -11 -10   2    3.86    3.23 
 -10  11   2    1.80    3.40 
 -11  -9  -2   59.14    7.65 
  -9  11  -2   71.62    7.12 
   9 -11  -2   70.73    7.56 
   9 -11  -2   66.10    7.49 
 -11  -9  -2   74.59    7.31 
  -9  11  -2   56.57    7.87 
 -11  -9  -2   68.05    7.62 
  -9  11   2   68.92    7.49 
  -9  11   2   71.46    7.87 
 -11  -9   2   72.60    7.30 
   9 -11   2   69.35    7.61 
   9 -11   2   85.37    7.66 
 -11  -9   2   79.26    7.58 
 -11  -9   2   80.76    7.90 
 -11  -8  -2    1.31    2.84 
 -11  -8  -2    1.78    2.72 
  -8  11  -2    0.33    2.61 
   8 -11  -2    3.92    2.83 
  -8  11  -2    0.67    2.99 
   8 -11  -2    3.97    3.03 
 -11  -8  -2    0.52    2.76 
  -8  11   2   -1.40    3.26 
   8 -11   2    1.26    2.94 
  -8  11   2    1.23    2.90 
 -11  -8   2    4.02    2.73 
   8 -11   2    0.05    2.72 
   7 -11  -2   51.15    5.97 
 -11  -7  -2   47.47    5.96 
  -7  11  -2   46.43    5.75 
  11   7  -2   47.55    5.99 
 -11  -7  -2   55.07    6.44 
 -11  -7  -2   44.50    5.95 
   7 -11  -2   44.61    5.41 
 -11  -7  -2   55.47    6.05 
 -11  -7   2   59.03    6.34 
   7 -11   2   57.03    6.57 
   7 -11   2   54.93    5.67 
 -11  -7   2   62.54    5.73 
  -7  11   2   53.07    8.96 
  -7  11   2   66.39    6.27 
   6 -11  -2    0.75    2.11 
 -11  -6  -2   -0.40    2.38 
   6 -11  -2   -0.89    2.72 
  11   6  -2   -2.95    2.50 
 -11  -6  -2   -0.94    2.41 
 -11  -6  -2    3.51    2.98 
  -6  11  -2    0.94    1.82 
  -6  11  -2   -0.02    2.67 
  -6  11  -2    0.53    2.27 
  -6  11   2    1.52    2.79 
   6 -11   2    3.51    2.22 
  -6  11   2    1.52    2.75 
   6 -11   2    3.94    2.90 
 -11  -6   2    1.70    2.13 
 -11  -6   2    0.77    2.79 
 -11  -6   2   -0.70    2.47 
  -6  11   2    0.22    1.85 
 -11  -6   2    2.61    2.18 
  11   5  -2   57.39    6.32 
  -5  11  -2   57.90    6.36 
 -11  -5  -2   58.06    5.77 
   5 -11  -2   55.65    6.15 
  -5  11  -2   55.10    5.87 
   5 -11  -2   60.37    5.30 
 -11  -5  -2   60.46    5.63 
 -11  -5  -2   57.36    6.27 
  -5  11  -2   54.67    4.50 
  -5  11   2   70.77    6.28 
 -11  -5   2   60.02    6.14 
 -11  -5   2   61.29    5.46 
 -11  -5   2   61.93    4.97 
  -5  11   2   64.02    6.57 
   5 -11   2   65.62    6.51 
 -11  -5   2   69.36    6.57 
  -5  11   2   57.33    4.76 
 -11  -4  -2   10.51    2.10 
  -4  11  -2   13.23    3.33 
   4 -11  -2    8.99    3.03 
 -11  -4  -2   13.12    2.54 
   4 -11  -2   10.19    2.09 
  11   4  -2    9.49    2.95 
  -4  11  -2    6.09    1.37 
 -11  -4  -2    6.43    2.56 
 -11  -4  -2   11.72    2.83 
  -4  11  -2   10.27    2.97 
   4 -11   2    6.76    2.86 
 -11  -4   2    7.63    2.13 
  11   4   2    5.43    2.79 
  -4  11   2    5.96    2.74 
 -11  -4   2    9.28    2.78 
  -4  11   2    4.37    1.37 
 -11  -4   2    4.54    2.61 
 -11  -4   2    7.76    2.04 
  -4  11   2   10.15    3.05 
   3 -11  -2   31.15    4.88 
   3 -11  -2   27.79    2.60 
 -11  -3  -2   28.87    4.11 
 -11  -3  -2   25.08    3.88 
  -3  11  -2   28.17    4.68 
  -3  11  -2   41.28    4.86 
  -3  11  -2   28.41    2.28 
 -11  -3  -2   33.62    3.51 
  -3  11  -2   20.58    3.11 
  11   3  -2   27.31    4.63 
  -3  11   2   32.62    4.87 
  -3  11   2   31.55    4.71 
 -11  -3   2   31.34    3.52 
  11   3   2   32.78    4.95 
  -3  11   2   27.51    2.61 
   3 -11   2   39.83    5.08 
 -11  -3   2   30.07    4.30 
 -11  -3   2   28.90    3.02 
 -11  -3   2   33.97    4.66 
   2 -11  -2   27.86    4.22 
 -11  -2  -2   22.95    3.19 
 -11  -2  -2   27.30    3.72 
   2 -11  -2   30.01    2.21 
 -11  -2  -2   26.41    3.92 
  -2  11  -2   28.15    4.61 
 -11  -2  -2   25.13    4.14 
  -2  11  -2   23.93    3.86 
  11   2  -2   28.26    4.30 
  11   2   2   20.94    3.98 
  11   2   2   23.24    3.46 
  -2  11   2   24.40    2.15 
 -11  -2   2   27.66    3.63 
 -11  -2   2   28.56    3.23 
 -11  -2   2   30.31    2.77 
 -11  -2   2   29.06    4.40 
  -2  11   2   24.44    4.11 
   2 -11   2   29.99    4.37 
  -2  11   2   29.48    4.32 
  -1  11  -2   -0.91    2.20 
 -11  -1  -2   -1.71    1.85 
 -11  -1  -2    0.39    1.61 
 -11  -1  -2    1.52    1.48 
  11   1  -2   -1.29    2.31 
  -1  11  -2    0.86    2.39 
 -11  -1  -2    1.04    2.01 
   1 -11  -2    0.58    2.31 
  -1  11   2    4.17    2.62 
 -11  -1   2    0.16    2.30 
  11   1   2   -0.01    1.58 
  11   1   2    3.10    2.66 
   1 -11   2   -0.18    2.42 
  -1  11   2   -0.53    2.40 
 -11  -1   2    1.29    2.02 
 -11  -1   2   -0.43    1.17 
 -11   0  -2   40.89    5.11 
   0  11  -2   38.89    5.02 
 -11   0  -2   38.68    4.11 
  11   0  -2   37.11    3.77 
  11   0  -2   34.34    5.27 
   0  11  -2   37.10    4.92 
 -11   0  -2   38.37    3.88 
   0 -11  -2   38.32    5.45 
 -11   0  -2   33.47    4.55 
   0  11   2   37.16    4.76 
   0  11   2   35.34    4.83 
 -11   0   2   35.00    4.13 
  11   0   2   46.10    4.01 
   0 -11   2   33.62    5.15 
  11   0   2   43.51    5.38 
 -11   0   2   34.51    3.22 
 -11   0   2   37.74    4.74 
  11  -1  -2   -0.24    2.30 
 -11   1  -2    0.04    2.12 
   1  11  -2    1.47    2.46 
   1  11  -2   -0.68    2.18 
 -11   1  -2    2.19    1.57 
 -11   1  -2    1.85    1.66 
  11  -1  -2    3.00    1.80 
  -1 -11  -2    0.85    2.34 
 -11   1   2    0.69    1.16 
   1  11   2    0.83    2.10 
 -11   1   2    1.92    1.82 
  -1 -11   2   -0.04    2.51 
   1  11   2   -0.73    2.29 
  11  -1   2    0.02    2.35 
  11  -1   2    1.01    1.67 
 -11   1   2    1.35    2.18 
   2  11  -2   28.22    4.37 
  -2 -11  -2   23.32    4.03 
  11  -2  -2   24.09    3.11 
  11  -2  -2   26.59    4.70 
 -11   2  -2   27.58    3.51 
 -11   2  -2   30.87    3.44 
 -11   2  -2   24.86    4.20 
   2  11  -2   26.20    4.08 
  11  -2  -2   30.45    2.99 
   2  11   2   38.96    5.00 
  11  -2   2   29.02    3.48 
  -2 -11   2   31.45    5.05 
  11  -2   2   21.90    3.93 
   2  11   2   29.82    4.83 
 -11   2   2   28.16    3.00 
 -11   2   2   32.31    4.54 
  11  -2   2   23.47    3.04 
 -11   2   2   25.67    3.90 
  11  -3  -2   33.17    3.27 
  11  -3  -2   32.67    5.40 
 -11   3  -2   24.58    3.72 
  11  -3  -2   31.41    3.23 
   3  11  -2   32.12    5.00 
   3  11  -2   30.40    4.53 
  -3 -11  -2   36.45    5.46 
 -11   3  -2   32.53    4.67 
 -11   3  -2   31.33    3.62 
  11  -3   2   32.93    3.78 
  11  -3   2   30.58    3.08 
  11  -3   2   30.11    5.16 
  -3 -11   2   33.92    4.64 
   3  11   2   25.36    4.11 
 -11   3   2   28.61    4.06 
   3  11   2   30.79    4.59 
 -11   3   2   31.48    3.27 
 -11   3   2   32.71    4.74 
   4  11  -2   10.06    2.82 
 -11   4  -2    8.52    2.12 
  -4 -11  -2    6.77    3.12 
  11  -4  -2    9.01    3.16 
 -11   4  -2    5.94    2.28 
   4  11  -2    5.75    2.82 
 -11   4  -2    5.21    2.59 
  11  -4  -2    8.10    1.82 
  -4 -11   2    6.55    3.11 
 -11   4   2   12.32    2.14 
 -11   4   2   10.25    3.10 
 -11   4   2   12.65    2.63 
  11  -4   2    8.17    2.27 
   4  11   2    8.03    3.08 
   4  11   2    9.09    3.14 
  11  -4   2    8.90    1.63 
  11  -4   2   13.35    3.53 
   5  11  -2   61.12    6.63 
 -11   5  -2   65.35    5.22 
 -11   5  -2   65.22    5.69 
  11  -5  -2   60.98    7.01 
   5  11  -2   59.00    6.63 
 -11   5  -2   60.80    6.54 
  11  -5  -2   60.86    4.94 
  -5 -11  -2   71.01    6.85 
 -11   5   2   60.73    5.56 
  11  -5   2   61.98    6.59 
   5  11   2   54.40    6.28 
   5  11   2   59.43    6.75 
  11  -5   2   51.24    4.55 
  11  -5   2   61.32    5.37 
 -11   5   2   66.60    6.49 
 -11   5   2   51.75    4.95 
  -5 -11   2   66.78    6.72 
   6  11  -2    2.46    2.93 
   6  11  -2    4.30    3.20 
  -6 -11  -2    3.01    0.85 
 -11   6  -2    4.04    3.16 
  -6 -11  -2    2.07    2.89 
 -11   6  -2    1.44    2.06 
  11  -6  -2    0.14    3.13 
  -6 -11  -2    2.43    0.83 
  11  -6  -2    4.59    2.05 
  11  -6   2    1.42    2.88 
  11  -6   2   -0.85    1.91 
 -11   6   2   -1.77    2.08 
  11  -6   2    1.49    1.60 
 -11   6   2    1.79    2.26 
 -11   6   2   -0.55    2.77 
  -6 -11   2    1.42    2.69 
   6  11   2   -1.35    2.80 
   6  11   2    5.03    2.96 
 -11   7  -2   56.92    7.00 
  -7 -11  -2   59.43    6.74 
   7  11  -2   68.19    7.23 
  11  -7  -2   53.39    7.01 
  11  -7  -2   56.11    5.29 
 -11   7  -2   59.00    5.29 
  -7 -11  -2   55.36    4.01 
  11  -7   2   54.33    6.69 
  11  -7   2   51.44    5.61 
  -7 -11   2   43.90    6.71 
   7  11   2   55.41    7.89 
 -11   7   2   46.31    5.75 
   7  11   2   61.64    6.67 
  -8 -11  -2   -0.06    3.07 
 -11   8  -2   -0.68    2.48 
 -11   8  -2    6.62    3.87 
   8  11  -2   -0.30    5.67 
  11  -8  -2    0.93    3.46 
  -8 -11  -2    0.10    1.97 
  11  -8  -2    4.30    2.35 
  11  -8   2    2.97    2.71 
 -11   8   2    0.51    2.60 
  11  -8   2    2.56    3.26 
   8  11   2    6.22    3.49 
  -8 -11   2    1.90    3.32 
 -11   8   2   -2.89    3.03 
  -8 -11   2    0.07    1.15 
   8  11   2    6.36    3.91 
 -11   9  -2   70.95    6.81 
  -9 -11  -2   73.34    6.28 
  11  -9  -2   76.39    6.77 
 -11   9  -2   72.89    8.01 
   9  11  -2   70.28    8.07 
  11  -9  -2   73.14    9.22 
  -9 -11   2   69.24    8.32 
   9  11   2   66.35    8.64 
  -9 -11   2   61.94    5.73 
 -11   9   2   69.15    6.98 
  11  -9   2   59.77    7.57 
  -9 -11   2   69.02    7.95 
 -11   9   2   80.69    8.42 
  11  -9   2   65.38    7.01 
  10  11  -2   -2.07    3.89 
 -11  10  -2   -3.33    3.07 
  11 -10  -2    1.48    3.87 
  11 -10  -2    1.10    3.11 
 -10 -11  -2    7.58    4.25 
 -11  10  -2   -0.08    4.05 
 -10 -11  -2    2.24    3.03 
 -10 -11  -2   -0.65    3.57 
 -10 -11   2    3.23    3.97 
 -11  10   2   -1.01    3.05 
 -11  10   2   -0.74    4.20 
  11 -10   2   -0.96    6.15 
  10  11   2   -3.91    3.36 
 -10 -11   2    0.28    4.00 
  11 -10   2   -0.58    3.04 
 -11 -11  -2   34.55    6.22 
 -11 -11  -2   24.90    5.40 
  11  11  -2   23.82    5.26 
  11 -11  -2   27.15    5.39 
 -11  11  -2   31.30    4.85 
  11 -11  -2   27.32    4.83 
 -11  11  -2   28.27    5.79 
 -11 -11   2   32.46    5.58 
  11 -11   2   25.49    4.67 
  11  11   2   22.65    5.13 
 -11  11   2   29.22    5.74 
  11 -11   2   27.03    5.58 
 -11 -11   2   22.97    5.16 
 -11  11   2   23.12    5.14 
  10 -12  -2   35.09    5.20 
 -12 -10  -2   37.79    5.58 
 -10  12  -2   49.14    6.75 
 -12 -10  -2   40.31    6.11 
 -10  12  -2   38.01    6.29 
  10 -12  -2   39.47    6.92 
 -12 -10  -2   49.46    7.82 
 -12 -10   2   30.50    5.60 
  10 -12   2   24.94    5.18 
 -10  12   2   34.97    7.91 
 -12 -10   2   31.98    5.61 
 -12 -10   2   30.09    5.28 
 -10  12   2   28.24    5.99 
  10 -12   2   29.14    5.60 
 -12  -9  -2    2.98    3.49 
 -12  -9  -2    1.92    3.52 
  -9  12  -2   -0.64    3.45 
   9 -12  -2    1.08    4.19 
   9 -12  -2    5.11    3.65 
 -12  -9  -2   -1.21    3.71 
  -9  12  -2   -0.64    3.83 
 -12  -9  -2   -8.08    3.54 
 -12  -9   2   -1.33    3.53 
  -9  12   2   -0.66    3.54 
   9 -12   2   -3.67    3.71 
 -12  -9   2    0.84    3.93 
   9 -12   2   -0.61    3.21 
  -9  12   2    0.75    3.98 
 -12  -9   2   -2.16    3.30 
  -8  12  -2   56.37    6.98 
   8 -12  -2   63.78    7.14 
 -12  -8  -2   53.84    7.07 
 -12  -8  -2   52.82    7.01 
  -8  12  -2   59.99    7.93 
 -12  -8  -2   53.22    6.99 
   8 -12  -2   61.60    6.96 
 -12  -8  -2   50.58    7.22 
  -8  12   2   63.40    7.52 
 -12  -8   2   69.33    6.98 
  -8  12   2   66.87    7.31 
 -12  -8   2   61.81    7.54 
   8 -12   2   70.11    7.42 
 -12  -8   2   57.37    7.55 
  -7  12  -2   -0.60    3.55 
 -12  -7  -2    3.41    3.13 
   7 -12  -2    2.16    3.10 
 -12  -7  -2    0.28    3.17 
 -12  -7  -2    2.99    3.43 
   7 -12  -2    0.82    2.71 
 -12  -7  -2    1.73    3.13 
  12   7  -2   -2.46    2.86 
  -7  12  -2    0.64    3.12 
 -12  -7   2    3.12    2.88 
  -7  12   2    0.74    2.98 
  -7  12   2    4.55    3.62 
 -12  -7   2   -1.43    3.18 
 -12  -6  -2   27.50    4.72 
   6 -12  -2   29.30    4.51 
  -6  12  -2   26.13    4.98 
   6 -12  -2   34.24    4.76 
  12   6  -2   22.77    4.34 
  -6  12  -2   35.45    5.46 
 -12  -6  -2   32.38    4.65 
 -12  -6  -2   34.88    5.25 
  -6  12   2   34.67    4.97 
 -12  -6   2   31.49    4.92 
 -12  -6   2   35.66    5.68 
   6 -12   2   31.85    4.96 
  -6  12   2   32.84    5.27 
 -12  -6   2   24.04    3.90 
 -12  -5  -2   34.10    5.42 
 -12  -5  -2   43.81    5.39 
  -5  12  -2   41.20    8.09 
 -12  -5  -2   37.10    5.02 
   5 -12  -2   38.16    5.62 
   5 -12  -2   38.15    4.49 
  12   5  -2   45.14    6.39 
  -5  12  -2   38.92    5.93 
 -12  -5   2   42.46    5.74 
 -12  -5   2   39.54    4.88 
 -12  -5   2   31.75    4.15 
 -12  -5   2   42.54    5.72 
  -5  12   2   40.97    5.93 
   5 -12   2   44.47    6.06 
  -5  12   2   38.28    5.69 
   4 -12  -2   21.21    3.93 
  -4  12  -2   25.53    4.30 
  12   4  -2   26.46    4.31 
 -12  -4  -2   20.00    3.50 
   4 -12  -2   22.15    3.40 
  -4  12  -2   21.99    4.16 
 -12  -4  -2   22.72    3.89 
 -12  -4  -2   20.82    3.48 
 -12  -4  -2   25.24    3.66 
 -12  -4   2   19.05    3.67 
  -4  12   2   19.31    4.17 
  -4  12   2   18.03    4.08 
   4 -12   2   19.87    4.01 
 -12  -4   2   14.36    3.86 
 -12  -4   2   22.98    3.27 
 -12  -4   2   20.02    2.96 
  12   4   2   12.25    3.58 
  -4  12   2   18.15    2.93 
   3 -12  -2   17.66    2.11 
 -12  -3  -2   18.16    3.38 
   3 -12  -2   18.20    3.88 
  -3  12  -2   17.82    1.77 
  -3  12  -2   17.51    3.72 
  12   3  -2   17.28    3.56 
  -3  12  -2   19.81    3.86 
 -12  -3  -2   21.40    3.48 
 -12  -3  -2   20.12    3.26 
   3 -12   2   15.24    3.53 
 -12  -3   2   19.46    2.42 
  12   3   2   19.53    4.05 
 -12  -3   2   16.50    2.60 
  -3  12   2   18.03    3.88 
  -3  12   2   20.68    4.09 
  -3  12   2   14.85    2.19 
 -12  -3   2   20.56    3.60 
 -12  -3   2   18.09    3.61 
 -12  -2  -2    2.40    2.56 
 -12  -2  -2    3.24    2.25 
  -2  12  -2    3.19    3.03 
   2 -12  -2    0.79    2.75 
  12   2  -2    0.23    3.03 
 -12  -2  -2    5.49    1.94 
  -2  12  -2    2.99    2.97 
  -2  12   2    4.45    3.02 
 -12  -2   2    3.67    1.59 
 -12  -2   2    5.19    2.75 
   2 -12   2    1.02    2.83 
 -12  -2   2    5.21    2.53 
  -2  12   2    4.48    2.96 
  -2  12   2    3.32    0.81 
 -12  -2   2    3.94    1.82 
  12   2   2    7.32    3.30 
 -12  -1  -2   92.47    6.91 
 -12  -1  -2   86.69    7.51 
  12   1  -2   99.71    8.27 
   1 -12  -2   90.55    8.26 
  -1  12  -2   97.38    7.86 
  -1  12  -2   78.52    7.96 
 -12  -1  -2   89.39    6.59 
 -12  -1   2   93.02    7.45 
 -12  -1   2   92.88    7.19 
  12   1   2   92.24    8.35 
   1 -12   2   96.97    8.22 
  -1  12   2   91.42    7.81 
  12   1   2   90.98    6.73 
 -12  -1   2   80.87    6.10 
  -1  12   2   91.29    7.94 
 -12   0  -2    0.70    2.14 
  12   0  -2    1.29    1.40 
   0 -12  -2   -1.04    2.69 
   0  12  -2    1.87    2.99 
 -12   0  -2    1.95    1.81 
  12   0  -2   -1.43    2.87 
 -12   0  -2    2.09    2.03 
   0  12  -2    4.28    2.95 
 -12   0  -2    2.97    2.38 
 -12   0   2    2.10    1.43 
   0  12   2    2.10    2.45 
 -12   0   2    2.55    2.65 
   0  12   2    0.72    3.08 
  12   0   2    2.55    3.02 
 -12   0   2    2.12    2.16 
   0 -12   2    0.72    2.77 
  12   0   2    0.20    1.70 
   1  12  -2   92.43    7.95 
 -12   1  -2   82.25    6.61 
  12  -1  -2   94.61    6.10 
 -12   1  -2   91.58    7.60 
 -12   1  -2   89.03    6.59 
 -12   1  -2   81.75    6.68 
   1  12  -2   92.15    8.03 
  -1 -12  -2   80.21    8.24 
  12  -1  -2   75.35    8.18 
 -12   1   2   88.08    6.13 
 -12   1   2   88.21    7.80 
  -1 -12   2   83.58    7.78 
  12  -1   2   91.46    6.65 
  12  -1   2  108.27    8.55 
   1  12   2   90.32    7.86 
   1  12   2   92.10    7.87 
 -12   1   2   89.54    6.97 
 -12   2  -2    4.92    2.22 
 -12   2  -2    1.95    2.69 
 -12   2  -2    2.99    2.01 
   2  12  -2    5.11    3.15 
   2  12  -2    6.36    2.91 
  12  -2  -2    5.73    1.70 
  -2 -12  -2    2.92    2.94 
  12  -2  -2    6.00    3.53 
  12  -2   2    4.43    3.12 
 -12   2   2    5.47    2.95 
 -12   2   2    6.95    1.84 
  12  -2   2    6.20    2.04 
   2  12   2    2.62    3.20 
  -2 -12   2    6.86    3.29 
   2  12   2   -0.04    2.95 
 -12   2   2    6.99    2.55 
  12  -3  -2   24.15    3.05 
 -12   3  -2   20.67    3.01 
  -3 -12  -2   15.66    4.01 
   3  12  -2   19.35    4.13 
 -12   3  -2   21.48    3.80 
  12  -3  -2   20.14    4.24 
 -12   3  -2   26.91    4.07 
   3  12  -2   21.84    4.18 
  12  -3   2   20.89    4.25 
   3  12   2   21.15    4.47 
  12  -3   2   15.97    2.47 
   3  12   2   20.50    4.05 
  12  -3   2   19.25    2.98 
  -3 -12   2   23.83    4.63 
 -12   3   2   20.65    3.82 
 -12   3   2   20.97    3.43 
 -12   4  -2   19.57    3.23 
 -12   4  -2   20.98    3.09 
   4  12  -2   18.98    4.13 
 -12   4  -2   23.28    4.24 
  -4 -12  -2   18.25    4.23 
  12  -4  -2   16.36    4.34 
  12  -4  -2   19.50    2.75 
   4  12  -2   19.54    4.25 
  -4 -12   2   20.01    4.32 
 -12   4   2   24.28    3.50 
  12  -4   2   23.20    4.55 
 -12   4   2   22.46    4.24 
  12  -4   2   23.24    3.11 
   4  12   2   31.13    4.90 
  12  -4   2   18.77    2.42 
   4  12   2   21.09    3.92 
  12  -5  -2   43.24    4.36 
  12  -5  -2   45.03    6.64 
 -12   5  -2   44.76    4.67 
   5  12  -2   37.83    6.33 
 -12   5  -2   37.57    5.87 
  -5 -12  -2   45.62    6.54 
  12  -5   2   43.61    6.58 
 -12   5   2   33.08    5.17 
  -5 -12   2   40.15    6.42 
   5  12   2   34.77    5.93 
  12  -5   2   37.61    4.69 
 -12   5   2   40.59    6.59 
 -12   6  -2   26.66    3.77 
  12  -6  -2   28.88    4.03 
  -6 -12  -2   35.55    5.88 
   6  12  -2   29.81    4.98 
 -12   6  -2   28.84    5.01 
   6  12   2   28.95    5.20 
 -12   6   2   26.14    4.06 
  -6 -12   2   31.81    5.02 
   6  12   2   30.98    4.91 
  12  -6   2   41.72    8.35 
 -12   6   2   28.37    4.77 
  12  -6   2   29.60    4.42 
 -12   7  -2    3.10    3.91 
  12  -7  -2   -1.25    3.69 
   7  12  -2    1.49    3.42 
  12  -7  -2    2.15    2.36 
 -12   7  -2   -0.93    2.58 
  -7 -12  -2    0.13    3.39 
 -12   7   2   -2.11    2.86 
   7  12   2   -3.50    3.71 
  -7 -12   2    1.46    3.55 
  12  -7   2    4.73    3.74 
  12  -7   2    5.85    2.66 
 -12   7   2   -2.25    3.16 
   7  12   2    0.43    3.76 
 -12   8  -2   52.85    6.09 
  12  -8  -2   63.30    7.92 
 -12   8  -2   64.96    8.14 
   8  12  -2   63.13    7.78 
  -8 -12  -2   66.22    8.06 
  12  -8  -2   65.58    6.12 
   8  12   2   59.28    7.64 
 -12   8   2   62.46    7.90 
  12  -8   2   56.21    8.08 
   8  12   2   64.22    8.43 
  12  -8   2   59.04    6.47 
  -8 -12   2   61.28    8.79 
 -12   8   2   49.25    6.57 
   9  12  -2    1.79    4.34 
 -12   9  -2    3.02    3.18 
  -9 -12  -2   -3.29    3.91 
  12  -9  -2   -0.24    4.13 
  12  -9  -2    0.39    2.81 
 -12   9  -2   -3.48    3.79 
 -12   9   2    1.92    4.15 
  -9 -12   2   -1.76    4.48 
   9  12   2    2.49    3.95 
  12  -9   2   -5.99    4.04 
 -12   9   2    3.34    3.42 
  -9 -12   2    1.31    3.94 
  12  -9   2   -2.83    3.00 
  12 -10  -2   40.12    6.40 
  12 -10  -2   42.44    6.37 
 -12  10  -2   31.98    4.86 
  10  12  -2   30.62    5.94 
 -10 -12  -2   38.22    6.14 
 -12  10  -2   31.23    6.39 
 -10 -12  -2   29.87    6.14 
 -12  10   2   39.05    6.23 
  12 -10   2   31.90    5.91 
  10  12   2   37.54    6.11 
 -12  10   2   26.34    4.98 
 -10 -12   2   36.49    6.03 
 -10 -12   2   37.13    6.27 
   9 -13  -2   48.88    8.00 
  -9  13  -2   60.22    9.00 
 -13  -9  -2   57.06    7.95 
  -9  13  -2   68.92    8.13 
 -13  -9  -2   48.00    6.68 
   9 -13  -2   49.99    7.56 
 -13  -9  -2   61.46    8.12 
 -13  -9   2   44.15    7.75 
 -13  -9   2   52.74    7.41 
   9 -13   2   34.02    5.97 
  -9  13   2   51.26    7.44 
 -13  -9   2   49.20    7.80 
 -13  -9   2   38.47    6.56 
  -9  13   2   45.44    6.39 
  -8  13  -2    6.59    4.30 
   8 -13  -2    3.55    3.73 
 -13  -8  -2   -0.17    3.98 
 -13  -8  -2    8.75    4.19 
   8 -13  -2    9.24    3.93 
  -8  13  -2    0.61    3.88 
 -13  -8  -2    3.88    4.04 
 -13  -8  -2    2.73    3.97 
   8 -13   2   10.04    4.02 
 -13  -8   2    7.22    4.44 
  -8  13   2    0.26    3.89 
  -8  13   2   -1.80    4.09 
 -13  -8   2    2.73    3.56 
 -13  -8   2    1.95    4.16 
   7 -13  -2   32.18    5.50 
 -13  -7  -2   35.98    5.61 
  -7  13  -2   49.35    7.12 
 -13  -7  -2   44.32    6.79 
 -13  -7  -2   48.05    6.55 
   7 -13  -2   36.88    6.13 
 -13  -7  -2   43.32    7.09 
  -7  13  -2   40.91    6.09 
 -13  -7   2   33.07    4.79 
   7 -13   2   36.58    5.87 
 -13  -7   2   35.59    6.20 
 -13  -7   2   43.36    7.01 
  -7  13   2   37.28    6.40 
  -6  13  -2   11.94    2.94 
 -13  -6  -2   16.09    4.32 
   6 -13  -2   17.66    4.25 
 -13  -6  -2   19.07    4.26 
   6 -13  -2   15.63    3.42 
  -6  13  -2   18.07    4.43 
  -6  13  -2   17.20    4.97 
 -13  -6  -2   17.24    3.94 
  13   6  -2   17.81    4.43 
 -13  -6   2   14.75    3.48 
  -6  13   2   18.86    4.23 
 -13  -6   2   15.77    4.42 
  -6  13   2   17.54    4.53 
   6 -13   2   15.73    4.31 
 -13  -6   2   17.61    4.24 
 -13  -5  -2   30.25    4.35 
   5 -13  -2   34.18    4.48 
   5 -13  -2   36.87    5.40 
 -13  -5  -2   33.88    5.38 
  -5  13  -2   32.32    3.90 
  -5  13  -2   34.04    5.73 
  -5  13  -2   32.52    5.12 
  13   5  -2   32.57    5.43 
 -13  -5  -2   38.25    5.85 
   5 -13   2   37.08    5.54 
  -5  13   2   42.66    5.61 
 -13  -5   2   33.18    4.97 
 -13  -5   2   22.76    4.78 
 -13  -5   2   32.24    4.88 
  -5  13   2   42.97    6.81 
  -4  13  -2   51.20    3.39 
 -13  -4  -2   40.85    5.97 
 -13  -4  -2   47.94    5.72 
   4 -13  -2   36.25    4.19 
  -4  13  -2   41.57    6.59 
  -4  13  -2   52.73    6.56 
   4 -13  -2   48.80    9.34 
 -13  -4  -2   42.65    5.68 
  13   4  -2   50.61    6.89 
  -4  13   2   41.33    6.56 
  13   4   2   40.75    6.35 
   4 -13   2   46.69    6.50 
 -13  -4   2   36.33    5.62 
 -13  -4   2   46.65    5.21 
  -4  13   2   41.11    6.52 
 -13  -3  -2   24.49    3.71 
  -3  13  -2   18.40    4.53 
 -13  -3  -2   19.44    3.40 
 -13  -3  -2   18.60    4.10 
  13   3  -2   22.56    4.55 
  -3  13  -2   18.94    4.37 
 -13  -3   2   23.76    3.93 
 -13  -3   2   19.49    2.96 
   3 -13   2   12.86    4.32 
 -13  -3   2   19.74    4.19 
  13   3   2   18.28    4.33 
  -3  13   2   20.66    4.61 
  -2  13  -2   74.67    6.94 
 -13  -2  -2   60.91    5.98 
 -13  -2  -2   63.79    6.53 
  13   2  -2   53.98    7.31 
   2 -13  -2   63.85    9.26 
  13   2   2   59.92    7.40 
  -2  13   2   50.63    6.87 
  -2  13   2   57.44    7.27 
 -13  -2   2   54.63    5.07 
 -13  -2   2   57.01    6.84 
 -13  -2   2   55.67    6.22 
  -1  13  -2    4.95    3.82 
   1 -13  -2   -0.24    3.91 
 -13  -1  -2    3.94    2.53 
  -1  13  -2    2.79    3.19 
 -13  -1  -2    4.30    3.28 
  13   1  -2    2.31    3.23 
 -13  -1  -2    3.72    2.86 
  -1  13   2    2.18    3.16 
 -13  -1   2    0.87    1.92 
 -13  -1   2    4.50    2.57 
  13   1   2    3.49    3.78 
 -13  -1   2    7.16    3.19 
  -1  13   2    5.83    3.52 
  13   1   2    4.32    2.24 
   0 -13  -2   78.86    8.88 
 -13   0  -2   78.94    6.68 
   0  13  -2   75.57    7.74 
  13   0  -2   77.79    8.06 
 -13   0  -2   71.00    6.32 
 -13   0  -2   73.71    7.40 
   0  13  -2   72.42    7.56 
 -13   0   2   70.81    7.26 
  13   0   2   82.96    8.44 
  13   0   2   86.25    6.27 
 -13   0   2   71.65    6.66 
   0  13   2   73.27    7.68 
   0  13   2   87.11    7.92 
 -13   1  -2   -1.64    2.89 
  13  -1  -2    5.95    1.73 
 -13   1  -2    6.84    2.65 
   1  13  -2    1.64    3.43 
 -13   1  -2    8.58    3.46 
   1  13  -2    3.57    3.04 
  13  -1   2    2.33    2.14 
 -13   1   2    5.36    3.46 
   1  13   2    5.49    3.87 
   1  13   2    2.94    3.25 
 -13   1   2    3.02    2.59 
   2  13  -2   51.20    7.21 
 -13   2  -2   59.67    5.64 
 -13   2  -2   68.07    6.73 
  13  -2  -2   63.58    4.84 
  13  -2  -2   57.15    8.47 
   2  13  -2   64.08    7.34 
  13  -2   2   45.24    7.82 
 -13   2   2   52.99    7.68 
 -13   2   2   68.18    6.13 
   2  13   2   60.67    6.88 
  13  -2   2   62.10    5.56 
 -13   3  -2   21.72    3.39 
  -3 -13  -2   22.40    4.78 
  13  -3  -2   17.50    4.68 
 -13   3  -2   26.55    4.50 
  13  -3  -2   17.90    2.65 
   3  13  -2   19.68    4.44 
 -13   3   2   21.29    4.97 
   3  13   2   21.98    4.59 
 -13   3   2   26.26    3.88 
  13  -3   2   23.61    4.97 
  -3 -13   2   20.35    6.08 
   3  13   2   23.97    4.59 
  13  -4  -2   32.37    5.85 
   4  13  -2   48.93    6.82 
   4  13  -2   35.89    6.33 
 -13   4  -2   49.55    6.48 
  -4 -13  -2   43.91    7.07 
  13  -4  -2   40.51    4.44 
 -13   4  -2   46.10    5.29 
  13  -4   2   44.49    7.15 
  13  -4   2   41.35    4.94 
 -13   4   2   52.45    6.91 
   4  13   2   45.93    6.90 
 -13   4   2   47.54    5.62 
   4  13   2   49.43    6.92 
  -4 -13   2   53.49    7.12 
   5  13  -2   36.00    5.74 
  -5 -13  -2   31.28    5.35 
 -13   5  -2   30.96    4.13 
  13  -5  -2   47.53    7.34 
   5  13  -2   34.25    5.80 
  13  -5  -2   41.50    4.42 
 -13   5  -2   37.01    6.30 
 -13   5   2   30.71    4.47 
  13  -5   2   43.85    7.47 
   5  13   2   34.42    5.65 
  13  -5   2   33.21    4.86 
  -5 -13   2   28.08    5.17 
 -13   5   2   32.90    5.13 
 -13   6  -2   21.22    4.70 
 -13   6  -2   14.34    3.31 
  -6 -13  -2   15.65    4.62 
   6  13  -2   18.53    4.61 
  13  -6  -2   19.07    3.03 
  13  -6  -2   21.10    4.90 
   6  13  -2   16.27    4.93 
  13  -6   2   17.58    3.51 
   6  13   2   18.50    4.35 
   6  13   2   14.91    4.48 
 -13   6   2   15.67    3.61 
 -13   6   2   19.64    4.82 
  13  -6   2   23.43    5.67 
  -6 -13   2   19.67    4.91 
 -13   7  -2   35.02    6.14 
 -13   7  -2   41.95    5.59 
  13  -7  -2   34.98    6.08 
  -7 -13  -2   31.37    6.35 
  13  -7  -2   40.42    5.21 
   7  13  -2   31.88    5.76 
   7  13   2   33.85    6.23 
  -7 -13   2   41.04    6.41 
  13  -7   2   43.16    5.77 
  13  -7   2   42.32    6.28 
   7  13   2   46.15    7.05 
 -13   7   2   36.83    5.18 
 -13   7   2   47.76    8.25 
  -8 -13  -2    3.48    5.03 
 -13   8  -2    3.32    4.48 
  13  -8  -2    6.70    3.04 
   8  13  -2   -0.19    4.52 
  13  -8  -2    2.27    4.53 
 -13   8  -2   -1.00    3.01 
  13  -8   2   -2.76    4.82 
  13  -8   2    4.16    3.47 
 -13   8   2    1.20    3.48 
  -8 -13   2    4.68    4.46 
   8  13   2   13.36    5.25 
   8  13   2    5.71    4.21 
 -13   8   2   -2.53    4.51 
   9  13  -2   61.07    8.85 
  13  -9  -2   54.64    8.97 
 -13   9  -2   39.37    6.79 
 -13   9  -2   53.37    8.27 
  13  -9  -2   56.95    6.58 
  -9 -13  -2   67.77    9.17 
  13  -9   2   52.38    9.02 
  13  -9   2   50.55    7.05 
 -13   9   2   43.01    6.01 
  -9 -13   2   53.04    8.29 
   9  13   2   62.12    8.39 
  -9 -13   2   67.45    9.30 
 -13   9   2   63.97    9.32 
  -7  14  -2    1.39    4.14 
 -14  -7  -2   -2.03    4.40 
   7 -14  -2    3.17    4.33 
  -7  14  -2    4.21    4.80 
 -14  -7  -2    2.43    3.86 
 -14  -7  -2    1.30    4.16 
 -14  -7  -2    9.00    4.53 
  -7  14   2   -1.63    4.29 
   7 -14   2   -2.46    3.86 
 -14  -7   2    0.68    4.22 
  -7  14   2   -2.57    4.40 
 -14  -7   2   -7.03    4.02 
 -14  -7   2   -0.21    3.87 
 -14  -6  -2   37.41    6.18 
  -6  14  -2   34.74    6.11 
  -6  14  -2   36.17    6.32 
 -14  -6  -2   40.56    6.94 
  14   6  -2   36.96    5.87 
 -14  -6  -2   30.02    5.25 
 -14  -6  -2   49.15    6.73 
   6 -14  -2   31.18    5.74 
 -14  -6   2   32.60    5.52 
  -6  14   2   36.45    6.00 
  -6  14   2   37.63    5.87 
 -14  -6   2   45.99    6.33 
   6 -14   2   35.76    6.19 
 -14  -6   2   36.62    5.53 
  -5  14  -2   32.58    7.86 
 -14  -5  -2   30.85    4.91 
 -14  -5  -2   36.36    5.13 
 -14  -5  -2   31.79    5.23 
  -5  14  -2   37.54    6.13 
  14   5  -2   32.51    5.94 
   5 -14  -2   42.17    6.24 
 -14  -5   2   32.80    4.56 
 -14  -5   2   41.53    6.22 
  -5  14   2   33.42    5.98 
  -5  14   2   41.83    5.91 
 -14  -5   2   43.20    6.87 
   5 -14   2   37.59    6.04 
  14   4  -2   20.64    5.12 
   4 -14  -2   18.89    4.90 
  -4  14  -2   25.53    5.16 
 -14  -4  -2   24.30    4.92 
 -14  -4  -2   24.53    4.21 
 -14  -4  -2   22.63    4.00 
   4 -14   2   26.30    5.15 
  -4  14   2   15.10    5.01 
  -4  14   2   22.86    4.85 
 -14  -4   2   24.51    5.13 
 -14  -4   2   25.46    3.70 
 -14  -4   2   21.59    4.54 
  -3  14  -2   34.91    7.92 
 -14  -3  -2   36.84    5.45 
 -14  -3  -2   41.72    5.63 
  14   3  -2   32.78    5.83 
 -14  -3  -2   31.31    5.09 
  -3  14  -2   30.06    5.71 
   3 -14  -2   36.92    5.89 
  -3  14   2   38.83    5.95 
  14   3   2   33.31    5.96 
 -14  -3   2   35.17    4.92 
  -3  14   2   33.69    5.79 
   3 -14   2   25.28    5.25 
 -14  -3   2   31.50    5.47 
 -14  -3   2   37.10    4.86 
   2 -14  -2    5.93    4.18 
 -14  -2  -2    6.81    3.48 
  -2  14  -2    4.79    4.45 
  -2  14  -2    3.75    4.20 
  14   2  -2   13.42    4.65 
 -14  -2  -2    5.20    2.91 
 -14  -2   2   -1.03    2.88 
  14   2   2    4.07    4.29 
  -2  14   2    9.10    4.25 
 -14  -2   2    1.30    2.31 
   2 -14   2   10.33    4.01 
  -2  14   2    4.73    4.03 
 -14  -2   2    5.68    3.46 
  14   1  -2   76.36    8.70 
   1 -14  -2   81.56    9.05 
  -1  14  -2   96.42    8.64 
 -14  -1  -2   87.29    7.13 
  -1  14  -2   82.64    8.63 
 -14  -1  -2   88.47    8.02 
 -14  -1   2  103.77    8.71 
   1 -14   2   59.39    8.20 
 -14  -1   2   71.70    7.40 
  -1  14   2   83.59    8.64 
  -1  14   2   68.28    8.32 
  14   1   2   70.62    8.67 
 -14  -1   2   81.77    6.37 
   0  14  -2    4.70    3.71 
   0 -14  -2   -0.02    3.89 
 -14   0  -2   -1.09    2.60 
 -14   0  -2    4.72    3.52 
   0  14  -2    2.24    3.50 
  14   0  -2    0.92    3.85 
   0 -14   2    5.71    4.05 
  14   0   2    2.14    3.97 
   0  14   2    0.82    3.53 
   0  14   2    1.54    3.48 
 -14   0   2    0.08    3.10 
  14   0   2    1.97    2.20 
 -14   0   2    2.45    2.90 
   1  14  -2   71.54    8.45 
 -14   1  -2   83.16    7.29 
  14  -1  -2   78.09    8.78 
 -14   1  -2   75.37    8.00 
   1  14  -2   76.26    8.54 
  -1 -14  -2   76.43    9.05 
   1  14   2   78.45    9.03 
  14  -1   2   70.55    9.03 
  -1 -14   2   77.81    8.66 
  14  -1   2   88.41    6.71 
 -14   1   2  101.46    7.83 
 -14   1   2   83.37    7.93 
   1  14   2   90.42    8.44 
  -2 -14  -2    5.35    4.32 
 -14   2  -2    0.82    3.68 
   2  14  -2    4.33    4.11 
  14  -2  -2    7.17    2.32 
  14  -2  -2    0.63    3.93 
   2  14  -2    7.37    3.94 
 -14   2  -2    3.49    3.05 
 -14   2   2    7.36    3.52 
  -2 -14   2    5.34    3.86 
   2  14   2   14.43    4.28 
   2  14   2    2.66    4.03 
  14  -2   2    5.17    2.62 
  14  -2   2    5.93    4.31 
 -14   2   2    8.82    3.34 
   3  14  -2   36.63    6.10 
  -3 -14  -2   25.72    5.73 
 -14   3  -2   39.10    6.58 
  14  -3  -2   31.18    5.75 
   3  14  -2   27.05    5.61 
 -14   3  -2   37.15    5.16 
 -14   3   2   32.22    5.52 
  14  -3   2   37.47    4.93 
   3  14   2   31.16    5.55 
   3  14   2   33.27    5.72 
  14  -3   2   34.10    6.02 
 -14   3   2   43.34    5.67 
  -3 -14   2   26.48    5.59 
 -14   4  -2   22.86    3.90 
  14  -4  -2   22.83    5.09 
   4  14  -2   25.78    5.49 
  -4 -14  -2   21.50    5.32 
 -14   4  -2   26.36    4.83 
  14  -4   2   24.01    3.57 
  -4 -14   2   17.06    4.94 
 -14   4   2   25.20    4.39 
 -14   4   2   26.69    5.21 
   4  14   2   30.81    5.20 
  14  -4   2   18.90    5.31 
   4  14   2   23.01    5.09 
   5  14  -2   41.02    9.34 
  -5 -14  -2   43.64    6.82 
  14  -5  -2   36.29    6.52 
 -14   5  -2   38.93    6.17 
   5  14  -2   29.59    6.45 
 -14   5  -2   33.42    5.52 
  14  -5   2   38.03    5.38 
 -14   5   2   36.37    5.97 
   5  14   2   38.42    6.10 
  -5 -14   2   43.93    6.70 
 -14   5   2   40.06    5.34 
  14  -5   2   37.16    6.52 
   5  14   2   50.84    7.94 
 -14   6  -2   37.15    5.80 
   6  14  -2   55.56    8.44 
  -6 -14  -2   42.67    6.73 
   6  14  -2   31.84    6.11 
  14  -6  -2   36.71    6.51 
 -14   6  -2   31.04    5.93 
   6  14   2   33.71    5.93 
 -14   6   2   37.92    6.03 
  -6 -14   2   39.97    6.59 
  14  -6   2   34.38    5.72 
 -14   6   2   38.74    6.06 
   6  14   2   39.41    7.03 
  14  -6   2   32.18    6.58 
 -14   7  -2   -1.59    5.22 
  -7 -14  -2    2.66    4.84 
 -14   7  -2    0.04    4.56 
  14  -7  -2    2.10    5.16 
   7  14  -2   -2.65    4.34 
   7  14   2    6.33    5.02 
   7  14   2    3.91    4.45 
  -7 -14   2   -0.72    5.02 
  14  -7   2   -6.73    4.61 
 -14   7   2   -0.29    4.32 
  14  -7   2   -0.87    3.45 
 -14   7   2    1.03    3.72 
 -15  -5  -2   11.81    4.30 
   5 -15  -2    9.18    4.89 
 -15  -5  -2    0.97    4.29 
  -5  15  -2    1.55    5.19 
  15   5  -2    4.91    4.94 
  -5  15  -2   -1.12    4.56 
 -15  -5  -2    4.27    4.06 
  -5  15   2    5.35    4.66 
 -15  -5   2    1.24    4.25 
   5 -15   2    7.06    5.08 
  -5  15   2    7.76    5.28 
 -15  -5   2    4.03    4.51 
  15   4  -2   15.92    5.70 
   4 -15  -2   25.62    6.06 
  -4  15  -2   20.40    5.83 
 -15  -4  -2   21.14    4.48 
  -4  15  -2   31.99    5.80 
 -15  -4  -2   23.34    5.15 
   4 -15   2   25.06    5.68 
 -15  -4   2   27.04    5.27 
  -4  15   2   28.71    6.05 
  -4  15   2   33.27    6.46 
 -15  -4   2   24.56    5.52 
  -3  15  -2    6.43    4.71 
 -15  -3  -2    5.47    3.86 
 -15  -3  -2   -0.39    3.67 
  15   3  -2   -2.99    4.51 
 -15  -3  -2   -0.97    3.45 
   3 -15  -2    3.99    4.76 
  -3  15  -2    4.57    3.97 
  -3  15   2    2.20    4.42 
 -15  -3   2   -0.79    3.45 
  -3  15   2    5.12    4.99 
 -15  -3   2    2.78    3.80 
   3 -15   2   -2.44    4.16 
 -15  -2  -2   29.88    4.84 
  15   2  -2   37.36    6.57 
  -2  15  -2   29.98    5.56 
   2 -15  -2   29.72    5.70 
  -2  15  -2   37.14    5.96 
 -15  -2  -2   37.41    6.14 
 -15  -2  -2   33.99    5.60 
  15   2   2   25.35    5.99 
  -2  15   2   33.79    6.11 
  -2  15   2   35.88    6.24 
   2 -15   2   27.55    5.77 
 -15  -2   2   31.15    5.05 
 -15  -2   2   31.41    5.53 
 -15  -1  -2   -1.24    3.80 
   1 -15  -2   -5.75    3.90 
  15   1  -2    8.47    4.71 
  -1  15  -2    1.85    4.37 
  -1  15  -2    0.86    4.32 
 -15  -1  -2   -3.04    3.14 
 -15  -1   2   -2.62    3.70 
  -1  15   2    7.95    4.47 
  -1  15   2    3.55    4.24 
 -15  -1   2   -0.50    3.32 
  15   1   2   -5.91    4.46 
   1 -15   2   -6.28    3.79 
 -15   0  -2   71.88    8.45 
   0 -15  -2   73.71    9.41 
   0  15  -2   83.29    9.36 
 -15   0  -2   70.23    7.07 
  15   0  -2   76.33    9.32 
   0  15  -2   71.05    8.85 
  15   0   2   68.38    9.49 
 -15   0   2   66.65    8.34 
 -15   0   2   72.16    7.48 
   0 -15   2   81.04    9.31 
   0  15   2   66.56    8.79 
   0  15   2   75.82    8.82 
  15   0   2   72.02    6.79 
 -15   1  -2   -0.27    3.03 
   1  15  -2   -0.83    4.57 
 -15   1  -2   -2.76    3.84 
  -1 -15  -2   -0.89    4.40 
  15  -1  -2    4.71    4.75 
   1  15  -2    0.45    4.51 
 -15   1   2   -3.24    4.16 
  15  -1   2   -7.93    4.15 
  -1 -15   2   -3.97    4.15 
   1  15   2   -5.98    3.89 
   1  15   2    3.41    4.39 
  15  -1   2   -1.05    2.97 
 -15   1   2    1.01    3.62 
  -2 -15  -2   36.54    6.53 
 -15   2  -2   34.00    4.74 
  15  -2  -2   52.79    8.57 
 -15   2  -2   33.06    5.94 
   2  15  -2   37.08    6.60 
   2  15  -2   42.20    6.89 
  15  -2   2   23.07    5.91 
 -15   2   2   32.88    5.67 
  15  -2   2   30.00    5.90 
  -2 -15   2   25.30    5.77 
   2  15   2   42.91    6.84 
   2  15   2   39.02    6.36 
 -15   2   2   33.60    5.07 
   3  15  -2    6.03    4.79 
 -15   3  -2    7.57    3.33 
 -15   3  -2    6.28    4.34 
  15  -3  -2   -4.53    4.69 
  -3 -15  -2    5.75    4.81 
   3  15  -2    5.24    4.97 
   3  15   2    5.62    4.68 
  15  -3   2    4.87    5.10 
   3  15   2    4.60    4.57 
 -15   3   2    8.33    4.60 
  -3 -15   2    6.82    4.55 
 -15   3   2    4.84    3.79 
   4  15  -2   26.59    6.37 
  15  -4  -2   25.68    6.17 
 -15   4  -2   31.64    4.63 
  -4 -15  -2   34.00    6.65 
   4  15  -2   25.92    6.08 
 -15   4  -2   34.52    5.97 
   4  15   2   27.55    6.53 
 -15   4   2   30.44    4.89 
 -15   4   2   18.61    5.74 
  -4 -15   2   21.10    6.04 
  15  -4   2   22.74    6.49 
   4  15   2   22.90    5.54 
   5  15  -2    3.18    4.75 
  15  -5  -2   12.50    5.66 
   5  15  -2    4.42    5.35 
  -5 -15  -2    6.30    4.92 
 -15   5  -2    6.37    4.69 
  15  -5   2    3.10    5.39 
  -5 -15   2    5.11    5.12 
   5  15   2    1.85    4.74 
 -15   5   2    5.26    4.98 
   5  15   2    6.58    5.45 
 -15   5   2    6.58    4.29 
   0   0  -3    0.28    0.21 
   0   0  -3    0.07    0.10 
   0   0  -3   -0.02    0.07 
   0   0   3    0.07    0.15 
   0   0   3    0.40    0.24 
   0   0   3   -0.04    0.12 
   0   0   3    0.08    0.19 
  -1   0  -3    0.55    0.28 
   1   0  -3    1.06    0.26 
   0   1  -3    0.80    0.24 
  -1   0  -3    0.85    0.15 
  -1   0  -3    1.23    0.28 
   0  -1  -3    0.77    0.32 
   1   0  -3    0.77    0.14 
   0  -1  -3    0.84    0.23 
   1   0  -3    0.92    0.29 
   0   1  -3    0.77    0.25 
   0   1  -3    0.96    0.26 
   0  -1  -3    0.98    0.28 
   0   1   3    0.96    0.28 
  -1   0   3    0.91    0.22 
   0   1   3    0.78    0.25 
  -1   0   3    1.11    0.31 
   0  -1   3    0.84    0.24 
   0   1   3    1.04    0.19 
   0   1   3    0.88    0.24 
   0  -1   3    0.91    0.28 
   0  -1   3    0.81    0.21 
   1   0   3    0.71    0.13 
  -1   0   3    0.94    0.26 
  -1   0   3    0.85    0.14 
   1   0   3    0.93    0.27 
   1   0   3    1.18    0.18 
   1  -1  -3   34.36    2.20 
  -1  -1  -3   34.37    2.09 
  -1   1  -3   33.27    2.18 
   1  -1  -3   33.05    2.10 
   1   1  -3   34.57    2.17 
  -1   1  -3   31.72    2.08 
  -1  -1  -3   31.06    2.16 
   1  -1  -3   34.34    2.15 
  -1  -1  -3   34.40    2.17 
  -1  -1  -3   34.67    2.01 
   1   1  -3   32.37    2.11 
   1   1  -3   32.50    2.18 
  -1   1  -3   33.56    1.96 
  -1   1  -3   33.91    2.18 
   1   1  -3   34.20    2.08 
   1  -1  -3   34.27    2.07 
  -1  -1   3   37.16    2.21 
   1   1   3   34.73    2.01 
  -1   1   3   32.32    2.14 
  -1  -1   3   30.22    2.10 
  -1   1   3   32.66    2.11 
  -1  -1   3   34.73    2.16 
   1   1   3   33.51    2.18 
   1  -1   3   30.68    2.08 
   1  -1   3   33.77    2.19 
  -1  -1   3   37.17    2.09 
   1   1   3   34.71    2.11 
   1  -1   3   34.20    1.96 
   1  -1   3   33.49    2.16 
   1   1   3   35.62    2.19 
   2   1  -3   39.09    2.63 
   2   1  -3   38.52    2.65 
  -2  -1  -3   40.50    2.54 
   1  -2  -3   38.26    2.62 
  -1   2  -3   36.33    2.55 
   1  -2  -3   38.02    2.63 
   1  -2  -3   39.69    2.60 
   2   1  -3   41.79    2.72 
  -1   2  -3   40.07    2.71 
  -2  -1  -3   38.77    2.69 
   2   1  -3   38.45    2.46 
  -2  -1  -3   41.09    2.55 
  -1   2  -3   40.74    2.59 
  -1   2  -3   38.15    2.64 
   1  -2  -3   42.31    2.65 
  -2  -1  -3   42.39    2.67 
  -1   2  -3   38.85    2.51 
  -2  -1   3   45.20    2.48 
   1  -2   3   39.81    2.63 
  -1   2   3   44.42    2.64 
   1  -2   3   41.49    2.51 
   1  -2   3   41.82    2.74 
   2   1   3   45.41    2.59 
  -2  -1   3   43.83    2.73 
  -1   2   3   43.17    2.67 
   2   1   3   46.43    2.73 
  -2  -1   3   41.89    2.69 
  -1   2   3   39.77    2.64 
  -1   2   3   43.94    2.65 
  -2   0  -3  247.09   13.76 
  -2   0  -3  249.02   13.86 
   0  -2  -3  246.64   13.83 
   0   2  -3  238.92   13.90 
   2   0  -3  243.06   13.86 
   0  -2  -3  247.68   13.86 
  -2   0  -3  238.12   13.92 
   2   0  -3  223.51   13.90 
   0   2  -3  235.74   13.72 
   0   2  -3  238.99   13.89 
   0   2  -3  252.71   13.85 
   0  -2  -3  249.52   13.78 
  -2   0  -3  249.03   13.66 
   0  -2  -3  242.69   13.92 
   2   0   3  241.30   13.85 
   0   2   3  235.48   13.86 
  -2   0   3  245.84   13.93 
   2   0   3  235.37   13.76 
   0  -2   3  245.40   13.83 
  -2   0   3  248.84   13.87 
   0  -2   3  248.38   13.89 
   0  -2   3  242.04   13.72 
   0  -2   3  256.74   13.93 
   0   2   3  240.72   13.78 
   0   2   3  237.00   13.82 
  -2   0   3  244.73   13.91 
   1   2  -3   41.25    2.67 
  -2   1  -3   42.66    2.70 
   2  -1  -3   43.68    2.48 
  -1  -2  -3   43.80    2.74 
   2  -1  -3   45.22    2.69 
  -2   1  -3   44.98    2.39 
   1   2  -3   43.46    2.53 
  -1  -2  -3   44.37    2.69 
  -2   1  -3   39.71    2.61 
  -1  -2  -3   42.91    2.58 
   1   2  -3   42.84    2.73 
  -1  -2  -3   42.46    2.64 
   1   2  -3   36.25    2.71 
  -2   1  -3   48.63    2.77 
   2  -1  -3   44.28    2.71 
   2  -1   3   41.57    2.38 
   2  -1   3   39.54    2.61 
   2  -1   3   37.14    2.70 
  -1  -2   3   37.11    2.65 
   1   2   3   38.66    2.58 
   2  -1   3   38.76    2.68 
  -1  -2   3   39.42    2.53 
  -2   1   3   39.70    2.69 
   1   2   3   37.77    2.66 
  -2   1   3   38.43    2.66 
  -1  -2   3   39.42    2.71 
   1   2   3   40.34    2.63 
  -2   1   3   41.64    2.47 
  -1  -2   3   44.49    2.73 
  -2   1   3   46.04    2.79 
  -2  -2  -3    2.38    0.51 
   2   2  -3    1.86    0.55 
   2   2  -3    2.84    0.51 
  -2  -2  -3    2.46    0.49 
  -2   2  -3    1.74    0.49 
  -2   2  -3    3.02    0.60 
   2   2  -3    2.75    0.50 
  -2   2  -3    2.70    0.52 
  -2  -2  -3    2.77    0.60 
   2  -2  -3    2.33    0.54 
   2  -2  -3    2.20    0.57 
   2  -2  -3    2.84    0.52 
  -2  -2  -3    2.62    0.49 
   2  -2  -3    2.47    0.49 
  -2   2  -3    2.93    0.42 
  -2   2   3    1.93    0.49 
  -2   2   3    2.55    0.55 
  -2  -2   3    2.23    0.55 
  -2  -2   3    1.92    0.57 
  -2  -2   3    2.49    0.46 
   2   2   3    2.92    0.63 
   2  -2   3    3.23    0.42 
   2   2   3    2.88    0.59 
   2  -2   3    2.29    0.54 
  -2   2   3    2.33    0.46 
   2  -2   3    3.50    0.58 
   2  -2   3    2.97    0.64 
  -2   2   3    2.51    0.56 
   2   2   3    1.98    0.44 
  -2  -2   3    2.53    0.48 
  -2  -2   3    2.92    0.64 
  -3  -2  -3  207.57   13.05 
   2  -3  -3  192.17   13.05 
   2  -3  -3  204.76   13.06 
  -2   3  -3  203.83   13.00 
   3   2  -3  200.29   12.94 
  -2   3  -3  207.84   12.92 
  -3  -2  -3  199.32   13.02 
   3   2  -3  212.61   13.22 
  -2   3  -3  203.34   13.16 
  -2   3   3  241.66   13.15 
  -3  -2   3  252.71   13.00 
  -3  -2   3  240.31   13.22 
  -2   3   3  244.49   13.13 
   2  -3   3  233.43   13.22 
  -3  -2   3  250.87   13.31 
   2  -3   3  247.28   13.09 
   2  -3   3  245.51   13.22 
  -2   3   3  254.13   13.18 
   3   2   3  235.87   13.08 
  -2   3   3  245.82   13.19 
   3   2   3  243.39   13.14 
   1  -3  -3  124.72    7.14 
  -1   3  -3  126.96    6.94 
  -1   3  -3  120.94    7.00 
   1  -3  -3  132.80    7.12 
   3   1  -3  120.88    7.12 
  -3  -1  -3  137.98    7.10 
  -3  -1  -3  125.39    7.01 
   3   1  -3  134.44    7.16 
   3   1  -3  121.40    7.16 
  -3  -1  -3  118.28    7.12 
  -3  -1  -3  122.93    6.97 
  -1   3  -3  113.46    7.35 
  -3  -1  -3  128.25    7.04 
   1  -3  -3  124.01    7.02 
   1  -3  -3  129.64    7.07 
  -1   3  -3  125.28    6.91 
  -1   3  -3  121.14    7.14 
  -1   3   3  114.87    7.09 
  -3  -1   3  114.86    7.09 
  -3  -1   3  101.68    7.11 
  -3  -1   3  104.67    6.78 
   3   1   3  108.58    6.94 
  -3  -1   3  112.14    6.81 
  -1   3   3  113.96    7.09 
  -1   3   3  119.09    7.01 
   3   1   3  112.51    7.05 
   1  -3   3  112.72    7.16 
   1  -3   3  113.91    7.07 
   1  -3   3  104.03    6.93 
  -1   3   3  115.88    7.05 
  -3  -1   3  110.92    7.07 
   0   3  -3    1.61    0.54 
   0   3  -3    2.17    0.37 
  -3   0  -3    2.25    0.47 
   0  -3  -3    2.09    0.60 
  -3   0  -3    2.15    0.49 
   3   0  -3    2.02    0.51 
  -3   0  -3    2.11    0.37 
  -3   0  -3    2.60    0.57 
   0   3  -3    1.91    0.57 
   0  -3  -3    2.69    0.50 
   3   0  -3    1.65    0.52 
   0   3  -3    1.90    0.53 
   0  -3  -3    2.05    0.51 
   0  -3  -3    2.39    0.48 
  -3   0  -3    2.57    0.41 
  -3   0   3    2.89    0.60 
  -3   0   3    2.04    0.57 
   0   3   3    2.15    0.46 
   0  -3   3    2.37    0.59 
  -3   0   3    2.51    0.56 
   0   3   3    1.88    0.56 
   0   3   3    2.32    0.60 
   0  -3   3    2.10    0.63 
  -3   0   3    2.86    0.27 
   3   0   3    2.31    0.45 
   3   0   3    1.90    0.51 
   0  -3   3    2.32    0.36 
   0  -3   3    1.60    0.50 
   0   3   3    2.42    0.52 
   3   0   3    2.00    0.61 
   3  -1  -3  105.81    7.14 
  -1  -3  -3  111.90    7.19 
   1   3  -3  109.03    7.15 
  -3   1  -3  120.02    7.05 
   3  -1  -3  112.84    7.15 
   3  -1  -3  125.37    7.08 
  -1  -3  -3  106.78    7.07 
   1   3  -3  108.31    7.10 
   1   3  -3  116.97    7.13 
  -1  -3  -3  115.69    6.97 
   3  -1  -3  116.74    6.79 
   1   3  -3  115.34    6.79 
  -1  -3  -3  111.85    6.99 
  -3   1  -3  112.71    7.04 
  -3   1  -3  113.35    6.78 
   3  -1   3  131.71    7.11 
  -1  -3   3  125.40    7.17 
   3  -1   3  124.72    7.07 
   1   3   3  123.34    7.06 
  -3   1   3  125.09    6.81 
  -3   1   3  120.34    7.15 
  -1  -3   3  129.66    7.18 
  -3   1   3  123.25    7.24 
  -3   1   3  119.22    7.06 
  -1  -3   3  130.04    6.82 
   1   3   3  125.07    6.97 
   1   3   3  123.28    7.17 
  -1  -3   3  119.32    7.21 
   3  -1   3  123.77    7.22 
   3  -1   3  127.34    6.80 
   3  -2  -3  248.86   13.08 
  -2  -3  -3  254.71   12.93 
   3  -2  -3  256.38   13.05 
  -3   2  -3  232.23   12.63 
   3  -2  -3  215.77   13.05 
  -3   2  -3  236.59   12.94 
   2   3  -3  222.40   13.05 
   2   3  -3  238.14   13.06 
   2   3  -3  244.90   12.97 
  -2  -3  -3  242.53   13.04 
  -2  -3  -3  236.52   12.85 
  -3   2  -3  236.10   13.24 
   2   3  -3  236.53   12.71 
   3  -2  -3  252.21   12.78 
  -3   2  -3  247.09   13.03 
  -2  -3  -3  245.74   13.13 
  -2  -3   3  197.28   12.96 
   2   3   3  210.30   12.95 
  -3   2   3  235.81   13.32 
   3  -2   3  209.40   12.95 
   2   3   3  201.08   12.84 
  -2  -3   3  192.76   12.94 
  -2  -3   3  184.81   12.84 
   3  -2   3  188.68   12.58 
  -3   2   3  205.09   12.85 
  -2  -3   3  194.32   12.66 
  -3   2   3  188.21   12.88 
  -3   2   3  200.75   12.71 
   3  -3  -3  131.75    7.65 
   3  -3  -3  121.39    7.46 
  -3  -3  -3  129.99    7.60 
  -3   3  -3  132.46    7.67 
  -3   3  -3  120.37    7.57 
  -3   3  -3  131.13    7.32 
   3   3  -3  130.37    7.53 
  -3  -3  -3  122.22    7.58 
  -3  -3  -3  124.56    7.52 
   3  -3  -3  127.65    7.60 
  -3  -3  -3  122.30    7.53 
   3   3  -3  121.21    7.40 
   3   3  -3  111.45    7.64 
  -3  -3  -3  135.08    7.51 
   3  -3  -3  122.83    7.50 
  -3  -3   3  126.22    7.41 
  -3  -3   3  130.51    7.50 
   3   3   3  119.56    7.60 
   3  -3   3  142.26    7.33 
   3  -3   3  112.71    7.52 
   3   3   3  120.71    7.52 
  -3   3   3  116.79    7.57 
  -3   3   3  120.87    7.58 
  -3   3   3  129.29    7.48 
   3  -3   3  124.13    7.61 
  -3  -3   3  126.88    7.71 
   3  -3   3  122.71    7.57 
  -3  -3   3  132.33    7.71 
  -3   3   3  126.83    7.52 
   3  -4  -3  106.02    5.90 
  -4  -3  -3  100.07    5.90 
  -4  -3  -3  100.38    5.85 
  -3   4  -3   91.80    6.07 
  -3   4  -3  103.11    5.70 
   3  -4  -3   95.58    5.86 
   3  -4  -3  102.99    5.91 
   4   3  -3   95.42    6.15 
   3  -4  -3  103.02    5.96 
  -4  -3  -3   96.09    5.89 
  -3   4  -3  102.21    6.02 
  -4  -3  -3   99.01    5.88 
   4   3  -3  102.00    5.84 
   4   3   3   84.06    5.83 
  -4  -3   3   86.58    6.02 
  -3   4   3   79.95    6.23 
   3  -4   3   89.14    5.59 
   3  -4   3   76.08    6.10 
  -3   4   3   89.57    5.82 
   3  -4   3   92.11    5.88 
  -4  -3   3   94.12    6.01 
   3  -4   3   86.72    5.76 
  -3   4   3   84.91    5.78 
   4   3   3   86.93    5.81 
  -3   4   3   91.00    5.81 
  -4  -3   3   85.78    5.69 
  -4  -3   3   86.14    5.90 
   2  -4  -3   57.65    3.75 
  -2   4  -3   59.78    3.67 
   4   2  -3   55.14    3.91 
   4   2  -3   58.36    3.84 
   2  -4  -3   56.52    3.79 
  -2   4  -3   54.65    3.68 
  -4  -2  -3   60.29    3.82 
  -2   4  -3   59.29    3.93 
   2  -4  -3   54.52    3.77 
   2  -4  -3   54.28    3.84 
  -4  -2  -3   57.34    3.83 
  -2   4  -3   56.34    3.92 
  -4  -2  -3   52.73    3.92 
  -4  -2   3   60.27    3.99 
  -2   4   3   59.84    3.89 
   2  -4   3   58.77    3.67 
  -4  -2   3   54.14    3.59 
   2  -4   3   58.03    3.97 
  -4  -2   3   56.37    3.58 
  -2   4   3   58.47    3.86 
  -2   4   3   55.55    3.83 
   4   2   3   55.96    3.78 
  -2   4   3   56.82    3.73 
   2  -4   3   61.31    3.68 
  -4  -2   3   68.53    3.89 
   2  -4   3   56.04    3.84 
   4   2   3   57.91    3.88 
  -4  -2   3   59.63    3.90 
   4   2   3   58.83    3.85 
  -1   4  -3  180.87   10.12 
   1  -4  -3  167.68    9.78 
   4   1  -3  166.86    9.94 
  -1   4  -3  166.65    9.66 
  -1   4  -3  168.79    9.89 
  -4  -1  -3  158.68    9.89 
  -1   4  -3  182.45    9.67 
   1  -4  -3  164.20   10.01 
   1  -4  -3  171.71    9.91 
  -4  -1  -3  169.50   10.02 
   1  -4  -3  165.37    9.91 
  -1   4  -3  162.38    9.99 
  -4  -1  -3  167.03    9.89 
  -4  -1  -3  170.89    9.80 
   4   1  -3  154.54    9.96 
  -4  -1   3  163.99    9.98 
   4   1   3  170.65   10.05 
   1  -4   3  162.31   10.05 
   1  -4   3  173.00    9.98 
  -4  -1   3  170.91    9.58 
  -1   4   3  169.09   10.01 
  -1   4   3  161.69    9.95 
  -1   4   3  170.76    9.78 
  -1   4   3  163.88    9.92 
  -4  -1   3  171.34    9.61 
  -4  -1   3  170.73    9.95 
   1  -4   3  175.51    9.87 
  -4  -1   3  163.16    9.97 
   4   1   3  171.04    9.90 
   0   4  -3  125.29    7.84 
   0  -4  -3  132.20    7.62 
  -4   0  -3  141.18    7.84 
   0  -4  -3  128.97    7.96 
  -4   0  -3  133.27    7.63 
  -4   0  -3  130.03    7.58 
  -4   0  -3  134.16    7.96 
   4   0  -3  141.37    8.03 
   0   4  -3  132.49    7.43 
   0   4  -3  123.27    7.93 
   0   4  -3  121.59    7.91 
   0  -4  -3  140.44    7.90 
   4   0  -3  133.16    7.43 
  -4   0  -3  132.11    7.76 
   0   4  -3  132.18    7.44 
   4   0  -3  134.88    7.83 
  -4   0   3  129.83    7.95 
   0   4   3  129.24    7.64 
   0  -4   3  133.77    7.91 
  -4   0   3  120.39    7.89 
   0  -4   3  123.34    7.89 
  -4   0   3  129.20    7.81 
   0   4   3  125.60    7.89 
   0  -4   3  119.31    7.92 
   4   0   3  132.40    7.98 
   0   4   3  134.05    8.00 
   0   4   3  130.43    7.83 
   4   0   3  134.61    7.79 
   4   0   3  129.34    7.84 
  -4   0   3  137.10    7.44 
  -1  -4  -3  165.49    9.95 
  -4   1  -3  153.90    9.73 
  -1  -4  -3  179.36    9.88 
  -4   1  -3  162.99    9.46 
   4  -1  -3  155.49    9.91 
   4  -1  -3  164.64    9.72 
  -4   1  -3  155.81    9.93 
   1   4  -3  153.05    9.88 
   1   4  -3  165.92    9.32 
   1   4  -3  153.86    9.83 
  -1  -4  -3  168.45    9.57 
  -4   1  -3  149.39    9.85 
   4  -1  -3  164.02    9.85 
   1   4  -3  174.02    9.91 
   4  -1  -3  173.26    9.42 
  -4   1   3  181.27    9.46 
  -1  -4   3  175.89    9.89 
   1   4   3  167.16    9.56 
  -1  -4   3  150.44    9.83 
   1   4   3  160.91    9.86 
  -4   1   3  165.01    9.88 
  -1  -4   3  164.59    9.87 
  -4   1   3  171.02    9.76 
   1   4   3  167.75    9.79 
  -4   1   3  187.64   10.00 
   4  -1   3  170.86    9.48 
   4  -1   3  149.99    9.86 
   4  -1   3  174.36    9.80 
   1   4   3  172.38    9.98 
  -1  -4   3  167.55    9.32 
   4  -1   3  166.95    9.73 
   4  -2  -3   57.57    3.51 
   2   4  -3   60.18    3.40 
   4  -2  -3   54.33    3.86 
   4  -2  -3   56.79    3.68 
  -2  -4  -3   54.95    3.92 
  -2  -4  -3   64.02    3.89 
  -2  -4  -3   58.92    3.76 
  -4   2  -3   54.60    3.74 
  -4   2  -3   58.14    3.43 
   2   4  -3   54.26    3.91 
   2   4  -3   56.07    3.83 
  -4   2  -3   54.72    3.75 
  -4   2  -3   58.40    3.83 
   4  -2  -3   56.76    3.83 
   2   4  -3   58.72    3.93 
  -2  -4  -3   57.66    3.57 
   2   4   3   53.16    3.75 
   4  -2   3   55.01    3.73 
   2   4   3   52.61    3.83 
  -4   2   3   55.46    3.87 
  -4   2   3   55.85    3.51 
  -2  -4   3   57.87    3.89 
   4  -2   3   56.36    3.42 
  -4   2   3   56.71    3.71 
  -2  -4   3   54.88    3.38 
  -4   2   3   53.31    3.77 
  -2  -4   3   57.13    3.88 
   4  -2   3   61.03    3.90 
  -2  -4   3   55.46    3.82 
   4  -2   3   55.54    3.76 
  -3  -4  -3   93.20    5.80 
   3   4  -3   81.67    6.17 
  -3  -4  -3   87.87    5.99 
  -3  -4  -3   87.96    5.92 
  -3  -4  -3   87.39    5.82 
  -3  -4  -3   90.82    6.03 
   4  -3  -3   88.17    5.87 
   3   4  -3   84.35    6.14 
  -4   3  -3   92.99    6.03 
  -4   3  -3   89.63    5.99 
   4  -3  -3   90.77    6.12 
   3   4  -3   89.93    5.69 
   4  -3  -3   87.11    6.00 
   3   4  -3   90.08    5.98 
  -4   3  -3   86.97    5.65 
   4  -3   3  107.89    5.70 
  -3  -4   3  106.81    6.25 
  -4   3   3  100.08    5.86 
  -4   3   3  101.39    5.97 
   4  -3   3  102.25    6.06 
   4  -3   3  104.39    6.12 
  -4   3   3   98.61    6.18 
  -4   3   3  105.34    6.20 
  -3  -4   3   99.63    6.03 
  -3  -4   3  106.57    6.20 
   4  -3   3  106.71    6.10 
  -3  -4   3  108.82    5.75 
   3   4   3  100.35    6.06 
   4   4  -3   66.09    4.64 
  -4  -4  -3   62.32    4.14 
  -4  -4  -3   63.82    4.31 
   4  -4  -3   62.02    4.25 
  -4  -4  -3   67.85    4.30 
   4  -4  -3   62.96    4.15 
   4  -4  -3   57.98    4.95 
   4   4  -3   58.73    4.01 
  -4   4  -3   60.64    4.22 
   4  -4  -3   64.43    4.18 
  -4  -4  -3   63.88    4.27 
  -4   4  -3   62.34    4.50 
  -4  -4  -3   62.52    4.09 
   4   4  -3   64.02    4.22 
  -4  -4  -3   60.57    4.52 
  -4   4  -3   64.08    3.97 
  -4   4  -3   65.97    4.36 
  -4   4   3   60.62    4.14 
   4  -4   3   60.45    4.22 
   4   4   3   61.78    4.50 
  -4  -4   3   63.52    4.20 
  -4  -4   3   66.31    4.47 
   4  -4   3   63.13    4.24 
   4  -4   3   64.26    4.47 
  -4  -4   3   65.99    4.47 
   4  -4   3   61.72    3.92 
  -4   4   3   57.54    4.39 
  -4  -4   3   64.64    4.04 
   4   4   3   60.22    4.23 
  -4   4   3   55.36    4.25 
  -4   4   3   55.03    4.47 
  -5  -4  -3  245.32   13.89 
  -5  -4  -3  250.33   14.13 
  -5  -4  -3  238.99   13.93 
  -4   5  -3  270.19   13.89 
   4  -5  -3  255.86   13.84 
   5   4  -3  234.49   14.16 
   4  -5  -3  246.11   14.00 
  -5  -4  -3  240.13   13.79 
  -4   5  -3  265.00   13.67 
   4  -5  -3  247.07   13.96 
  -4   5  -3  256.47   14.09 
  -4   5  -3  256.60   14.11 
   5   4  -3  243.96   13.75 
  -5  -4  -3  258.61   13.97 
   4  -5   3  204.90   13.49 
  -5  -4   3  226.49   14.04 
  -4   5   3  215.73   13.82 
  -4   5   3  210.87   13.78 
   5   4   3  213.72   13.87 
   4  -5   3  207.78   13.91 
  -5  -4   3  217.15   13.96 
   4  -5   3  219.44   13.87 
  -5  -4   3  229.41   14.03 
  -5  -4   3  222.75   13.70 
  -4   5   3  215.18   13.98 
  -4   5   3  217.38   13.78 
   5   4   3  223.10   13.95 
  -5  -4   3  210.91   13.63 
  -3   5  -3   70.55    5.05 
  -3   5  -3   64.75    4.67 
   5   3  -3   65.11    5.08 
   3  -5  -3   75.86    4.84 
  -3   5  -3   73.08    5.04 
  -5  -3  -3   67.34    4.84 
  -5  -3  -3   74.96    4.91 
   3  -5  -3   73.40    4.92 
  -5  -3  -3   72.01    4.85 
  -5  -3  -3   75.92    4.92 
   3  -5  -3   71.12    4.82 
   5   3  -3   68.45    4.83 
  -3   5  -3   67.87    4.69 
  -5  -3   3   74.24    5.13 
  -5  -3   3   76.54    5.02 
  -5  -3   3   74.85    4.86 
  -5  -3   3   79.22    5.11 
   3  -5   3   71.07    4.73 
  -3   5   3   82.99    4.89 
   3  -5   3   76.19    4.66 
  -5  -3   3   75.50    4.71 
   3  -5   3   74.45    5.21 
   3  -5   3   79.79    4.96 
  -3   5   3   76.21    5.14 
  -3   5   3   82.76    5.04 
  -3   5   3   79.07    5.10 
   5   2  -3  154.64    9.59 
   2  -5  -3  159.43    9.51 
  -5  -2  -3  157.78    9.51 
  -5  -2  -3  157.12    9.58 
   2  -5  -3  152.81    9.48 
  -5  -2  -3  156.07    9.52 
  -2   5  -3  162.16    9.26 
   2  -5  -3  160.79    9.38 
  -2   5  -3  143.90    9.63 
  -2   5  -3  166.44    9.73 
  -2   5  -3  151.81    9.41 
  -5  -2  -3  174.03    9.49 
  -5  -2  -3  161.62    9.47 
  -2   5   3  132.89    9.46 
   2  -5   3  155.81    9.73 
  -5  -2   3  154.31    9.62 
   2  -5   3  162.17    9.38 
  -2   5   3  156.53    9.61 
   2  -5   3  169.43    9.29 
   2  -5   3  161.12    9.58 
  -5  -2   3  169.32    9.21 
  -5  -2   3  135.91    9.54 
  -5  -2   3  162.84    9.24 
   5   2   3  162.29    9.51 
  -2   5   3  170.16    9.69 
  -5  -2   3  166.04    9.58 
  -2   5   3  147.02    9.57 
   1  -5  -3  122.72    7.18 
  -1   5  -3  115.94    7.13 
  -5  -1  -3  122.74    7.26 
   5   1  -3  120.44    7.18 
   1  -5  -3  124.74    7.17 
  -5  -1  -3  122.53    7.16 
  -5  -1  -3  126.38    7.07 
  -1   5  -3  121.26    6.77 
  -5  -1  -3  113.50    6.95 
  -1   5  -3  106.22    7.27 
  -5  -1  -3  105.22    7.18 
   1  -5  -3  125.18    6.93 
  -1   5  -3  128.92    7.40 
  -5  -1  -3  118.78    7.13 
  -1   5  -3  114.43    6.73 
   1  -5  -3  109.76    7.67 
  -5  -1   3  112.00    7.36 
   1  -5   3  119.31    7.43 
  -5  -1   3  113.38    7.23 
  -1   5   3  119.53    7.29 
  -5  -1   3  112.58    7.22 
  -1   5   3   95.62    7.34 
  -5  -1   3  102.11    7.11 
  -1   5   3  115.01    6.90 
   1  -5   3  111.72    7.18 
   1  -5   3  116.21    7.08 
  -1   5   3  117.62    7.27 
   5   1   3  113.97    7.06 
   5   1   3  106.04    7.37 
  -5  -1   3  118.12    6.73 
   5   0  -3   48.80    3.68 
   5   0  -3   47.08    2.94 
   0  -5  -3   49.19    3.37 
  -5   0  -3   47.22    3.35 
   0   5  -3   48.70    3.44 
  -5   0  -3   50.29    3.53 
   0   5  -3   53.06    3.62 
   0  -5  -3   44.30    3.35 
  -5   0  -3   48.76    3.28 
  -5   0  -3   46.95    3.12 
   0  -5  -3   47.63    3.07 
   0   5  -3   47.71    2.83 
   0   5  -3   46.95    3.66 
   5   0  -3   47.11    3.34 
   0   5  -3   48.68    2.83 
   5   0   3   54.27    3.78 
   0  -5   3   47.72    3.38 
   0   5   3   51.22    3.59 
   5   0   3   49.46    3.34 
   0  -5   3   48.65    3.49 
   0   5   3   44.63    3.56 
  -5   0   3   47.31    3.66 
  -5   0   3   45.66    3.35 
  -5   0   3   56.04    3.62 
  -5   0   3   52.69    2.98 
   0  -5   3   48.32    3.76 
   5   0   3   49.46    3.38 
   0   5   3   48.76    3.10 
   0   5   3   49.28    3.42 
  -1  -5  -3  118.34    7.28 
   5  -1  -3  113.71    7.30 
  -5   1  -3  117.99    7.22 
  -5   1  -3  122.43    7.15 
  -5   1  -3  110.28    6.86 
   5  -1  -3  126.10    7.53 
  -5   1  -3   99.86    7.25 
  -1  -5  -3  110.22    7.44 
   5  -1  -3  116.39    7.14 
   1   5  -3   99.48    7.60 
  -1  -5  -3  117.23    7.19 
   1   5  -3  120.40    7.37 
   1   5  -3  101.21    7.34 
   5  -1  -3  122.29    6.78 
  -1  -5  -3  114.19    6.86 
  -5   1   3  115.16    7.15 
  -1  -5   3  127.78    7.34 
  -1  -5   3  118.12    7.30 
   1   5   3  118.68    6.87 
   1   5   3  116.16    7.24 
  -1  -5   3  110.16    7.48 
  -5   1   3  118.74    7.43 
  -5   1   3  125.72    7.43 
   5  -1   3  113.53    7.10 
   5  -1   3  122.43    6.90 
  -5   1   3  125.93    6.83 
   1   5   3  120.89    7.43 
   5  -1   3  120.06    7.23 
   1   5   3  120.88    7.45 
   5  -1   3  129.98    7.57 
   2   5  -3  175.38    9.85 
   5  -2  -3  167.96    9.30 
  -5   2  -3  172.00    9.29 
  -2  -5  -3  159.01    9.92 
   5  -2  -3  159.85    9.55 
  -2  -5  -3  165.76    9.64 
  -2  -5  -3  168.75    9.77 
   2   5  -3  170.82    9.94 
   2   5  -3  167.40    9.08 
   5  -2  -3  138.53    9.77 
   5  -2  -3  164.03    9.74 
  -5   2  -3  149.10    9.69 
  -2  -5  -3  165.17    9.35 
  -5   2  -3  162.60    9.61 
   2   5  -3  160.55    9.93 
   2   5   3  163.56    9.89 
  -2  -5   3  147.82    9.81 
   5  -2   3  159.23    9.55 
  -5   2   3  151.82    9.79 
   5  -2   3  166.44    9.70 
   5  -2   3  146.79    9.80 
  -2  -5   3  163.57    9.82 
  -5   2   3  163.90    9.33 
  -2  -5   3  152.16    9.07 
   5  -2   3  159.79    9.27 
  -5   2   3  157.91    9.56 
  -5   2   3  155.24    9.76 
   2   5   3  154.48    9.66 
  -2  -5   3  155.48    9.74 
   3   5  -3   83.44    5.49 
   3   5  -3   79.25    4.62 
  -3  -5  -3   78.79    5.06 
  -3  -5  -3   80.21    5.17 
  -3  -5  -3   79.72    4.76 
  -5   3  -3   75.94    5.07 
  -5   3  -3   78.40    5.26 
   5  -3  -3   75.89    4.79 
   5  -3  -3   84.96    5.47 
  -3  -5  -3   73.63    5.39 
   5  -3  -3   77.99    4.96 
  -5   3  -3   81.67    5.18 
  -5   3  -3   79.15    4.69 
   5  -3  -3   88.26    5.27 
   3   5  -3   84.56    5.19 
  -3  -5  -3   76.05    4.80 
   3   5  -3   73.51    5.34 
   5  -3   3   76.30    4.67 
  -3  -5   3   73.61    5.26 
  -5   3   3   72.50    5.31 
  -3  -5   3   72.12    5.18 
   5  -3   3   78.49    5.31 
   5  -3   3   71.57    5.06 
  -5   3   3   69.80    5.19 
  -5   3   3   71.32    4.77 
   3   5   3   69.27    5.21 
  -3  -5   3   72.77    4.60 
  -3  -5   3   76.39    5.20 
  -5   3   3   68.63    5.11 
   5  -4  -3  205.75   13.91 
   5  -4  -3  227.99   13.62 
  -4  -5  -3  207.62   13.96 
  -5   4  -3  200.44   13.76 
  -5   4  -3  225.40   13.84 
   5  -4  -3  229.51   13.67 
   4   5  -3  211.21   14.02 
  -5   4  -3  209.61   13.40 
  -4  -5  -3  222.67   13.85 
  -4  -5  -3  218.61   13.58 
   4   5  -3  233.05   13.84 
   5  -4  -3  223.28   13.90 
   4   5  -3  215.27   14.06 
  -4  -5  -3  228.61   13.82 
  -4  -5  -3  226.29   13.88 
   4   5  -3  222.23   13.45 
  -5   4  -3  219.74   13.91 
  -4  -5  -3  214.74   13.52 
  -4  -5   3  257.92   14.09 
  -5   4   3  239.51   13.98 
  -4  -5   3  249.19   14.08 
  -5   4   3  254.11   13.82 
   4   5   3  253.09   14.01 
  -5   4   3  270.41   14.09 
   5  -4   3  254.89   14.06 
  -4  -5   3  243.60   13.49 
  -5   4   3  244.99   13.68 
   5  -4   3  256.78   13.97 
   4   5   3  251.29   14.10 
   5  -4   3  254.26   13.93 
  -4  -5   3  250.96   13.93 
  -5  -5  -3   50.58    4.23 
   5  -5  -3   52.58    3.93 
  -5   5  -3   50.87    3.46 
  -5  -5  -3   48.41    3.76 
   5  -5  -3   52.68    3.86 
  -5  -5  -3   52.52    3.63 
   5  -5  -3   44.29    3.99 
   5   5  -3   49.53    4.32 
  -5  -5  -3   46.02    3.79 
   5   5  -3   48.58    3.48 
  -5   5  -3   44.84    4.02 
   5  -5  -3   48.54    3.62 
  -5  -5  -3   54.71    3.96 
  -5   5  -3   47.28    3.65 
  -5   5  -3   48.59    3.89 
  -5  -5  -3   53.58    3.62 
  -5   5   3   47.19    4.12 
  -5   5   3   44.57    3.82 
   5   5   3   47.73    4.14 
   5  -5   3   51.87    4.08 
   5  -5   3   52.79    3.41 
   5   5   3   47.88    3.98 
  -5  -5   3   53.82    3.99 
  -5   5   3   54.22    3.74 
   5  -5   3   50.55    4.01 
  -5  -5   3   50.79    3.99 
  -5  -5   3   52.42    3.54 
  -5   5   3   49.22    3.80 
   5  -5   3   54.58    3.86 
  -5  -5   3   51.37    3.94 
   6   5  -3  104.54    7.09 
   5  -6  -3  103.89    7.13 
   5  -6  -3  104.57    7.32 
  -6  -5  -3   95.17    7.14 
  -6  -5  -3  104.20    7.21 
  -5   6  -3   95.34    7.23 
  -5   6  -3  104.02    7.03 
  -6  -5  -3  100.28    7.41 
  -5   6  -3   96.72    7.33 
   5  -6  -3   97.10    7.23 
  -6  -5  -3  102.23    7.02 
  -5   6  -3  111.00    7.01 
   6   5  -3  102.54    7.60 
  -6  -5  -3  105.67    7.63 
  -6  -5   3  115.45    7.45 
  -5   6   3  119.54    7.26 
  -5   6   3  116.06    7.33 
   6   5   3  114.39    7.43 
  -5   6   3  126.93    7.69 
  -6  -5   3  117.27    7.24 
   6   5   3  116.16    7.54 
   5  -6   3  105.64    7.25 
   5  -6   3  120.68    6.87 
  -6  -5   3  117.42    6.99 
   5  -6   3  121.18    7.35 
  -6  -5   3  120.55    7.55 
   5  -6   3  118.69    7.55 
  -5   6   3  115.01    7.26 
  -6  -5   3  118.23    7.14 
  -6  -5   3  110.00    7.49 
  -4   6  -3   93.78    6.79 
   4  -6  -3   95.11    6.74 
  -6  -4  -3   99.15    7.09 
   4  -6  -3   98.38    7.04 
   4  -6  -3   97.85    6.93 
  -6  -4  -3   97.33    6.83 
  -6  -4  -3   97.98    6.90 
  -6  -4  -3  106.86    6.90 
   4  -6  -3  106.54    6.94 
   6   4  -3   99.86    6.98 
   6   4  -3   89.02    7.14 
  -4   6  -3   96.51    7.16 
  -4   6  -3   99.61    6.71 
  -6  -4  -3   99.54    6.92 
  -6  -4   3  111.02    7.16 
  -4   6   3  123.54    7.12 
   4  -6   3  113.99    7.29 
  -6  -4   3  114.51    7.26 
   6   4   3  117.07    7.16 
  -6  -4   3  110.45    6.75 
  -6  -4   3  114.16    6.76 
   4  -6   3  111.13    7.32 
  -6  -4   3  118.30    6.90 
  -6  -4   3  123.38    7.28 
  -4   6   3  115.22    7.31 
   6   4   3  116.71    7.19 
  -4   6   3  112.54    7.10 
  -4   6   3  120.75    6.94 
   4  -6   3  108.91    7.03 
  -6  -3  -3   42.12    3.43 
   3  -6  -3   47.24    3.43 
  -3   6  -3   46.37    3.88 
  -3   6  -3   45.66    3.68 
   6   3  -3   39.28    3.71 
   3  -6  -3   41.91    3.70 
   3  -6  -3   41.87    3.39 
  -6  -3  -3   46.75    3.40 
   3  -6  -3   41.57    3.25 
  -3   6  -3   44.93    3.50 
   6   3  -3   42.85    3.69 
  -3   6  -3   45.00    3.18 
  -6  -3  -3   43.71    3.39 
  -6  -3  -3   50.53    3.55 
  -6  -3   3   45.01    3.69 
  -3   6   3   44.20    3.81 
  -3   6   3   50.53    3.34 
  -3   6   3   49.90    3.65 
   3  -6   3   45.83    3.22 
  -6  -3   3   47.70    3.20 
  -6  -3   3   51.46    3.53 
  -6  -3   3   50.54    4.04 
  -6  -3   3   46.24    3.18 
  -6  -3   3   49.08    3.70 
   3  -6   3   46.91    3.28 
   3  -6   3   40.05    3.82 
  -3   6   3   41.35    3.59 
   6   3   3   48.04    3.67 
   2  -6  -3   85.68    5.45 
  -6  -2  -3   96.51    5.63 
   6   2  -3   85.35    5.94 
   2  -6  -3   86.26    5.69 
  -2   6  -3   83.57    5.30 
  -6  -2  -3   80.03    5.56 
  -2   6  -3   83.38    5.74 
  -2   6  -3   81.35    5.85 
   2  -6  -3   83.35    5.97 
  -6  -2  -3   92.29    5.65 
  -6  -2  -3   87.97    5.72 
  -6  -2  -3   76.12    5.71 
  -2   6  -3   79.99    5.95 
  -6  -2  -3   84.42    5.82 
   2  -6  -3   82.81    5.67 
  -6  -2   3   88.99    5.32 
   2  -6   3   88.50    6.07 
  -6  -2   3   87.15    5.80 
  -2   6   3   94.18    6.02 
   2  -6   3   94.95    5.83 
  -6  -2   3   97.20    5.97 
   2  -6   3   92.65    5.59 
   6   2   3   84.85    5.97 
  -2   6   3   94.44    5.94 
   2  -6   3   88.04    5.34 
  -6  -2   3   80.66    5.70 
  -6  -2   3   85.47    5.34 
  -2   6   3   94.62    5.95 
  -6  -2   3   86.56    6.01 
  -2   6   3   87.42    5.72 
  -6  -1  -3   79.10    5.74 
  -1   6  -3   83.24    5.82 
  -1   6  -3   83.50    5.87 
   1  -6  -3   81.27    5.99 
  -6  -1  -3   84.47    5.45 
   1  -6  -3   83.55    5.67 
   6   1  -3   84.79    5.67 
   1  -6  -3   81.00    5.31 
  -6  -1  -3   81.46    5.76 
   1  -6  -3   87.61    5.68 
  -1   6  -3   85.15    5.16 
  -1   6  -3   83.90    5.17 
  -6  -1  -3   87.86    5.54 
  -6  -1  -3   77.53    5.47 
  -1   6  -3   82.13    5.89 
   6   1  -3   86.48    6.02 
  -6  -1  -3   85.22    5.66 
  -6  -1   3   92.36    6.09 
  -6  -1   3  100.63    5.26 
  -1   6   3   94.53    6.00 
  -1   6   3   88.80    5.91 
   6   1   3   90.11    5.61 
  -1   6   3   96.40    5.95 
   1  -6   3   87.52    6.01 
  -6  -1   3  100.89    5.94 
   1  -6   3   87.76    5.62 
  -1   6   3   95.69    5.42 
  -6  -1   3   93.43    5.84 
   6   1   3   94.32    6.11 
   1  -6   3   96.34    5.81 
  -6  -1   3   79.79    5.74 
  -6   0  -3  197.09   11.60 
   0  -6  -3  206.69   11.92 
   0  -6  -3  201.44   12.22 
   0   6  -3  203.10   12.06 
   0  -6  -3  198.57   11.48 
   0   6  -3  205.56   12.15 
  -6   0  -3  203.07   11.75 
   6   0  -3  193.00   12.19 
   6   0  -3  204.07   11.42 
  -6   0  -3  200.30   11.99 
   6   0  -3  203.84   11.88 
   0  -6  -3  199.74   11.95 
   0   6  -3  189.52   12.12 
  -6   0  -3  196.62   12.07 
   0   6   3  188.77   12.06 
   0   6   3  200.81   12.12 
   6   0   3  198.34   11.76 
   0  -6   3  193.25   12.19 
  -6   0   3  191.62   12.09 
  -6   0   3  207.76   11.43 
   6   0   3  190.11   12.17 
  -6   0   3  207.78   12.11 
   0  -6   3  201.74   11.95 
   0   6   3  200.57   12.05 
   0  -6   3  204.86   12.02 
   0   6   3  204.25   11.53 
  -6   0   3  192.98   11.90 
   6   0   3  201.79   11.98 
   1   6  -3   90.83    6.15 
  -6   1  -3   87.89    5.88 
  -6   1  -3   93.88    5.98 
   1   6  -3   98.57    6.05 
  -1  -6  -3   93.48    6.22 
  -1  -6  -3   92.77    5.30 
   6  -1  -3  100.03    5.31 
   6  -1  -3   91.35    5.92 
  -1  -6  -3   96.72    5.81 
  -6   1  -3   91.55    5.43 
  -1  -6  -3   99.50    5.94 
   6  -1  -3   92.45    6.21 
  -6   1  -3   99.30    5.70 
   6  -1  -3   89.98    5.68 
   1   6  -3   95.63    6.13 
  -6   1   3   77.89    5.81 
  -1  -6   3   81.77    5.75 
  -6   1   3   76.44    5.27 
   6  -1   3   89.06    5.62 
   1   6   3   84.46    5.92 
   1   6   3   85.87    5.29 
   1   6   3   81.63    5.90 
  -1  -6   3   86.75    6.10 
  -6   1   3   82.81    5.95 
  -6   1   3   80.43    5.72 
   6  -1   3   83.53    5.75 
   1   6   3   85.44    6.06 
   6  -1   3   84.79    5.41 
  -1  -6   3   86.54    5.84 
   6  -2  -3   88.69    5.93 
   2   6  -3   88.13    6.22 
  -2  -6  -3   90.58    5.85 
  -6   2  -3   91.94    6.04 
  -6   2  -3   85.27    5.43 
   6  -2  -3   93.17    6.32 
  -2  -6  -3   90.13    5.94 
  -6   2  -3   95.26    6.05 
  -2  -6  -3   93.07    5.44 
   6  -2  -3   94.30    5.43 
   6  -2  -3   90.68    5.72 
  -2  -6  -3   93.34    6.30 
   2   6  -3   91.60    6.05 
  -6   2  -3   87.92    5.75 
   2   6  -3   91.69    6.18 
  -6   2   3   99.92    6.07 
  -6   2   3   85.16    6.09 
   6  -2   3   82.37    6.15 
  -2  -6   3   84.28    5.89 
   2   6   3   92.05    6.12 
  -2  -6   3   89.86    6.13 
  -6   2   3   90.83    5.48 
   2   6   3   81.65    6.08 
   6  -2   3   85.65    5.83 
   2   6   3   87.95    6.02 
  -6   2   3   87.44    5.85 
  -2  -6   3   91.49    5.99 
   6  -2   3   88.24    5.44 
   3   6  -3   48.77    4.06 
  -6   3  -3   39.92    3.05 
  -3  -6  -3   46.62    3.08 
   3   6  -3   45.23    3.96 
   6  -3  -3   46.87    3.35 
  -3  -6  -3   44.63    3.97 
   6  -3  -3   45.30    4.03 
   3   6  -3   51.45    2.89 
  -6   3  -3   48.63    3.70 
  -3  -6  -3   45.91    3.49 
  -3  -6  -3   48.48    4.10 
   6  -3  -3   46.87    3.17 
  -3  -6  -3   46.84    3.14 
  -6   3  -3   47.89    3.49 
  -6   3  -3   46.03    3.77 
   3   6  -3   53.81    3.81 
  -6   3   3   45.99    3.63 
  -6   3   3   46.56    3.87 
   3   6   3   46.70    3.94 
   6  -3   3   47.90    3.96 
  -3  -6   3   50.16    4.01 
  -3  -6   3   43.94    4.01 
  -3  -6   3   47.49    2.87 
  -6   3   3   43.74    3.65 
   6  -3   3   42.81    3.52 
   3   6   3   44.60    3.74 
   6  -3   3   40.53    3.18 
   6  -3   3   48.17    3.61 
  -4  -6  -3  117.04    7.26 
   4   6  -3  124.62    7.70 
  -6   4  -3  113.40    7.20 
   6  -4  -3  115.28    7.01 
  -6   4  -3  111.71    7.32 
   6  -4  -3  113.75    6.89 
   4   6  -3  126.57    7.32 
   4   6  -3  111.37    7.59 
   4   6  -3  125.18    6.67 
  -4  -6  -3  116.09    6.84 
  -4  -6  -3  109.40    7.52 
   6  -4  -3  125.52    7.67 
  -4  -6  -3  121.21    7.21 
  -4  -6  -3  112.94    6.99 
  -4  -6  -3  124.26    7.38 
  -6   4  -3  117.80    6.74 
   6  -4  -3  127.90    7.40 
   4   6   3   97.05    7.40 
  -4  -6   3  104.69    7.25 
   4   6   3   95.33    7.26 
  -6   4   3  103.07    7.40 
  -4  -6   3   97.11    7.22 
   6  -4   3   93.15    6.60 
  -6   4   3   97.03    6.84 
   6  -4   3  108.55    7.44 
  -6   4   3  108.46    7.12 
  -4  -6   3  103.34    7.20 
   6  -4   3   98.09    7.14 
   6  -4   3   98.71    7.08 
  -4  -6   3  101.38    6.57 
   6  -5  -3  121.33    7.74 
  -5  -6  -3  125.61    7.50 
   5   6  -3  120.23    7.86 
   6  -5  -3  121.48    7.26 
  -6   5  -3  121.94    7.72 
  -5  -6  -3  116.49    6.99 
  -6   5  -3  108.89    8.47 
  -5  -6  -3  115.64    7.72 
   5   6  -3  117.04    7.36 
   5   6  -3  111.67    6.84 
   6  -5  -3  118.46    7.15 
  -5  -6  -3  118.44    7.43 
  -6   5  -3  124.97    7.93 
  -6   5  -3  120.18    6.93 
  -5  -6  -3  117.78    7.06 
   6  -5  -3  114.59    7.43 
   6  -5   3  101.56    7.23 
  -5  -6   3  103.99    7.36 
  -6   5   3  103.98    7.53 
  -6   5   3  109.84    7.39 
  -5  -6   3  102.79    6.81 
  -6   5   3   99.33    7.23 
  -5  -6   3  105.91    7.37 
   6  -5   3  107.62    6.80 
   5   6   3  107.40    7.52 
   6  -5   3  103.45    7.38 
  -5  -6   3  100.52    7.33 
  -6   5   3  105.57    7.09 
   6  -5   3   96.63    7.40 
   5   6   3  105.26    7.68 
   6  -6  -3    7.68    1.87 
  -6  -6  -3    8.15    1.62 
   6  -6  -3    6.82    1.70 
  -6   6  -3    8.48    2.18 
   6  -6  -3    5.83    1.36 
  -6  -6  -3    6.85    1.67 
  -6  -6  -3    6.47    1.89 
   6  -6  -3    7.07    1.28 
  -6   6  -3    8.75    1.52 
  -6  -6  -3    6.43    1.32 
  -6   6  -3    7.60    1.61 
  -6  -6  -3    5.91    1.56 
  -6   6  -3    7.02    1.68 
  -6  -6  -3    8.82    1.72 
   6   6  -3    6.87    2.25 
  -6   6   3   10.16    1.67 
  -6  -6   3    9.84    1.60 
   6  -6   3    7.21    1.46 
  -6   6   3    7.33    2.00 
   6  -6   3   10.26    2.09 
   6  -6   3    5.92    1.84 
   6   6   3    6.70    2.03 
   6  -6   3    5.99    1.16 
  -6   6   3    5.11    1.48 
  -6  -6   3    6.55    1.75 
  -6  -6   3   13.36    2.16 
  -6   6   3    7.86    1.88 
   6   6   3    6.65    2.06 
  -6   7  -3   24.48    3.56 
   6  -7  -3   20.19    2.65 
  -7  -6  -3   32.45    3.23 
   7   6  -3   27.13    2.96 
  -7  -6  -3   23.98    3.57 
   6  -7  -3   27.45    3.35 
  -6   7  -3   28.14    2.82 
  -6   7  -3   28.30    3.03 
   6  -7  -3   25.03    3.37 
  -6   7  -3   24.68    3.37 
  -7  -6  -3   23.86    3.23 
  -7  -6  -3   29.45    2.82 
  -7  -6  -3   19.49    3.14 
  -7  -6  -3   27.38    3.21 
   7   6  -3   27.03    3.75 
  -7  -6   3   28.57    3.43 
   6  -7   3   30.51    2.52 
   7   6   3   30.07    3.78 
  -6   7   3   24.60    3.33 
  -7  -6   3   28.18    2.62 
   6  -7   3   27.68    3.40 
  -6   7   3   30.60    3.64 
  -6   7   3   22.89    3.10 
   7   6   3   26.08    3.42 
   6  -7   3   25.21    3.52 
  -6   7   3   30.16    2.96 
  -7  -6   3   25.38    3.26 
  -5   7  -3   67.04    5.40 
  -7  -5  -3   67.01    4.80 
  -5   7  -3   71.42    4.77 
  -7  -5  -3   67.28    5.06 
   7   5  -3   63.32    5.44 
  -5   7  -3   64.80    5.09 
  -5   7  -3   69.57    4.90 
  -7  -5  -3   66.98    4.97 
   5  -7  -3   73.34    5.32 
   5  -7  -3   62.93    5.11 
  -7  -5  -3   71.10    4.97 
   7   5  -3   68.63    5.08 
   5  -7  -3   68.37    4.75 
   5  -7  -3   66.34    4.91 
  -7  -5  -3   72.33    5.36 
   5  -7   3   55.62    4.75 
  -5   7   3   70.35    4.78 
  -7  -5   3   56.57    5.06 
  -5   7   3   60.75    4.96 
  -7  -5   3   62.05    4.90 
   5  -7   3   64.32    4.99 
  -7  -5   3   63.57    4.63 
   7   5   3   61.45    5.20 
  -7  -5   3   66.18    5.38 
   5  -7   3   61.76    5.20 
  -7  -5   3   66.28    4.70 
   5  -7   3   66.36    4.52 
  -7  -5   3   62.39    4.90 
  -5   7   3   61.43    5.32 
  -5   7   3   68.05    5.10 
  -4   7  -3   31.30    2.97 
  -4   7  -3   27.53    3.13 
   4  -7  -3   33.35    2.98 
  -7  -4  -3   28.47    2.93 
  -7  -4  -3   31.35    2.98 
   4  -7  -3   30.62    3.42 
  -7  -4  -3   33.84    3.00 
  -4   7  -3   26.97    2.50 
  -4   7  -3   26.18    3.46 
  -7  -4  -3   30.08    2.86 
   7   4  -3   39.34    3.34 
   7   4  -3   29.68    3.29 
   4  -7  -3   28.36    2.65 
   4  -7  -3   31.78    3.09 
   3  -7  -3   49.51    3.49 
  -3   7  -3   46.36    4.11 
   3  -7  -3   48.49    3.54 
  -3   7  -3   45.03    3.63 
  -7  -3  -3   41.37    3.47 
   7   3  -3   51.40    4.04 
  -7  -3  -3   53.01    3.54 
   3  -7  -3   46.22    3.23 
   3  -7  -3   43.47    3.89 
  -3   7  -3   46.54    3.68 
  -7  -3  -3   51.12    3.55 
  -3   7  -3   49.37    3.13 
  -7  -3  -3   45.96    3.63 
  -7  -3  -3   43.60    3.81 
  -7  -3   3   37.40    3.59 
   3  -7   3   39.13    3.05 
   7   3   3   35.61    3.79 
  -3   7   3   35.51    3.59 
  -7  -3   3   39.97    3.45 
  -3   7   3   42.21    3.79 
  -7  -3   3   39.56    3.05 
   7   3   3   40.51    3.65 
  -7  -3   3   39.51    3.61 
   3  -7   3   41.20    3.99 
  -7  -3   3   35.83    3.62 
  -7  -3   3   44.16    3.08 
   3  -7   3   39.79    3.22 
  -3   7   3   34.55    3.06 
   3  -7   3   36.43    3.30 
  -3   7   3   41.14    3.69 
  -2   7  -3   88.37    6.33 
  -7  -2  -3   99.64    6.12 
  -2   7  -3   80.67    6.45 
   2  -7  -3   90.88    6.20 
   2  -7  -3   91.25    6.25 
  -7  -2  -3   85.39    6.21 
  -7  -2  -3   86.09    6.35 
  -7  -2  -3   85.04    6.10 
  -7  -2  -3   85.30    6.14 
   2  -7  -3   84.28    6.59 
   2  -7  -3   90.38    5.90 
  -2   7  -3   89.10    6.48 
   7   2  -3   95.98    6.64 
  -2   7  -3   87.49    5.72 
   2  -7   3  101.84    6.78 
   7   2   3  100.12    6.33 
  -7  -2   3  104.17    5.90 
  -7  -2   3  102.30    6.76 
   7   2   3   99.42    6.73 
  -2   7   3  102.28    6.55 
   2  -7   3  103.09    6.43 
  -2   7   3  101.21    6.62 
  -7  -2   3   82.21    6.29 
  -2   7   3   98.24    6.63 
  -7  -2   3  108.68    6.53 
  -7  -2   3  110.80    5.86 
  -7  -2   3  102.61    6.50 
  -2   7   3   98.97    5.93 
  -7  -1  -3  119.08    8.14 
   7   1  -3  116.86    8.13 
  -1   7  -3  109.62    8.35 
  -1   7  -3  121.34    8.32 
   1  -7  -3  129.21    8.17 
   1  -7  -3  116.25    8.44 
   1  -7  -3  126.37    7.70 
  -1   7  -3  127.54    7.50 
   1  -7  -3  124.00    8.55 
  -1   7  -3  121.77    8.33 
   7   1  -3  121.30    8.56 
  -7  -1  -3  122.21    8.26 
  -7  -1  -3  132.92    8.42 
  -1   7  -3  122.91    7.48 
  -7  -1  -3  120.97    7.96 
  -7  -1  -3  129.67    7.98 
  -7  -1  -3  107.65    8.09 
  -1   7   3  135.77    8.49 
  -1   7   3  142.65    7.79 
   1  -7   3  132.12    8.14 
  -7  -1   3  149.09    7.68 
   1  -7   3  134.70    8.25 
  -7  -1   3  146.39    8.42 
  -1   7   3  140.82    8.57 
  -7  -1   3  137.25    8.27 
  -1   7   3  144.66    8.49 
   7   1   3  136.47    8.68 
  -7  -1   3  141.47    8.57 
   1  -7   3  147.86    8.69 
   7   1   3  139.53    8.17 
  -7   0  -3  111.72    7.87 
   0  -7  -3  123.29    7.22 
   0   7  -3  122.40    8.13 
  -7   0  -3  125.28    7.92 
   0  -7  -3  116.28    8.17 
   7   0  -3  123.03    7.69 
   7   0  -3  140.02    8.35 
  -7   0  -3  126.54    7.58 
   0  -7  -3  134.99    7.88 
   0  -7  -3  124.41    7.77 
   7   0  -3  109.36    7.16 
  -7   0  -3  122.10    7.43 
   0   7  -3  123.73    8.01 
   0   7   3  119.02    8.01 
  -7   0   3  129.60    7.97 
   0  -7   3  124.51    7.79 
   0   7   3  125.37    7.24 
  -7   0   3  118.58    7.74 
  -7   0   3  132.90    7.24 
   0   7   3  109.45    7.86 
   7   0   3  129.46    8.25 
   0   7   3  120.48    8.06 
  -7   0   3  122.04    8.08 
   7   0   3  110.18    7.91 
   0  -7   3  123.21    7.88 
   0  -7   3  118.64    8.13 
   7  -1  -3  145.27    7.92 
  -7   1  -3  141.52    8.09 
   7  -1  -3  147.36    8.71 
  -1  -7  -3  143.15    8.50 
  -1  -7  -3  141.43    8.95 
   1   7  -3  148.60    8.97 
  -1  -7  -3  157.38    8.73 
   1   7  -3  153.96    8.83 
   7  -1  -3  143.09    8.37 
  -7   1  -3  147.02    8.35 
   7  -1  -3  142.79    8.99 
  -7   1  -3  144.91    8.70 
   1   7  -3  142.76    8.83 
  -7   1  -3  143.76    8.71 
  -1  -7  -3  143.21    7.85 
   7  -1   3  120.77    8.74 
   7  -1   3  130.00    8.07 
  -7   1   3  140.05    8.74 
   1   7   3  110.65    8.50 
  -7   1   3  117.77    8.61 
   1   7   3  124.78    7.82 
   1   7   3  118.02    8.70 
  -7   1   3  123.47    7.90 
  -7   1   3  125.33    8.39 
  -1  -7   3  129.55    8.53 
  -1  -7   3  127.73    8.86 
   7  -1   3  122.46    8.29 
   7  -1   3  122.94    8.42 
   1   7   3  116.97    8.54 
  -2  -7  -3  107.40    5.75 
  -2  -7  -3  102.66    6.47 
   2   7  -3  101.79    6.82 
  -2  -7  -3  102.61    5.75 
  -7   2  -3   98.54    5.92 
   7  -2  -3  109.80    5.86 
   2   7  -3   99.33    6.60 
  -7   2  -3  107.92    6.33 
  -7   2  -3  106.29    6.67 
  -2  -7  -3  102.44    6.90 
   7  -2  -3   92.17    6.83 
  -2  -7  -3  109.62    6.48 
  -7   2  -3  103.46    6.61 
   2   7  -3   95.76    6.76 
   7  -2  -3  109.14    6.29 
   7  -2  -3  102.77    6.50 
  -2  -7   3   84.44    6.38 
   7  -2   3   83.93    5.84 
   7  -2   3   89.46    6.22 
  -2  -7   3   90.63    6.70 
  -2  -7   3   90.70    6.40 
  -7   2   3   78.68    6.55 
   2   7   3   81.59    6.45 
   2   7   3   85.71    6.61 
  -7   2   3   82.02    6.35 
  -7   2   3   95.63    5.88 
   2   7   3   87.69    6.55 
  -7   2   3   85.71    6.27 
  -7   3  -3   40.00    3.85 
  -3  -7  -3   35.87    3.87 
  -3  -7  -3   37.10    3.33 
   7  -3  -3   33.57    3.91 
  -3  -7  -3   40.26    2.86 
   3   7  -3   42.57    3.62 
   7  -3  -3   40.91    3.47 
  -3  -7  -3   41.39    2.82 
  -7   3  -3   36.24    2.89 
  -7   3  -3   36.84    3.43 
  -3  -7  -3   42.04    3.70 
   3   7  -3   40.67    3.97 
   3   7  -3   39.83    4.06 
   7  -3  -3   39.29    2.93 
   7  -3  -3   41.65    3.21 
  -7   3  -3   40.44    3.38 
  -3  -7   3   43.28    3.49 
   7  -3   3   46.89    2.97 
   3   7   3   45.75    3.89 
   7  -3   3   45.26    4.08 
  -7   3   3   43.61    3.80 
   7  -3   3   48.92    3.59 
  -7   3   3   47.08    3.70 
   7  -3   3   46.40    3.51 
  -7   3   3   48.53    3.15 
  -3  -7   3   43.06    4.00 
  -3  -7   3   46.28    3.76 
   3   7   3   42.89    3.92 
  -7   3   3   45.50    3.58 
   4   7   3   30.40    3.57 
  -4  -7   3   30.15    3.46 
  -7   4   3   28.44    3.25 
   7  -4   3   30.58    2.91 
  -4  -7   3   31.31    2.13 
   4   7   3   30.65    3.35 
   7  -4   3   29.67    3.51 
  -7   4   3   26.64    2.55 
   7  -4   3   36.01    3.11 
  -7   4   3   29.30    3.04 
  -7   4   3   30.18    3.09 
  -4  -7   3   31.84    2.99 
  -4  -7   3   27.78    3.01 
   7  -4   3   33.08    2.38 
  -5  -7  -3   66.33    5.02 
  -7   5  -3   65.67    5.39 
  -7   5  -3   61.72    4.93 
  -5  -7  -3   76.22    5.29 
  -7   5  -3   71.40    5.05 
   7  -5  -3   68.41    4.87 
   7  -5  -3   66.17    4.75 
  -5  -7  -3   69.46    4.56 
   5   7  -3   67.59    4.37 
  -5  -7  -3   62.58    4.49 
   5   7  -3   60.53    5.64 
   5   7  -3   66.65    5.73 
   7  -5  -3   70.62    5.39 
  -5  -7  -3   66.24    5.62 
   7  -5  -3   66.60    5.48 
   5   7  -3   65.11    5.09 
  -7   5  -3   61.28    5.11 
  -5  -7  -3   66.36    4.99 
  -7   5   3   70.95    5.45 
   7  -5   3   64.31    4.45 
  -7   5   3   64.17    5.05 
  -5  -7   3   59.81    4.90 
  -7   5   3   73.77    5.18 
   7  -5   3   65.91    5.20 
  -7   5   3   69.56    4.80 
   7  -5   3   75.01    5.54 
   5   7   3   70.97    5.74 
  -5  -7   3   70.63    5.38 
  -5  -7   3   71.44    5.36 
   5   7   3   67.53    5.48 
  -5  -7   3   77.90    5.36 
   7  -5   3   71.26    5.12 
   7  -6  -3   23.88    3.55 
  -7   6  -3   35.92    3.52 
   6   7  -3   27.38    3.91 
  -6  -7  -3   29.23    3.17 
  -6  -7  -3   27.35    2.61 
   6   7  -3   32.08    2.46 
   7  -6  -3   27.11    2.76 
  -7   6  -3   28.68    2.90 
  -6  -7  -3   26.43    3.64 
  -7   6  -3   22.31    2.89 
   7  -6  -3   25.82    3.16 
  -6  -7  -3   32.94    3.09 
  -6  -7  -3   27.38    3.21 
  -7   6  -3   32.00    3.88 
  -7   6   3   19.26    3.49 
   7  -6   3   28.51    2.40 
  -7   6   3   28.18    3.17 
   7  -6   3   31.85    3.63 
   6   7   3   22.78    3.57 
  -7   6   3   23.40    3.16 
  -7   6   3   26.64    2.87 
   6   7   3   27.11    3.80 
  -6  -7   3   24.89    3.44 
  -6  -7   3   25.66    2.41 
   7  -6   3   23.98    3.33 
  -7   7  -3   17.94    2.99 
  -7   7  -3   14.97    2.29 
   7  -7  -3   17.81    2.56 
  -7  -7  -3   20.01    3.32 
   7  -7  -3   14.49    2.22 
   7   7  -3   17.57    3.28 
   7  -7  -3   14.34    2.78 
  -7  -7  -3   12.88    2.56 
  -7  -7  -3   13.55    2.00 
  -7   7  -3   15.69    2.61 
  -7  -7  -3   14.89    2.34 
   7   7  -3   15.08    2.61 
  -7   7  -3   12.39    2.06 
   7  -7   3   19.09    2.09 
   7   7   3   18.77    3.14 
   7  -7   3   13.38    2.49 
  -7  -7   3   18.08    2.86 
  -7  -7   3   15.13    2.54 
  -7  -7   3   20.20    3.29 
  -7   7   3   15.11    2.60 
  -7  -7   3   15.30    2.18 
   7   7   3   14.35    2.66 
  -7   7   3   17.18    2.77 
   7  -7   3   17.38    2.89 
  -7   7   3   16.43    3.09 
  -7   7   3   16.47    2.69 
  -8  -7  -3   11.09    2.37 
  -7   8  -3   10.67    1.99 
  -8  -7  -3    8.20    2.56 
  -8  -7  -3   10.55    1.90 
   8   7  -3    8.28    2.13 
   7  -8  -3   11.73    2.69 
   7  -8  -3    7.78    2.21 
   8   7  -3   12.21    2.89 
  -7   8  -3    8.08    2.25 
  -7   8  -3    7.30    2.58 
   8   7   3   11.69    2.64 
  -7   8   3   10.26    2.28 
   7  -8   3   12.87    2.64 
  -7   8   3   12.12    2.97 
   7  -8   3    8.74    2.48 
   7  -8   3   12.98    1.74 
  -7   8   3   14.63    2.77 
  -8  -7   3   13.67    2.12 
  -8  -7   3   13.89    3.09 
  -8  -7   3   10.37    2.28 
  -6   8  -3   25.12    2.77 
  -8  -6  -3   30.34    3.32 
  -6   8  -3   21.96    3.22 
  -6   8  -3   23.50    3.51 
   6  -8  -3   25.08    2.77 
   8   6  -3   23.58    3.84 
  -8  -6  -3   21.82    3.52 
   6  -8  -3   22.09    3.66 
   8   6  -3   28.75    3.47 
  -8  -6  -3   26.91    3.87 
  -8  -6  -3   23.58    2.86 
   6  -8  -3   27.32    3.65 
  -8  -6   3   19.49    3.23 
  -6   8   3   26.85    3.45 
   8   6   3   26.15    3.46 
  -6   8   3   26.91    2.88 
  -6   8   3   18.34    3.24 
  -8  -6   3   29.60    2.85 
  -8  -6   3   20.87    3.44 
  -8  -6   3   16.83    2.75 
  -6   8   3   20.56    3.40 
   6  -8   3   20.61    2.45 
   6  -8   3   22.68    3.52 
  -5   8  -3   45.14    4.62 
  -8  -5  -3   45.80    4.37 
   8   5  -3   45.93    4.58 
   5  -8  -3   41.40    4.40 
   8   5  -3   39.15    4.09 
   5  -8  -3   44.89    4.11 
  -8  -5  -3   44.83    4.16 
  -8  -5  -3   45.79    3.95 
   5  -8  -3   47.23    3.66 
  -5   8  -3   44.40    3.49 
  -8  -5  -3   41.13    3.97 
  -8  -5  -3   46.04    4.35 
  -8  -5  -3   39.27    3.85 
  -5   8  -3   40.29    3.94 
  -8  -5   3   44.14    3.60 
  -5   8   3   43.51    4.23 
   5  -8   3   41.30    3.91 
  -8  -5   3   41.88    3.71 
  -8  -5   3   44.28    4.44 
  -5   8   3   40.14    4.23 
  -8  -5   3   37.34    3.82 
   5  -8   3   37.52    3.41 
   5  -8   3   45.29    4.43 
  -5   8   3   45.21    4.30 
  -4   8  -3   79.70    5.05 
   4  -8  -3   73.99    5.33 
   4  -8  -3   78.83    6.01 
  -4   8  -3   78.57    6.06 
   4  -8  -3   74.74    5.41 
  -8  -4  -3   88.36    5.74 
  -8  -4  -3   77.86    5.68 
  -4   8  -3   72.75    5.80 
  -8  -4  -3   80.52    5.36 
   8   4  -3   77.00    5.84 
  -8  -4  -3   78.31    5.63 
  -8  -4  -3   82.15    5.62 
  -8  -4  -3   79.86    5.86 
  -4   8  -3   73.87    5.57 
  -4   8   3   73.76    5.74 
  -4   8   3   66.06    5.05 
   8   4   3   68.76    5.81 
  -8  -4   3   70.12    5.46 
  -8  -4   3   75.69    5.03 
  -8  -4   3   70.61    5.68 
   4  -8   3   72.75    5.99 
   4  -8   3   74.26    5.27 
  -8  -4   3   70.57    5.28 
  -8  -4   3   73.27    5.69 
   4  -8   3   70.57    5.15 
  -4   8   3   72.86    5.94 
  -4   8   3   70.14    5.63 
   3  -8  -3  116.70    8.04 
  -3   8  -3  111.07    7.82 
  -8  -3  -3  125.22    7.42 
   3  -8  -3  118.97    7.47 
   3  -8  -3  119.42    7.54 
  -8  -3  -3  128.86    7.96 
  -8  -3  -3  112.42    7.65 
  -3   8  -3  122.90    7.76 
  -3   8  -3  129.24    7.10 
   8   3  -3  113.24    7.99 
  -8  -3  -3  111.34    7.57 
  -8  -3  -3  118.79    7.63 
  -3   8  -3  129.34    8.19 
   3  -8   3  113.49    7.06 
  -3   8   3  107.83    7.17 
   3  -8   3  115.31    7.40 
  -8  -3   3  121.88    7.66 
   8   3   3  112.44    7.95 
   8   3   3  112.63    7.62 
   3  -8   3   97.18    7.42 
  -3   8   3  114.95    7.96 
  -8  -3   3  111.18    7.76 
  -8  -3   3  107.95    7.67 
  -3   8   3  107.87    7.85 
  -8  -3   3  113.98    8.07 
   3  -8   3  106.57    8.00 
  -8  -3   3  108.24    7.01 
  -8  -3   3  107.71    7.60 
  -8  -3   3  107.19    7.06 
  -3   8   3  106.76    7.73 
  -8  -2  -3   95.68    6.40 
  -8  -2  -3   95.62    6.43 
   2  -8  -3   89.71    5.93 
  -2   8  -3   87.68    6.57 
  -8  -2  -3  102.37    6.29 
   2  -8  -3   99.11    6.50 
  -2   8  -3   94.31    5.80 
  -2   8  -3   95.44    5.81 
  -8  -2  -3   96.45    6.54 
  -8  -2  -3   90.92    6.70 
   2  -8  -3   95.09    7.07 
  -2   8  -3   85.52    6.63 
  -2   8  -3   97.01    6.88 
   2  -8  -3  101.40    6.51 
   8   2  -3   97.36    6.96 
  -8  -2  -3   93.51    6.59 
  -2   8   3  106.99    6.91 
  -8  -2   3  100.61    6.68 
  -8  -2   3   84.26    6.57 
   2  -8   3   92.98    6.96 
   2  -8   3   96.72    6.35 
  -8  -2   3   97.75    7.01 
  -2   8   3   99.18    6.02 
  -8  -2   3  101.21    5.94 
  -8  -2   3   96.20    5.97 
  -2   8   3   90.25    6.71 
  -2   8   3   95.20    6.88 
   8   2   3   99.15    7.03 
  -8  -2   3   96.64    6.67 
   8   2   3  109.74    6.58 
   2  -8   3   85.56    6.37 
   8   1  -3  140.08    9.37 
  -1   8  -3  146.10    9.63 
  -1   8  -3  147.99    8.54 
   1  -8  -3  143.92    8.80 
  -1   8  -3  139.86    8.52 
   1  -8  -3  144.72    9.39 
  -8  -1  -3  139.65    9.16 
   1  -8  -3  140.38    9.83 
  -8  -1  -3  139.97    9.55 
  -1   8  -3  135.37    9.71 
   1  -8  -3  138.79    9.39 
  -8  -1  -3  136.81    9.16 
  -8  -1  -3  135.42    9.37 
   8   1  -3  148.63    9.93 
  -8  -1  -3  144.37    9.14 
  -8  -1  -3  151.70    9.64 
  -1   8   3  157.91    9.83 
  -8  -1   3  156.76    9.66 
  -1   8   3  156.69    8.88 
   1  -8   3  155.25    9.59 
  -8  -1   3  160.92    8.83 
   8   1   3  170.74   10.05 
  -1   8   3  160.04    9.80 
  -8  -1   3  150.85    9.52 
   1  -8   3  158.27    9.41 
   8   1   3  159.35    9.36 
  -1   8   3  157.16    9.73 
   1  -8   3  156.48    9.92 
  -8  -1   3  157.85    9.55 
  -8  -1   3  158.17    9.82 
  -8   0  -3  158.38   10.12 
   0  -8  -3  173.21   10.46 
  -8   0  -3  162.53   10.15 
  -8   0  -3  167.23   10.18 
   0  -8  -3  174.43   11.01 
   0   8  -3  158.68   10.64 
   0   8  -3  172.48   10.88 
   8   0  -3  179.70   11.02 
  -8   0  -3  170.31   10.63 
   0  -8  -3  168.36   10.46 
  -8   0  -3  176.74   10.71 
   0   8  -3  161.78   10.71 
   0  -8  -3  160.84    9.68 
   8   0  -3  176.45    9.81 
   0   8   3  171.12   10.72 
   0   8   3  168.84   10.71 
   0  -8   3  163.09   10.42 
  -8   0   3  159.60   10.55 
  -8   0   3  177.44    9.82 
   8   0   3  173.10   10.30 
   0   8   3  161.94   10.78 
  -8   0   3  173.52   10.45 
   0   8   3  165.20    9.72 
   0  -8   3  153.49   10.76 
  -8   0   3  179.64   10.86 
   8   0   3  156.54   10.85 
   0  -8   3  163.43   10.48 
   1   8  -3  164.92   10.03 
  -1  -8  -3  162.54    8.70 
  -8   1  -3  146.74    9.11 
  -8   1  -3  149.26    9.65 
  -1  -8  -3  161.60   10.10 
  -8   1  -3  164.20    9.34 
  -1  -8  -3  151.05    9.61 
   8  -1  -3  160.94    9.47 
  -8   1  -3  152.80    9.72 
   8  -1  -3  158.23    9.71 
  -1  -8  -3  151.45    9.51 
   1   8  -3  153.28    9.77 
   8  -1  -3  162.38    8.86 
   1   8  -3  150.14    9.89 
   8  -1  -3  160.58   10.14 
  -8   1   3  130.18    9.58 
  -8   1   3  144.36    8.88 
  -8   1   3  140.75    9.42 
  -1  -8   3  160.78    9.63 
  -8   1   3  139.41    9.78 
   8  -1   3  148.36    9.11 
   8  -1   3  145.28    9.31 
  -1  -8   3  154.96   10.02 
   1   8   3  147.42    8.69 
   8  -1   3  136.43    9.46 
   1   8   3  142.91    9.74 
  -1  -8   3  150.98    9.60 
   1   8   3  131.73    9.58 
   1   8   3  146.03    9.92 
   8  -2  -3   98.41    7.14 
  -2  -8  -3   96.41    7.03 
  -2  -8  -3   95.60    6.41 
  -2  -8  -3   95.76    5.55 
  -2  -8  -3  100.05    5.56 
   2   8  -3   91.82    6.61 
  -8   2  -3   93.05    6.61 
  -8   2  -3   85.30    6.49 
   8  -2  -3   95.57    6.53 
   8  -2  -3   93.33    6.58 
   8  -2  -3  103.29    5.79 
  -8   2  -3   99.11    5.95 
   2   8  -3   91.60    6.87 
  -2  -8  -3   93.86    6.49 
  -8   2  -3  100.60    6.27 
   2   8  -3   92.21    6.90 
   8  -2   3   96.14    6.30 
  -2  -8   3   94.86    6.52 
  -8   2   3   94.12    6.61 
   2   8   3   90.81    6.78 
  -2  -8   3   88.09    6.79 
   2   8   3   90.48    6.65 
   2   8   3   93.04    6.95 
   8  -2   3   79.19    6.80 
   8  -2   3   87.45    6.42 
  -8   2   3   95.23    6.44 
   8  -2   3   97.08    5.93 
  -2  -8   3   94.22    6.56 
  -8   2   3   94.36    6.76 
  -3  -8  -3  109.61    6.71 
  -8   3  -3  101.02    7.62 
   8  -3  -3  110.34    7.56 
  -8   3  -3  105.43    7.62 
  -3  -8  -3  110.76    7.52 
  -8   3  -3  111.51    7.37 
   3   8  -3  105.84    8.05 
  -8   3  -3  109.89    7.01 
   8  -3  -3  111.83    8.14 
  -3  -8  -3  111.63    6.69 
   3   8  -3  109.53    7.73 
   3   8  -3  106.33    7.92 
  -3  -8  -3  106.61    7.94 
  -3  -8  -3   95.90    7.44 
   8  -3  -3  111.42    6.89 
  -8   3   3  115.26    7.74 
   8  -3   3  121.67    7.63 
  -3  -8   3  116.11    7.59 
  -8   3   3  113.65    7.90 
   8  -3   3  128.04    8.24 
   3   8   3  115.62    7.94 
  -3  -8   3  110.65    7.57 
  -3  -8   3  122.54    8.05 
  -8   3   3  120.38    7.04 
   3   8   3  124.47    8.03 
   8  -3   3  121.49    7.01 
   8  -3   3  125.03    7.49 
  -8   3   3  119.84    7.57 
  -4  -8  -3   75.00    4.80 
  -4  -8  -3   74.05    4.74 
  -4  -8  -3   73.53    5.47 
  -4  -8  -3   66.20    6.06 
   4   8  -3   80.63    5.71 
   4   8  -3   66.58    6.11 
  -8   4  -3   74.99    5.59 
   4   8  -3   67.71    6.03 
   8  -4  -3   73.90    6.15 
  -8   4  -3   68.05    5.30 
  -8   4  -3   73.63    5.91 
   8  -4  -3   73.56    5.19 
  -8   4  -3   69.55    5.81 
  -4  -8   3   75.12    5.99 
  -8   4   3   79.34    5.94 
  -4  -8   3   75.37    4.41 
  -4  -8   3   77.46    4.43 
   8  -4   3   75.64    4.89 
   4   8   3   83.36    6.02 
  -8   4   3   78.53    5.08 
   8  -4   3   87.12    6.22 
   8  -4   3   82.91    5.55 
  -8   4   3   76.31    5.53 
   4   8   3   76.91    6.16 
  -5  -8  -3   41.07    3.20 
  -5  -8  -3   38.37    4.04 
   5   8  -3   43.03    4.70 
   5   8  -3   42.14    4.06 
   8  -5  -3   42.38    3.70 
  -5  -8  -3   43.15    3.23 
  -5  -8  -3   43.50    4.65 
   8  -5  -3   41.14    4.61 
   5   8  -3   46.69    4.82 
   8  -5  -3   43.86    3.64 
  -8   5  -3   39.98    4.51 
  -8   5  -3   44.28    4.13 
  -8   5  -3   47.43    3.64 
  -8   5   3   39.19    3.52 
   5   8   3   44.27    4.75 
   5   8   3   44.97    4.50 
  -8   5   3   46.26    4.03 
   8  -5   3   45.17    3.27 
   8  -5   3   44.75    4.00 
  -8   5   3   50.48    4.41 
   8  -5   3   44.37    4.53 
  -5  -8   3   42.57    4.44 
  -5  -8   3   41.91    2.96 
  -5  -8   3   41.74    2.93 
  -6  -8  -3   21.80    3.41 
   8  -6  -3   25.56    3.95 
  -8   6  -3   17.71    2.82 
  -8   6  -3   20.66    3.56 
  -6  -8  -3   21.97    2.38 
  -8   6  -3   23.97    3.41 
   8  -6  -3   15.94    2.31 
  -6  -8  -3   22.18    2.75 
   6   8  -3   23.99    4.07 
   8  -6  -3   20.13    3.06 
   8  -6   3   21.95    3.66 
   8  -6   3   26.43    3.57 
   6   8   3   19.89    3.29 
  -8   6   3   23.44    3.57 
   6   8   3   23.59    3.63 
  -6  -8   3   26.12    3.81 
  -6  -8   3   29.79    2.37 
   8  -6   3   29.41    2.39 
  -8   6   3   25.94    3.48 
  -8   7  -3   16.17    3.12 
   8  -7  -3   12.56    2.13 
   8  -7  -3   12.39    2.32 
   7   8  -3   17.74    3.40 
  -7  -8  -3    8.41    2.65 
  -7  -8  -3   15.08    2.31 
  -7  -8  -3   12.22    2.11 
  -8   7  -3   11.34    2.15 
   8  -7  -3   11.61    2.98 
   8  -7   3   10.91    2.57 
  -8   7   3   12.38    2.50 
  -7  -8   3    9.88    2.56 
   8  -7   3    6.83    2.18 
   7   8   3    9.91    2.52 
  -7  -8   3   12.72    2.05 
  -8   7   3    6.23    2.01 
  -8   7   3    9.11    2.93 
   7   8   3   13.25    3.05 
   8  -7   3   11.68    2.80 
   8  -8  -3    2.54    2.44 
  -8  -8  -3    1.96    2.52 
   8  -8  -3    4.89    2.10 
   8   8  -3    4.74    2.44 
  -8   8  -3    3.98    1.81 
  -8   8  -3   -2.83    2.27 
  -8  -8  -3    2.27    1.94 
  -8  -8  -3    2.26    1.55 
  -8  -8   3    2.43    2.79 
  -8   8   3    4.58    2.27 
  -8  -8   3    3.57    2.10 
   8  -8   3    5.08    2.49 
   8  -8   3    4.24    1.42 
   8   8   3    2.93    2.35 
   8  -8   3    3.65    2.28 
  -8   8   3    7.12    2.80 
  -8  -8   3    5.65    1.65 
   8  -9  -3    1.52    2.39 
  -9  -8  -3    0.89    2.05 
  -8   9  -3    1.84    1.95 
  -8   9  -3   -1.68    2.53 
  -9  -8  -3   -1.47    2.59 
   9   8  -3   -2.56    2.41 
   8  -9  -3    4.36    2.51 
  -8   9   3    1.60    2.65 
   8  -9   3   -0.43    2.24 
  -9  -8   3   -0.20    2.13 
  -8   9   3   -0.32    2.19 
  -9  -8   3    0.23    1.81 
  -9  -8   3   -1.39    2.54 
   8  -9   3   -1.92    1.62 
   8  -9   3   -0.91    2.24 
   9   8   3   -2.89    2.09 
   9   7  -3   -0.61    1.96 
   7  -9  -3    1.73    2.01 
  -9  -7  -3    3.24    2.33 
  -7   9  -3    3.66    2.07 
  -7   9  -3    2.48    1.77 
  -7   9  -3    2.10    2.52 
   9   7  -3   -2.73    2.11 
  -9  -7  -3    0.74    1.91 
   7  -9  -3    1.12    2.18 
  -9  -7  -3    1.05    2.34 
  -9  -7  -3    0.82    1.85 
  -7   9   3    2.68    2.15 
  -7   9   3    5.41    2.56 
  -9  -7   3    3.20    2.44 
   7  -9   3    2.27    2.10 
  -9  -7   3   -0.50    1.90 
   7  -9   3    3.09    2.22 
  -9  -7   3    4.62    2.06 
   9   7   3    8.35    2.54 
   7  -9   3    0.12    1.45 
   9   6  -3   46.09    4.74 
  -6   9  -3   47.26    5.27 
   6  -9  -3   48.10    5.09 
  -9  -6  -3   44.79    5.07 
  -9  -6  -3   47.16    4.37 
  -9  -6  -3   50.56    5.09 
   6  -9  -3   55.16    4.90 
  -6   9  -3   47.89    3.98 
  -9  -6  -3   46.12    4.81 
  -6   9  -3   49.10    4.61 
   6  -9   3   49.48    5.19 
  -9  -6   3   43.40    4.16 
  -9  -6   3   48.35    4.43 
   6  -9   3   44.92    4.58 
  -9  -6   3   46.90    5.07 
   6  -9   3   47.04    3.86 
  -6   9   3   45.73    4.07 
  -6   9   3   49.16    5.21 
  -9  -6   3   44.05    4.49 
  -6   9   3   43.85    4.72 
   5  -9  -3   37.75    3.74 
   9   5  -3   33.08    3.90 
  -5   9  -3   29.31    3.88 
  -5   9  -3   28.56    4.03 
  -9  -5  -3   33.96    3.50 
  -5   9  -3   33.66    3.01 
  -9  -5  -3   35.03    3.53 
  -9  -5  -3   29.30    3.85 
  -9  -5  -3   30.30    4.09 
  -9  -5  -3   25.44    4.02 
   5  -9  -3   32.16    4.13 
  -9  -5   3   39.67    3.66 
   5  -9   3   29.73    3.10 
  -9  -5   3   32.12    4.19 
  -5   9   3   31.98    4.13 
  -5   9   3   33.30    4.15 
  -9  -5   3   39.39    3.38 
  -5   9   3   31.54    3.15 
  -9  -5   3   33.41    3.59 
   5  -9   3   40.75    4.34 
   5  -9   3   29.48    3.53 
   9   4  -3   83.58    6.51 
  -4   9  -3   88.88    5.49 
  -4   9  -3   84.78    6.56 
  -9  -4  -3   90.86    6.12 
  -9  -4  -3   83.49    5.84 
   4  -9  -3   86.00    6.69 
  -9  -4  -3   82.41    6.22 
  -9  -4  -3   86.34    6.41 
  -4   9  -3   80.14    6.18 
   4  -9  -3   81.13    5.79 
  -9  -4  -3   80.79    6.11 
  -9  -4   3   76.65    5.45 
   4  -9   3   74.52    6.52 
  -9  -4   3   78.25    6.39 
   4  -9   3   75.83    5.63 
  -4   9   3   73.95    5.47 
  -9  -4   3   88.73    6.12 
  -4   9   3   73.36    6.33 
   9   4   3   77.72    6.41 
  -9  -4   3   78.08    6.63 
  -9  -4   3   82.73    5.82 
  -4   9   3   89.00    6.54 
   4  -9   3   76.70    5.65 
  -3   9  -3  104.83    7.15 
  -3   9  -3  103.01    6.11 
  -9  -3  -3   98.71    6.76 
  -9  -3  -3  109.38    6.58 
  -9  -3  -3  104.72    6.86 
  -3   9  -3  114.05    7.55 
   9   3  -3   99.55    7.43 
  -9  -3  -3  105.42    7.20 
   3  -9  -3   88.72    6.66 
   3  -9  -3  109.77    7.57 
  -9  -3  -3  113.97    7.66 
  -9  -3  -3   98.14    6.90 
   3  -9   3   89.53    6.48 
  -3   9   3   91.30    7.29 
   3  -9   3   89.93    7.39 
  -3   9   3   88.37    6.20 
  -9  -3   3   93.88    7.08 
   9   3   3   97.11    7.35 
  -9  -3   3   92.62    6.16 
  -9  -3   3   95.52    7.08 
  -3   9   3   85.60    7.11 
  -9  -3   3   91.03    7.39 
  -9  -3   3   79.84    6.75 
   2  -9  -3   49.51    3.48 
  -9  -2  -3   54.19    4.37 
   9   2  -3   48.52    4.87 
  -9  -2  -3   48.48    4.47 
  -2   9  -3   55.13    4.73 
  -2   9  -3   49.03    3.23 
  -9  -2  -3   47.34    4.20 
  -2   9  -3   50.88    4.94 
   2  -9  -3   52.31    5.05 
  -2   9  -3   49.70    3.22 
  -9  -2  -3   46.95    4.45 
  -9  -2  -3   52.35    3.90 
   2  -9   3   50.86    4.10 
   9   2   3   46.33    4.67 
  -9  -2   3   47.69    3.49 
   9   2   3   52.49    4.22 
  -2   9   3   49.07    3.49 
  -2   9   3   47.63    4.56 
  -9  -2   3   41.48    4.29 
  -9  -2   3   48.77    4.55 
  -9  -2   3   53.43    3.49 
   2  -9   3   51.99    5.02 
  -9  -2   3   47.75    4.74 
  -2   9   3   48.79    4.78 
  -9  -2   3   50.35    4.33 
  -9  -1  -3  182.06   11.43 
  -9  -1  -3  192.38   11.38 
  -1   9  -3  178.95   11.92 
   1  -9  -3  172.97   11.59 
  -1   9  -3  173.53   12.06 
   1  -9  -3  185.91   12.24 
   9   1  -3  168.13   12.16 
  -9  -1  -3  171.92   11.40 
  -9  -1  -3  176.17   11.87 
   1  -9  -3  185.85   10.91 
  -9  -1  -3  186.61   11.77 
  -1   9   3  192.54   12.16 
  -1   9   3  205.10   11.02 
  -9  -1   3  190.66   11.68 
   9   1   3  195.91   12.31 
   1  -9   3  193.18   12.27 
  -9  -1   3  196.62   11.78 
  -1   9   3  198.79   12.12 
   9   1   3  190.77   11.55 
   1  -9   3  201.04   11.69 
  -9  -1   3  198.41   12.23 
   9   0  -3  258.09   15.95 
   0   9  -3  257.86   15.73 
  -9   0  -3  248.87   15.05 
  -9   0  -3  255.36   15.09 
   0   9  -3  263.73   15.93 
   9   0  -3  245.40   14.67 
  -9   0  -3  261.06   15.16 
   0  -9  -3  261.44   16.03 
   9   0  -3  259.58   15.33 
   0  -9  -3  247.62   14.48 
   0  -9  -3  252.86   15.43 
  -9   0  -3  271.60   15.67 
   0   9   3  261.27   14.54 
   0  -9   3  247.16   15.89 
  -9   0   3  246.47   15.79 
   0   9   3  248.85   15.70 
  -9   0   3  257.59   15.39 
   0  -9   3  245.15   15.32 
   0   9   3  262.34   15.86 
   9   0   3  253.54   15.93 
  -9   0   3  236.18   14.90 
   9   0   3  264.60   15.23 
  -1  -9  -3  185.26   11.87 
   9  -1  -3  192.45   12.55 
   9  -1  -3  203.90   11.19 
   9  -1  -3  194.79   11.74 
  -9   1  -3  199.07   11.64 
   1   9  -3  202.01   12.49 
  -9   1  -3  191.23   11.50 
   1   9  -3  199.78   12.37 
  -9   1  -3  197.99   12.19 
  -1  -9  -3  199.90   12.58 
  -1  -9  -3  189.78   10.84 
   9  -1   3  191.06   12.51 
  -9   1   3  179.92   11.82 
   1   9   3  180.67   12.20 
   1   9   3  180.60   12.33 
  -9   1   3  184.60   12.22 
   9  -1   3  182.61   11.64 
  -1  -9   3  204.72   12.60 
  -1  -9   3  190.63   12.47 
   9  -1   3  175.90   11.91 
   2   9  -3   48.97    4.81 
  -9   2  -3   50.58    3.98 
   2   9  -3   44.66    4.82 
  -2  -9  -3   53.14    5.10 
  -2  -9  -3   47.83    4.15 
  -9   2  -3   49.93    3.90 
   9  -2  -3   54.07    3.45 
  -9   2  -3   48.85    4.51 
   9  -2  -3   48.60    3.93 
   9  -2  -3   45.52    5.14 
  -2  -9   3   52.86    5.05 
   9  -2   3   55.09    4.60 
   9  -2   3   52.70    4.13 
   9  -2   3   53.14    3.63 
   2   9   3   52.15    5.09 
  -9   2   3   48.09    4.74 
   9  -2   3   43.65    4.89 
  -9   2   3   48.77    4.40 
   2   9   3   46.76    4.70 
  -9   2   3   50.97    3.59 
  -3  -9  -3   93.60    5.68 
   9  -3  -3   92.88    6.03 
   3   9  -3   87.18    7.27 
   9  -3  -3   83.34    7.22 
   9  -3  -3   94.22    6.45 
  -9   3  -3   93.72    6.34 
  -3  -9  -3   90.77    7.45 
  -3  -9  -3   88.82    6.80 
   3   9  -3   95.54    7.43 
  -9   3  -3   89.97    6.89 
  -9   3  -3   93.51    7.13 
  -3  -9  -3   93.23    5.68 
  -9   3   3  107.38    6.86 
   3   9   3   95.29    7.44 
  -3  -9   3   90.64    7.36 
   9  -3   3  106.61    6.24 
  -9   3   3  114.58    6.33 
   9  -3   3  110.92    6.76 
  -9   3   3  100.03    7.30 
   3   9   3  112.08    7.45 
   4   9  -3   78.63    6.84 
  -4  -9  -3   79.46    5.04 
  -9   4  -3   83.17    5.64 
   9  -4  -3   79.13    5.53 
  -4  -9  -3   82.43    5.11 
   4   9  -3   78.89    6.73 
  -9   4  -3   78.54    6.33 
   9  -4  -3   73.66    5.68 
  -9   4  -3   77.28    6.00 
  -4  -9  -3   81.54    6.81 
   9  -4  -3   97.13    7.14 
   4   9   3   73.64    6.53 
  -9   4   3   83.92    6.67 
  -9   4   3   91.17    6.21 
   4   9   3   88.46    6.70 
   9  -4   3   84.99    6.04 
  -9   4   3   80.97    5.58 
   9  -4   3   84.29    5.39 
   9  -4   3   88.09    6.92 
  -4  -9   3   93.34    6.86 
  -5  -9  -3   36.73    4.64 
   5   9  -3   36.42    4.67 
   9  -5  -3   39.81    3.38 
  -9   5  -3   34.07    3.30 
   5   9  -3   35.64    4.75 
  -9   5  -3   35.81    4.50 
  -9   5  -3   34.02    3.87 
  -5  -9  -3   34.94    3.06 
  -5  -9  -3   40.21    2.82 
   9  -5  -3   35.06    3.20 
   9  -5  -3   42.99    4.88 
   5   9   3   29.60    4.26 
   9  -5   3   32.88    4.61 
  -5  -9   3   31.57    2.29 
  -9   5   3   29.59    3.98 
   9  -5   3   32.72    2.83 
  -9   5   3   32.87    4.09 
  -5  -9   3   35.07    4.48 
   5   9   3   24.87    4.16 
   9  -5   3   34.20    3.78 
  -9   5   3   39.23    3.37 
  -5  -9   3   31.18    2.28 
  -9   6  -3   41.96    4.08 
   9  -6  -3   49.19    5.50 
  -6  -9  -3   43.36    5.50 
   9  -6  -3   46.52    3.91 
  -9   6  -3   50.92    5.51 
  -6  -9  -3   48.38    3.60 
  -9   6  -3   59.27    5.32 
   6   9  -3   43.26    5.35 
  -6  -9  -3   43.08    4.11 
   9  -6  -3   48.77    4.33 
   9  -6   3   53.23    4.69 
  -6  -9   3   47.95    5.12 
  -9   6   3   45.46    4.70 
  -9   6   3   45.04    4.26 
  -6  -9   3   41.24    3.43 
   6   9   3   53.36    5.21 
   6   9   3   47.65    5.34 
   9  -6   3   48.10    5.20 
  -6  -9   3   47.07    3.35 
  -9   6   3   44.15    5.23 
   9  -6   3   54.93    3.67 
  -9   7  -3    2.02    1.68 
   9  -7  -3    1.59    1.92 
  -7  -9  -3   -0.46    2.40 
   7   9  -3    5.84    2.84 
   9  -7  -3    6.44    2.95 
  -9   7  -3    6.42    2.72 
  -7  -9  -3    5.12    1.90 
  -7  -9  -3    2.81    1.35 
  -7  -9   3   -0.02    2.20 
   9  -7   3    1.87    2.46 
   7   9   3    2.06    2.63 
   9  -7   3    0.69    1.26 
  -9   7   3    4.78    2.01 
  -9   7   3    2.71    2.62 
  -7  -9   3    1.47    1.29 
  -7  -9   3    1.90    1.22 
   9  -7   3    1.76    2.04 
  -9   7   3    2.38    2.32 
   7   9   3    0.74    2.51 
  -8  -9  -3   -3.88    2.32 
  -9   8  -3    1.32    1.86 
  -9   8  -3   -2.08    2.58 
   8   9  -3    0.51    2.75 
  -8  -9  -3    0.27    1.91 
   9  -8  -3    2.39    2.81 
  -8  -9  -3    1.68    2.41 
   9  -8  -3   -0.02    1.81 
  -8  -9   3   -1.80    2.25 
   9  -8   3   -2.32    1.45 
  -9   8   3   -0.39    2.10 
   8   9   3   -3.97    2.31 
  -8  -9   3   -1.05    1.67 
  -8  -9   3    3.61    2.99 
   8   9   3    1.50    2.80 
  -9   8   3    2.29    2.44 
   9  -8   3   -2.24    2.12 
  -8  -9   3    3.60    1.54 
   9  -8   3   -1.68    2.59 
  -9   9  -3    9.75    2.70 
   9   9  -3   12.53    3.71 
   9  -9  -3   12.25    3.51 
  -9  -9  -3    7.07    3.41 
   9  -9  -3    8.11    2.69 
  -9  -9  -3   10.72    2.45 
  -9  -9  -3    5.38    2.55 
  -9   9  -3   11.74    3.51 
  -9   9   3    5.01    3.08 
  -9  -9   3    5.96    2.29 
   9   9   3    8.72    3.08 
  -9  -9   3    9.67    2.93 
   9  -9   3    8.79    3.10 
  -9   9   3    7.63    2.75 
  -9  -9   3   12.32    3.59 
  -9  -9   3   13.34    2.22 
   9  -9   3   11.01    1.96 
   9  -9   3   12.14    3.19 
 -10  -9  -3    1.54    3.20 
   9 -10  -3    0.03    2.83 
  -9  10  -3   -0.33    2.32 
   9 -10  -3    0.86    2.73 
  -9  10  -3    1.66    3.05 
 -10  -9  -3   -2.47    2.66 
 -10  -9  -3   -1.05    2.54 
  -9  10   3   -0.33    3.16 
   9 -10   3   -2.40    2.67 
  10   9   3    0.49    2.76 
   9 -10   3   -3.04    2.85 
  -9  10   3    1.81    2.60 
 -10  -9   3    5.07    3.13 
 -10  -9   3    1.58    2.98 
  -8  10  -3    1.66    2.31 
 -10  -8  -3    0.07    2.50 
 -10  -8  -3   -0.61    3.00 
   8 -10  -3    2.01    2.43 
 -10  -8  -3    1.68    3.08 
  10   8  -3    2.27    2.80 
   8 -10  -3    0.66    2.60 
  -8  10  -3    4.05    3.10 
  -8  10   3    0.03    2.45 
  -8  10   3    3.16    2.79 
   8 -10   3    0.39    2.52 
 -10  -8   3    2.41    3.16 
 -10  -8   3    1.91    2.58 
   8 -10   3   -1.98    2.57 
 -10  -7  -3   10.34    3.07 
  -7  10  -3    6.81    2.46 
  10   7  -3   10.37    2.85 
 -10  -7  -3    8.30    2.79 
 -10  -7  -3   10.42    2.89 
  -7  10  -3   11.44    3.26 
   7 -10  -3    9.94    2.97 
   7 -10  -3   12.04    2.87 
   7 -10   3    5.50    2.43 
   7 -10   3    9.28    3.10 
 -10  -7   3   10.53    2.95 
 -10  -7   3    7.02    3.11 
  -7  10   3    6.34    3.06 
  -7  10   3    9.00    2.91 
 -10  -7   3    7.73    2.45 
  10   6  -3   14.46    3.13 
 -10  -6  -3   11.58    3.18 
 -10  -6  -3   14.32    3.11 
   6 -10  -3   15.19    2.84 
  -6  10  -3   17.23    2.92 
  -6  10  -3   16.11    3.56 
   6 -10  -3   13.94    3.00 
 -10  -6  -3   14.87    2.98 
  -6  10  -3   18.33    3.06 
 -10  -6  -3   15.55    3.24 
  -6  10   3   18.59    3.59 
 -10  -6   3   18.87    2.64 
 -10  -6   3   16.81    3.25 
   6 -10   3   17.19    3.36 
 -10  -6   3   20.98    3.41 
  -6  10   3   13.13    2.24 
  -6  10   3   20.10    3.38 
   6 -10   3   16.55    2.79 
  10   5  -3   33.81    4.43 
   5 -10  -3   36.56    4.02 
 -10  -5  -3   27.41    4.06 
 -10  -5  -3   36.15    4.02 
   5 -10  -3   31.80    4.58 
 -10  -5  -3   33.82    4.47 
  -5  10  -3   34.16    5.00 
  -5  10  -3   33.66    3.27 
  -5  10  -3   30.04    4.27 
 -10  -5  -3   38.35    4.56 
 -10  -5   3   32.56    4.67 
 -10  -5   3   32.16    4.43 
  -5  10   3   29.17    4.72 
  -5  10   3   34.85    3.41 
   5 -10   3   38.87    4.93 
 -10  -5   3   31.68    3.71 
  -5  10   3   26.51    4.42 
  -4  10  -3   51.38    3.94 
 -10  -4  -3   49.55    4.57 
 -10  -4  -3   54.07    5.28 
   4 -10  -3   48.39    5.52 
  -4  10  -3   43.09    5.46 
 -10  -4  -3   53.29    5.12 
  -4  10  -3   52.67    5.20 
  10   4  -3   49.45    5.35 
   4 -10  -3   53.79    4.52 
 -10  -4  -3   53.56    4.94 
  10   4   3   51.63    5.32 
 -10  -4   3   59.34    5.64 
  -4  10   3   57.95    5.46 
   4 -10   3   64.33    5.87 
  -4  10   3   55.61    5.40 
  -4  10   3   54.04    4.15 
 -10  -4   3   58.94    4.59 
 -10  -4   3   58.20    4.24 
 -10  -4   3   59.82    5.38 
 -10  -3  -3   52.77    4.94 
   3 -10  -3   52.84    4.19 
  -3  10  -3   50.25    3.41 
 -10  -3  -3   45.86    4.15 
  -3  10  -3   52.41    3.38 
 -10  -3  -3   51.42    4.65 
 -10  -3  -3   53.47    4.46 
  -3  10  -3   51.21    5.10 
   3 -10  -3   48.02    5.16 
  10   3  -3   56.34    5.34 
  -3  10  -3   50.46    5.38 
  -3  10   3   47.76    4.98 
  -3  10   3   43.47    3.57 
   3 -10   3   43.75    5.27 
 -10  -3   3   45.90    3.68 
  10   3   3   47.44    5.30 
 -10  -3   3   41.30    5.07 
 -10  -3   3   43.56    3.95 
 -10  -3   3   44.93    4.81 
  -3  10   3   42.51    5.10 
  -2  10  -3   80.99    4.79 
  10   2  -3   77.44    6.76 
   2 -10  -3   84.68    6.88 
 -10  -2  -3   79.18    5.84 
  -2  10  -3   76.24    4.76 
 -10  -2  -3   79.03    6.33 
 -10  -2  -3   70.08    5.85 
  -2  10  -3   81.04    6.49 
 -10  -2  -3   77.08    5.62 
   2 -10  -3   77.49    5.08 
  -2  10  -3   80.67    6.65 
  -2  10   3   82.25    5.14 
  -2  10   3   77.47    6.56 
 -10  -2   3   82.51    6.71 
  -2  10   3   77.64    6.66 
 -10  -2   3   75.31    5.14 
 -10  -2   3   78.97    6.19 
  10   2   3   83.33    6.81 
 -10  -2   3   85.26    5.27 
  10   2   3   75.08    5.90 
   2 -10   3   79.98    6.69 
  -1  10  -3   87.61    6.97 
   1 -10  -3   89.77    5.22 
 -10  -1  -3   91.50    6.57 
  10   1  -3  102.28    7.32 
 -10  -1  -3   91.63    6.11 
 -10  -1  -3   91.01    6.09 
  -1  10  -3   95.30    6.80 
   1 -10  -3   96.73    7.32 
  -1  10   3   78.67    5.19 
 -10  -1   3   80.27    5.43 
 -10  -1   3   80.64    6.77 
  10   1   3   70.35    5.99 
  -1  10   3   80.61    6.89 
  10   1   3   76.02    7.09 
 -10  -1   3   81.98    6.38 
  -1  10   3   71.57    6.55 
   1 -10   3   81.13    7.04 
  10   0  -3  109.94    8.25 
   0 -10  -3  110.76    8.14 
  10   0  -3  104.88    6.38 
 -10   0  -3  106.28    7.71 
 -10   0  -3  105.21    7.09 
   0  10  -3  103.48    7.89 
  10   0  -3   89.59    7.02 
   0  10  -3  102.66    7.79 
 -10   0  -3  105.66    6.94 
   0 -10  -3  101.78    6.01 
   0  10   3  106.92    7.79 
 -10   0   3  105.07    6.47 
   0  10   3  105.61    6.03 
 -10   0   3   92.64    7.71 
  10   0   3  110.16    8.24 
   0  10   3  104.90    7.86 
   0 -10   3  106.90    8.08 
 -10   0   3  100.96    7.29 
  10   0   3  101.53    7.13 
  -1 -10  -3   83.81    6.97 
   1  10  -3   72.90    6.84 
  10  -1  -3   80.45    7.22 
  10  -1  -3   74.90    5.92 
 -10   1  -3   79.16    5.82 
 -10   1  -3   73.42    6.44 
   1  10  -3   77.70    6.80 
  10  -1  -3   78.11    5.28 
  -1 -10   3   92.38    7.18 
  10  -1   3   92.68    7.30 
  10  -1   3  100.65    6.24 
 -10   1   3   90.02    6.39 
 -10   1   3   95.30    7.06 
 -10   1   3   88.41    5.50 
   1  10   3   95.06    6.94 
   1  10   3   85.01    6.89 
  10  -2  -3   76.37    5.13 
 -10   2  -3   89.05    5.92 
 -10   2  -3   81.79    5.68 
   2  10  -3   80.56    6.83 
  10  -2  -3   76.10    7.04 
  -2 -10  -3   84.82    7.09 
  10  -2  -3   68.64    5.66 
 -10   2  -3   81.95    6.47 
   2  10  -3   81.21    6.95 
  10  -2   3   82.00    5.45 
 -10   2   3   85.20    5.39 
 -10   2   3   81.97    6.72 
  10  -2   3   75.88    6.97 
  -2 -10   3   81.95    6.98 
  10  -2   3   83.76    5.98 
   2  10   3   78.15    6.63 
   2  10   3   80.71    6.85 
 -10   2   3   83.52    6.21 
   3  10  -3   44.82    4.97 
  -3 -10  -3   51.87    5.60 
 -10   3  -3   53.98    4.35 
   3  10  -3   42.13    5.43 
 -10   3  -3   48.16    4.99 
 -10   3  -3   46.93    4.03 
  10  -3  -3   50.72    5.62 
  10  -3  -3   42.82    3.96 
  10  -3   3   51.33    3.68 
   3  10   3   49.27    5.09 
 -10   3   3   50.47    3.86 
 -10   3   3   45.69    4.99 
 -10   3   3   49.82    4.65 
  10  -3   3   49.87    5.48 
  -3 -10   3   45.92    5.41 
   3  10   3   53.74    5.48 
  10  -3   3   47.70    4.37 
  -4 -10  -3   59.91    6.19 
  10  -4  -3   55.95    6.08 
  -4 -10  -3   55.52    3.41 
 -10   4  -3   67.94    5.15 
   4  10  -3   57.19    5.89 
 -10   4  -3   62.84    5.52 
  -4 -10  -3   58.93    3.44 
  10  -4  -3   60.30    4.42 
 -10   4  -3   55.68    4.50 
  10  -4  -3   62.01    4.49 
   4  10  -3   57.41    5.89 
  10  -4   3   54.34    5.99 
 -10   4   3   44.26    4.94 
  10  -4   3   50.09    4.78 
 -10   4   3   50.22    4.26 
   4  10   3   52.30    5.48 
  10  -4   3   56.64    4.07 
   4  10   3   58.12    5.61 
  -4 -10   3   49.48    5.82 
 -10   4   3   54.24    5.63 
  -5 -10  -3   37.00    5.07 
  -5 -10  -3   29.08    2.52 
 -10   5  -3   35.38    4.34 
 -10   5  -3   32.33    3.63 
   5  10  -3   29.93    4.63 
 -10   5  -3   35.34    4.76 
  -5 -10  -3   30.66    2.45 
  10  -5  -3   33.85    3.42 
   5  10  -3   25.81    4.34 
  10  -5  -3   38.29    5.36 
   5  10   3   38.42    5.22 
   5  10   3   35.08    4.77 
 -10   5   3   39.18    4.62 
 -10   5   3   36.81    3.45 
  10  -5   3   38.21    3.06 
  10  -5   3   27.64    4.94 
  10  -5   3   32.36    3.99 
  -5 -10   3   34.68    4.86 
 -10   5   3   37.53    4.33 
 -10   6  -3   16.69    3.39 
  -6 -10  -3   18.52    2.16 
  -6 -10  -3   15.61    2.00 
  10  -6  -3   19.03    2.58 
  10  -6  -3   17.36    4.01 
 -10   6  -3   16.63    2.50 
   6  10  -3   21.79    3.98 
  -6 -10  -3   17.84    3.74 
   6  10  -3   16.94    3.65 
   6  10   3   15.39    3.49 
  10  -6   3   13.87    2.15 
  -6 -10   3   11.85    1.41 
 -10   6   3   12.49    2.29 
   6  10   3   12.25    3.31 
 -10   6   3   12.36    2.74 
  10  -6   3   14.42    3.36 
  -6 -10   3   14.49    3.39 
 -10   6   3   10.03    2.98 
  10  -6   3   14.95    2.67 
  -6 -10   3   12.65    1.34 
 -10   7  -3   12.95    3.10 
   7  10  -3    6.34    3.13 
  10  -7  -3    6.87    2.28 
  -7 -10  -3    7.54    2.08 
  -7 -10  -3   10.03    3.10 
 -10   7  -3    6.05    2.27 
  10  -7  -3    9.33    3.50 
  -7 -10  -3    8.77    1.61 
  10  -7   3    6.54    1.63 
 -10   7   3    9.86    2.71 
  10  -7   3   10.23    2.73 
 -10   7   3    7.50    2.27 
  -7 -10   3   10.55    1.41 
  10  -7   3   10.33    3.26 
  -7 -10   3    8.20    3.33 
   7  10   3   11.62    3.10 
   7  10   3    9.91    3.45 
  -7 -10   3   10.42    1.84 
 -10   7   3    5.98    3.25 
  -8 -10  -3    0.96    2.15 
 -10   8  -3   -0.53    1.90 
   8  10  -3    2.85    3.16 
  10  -8  -3   -0.23    3.09 
  -8 -10  -3    1.62    2.00 
 -10   8  -3    0.49    3.08 
  10  -8  -3    2.60    2.33 
  -8 -10  -3   -3.81    2.74 
  10  -8   3    1.43    3.14 
  -8 -10   3    3.79    2.97 
  10  -8   3    2.35    2.32 
 -10   8   3    0.54    2.42 
  -8 -10   3   -1.66    3.32 
   8  10   3    2.47    3.27 
  -8 -10   3    3.40    1.75 
   8  10   3   -0.98    2.72 
 -10   8   3    5.13    3.11 
  -9 -10  -3    0.63    3.11 
  10  -9  -3    0.05    2.42 
 -10   9  -3   -1.15    2.95 
  -9 -10  -3    1.79    2.50 
 -10   9  -3    2.06    2.57 
  10  -9  -3    2.76    3.31 
   9  10   3    0.27    2.82 
  -9 -10   3   -0.12    2.07 
  -9 -10   3    0.11    3.64 
 -10   9   3    1.84    2.70 
  10  -9   3    4.65    2.77 
  -9 -10   3    2.93    3.19 
 -10   9   3   -1.00    3.30 
  10  -9   3    0.02    2.85 
  10 -10  -3    0.78    3.62 
 -10  10  -3    8.95    4.01 
 -10  10  -3    8.74    3.45 
 -10 -10  -3    6.49    4.06 
  10 -10  -3    6.82    3.04 
 -10 -10  -3    4.25    3.69 
  10  10  -3    2.02    3.48 
 -10 -10  -3    7.90    3.04 
  10  10   3    4.18    3.80 
 -10 -10   3    7.33    4.04 
  10 -10   3    5.17    3.15 
 -10 -10   3   10.10    3.05 
 -10  10   3    5.56    3.92 
  10 -10   3    5.48    3.53 
 -10 -10   3    8.79    3.81 
 -10  10   3    5.67    3.25 
 -10  11  -3   13.98    3.84 
  10 -11  -3   17.17    4.21 
 -11 -10  -3   13.06    4.71 
  11  10  -3   18.58    4.61 
  10 -11  -3   12.05    3.53 
 -10  11  -3   11.10    4.64 
 -11 -10  -3   11.86    6.28 
 -11 -10  -3   15.49    3.91 
 -11 -10   3    3.81    4.18 
 -11 -10   3    5.86    3.74 
 -10  11   3    7.50    3.84 
  10 -11   3    3.87    3.89 
 -10  11   3    6.97    4.07 
 -11 -10   3   14.92    3.62 
  10 -11   3    6.77    3.61 
  -9  11  -3    6.99    3.98 
 -11  -9  -3    9.68    3.73 
  -9  11  -3   11.26    3.54 
 -11  -9  -3   11.66    3.47 
   9 -11  -3   10.09    3.53 
   9 -11  -3    9.83    3.75 
 -11  -9  -3    8.82    3.98 
  -9  11   3   16.85    4.67 
   9 -11   3    7.59    3.45 
  -9  11   3   11.88    3.75 
   9 -11   3    7.10    3.47 
 -11  -9   3    9.64    3.76 
 -11  -9   3   14.29    3.77 
 -11  -8  -3   10.66    3.44 
  -8  11  -3   14.15    3.30 
  -8  11  -3    8.86    3.78 
   8 -11  -3   12.89    3.42 
 -11  -8  -3    6.33    3.60 
 -11  -8  -3   10.75    3.43 
   8 -11  -3   10.94    3.40 
   8 -11   3   17.89    3.86 
  -8  11   3   12.87    3.69 
   8 -11   3   11.85    3.30 
 -11  -8   3   16.93    3.50 
  -8  11   3   12.03    3.71 
 -11  -8   3   12.20    4.61 
  -7  11  -3    3.85    2.86 
  11   7  -3    1.28    2.82 
 -11  -7  -3    3.29    2.90 
 -11  -7  -3    5.31    2.84 
   7 -11  -3    4.07    2.55 
 -11  -7  -3    0.05    2.67 
 -11  -7  -3    4.25    3.13 
   7 -11  -3    4.98    2.97 
 -11  -7   3   -0.22    2.79 
  -7  11   3    1.35    4.98 
  -7  11   3   -1.20    2.82 
   7 -11   3    0.88    2.71 
 -11  -7   3    6.27    2.69 
  11   6  -3   32.36    5.15 
  -6  11  -3   33.31    3.47 
  -6  11  -3   33.82    5.49 
 -11  -6  -3   28.05    4.54 
  -6  11  -3   28.35    4.59
[truncated: 2,082,276 more chars]
