# Supplementary material
Source: MDPI journal article supplement (https://www.mdpi.com/2304-6740/7/9/105)
Supplement: s1 [file s1 › Complex3_CIF.cif]

data_s1 
_audit_creation_date               2019-07-07 
_audit_creation_method 
; 
Olex2 1.2 
(compiled 2018.05.29 svn.r3508 for OlexSys, GUI svn.r5506) 
; 
_shelx_SHELXL_version_number       '2017/1' 
_audit_contact_author_address      ? 
_audit_contact_author_email        ? 
_audit_contact_author_name         '' 
_audit_contact_author_phone        ? 
_publ_contact_author_id_orcid      ? 
_publ_section_references 
; 
Dolomanov, O.V., Bourhis, L.J., Gildea, R.J, Howard, J.A.K. & Puschmann, H. 
 (2009), J. Appl. Cryst. 42, 339-341. 
  
Sheldrick, G.M. (2008). Acta Cryst. A64, 112-122. 
  
Sheldrick, G.M. (2015). Acta Cryst. C71, 3-8. 
; 
_chemical_name_common              ? 
_chemical_name_systematic          ? 
_chemical_formula_moiety           'C36 H53 N2 P Th' 
_chemical_formula_sum              'C36 H53 N2 P Th' 
_chemical_formula_weight           776.81 
_chemical_melting_point            ? 
loop_ 
  _atom_type_symbol 
  _atom_type_description 
  _atom_type_scat_dispersion_real 
  _atom_type_scat_dispersion_imag 
  _atom_type_scat_source 
 'C' 'C' 0.0033 0.0016 'International Tables Vol C Tables 4.2.6.8 and 6.1.1.4' 
 'H' 'H' 0.0000 0.0000 'International Tables Vol C Tables 4.2.6.8 and 6.1.1.4' 
 'N' 'N' 0.0061 0.0033 'International Tables Vol C Tables 4.2.6.8 and 6.1.1.4' 
 'P' 'P' 0.1023 0.0942 'International Tables Vol C Tables 4.2.6.8 and 6.1.1.4' 
 'Th' 'Th' -7.2400 8.8979 
 'International Tables Vol C Tables 4.2.6.8 and 6.1.1.4' 
  
_shelx_space_group_comment 
; 
The symmetry employed for this shelxl refinement is uniquely defined 
by the following loop, which should always be used as a source of 
symmetry information in preference to the above space-group names. 
They are only intended as comments. 
; 
_space_group_crystal_system        'monoclinic' 
_space_group_IT_number             14 
_space_group_name_H-M_alt          'P 1 21/c 1' 
_space_group_name_Hall             '-P 2ybc' 
loop_ 
  _space_group_symop_operation_xyz 
 'x, y, z' 
 '-x, y+1/2, -z+1/2' 
 '-x, -y, -z' 
 'x, -y-1/2, z-1/2' 
  
_cell_length_a                     10.0829(10) 
_cell_length_b                     33.981(3) 
_cell_length_c                     10.7807(11) 
_cell_angle_alpha                  90 
_cell_angle_beta                   107.8389(17) 
_cell_angle_gamma                  90 
_cell_volume                       3516.1(6) 
_cell_formula_units_Z              4 
_cell_measurement_reflns_used      9938 
_cell_measurement_temperature      100.0 
_cell_measurement_theta_max        25.12 
_cell_measurement_theta_min        2.32 
_shelx_estimated_absorpt_T_max     0.813 
_shelx_estimated_absorpt_T_min     0.672 
_exptl_absorpt_coefficient_mu      4.311 
_exptl_absorpt_correction_T_max    0.7457 
_exptl_absorpt_correction_T_min    0.5833 
_exptl_absorpt_correction_type     multi-scan 
_exptl_absorpt_process_details     'Bruker AXScale' 
_exptl_absorpt_special_details     ? 
_exptl_crystal_colour              yellow 
_exptl_crystal_density_diffrn      1.467 
_exptl_crystal_density_meas        ? 
_exptl_crystal_density_method      ? 
_exptl_crystal_description         prism 
_exptl_crystal_F_000               1552 
_exptl_crystal_size_max            0.1 
_exptl_crystal_size_mid            0.1 
_exptl_crystal_size_min            0.05 
_exptl_transmission_factor_max     ? 
_exptl_transmission_factor_min     ? 
_diffrn_reflns_av_R_equivalents    0.0777 
_diffrn_reflns_av_unetI/netI       0.0480 
_diffrn_reflns_Laue_measured_fraction_full  0.999 
_diffrn_reflns_Laue_measured_fraction_max  0.966 
_diffrn_reflns_limit_h_max         13 
_diffrn_reflns_limit_h_min         -13 
_diffrn_reflns_limit_k_max         45 
_diffrn_reflns_limit_k_min         -45 
_diffrn_reflns_limit_l_max         14 
_diffrn_reflns_limit_l_min         -14 
_diffrn_reflns_number              85672 
_diffrn_reflns_point_group_measured_fraction_full  0.999 
_diffrn_reflns_point_group_measured_fraction_max  0.966 
_diffrn_reflns_theta_full          25.242 
_diffrn_reflns_theta_max           28.305 
_diffrn_reflns_theta_min           0.599 
_diffrn_ambient_temperature        100.0 
_diffrn_detector_area_resol_mean   ? 
_diffrn_measured_fraction_theta_full  0.999 
_diffrn_measured_fraction_theta_max  0.966 
_diffrn_measurement_device_type    'Bruker APEX II area detector' 
_diffrn_measurement_method         'omega and phi scans' 
_diffrn_radiation_monochromator    graphite 
_diffrn_radiation_type             MoK\a 
_diffrn_radiation_wavelength       0.71073 
_diffrn_source                     'Sealed Source Mo with TRIUMPH optics' 
_diffrn_standards_number           0 
_reflns_Friedel_coverage           0.000 
_reflns_Friedel_fraction_full      . 
_reflns_Friedel_fraction_max       . 
_reflns_number_gt                  7213 
_reflns_number_total               8492 
_reflns_special_details 
; 
 Reflections were merged by SHELXL according to the crystal 
 class for the calculation of statistics and refinement. 
  
 _reflns_Friedel_fraction is defined as the number of unique 
 Friedel pairs measured divided by the number that would be 
 possible theoretically, ignoring centric projections and 
 systematic absences. 
; 
_reflns_threshold_expression       'I > 2\s(I)' 
_computing_cell_refinement         ? 
_computing_data_collection         ? 
_computing_data_reduction          ? 
_computing_molecular_graphics      'Olex2 (Dolomanov et al., 2009)' 
_computing_publication_material    'Olex2 (Dolomanov et al., 2009)' 
_computing_structure_refinement    'ShelXL (Sheldrick, 2015)' 
_computing_structure_solution      'ShelXS (Sheldrick, 2008)' 
_refine_diff_density_max           2.692 
_refine_diff_density_min           -5.578 
_refine_diff_density_rms           0.193 
_refine_ls_extinction_coef         . 
_refine_ls_extinction_method       none 
_refine_ls_goodness_of_fit_ref     1.360 
_refine_ls_hydrogen_treatment      constr 
_refine_ls_matrix_type             full 
_refine_ls_number_parameters       378 
_refine_ls_number_reflns           8492 
_refine_ls_number_restraints       0 
_refine_ls_R_factor_all            0.0747 
_refine_ls_R_factor_gt             0.0594 
_refine_ls_restrained_S_all        1.360 
_refine_ls_shift/su_max            0.000 
_refine_ls_shift/su_mean           0.000 
_refine_ls_structure_factor_coef   Fsqd 
_refine_ls_weighting_details 
 'w=1/[\s^2^(Fo^2^)+40.9214P] where P=(Fo^2^+2Fc^2^)/3' 
_refine_ls_weighting_scheme        calc 
_refine_ls_wR_factor_gt            0.1114 
_refine_ls_wR_factor_ref           0.1147 
_refine_special_details 
; 
 Refined as a 2-component twin. 
; 
_olex2_refinement_description 
; 
1. Twinned data refinement 
 Scales: 0.906(3) 
 0.094(3) 
2. Fixed Uiso 
 At 1.2 times of: 
  All C(H) groups 
 At 1.5 times of: 
  All C(H,H,H) groups 
3.a Aromatic/amide H refined with riding coordinates: 
 C32(H32), C36(H36), C33(H33), C35(H35), C34(H34) 
3.b Idealised Me refined as rotating group: 
 C8(H8A,H8B,H8C), C28(H28A,H28B,H28C), C29(H29A,H29B,H29C), C19(H19A,H19B, 
 H19C), C7(H7A,H7B,H7C), C16(H16A,H16B,H16C), C20(H20A,H20B,H20C), C18(H18A, 
 H18B,H18C), C17(H17A,H17B,H17C), C30(H30A,H30B,H30C), C6(H6A,H6B,H6C), 
 C10(H10A,H10B,H10C), C9(H9A,H9B,H9C), C25(H25A,H25B,H25C), C24(H24A,H24B,H24C), 
  C23(H23A,H23B,H23C) 
; 
_atom_sites_solution_hydrogens     geom 
_atom_sites_solution_primary       direct 
_atom_sites_solution_secondary     difmap 
loop_ 
  _atom_site_label 
  _atom_site_type_symbol 
  _atom_site_fract_x 
  _atom_site_fract_y 
  _atom_site_fract_z 
  _atom_site_U_iso_or_equiv 
  _atom_site_adp_type 
  _atom_site_occupancy 
  _atom_site_site_symmetry_order 
  _atom_site_calc_flag 
  _atom_site_refinement_flags_posn 
  _atom_site_refinement_flags_adp 
  _atom_site_refinement_flags_occupancy 
  _atom_site_disorder_assembly 
  _atom_site_disorder_group 
 Th1 Th 0.13196(3) 0.11477(2) 0.83905(3) 0.01266(8) Uani 1 1 d . . . . . 
 C13 C 0.2959(8) 0.1475(2) 0.6964(8) 0.0175(16) Uani 1 1 d . . . . . 
 C12 C 0.3805(7) 0.1169(2) 0.7678(7) 0.0184(15) Uani 1 1 d . . . . . 
 C8 C -0.1150(8) 0.1133(3) 1.0451(9) 0.0268(18) Uani 1 1 d . . . . . 
 H8A H -0.068548 0.133049 1.110180 0.040 Uiso 1 1 calc GR . . . . 
 H8B H -0.175396 0.096894 1.079782 0.040 Uiso 1 1 calc GR . . . . 
 H8C H -0.171354 0.126546 0.965667 0.040 Uiso 1 1 calc GR . . . . 
 C11 C 0.3188(8) 0.0806(2) 0.7176(8) 0.0180(16) Uani 1 1 d . . . . . 
 C15 C 0.1962(8) 0.0887(2) 0.6122(8) 0.0166(16) Uani 1 1 d . . . . . 
 C5 C 0.1980(8) 0.0559(2) 1.0332(8) 0.0189(16) Uani 1 1 d . . . . . 
 C14 C 0.1808(8) 0.1306(2) 0.5983(8) 0.0175(16) Uani 1 1 d . . . . . 
 N2 N 0.0166(6) 0.17502(18) 0.8333(6) 0.0135(12) Uani 1 1 d . . . . . 
 C28 C 0.1327(8) 0.2288(2) 0.9744(8) 0.0242(18) Uani 1 1 d . . . . . 
 H28A H 0.151739 0.211049 1.049491 0.036 Uiso 1 1 calc GR . . . . 
 H28B H 0.122491 0.255761 1.002427 0.036 Uiso 1 1 calc GR . . . . 
 H28C H 0.210048 0.227678 0.937380 0.036 Uiso 1 1 calc GR . . . . 
 C29 C -0.1223(9) 0.2188(2) 0.9296(8) 0.0230(18) Uani 1 1 d . . . . . 
 H29A H -0.207680 0.209052 0.865789 0.034 Uiso 1 1 calc GR . . . . 
 H29B H -0.135546 0.246215 0.951192 0.034 Uiso 1 1 calc GR . . . . 
 H29C H -0.101149 0.202686 1.008728 0.034 Uiso 1 1 calc GR . . . . 
 C19 C 0.0771(8) 0.1533(2) 0.4939(8) 0.0206(16) Uani 1 1 d . . . . . 
 H19A H 0.003922 0.135543 0.443495 0.031 Uiso 1 1 calc GR . . . . 
 H19B H 0.123896 0.165443 0.436098 0.031 Uiso 1 1 calc GR . . . . 
 H19C H 0.035523 0.173939 0.533774 0.031 Uiso 1 1 calc GR . . . . 
 C7 C -0.1766(8) 0.0474(3) 0.8270(9) 0.0270(19) Uani 1 1 d . . . . . 
 H7A H -0.228725 0.071106 0.789115 0.041 Uiso 1 1 calc GR . . . . 
 H7B H -0.226901 0.033238 0.877879 0.041 Uiso 1 1 calc GR . . . . 
 H7C H -0.166702 0.030356 0.756994 0.041 Uiso 1 1 calc GR . . . . 
 C1 C 0.0935(8) 0.0388(2) 0.9263(8) 0.0194(16) Uani 1 1 d . . . . . 
 C3 C -0.0078(8) 0.0880(2) 1.0141(8) 0.0184(16) Uani 1 1 d . . . . . 
 C2 C -0.0342(8) 0.0589(2) 0.9146(8) 0.0197(16) Uani 1 1 d . . . . . 
 C27 C -0.0012(8) 0.2162(2) 0.8719(8) 0.0186(16) Uani 1 1 d . . . . . 
 C16 C 0.3885(8) 0.0413(2) 0.7526(8) 0.0222(17) Uani 1 1 d . . . . . 
 H16A H 0.423278 0.038641 0.847592 0.033 Uiso 1 1 calc GR . . . . 
 H16B H 0.466472 0.039220 0.716603 0.033 Uiso 1 1 calc GR . . . . 
 H16C H 0.321074 0.020271 0.716314 0.033 Uiso 1 1 calc GR . . . . 
 C20 C 0.1103(8) 0.0582(2) 0.5204(8) 0.0193(16) Uani 1 1 d . . . . . 
 H20A H 0.171581 0.041684 0.487234 0.029 Uiso 1 1 calc GR . . . . 
 H20B H 0.042209 0.071380 0.447392 0.029 Uiso 1 1 calc GR . . . . 
 H20C H 0.061356 0.041765 0.567033 0.029 Uiso 1 1 calc GR . . . . 
 C4 C 0.1354(8) 0.0863(2) 1.0869(7) 0.0178(16) Uani 1 1 d . . . . . 
 C18 C 0.3313(8) 0.1909(2) 0.7102(8) 0.0216(17) Uani 1 1 d . . . . . 
 H18A H 0.245185 0.206349 0.683993 0.032 Uiso 1 1 calc GR . . . . 
 H18B H 0.388566 0.197618 0.654481 0.032 Uiso 1 1 calc GR . . . . 
 H18C H 0.383046 0.196689 0.801234 0.032 Uiso 1 1 calc GR . . . . 
 C17 C 0.5231(8) 0.1208(3) 0.8648(8) 0.0233(18) Uani 1 1 d . . . . . 
 H17A H 0.536447 0.147799 0.898320 0.035 Uiso 1 1 calc GR . . . . 
 H17B H 0.593745 0.114717 0.822213 0.035 Uiso 1 1 calc GR . . . . 
 H17C H 0.532231 0.102454 0.937037 0.035 Uiso 1 1 calc GR . . . . 
 C30 C -0.0276(9) 0.2432(2) 0.7534(8) 0.0234(18) Uani 1 1 d . . . . . 
 H30A H 0.053042 0.242508 0.720850 0.035 Uiso 1 1 calc GR . . . . 
 H30B H -0.042211 0.270208 0.778535 0.035 Uiso 1 1 calc GR . . . . 
 H30C H -0.110650 0.234254 0.684897 0.035 Uiso 1 1 calc GR . . . . 
 C6 C 0.1058(9) 0.0028(2) 0.8493(8) 0.0251(18) Uani 1 1 d . . . . . 
 H6A H 0.067765 0.008438 0.755975 0.038 Uiso 1 1 calc GR . . . . 
 H6B H 0.053519 -0.018949 0.871990 0.038 Uiso 1 1 calc GR . . . . 
 H6C H 0.204065 -0.004680 0.869863 0.038 Uiso 1 1 calc GR . . . . 
 C10 C 0.3488(8) 0.0430(3) 1.0896(9) 0.0271(19) Uani 1 1 d . . . . . 
 H10A H 0.366287 0.020373 1.040440 0.041 Uiso 1 1 calc GR . . . . 
 H10B H 0.366946 0.035544 1.181159 0.041 Uiso 1 1 calc GR . . . . 
 H10C H 0.410369 0.064739 1.083725 0.041 Uiso 1 1 calc GR . . . . 
 C9 C 0.2019(9) 0.1079(3) 1.2116(8) 0.0274(19) Uani 1 1 d . . . . . 
 H9A H 0.303458 0.106255 1.233335 0.041 Uiso 1 1 calc GR . . . . 
 H9B H 0.172435 0.096056 1.281790 0.041 Uiso 1 1 calc GR . . . . 
 H9C H 0.173189 0.135600 1.201389 0.041 Uiso 1 1 calc GR . . . . 
 P1 P -0.2490(2) 0.16436(6) 0.6537(2) 0.0184(4) Uani 1 1 d . . . . . 
 N1 N 0.4192(6) 0.16697(19) 1.0999(6) 0.0175(13) Uani 1 1 d . . . . . 
 C26 C -0.0807(7) 0.1534(2) 0.7427(7) 0.0133(14) Uani 1 1 d . . . . . 
 C21 C 0.3283(8) 0.1525(2) 1.0205(7) 0.0180(16) Uani 1 1 d . . . . . 
 C32 C -0.4464(8) 0.1076(2) 0.5362(7) 0.0192(16) Uani 1 1 d . . . . . 
 H32 H -0.508758 0.125517 0.556999 0.023 Uiso 1 1 calc R . . A . 
 C36 C -0.2200(8) 0.0913(2) 0.5302(7) 0.0197(16) Uani 1 1 d . . . . . 
 H36 H -0.124124 0.097509 0.548085 0.024 Uiso 1 1 calc R . . B . 
 C22 C 0.5327(8) 0.1871(3) 1.1998(8) 0.0234(18) Uani 1 1 d . . . . . 
 C33 C -0.4980(9) 0.0726(3) 0.4778(8) 0.0253(18) Uani 1 1 d . . . . . 
 H33 H -0.593708 0.066365 0.461118 0.030 Uiso 1 1 calc R . . . . 
 C35 C -0.2706(9) 0.0560(3) 0.4691(9) 0.0267(19) Uani 1 1 d . . . . . 
 H35 H -0.209763 0.038261 0.445121 0.032 Uiso 1 1 calc R . . . . 
 C25 C 0.6522(9) 0.1581(3) 1.2478(9) 0.038(2) Uani 1 1 d . . . . . 
 H25A H 0.618651 0.134203 1.279509 0.056 Uiso 1 1 calc GR . . . . 
 H25B H 0.726449 0.170032 1.318824 0.056 Uiso 1 1 calc GR . . . . 
 H25C H 0.688621 0.151285 1.176040 0.056 Uiso 1 1 calc GR . . . . 
 C24 C 0.4749(10) 0.2001(3) 1.3089(9) 0.034(2) Uani 1 1 d . . . . . 
 H24A H 0.394600 0.217461 1.272958 0.051 Uiso 1 1 calc GR . . . . 
 H24B H 0.547216 0.214292 1.375623 0.051 Uiso 1 1 calc GR . . . . 
 H24C H 0.445716 0.176931 1.347975 0.051 Uiso 1 1 calc GR . . . . 
 C34 C -0.4107(9) 0.0466(3) 0.4433(8) 0.0277(19) Uani 1 1 d . . . . . 
 H34 H -0.445957 0.022398 0.402097 0.033 Uiso 1 1 calc R . . . . 
 C23 C 0.5737(10) 0.2230(3) 1.1310(11) 0.040(2) Uani 1 1 d . . . . . 
 H23A H 0.609736 0.213829 1.061347 0.060 Uiso 1 1 calc GR . . . . 
 H23B H 0.645664 0.238273 1.194427 0.060 Uiso 1 1 calc GR . . . . 
 H23C H 0.491552 0.239550 1.093758 0.060 Uiso 1 1 calc GR . . . . 
 C31 C -0.3084(8) 0.1179(2) 0.5659(7) 0.0188(15) Uani 1 1 d . . . C 2 
  
loop_ 
  _atom_site_aniso_label 
  _atom_site_aniso_U_11 
  _atom_site_aniso_U_22 
  _atom_site_aniso_U_33 
  _atom_site_aniso_U_23 
  _atom_site_aniso_U_13 
  _atom_site_aniso_U_12 
 Th1 0.01178(12) 0.01177(12) 0.01581(13) 0.00112(12) 0.00626(9) 0.00051(12) 
 C13 0.017(4) 0.017(4) 0.023(4) 0.002(3) 0.013(3) 0.001(3) 
 C12 0.014(3) 0.021(4) 0.022(4) -0.004(3) 0.010(3) 0.001(3) 
 C8 0.023(4) 0.026(4) 0.038(5) 0.005(4) 0.019(4) 0.001(4) 
 C11 0.019(4) 0.019(4) 0.018(4) 0.002(3) 0.008(3) 0.003(3) 
 C15 0.014(4) 0.016(4) 0.022(4) 0.000(3) 0.009(3) 0.001(3) 
 C5 0.021(4) 0.019(4) 0.019(4) 0.008(3) 0.010(3) 0.007(3) 
 C14 0.015(4) 0.018(4) 0.022(4) 0.004(3) 0.010(3) -0.001(3) 
 N2 0.013(3) 0.018(3) 0.009(3) -0.001(2) 0.002(2) 0.002(2) 
 C28 0.024(4) 0.018(4) 0.028(5) -0.006(3) 0.005(4) 0.002(3) 
 C29 0.027(4) 0.023(4) 0.021(4) 0.000(3) 0.011(4) 0.007(3) 
 C19 0.023(4) 0.020(4) 0.020(4) 0.003(3) 0.008(3) -0.002(3) 
 C7 0.019(4) 0.026(5) 0.033(5) 0.009(4) 0.004(4) -0.008(3) 
 C1 0.026(4) 0.017(4) 0.021(4) 0.004(3) 0.015(3) -0.003(3) 
 C3 0.018(4) 0.020(4) 0.021(4) 0.006(3) 0.011(3) -0.001(3) 
 C2 0.016(4) 0.021(4) 0.021(4) 0.006(3) 0.005(3) -0.006(3) 
 C27 0.022(4) 0.015(4) 0.018(4) -0.002(3) 0.005(3) 0.003(3) 
 C16 0.021(4) 0.019(4) 0.029(5) 0.000(3) 0.011(4) 0.003(3) 
 C20 0.021(4) 0.019(4) 0.021(4) -0.002(3) 0.011(3) 0.001(3) 
 C4 0.018(4) 0.021(4) 0.018(4) 0.004(3) 0.011(3) -0.001(3) 
 C18 0.020(4) 0.020(4) 0.028(5) 0.002(3) 0.012(4) -0.003(3) 
 C17 0.016(4) 0.031(5) 0.026(4) -0.003(4) 0.010(3) 0.000(3) 
 C30 0.029(4) 0.016(4) 0.027(5) 0.002(3) 0.010(4) 0.006(3) 
 C6 0.032(5) 0.021(4) 0.025(5) 0.000(3) 0.013(4) -0.001(3) 
 C10 0.019(4) 0.029(5) 0.034(5) 0.013(4) 0.008(4) 0.006(3) 
 C9 0.030(4) 0.036(5) 0.019(4) 0.003(4) 0.011(4) -0.003(4) 
 P1 0.0173(10) 0.0189(10) 0.0177(10) -0.0015(8) 0.0035(8) 0.0042(8) 
 N1 0.010(3) 0.021(3) 0.021(4) 0.002(3) 0.004(3) 0.002(3) 
 C26 0.015(3) 0.017(4) 0.007(3) 0.002(3) 0.001(3) 0.003(3) 
 C21 0.026(4) 0.020(4) 0.010(4) -0.001(3) 0.009(3) -0.002(3) 
 C32 0.017(4) 0.029(5) 0.015(4) 0.000(3) 0.010(3) 0.000(3) 
 C36 0.012(4) 0.028(4) 0.017(4) -0.002(3) 0.001(3) 0.001(3) 
 C22 0.013(4) 0.032(5) 0.020(4) -0.002(4) -0.002(3) 0.001(3) 
 C33 0.018(4) 0.035(5) 0.024(4) 0.000(4) 0.007(3) -0.004(4) 
 C35 0.027(4) 0.026(4) 0.031(5) -0.009(4) 0.014(4) 0.002(4) 
 C25 0.022(5) 0.053(6) 0.029(5) -0.008(5) -0.004(4) 0.011(4) 
 C24 0.030(5) 0.038(5) 0.033(5) -0.010(4) 0.006(4) 0.002(4) 
 C34 0.028(5) 0.035(5) 0.018(4) -0.010(4) 0.002(4) -0.007(4) 
 C23 0.033(5) 0.038(6) 0.051(6) -0.005(5) 0.014(5) -0.018(4) 
 C31 0.032(4) 0.017(4) 0.010(3) 0.001(3) 0.011(3) 0.004(3) 
  
_geom_special_details 
; 
 All esds (except the esd in the dihedral angle between two l.s. planes) 
 are estimated using the full covariance matrix.  The cell esds are taken 
 into account individually in the estimation of esds in distances, angles 
 and torsion angles; correlations between esds in cell parameters are only 
 used when they are defined by crystal symmetry.  An approximate (isotropic) 
 treatment of cell esds is used for estimating esds involving l.s. planes. 
; 
loop_ 
  _geom_bond_atom_site_label_1 
  _geom_bond_atom_site_label_2 
  _geom_bond_distance 
  _geom_bond_site_symmetry_2 
  _geom_bond_publ_flag 
 Th1 C13 2.810(7) . ? 
 Th1 C12 2.838(7) . ? 
 Th1 C11 2.851(7) . ? 
 Th1 C5 2.824(7) . ? 
 Th1 C14 2.838(8) . ? 
 Th1 N2 2.346(6) . ? 
 Th1 C1 2.814(7) . ? 
 Th1 C3 2.829(7) . ? 
 Th1 C2 2.812(7) . ? 
 Th1 C4 2.831(7) . ? 
 Th1 C26 2.458(7) . ? 
 Th1 C21 2.650(8) . ? 
 C13 C12 1.415(11) . ? 
 C13 C14 1.429(11) . ? 
 C13 C18 1.511(10) . ? 
 C12 C11 1.413(11) . ? 
 C12 C17 1.502(10) . ? 
 C8 C3 1.498(11) . ? 
 C11 C15 1.426(11) . ? 
 C11 C16 1.503(11) . ? 
 C15 C14 1.436(11) . ? 
 C15 C20 1.509(11) . ? 
 C5 C1 1.424(11) . ? 
 C5 C4 1.425(11) . ? 
 C5 C10 1.518(11) . ? 
 C14 C19 1.495(11) . ? 
 N2 C27 1.487(9) . ? 
 N2 C26 1.367(9) . ? 
 C28 C27 1.521(11) . ? 
 C29 C27 1.533(11) . ? 
 C7 C2 1.509(11) . ? 
 C1 C2 1.428(11) . ? 
 C1 C6 1.507(11) . ? 
 C3 C2 1.422(11) . ? 
 C3 C4 1.418(11) . ? 
 C27 C30 1.528(11) . ? 
 C4 C9 1.498(11) . ? 
 P1 C26 1.714(7) . ? 
 P1 C31 1.845(8) . ? 
 N1 C21 1.154(10) . ? 
 N1 C22 1.477(10) . ? 
 C32 C33 1.371(11) . ? 
 C32 C31 1.374(11) . ? 
 C36 C35 1.388(11) . ? 
 C36 C31 1.404(10) . ? 
 C22 C25 1.520(12) . ? 
 C22 C24 1.530(12) . ? 
 C22 C23 1.547(13) . ? 
 C33 C34 1.377(12) . ? 
 C35 C34 1.390(12) . ? 
  
loop_ 
  _geom_angle_atom_site_label_1 
  _geom_angle_atom_site_label_2 
  _geom_angle_atom_site_label_3 
  _geom_angle 
  _geom_angle_site_symmetry_1 
  _geom_angle_site_symmetry_3 
  _geom_angle_publ_flag 
 C13 Th1 C12 29.0(2) . . ? 
 C13 Th1 C11 47.7(2) . . ? 
 C13 Th1 C5 129.9(2) . . ? 
 C13 Th1 C14 29.3(2) . . ? 
 C13 Th1 C1 135.3(2) . . ? 
 C13 Th1 C3 171.6(2) . . ? 
 C13 Th1 C2 158.2(2) . . ? 
 C13 Th1 C4 144.3(2) . . ? 
 C12 Th1 C11 28.8(2) . . ? 
 C5 Th1 C12 101.0(2) . . ? 
 C5 Th1 C11 90.7(2) . . ? 
 C5 Th1 C14 138.1(2) . . ? 
 C5 Th1 C3 47.9(2) . . ? 
 C5 Th1 C4 29.2(2) . . ? 
 C14 Th1 C12 48.1(2) . . ? 
 C14 Th1 C11 48.2(2) . . ? 
 N2 Th1 C13 90.6(2) . . ? 
 N2 Th1 C12 116.3(2) . . ? 
 N2 Th1 C11 137.4(2) . . ? 
 N2 Th1 C5 129.8(2) . . ? 
 N2 Th1 C14 91.9(2) . . ? 
 N2 Th1 C1 133.7(2) . . ? 
 N2 Th1 C3 87.4(2) . . ? 
 N2 Th1 C2 105.2(2) . . ? 
 N2 Th1 C4 100.7(2) . . ? 
 N2 Th1 C26 33.0(2) . . ? 
 N2 Th1 C21 81.3(2) . . ? 
 C1 Th1 C12 109.7(2) . . ? 
 C1 Th1 C11 87.6(2) . . ? 
 C1 Th1 C5 29.3(2) . . ? 
 C1 Th1 C14 124.1(2) . . ? 
 C1 Th1 C3 48.2(2) . . ? 
 C1 Th1 C4 48.3(2) . . ? 
 C3 Th1 C12 148.2(2) . . ? 
 C3 Th1 C11 135.2(2) . . ? 
 C3 Th1 C14 158.9(2) . . ? 
 C3 Th1 C4 29.0(2) . . ? 
 C2 Th1 C12 138.5(2) . . ? 
 C2 Th1 C11 113.2(2) . . ? 
 C2 Th1 C5 48.2(2) . . ? 
 C2 Th1 C14 132.8(2) . . ? 
 C2 Th1 C1 29.4(2) . . ? 
 C2 Th1 C3 29.2(2) . . ? 
 C2 Th1 C4 48.1(2) . . ? 
 C4 Th1 C12 120.5(2) . . ? 
 C4 Th1 C11 118.4(2) . . ? 
 C4 Th1 C14 166.5(2) . . ? 
 C26 Th1 C13 98.1(2) . . ? 
 C26 Th1 C12 126.9(2) . . ? 
 C26 Th1 C11 129.6(2) . . ? 
 C26 Th1 C5 132.0(2) . . ? 
 C26 Th1 C14 83.4(2) . . ? 
 C26 Th1 C1 116.1(2) . . ? 
 C26 Th1 C3 84.6(2) . . ? 
 C26 Th1 C2 87.9(2) . . ? 
 C26 Th1 C4 109.8(2) . . ? 
 C26 Th1 C21 114.3(2) . . ? 
 C21 Th1 C13 77.3(2) . . ? 
 C21 Th1 C12 70.5(2) . . ? 
 C21 Th1 C11 95.0(2) . . ? 
 C21 Th1 C5 81.0(2) . . ? 
 C21 Th1 C14 106.5(2) . . ? 
 C21 Th1 C1 110.2(2) . . ? 
 C21 Th1 C3 94.3(2) . . ? 
 C21 Th1 C2 119.3(2) . . ? 
 C21 Th1 C4 71.2(2) . . ? 
 C12 C13 Th1 76.6(4) . . ? 
 C12 C13 C14 108.9(7) . . ? 
 C12 C13 C18 125.3(7) . . ? 
 C14 C13 Th1 76.4(4) . . ? 
 C14 C13 C18 125.3(7) . . ? 
 C18 C13 Th1 119.5(5) . . ? 
 C13 C12 Th1 74.4(4) . . ? 
 C13 C12 C17 127.1(7) . . ? 
 C11 C12 Th1 76.1(4) . . ? 
 C11 C12 C13 108.2(7) . . ? 
 C11 C12 C17 124.0(7) . . ? 
 C17 C12 Th1 123.4(5) . . ? 
 C12 C11 Th1 75.1(4) . . ? 
 C12 C11 C15 108.0(7) . . ? 
 C12 C11 C16 124.3(7) . . ? 
 C15 C11 Th1 75.7(4) . . ? 
 C15 C11 C16 126.6(7) . . ? 
 C16 C11 Th1 124.8(5) . . ? 
 C11 C15 Th1 75.3(4) . . ? 
 C11 C15 C14 108.4(7) . . ? 
 C11 C15 C20 124.9(7) . . ? 
 C14 C15 Th1 74.7(4) . . ? 
 C14 C15 C20 126.2(7) . . ? 
 C20 C15 Th1 122.6(5) . . ? 
 C1 C5 Th1 75.0(4) . . ? 
 C1 C5 C4 108.3(7) . . ? 
 C1 C5 C10 127.5(7) . . ? 
 C4 C5 Th1 75.7(4) . . ? 
 C4 C5 C10 124.1(8) . . ? 
 C10 C5 Th1 118.7(5) . . ? 
 C13 C14 Th1 74.3(4) . . ? 
 C13 C14 C15 106.5(7) . . ? 
 C13 C14 C19 124.9(7) . . ? 
 C15 C14 Th1 76.1(4) . . ? 
 C15 C14 C19 128.2(7) . . ? 
 C19 C14 Th1 120.6(5) . . ? 
 C27 N2 Th1 156.3(5) . . ? 
 C26 N2 Th1 78.0(4) . . ? 
 C26 N2 C27 125.7(6) . . ? 
 C5 C1 Th1 75.8(4) . . ? 
 C5 C1 C2 107.5(7) . . ? 
 C5 C1 C6 127.7(7) . . ? 
 C2 C1 Th1 75.2(4) . . ? 
 C2 C1 C6 124.3(7) . . ? 
 C6 C1 Th1 121.2(5) . . ? 
 C8 C3 Th1 120.3(5) . . ? 
 C2 C3 Th1 74.7(4) . . ? 
 C2 C3 C8 125.9(7) . . ? 
 C4 C3 Th1 75.6(4) . . ? 
 C4 C3 C8 125.6(8) . . ? 
 C4 C3 C2 108.3(7) . . ? 
 C7 C2 Th1 122.1(5) . . ? 
 C1 C2 Th1 75.4(4) . . ? 
 C1 C2 C7 126.2(8) . . ? 
 C3 C2 Th1 76.1(4) . . ? 
 C3 C2 C7 125.1(7) . . ? 
 C3 C2 C1 108.0(7) . . ? 
 N2 C27 C28 108.1(6) . . ? 
 N2 C27 C29 110.3(6) . . ? 
 N2 C27 C30 109.7(6) . . ? 
 C28 C27 C29 109.2(7) . . ? 
 C28 C27 C30 109.1(7) . . ? 
 C30 C27 C29 110.4(6) . . ? 
 C5 C4 Th1 75.1(4) . . ? 
 C5 C4 C9 126.1(7) . . ? 
 C3 C4 Th1 75.4(4) . . ? 
 C3 C4 C5 107.8(7) . . ? 
 C3 C4 C9 125.3(7) . . ? 
 C9 C4 Th1 123.6(5) . . ? 
 C26 P1 C31 102.3(4) . . ? 
 C21 N1 C22 177.6(8) . . ? 
 N2 C26 Th1 69.0(4) . . ? 
 N2 C26 P1 130.9(6) . . ? 
 P1 C26 Th1 159.7(4) . . ? 
 N1 C21 Th1 175.7(7) . . ? 
 C33 C32 C31 122.8(7) . . ? 
 C35 C36 C31 121.0(7) . . ? 
 N1 C22 C25 107.7(7) . . ? 
 N1 C22 C24 107.6(7) . . ? 
 N1 C22 C23 106.0(7) . . ? 
 C25 C22 C24 112.0(7) . . ? 
 C25 C22 C23 112.0(8) . . ? 
 C24 C22 C23 111.2(8) . . ? 
 C32 C33 C34 119.8(8) . . ? 
 C36 C35 C34 119.8(8) . . ? 
 C33 C34 C35 119.5(8) . . ? 
 C32 C31 P1 118.9(6) . . ? 
 C32 C31 C36 117.1(7) . . ? 
 C36 C31 P1 124.0(6) . . ? 
  
_shelx_res_file 
; 
TITL s1 in P21/c #14 
    s1.res 
    created by SHELXL-2017/1 at 15:14:34 on 07-Jul-2019 
REM reset to P21/c #14 
CELL 0.71073 10.0829 33.9805 10.7807 90 107.8389 90 
ZERR 4 0.001 0.0033 0.0011 0 0.0017 0 
LATT 1 
SYMM -X,0.5+Y,0.5-Z 
SFAC C H N P Th 
UNIT 144 212 8 4 4 
  
L.S. 20 
PLAN  40 
TEMP -173.15 
BOND 
fmap 2 
acta 
TWIN 1 0.002 0 -0.044 1 -0.048 0 0.004 1 2 
OMIT 0 2 1 
OMIT 0 2 0 
REM <olex2.extras> 
REM <HklSrc "%.\\s1.hkl"> 
REM </olex2.extras> 
  
WGHT    0.000000   40.921417 
BASF   0.09408 
FVAR       0.06630 
TH1   5    0.131962    0.114768    0.839053    11.00000    0.01178    0.01177 = 
         0.01581    0.00112    0.00626    0.00051 
C13   1    0.295897    0.147536    0.696358    11.00000    0.01724    0.01700 = 
         0.02317    0.00173    0.01338    0.00059 
C12   1    0.380542    0.116892    0.767828    11.00000    0.01446    0.02099 = 
         0.02245   -0.00415    0.00983    0.00071 
C8    1   -0.115041    0.113306    1.045113    11.00000    0.02261    0.02610 = 
         0.03805    0.00453    0.01871    0.00114 
AFIX 137 
H8A   2   -0.068548    0.133049    1.110180    11.00000   -1.50000 
H8B   2   -0.175396    0.096894    1.079782    11.00000   -1.50000 
H8C   2   -0.171354    0.126546    0.965667    11.00000   -1.50000 
AFIX   0 
C11   1    0.318849    0.080573    0.717562    11.00000    0.01873    0.01922 = 
         0.01791    0.00195    0.00828    0.00286 
C15   1    0.196226    0.088704    0.612212    11.00000    0.01378    0.01600 = 
         0.02244   -0.00038    0.00921    0.00056 
C5    1    0.198011    0.055860    1.033193    11.00000    0.02117    0.01941 = 
         0.01879    0.00780    0.01027    0.00679 
C14   1    0.180844    0.130637    0.598311    11.00000    0.01465    0.01840 = 
         0.02204    0.00396    0.00963   -0.00136 
N2    3    0.016649    0.175025    0.833343    11.00000    0.01273    0.01774 = 
         0.00940   -0.00135    0.00229    0.00212 
C28   1    0.132665    0.228795    0.974409    11.00000    0.02443    0.01819 = 
         0.02780   -0.00551    0.00490    0.00220 
AFIX 137 
H28A  2    0.151739    0.211049    1.049491    11.00000   -1.50000 
H28B  2    0.122491    0.255761    1.002427    11.00000   -1.50000 
H28C  2    0.210048    0.227678    0.937380    11.00000   -1.50000 
AFIX   0 
C29   1   -0.122324    0.218774    0.929609    11.00000    0.02737    0.02342 = 
         0.02087   -0.00004    0.01143    0.00682 
AFIX 137 
H29A  2   -0.207680    0.209052    0.865789    11.00000   -1.50000 
H29B  2   -0.135546    0.246215    0.951192    11.00000   -1.50000 
H29C  2   -0.101149    0.202686    1.008728    11.00000   -1.50000 
AFIX   0 
C19   1    0.077115    0.153346    0.493932    11.00000    0.02303    0.01997 = 
         0.01988    0.00337    0.00808   -0.00167 
AFIX 137 
H19A  2    0.003922    0.135543    0.443495    11.00000   -1.50000 
H19B  2    0.123896    0.165443    0.436098    11.00000   -1.50000 
H19C  2    0.035523    0.173939    0.533774    11.00000   -1.50000 
AFIX   0 
C7    1   -0.176609    0.047395    0.826964    11.00000    0.01912    0.02631 = 
         0.03282    0.00876    0.00378   -0.00822 
AFIX 137 
H7A   2   -0.228725    0.071106    0.789115    11.00000   -1.50000 
H7B   2   -0.226901    0.033238    0.877879    11.00000   -1.50000 
H7C   2   -0.166702    0.030356    0.756994    11.00000   -1.50000 
AFIX   0 
C1    1    0.093494    0.038821    0.926341    11.00000    0.02558    0.01665 = 
         0.02139    0.00356    0.01510   -0.00269 
C3    1   -0.007780    0.087978    1.014101    11.00000    0.01794    0.01965 = 
         0.02099    0.00635    0.01109   -0.00102 
C2    1   -0.034198    0.058921    0.914573    11.00000    0.01637    0.02138 = 
         0.02089    0.00588    0.00509   -0.00619 
C27   1   -0.001205    0.216221    0.871896    11.00000    0.02192    0.01500 = 
         0.01804   -0.00235    0.00479    0.00264 
C16   1    0.388471    0.041258    0.752560    11.00000    0.02095    0.01936 = 
         0.02885   -0.00004    0.01146    0.00283 
AFIX 137 
H16A  2    0.423278    0.038641    0.847592    11.00000   -1.50000 
H16B  2    0.466472    0.039220    0.716603    11.00000   -1.50000 
H16C  2    0.321074    0.020271    0.716314    11.00000   -1.50000 
AFIX   0 
C20   1    0.110309    0.058209    0.520419    11.00000    0.02085    0.01855 = 
         0.02134   -0.00242    0.01073    0.00088 
AFIX 137 
H20A  2    0.171581    0.041684    0.487234    11.00000   -1.50000 
H20B  2    0.042209    0.071380    0.447392    11.00000   -1.50000 
H20C  2    0.061356    0.041765    0.567033    11.00000   -1.50000 
AFIX   0 
C4    1    0.135418    0.086344    1.086911    11.00000    0.01822    0.02089 = 
         0.01784    0.00438    0.01094   -0.00127 
C18   1    0.331283    0.190855    0.710236    11.00000    0.02009    0.01953 = 
         0.02817    0.00195    0.01175   -0.00269 
AFIX 137 
H18A  2    0.245185    0.206349    0.683993    11.00000   -1.50000 
H18B  2    0.388566    0.197618    0.654481    11.00000   -1.50000 
H18C  2    0.383046    0.196689    0.801234    11.00000   -1.50000 
AFIX   0 
C17   1    0.523132    0.120806    0.864774    11.00000    0.01574    0.03068 = 
         0.02595   -0.00328    0.01024    0.00003 
AFIX 137 
H17A  2    0.536447    0.147799    0.898320    11.00000   -1.50000 
H17B  2    0.593745    0.114717    0.822213    11.00000   -1.50000 
H17C  2    0.532231    0.102454    0.937037    11.00000   -1.50000 
AFIX   0 
C30   1   -0.027626    0.243219    0.753419    11.00000    0.02850    0.01623 = 
         0.02659    0.00236    0.01004    0.00584 
AFIX 137 
H30A  2    0.053042    0.242508    0.720850    11.00000   -1.50000 
H30B  2   -0.042211    0.270208    0.778535    11.00000   -1.50000 
H30C  2   -0.110650    0.234254    0.684897    11.00000   -1.50000 
AFIX   0 
C6    1    0.105785    0.002756    0.849311    11.00000    0.03164    0.02135 = 
         0.02543   -0.00023    0.01325   -0.00134 
AFIX 137 
H6A   2    0.067765    0.008438    0.755975    11.00000   -1.50000 
H6B   2    0.053519   -0.018949    0.871990    11.00000   -1.50000 
H6C   2    0.204065   -0.004680    0.869863    11.00000   -1.50000 
AFIX   0 
C10   1    0.348766    0.042988    1.089632    11.00000    0.01887    0.02857 = 
         0.03387    0.01271    0.00808    0.00633 
AFIX 137 
H10A  2    0.366287    0.020373    1.040440    11.00000   -1.50000 
H10B  2    0.366946    0.035544    1.181159    11.00000   -1.50000 
H10C  2    0.410369    0.064739    1.083725    11.00000   -1.50000 
AFIX   0 
C9    1    0.201867    0.107929    1.211633    11.00000    0.02995    0.03573 = 
         0.01904    0.00262    0.01111   -0.00300 
AFIX 137 
H9A   2    0.303458    0.106255    1.233335    11.00000   -1.50000 
H9B   2    0.172435    0.096056    1.281790    11.00000   -1.50000 
H9C   2    0.173189    0.135600    1.201389    11.00000   -1.50000 
AFIX   0 
P1    4   -0.248981    0.164359    0.653718    11.00000    0.01730    0.01894 = 
         0.01772   -0.00146    0.00352    0.00417 
N1    3    0.419193    0.166973    1.099876    11.00000    0.01043    0.02067 = 
         0.02120    0.00245    0.00439    0.00213 
C26   1   -0.080718    0.153448    0.742713    11.00000    0.01466    0.01657 = 
         0.00693    0.00215    0.00093    0.00279 
C21   1    0.328298    0.152543    1.020526    11.00000    0.02562    0.02023 = 
         0.01022   -0.00054    0.00862   -0.00233 
C32   1   -0.446411    0.107609    0.536162    11.00000    0.01708    0.02931 = 
         0.01473    0.00008    0.00987    0.00028 
AFIX  43 
H32   2   -0.508758    0.125517    0.556999    11.00000   -1.20000 
AFIX   0 
C36   1   -0.220003    0.091268    0.530188    11.00000    0.01204    0.02783 = 
         0.01699   -0.00237    0.00126    0.00087 
AFIX  43 
H36   2   -0.124124    0.097509    0.548085    11.00000   -1.20000 
AFIX   0 
C22   1    0.532715    0.187089    1.199762    11.00000    0.01265    0.03237 = 
         0.02035   -0.00191   -0.00215    0.00102 
C33   1   -0.498008    0.072626    0.477754    11.00000    0.01770    0.03489 = 
         0.02374   -0.00021    0.00702   -0.00422 
AFIX  43 
H33   2   -0.593708    0.066365    0.461118    11.00000   -1.20000 
AFIX   0 
C35   1   -0.270625    0.055957    0.469134    11.00000    0.02683    0.02617 = 
         0.03066   -0.00946    0.01407    0.00159 
AFIX  43 
H35   2   -0.209763    0.038261    0.445121    11.00000   -1.20000 
AFIX   0 
C25   1    0.652220    0.158076    1.247799    11.00000    0.02232    0.05340 = 
         0.02899   -0.00750   -0.00425    0.01057 
AFIX 137 
H25A  2    0.618651    0.134203    1.279509    11.00000   -1.50000 
H25B  2    0.726449    0.170032    1.318824    11.00000   -1.50000 
H25C  2    0.688621    0.151285    1.176040    11.00000   -1.50000 
AFIX   0 
C24   1    0.474863    0.200114    1.308885    11.00000    0.03009    0.03754 = 
         0.03280   -0.01030    0.00638    0.00183 
AFIX 137 
H24A  2    0.394600    0.217461    1.272958    11.00000   -1.50000 
H24B  2    0.547216    0.214292    1.375623    11.00000   -1.50000 
H24C  2    0.445716    0.176931    1.347975    11.00000   -1.50000 
AFIX   0 
C34   1   -0.410707    0.046590    0.443271    11.00000    0.02759    0.03479 = 
         0.01754   -0.00979    0.00225   -0.00677 
AFIX  43 
H34   2   -0.445957    0.022398    0.402097    11.00000   -1.20000 
AFIX   0 
C23   1    0.573671    0.222975    1.131023    11.00000    0.03257    0.03765 = 
         0.05114   -0.00532    0.01415   -0.01828 
AFIX 137 
H23A  2    0.609736    0.213829    1.061347    11.00000   -1.50000 
H23B  2    0.645664    0.238273    1.194427    11.00000   -1.50000 
H23C  2    0.491552    0.239550    1.093758    11.00000   -1.50000 
AFIX   0 
PART 2 
C31   1   -0.308403    0.117879    0.565856    11.00000    0.03203    0.01748 = 
         0.01014    0.00053    0.01107    0.00379 
HKLF 4 
  
  
  
  
REM  s1 in P21/c #14 
REM R1 =  0.0594 for    7213 Fo > 4sig(Fo)  and  0.0747 for all    8492 data 
REM    378 parameters refined using      0 restraints 
  
END 
  
WGHT      0.0000     40.9314 
  
REM Highest difference peak  2.692,  deepest hole -5.578,  1-sigma level  0.193 
Q1    1   0.1801  0.1137  0.9230  11.00000  0.05    2.69 
Q2    1   0.0963  0.1131  0.7490  11.00000  0.05    2.43 
Q3    1   0.6609  0.1144  1.1910  11.00000  0.05    2.21 
Q4    1  -0.4384  0.1010  0.4406  11.00000  0.05    1.62 
Q5    1  -0.4194  0.1085  0.4244  11.00000  0.05    1.43 
Q6    1  -0.4362  0.1233  0.4219  11.00000  0.05    1.36 
Q7    1   0.1331  0.0879  0.8365  11.00000  0.05    1.35 
Q8    1  -0.3738  0.1016  0.5407  11.00000  0.05    1.32 
Q9    1   0.1390  0.1468  0.8520  11.00000  0.05    1.05 
Q10   1   0.1366  0.0713  0.8413  11.00000  0.05    1.04 
Q11   1  -0.0780  0.1600  0.6188  11.00000  0.05    1.01 
Q12   1  -0.3930  0.1252  0.5416  11.00000  0.05    0.95 
Q13   1  -0.0626  0.1430  0.6970  11.00000  0.05    0.90 
Q14   1   0.3966  0.1607  1.0061  11.00000  0.05    0.89 
Q15   1  -0.1326  0.1656  0.7236  11.00000  0.05    0.88 
Q16   1  -0.1813  0.1415  0.6166  11.00000  0.05    0.88 
Q17   1  -0.0275  0.1116  0.6725  11.00000  0.05    0.88 
Q18   1  -0.1176  0.0696  0.6804  11.00000  0.05    0.86 
Q19   1   0.2790  0.1108  1.0133  11.00000  0.05    0.85 
Q20   1  -0.1757  0.1707  0.6156  11.00000  0.05    0.84 
Q21   1   0.1496  0.0389  0.8269  11.00000  0.05    0.80 
Q22   1   0.2683  0.0506  1.0019  11.00000  0.05    0.75 
Q23   1  -0.0548  0.1501  0.7865  11.00000  0.05    0.73 
Q24   1   0.0280  0.0861  0.8163  11.00000  0.05    0.73 
Q25   1  -0.4613  0.1082  0.5803  11.00000  0.05    0.72 
Q26   1  -0.2306  0.0635  0.5411  11.00000  0.05    0.71 
Q27   1  -0.1530  0.0692  0.6355  11.00000  0.05    0.69 
Q28   1  -0.2612  0.1264  0.5583  11.00000  0.05    0.69 
Q29   1   0.0131  0.1673  0.7356  11.00000  0.05    0.69 
Q30   1  -0.0261  0.1659  0.6011  11.00000  0.05    0.67 
Q31   1   0.2610  0.1328  0.8583  11.00000  0.05    0.66 
Q32   1   0.2698  0.1693  1.0147  11.00000  0.05    0.65 
Q33   1   0.0141  0.1991  0.8461  11.00000  0.05    0.64 
Q34   1   0.2430  0.1671  0.9123  11.00000  0.05    0.64 
Q35   1  -0.2142  0.0684  0.3577  11.00000  0.05    0.63 
Q36   1   0.3566  0.1528  1.0793  11.00000  0.05    0.62 
Q37   1   0.1437 -0.0496  0.8377  11.00000  0.05    0.61 
Q38   1   0.3808  0.0956  0.7160  11.00000  0.05    0.60 
Q39   1   0.5810  0.1179  1.0755  11.00000  0.05    0.59 
Q40   1  -0.0780  0.1763  0.6722  11.00000  0.05    0.59 
; 
_shelx_res_checksum                54377 
_shelx_hkl_file 
; 
   2   0   0    0.24    0.60 
  -2   0   0    1.43    0.72 
  -2   0   0    2.08    0.78 
   2   0   0    2.81    0.67 
   2   0   0    1.33    0.67 
   2   0   0    1.45    0.70 
  -2   0   0    0.82    0.62 
  -2   0   0    2.70    0.64 
   2   0   0    1.90    0.85 
   2   0   0    1.36    0.78 
   2   0   0    1.61    0.79 
  -2   0   0    1.64    0.81 
  -2   0   0    1.10    0.66 
  -2   0   0    1.45    0.76 
  -2   0   0    0.17    0.72 
  -2   0   0    0.96    0.68 
   2   0   0   -0.09    0.67 
   2   0   0    1.36    0.68 
  -3   0   0  254.92   10.51 
  -3   0   0  279.08   10.82 
   3   0   0  261.82   10.69 
   3   0   0  270.77   10.79 
   3   0   0  261.17   10.67 
  -3   0   0  260.40   10.65 
  -3   0   0  252.23   10.56 
  -3   0   0  269.93   10.68 
   3   0   0  242.68   10.51 
   3   0   0  290.15   10.83 
   3   0   0  257.10   10.64 
   3   0   0  263.75   10.59 
   4   0   0  278.99   11.89 
   4   0   0  319.24   12.31 
  -4   0   0  298.88   12.00 
  -4   0   0  298.45   12.09 
   4   0   0  292.66   12.01 
  -4   0   0  305.81   12.26 
   4   0   0  293.87   12.07 
   4   0   0  288.62   12.12 
   4   0   0  297.52   12.13 
   4   0   0  297.79   12.29 
   5   0   0   68.72    3.65 
  -5   0   0   67.47    3.46 
  -5   0   0   67.99    3.59 
  -5   0   0   75.80    3.84 
   5   0   0   73.96    3.95 
   5   0   0   64.03    3.66 
   5   0   0   71.94    3.71 
   5   0   0   75.78    3.91 
   6   0   0   23.91    2.16 
  -6   0   0   29.94    2.57 
   6   0   0   25.42    2.27 
  -6   0   0   24.24    2.01 
   6   0   0   28.74    2.59 
   6   0   0   27.42    2.28 
  -6   0   0   24.95    2.07 
  -6   0   0   25.19    2.19 
  -7   0   0  156.98    6.57 
   7   0   0  146.63    6.54 
   7   0   0  143.03    6.78 
   7   0   0  147.62    6.87 
   7   0   0  140.43    6.85 
  -7   0   0  138.44    6.84 
   7   0   0  150.62    7.42 
  -7   0   0  137.68    6.62 
  -7   0   0  146.24    7.21 
   8   0   0  156.10    7.93 
  -8   0   0  153.38    7.71 
  -8   0   0  155.25    6.90 
   8   0   0  160.79    6.97 
  -8   0   0  134.71    7.01 
   8   0   0  154.43    7.36 
  -8   0   0  149.92    7.35 
  -8   0   0  145.06    7.38 
   8   0   0  146.91    7.43 
   8   0   0  148.77    7.39 
   9   0   0   41.41    4.53 
  -9   0   0   36.63    3.34 
  -9   0   0   40.10    3.85 
   9   0   0   38.91    3.83 
  -9   0   0   42.46    3.86 
  -9   0   0   40.76    4.06 
   9   0   0   41.57    3.88 
   9   0   0   44.55    3.95 
  10   0   0   14.69    3.08 
  10   0   0   10.44    3.63 
 -10   0   0   17.39    3.16 
  10   0   0   14.56    3.26 
 -10   0   0   12.70    3.09 
 -10   0   0   13.87    3.09 
 -11   0   0   58.52    5.76 
  11   0   0   64.68    6.00 
 -11   0   0   57.76    5.52 
  11   0   0   52.61    6.01 
 -11   0   0   51.95    5.20 
 -12   0   0   43.44    5.26 
  12   0   0   31.40    5.95 
  12   0   0   27.08    5.66 
 -12   0   0   19.35    4.19 
 -12   0   0   23.60    4.46 
 -12   0   0   23.44    5.02 
   0  -1   0   -0.02    0.02 
   0  -1   0   -0.01    0.02 
   0   1   0   -0.03    0.02 
   0   1   0   -0.02    0.03 
   2  -1   0  158.58    6.85 
  -2  -1   0  164.84    6.91 
  -2  -1   0  183.86    6.97 
   2  -1   0  181.23    7.03 
   2  -1   0  181.94    7.04 
   2  -1   0  166.13    6.98 
  -2  -1   0  167.47    6.89 
   2  -1   0  169.47    6.97 
   2  -1   0  163.21    6.91 
  -2  -1   0  168.97    6.89 
  -2  -1   0  178.81    7.05 
  -2  -1   0  182.66    7.07 
  -2  -1   0  173.89    6.93 
   2  -1   0  164.35    6.84 
   2  -1   0  164.91    6.94 
   2  -1   0  182.24    6.96 
  -2   1   0  164.02    6.85 
  -2   1   0  185.82    7.04 
  -2   1   0  166.36    7.00 
  -2   1   0  172.85    6.97 
  -2   1   0  167.48    6.93 
   2   1   0  170.61    6.95 
  -2   1   0  173.08    6.99 
  -2   1   0  170.51    6.91 
   2   1   0  174.88    7.05 
  -2   1   0  165.82    6.83 
   2   1   0  166.09    6.88 
   2   1   0  172.99    6.97 
   2   1   0  166.45    6.89 
   2   1   0  186.34    7.11 
  -2   1   0  159.28    6.81 
   2   1   0  170.39    6.91 
   2   1   0  161.25    6.92 
   2   1   0  159.42    6.83 
  -2   1   0  171.20    6.93 
  -3  -1   0   78.10    3.61 
   3  -1   0   82.25    3.66 
   3  -1   0   72.07    3.44 
  -3  -1   0   70.82    3.46 
   3  -1   0   72.23    3.51 
  -3  -1   0   75.21    3.49 
   3  -1   0   75.97    3.53 
  -3  -1   0   73.74    3.38 
   3  -1   0   75.76    3.53 
   3  -1   0   69.15    3.30 
   3  -1   0   77.16    3.34 
   3   1   0   69.76    3.29 
  -3   1   0   74.35    3.32 
  -3   1   0   72.92    3.29 
  -3   1   0   72.93    3.25 
  -3   1   0   76.24    3.53 
  -3   1   0   74.95    3.44 
   3   1   0   77.87    3.58 
   3   1   0   74.41    3.46 
   3   1   0   76.04    3.42 
   3   1   0   73.15    3.40 
   3   1   0   75.67    3.50 
   3   1   0   77.77    3.64 
   4  -1   0    6.83    1.35 
   4  -1   0    5.10    1.11 
   4  -1   0    6.12    1.33 
   4  -1   0    3.02    1.14 
  -4  -1   0    5.20    1.05 
  -4  -1   0    4.24    1.12 
   4  -1   0    6.77    1.25 
  -4  -1   0    3.42    1.16 
   4  -1   0    7.91    1.05 
   4  -1   0    8.03    1.14 
   4   1   0    8.04    1.44 
   4   1   0    3.69    1.05 
   4   1   0    4.63    1.22 
   4   1   0    8.07    1.19 
   4   1   0    3.68    1.10 
  -4   1   0    8.29    1.22 
   4   1   0    5.76    1.14 
  -4   1   0    4.98    0.97 
  -4   1   0    6.84    1.11 
   5  -1   0  190.22    8.31 
   5  -1   0  196.23    8.68 
   5  -1   0  216.95    8.95 
   5  -1   0  199.65    8.77 
   5  -1   0  204.12    8.62 
  -5  -1   0  199.33    8.47 
  -5  -1   0  206.53    8.57 
  -5  -1   0  207.33    8.79 
   5  -1   0  197.77    8.44 
   5   1   0  198.37    8.54 
  -5   1   0  204.60    8.53 
   5   1   0  203.85    8.83 
  -5   1   0  191.64    8.38 
  -5   1   0  200.34    8.69 
   5   1   0  205.62    8.61 
   5   1   0  199.53    8.56 
   5   1   0  205.49    8.77 
  -6  -1   0   60.20    3.56 
   6  -1   0   62.55    3.73 
  -6  -1   0   66.65    3.25 
  -6  -1   0   68.27    3.96 
  -6  -1   0   61.83    3.46 
   6  -1   0   68.57    3.67 
   6  -1   0   65.84    3.91 
   6  -1   0   60.52    3.54 
  -6   1   0   66.37    3.24 
  -6   1   0   60.69    3.37 
   6   1   0   58.45    3.97 
   6   1   0   63.02    3.58 
  -6   1   0   63.15    3.80 
   6   1   0   64.30    3.86 
   6   1   0   58.77    3.60 
   6   1   0   64.44    3.36 
   6   1   0   62.42    3.61 
  -6   1   0   64.09    3.56 
  -7  -1   0    6.58    1.61 
   7  -1   0    8.60    1.76 
   7  -1   0   12.97    2.28 
  -7  -1   0    3.74    1.53 
  -7  -1   0    5.24    1.39 
   7  -1   0    9.18    1.61 
  -7  -1   0    4.94    1.87 
   7  -1   0    9.03    1.82 
   7  -1   0   11.69    2.00 
   7   1   0    9.64    1.87 
   7   1   0    9.69    2.25 
  -7   1   0    7.68    1.66 
   7   1   0    4.70    1.70 
   7   1   0    7.16    1.46 
  -7   1   0    9.95    1.60 
  -7   1   0    8.12    1.91 
  -7   1   0    5.13    1.66 
  -7   1   0    7.98    1.51 
   7   1   0    5.96    1.64 
  -8  -1   0   14.02    2.52 
   8  -1   0   18.66    2.67 
   8  -1   0   15.39    2.11 
   8  -1   0   17.60    2.81 
   8  -1   0   15.34    2.30 
  -8  -1   0    9.73    2.23 
  -8  -1   0   13.63    1.86 
   8  -1   0   14.25    2.33 
  -8  -1   0   11.27    2.06 
   8   1   0   13.58    2.28 
  -8   1   0   16.39    2.58 
   8   1   0   12.47    2.00 
  -8   1   0   17.75    2.40 
  -8   1   0   11.96    1.96 
  -8   1   0   14.73    2.03 
   8   1   0   14.18    2.84 
   8   1   0   10.65    2.19 
  -8   1   0   13.02    2.25 
   8   1   0   11.31    2.38 
  -9  -1   0   21.58    2.94 
   9  -1   0   17.05    3.13 
   9  -1   0   14.25    3.55 
  -9  -1   0   20.48    3.27 
   9  -1   0   20.55    2.86 
  -9  -1   0   18.03    2.76 
  -9  -1   0   16.62    2.64 
   9  -1   0   21.53    2.86 
  -9   1   0   17.25    2.88 
   9   1   0   17.11    3.52 
   9   1   0   17.48    2.88 
  -9   1   0   16.31    2.49 
  -9   1   0   19.17    3.15 
   9   1   0   20.01    3.03 
   9   1   0   22.31    2.94 
  -9   1   0   18.66    2.88 
  10  -1   0   31.35    4.66 
 -10  -1   0   34.20    3.91 
  10  -1   0   34.71    4.15 
  10  -1   0   35.15    3.92 
  10  -1   0   33.72    4.05 
 -10  -1   0   35.29    4.02 
 -10  -1   0   37.83    4.19 
  10   1   0   36.70    3.89 
  10   1   0   36.19    4.08 
 -10   1   0   34.97    4.13 
 -10   1   0   31.05    3.84 
  10   1   0   47.68    5.08 
 -10   1   0   34.89    3.88 
  11  -1   0    7.71    3.97 
 -11  -1   0    7.48    3.22 
 -11  -1   0    9.25    3.18 
 -11  -1   0    1.44    3.05 
  11  -1   0    7.02    3.39 
 -11   1   0   13.45    3.41 
 -11   1   0    9.15    3.16 
  11   1   0    6.16    3.86 
  11   1   0   15.97    3.74 
  11   1   0    5.36    3.38 
 -11   1   0    8.68    3.25 
 -12  -1   0    5.29    3.47 
  12  -1   0    7.47    4.43 
 -12  -1   0    4.54    3.37 
 -12  -1   0    9.24    3.48 
 -12  -1   0    6.95    4.01 
  12  -1   0   14.63    3.82 
 -12   1   0   10.81    3.75 
  12   1   0    5.10    4.41 
  12   1   0   12.93    3.80 
 -12   1   0   11.01    3.71 
 -12   1   0   13.01    3.89 
 -12   1   0   -1.16    3.75 
   0  -2   0    0.04    0.05 
   0  -2   0   -0.13    0.12 
   0  -2   0   -0.13    0.14 
   0  -2   0    0.00    0.14 
   0  -2   0    0.03    0.10 
   0  -2   0    0.06    0.04 
   0  -2   0   -0.02    0.05 
   0   2   0    0.25    0.17 
   0   2   0    0.50    0.15 
   0   2   0   -0.12    0.21 
   0   2   0    0.02    0.05 
   0   2   0    0.03    0.03 
   0   2   0    0.02    0.05 
   0   2   0   -0.04    0.04 
  -1  -2   0    9.58    0.76 
  -1  -2   0    6.59    0.61 
   1  -2   0    6.42    0.51 
  -1  -2   0    8.26    0.61 
   1  -2   0    7.30    0.60 
   1  -2   0    5.80    0.53 
  -1   2   0    6.81    0.58 
  -1   2   0    4.87    0.47 
  -1   2   0    6.72    0.52 
  -1   2   0    7.24    0.67 
  -1   2   0    6.20    0.71 
   1   2   0    8.75    0.66 
  -1   2   0    7.37    0.62 
   1   2   0    7.19    0.59 
   1   2   0    9.36    0.77 
  -2  -2   0   26.41    1.51 
  -2  -2   0   23.34    1.49 
   2  -2   0   20.41    1.45 
   2  -2   0   23.00    1.60 
  -2  -2   0   24.13    1.67 
  -2  -2   0   22.76    1.41 
   2  -2   0   22.05    1.68 
  -2  -2   0   24.69    1.43 
   2  -2   0   21.76    1.54 
   2  -2   0   24.48    1.51 
  -2  -2   0   25.08    1.66 
   2  -2   0   19.14    1.45 
   2  -2   0   20.91    1.42 
  -2  -2   0   23.30    1.49 
  -2   2   0   23.63    1.46 
  -2   2   0   22.78    1.52 
   2   2   0   27.87    1.55 
   2   2   0   28.05    1.35 
   2   2   0   22.74    1.50 
   2   2   0   21.28    1.46 
  -2   2   0   21.77    1.45 
  -2   2   0   24.81    1.61 
  -2   2   0   22.97    1.49 
   2   2   0   23.67    1.67 
  -2   2   0   20.11    1.45 
  -2   2   0   24.75    1.73 
  -2   2   0   23.56    1.49 
   2   2   0   26.31    1.78 
   3  -2   0   23.45    1.85 
  -3  -2   0   22.52    1.67 
   3  -2   0   21.94    1.60 
  -3  -2   0   19.25    1.60 
   3  -2   0   20.02    1.79 
   3  -2   0   20.61    1.55 
   3  -2   0   19.65    1.46 
   3  -2   0   20.20    1.60 
  -3  -2   0   23.17    1.93 
   3  -2   0   19.03    1.45 
  -3   2   0   19.15    1.39 
   3   2   0   19.79    1.49 
   3   2   0   20.42    1.66 
  -3   2   0   21.26    1.34 
   3   2   0   21.94    1.69 
   3   2   0   19.76    1.72 
  -3   2   0   21.70    1.52 
  -3   2   0   20.31    1.68 
   3   2   0   27.24    1.94 
  -3   2   0   19.22    1.64 
  -3   2   0   20.37    1.62 
   4  -2   0   29.08    2.29 
   4  -2   0   24.77    1.83 
  -4  -2   0   29.00    2.25 
   4  -2   0   28.03    2.20 
   4  -2   0   22.57    1.94 
  -4  -2   0   24.74    1.98 
   4  -2   0   26.77    2.07 
   4  -2   0   28.28    1.85 
   4  -2   0   26.09    2.12 
  -4  -2   0   27.21    1.94 
   4   2   0   27.68    2.08 
   4   2   0   28.17    2.05 
   4   2   0   27.42    1.89 
   4   2   0   27.82    2.33 
  -4   2   0   26.69    2.02 
  -4   2   0   24.14    1.73 
  -4   2   0   29.16    1.97 
   4   2   0   28.16    2.11 
  -4   2   0   29.61    2.11 
   5  -2   0    4.77    1.54 
   5  -2   0    4.95    1.14 
  -5  -2   0    3.26    1.30 
   5  -2   0    5.04    1.18 
   5  -2   0    5.42    1.28 
  -5  -2   0    2.64    1.10 
  -5  -2   0    3.84    1.19 
   5  -2   0    2.81    1.19 
   5  -2   0    3.47    1.36 
  -5   2   0    4.79    1.02 
   5   2   0    4.43    1.45 
  -5   2   0    4.90    1.30 
   5   2   0    2.74    1.19 
   5   2   0    2.57    1.46 
  -5   2   0    0.85    1.04 
  -5   2   0    4.52    1.17 
   5   2   0    6.91    1.33 
   5   2   0    2.51    1.07 
   6  -2   0    0.23    1.30 
   6  -2   0    0.89    1.43 
   6  -2   0    2.68    1.52 
   6  -2   0    1.23    1.25 
  -6  -2   0    1.91    1.24 
  -6  -2   0    4.84    1.59 
   6  -2   0    3.14    1.31 
   6  -2   0    2.01    1.32 
  -6  -2   0    2.05    1.26 
  -6   2   0    1.01    1.29 
   6   2   0    3.61    1.37 
   6   2   0    1.80    1.34 
  -6   2   0    1.61    1.36 
   6   2   0    1.35    1.09 
   6   2   0    4.81    1.67 
  -6   2   0    2.80    1.28 
  -6   2   0    2.78    1.15 
   6   2   0    1.64    1.49 
   6   2   0    1.15    1.26 
   7  -2   0    2.62    1.55 
  -7  -2   0    1.03    1.71 
   7  -2   0    3.35    1.76 
  -7  -2   0   -0.63    1.18 
   7  -2   0    1.98    1.63 
  -7  -2   0   -0.35    1.41 
   7  -2   0    3.07    1.65 
  -7  -2   0    3.49    1.55 
  -7   2   0    1.77    1.52 
  -7   2   0    1.98    1.49 
  -7   2   0    1.07    1.27 
   7   2   0    2.84    1.92 
  -7   2   0   -0.38    1.52 
   7   2   0    0.07    1.54 
  -7   2   0   -0.27    1.21 
   7   2   0    2.11    1.55 
   7   2   0    2.46    1.49 
   7   2   0    2.12    1.31 
  -8  -2   0   -0.42    1.99 
   8  -2   0    2.61    1.77 
   8  -2   0    0.83    1.71 
   8  -2   0    1.38    1.93 
   8  -2   0    0.64    1.93 
   8  -2   0   -0.29    2.17 
  -8  -2   0    0.84    1.50 
  -8  -2   0   -0.22    1.64 
  -8  -2   0    3.73    1.81 
  -8   2   0    0.54    1.75 
  -8   2   0    1.40    1.67 
  -8   2   0   -1.32    1.78 
   8   2   0    4.11    2.24 
   8   2   0    2.09    1.85 
   8   2   0    3.68    1.77 
  -8   2   0   -0.70    1.82 
   8   2   0    1.03    1.86 
  -8   2   0    2.00    1.51 
   9  -2   0    1.81    2.09 
  -9  -2   0    4.10    2.37 
   9  -2   0    0.95    2.15 
   9  -2   0    4.70    2.88 
  -9  -2   0    4.91    2.42 
   9  -2   0    1.54    2.38 
  -9  -2   0   -1.35    1.73 
   9   2   0    3.09    2.08 
  -9   2   0    5.02    2.33 
  -9   2   0    2.54    2.20 
   9   2   0   -0.84    1.99 
  -9   2   0    1.27    2.00 
   9   2   0    0.13    2.64 
   9   2   0   -0.93    2.28 
  -9   2   0   -1.75    2.14 
  10  -2   0    4.62    3.00 
 -10  -2   0   -0.33    2.41 
  10  -2   0    1.52    2.42 
 -10  -2   0    4.26    2.51 
 -10  -2   0    4.54    2.68 
  10  -2   0    3.48    3.25 
 -10   2   0    6.24    2.62 
  10   2   0    1.85    2.44 
  10   2   0    4.74    3.25 
  10   2   0    6.08    2.87 
 -10   2   0    0.51    2.57 
 -10   2   0    2.81    2.54 
 -11  -2   0    2.64    3.32 
  11  -2   0    4.06    3.79 
 -11  -2   0    1.56    3.01 
  11  -2   0    0.13    3.26 
 -11  -2   0   -0.25    2.88 
  11   2   0    3.87    2.90 
  11   2   0   -0.74    3.62 
 -11   2   0    0.36    2.61 
 -11   2   0    1.29    2.78 
 -11   2   0   -4.06    2.35 
  11   2   0    0.57    3.15 
 -12  -2   0    8.48    3.84 
 -12  -2   0   -1.38    3.27 
 -12  -2   0    0.12    3.09 
  12  -2   0    1.56    4.09 
  12  -2   0    1.60    3.14 
 -12  -2   0    3.85    3.33 
 -12   2   0    5.84    3.34 
 -12   2   0   -3.09    4.07 
  12   2   0    0.05    3.16 
  12   2   0    6.97    4.16 
 -12   2   0    3.91    3.25 
   0  -3   0    0.08    0.30 
   0  -3   0    0.63    0.29 
   0  -3   0    0.10    0.21 
   0  -3   0    0.13    0.27 
   0  -3   0   -0.20    0.21 
   0  -3   0    0.10    0.24 
   0  -3   0    0.30    0.22 
   0   3   0   -0.25    0.17 
   0   3   0   -0.06    0.28 
   0   3   0    0.08    0.18 
   0   3   0    0.08    0.20 
   0   3   0    1.04    0.47 
   0   3   0   -0.30    0.17 
   0   3   0    0.38    0.35 
  -1  -3   0  302.02   10.92 
  -1  -3   0  291.59   10.83 
  -1  -3   0  241.19   10.81 
   1  -3   0  279.05   10.78 
  -1  -3   0  280.96   10.77 
   1  -3   0  272.32   10.73 
  -1  -3   0  278.52   10.78 
   1  -3   0  280.58   10.83 
  -1  -3   0  297.92   10.83 
  -1   3   0  282.96   10.89 
  -1   3   0  271.45   10.72 
   1   3   0  240.56   10.79 
  -1   3   0  281.99   10.82 
  -1   3   0  261.44   10.81 
   1   3   0  234.43   10.79 
   1   3   0  246.54   10.87 
   1   3   0  282.70   10.85 
  -1   3   0  276.62   10.88 
  -1   3   0  277.77   10.78 
   1   3   0  270.19   10.76 
  -1   3   0  289.57   10.83 
   1   3   0  272.90   10.77 
   2  -3   0  305.14   12.53 
  -2  -3   0  297.27   12.43 
   2  -3   0  316.28   12.52 
   2  -3   0  316.53   12.66 
   2  -3   0  337.25   12.70 
  -2  -3   0  343.29   12.74 
  -2  -3   0  312.62   12.55 
  -2  -3   0  322.69   12.55 
  -2  -3   0  298.39   12.44 
   2  -3   0  311.65   12.50 
   2  -3   0  313.75   12.56 
  -2  -3   0  310.66   12.55 
  -2  -3   0  332.20   12.53 
   2   3   0  328.95   12.72 
  -2   3   0  323.20   12.58 
   2   3   0  313.46   12.55 
   2   3   0  316.82   12.56 
  -2   3   0  310.58   12.50 
  -2   3   0  316.99   12.50 
  -2   3   0  313.90   12.52 
  -2   3   0  301.00   12.49 
  -2   3   0  312.68   12.51 
   2   3   0  313.25   12.52 
   2   3   0  313.24   12.54 
  -2   3   0  302.92   12.64 
   2   3   0  303.29   12.44 
   3  -3   0  149.60    6.15 
   3  -3   0  132.57    5.91 
  -3  -3   0  143.99    6.11 
   3  -3   0  135.74    5.83 
   3  -3   0  131.73    5.79 
   3  -3   0  135.52    6.04 
  -3  -3   0  138.69    5.87 
   3  -3   0  125.15    5.84 
   3   3   0  154.97    5.95 
  -3   3   0  140.59    5.87 
   3   3   0  133.24    5.88 
   3   3   0  141.87    6.14 
  -3   3   0  140.17    5.86 
   3   3   0  143.54    5.73 
  -3   3   0  136.63    5.92 
   3   3   0  136.06    5.90 
   4  -3   0    7.16    1.37 
   4  -3   0    7.38    1.44 
   4  -3   0    8.44    1.24 
   4  -3   0    6.37    1.15 
  -4  -3   0    9.37    1.24 
   4  -3   0    6.85    1.16 
  -4  -3   0    8.94    1.51 
   4   3   0   10.39    1.64 
   4   3   0    6.72    1.03 
  -4   3   0    6.84    0.95 
  -4   3   0    6.67    1.19 
   4   3   0    7.71    1.22 
  -4   3   0    6.74    1.23 
   4   3   0    5.10    1.17 
   4   3   0    8.87    1.34 
  -4   3   0    8.28    1.18 
   5  -3   0  217.42    9.43 
  -5  -3   0  219.84    9.13 
  -5  -3   0  205.12    9.04 
   5  -3   0  213.53    9.15 
   5  -3   0  212.56    8.92 
   5  -3   0  208.01    9.04 
   5  -3   0  215.98    8.91 
   5  -3   0  210.49    9.29 
  -5  -3   0  215.19    9.43 
   5   3   0  212.74    9.46 
  -5   3   0  209.31    9.15 
   5   3   0  220.11    9.11 
   5   3   0  214.35    8.97 
  -5   3   0  222.93    9.09 
  -5   3   0  218.30    9.17 
   5   3   0  231.84    9.34 
   5   3   0  209.90    9.11 
  -6  -3   0   93.68    4.64 
   6  -3   0   87.03    4.86 
   6  -3   0   95.57    4.66 
   6  -3   0   90.88    4.42 
   6  -3   0   88.89    4.96 
   6  -3   0   95.12    4.69 
  -6  -3   0   96.91    4.96 
  -6  -3   0   92.60    4.54 
   6  -3   0   93.97    4.43 
  -6   3   0   91.46    4.36 
  -6   3   0   88.05    4.56 
  -6   3   0   86.92    4.63 
   6   3   0   91.69    4.87 
   6   3   0   88.66    5.06 
  -6   3   0   91.40    4.68 
   6   3   0   90.65    4.45 
   6   3   0   90.35    4.62 
   6   3   0   92.92    4.62 
   7  -3   0   33.36    3.29 
  -7  -3   0   35.18    3.25 
  -7  -3   0   29.36    2.32 
  -7  -3   0   22.42    2.48 
   7  -3   0   30.29    2.71 
   7  -3   0   32.06    2.66 
   7  -3   0   30.98    3.00 
   7  -3   0   28.89    2.59 
  -7  -3   0   30.92    2.61 
  -7   3   0   25.20    2.47 
   7   3   0   33.04    2.61 
   7   3   0   30.79    3.27 
  -7   3   0   32.07    2.80 
  -7   3   0   30.79    2.78 
   7   3   0   28.07    2.67 
   7   3   0   34.07    2.84 
  -7   3   0   29.79    2.48 
   8  -3   0   12.01    2.34 
  -8  -3   0   11.72    2.14 
  -8  -3   0   12.66    2.57 
  -8  -3   0   10.03    1.69 
   8  -3   0   12.61    2.18 
   8  -3   0   11.14    2.82 
   8  -3   0   12.07    1.94 
   8  -3   0   12.96    2.36 
  -8  -3   0    8.99    2.03 
  -8   3   0   10.43    1.98 
   8   3   0   10.39    2.04 
  -8   3   0    8.88    1.75 
  -8   3   0    6.74    2.18 
   8   3   0   13.21    2.28 
   8   3   0   14.11    2.60 
  -8   3   0    7.64    2.07 
  -8   3   0    7.71    2.11 
   8   3   0   11.02    2.28 
   9  -3   0   41.28    4.14 
  -9  -3   0   42.64    3.71 
   9  -3   0   50.85    4.85 
   9  -3   0   46.87    4.07 
  -9  -3   0   53.48    4.58 
  -9  -3   0   42.86    3.97 
   9   3   0   45.63    3.86 
   9   3   0   47.18    4.52 
  -9   3   0   49.37    4.22 
   9   3   0   39.86    3.85 
  -9   3   0   48.82    3.90 
   9   3   0   47.93    4.04 
  -9   3   0   45.24    4.09 
 -10  -3   0   48.23    4.41 
 -10  -3   0   48.67    4.50 
 -10  -3   0   51.43    4.98 
  10  -3   0   56.24    5.10 
  10  -3   0   57.40    5.62 
  10  -3   0   50.60    4.45 
 -10   3   0   49.48    4.73 
  10   3   0   52.23    5.84 
  10   3   0   50.28    4.83 
 -10   3   0   48.84    4.61 
 -10   3   0   44.37    4.24 
  10   3   0   56.55    4.87 
  11  -3   0    8.35    3.74 
 -11  -3   0    5.07    3.37 
  11  -3   0    8.22    3.88 
 -11  -3   0   14.66    3.42 
 -11  -3   0   11.12    3.58 
 -11   3   0   14.10    3.27 
 -11   3   0    9.91    3.19 
  11   3   0   12.21    3.36 
 -11   3   0   10.73    4.01 
  11   3   0   15.22    3.14 
 -11   3   0    7.22    3.19 
  11   3   0   10.23    3.94 
 -12  -3   0    5.71    4.49 
 -12  -3   0    5.82    3.80 
  12  -3   0    5.49    4.42 
  12  -3   0   11.53    3.93 
 -12  -3   0    5.41    3.45 
  12   3   0   11.94    4.52 
  12   3   0    6.24    4.17 
 -12   3   0   11.11    4.44 
  12   3   0   13.27    5.21 
 -12   3   0    6.77    3.49 
   0  -4   0  980.57   37.03 
   0  -4   0  887.38   36.96 
   0  -4   0  936.07   36.99 
   0  -4   0  925.23   37.02 
   0   4   0 1000.00   37.03 
   0   4   0  927.97   36.98 
   0   4   0  977.43   37.04 
   0   4   0  937.67   37.00 
  -1  -4   0   91.16    3.66 
  -1  -4   0   89.56    3.63 
   1  -4   0   88.70    3.65 
   1  -4   0   82.24    3.66 
   1  -4   0   84.02    3.70 
   1  -4   0   85.36    3.76 
  -1  -4   0   93.62    3.76 
  -1  -4   0   86.43    3.69 
  -1  -4   0   90.77    3.75 
   1  -4   0   84.90    3.58 
   1   4   0   88.48    3.66 
   1   4   0   89.00    3.75 
  -1   4   0   87.45    3.76 
  -1   4   0   85.23    3.58 
  -1   4   0   79.12    3.66 
  -1   4   0   88.20    3.65 
   1   4   0   85.27    3.55 
   1   4   0   88.74    3.65 
  -1   4   0   86.45    3.72 
  -1   4   0   82.25    3.67 
   1   4   0   86.10    3.63 
   1   4   0   88.68    3.70 
  -2  -4   0   54.69    2.48 
   2  -4   0   54.34    2.73 
   2  -4   0   53.41    2.62 
  -2  -4   0   51.14    2.47 
   2  -4   0   56.82    2.63 
  -2  -4   0   54.99    2.63 
   2  -4   0   51.57    2.48 
  -2  -4   0   59.58    2.84 
   2  -4   0   54.42    2.86 
   2  -4   0   54.24    2.52 
  -2   4   0   51.50    2.60 
   2   4   0   55.63    2.61 
  -2   4   0   53.89    2.47 
  -2   4   0   52.89    2.50 
   2   4   0   51.69    2.58 
   2   4   0   55.22    2.84 
  -2   4   0   51.90    2.43 
  -2   4   0   55.28    2.64 
   2   4   0   56.66    2.53 
   2   4   0   52.28    2.44 
   3  -4   0  201.28    8.51 
   3  -4   0  200.11    8.50 
  -3  -4   0  194.14    8.14 
  -3  -4   0  213.52    8.57 
   3  -4   0  219.41    8.53 
  -3  -4   0  196.27    8.31 
   3  -4   0  195.79    8.33 
   3  -4   0  195.69    8.24 
  -3  -4   0  194.65    8.13 
  -3   4   0  196.86    8.24 
   3   4   0  207.16    8.60 
   3   4   0  203.36    8.32 
  -3   4   0  199.55    8.30 
   3   4   0  200.36    8.31 
   3   4   0  215.53    8.32 
  -3   4   0  187.99    8.22 
  -3   4   0  206.01    8.36 
   4  -4   0  160.32    7.24 
   4  -4   0  170.36    7.17 
   4  -4   0  171.52    7.45 
   4  -4   0  161.67    7.09 
  -4  -4   0  162.76    7.20 
  -4  -4   0  177.08    7.54 
   4  -4   0  167.80    7.43 
  -4   4   0  159.68    7.17 
  -4   4   0  177.21    7.18 
  -4   4   0  174.36    7.30 
   4   4   0  174.12    7.25 
   4   4   0  181.89    7.59 
   4   4   0  167.62    7.01 
   4   4   0  173.34    7.25 
   4   4   0  168.16    7.25 
   5  -4   0   82.91    4.31 
   5  -4   0   85.09    4.45 
  -5  -4   0   74.51    4.24 
  -5  -4   0   79.90    3.97 
   5  -4   0   75.72    3.82 
   5  -4   0   80.67    4.00 
   5  -4   0   83.99    4.09 
  -5   4   0   82.58    4.01 
   5   4   0   76.85    4.01 
   5   4   0   80.30    3.76 
  -5   4   0   78.46    3.93 
   5   4   0   76.63    4.10 
  -5   4   0   81.28    4.08 
   5   4   0   78.27    4.01 
   5   4   0   78.81    4.43 
  -6  -4   0   19.66    2.01 
   6  -4   0   22.12    2.36 
   6  -4   0   19.07    2.30 
  -6  -4   0   23.83    2.14 
   6  -4   0   17.67    1.93 
   6  -4   0   22.68    1.96 
  -6  -4   0   21.40    2.43 
   6  -4   0   21.94    2.12 
   6   4   0   20.21    1.84 
  -6   4   0   18.14    2.05 
  -6   4   0   22.01    2.00 
   6   4   0   19.67    1.98 
   6   4   0   25.89    2.68 
  -6   4   0   18.25    2.00 
   6   4   0   22.08    2.32 
   6   4   0   17.19    1.98 
   7  -4   0  102.19    5.69 
  -7  -4   0  103.93    5.66 
   7  -4   0  105.60    5.22 
   7  -4   0  107.45    5.01 
  -7  -4   0   95.53    5.15 
  -7  -4   0   91.70    5.13 
   7  -4   0   94.27    5.49 
   7  -4   0   99.04    5.19 
  -7   4   0   92.69    5.20 
  -7   4   0   95.70    5.08 
   7   4   0   95.46    5.22 
   7   4   0   94.68    5.63 
   7   4   0   96.42    5.26 
  -7   4   0  105.16    5.29 
   7   4   0  101.34    5.08 
   7   4   0  113.62    5.76 
   8  -4   0   88.86    5.98 
   8  -4   0   99.58    5.30 
  -8  -4   0   89.21    5.34 
  -8  -4   0   94.26    5.97 
   8  -4   0   91.14    5.59 
  -8  -4   0   80.45    5.09 
   8  -4   0   92.83    5.37 
   8   4   0   85.88    5.44 
   8   4   0   90.97    5.07 
  -8   4   0   92.71    5.43 
  -8   4   0   98.31    5.46 
   8   4   0   93.43    5.31 
  -8   4   0   94.73    5.24 
   8   4   0   96.93    6.05 
  -8   4   0   97.69    4.86 
   9  -4   0   18.28    3.53 
   9  -4   0   21.95    3.31 
  -9  -4   0   10.96    2.64 
   9  -4   0   17.57    2.73 
  -9  -4   0   15.85    2.66 
  -9  -4   0   15.80    3.15 
  -9   4   0   21.59    2.96 
  -9   4   0   19.09    2.77 
   9   4   0   15.89    3.38 
   9   4   0   15.79    2.89 
   9   4   0   20.96    2.95 
  -9   4   0   22.13    2.78 
 -10  -4   0   15.99    3.25 
 -10  -4   0   16.35    2.89 
 -10  -4   0   16.27    3.55 
  10  -4   0    9.98    2.89 
  10  -4   0   21.38    3.75 
  10  -4   0   19.87    3.81 
 -10   4   0   17.44    3.03 
  10   4   0   13.14    3.53 
 -10   4   0   18.63    3.09 
 -10   4   0   18.15    3.25 
  10   4   0   18.03    3.32 
  10   4   0   17.27    3.46 
  11  -4   0   62.86    5.28 
 -11  -4   0   50.82    5.48 
 -11  -4   0   57.90    5.27 
 -11  -4   0   51.20    5.48 
  11  -4   0   43.63    6.08 
 -11   4   0   51.86    5.05 
 -11   4   0   51.61    5.87 
  11   4   0   62.57    5.68 
  11   4   0   62.21    6.23 
 -11   4   0   48.52    6.13 
  11   4   0   57.80    5.29 
 -11   4   0   60.55    5.51 
  12  -4   0   34.66    6.24 
  12  -4   0   35.55    5.64 
 -12  -4   0   39.75    5.07 
 -12  -4   0   30.93    4.91 
 -12  -4   0   32.72    4.99 
  12   4   0   38.23    5.01 
 -12   4   0   31.96    6.04 
 -12   4   0   34.23    5.05 
  12   4   0   39.68    5.41 
 -12   4   0   30.34    4.78 
   0  -5   0    0.71    0.63 
   0  -5   0    1.48    0.62 
   0  -5   0    1.12    0.79 
   0  -5   0   -0.07    0.45 
   0  -5   0    0.71    0.58 
   0  -5   0   -0.47    0.59 
   0  -5   0   -0.28    0.52 
   0   5   0    0.43    0.44 
   0   5   0    1.62    0.57 
   0   5   0    0.37    0.64 
   0   5   0    0.72    0.52 
   0   5   0    0.00    0.56 
   0   5   0    0.32    0.49 
   0   5   0   -0.12    0.57 
   0   5   0    1.26    0.85 
  -1  -5   0   15.07    1.31 
   1  -5   0   14.52    1.24 
   1  -5   0   13.92    1.23 
  -1  -5   0   13.85    1.17 
  -1  -5   0   17.47    1.32 
  -1  -5   0   16.36    1.24 
  -1  -5   0   16.15    1.01 
   1  -5   0   16.68    1.28 
   1  -5   0   16.31    1.20 
  -1  -5   0   17.89    1.31 
   1   5   0   15.17    1.25 
   1   5   0   17.26    1.24 
   1   5   0   16.91    1.34 
  -1   5   0   12.73    1.18 
   1   5   0   16.08    1.37 
  -1   5   0   14.19    1.17 
  -1   5   0   16.51    1.23 
   1   5   0   17.15    1.28 
  -1   5   0   19.17    1.16 
  -1   5   0   16.26    1.24 
  -1   5   0   16.64    1.43 
  -2  -5   0   57.47    2.82 
   2  -5   0   58.57    2.86 
   2  -5   0   58.75    2.76 
   2  -5   0   51.71    2.52 
   2  -5   0   53.81    2.76 
  -2  -5   0   60.92    2.98 
  -2  -5   0   55.05    2.59 
   2  -5   0   54.22    2.98 
   2  -5   0   56.99    2.60 
  -2  -5   0   57.15    2.58 
  -2   5   0   58.29    2.64 
   2   5   0   58.81    2.73 
   2   5   0   59.65    2.98 
  -2   5   0   53.10    2.48 
   2   5   0   59.69    2.74 
   2   5   0   57.80    2.58 
  -2   5   0   54.70    2.73 
  -2   5   0   58.55    2.74 
   2   5   0   52.45    2.55 
  -2   5   0   52.10    2.49 
   3  -5   0   29.36    1.92 
   3  -5   0   30.41    2.17 
   3  -5   0   32.30    2.41 
  -3  -5   0   27.97    2.24 
  -3  -5   0   26.15    1.75 
   3  -5   0   32.94    2.08 
  -3  -5   0   33.17    2.05 
   3  -5   0   31.25    2.02 
  -3   5   0   27.98    2.03 
  -3   5   0   26.02    1.75 
   3   5   0   27.43    2.01 
   3   5   0   29.82    2.03 
  -3   5   0   29.62    1.83 
   3   5   0   27.54    1.73 
  -3   5   0   30.52    1.88 
   3   5   0   30.01    1.87 
   3   5   0   33.24    2.38 
  -4  -5   0    5.02    1.41 
  -4  -5   0    5.88    1.21 
   4  -5   0    6.87    1.52 
   4  -5   0    5.41    1.17 
   4  -5   0    7.16    1.26 
   4  -5   0    5.45    1.40 
   4   5   0    5.72    1.23 
  -4   5   0    7.81    1.14 
   4   5   0    6.07    1.57 
  -4   5   0    5.96    1.09 
   4   5   0    4.68    1.19 
   4   5   0    5.73    1.21 
  -4   5   0    6.66    1.21 
   5  -5   0   26.37    2.09 
  -5  -5   0   24.99    2.42 
   5  -5   0   20.76    1.97 
   5  -5   0   21.26    2.23 
   5  -5   0   23.33    2.30 
  -5  -5   0   27.05    2.08 
   5   5   0   25.58    2.17 
   5   5   0   21.28    1.95 
  -5   5   0   21.55    1.92 
  -5   5   0   21.10    2.00 
   5   5   0   25.11    1.78 
   5   5   0   27.88    2.52 
   5   5   0   24.14    2.00 
  -5   5   0   27.23    2.07 
   6  -5   0   22.64    2.14 
  -6  -5   0   20.02    2.08 
   6  -5   0   26.52    2.10 
  -6  -5   0   22.39    2.21 
   6  -5   0   26.28    2.59 
   6  -5   0   20.86    2.48 
  -6  -5   0   27.11    2.68 
   6   5   0   21.40    2.13 
  -6   5   0   19.14    1.97 
   6   5   0   22.74    2.64 
   6   5   0   23.26    2.18 
  -6   5   0   18.52    2.02 
  -6   5   0   26.61    2.22 
   6   5   0   23.24    1.92 
   6   5   0   21.93    2.35 
   7  -5   0    0.80    1.87 
  -7  -5   0    3.16    1.90 
   7  -5   0    4.96    1.95 
  -7  -5   0    2.38    1.60 
   7  -5   0    3.37    1.57 
  -7  -5   0    0.80    1.54 
   7  -5   0    2.79    1.61 
   7   5   0    3.07    1.80 
   7   5   0    2.57    1.37 
   7   5   0    3.27    2.04 
   7   5   0    2.40    1.67 
  -7   5   0    3.27    1.62 
  -7   5   0    1.99    1.58 
  -7   5   0    0.23    1.44 
   7   5   0    0.88    1.47 
  -8  -5   0   38.93    3.82 
  -8  -5   0   36.04    3.17 
  -8  -5   0   26.67    3.03 
   8  -5   0   25.86    3.48 
  -8  -5   0   33.54    2.93 
   8  -5   0   32.76    2.82 
   8  -5   0   30.47    3.14 
   8  -5   0   26.74    3.43 
  -8   5   0   31.76    3.25 
   8   5   0   33.63    3.05 
  -8   5   0   31.79    2.94 
  -8   5   0   34.39    3.27 
   8   5   0   33.13    2.87 
   8   5   0   38.14    3.59 
   8   5   0   30.94    3.05 
   9  -5   0    9.69    2.42 
  -9  -5   0    7.97    2.85 
   9  -5   0    7.84    2.91 
  -9  -5   0    7.09    2.36 
  -9  -5   0    5.61    2.42 
   9  -5   0    7.89    2.75 
   9   5   0    3.95    2.49 
  -9   5   0    5.03    2.21 
  -9   5   0    5.06    2.31 
   9   5   0    9.75    2.41 
   9   5   0    5.11    2.71 
  -9   5   0   15.90    2.62 
  10  -5   0   22.04    3.74 
 -10  -5   0   25.67    4.28 
  10  -5   0   24.09    3.43 
  10  -5   0   16.66    4.21 
 -10  -5   0   22.18    3.18 
 -10  -5   0   19.03    3.02 
  10   5   0   20.39    3.34 
  10   5   0   20.47    3.49 
 -10   5   0   16.84    3.06 
 -10   5   0   22.33    3.40 
  10   5   0   25.84    4.29 
 -10   5   0   21.43    3.25 
 -11  -5   0    4.96    3.07 
  11  -5   0    6.31    3.21 
  11  -5   0    7.80    3.86 
  11  -5   0    3.33    3.73 
 -11  -5   0    2.79    2.75 
 -11  -5   0    7.13    3.27 
  11   5   0    8.61    3.02 
  11   5   0    2.03    3.57 
 -11   5   0    3.56    2.99 
  11   5   0    7.22    3.61 
 -11   5   0    0.83    2.98 
 -11   5   0    6.00    3.85 
  12  -5   0    8.18    4.04 
  12  -5   0    5.88    4.76 
 -12  -5   0    7.87    3.66 
 -12  -5   0    3.61    4.06 
 -12  -5   0    4.02    3.57 
 -12   5   0    0.66    4.10 
 -12   5   0    6.45    4.03 
  12   5   0    7.48    3.58 
  12   5   0    5.59    3.87 
 -12   5   0    4.24    3.58 
   0  -6   0   99.18    4.38 
   0  -6   0  103.74    4.42 
   0  -6   0  101.95    4.43 
   0  -6   0  106.20    4.38 
   0  -6   0   99.33    4.30 
   0  -6   0  106.14    4.54 
   0  -6   0  107.33    4.38 
   0   6   0  112.38    4.41 
   0   6   0  104.92    4.38 
   0   6   0  110.87    4.40 
   0   6   0  105.60    4.54 
   0   6   0   95.16    4.29 
   0   6   0  101.15    4.35 
   0   6   0  105.08    4.43 
   1  -6   0   74.17    3.57 
  -1  -6   0   80.56    3.52 
   1  -6   0   76.47    3.47 
  -1  -6   0   81.72    3.58 
  -1  -6   0   83.92    3.35 
   1  -6   0   75.48    3.50 
  -1  -6   0   83.98    3.56 
  -1  -6   0   76.30    3.46 
   1  -6   0   77.92    3.66 
  -1  -6   0   83.42    3.60 
  -1  -6   0   77.21    3.56 
  -1   6   0   73.86    3.50 
  -1   6   0   80.82    3.41 
  -1   6   0   79.46    3.61 
   1   6   0   81.80    3.49 
   1   6   0   83.97    3.53 
   1   6   0   79.94    3.56 
   1   6   0   75.56    3.49 
  -1   6   0   71.72    3.50 
   1   6   0   80.51    3.33 
  -1   6   0   79.48    3.59 
   1   6   0   79.06    3.58 
  -1   6   0   79.77    3.51 
  -2  -6   0   -0.78    0.67 
  -2  -6   0    2.15    1.08 
  -2  -6   0    0.21    0.99 
  -2  -6   0    2.40    0.85 
   2  -6   0   -0.92    1.00 
   2  -6   0   -0.10    1.13 
   2  -6   0    1.14    1.01 
   2  -6   0    0.39    0.62 
   2   6   0    0.94    0.90 
   2   6   0    0.14    0.70 
  -2   6   0    0.01    0.57 
   2   6   0    1.75    0.85 
  -2   6   0    2.88    0.80 
   2   6   0    2.34    1.12 
  -2   6   0    1.89    0.87 
  -2   6   0    0.86    0.55 
   2   6   0    1.77    0.89 
  -3  -6   0  110.80    4.80 
  -3  -6   0  110.56    5.05 
   3  -6   0  113.56    4.99 
   3  -6   0  114.80    5.31 
   3  -6   0  114.75    5.02 
   3  -6   0  116.61    5.22 
   3  -6   0  108.54    4.87 
  -3  -6   0  116.71    5.28 
   3   6   0  109.76    4.99 
  -3   6   0  105.98    4.78 
   3   6   0  122.07    5.34 
  -3   6   0  115.60    4.89 
   3   6   0  112.20    4.98 
   3   6   0  113.72    4.89 
  -3   6   0  118.29    5.03 
  -3   6   0  111.01    4.85 
   4  -6   0   40.22    2.52 
  -4  -6   0   40.90    2.86 
  -4  -6   0   45.26    2.62 
   4  -6   0   43.20    2.98 
  -4  -6   0   37.42    2.23 
   4  -6   0   37.88    2.58 
   4  -6   0   45.27    3.01 
  -4   6   0   42.26    2.43 
  -4   6   0   41.33    2.32 
   4   6   0   41.81    2.45 
   4   6   0   44.37    2.97 
  -4   6   0   43.37    2.61 
   4   6   0   40.80    2.55 
   5  -6   0    2.57    1.28 
   5  -6   0    0.90    1.35 
   5  -6   0    0.36    1.14 
  -5  -6   0    2.53    1.42 
   5  -6   0    0.43    1.45 
  -5  -6   0    2.46    1.25 
   5   6   0    0.22    1.13 
   5   6   0    4.00    1.58 
   5   6   0    0.73    1.16 
  -5   6   0    0.65    1.09 
  -5   6   0    0.86    1.12 
  -5   6   0   -0.89    1.01 
   5   6   0    0.91    1.20 
   6  -6   0   27.92    2.40 
   6  -6   0   25.60    2.63 
   6  -6   0   24.39    2.74 
  -6  -6   0   25.90    2.03 
   6  -6   0   28.83    2.51 
  -6  -6   0   28.62    2.46 
  -6  -6   0   34.27    3.03 
  -6   6   0   27.19    2.30 
   6   6   0   22.87    2.23 
  -6   6   0   26.06    2.20 
  -6   6   0   25.50    2.30 
   6   6   0   28.11    2.56 
   6   6   0   29.51    2.96 
   6   6   0   24.96    2.30 
   7  -6   0   33.88    2.92 
   7  -6   0   27.34    3.07 
  -7  -6   0   29.22    2.49 
  -7  -6   0   28.15    2.67 
  -7  -6   0   35.58    3.26 
  -7  -6   0   29.50    2.70 
   7  -6   0   28.35    3.05 
   7  -6   0   32.44    2.76 
   7   6   0   27.60    2.61 
  -7   6   0   26.24    2.47 
  -7   6   0   27.49    2.72 
   7   6   0   25.96    2.91 
  -7   6   0   34.49    2.86 
   7   6   0   31.06    2.81 
   7   6   0   28.96    3.20 
   8  -6   0   17.77    2.56 
   8  -6   0   16.11    2.93 
  -8  -6   0   20.43    2.67 
   8  -6   0   20.70    2.59 
  -8  -6   0   18.50    2.31 
  -8  -6   0   20.81    3.24 
   8  -6   0   17.76    2.98 
  -8  -6   0   17.18    2.42 
   8   6   0   17.15    2.45 
   8   6   0   21.16    2.97 
  -8   6   0   16.88    2.50 
   8   6   0   15.57    2.68 
   8   6   0   21.14    2.31 
  -8   6   0   12.85    2.37 
  -8   6   0   18.08    2.38 
   9  -6   0   -1.38    2.46 
  -9  -6   0    4.85    2.38 
  -9  -6   0    5.14    2.72 
   9  -6   0    4.22    2.28 
   9  -6   0    7.30    3.06 
  -9  -6   0    5.62    2.32 
   9   6   0    8.92    2.42 
  -9   6   0    4.82    2.82 
  -9   6   0    3.09    2.22 
   9   6   0    7.13    2.71 
   9   6   0    8.25    2.76 
  -9   6   0    2.29    2.20 
 -10  -6   0   -1.34    2.37 
 -10  -6   0    2.69    2.46 
  10  -6   0    3.98    3.27 
  10  -6   0   -1.81    2.38 
  10  -6   0    5.08    3.11 
 -10  -6   0    5.80    3.01 
 -10   6   0    0.20    2.32 
  10   6   0   -1.63    2.57 
  10   6   0    2.37    2.58 
  10   6   0    5.62    3.38 
 -10   6   0   -0.81    2.37 
 -10   6   0    1.12    2.64 
 -10   6   0    3.14    3.23 
  11  -6   0   15.27    4.59 
  11  -6   0   17.74    3.77 
 -11  -6   0   10.45    3.56 
 -11  -6   0    9.34    3.35 
  11  -6   0   12.42    3.96 
  11   6   0   10.19    3.19 
  11   6   0   10.79    3.62 
 -11   6   0   10.80    3.36 
 -11   6   0   13.06    4.37 
 -11   6   0   23.03    3.87 
  11   6   0   18.96    4.40 
 -12  -6   0   29.17    4.50 
  12  -6   0   24.05    4.21 
 -12  -6   0   22.63    4.50 
  12  -6   0   15.66    4.90 
  12   6   0   33.48    4.78 
 -12   6   0   19.85    4.93 
 -12   6   0   17.41    3.92 
 -12   6   0   17.20    4.27 
   0  -7   0    0.82    0.79 
   0  -7   0    1.23    0.96 
   0  -7   0   -0.03    1.18 
   0  -7   0   -0.49    0.87 
   0  -7   0    1.35    0.70 
   0  -7   0    0.43    0.79 
   0  -7   0   -0.59    0.59 
   0   7   0   -0.61    1.10 
   0   7   0    1.51    0.72 
   0   7   0    1.45    0.75 
   0   7   0    1.04    0.66 
   0   7   0    0.15    0.85 
   0   7   0    0.61    0.82 
   0   7   0   -0.02    0.76 
   0   7   0   -0.71    0.78 
  -1  -7   0  205.42    7.87 
   1  -7   0  192.84    7.90 
  -1  -7   0  193.14    8.06 
   1  -7   0  184.38    8.03 
  -1  -7   0  195.65    8.08 
   1  -7   0  195.62    8.14 
   1  -7   0  192.31    7.88 
   1  -7   0  183.78    8.04 
   1  -7   0  190.96    8.07 
  -1  -7   0  200.89    8.06 
  -1  -7   0  200.69    8.06 
  -1   7   0  200.42    7.93 
   1   7   0  199.22    8.03 
   1   7   0  190.66    8.07 
   1   7   0  207.65    8.03 
   1   7   0  203.40    7.87 
   1   7   0  199.91    8.04 
  -1   7   0  182.11    8.02 
  -1   7   0  197.29    8.06 
  -1   7   0  201.03    8.04 
   2  -7   0  463.28   17.94 
  -2  -7   0  450.13   17.83 
  -2  -7   0  438.91   17.61 
   2  -7   0  453.84   17.97 
   2  -7   0  440.00   17.78 
  -2  -7   0  468.72   17.97 
  -2  -7   0  438.38   17.68 
   2  -7   0  425.64   17.53 
  -2   7   0  450.45   17.67 
   2   7   0  473.31   18.00 
   2   7   0  423.40   17.62 
  -2   7   0  411.43   17.49 
   2   7   0  471.40   17.82 
   2   7   0  450.85   17.77 
  -2   7   0  439.96   17.87 
  -2   7   0  425.49   17.52 
   2   7   0  460.53   17.78 
  -2   7   0  452.76   17.79 
   3  -7   0    5.90    1.29 
   3  -7   0    5.57    1.17 
   3  -7   0    6.50    1.32 
  -3  -7   0    5.90    1.04 
   3  -7   0    6.50    1.00 
  -3  -7   0    8.46    1.48 
   3  -7   0    6.14    1.54 
  -3  -7   0    6.38    1.31 
   3   7   0    3.42    1.09 
   3   7   0    5.78    1.16 
   3   7   0    4.49    0.98 
   3   7   0    7.73    1.49 
  -3   7   0    7.70    1.16 
  -3   7   0    6.25    0.94 
  -3   7   0    6.13    0.89 
  -3   7   0    7.21    1.04 
   4  -7   0   37.59    2.43 
   4  -7   0   38.79    2.76 
  -4  -7   0   35.22    2.49 
   4  -7   0   33.58    2.38 
  -4  -7   0   35.54    2.09 
  -4  -7   0   36.42    2.69 
   4  -7   0   34.79    2.89 
   4   7   0   33.93    2.40 
  -4   7   0   34.08    2.38 
  -4   7   0   32.97    2.08 
  -4   7   0   37.37    2.25 
   4   7   0   37.25    2.23 
   4   7   0   37.57    2.85 
   4   7   0   32.22    2.37 
   5  -7   0  144.16    7.02 
  -5  -7   0  150.09    6.74 
  -5  -7   0  149.06    7.06 
   5  -7   0  146.88    6.59 
   5  -7   0  147.61    6.70 
   5  -7   0  147.77    7.05 
   5   7   0  159.52    6.70 
  -5   7   0  156.13    6.59 
  -5   7   0  146.20    6.52 
   5   7   0  152.03    7.14 
   5   7   0  149.13    6.68 
   5   7   0  149.19    6.72 
  -5   7   0  147.51    6.72 
   6  -7   0  127.81    6.04 
  -6  -7   0  138.68    6.67 
   6  -7   0  129.90    6.18 
   6  -7   0  117.22    6.57 
   6  -7   0  126.64    6.59 
  -6  -7   0  128.49    6.22 
   6   7   0  135.28    6.72 
  -6   7   0  125.85    6.17 
   6   7   0  128.75    6.15 
   6   7   0  134.97    6.33 
  -6   7   0  138.41    6.11 
  -6   7   0  133.31    6.10 
   6   7   0  131.09    6.15 
  -7  -7   0   53.70    3.56 
   7  -7   0   46.44    3.36 
  -7  -7   0   49.49    3.50 
   7  -7   0   54.24    4.23 
   7  -7   0   47.13    4.07 
  -7  -7   0   46.62    3.98 
   7  -7   0   48.78    3.50 
  -7   7   0   52.46    3.42 
   7   7   0   53.19    4.20 
   7   7   0   48.82    3.63 
  -7   7   0   49.96    3.48 
  -7   7   0   47.15    3.36 
   7   7   0   47.84    3.74 
   7   7   0   51.47    3.58 
  -8  -7   0   30.92    2.93 
   8  -7   0   22.13    3.22 
   8  -7   0   20.08    2.76 
   8  -7   0   27.97    2.87 
  -8  -7   0   28.88    3.02 
   8  -7   0   26.50    3.32 
  -8  -7   0   31.64    3.63 
   8   7   0   26.87    3.01 
  -8   7   0   29.55    2.96 
  -8   7   0   20.75    2.76 
  -8   7   0   25.78    2.67 
   8   7   0   22.04    2.73 
   8   7   0   23.82    3.24 
  -9  -7   0   82.07    5.81 
   9  -7   0   97.25    6.35 
   9  -7   0   94.57    6.37 
   9  -7   0  101.69    5.68 
  -9  -7   0   88.57    6.30 
  -9  -7   0   82.85    5.37 
  -9   7   0   96.35    5.74 
  -9   7   0   90.84    6.45 
   9   7   0   89.46    6.41 
   9   7   0   92.27    5.81 
   9   7   0   88.62    5.66 
  -9   7   0   90.53    5.76 
 -10  -7   0   37.07    3.94 
  10  -7   0   36.48    5.21 
  10  -7   0   43.81    4.27 
 -10  -7   0   41.02    4.96 
 -10  -7   0   36.88    4.15 
  10  -7   0   40.46    4.55 
  10   7   0   47.73    4.63 
  10   7   0   43.07    5.17 
 -10   7   0   37.43    3.81 
 -10   7   0   40.97    5.13 
 -10   7   0   37.20    4.01 
  10   7   0   42.99    4.46 
  11  -7   0    5.48    3.19 
 -11  -7   0    2.29    2.94 
  11  -7   0   -1.48    3.69 
 -11  -7   0   -1.29    2.90 
  11  -7   0    7.74    4.20 
 -11   7   0    4.98    2.95 
 -11   7   0    5.69    2.84 
  11   7   0   -0.48    3.05 
  11   7   0    7.26    3.40 
 -11   7   0    0.30    3.64 
  12  -7   0   18.88    5.10 
 -12  -7   0   19.09    4.65 
 -12  -7   0   17.66    4.68 
  12  -7   0   20.47    4.21 
 -12   7   0   20.47    5.77 
 -12   7   0   24.38    4.30 
  12   7   0   16.18    3.99 
   0  -8   0  127.93    5.50 
   0  -8   0  128.34    5.53 
   0  -8   0  125.49    5.41 
   0  -8   0  136.15    5.58 
   0  -8   0  131.25    5.51 
   0  -8   0  127.69    5.72 
   0   8   0  122.19    5.41 
   0   8   0  136.75    5.54 
   0   8   0  134.61    5.61 
   0   8   0  133.92    5.54 
   0   8   0  137.72    5.53 
   0   8   0  130.26    5.53 
   1  -8   0  186.68    7.81 
  -1  -8   0  198.62    7.80 
  -1  -8   0  181.74    8.13 
  -1  -8   0  196.10    8.02 
   1  -8   0  193.62    8.08 
  -1  -8   0  178.84    7.97 
  -1  -8   0  194.58    8.02 
   1  -8   0  190.04    8.01 
   1  -8   0  184.58    8.02 
   1  -8   0  191.58    7.82 
   1   8   0  199.02    7.81 
  -1   8   0  187.85    7.80 
  -1   8   0  202.36    8.01 
   1   8   0  190.31    7.95 
  -1   8   0  195.47    7.97 
   1   8   0  198.66    8.04 
  -1   8   0  196.56    7.85 
   1   8   0  203.56    7.97 
   2  -8   0    0.56    1.21 
   2  -8   0    1.98    1.08 
  -2  -8   0    2.60    0.77 
  -2  -8   0    4.51    1.24 
   2  -8   0    2.26    1.36 
  -2  -8   0    4.12    1.08 
  -2  -8   0    2.90    1.21 
  -2   8   0    2.85    1.04 
   2   8   0    3.17    0.81 
   2   8   0    2.91    1.03 
   2   8   0    4.28    1.29 
  -2   8   0    4.35    1.05 
  -2   8   0    3.53    0.91 
   2   8   0    2.77    1.02 
  -3  -8   0  182.08    7.71 
  -3  -8   0  198.84    7.95 
   3  -8   0  177.68    7.41 
   3  -8   0  191.79    7.94 
  -3  -8   0  180.46    7.48 
   3  -8   0  183.34    7.93 
   3  -8   0  180.12    7.63 
   3   8   0  179.80    7.63 
  -3   8   0  192.73    7.52 
  -3   8   0  188.02    7.68 
   3   8   0  180.20    7.92 
   3   8   0  155.84    7.41 
  -3   8   0  167.69    7.30 
   3   8   0  186.04    7.63 
  -3   8   0  173.91    7.37 
   4  -8   0  295.38   12.43 
   4  -8   0  295.98   12.04 
   4  -8   0  293.37   12.11 
   4  -8   0  299.94   12.39 
  -4  -8   0  282.97   12.15 
  -4  -8   0  299.90   12.42 
  -4   8   0  295.52   12.12 
   4   8   0  287.59   12.08 
  -4   8   0  278.17   11.83 
   4   8   0  293.02   12.12 
   4   8   0  293.06   12.46 
   4   8   0  301.59   12.01 
  -4   8   0  301.37   11.99 
   5  -8   0   77.96    4.18 
   5  -8   0   77.44    3.90 
   5  -8   0   70.45    3.80 
  -5  -8   0   73.36    4.26 
  -5  -8   0   76.69    3.99 
   5  -8   0   70.33    4.29 
  -5   8   0   74.19    3.73 
  -5   8   0   74.24    3.88 
   5   8   0   73.53    3.86 
   5   8   0   72.13    3.77 
   5   8   0   71.77    4.32 
  -5   8   0   66.35    3.54 
   5   8   0   70.76    3.87 
   6  -8   0   12.73    2.02 
  -6  -8   0   15.18    2.01 
   6  -8   0   11.11    1.77 
   6  -8   0    9.58    1.73 
  -6  -8   0   10.66    2.09 
   6  -8   0   14.23    2.26 
   6   8   0   14.18    2.39 
   6   8   0    9.70    1.68 
   6   8   0   13.10    2.01 
  -6   8   0   12.63    1.83 
  -6   8   0   13.12    1.68 
   6   8   0   12.91    1.88 
  -6   8   0   12.25    1.67 
   7  -8   0   93.33    5.18 
   7  -8   0   96.57    5.70 
  -7  -8   0   98.59    5.73 
  -7  -8   0   94.73    5.35 
   7  -8   0  105.24    5.10 
   7  -8   0  104.31    5.83 
   7   8   0   95.42    5.84 
   7   8   0  100.58    5.24 
   7   8   0  100.89    5.26 
  -7   8   0   87.00    5.15 
  -7   8   0   87.37    4.90 
  -7   8   0   98.72    5.05 
   7   8   0   93.88    5.38 
   8  -8   0   61.02    5.06 
   8  -8   0   60.70    5.09 
  -8  -8   0   69.00    4.54 
  -8  -8   0   58.53    4.54 
   8  -8   0   72.79    4.49 
  -8  -8   0   61.19    5.10 
   8  -8   0   63.18    4.45 
  -8   8   0   65.90    4.28 
  -8   8   0   64.89    4.52 
  -8   8   0   70.86    4.41 
   8   8   0   65.23    4.52 
   8   8   0   69.74    4.88 
   8   8   0   70.35    4.50 
  -9  -8   0   14.25    2.71 
   9  -8   0   13.23    3.25 
  -9  -8   0   11.42    2.72 
  -9  -8   0   12.53    3.23 
   9  -8   0   12.48    2.55 
   9  -8   0    6.38    3.03 
  -9   8   0   10.59    2.43 
  -9   8   0   11.62    2.96 
   9   8   0   16.64    3.35 
  -9   8   0   12.76    2.54 
  -9   8   0   12.63    3.50 
   9   8   0   16.11    2.72 
   9   8   0    8.20    2.63 
 -10  -8   0   13.60    3.36 
  10  -8   0   13.15    3.62 
  10  -8   0   10.76    2.93 
 -10  -8   0    7.52    2.80 
 -10  -8   0    8.20    2.87 
  10  -8   0    8.12    3.82 
  10   8   0    5.76    3.03 
 -10   8   0   11.18    2.81 
  10   8   0    9.06    3.46 
  10   8   0   12.19    3.16 
 -10   8   0    4.41    3.64 
  11  -8   0   52.57    5.19 
 -11  -8   0   45.25    5.27 
  11  -8   0   39.51    5.36 
 -11  -8   0   41.15    4.29 
  11  -8   0   33.47    5.27 
 -11   8   0   41.07    4.59 
 -11   8   0   40.79    4.45 
 -11   8   0   36.72    5.91 
  11   8   0   38.17    5.01 
  11   8   0   48.08    5.12 
 -12  -8   0   32.04    5.46 
  12  -8   0   31.93    6.24 
  12  -8   0   47.74    6.59 
 -12  -8   0   53.90    5.45 
  12   8   0   55.76    5.78 
 -12   8   0   32.96    6.48 
   0  -9   0   -2.73    0.99 
   0  -9   0    0.05    0.72 
   0  -9   0   -0.87    0.78 
   0  -9   0    1.94    1.41 
   0  -9   0    0.38    1.13 
   0   9   0    2.35    1.08 
   0   9   0    1.39    0.83 
   0   9   0    2.12    0.91 
   0   9   0   -0.08    0.85 
   0   9   0    0.89    0.98 
   0   9   0    0.99    0.76 
  -1  -9   0    5.56    0.82 
   1  -9   0    3.86    1.34 
  -1  -9   0    6.37    1.41 
   1  -9   0    5.11    1.03 
  -1  -9   0    4.72    1.12 
  -1  -9   0    6.18    1.29 
   1  -9   0    5.87    1.10 
   1  -9   0    3.41    1.40 
   1   9   0    5.36    0.91 
   1   9   0    6.46    1.18 
  -1   9   0    4.81    1.01 
   1   9   0    4.46    1.09 
  -1   9   0    4.95    1.07 
   1   9   0    5.19    1.10 
  -1   9   0    4.84    0.92 
  -1   9   0    2.86    1.03 
  -2  -9   0   14.66    1.67 
   2  -9   0   16.20    1.65 
  -2  -9   0   17.09    1.72 
   2  -9   0   13.39    1.57 
  -2  -9   0   16.66    1.55 
  -2  -9   0   14.62    1.31 
   2  -9   0   15.93    1.84 
   2   9   0   18.08    1.76 
   2   9   0   12.84    1.18 
  -2   9   0   14.46    1.59 
   2   9   0   15.31    1.47 
  -2   9   0   15.38    1.43 
  -2   9   0   16.40    1.31 
   2   9   0   16.99    1.50 
  -3  -9   0    7.87    1.16 
  -3  -9   0    8.29    1.48 
  -3  -9   0    5.51    1.43 
   3  -9   0    5.68    0.95 
   3  -9   0    6.58    1.41 
   3  -9   0    5.41    1.40 
   3  -9   0    7.14    1.68 
   3   9   0    5.53    1.17 
  -3   9   0    5.51    0.80 
   3   9   0    4.49    1.16 
  -3   9   0    6.15    1.31 
  -3   9   0    6.39    0.87 
   3   9   0    8.09    1.51 
   3   9   0    7.09    1.04 
  -3   9   0    6.21    1.10 
  -3   9   0    6.78    1.19 
  -4  -9   0    1.04    1.06 
   4  -9   0   -0.43    1.26 
  -4  -9   0    0.95    1.32 
   4  -9   0    0.33    1.58 
  -4  -9   0    1.65    1.36 
   4  -9   0    3.11    1.37 
  -4   9   0    0.92    0.83 
   4   9   0    1.69    1.12 
   4   9   0    1.75    1.16 
  -4   9   0   -0.44    1.04 
   4   9   0    0.60    1.40 
   4   9   0    1.45    1.13 
  -4   9   0    0.91    1.01 
  -5  -9   0    8.97    1.85 
   5  -9   0    5.72    1.52 
   5  -9   0    7.44    1.85 
   5  -9   0    6.40    1.77 
  -5  -9   0    6.91    1.25 
   5  -9   0    7.44    1.43 
  -5  -9   0    8.70    1.70 
  -5   9   0    6.50    1.38 
   5   9   0    8.15    1.47 
  -5   9   0    5.01    1.21 
   5   9   0    6.25    1.44 
   5   9   0    9.15    1.93 
   5   9   0    5.00    1.41 
  -5   9   0    7.02    1.35 
  -6  -9   0    8.53    2.01 
  -6  -9   0    4.35    1.73 
   6  -9   0    8.92    1.73 
   6  -9   0    6.67    2.09 
   6  -9   0    7.70    1.99 
   6  -9   0    6.07    1.74 
   6   9   0    6.38    2.06 
  -6   9   0    5.76    1.48 
  -6   9   0    8.70    1.47 
   6   9   0    7.90    1.68 
  -6   9   0    5.68    1.54 
   6   9   0    5.34    1.57 
   6   9   0    6.66    1.80 
   7  -9   0    3.82    2.10 
  -7  -9   0    5.65    2.00 
   7  -9   0    9.29    1.92 
  -7  -9   0    7.63    2.27 
   7  -9   0    5.73    1.87 
   7  -9   0    8.26    2.48 
   7   9   0    8.06    1.94 
  -7   9   0    4.15    1.64 
  -7   9   0    6.84    1.75 
   7   9   0    6.50    1.86 
   7   9   0    8.33    2.41 
   7   9   0    6.21    2.02 
  -7   9   0    6.73    1.78 
   8  -9   0    1.74    1.92 
  -8  -9   0    0.91    2.03 
  -8  -9   0    3.41    2.52 
   8  -9   0    0.74    2.36 
  -8  -9   0   -0.07    1.87 
   8  -9   0    0.39    1.89 
   8  -9   0    2.14    2.48 
  -8   9   0    0.88    1.84 
  -8   9   0    0.65    1.74 
   8   9   0    1.85    1.95 
   8   9   0   -1.09    2.05 
   8   9   0    0.45    2.35 
  -8   9   0    0.27    2.58 
  -8   9   0    3.35    1.89 
   8   9   0   -0.65    2.08 
  -9  -9   0    6.74    2.50 
   9  -9   0    0.12    2.73 
  -9  -9   0    9.01    3.21 
   9  -9   0    2.57    2.37 
  -9  -9   0    4.81    2.30 
   9  -9   0    8.48    2.94 
   9  -9   0    6.73    2.48 
  -9   9   0    7.63    2.93 
  -9   9   0    4.90    2.16 
   9   9   0    5.81    2.76 
  -9   9   0    5.94    3.42 
  -9   9   0    0.94    2.14 
   9   9   0    5.05    2.39 
   9   9   0    2.37    2.51 
  10  -9   0    1.77    3.37 
 -10  -9   0    0.28    2.47 
  10  -9   0    2.36    2.51 
 -10  -9   0    2.54    2.38 
 -10  -9   0    4.79    3.36 
  10  -9   0    2.86    3.14 
 -10   9   0    2.15    2.52 
  10   9   0    2.82    2.55 
  10   9   0    1.07    2.84 
 -10   9   0    4.71    2.49 
 -10   9   0    0.88    3.31 
  10   9   0   -3.26    2.85 
  11  -9   0    6.63    3.95 
 -11  -9   0    1.11    3.07 
 -11  -9   0    4.34    3.20 
  11  -9   0    2.38    3.05 
  11  -9   0    2.73    3.86 
 -11   9   0    6.37    3.14 
  11   9   0    0.62    3.18 
 -11   9   0    5.78    3.11 
  11   9   0    2.47    2.94 
 -11   9   0    5.36    3.97 
  12  -9   0    3.01    4.92 
 -12  -9   0    3.93    3.92 
  12   9   0    2.23    3.59 
   0 -10   0   28.57    2.20 
   0 -10   0   25.21    2.04 
   0 -10   0   25.45    1.68 
   0 -10   0   25.15    2.15 
   0 -10   0   25.79    1.77 
   0  10   0   27.36    1.83 
   0  10   0   23.98    1.71 
   0  10   0   24.85    1.84 
   0  10   0   28.56    1.84 
   0  10   0   30.78    2.10 
   0  10   0   28.24    2.00 
   1 -10   0   25.65    1.94 
   1 -10   0   27.93    2.05 
  -1 -10   0   29.87    2.30 
   1 -10   0   26.32    2.28 
  -1 -10   0   29.21    2.07 
  -1 -10   0   28.96    1.71 
   1 -10   0   29.41    2.22 
  -1 -10   0   28.08    2.43 
   1  10   0   29.27    1.83 
  -1  10   0   29.69    2.10 
  -1  10   0   28.39    2.05 
   1  10   0   28.44    2.13 
  -1  10   0   31.81    1.97 
   1  10   0   27.19    2.05 
   1  10   0   34.00    2.10 
  -2 -10   0    2.19    1.23 
   2 -10   0   -0.51    1.27 
  -2 -10   0    3.73    1.27 
   2 -10   0    0.30    1.08 
  -2 -10   0    2.19    0.83 
   2 -10   0    1.85    1.56 
  -2 -10   0    1.60    1.26 
  -2  10   0    4.13    1.02 
   2  10   0    1.24    0.81 
  -2  10   0    1.96    0.99 
  -2  10   0    2.98    1.15 
   2  10   0    2.61    1.10 
   2  10   0    2.93    1.29 
   2  10   0    1.59    1.10 
   3 -10   0  158.24    6.94 
  -3 -10   0  161.73    6.88 
   3 -10   0  144.05    6.36 
  -3 -10   0  153.12    7.00 
   3 -10   0  158.00    6.80 
   3 -10   0  155.16    7.08 
  -3 -10   0  157.62    6.62 
   3  10   0  168.64    7.09 
   3  10   0  157.20    6.74 
  -3  10   0  147.14    6.32 
  -3  10   0  163.20    6.59 
  -3  10   0  140.18    6.25 
   3  10   0  150.34    6.50 
  -3  10   0  161.41    6.93 
   3  10   0  158.09    6.77 
  -3  10   0  162.37    6.79 
  -4 -10   0   71.67    3.82 
   4 -10   0   67.99    4.03 
  -4 -10   0   71.08    3.99 
   4 -10   0   57.37    3.53 
  -4 -10   0   71.13    3.42 
   4 -10   0   74.27    3.74 
   4 -10   0   70.30    4.17 
  -4  10   0   65.19    3.29 
   4  10   0   70.20    4.04 
  -4  10   0   61.71    3.14 
  -4  10   0   73.69    3.69 
  -4  10   0   74.32    3.51 
  -4  10   0   69.75    4.01 
   4  10   0   69.75    3.68 
   4  10   0   68.18    3.67 
   4  10   0   71.32    3.42 
  -5 -10   0   22.43    1.87 
   5 -10   0   20.28    2.08 
  -5 -10   0   22.61    2.29 
   5 -10   0   27.70    2.83 
  -5 -10   0   27.42    2.64 
   5 -10   0   24.54    2.58 
   5  10   0   20.91    2.03 
  -5  10   0   20.11    1.87 
   5  10   0   22.53    2.01 
  -5  10   0   18.85    1.99 
  -5  10   0   29.09    2.68 
  -5  10   0   18.75    1.67 
   5  10   0   21.67    2.48 
   5  10   0   21.80    2.12 
   6 -10   0   18.76    2.63 
   6 -10   0   26.29    2.36 
   6 -10   0   24.37    2.44 
   6 -10   0   22.59    2.83 
  -6 -10   0   26.35    2.63 
  -6 -10   0   28.92    2.99 
  -6  10   0   23.72    2.01 
   6  10   0   22.96    2.91 
   6  10   0   23.26    2.39 
  -6  10   0   22.68    2.16 
   6  10   0   25.33    2.39 
  -6  10   0   23.24    2.70 
  -6  10   0   21.97    2.29 
   6  10   0   24.89    2.45 
   7 -10   0   48.96    3.65 
  -7 -10   0   47.81    4.25 
   7 -10   0   46.80    4.30 
  -7 -10   0   58.76    3.95 
   7 -10   0   50.90    4.37 
   7 -10   0   54.52    3.70 
  -7  10   0   50.62    3.34 
  -7  10   0   61.08    4.59 
   7  10   0   49.39    3.73 
   7  10   0   51.81    3.70 
  -7  10   0   51.77    3.61 
   7  10   0   52.62    4.37 
  -7  10   0   53.24    3.56 
   7  10   0   47.75    3.88 
   8 -10   0   33.61    4.18 
   8 -10   0   49.83    3.88 
  -8 -10   0   43.62    3.80 
   8 -10   0   45.18    3.91 
  -8 -10   0   38.55    3.64 
   8 -10   0   37.56    4.20 
  -8 -10   0   55.96    4.62 
  -8  10   0   41.03    3.43 
  -8  10   0   39.09    3.54 
   8  10   0   41.21    3.78 
   8  10   0   44.08    3.79 
   8  10   0   48.76    4.58 
   8  10   0   44.15    3.90 
  -8  10   0   42.80    4.65 
  -8  10   0   47.27    3.71 
  -9 -10   0   16.75    3.02 
   9 -10   0   17.34    3.54 
  -9 -10   0   24.82    3.18 
   9 -10   0   20.66    3.79 
   9 -10   0   22.27    3.21 
   9 -10   0   20.83    3.09 
  -9 -10   0   23.53    3.67 
   9  10   0   25.53    3.28 
  -9  10   0   21.75    2.94 
  -9  10   0   16.23    3.22 
   9  10   0   27.71    3.54 
   9  10   0   21.85    3.46 
  -9  10   0   30.21    4.29 
 -10 -10   0   -0.49    2.61 
  10 -10   0    9.74    2.90 
  10 -10   0    1.58    3.33 
 -10 -10   0    3.08    3.21 
 -10 -10   0    4.84    2.68 
  10 -10   0    1.56    3.05 
  10  10   0   -0.35    2.91 
 -10  10   0   -1.42    3.32 
 -10  10   0    3.85    2.43 
  10  10   0    1.96    2.48 
 -10  10   0    3.68    2.54 
 -11 -10   0   25.73    4.47 
  11 -10   0   24.12    4.06 
  11 -10   0   20.60    4.61 
 -11 -10   0   10.48    3.56 
 -11 -10   0   24.53    4.22 
  11 -10   0   17.32    4.57 
  11  10   0   21.70    4.31 
  11  10   0   24.46    4.08 
 -11  10   0   24.95    3.73 
 -11  10   0   23.01    5.33 
 -11  10   0   26.22    3.84 
  12 -10   0   29.19    5.51 
  12  10   0   31.03    4.87 
 -12  10   0   28.94    4.55 
   0 -11   0    2.15    1.31 
   0 -11   0   -1.66    0.77 
   0 -11   0    1.68    1.17 
   0 -11   0    0.55    1.47 
   0  11   0    1.58    0.98 
   0  11   0   -0.26    1.08 
   0  11   0    2.10    1.10 
   0  11   0    0.19    0.85 
   1 -11   0  210.21    8.93 
   1 -11   0  208.14    8.94 
  -1 -11   0  212.37    8.63 
   1 -11   0  208.59    8.40 
  -1 -11   0  214.94    8.85 
   1 -11   0  211.81    8.69 
   1 -11   0  211.54    8.88 
  -1 -11   0  212.82    8.93 
  -1 -11   0  210.30    8.88 
   1  11   0  211.64    8.79 
   1  11   0  209.85    8.83 
   1  11   0  211.43    8.81 
   1  11   0  214.34    8.64 
  -1  11   0  211.19    8.86 
  -1  11   0  210.98    8.86 
  -1  11   0  208.82    8.69 
  -2 -11   0  269.01   11.30 
   2 -11   0  258.02   11.28 
  -2 -11   0  283.64   11.00 
   2 -11   0  279.67   11.41 
   2 -11   0  270.98   11.47 
  -2 -11   0  275.59   11.40 
  -2 -11   0  276.63   11.23 
  -2  11   0  278.57   11.09 
  -2  11   0  250.35   11.30 
   2  11   0  271.86   11.22 
  -2  11   0  273.49   11.25 
   2  11   0  284.00   11.43 
   2  11   0  282.02   11.25 
   2  11   0  268.47   10.99 
  -3 -11   0   40.72    2.78 
  -3 -11   0   42.43    2.53 
   3 -11   0   38.93    2.98 
   3 -11   0   39.20    2.70 
   3 -11   0   38.68    2.80 
  -3 -11   0   43.85    2.85 
   3  11   0   35.21    2.52 
  -3  11   0   34.81    2.52 
   3  11   0   39.04    2.83 
   3  11   0   34.64    2.10 
  -3  11   0   39.13    2.37 
  -3  11   0   39.28    2.79 
   3  11   0   34.71    2.47 
  -4 -11   0    6.51    1.61 
   4 -11   0    1.34    1.43 
  -4 -11   0    5.97    1.29 
  -4 -11   0    5.33    1.54 
   4 -11   0    6.77    1.89 
   4 -11   0    6.97    1.57 
  -4  11   0    5.12    1.22 
   4  11   0    3.31    1.61 
   4  11   0    2.85    1.24 
   4  11   0    3.54    1.17 
  -4  11   0    4.87    1.51 
   4  11   0    5.30    1.33 
  -4  11   0    5.27    1.28 
  -4  11   0    3.84    0.86 
  -4  11   0    4.20    0.99 
   5 -11   0  110.39    5.51 
   5 -11   0  113.14    5.87 
   5 -11   0  120.82    6.14 
  -5 -11   0  113.09    5.26 
  -5 -11   0  112.26    5.93 
  -5 -11   0  117.47    5.72 
   5  11   0  108.49    5.56 
  -5  11   0  126.39    6.12 
   5  11   0  123.67    5.56 
  -5  11   0  112.47    5.37 
   5  11   0  118.84    5.37 
  -5  11   0  108.59    5.05 
  -5  11   0  116.62    5.57 
   5  11   0  122.29    6.05 
   6 -11   0   82.97    5.16 
   6 -11   0   81.58    5.16 
   6 -11   0   80.74    4.37 
  -6 -11   0   77.16    4.67 
  -6 -11   0   82.84    4.94 
   6  11   0   82.18    4.42 
  -6  11   0   75.99    3.96 
  -6  11   0   83.23    5.16 
   6  11   0   78.18    4.47 
   6  11   0   87.77    5.13 
  -6  11   0   77.60    4.40 
  -6  11   0   83.46    4.33 
   6  11   0   76.86    4.39 
   7 -11   0   57.47    4.06 
   7 -11   0   50.10    4.39 
  -7 -11   0   55.38    4.45 
   7 -11   0   57.68    4.38 
  -7 -11   0   56.12    4.10 
   7 -11   0   60.86    3.94 
  -7  11   0   56.92    4.46 
   7  11   0   57.60    4.63 
   7  11   0   61.51    4.21 
  -7  11   0   48.94    3.38 
  -7  11   0   62.69    3.74 
   7  11   0   59.45    3.93 
  -7  11   0   52.34    3.86 
   7  11   0   51.13    4.02 
   8 -11   0   13.34    2.66 
   8 -11   0   18.58    2.81 
  -8 -11   0   18.27    2.75 
  -8 -11   0   23.08    3.36 
   8 -11   0   16.91    3.29 
   8 -11   0   17.92    3.36 
   8  11   0   23.31    2.88 
  -8  11   0   16.11    2.56 
   8  11   0   19.10    2.66 
   8  11   0   18.29    3.11 
  -8  11   0   19.01    2.55 
  -8  11   0   19.63    3.33 
   8  11   0   13.33    3.22 
  -8  11   0   14.87    2.29 
  -9 -11   0  127.81    8.03 
   9 -11   0  138.92    7.37 
   9 -11   0  126.54    8.09 
   9 -11   0  134.00    7.41 
   9 -11   0  126.42    8.16 
  -9 -11   0  122.15    7.27 
  -9 -11   0  129.41    7.40 
   9  11   0  122.89    7.10 
   9  11   0  122.03    7.62 
   9  11   0  143.35    7.34 
  -9  11   0  137.06    6.98 
  -9  11   0  135.55    8.20 
  -9  11   0  127.82    7.20 
 -10 -11   0   47.79    5.27 
 -10 -11   0   42.96    4.44 
 -10 -11   0   39.26    4.46 
  10 -11   0   39.97    5.10 
  10 -11   0   46.73    4.60 
  10 -11   0   52.78    5.37 
 -10  11   0   46.83    4.45 
  10  11   0   41.02    4.60 
 -10  11   0   41.43    5.60 
  10  11   0   51.16    4.52 
 -10  11   0   51.84    4.26 
 -11 -11   0    0.84    3.40 
 -11 -11   0    1.08    3.33 
  11 -11   0    6.70    4.11 
 -11 -11   0    4.21    3.14 
  11 -11   0    0.90    3.56 
 -11  11   0   11.25    4.61 
 -11  11   0   -4.23    2.53 
  11  11   0    3.59    3.50 
  11  11   0    5.36    3.06 
  12 -11   0   16.76    4.82 
 -12  11   0   12.97    3.92 
  12  11   0    4.23    4.19 
   0 -12   0  181.01    7.53 
   0 -12   0  172.73    7.66 
   0 -12   0  175.85    7.45 
   0 -12   0  168.92    7.28 
   0  12   0  162.08    7.26 
   0  12   0  181.65    7.47 
   0  12   0  187.28    7.50 
   0  12   0  178.17    7.55 
   1 -12   0   14.81    1.83 
   1 -12   0   12.88    1.87 
  -1 -12   0   16.44    1.44 
  -1 -12   0   16.82    1.86 
   1 -12   0   13.90    1.04 
   1 -12   0   14.49    1.50 
  -1 -12   0   13.74    1.54 
  -1 -12   0   16.42    1.82 
   1 -12   0   15.93    1.65 
  -1  12   0   15.85    1.63 
  -1  12   0   13.89    1.15 
  -1  12   0   16.26    1.68 
   1  12   0   15.42    1.60 
   1  12   0   11.05    1.15 
   1  12   0   14.95    1.36 
   1  12   0   14.80    1.55 
  -1  12   0   17.18    1.51 
   1  12   0   15.60    1.62 
  -2 -12   0   -0.21    1.35 
   2 -12   0    0.08    1.13 
  -2 -12   0    1.46    1.40 
  -2 -12   0    0.06    0.74 
   2 -12   0   -0.39    1.46 
   2 -12   0    0.98    1.44 
  -2 -12   0    0.22    1.28 
   2 -12   0    0.81    1.01 
  -2  12   0   -0.05    1.10 
   2  12   0    0.69    0.85 
  -2  12   0    2.50    1.07 
   2  12   0    0.16    1.07 
  -2  12   0    1.56    1.07 
   2  12   0   -0.31    1.12 
   2  12   0    2.81    1.38 
  -3 -12   0  129.25    6.18 
  -3 -12   0  134.90    6.00 
   3 -12   0  133.90    6.31 
   3 -12   0  130.70    6.14 
   3 -12   0  134.57    6.39 
  -3 -12   0  139.91    6.40 
   3  12   0  129.03    6.05 
  -3  12   0  137.00    5.89 
  -3  12   0  135.91    6.29 
   3  12   0  141.38    6.11 
   3  12   0  140.72    6.39 
   3  12   0  131.24    5.76 
  -3  12   0  134.71    6.08 
  -4 -12   0  232.65    9.50 
   4 -12   0  232.49   10.10 
  -4 -12   0  223.46    9.79 
   4 -12   0  229.79    9.67 
   4 -12   0  235.57   10.07 
  -4 -12   0  227.40    9.98 
   4  12   0  223.41    9.63 
  -4  12   0  231.27    9.48 
  -4  12   0  229.10   10.01 
  -4  12   0  211.99    9.21 
   4  12   0  220.18    9.39 
   4  12   0  231.54    9.71 
  -4  12   0  217.34    9.12 
   4  12   0  232.66   10.07 
  -4  12   0  229.36    9.70 
   5 -12   0   25.44    2.77 
  -5 -12   0   25.62    2.56 
   5 -12   0   25.49    2.61 
  -5 -12   0   24.92    2.65 
   5 -12   0   25.53    2.31 
  -5 -12   0   25.39    2.08 
   5  12   0   27.05    2.14 
  -5  12   0   28.80    2.30 
  -5  12   0   24.08    2.62 
  -5  12   0   21.18    2.20 
   5  12   0   27.81    2.82 
   5  12   0   23.01    2.30 
  -5  12   0   21.67    1.80 
   5  12   0   25.00    2.30 
  -6 -12   0   18.72    2.48 
  -6 -12   0   12.79    2.30 
  -6 -12   0   18.07    1.90 
   6 -12   0   16.38    2.51 
   6 -12   0   21.40    2.33 
   6 -12   0   16.06    2.77 
  -6  12   0   14.20    2.07 
  -6  12   0   18.20    1.98 
   6  12   0   15.27    2.64 
  -6  12   0   17.42    1.69 
  -6  12   0   17.41    2.69 
   6  12   0   17.33    2.28 
   6  12   0   14.18    2.14 
   6  12   0   17.67    2.23 
  -7 -12   0   54.25    4.74 
   7 -12   0   59.22    4.84 
   7 -12   0   61.89    4.85 
  -7 -12   0   54.24    4.41 
   7 -12   0   61.03    4.07 
   7  12   0   49.44    4.58 
   7  12   0   56.53    4.15 
  -7  12   0   56.13    3.97 
  -7  12   0   60.61    4.80 
   7  12   0   61.91    4.06 
   7  12   0   58.06    4.03 
  -7  12   0   55.66    3.42 
  -7  12   0   55.40    3.76 
  -8 -12   0   41.95    4.26 
   8 -12   0   44.08    4.59 
   8 -12   0   23.64    3.78 
  -8 -12   0   40.23    3.77 
   8 -12   0   40.61    3.72 
   8  12   0   42.03    3.88 
  -8  12   0   42.25    3.69 
   8  12   0   40.32    3.60 
   8  12   0   44.21    4.51 
   8  12   0   38.01    3.67 
  -8  12   0   39.40    3.46 
  -8  12   0   43.59    4.51 
   9 -12   0    4.10    2.47 
  -9 -12   0    4.32    3.15 
   9 -12   0    0.10    2.93 
  -9 -12   0    6.89    2.44 
  -9 -12   0    7.14    2.68 
   9 -12   0    3.76    3.05 
   9  12   0   -2.18    2.17 
   9  12   0    5.96    2.69 
  -9  12   0    7.88    2.39 
  -9  12   0    6.79    3.37 
  -9  12   0    6.62    2.32 
   9  12   0    6.62    2.82 
 -10 -12   0    4.21    3.43 
  10 -12   0    5.67    3.54 
  10 -12   0    1.94    3.56 
 -10 -12   0    2.71    3.04 
 -10 -12   0    8.57    3.00 
  10  12   0    4.64    2.91 
  10  12   0    2.28    2.98 
 -10  12   0    3.92    2.50 
 -10  12   0    3.51    3.83 
  11 -12   0    7.49    4.17 
 -11 -12   0   19.43    4.38 
 -11 -12   0   18.56    3.84 
  11 -12   0   13.63    4.62 
 -11 -12   0   13.99    3.56 
 -11  12   0   15.89    3.54 
 -11  12   0   18.33    3.44 
 -11  12   0    8.14    4.80 
  11  12   0   14.67    4.06 
  11  12   0   17.68    3.72 
  12 -12   0   26.70    5.45 
   0 -13   0    0.29    0.97 
   0 -13   0   -0.34    1.25 
   0 -13   0    0.09    1.54 
   0 -13   0    1.79    0.88 
   0 -13   0    0.01    1.44 
   0  13   0    0.32    1.17 
   0  13   0    1.97    1.26 
   0  13   0    0.73    1.07 
   0  13   0    1.31    0.94 
   1 -13   0    1.46    1.24 
   1 -13   0    3.66    1.48 
   1 -13   0    2.51    1.60 
   1 -13   0   -0.11    0.63 
  -1 -13   0    1.75    1.13 
  -1 -13   0    1.13    1.06 
   1 -13   0    1.60    1.15 
  -1 -13   0   -0.26    1.57 
  -1 -13   0    1.17    1.44 
   1  13   0    1.61    0.86 
  -1  13   0    1.53    0.71 
   1  13   0    1.22    0.95 
  -1  13   0    2.17    1.14 
  -1  13   0    1.73    1.17 
   1  13   0    0.61    1.09 
   1  13   0    0.75    1.14 
   1  13   0   -0.13    1.13 
  -1  13   0    1.23    1.15 
  -2 -13   0   -0.41    1.28 
  -2 -13   0    1.60    1.48 
   2 -13   0    0.59    1.09 
   2 -13   0    0.75    1.54 
  -2 -13   0    0.42    1.41 
   2 -13   0    1.86    1.24 
   2 -13   0    0.39    1.57 
  -2  13   0    1.13    1.10 
   2  13   0   -1.45    1.24 
  -2  13   0    1.46    1.10 
   2  13   0   -1.51    1.09 
   2  13   0    0.10    0.89 
   2  13   0    1.03    1.19 
  -2  13   0   -0.07    1.09 
  -3 -13   0   12.67    1.85 
   3 -13   0   12.58    2.03 
   3 -13   0   15.50    2.00 
  -3 -13   0   17.31    1.78 
   3 -13   0   14.38    1.90 
  -3 -13   0   14.50    1.89 
  -3  13   0   16.40    1.72 
   3  13   0   16.26    1.81 
  -3  13   0   18.64    1.97 
   3  13   0   14.90    1.94 
   3  13   0   15.85    1.72 
   3  13   0   14.28    1.41 
  -3  13   0   15.34    1.61 
   4 -13   0    0.10    1.54 
  -4 -13   0    0.16    1.55 
  -4 -13   0    1.46    1.30 
  -4 -13   0    3.44    1.52 
   4 -13   0   -0.34    1.71 
   4 -13   0    0.92    1.50 
  -4  13   0    1.61    1.22 
  -4  13   0   -1.81    1.34 
  -4  13   0    0.25    0.77 
   4  13   0    0.02    1.25 
   4  13   0    1.23    1.04 
   4  13   0    2.02    1.59 
  -4  13   0   -0.30    0.62 
  -4  13   0    2.28    1.25 
   4  13   0    1.44    1.23 
   5 -13   0    1.11    1.62 
  -5 -13   0    1.82    1.34 
  -5 -13   0    4.31    1.80 
   5 -13   0    2.34    1.91 
  -5 -13   0    1.63    1.73 
   5 -13   0    4.18    1.68 
   5  13   0    2.58    1.28 
  -5  13   0    1.39    1.37 
   5  13   0    4.00    1.50 
   5  13   0    1.81    1.71 
   5  13   0    2.59    1.49 
  -5  13   0    2.54    1.29 
  -5  13   0    2.11    1.65 
  -5  13   0    2.10    0.93 
   6 -13   0    3.67    2.29 
  -6 -13   0    0.56    1.85 
  -6 -13   0   -0.74    1.71 
   6 -13   0    3.72    1.79 
  -6 -13   0    0.40    1.42 
   6 -13   0    1.79    1.86 
  -6  13   0    3.19    1.54 
   6  13   0   -0.36    1.51 
  -6  13   0   -0.95    1.10 
  -6  13   0    0.63    1.82 
  -6  13   0    1.69    1.50 
   6  13   0    3.00    1.68 
   6  13   0    0.69    1.41 
   6  13   0   -0.80    1.88 
   7 -13   0    0.85    1.95 
  -7 -13   0    0.90    2.09 
   7 -13   0    1.58    2.16 
  -7 -13   0    4.08    2.27 
   7 -13   0    0.25    2.38 
   7  13   0    0.92    2.30 
  -7  13   0   -0.59    1.67 
   7  13   0    2.50    1.89 
   7  13   0    2.77    2.01 
   7  13   0    1.52    1.75 
  -7  13   0   -1.27    2.16 
  -7  13   0    0.82    1.43 
  -7  13   0    1.48    1.75 
   8 -13   0    1.14    2.31 
  -8 -13   0    6.78    2.56 
   8 -13   0    1.80    2.67 
   8 -13   0   -1.95    2.78 
  -8 -13   0    6.94    2.93 
   8  13   0    2.04    2.15 
   8  13   0   10.17    3.09 
   8  13   0    7.03    2.32 
  -8  13   0    6.05    2.13 
  -8  13   0    5.22    2.94 
  -8  13   0    4.25    2.07 
   8  13   0    3.60    2.11 
   9 -13   0   -0.34    2.87 
   9 -13   0   -0.08    2.33 
  -9 -13   0   -2.21    2.81 
  -9 -13   0    3.18    2.32 
  -9 -13   0    1.29    2.56 
   9 -13   0    4.22    3.19 
   9  13   0   -0.90    2.22 
   9  13   0    3.63    2.69 
  -9  13   0    0.93    2.30 
  -9  13   0    3.08    3.12 
  -9  13   0   -0.15    2.13 
 -10 -13   0    2.59    2.83 
 -10 -13   0    0.24    2.60 
  10 -13   0    1.41    3.64 
 -10 -13   0   -0.60    3.14 
  10 -13   0   -1.56    3.61 
 -10  13   0   -0.40    2.58 
  10  13   0    0.34    2.89 
  10  13   0    3.05    2.63 
 -10  13   0    0.45    3.62 
  11 -13   0   -0.53    3.72 
 -11 -13   0   -1.67    3.11 
 -11 -13   0    3.44    3.68 
 -11 -13   0   -2.58    2.78 
  11 -13   0    2.77    3.97 
  11  13   0   -0.66    3.31 
 -11  13   0    0.45    2.96 
 -11  13   0   -0.28    2.90 
  11  13   0    3.35    3.07 
 -11  13   0    4.61    4.51 
  12 -13   0    5.71    4.59 
   0 -14   0  247.49   10.24 
   0 -14   0  242.71    9.99 
   0 -14   0  227.06    9.83 
   0 -14   0  246.03   10.07 
   0  14   0  225.91    9.81 
   0  14   0  246.54    9.99 
   0  14   0  244.71   10.01 
   0  14   0  241.20   10.09 
  -1 -14   0   38.80    2.58 
   1 -14   0   43.05    3.08 
   1 -14   0   41.78    2.96 
   1 -14   0   38.86    2.63 
   1 -14   0   38.27    1.99 
  -1 -14   0   40.21    2.43 
  -1 -14   0   42.57    2.91 
  -1 -14   0   44.53    3.11 
   1  14   0   42.43    2.64 
  -1  14   0   41.07    2.61 
   1  14   0   44.18    2.80 
   1  14   0   45.70    2.71 
  -1  14   0   37.26    2.07 
   1  14   0   37.41    2.41 
  -1  14   0   43.58    2.71 
  -1  14   0   46.26    2.81 
  -2 -14   0    2.60    1.41 
   2 -14   0    1.61    1.61 
  -2 -14   0    2.55    1.63 
   2 -14   0   -0.24    1.15 
   2 -14   0    1.14    1.62 
  -2 -14   0    2.00    1.54 
   2 -14   0    3.05    1.31 
  -2  14   0    2.17    1.22 
   2  14   0    0.02    1.30 
  -2  14   0    2.18    1.18 
  -2  14   0    2.55    1.31 
   2  14   0    1.82    1.25 
   2  14   0    1.67    0.97 
   2  14   0    0.67    1.23 
  -3 -14   0   97.85    4.96 
  -3 -14   0  100.73    4.82 
   3 -14   0  101.07    5.08 
   3 -14   0   92.13    5.16 
  -3 -14   0   97.11    5.07 
   3 -14   0  104.96    5.03 
  -3  14   0  100.59    4.84 
   3  14   0  100.39    5.11 
  -3  14   0   96.51    5.03 
  -3  14   0   96.50    4.58 
   3  14   0   96.27    4.80 
   3  14   0  106.39    4.90 
   3  14   0   90.33    4.40 
  -4 -14   0  128.89    6.30 
   4 -14   0  135.15    6.47 
   4 -14   0  129.62    6.22 
   4 -14   0  133.29    6.61 
  -4 -14   0  132.30    6.50 
  -4 -14   0  127.92    6.01 
   4  14   0  135.26    6.58 
  -4  14   0  135.27    5.96 
   4  14   0  129.45    6.16 
  -4  14   0  133.59    6.18 
   4  14   0  135.92    6.15 
  -4  14   0  137.29    6.42 
   4  14   0  121.43    5.71 
   5 -14   0    7.24    2.20 
   5 -14   0    9.90    2.10 
  -5 -14   0   12.77    2.21 
   5 -14   0   11.31    2.02 
  -5 -14   0   12.63    1.78 
  -5 -14   0    9.21    2.12 
   5  14   0    8.88    2.11 
  -5  14   0   10.73    1.60 
   5  14   0   11.50    1.52 
  -5  14   0   10.50    1.75 
  -5  14   0   10.88    2.10 
   5  14   0   10.29    1.78 
   5  14   0   12.87    1.97 
  -5  14   0    7.78    1.08 
  -6 -14   0    4.43    2.11 
  -6 -14   0   -0.01    1.55 
   6 -14   0    5.22    1.94 
   6 -14   0    3.10    2.10 
   6 -14   0    3.76    2.35 
  -6 -14   0    7.20    2.06 
  -6  14   0    2.61    1.11 
  -6  14   0    3.25    1.57 
   6  14   0    2.66    2.12 
  -6  14   0    3.45    1.70 
  -6  14   0    4.81    2.13 
   6  14   0    0.64    1.67 
   6  14   0    6.94    1.67 
   6  14   0    3.09    1.71 
   7 -14   0   62.85    4.48 
   7 -14   0   69.87    5.46 
   7 -14   0   62.91    5.11 
  -7 -14   0   63.46    4.74 
  -7 -14   0   61.59    5.07 
   7  14   0   62.68    5.11 
   7  14   0   66.65    4.55 
   7  14   0   66.60    4.18 
   7  14   0   63.15    4.37 
  -7  14   0   67.45    4.45 
  -7  14   0   70.30    4.22 
  -7  14   0   77.25    5.35 
  -8 -14   0   68.81    5.55 
   8 -14   0   54.43    5.05 
  -8 -14   0   62.60    5.00 
   8 -14   0   60.25    4.44 
   8 -14   0   63.07    5.42 
   8  14   0   59.76    4.76 
  -8  14   0   68.19    5.52 
  -8  14   0   66.11    4.40 
  -8  14   0   63.26    4.65 
   8  14   0   59.73    4.49 
   8  14   0   63.42    4.69 
   8  14   0   64.00    5.42 
   9 -14   0   10.88    3.62 
   9 -14   0   11.13    3.59 
  -9 -14   0   15.63    3.21 
   9 -14   0   15.26    3.13 
  -9 -14   0   11.53    3.42 
  -9  14   0    6.94    2.61 
   9  14   0   14.10    3.11 
  -9  14   0    7.45    3.73 
   9  14   0   12.17    2.79 
  -9  14   0   11.23    2.95 
 -10 -14   0   10.43    3.59 
 -10 -14   0   13.93    3.35 
  10 -14   0   14.41    4.31 
  10 -14   0   18.66    4.12 
 -10 -14   0   13.88    3.76 
  10  14   0   15.05    3.44 
 -10  14   0   11.72    3.13 
  10  14   0   18.00    3.71 
 -10  14   0   13.20    4.50 
 -10  14   0   18.44    4.05 
  11 -14   0   25.64    5.30 
 -11 -14   0   24.88    3.97 
 -11 -14   0   25.89    4.56 
 -11 -14   0   27.99    4.89 
  11 -14   0   15.24    4.62 
  11  14   0   22.08    3.80 
 -11  14   0   23.27    4.01 
 -11  14   0   24.32    5.62 
  11  14   0   27.80    4.13 
  12 -14   0   23.10    5.76 
 -12  14   0   21.65    4.06 
   0 -15   0    4.68    1.42 
   0 -15   0    2.42    1.59 
   0 -15   0    2.19    1.07 
   0 -15   0    3.80    1.78 
   0  15   0    1.53    1.28 
   0  15   0    4.49    1.31 
   0  15   0    3.50    1.06 
   0  15   0    4.37    1.36 
   1 -15   0  122.59    5.51 
   1 -15   0  122.62    5.73 
  -1 -15   0  123.87    5.71 
  -1 -15   0  118.94    5.33 
   1 -15   0  125.46    5.89 
  -1 -15   0  122.42    5.58 
  -1 -15   0  119.65    5.85 
   1  15   0  118.09    5.54 
   1  15   0  115.50    5.64 
  -1  15   0  111.96    5.08 
   1  15   0  121.96    5.42 
  -1  15   0  124.70    5.74 
  -1  15   0  127.96    5.56 
   1  15   0  122.11    5.57 
  -1  15   0  121.50    5.69 
   2 -15   0  247.39   10.20 
  -2 -15   0  249.91   10.62 
   2 -15   0  248.35   10.61 
   2 -15   0  242.51   10.57 
  -2 -15   0  252.27   10.53 
   2 -15   0  240.71   10.65 
  -2 -15   0  246.94   10.56 
   2  15   0  247.76   10.46 
  -2  15   0  238.70   10.56 
  -2  15   0  248.45   10.49 
   2  15   0  249.17   10.56 
   2  15   0  248.33   10.18 
  -2  15   0  257.75   10.29 
   3 -15   0  106.11    5.23 
  -3 -15   0  100.88    5.23 
  -3 -15   0  102.56    5.17 
   3 -15   0   99.53    5.20 
  -3 -15   0  106.21    5.06 
   3 -15   0  101.20    5.45 
   3  15   0   97.14    4.58 
  -3  15   0  103.72    5.05 
   3  15   0  101.25    5.01 
   3  15   0  111.48    5.29 
   3  15   0  107.72    5.07 
  -3  15   0   98.72    5.19 
  -3  15   0   99.71    4.82 
   4 -15   0   12.38    2.06 
  -4 -15   0   14.25    2.06 
   4 -15   0   14.08    2.17 
   4 -15   0   13.41    2.28 
  -4 -15   0   13.90    1.90 
  -4 -15   0   13.18    2.10 
   4  15   0   16.56    1.93 
   4  15   0   14.38    1.58 
  -4  15   0   14.66    1.74 
   4  15   0   15.99    1.96 
  -4  15   0   12.42    2.07 
  -4  15   0   15.50    1.90 
   4  15   0   15.80    2.22 
   5 -15   0  143.63    6.57 
   5 -15   0  143.94    7.09 
  -5 -15   0  138.81    6.68 
  -5 -15   0  134.55    6.27 
  -5 -15   0  140.41    6.93 
   5 -15   0  137.18    6.86 
  -5  15   0  122.39    6.76 
   5  15   0  139.37    6.22 
  -5  15   0  127.79    5.62 
   5  15   0  137.57    6.55 
   5  15   0  132.42    6.40 
  -5  15   0  135.99    6.25 
   5  15   0  130.33    6.89 
  -5  15   0  135.56    6.53 
  -6 -15   0   68.71    4.69 
   6 -15   0   82.11    5.28 
  -6 -15   0   75.47    4.17 
   6 -15   0   69.70    4.77 
   6 -15   0   75.60    4.51 
   6  15   0   76.62    4.41 
  -6  15   0   70.77    4.82 
  -6  15   0   63.60    3.45 
   6  15   0   72.13    4.99 
  -6  15   0   76.78    4.18 
   6  15   0   71.26    4.49 
  -6  15   0   68.14    4.39 
   6  15   0   72.62    4.08 
   7 -15   0   54.38    4.88 
   7 -15   0   58.12    4.25 
  -7 -15   0   53.98    4.50 
   7 -15   0   50.34    4.68 
  -7 -15   0   52.99    4.73 
  -7  15   0   58.94    3.91 
  -7  15   0   48.64    4.65 
   7  15   0   63.64    4.18 
   7  15   0   52.65    4.27 
   7  15   0   59.34    3.82 
  -7  15   0   55.61    4.21 
   7  15   0   56.53    4.86 
   8 -15   0    6.97    3.30 
   8 -15   0   11.85    3.21 
  -8 -15   0    6.39    2.85 
  -8 -15   0   14.96    3.38 
   8 -15   0   11.38    2.53 
   8  15   0    6.82    3.04 
  -8  15   0   11.96    2.35 
  -8  15   0    8.54    2.44 
   8  15   0    9.34    2.57 
   8  15   0    9.28    2.58 
  -8  15   0   11.72    3.50 
   8  15   0   11.87    2.55 
  -9 -15   0   77.52    5.92 
   9 -15   0   79.12    5.84 
   9 -15   0   83.08    6.64 
   9 -15   0   61.86    6.06 
  -9 -15   0   76.59    6.55 
   9  15   0   75.62    5.95 
   9  15   0   75.31    5.51 
  -9  15   0   77.93    7.05 
  -9  15   0   91.03    5.58 
  -9  15   0   76.12    5.56 
  10 -15   0   60.81    5.98 
 -10 -15   0   59.13    5.16 
  10 -15   0   41.64    5.77 
 -10 -15   0   61.17    5.32 
 -10 -15   0   51.09    5.81 
 -10  15   0   57.21    4.80 
  10  15   0   54.04    5.20 
  10  15   0   57.25    5.14 
 -10  15   0   63.09    6.57 
 -10  15   0   58.09    5.05 
  11 -15   0    3.97    4.14 
  11 -15   0    5.69    4.40 
 -11 -15   0    4.35    3.39 
 -11 -15   0    3.38    3.32 
 -11 -15   0    3.35    3.76 
 -11  15   0   10.08    3.64 
 -11  15   0    4.38    2.91 
  11  15   0    4.14    3.21 
 -11  15   0    7.97    4.87 
  11  15   0    6.30    3.62 
   0 -16   0   25.10    2.30 
   0 -16   0   22.96    1.94 
   0 -16   0   19.56    2.42 
   0 -16   0   21.02    2.01 
   0  16   0   25.35    2.11 
   0  16   0   21.36    1.87 
   0  16   0   24.00    2.01 
   0  16   0   25.74    2.21 
  -1 -16   0   18.68    2.30 
   1 -16   0   17.22    2.24 
   1 -16   0   16.34    2.05 
  -1 -16   0   14.82    1.77 
   1 -16   0   15.27    1.32 
   1 -16   0   14.62    1.30 
  -1 -16   0   17.26    1.66 
  -1 -16   0   16.61    2.08 
   1 -16   0   18.33    1.93 
  -1  16   0   21.69    1.91 
   1  16   0   16.10    1.60 
  -1  16   0   16.50    1.41 
   1  16   0   14.80    1.80 
  -1  16   0   19.09    1.99 
   1  16   0   16.52    1.79 
   1  16   0   20.95    2.06 
  -1  16   0   19.34    2.02 
   2 -16   0    7.65    1.63 
   2 -16   0    7.55    1.93 
  -2 -16   0    8.59    1.89 
  -2 -16   0    5.38    1.77 
  -2 -16   0    6.32    1.67 
   2 -16   0    6.36    1.87 
   2 -16   0    7.45    1.47 
  -2  16   0    5.59    1.42 
   2  16   0    7.17    1.59 
   2  16   0    5.20    1.20 
   2  16   0    6.36    1.48 
   2  16   0    5.36    1.50 
  -2  16   0    3.52    1.50 
  -2  16   0    5.62    1.45 
   3 -16   0   54.99    3.75 
   3 -16   0   53.76    3.56 
  -3 -16   0   58.41    3.61 
  -3 -16   0   58.72    3.74 
   3 -16   0   56.57    3.94 
  -3 -16   0   57.51    3.67 
  -3  16   0   54.27    3.53 
  -3  16   0   56.31    3.44 
   3  16   0   59.73    3.73 
   3  16   0   57.79    3.44 
   3  16   0   54.50    2.97 
  -3  16   0   58.67    3.31 
   3  16   0   61.23    3.58 
   4 -16   0   40.69    3.20 
  -4 -16   0   39.00    2.97 
   4 -16   0   38.29    3.15 
   4 -16   0   37.41    3.39 
  -4 -16   0   35.59    3.03 
  -4 -16   0   36.94    3.19 
   4  16   0   35.83    2.45 
   4  16   0   37.97    2.97 
   4  16   0   38.00    2.93 
  -4  16   0   40.44    2.96 
   4  16   0   42.37    3.41 
  -4  16   0   35.68    2.71 
  -4  16   0   34.33    3.05 
  -5 -16   0   23.60    2.89 
  -5 -16   0   25.72    2.81 
   5 -16   0   21.74    2.92 
   5 -16   0   22.51    2.84 
  -5 -16   0   26.08    2.42 
   5 -16   0   25.01    2.65 
   5  16   0   23.36    2.12 
  -5  16   0   21.55    2.69 
   5  16   0   27.00    2.50 
  -5  16   0   26.09    2.36 
   5  16   0   31.17    3.18 
   5  16   0   32.26    2.79 
  -5  16   0   25.21    2.46 
   6 -16   0   15.37    2.48 
  -6 -16   0   21.53    2.89 
  -6 -16   0   19.81    2.34 
   6 -16   0   10.63    2.97 
   6 -16   0   12.47    2.66 
  -6 -16   0   15.26    2.71 
  -6  16   0   14.66    2.31 
   6  16   0   14.91    2.41 
  -6  16   0   15.29    2.07 
   6  16   0   16.61    2.28 
   6  16   0   15.90    2.10 
  -6  16   0   12.48    2.55 
   6  16   0   21.53    3.12 
   7 -16   0   30.93    3.09 
  -7 -16   0   27.07    3.51 
   7 -16   0   20.00    3.65 
  -7 -16   0   26.83    3.29 
   7 -16   0   21.87    3.47 
   7  16   0   28.39    3.67 
   7  16   0   25.53    3.07 
  -7  16   0   26.64    2.73 
  -7  16   0   20.92    2.91 
  -7  16   0   32.84    3.81 
   7  16   0   26.23    2.91 
   7  16   0   29.11    2.95 
   8 -16   0   21.20    3.89 
   8 -16   0   24.44    3.36 
  -8 -16   0   23.28    3.53 
   8 -16   0   16.71    3.58 
  -8 -16   0   22.68    3.80 
  -8  16   0   19.66    3.04 
  -8  16   0   26.45    4.22 
   8  16   0   27.04    3.30 
  -8  16   0   22.46    2.96 
   8  16   0   19.62    3.09 
   8  16   0   26.06    3.98 
   9 -16   0    3.64    2.89 
  -9 -16   0    0.49    2.72 
  -9 -16   0    0.71    3.01 
   9 -16   0    1.97    3.48 
   9 -16   0    2.30    3.40 
   9  16   0    0.22    2.49 
  -9  16   0    5.98    3.01 
  -9  16   0    0.30    2.41 
   9  16   0    2.01    2.38 
  -9  16   0    0.85    3.47 
 -10 -16   0    1.33    3.31 
 -10 -16   0    3.60    2.90 
 -10 -16   0    1.00    3.19 
  10 -16   0    4.74    3.93 
  10 -16   0   -0.01    3.70 
 -10  16   0    3.14    2.90 
 -10  16   0   10.13    2.82 
  10  16   0    3.89    2.72 
 -10  16   0    9.19    4.26 
  10  16   0   -1.44    2.69 
  11 -16   0    9.37    4.60 
 -11 -16   0   14.75    4.06 
 -11 -16   0    9.35    3.87 
  11 -16   0   18.98    4.79 
 -11 -16   0   15.28    4.30 
  11  16   0    9.83    3.91 
 -11  16   0   18.07    5.79 
 -11  16   0   19.06    4.05 
  11  16   0   12.44    4.05 
   0 -17   0   -1.58    1.80 
   0 -17   0    0.03    1.45 
   0 -17   0    1.58    1.70 
   0 -17   0   -0.52    1.08 
   0  17   0    0.72    1.28 
   0  17   0   -0.81    1.29 
   0  17   0    1.07    1.10 
   0  17   0    0.70    1.41 
  -1 -17   0    2.73    1.39 
   1 -17   0   -3.69    1.46 
  -1 -17   0    2.45    1.66 
   1 -17   0    0.79    0.81 
  -1 -17   0    0.45    1.24 
   1 -17   0    1.29    1.58 
  -1 -17   0    2.74    1.86 
   1 -17   0   -1.42    1.76 
   1 -17   0    0.37    0.88 
   1  17   0    2.03    1.28 
   1  17   0    1.13    1.44 
  -1  17   0    1.81    1.52 
   1  17   0    0.44    1.12 
  -1  17   0   -0.60    1.33 
  -1  17   0    0.94    0.85 
   1  17   0    0.38    1.33 
  -1  17   0   -0.09    1.35 
   2 -17   0   20.24    2.54 
  -2 -17   0   25.35    2.39 
  -2 -17   0   29.54    2.60 
   2 -17   0   25.63    2.65 
   2 -17   0   25.73    2.06 
   2 -17   0   24.41    2.46 
  -2 -17   0   22.94    2.52 
   2  17   0   20.57    2.13 
   2  17   0   26.39    2.23 
   2  17   0   22.96    2.28 
  -2  17   0   24.30    2.07 
   2  17   0   24.86    1.92 
  -2  17   0   23.70    2.25 
  -2  17   0   22.02    2.37 
   3 -17   0   31.23    2.72 
  -3 -17   0   27.11    2.57 
   3 -17   0   28.25    2.94 
  -3 -17   0   23.42    2.53 
  -3 -17   0   24.88    2.41 
   3 -17   0   26.37    2.66 
  -3  17   0   25.14    2.13 
   3  17   0   32.34    2.58 
   3  17   0   22.64    1.91 
   3  17   0   26.38    2.35 
  -3  17   0   25.61    2.31 
  -3  17   0   25.65    2.57 
   3  17   0   26.26    2.59 
   4 -17   0    0.00    1.75 
  -4 -17   0    1.36    1.72 
   4 -17   0   -0.57    1.54 
  -4 -17   0   -3.91    1.45 
  -4 -17   0   -0.06    1.59 
   4 -17   0   -0.68    1.85 
   4  17   0   -0.02    1.15 
   4  17   0    2.63    1.74 
   4  17   0   -0.14    1.36 
   4  17   0    0.17    1.55 
  -4  17   0    1.20    1.36 
  -4  17   0    0.62    1.58 
  -4  17   0   -0.88    1.32 
  -5 -17   0   17.15    2.57 
  -5 -17   0   19.59    2.67 
   5 -17   0   17.66    2.52 
  -5 -17   0   22.37    2.32 
   5 -17   0   22.62    3.10 
   5 -17   0   17.11    2.48 
  -5  17   0   19.17    2.65 
   5  17   0   20.03    2.73 
   5  17   0   18.53    2.06 
  -5  17   0   18.82    2.09 
   5  17   0   20.04    2.48 
  -5  17   0   17.52    2.27 
   5  17   0   16.31    2.16 
   6 -17   0    7.65    2.25 
  -6 -17   0    6.89    2.37 
   6 -17   0    9.49    2.55 
   6 -17   0    6.79    2.89 
  -6 -17   0    5.52    1.98 
  -6 -17   0    3.38    2.26 
  -6  17   0    4.10    1.94 
  -6  17   0    5.33    2.54 
   6  17   0    5.23    2.02 
  -6  17   0    7.40    1.88 
   6  17   0    5.80    1.80 
   6  17   0    5.61    2.05 
   6  17   0    8.63    2.63 
  -7 -17   0    1.79    2.50 
  -7 -17   0    2.94    2.60 
  -7 -17   0    0.25    2.05 
   7 -17   0   -0.46    2.69 
   7 -17   0    1.66    2.54 
   7 -17   0    4.16    2.33 
   7  17   0    2.98    2.11 
   7  17   0    1.20    1.66 
  -7  17   0    0.52    1.78 
  -7  17   0    3.26    2.06 
  -7  17   0    0.53    2.76 
   7  17   0   -1.05    2.37 
   7  17   0    3.41    2.08 
   8 -17   0   -1.92    2.35 
   8 -17   0    3.35    3.08 
  -8 -17   0   -3.30    2.57 
   8 -17   0   -0.70    3.09 
  -8 -17   0    5.70    2.84 
  -8  17   0    0.48    2.22 
   8  17   0    2.34    2.80 
   8  17   0    0.12    2.06 
  -8  17   0    0.98    1.99 
  -8  17   0    2.29    3.10 
   8  17   0    3.16    2.43 
   9 -17   0    0.46    3.08 
   9 -17   0    3.14    2.90 
  -9 -17   0    8.85    3.46 
   9 -17   0   -0.11    3.41 
  -9 -17   0    4.07    3.02 
  -9  17   0    4.30    2.46 
   9  17   0    3.60    2.66 
  -9  17   0    3.51    2.63 
   9  17   0    6.46    2.93 
  -9  17   0    4.36    3.62 
 -10 -17   0    3.52    2.76 
  10 -17   0    7.41    4.28 
 -10 -17   0    7.53    3.62 
  10 -17   0    0.87    4.02 
 -10 -17   0    1.58    3.21 
  10  17   0    4.05    3.16 
 -10  17   0    5.99    4.55 
 -10  17   0    5.59    2.98 
  10  17   0   -0.80    2.68 
 -10  17   0    2.76    2.56 
 -11 -17   0    1.79    3.60 
  11 -17   0    7.81    4.73 
 -11  17   0    4.34    2.97 
 -11  17   0    2.14    3.35 
  11  17   0    8.16    3.54 
   0 -18   0  442.62   17.97 
   0 -18   0  439.31   18.24 
   0 -18   0  455.32   18.07 
   0 -18   0  421.75   17.81 
   0  18   0  455.75   18.04 
   0  18   0  420.06   17.80 
   0  18   0  456.63   18.04 
   0  18   0  452.87   18.19 
   1 -18   0  104.33    5.70 
  -1 -18   0  113.37    5.53 
   1 -18   0  110.71    5.36 
   1 -18   0  109.23    5.48 
  -1 -18   0  110.62    5.07 
  -1 -18   0  102.13    5.30 
  -1 -18   0  107.97    5.70 
   1 -18   0  107.46    4.85 
  -1  18   0  113.78    5.35 
   1  18   0  114.89    5.39 
   1  18   0  114.57    5.52 
  -1  18   0  112.22    5.54 
  -1  18   0  107.75    4.81 
   1  18   0  118.83    5.25 
  -1  18   0  114.09    5.45 
   1  18   0  117.80    5.33 
  -2 -18   0    2.82    1.93 
  -2 -18   0    5.09    1.66 
   2 -18   0    3.64    1.83 
   2 -18   0    0.94    1.49 
   2 -18   0    5.88    1.69 
   2 -18   0    2.90    1.92 
  -2 -18   0    3.64    1.83 
   2  18   0    5.95    1.51 
   2  18   0    6.24    1.62 
  -2  18   0    2.59    1.56 
   2  18   0    3.62    1.24 
  -2  18   0    7.12    1.69 
   2  18   0    3.92    1.57 
  -2  18   0    3.24    1.46 
  -3 -18   0  121.90    6.18 
   3 -18   0  129.28    6.42 
  -3 -18   0  117.94    6.04 
   3 -18   0  128.88    6.27 
  -3 -18   0  121.16    6.16 
   3 -18   0  128.32    6.20 
   3  18   0  112.28    5.48 
   3  18   0  125.83    5.98 
  -3  18   0  122.80    6.02 
   3  18   0  126.90    6.04 
   3  18   0  129.23    6.28 
  -3  18   0  124.47    6.27 
  -3  18   0  127.94    5.80 
  -4 -18   0  156.65    7.27 
   4 -18   0  155.68    7.80 
  -4 -18   0  160.93    7.52 
   4 -18   0  159.12    7.49 
   4 -18   0  152.38    7.69 
  -4 -18   0  159.09    7.74 
  -4  18   0  149.33    7.38 
  -4  18   0  148.43    7.57 
   4  18   0  159.75    7.30 
   4  18   0  145.01    6.87 
   4  18   0  178.67    7.84 
  -4  18   0  167.27    7.16 
   4  18   0  161.53    7.42 
   5 -18   0   33.13    3.06 
   5 -18   0   23.66    3.17 
  -5 -18   0   32.01    3.08 
  -5 -18   0   30.70    3.17 
   5 -18   0   26.31    3.27 
  -5 -18   0   32.83    2.77 
  -5  18   0   33.04    2.66 
   5  18   0   27.76    2.75 
   5  18   0   30.53    2.74 
   5  18   0   27.61    2.36 
   5  18   0   29.78    3.23 
  -5  18   0   27.28    3.11 
  -5  18   0   25.80    2.67 
   6 -18   0    0.42    2.54 
  -6 -18   0    4.08    2.39 
  -6 -18   0    1.44    1.96 
  -6 -18   0    2.22    2.27 
   6 -18   0    3.57    2.27 
   6 -18   0    2.35    2.16 
  -6  18   0    2.67    2.29 
   6  18   0    3.17    1.64 
   6  18   0    3.92    1.89 
   6  18   0    1.91    2.02 
  -6  18   0    1.56    1.88 
   6  18   0    0.72    2.31 
  -6  18   0    5.12    1.88 
   7 -18   0   93.47    6.81 
  -7 -18   0   92.96    6.67 
  -7 -18   0  105.67    5.89 
   7 -18   0  107.59    6.06 
  -7 -18   0  109.77    6.63 
   7 -18   0  105.88    7.17 
  -7  18   0  110.08    6.14 
   7  18   0  104.33    6.01 
   7  18   0  105.48    6.05 
  -7  18   0  112.13    5.94 
   7  18   0  110.75    6.97 
  -7  18   0  105.21    6.76 
  -8 -18   0  103.50    6.87 
  -8 -18   0  111.73    7.23 
   8 -18   0   99.23    7.33 
   8 -18   0  103.21    7.60 
   8 -18   0  103.36    6.40 
  -8  18   0  117.12    6.08 
   8  18   0   91.31    6.31 
   8  18   0  116.41    7.39 
   8  18   0  101.36    6.31 
  -8  18   0   99.06    7.26 
  -8  18   0  101.04    6.36 
  -9 -18   0   16.60    3.94 
   9 -18   0   16.45    4.39 
   9 -18   0   13.64    3.13 
   9 -18   0    9.97    3.90 
  -9 -18   0   23.56    3.87 
   9  18   0   20.48    3.48 
  -9  18   0   13.79    2.72 
  -9  18   0   15.66    3.15 
   9  18   0   17.62    3.08 
  -9  18   0    9.09    4.00 
  10 -18   0   16.68    4.73 
 -10 -18   0   10.69    3.20 
 -10 -18   0   12.01    3.83 
  10 -18   0   11.91    4.40 
 -10 -18   0   11.72    3.73 
 -10  18   0   12.13    3.41 
 -10  18   0   11.58    4.88 
  10  18   0   11.27    3.55 
 -10  18   0    9.62    2.87 
  10  18   0   17.35    3.43 
 -11 -18   0   37.84    5.04 
  11 -18   0   42.79    6.07 
  11  18   0   35.81    4.93 
 -11  18   0   45.64    5.32 
   0 -19   0    2.06    1.95 
   0 -19   0    3.37    1.84 
   0 -19   0    3.44    1.58 
   0 -19   0    5.50    1.34 
   0  19   0    5.56    1.29 
   0  19   0    2.95    1.52 
   0  19   0    6.93    1.53 
   0  19   0    5.87    1.60 
  -1 -19   0   41.34    3.51 
   1 -19   0   40.00    2.38 
  -1 -19   0   46.59    2.73 
   1 -19   0   42.78    3.08 
  -1 -19   0   44.77    3.33 
   1 -19   0   37.71    3.40 
   1 -19   0   42.17    3.18 
  -1 -19   0   45.01    2.98 
   1 -19   0   37.22    2.23 
   1  19   0   45.48    2.81 
   1  19   0   45.80    3.22 
   1  19   0   47.06    3.06 
  -1  19   0   43.61    3.06 
   1  19   0   37.97    2.83 
  -1  19   0   43.66    3.24 
  -1  19   0   39.52    2.29 
  -1  19   0   44.15    3.09 
   2 -19   0  236.39    9.96 
  -2 -19   0  219.21    9.73 
   2 -19   0  223.04    9.37 
   2 -19   0  225.68    9.86 
  -2 -19   0  215.53    9.71 
   2 -19   0  220.25    9.82 
  -2 -19   0  218.41    9.73 
   2  19   0  226.47    9.65 
  -2  19   0  226.26    9.49 
   2  19   0  215.44    9.62 
  -2  19   0  224.78    9.80 
  -2  19   0  207.76    9.66 
   2  19   0  212.97    9.27 
   2  19   0  213.25    9.65 
   3 -19   0   93.50    4.97 
   3 -19   0   74.68    4.71 
   3 -19   0   78.60    4.92 
  -3 -19   0   80.09    4.64 
  -3 -19   0   73.43    4.65 
  -3 -19   0   81.80    4.58 
  -3  19   0   83.09    4.25 
   3  19   0   80.47    4.49 
  -3  19   0   82.71    4.70 
   3  19   0   71.82    3.89 
  -3  19   0   76.68    4.44 
   3  19   0   89.33    4.81 
   3  19   0   83.11    4.44 
  -4 -19   0   22.20    2.50 
  -4 -19   0   18.90    2.52 
  -4 -19   0   23.33    2.75 
   4 -19   0   20.27    2.59 
   4 -19   0   21.44    2.69 
   4 -19   0   18.57    2.71 
   4  19   0   17.55    2.65 
  -4  19   0   20.82    2.13 
  -4  19   0   19.83    2.52 
   4  19   0   15.71    2.27 
  -4  19   0   16.51    2.26 
   4  19   0   24.61    2.47 
   4  19   0   18.73    1.89 
   5 -19   0  107.05    5.77 
   5 -19   0  103.04    5.95 
  -5 -19   0  108.22    5.88 
   5 -19   0   98.71    6.19 
  -5 -19   0  107.82    6.00 
  -5 -19   0   99.72    5.43 
  -5  19   0   99.03    5.58 
   5  19   0  103.04    5.56 
  -5  19   0  110.04    5.32 
   5  19   0  109.62    6.05 
  -5  19   0   98.88    5.89 
   5  19   0   89.27    4.94 
   5  19   0  105.44    5.51 
  -6 -19   0   58.73    4.75 
  -6 -19   0   60.23    4.92 
   6 -19   0   62.83    4.60 
  -6 -19   0   60.36    4.22 
   6 -19   0   54.51    4.97 
   6 -19   0   63.56    5.48 
   6  19   0   54.95    3.86 
  -6  19   0   58.34    4.39 
  -6  19   0   79.18    5.35 
  -6  19   0   65.39    4.16 
   6  19   0   67.94    4.54 
   6  19   0   62.03    4.44 
   6  19   0   70.12    5.12 
   7 -19   0   26.24    3.80 
  -7 -19   0   25.36    3.59 
   7 -19   0   17.37    3.71 
  -7 -19   0   26.44    3.59 
  -7 -19   0   26.15    3.08 
   7 -19   0   22.84    3.18 
  -7  19   0   19.09    2.92 
  -7  19   0   25.94    3.87 
   7  19   0   25.85    3.33 
   7  19   0   22.06    3.56 
   7  19   0   24.80    3.21 
  -7  19   0   24.43    2.87 
   8 -19   0   23.91    3.36 
   8 -19   0   25.15    4.29 
  -8 -19   0   16.64    3.69 
  -8 -19   0   23.26    3.68 
   8 -19   0   17.17    3.83 
   8  19   0   20.44    3.13 
  -8  19   0   29.34    4.48 
   8  19   0   16.49    3.21 
  -8  19   0   19.77    2.84 
  -8  19   0   17.86    3.11 
   8  19   0   33.69    4.21 
  -9 -19   0   47.87    5.07 
   9 -19   0   34.52    5.17 
  -9 -19   0   51.75    5.29 
   9 -19   0   64.50    6.23 
   9 -19   0   47.88    4.69 
   9  19   0   40.70    4.58 
  -9  19   0   54.53    4.91 
  -9  19   0   46.28    4.47 
  -9  19   0   41.80    5.53 
   9  19   0   42.31    4.29 
  10 -19   0   54.96    6.28 
 -10 -19   0   37.35    5.33 
 -10 -19   0   46.88    5.46 
  10 -19   0   36.37    5.70 
 -10  19   0   50.47    5.24 
 -10  19   0   51.67    4.90 
 -10  19   0   56.07    6.95 
  10  19   0   36.52    4.57 
  10  19   0   37.46    4.60 
 -11 -19   0    9.19    4.60 
  11 -19   0    6.44    5.09 
  11  19   0   10.01    3.73 
   0 -20   0    4.39    1.64 
   0 -20   0    4.29    1.92 
   0 -20   0    2.36    2.02 
   0 -20   0    3.61    1.34 
   0  20   0    3.33    1.24 
   0  20   0    3.77    1.45 
   0  20   0    2.94    1.61 
   0  20   0    4.43    1.61 
   1 -20   0    1.71    1.70 
  -1 -20   0    6.41    1.55 
  -1 -20   0    3.61    1.44 
  -1 -20   0    2.01    2.01 
   1 -20   0    2.99    1.73 
  -1 -20   0    5.90    1.98 
   1 -20   0    1.98    2.01 
   1 -20   0    3.09    1.09 
  -1  20   0    3.88    1.61 
  -1  20   0    4.90    1.05 
   1  20   0    4.27    1.47 
   1  20   0    3.88    1.60 
   1  20   0    3.61    1.65 
   1  20   0    3.15    1.39 
  -1  20   0    2.73    1.62 
  -1  20   0    5.38    1.79 
   2 -20   0    4.76    1.63 
   2 -20   0    2.05    1.87 
   2 -20   0    1.55    2.00 
  -2 -20   0    2.62    1.86 
  -2 -20   0    4.24    2.04 
  -2 -20   0    4.61    1.73 
   2  20   0    0.20    1.51 
   2  20   0    2.99    1.61 
   2  20   0    5.08    1.63 
  -2  20   0   -0.21    1.48 
   2  20   0    4.17    1.38 
  -2  20   0    1.60    1.67 
  -2  20   0    5.35    1.73 
  -3 -20   0   17.29    2.34 
   3 -20   0   15.89    2.56 
  -3 -20   0   14.07    2.37 
   3 -20   0   14.68    2.54 
  -3 -20   0   18.33    2.43 
   3 -20   0   14.47    2.43 
  -3  20   0   13.72    2.26 
   3  20   0   19.74    2.20 
  -3  20   0   11.98    2.06 
  -3  20   0   13.60    2.01 
   3  20   0   12.65    2.23 
   3  20   0   17.72    2.32 
   3  20   0   15.15    1.70 
   4 -20   0    7.33    2.27 
   4 -20   0    3.06    2.22 
  -4 -20   0    1.56    1.97 
  -4 -20   0    4.96    2.21 
   4 -20   0    3.17    1.98 
  -4 -20   0    7.66    2.14 
  -4  20   0    2.55    1.62 
   4  20   0    5.75    1.89 
   4  20   0    7.07    1.52 
   4  20   0    4.99    2.07 
  -4  20   0    5.82    2.09 
   4  20   0    5.77    1.89 
  -4  20   0    7.10    1.80 
  -5 -20   0    2.12    2.19 
   5 -20   0    1.90    2.21 
   5 -20   0   -0.92    2.14 
  -5 -20   0    4.43    2.37 
  -5 -20   0    4.47    2.08 
   5 -20   0    1.32    2.36 
   5  20   0    4.63    2.30 
  -5  20   0    0.86    1.77 
   5  20   0    4.15    1.58 
  -5  20   0   -1.95    1.90 
   5  20   0    4.34    1.88 
  -5  20   0    4.37    1.81 
   5  20   0    3.08    1.94 
   6 -20   0    3.05    2.93 
  -6 -20   0    1.80    2.17 
   6 -20   0    2.66    2.47 
  -6 -20   0    0.90    2.52 
  -6 -20   0    2.89    2.45 
   6 -20   0    4.48    2.48 
  -6  20   0    2.34    2.51 
  -6  20   0    4.45    1.94 
   6  20   0    3.42    2.61 
   6  20   0    5.42    2.34 
   6  20   0    1.79    1.93 
  -6  20   0    2.49    2.01 
   7 -20   0   16.34    3.59 
   7 -20   0   19.73    3.22 
  -7 -20   0   24.18    3.84 
   7 -20   0   14.77    3.82 
  -7 -20   0   15.78    3.26 
  -7 -20   0   24.42    3.10 
  -7  20   0   14.94    2.83 
   7  20   0   17.32    2.82 
   7  20   0   24.91    3.32 
  -7  20   0   23.70    4.16 
  -7  20   0   22.01    3.04 
   7  20   0   22.98    3.74 
   8 -20   0   21.16    4.39 
   8 -20   0   22.01    3.99 
  -8 -20   0   14.50    3.48 
  -8 -20   0   15.36    3.74 
   8 -20   0   19.65    3.34 
   8  20   0   15.69    3.58 
  -8  20   0   23.78    3.19 
   8  20   0   19.06    3.02 
  -8  20   0   22.20    4.07 
  -8  20   0   15.64    3.04 
   8  20   0   18.06    3.33 
   9 -20   0    6.53    2.94 
   9 -20   0    7.13    3.90 
  -9 -20   0   -2.35    3.12 
   9 -20   0    1.70    3.50 
  -9 -20   0   -0.83    3.35 
   9  20   0    0.30    2.43 
  -9  20   0   -0.38    2.76 
  -9  20   0    5.10    4.02 
   9  20   0    0.48    2.62 
  -9  20   0    5.08    2.82 
  10 -20   0    6.79    4.18 
 -10 -20   0    2.80    3.37 
 -10 -20   0    7.68    3.76 
  10 -20   0    3.39    4.17 
  10  20   0   -0.59    2.82 
  10  20   0    2.36    3.16 
 -10  20   0   -1.05    3.40 
 -10  20   0    9.30    4.63 
 -10  20   0    4.97    3.14 
 -11 -20   0    4.73    4.17 
  11  20   0    6.38    3.60 
   0 -21   0    0.06    2.03 
   0 -21   0    0.46    1.27 
   0 -21   0   -1.42    1.77 
   0 -21   0   -0.58    1.51 
   0  21   0    4.26    1.73 
   0  21   0   -0.60    1.14 
   0  21   0   -0.67    1.52 
   0  21   0   -0.38    1.42 
   1 -21   0   15.48    1.49 
   1 -21   0   18.33    2.58 
   1 -21   0   16.01    2.23 
   1 -21   0   15.62    2.24 
  -1 -21   0   14.53    1.95 
  -1 -21   0   16.09    2.50 
  -1 -21   0   15.88    1.88 
  -1 -21   0   18.08    2.41 
  -1  21   0   15.16    1.98 
  -1  21   0   14.12    1.41 
   1  21   0   15.41    1.86 
   1  21   0   14.01    2.10 
  -1  21   0   15.74    2.23 
   1  21   0   16.14    1.91 
   1  21   0   12.08    2.14 
  -1  21   0   18.36    2.21 
  -2 -21   0   42.53    3.61 
   2 -21   0   50.94    3.82 
  -2 -21   0   48.71    3.50 
   2 -21   0   44.76    3.82 
  -2 -21   0   47.04    3.78 
   2 -21   0   46.84    3.25 
  -2  21   0   54.88    3.74 
   2  21   0   44.56    3.29 
   2  21   0   39.31    3.33 
  -2  21   0   42.32    3.46 
   2  21   0   43.67    2.89 
  -2  21   0   48.73    3.38 
   2  21   0   45.52    3.41 
  -3 -21   0   17.15    2.40 
   3 -21   0   19.29    2.67 
  -3 -21   0   15.11    2.47 
  -3 -21   0   13.64    2.48 
   3 -21   0   13.29    2.51 
   3 -21   0   17.58    1.96 
   3 -21   0   10.98    2.31 
   3  21   0   16.61    2.31 
  -3  21   0   11.52    2.15 
  -3  21   0   14.05    2.04 
  -3  21   0   15.37    2.35 
   3  21   0   16.65    2.39 
   3  21   0   15.00    2.18 
   3  21   0   12.78    1.65 
   4 -21   0    3.31    2.39 
  -4 -21   0    9.29    2.24 
  -4 -21   0    6.57    2.20 
  -4 -21   0    5.47    2.30 
   4 -21   0    1.62    2.05 
   4 -21   0    2.13    2.23 
  -4  21   0    3.02    2.11 
   4  21   0    4.47    1.46 
   4  21   0    5.51    1.81 
   4  21   0    8.56    2.28 
  -4  21   0    6.26    2.01 
  -4  21   0    3.60    1.79 
   4  21   0    0.28    1.81 
   5 -21   0   36.14    4.07 
  -5 -21   0   37.42    3.60 
   5 -21   0   31.46    3.37 
   5 -21   0   32.73    3.67 
  -5 -21   0   33.12    3.51 
  -5 -21   0   37.48    3.23 
   5  21   0   35.62    3.22 
   5  21   0   29.31    3.17 
  -5  21   0   29.32    3.12 
  -5  21   0   26.97    3.50 
   5  21   0   35.36    3.61 
   5  21   0   28.85    2.56 
  -5  21   0   38.72    3.04 
  -6 -21   0   36.93    3.55 
  -6 -21   0   33.78    3.87 
   6 -21   0   29.73    4.00 
   6 -21   0   38.74    4.25 
   6 -21   0   42.50    3.79 
  -6 -21   0   43.77    4.09 
  -6  21   0   34.68    4.23 
  -6  21   0   43.53    3.45 
   6  21   0   35.53    3.61 
  -6  21   0   33.07    3.44 
   6  21   0   39.26    3.44 
   6  21   0   42.90    4.34 
  -7 -21   0    9.70    2.68 
  -7 -21   0   13.39    3.33 
  -7 -21   0    6.74    3.10 
   7 -21   0   12.45    3.04 
   7 -21   0   10.31    3.26 
   7 -21   0    9.21    3.68 
  -7  21   0   11.11    2.59 
   7  21   0    9.32    2.79 
   7  21   0   11.90    2.57 
  -7  21   0    7.72    3.26 
   7  21   0    5.56    3.10 
  -7  21   0    7.90    2.56 
   8 -21   0    3.41    2.88 
   8 -21   0    3.80    3.50 
  -8 -21   0   -2.93    2.92 
  -8 -21   0    2.78    3.08 
   8 -21   0   -2.39    3.54 
   8  21   0   -0.95    3.06 
   8  21   0    0.29    2.23 
   8  21   0   -0.46    2.49 
  -8  21   0    2.96    2.54 
  -8  21   0    0.07    3.46 
  -8  21   0    1.69    2.76 
   9 -21   0    4.57    3.20 
  -9 -21   0   10.38    3.73 
   9 -21   0   10.48    4.27 
   9 -21   0   16.63    4.61 
  -9 -21   0   12.84    3.69 
  -9  21   0    3.73    4.21 
   9  21   0    7.97    3.18 
  -9  21   0   11.73    3.16 
   9  21   0    7.23    2.80 
  -9  21   0    9.49    3.18 
  10 -21   0    8.71    4.65 
 -10 -21   0    4.51    3.94 
  10 -21   0   18.93    5.05 
 -10 -21   0    5.26    4.56 
 -10  21   0   16.31    3.72 
  10  21   0   13.35    3.63 
 -10  21   0   12.53    5.07 
  10  21   0   11.95    3.49 
   0 -22   0  181.93    8.62 
   0 -22   0  185.14    8.34 
   0 -22   0  180.16    8.17 
   0 -22   0  175.71    7.95 
   0  22   0  178.90    7.90 
   0  22   0  190.77    8.29 
   0  22   0  191.15    8.28 
   0  22   0  184.49    8.44 
  -1 -22   0   50.51    3.18 
   1 -22   0   50.63    3.58 
   1 -22   0   49.16    3.92 
   1 -22   0   48.46    2.75 
  -1 -22   0   47.86    3.93 
   1 -22   0   45.15    3.64 
  -1 -22   0   50.18    3.32 
  -1 -22   0   48.82    3.74 
  -1  22   0   40.95    3.59 
  -1  22   0   53.18    3.63 
   1  22   0   55.03    3.24 
   1  22   0   50.71    3.48 
   1  22   0   57.13    3.73 
  -1  22   0   49.84    3.48 
   1  22   0   44.10    3.17 
  -1  22   0   48.67    2.68 
  -2 -22   0    2.04    1.69 
   2 -22   0    0.84    1.69 
  -2 -22   0    2.35    2.02 
  -2 -22   0    1.66    2.10 
   2 -22   0    0.99    2.14 
   2 -22   0    0.84    1.97 
  -2  22   0    0.40    1.79 
   2  22   0    3.58    1.73 
   2  22   0    2.46    1.38 
   2  22   0    0.32    1.67 
  -2  22   0    4.12    1.77 
  -2  22   0    1.21    1.73 
   2  22   0    3.94    1.82 
  -3 -22   0   75.48    4.93 
   3 -22   0   83.94    5.01 
   3 -22   0   86.87    4.38 
   3 -22   0   77.01    5.05 
  -3 -22   0   86.39    4.99 
  -3 -22   0   83.81    4.96 
   3 -22   0   84.38    5.29 
  -3  22   0   77.86    4.84 
   3  22   0   85.29    4.80 
   3  22   0   81.61    4.87 
   3  22   0   87.81    4.77 
  -3  22   0   80.03    4.52 
   3  22   0   75.59    4.13 
  -3  22   0   80.07    5.04 
   4 -22   0  106.73    6.04 
  -4 -22   0  104.09    5.90 
  -4 -22   0   93.77    5.86 
   4 -22   0  103.54    6.27 
   4 -22   0  101.41    6.12 
  -4 -22   0  102.58    5.78 
  -4  22   0  107.16    6.11 
   4  22   0   99.03    4.99 
   4  22   0  109.81    5.98 
   4  22   0  108.38    5.81 
  -4  22   0  107.66    5.77 
  -4  22   0  105.91    5.54 
   4  22   0  106.47    5.69 
   5 -22   0   70.99    5.09 
  -5 -22   0   70.75    4.80 
  -5 -22   0   75.11    5.15 
  -5 -22   0   70.81    5.12 
   5 -22   0   75.67    5.65 
   5 -22   0   71.09    5.14 
   5  22   0   71.98    4.19 
  -5  22   0   75.64    5.20 
  -5  22   0   71.56    4.82 
   5  22   0   68.36    4.67 
   5  22   0   80.46    5.22 
  -5  22   0   71.72    4.48 
   5  22   0   72.29    4.84 
  -6 -22   0    3.75    2.68 
   6 -22   0    0.31    2.59 
   6 -22   0    0.18    2.63 
  -6 -22   0    2.96    2.83 
   6 -22   0    3.42    3.09 
  -6 -22   0    1.60    2.38 
   6  22   0    0.17    2.26 
  -6  22   0    3.15    2.32 
  -6  22   0    0.67    2.03 
   6  22   0    0.86    2.02 
   6  22   0    4.93    2.80 
  -6  22   0    5.75    2.78 
  -7 -22   0   65.09    5.36 
  -7 -22   0   65.08    5.72 
   7 -22   0   62.99    5.70 
   7 -22   0   68.22    5.99 
   7 -22   0   64.96    5.21 
  -7 -22   0   60.51    5.04 
  -7  22   0   68.42    4.76 
  -7  22   0   60.66    4.97 
   7  22   0   61.06    4.81 
   7  22   0   68.58    5.83 
  -7  22   0   63.22    5.73 
   7  22   0   57.02    4.92 
   8 -22   0   74.36    6.62 
  -8 -22   0   77.41    6.47 
   8 -22   0   75.20    7.03 
   8 -22   0   82.43    6.10 
  -8 -22   0   81.31    6.75 
   8  22   0   77.36    6.67 
  -8  22   0   89.31    5.40 
   8  22   0   80.75    5.79 
   8  22   0   78.51    5.94 
  -8  22   0   83.38    6.10 
  -8  22   0   88.82    7.62 
   9 -22   0   -0.32    3.62 
   9 -22   0    3.74    4.02 
  -9 -22   0   14.58    3.95 
   9 -22   0   14.09    3.55 
  -9 -22   0    3.25    3.64 
  -9  22   0    5.61    2.99 
  -9  22   0   13.59    3.61 
  -9  22   0    5.60    4.06 
   9  22   0    6.17    2.97 
   9  22   0    5.72    3.01 
  10 -22   0   14.69    5.01 
 -10 -22   0   11.89    4.15 
 -10 -22   0   18.26    4.47 
  10 -22   0   15.19    4.88 
  10  22   0   16.65    3.88 
  10  22   0   16.81    4.11 
 -10  22   0   18.71    5.10 
 -10  22   0   16.72    3.77 
   0 -23   0    1.48    1.96 
   0 -23   0    3.48    1.39 
   0 -23   0    2.02    2.26 
   0 -23   0    0.44    1.74 
   0  23   0   -1.12    1.52 
   0  23   0    1.88    1.68 
   0  23   0    2.09    1.79 
   0  23   0    2.64    1.34 
   1 -23   0   30.36    2.25 
  -1 -23   0   29.97    2.70 
   1 -23   0   35.54    3.07 
   1 -23   0   35.33    2.93 
   1 -23   0   32.18    3.21 
  -1 -23   0   32.87    2.92 
  -1 -23   0   32.15    3.08 
  -1 -23   0   34.12    3.23 
  -1  23   0   30.99    2.93 
  -1  23   0   34.75    2.81 
   1  23   0   34.48    2.76 
   1  23   0   33.06    2.76 
   1  23   0   33.80    2.86 
  -1  23   0   34.20    3.06 
  -1  23   0   30.24    2.12 
   1  23   0   30.44    2.97 
  -2 -23   0   69.07    4.64 
  -2 -23   0   74.44    4.32 
   2 -23   0   68.64    4.12 
  -2 -23   0   61.39    4.41 
   2 -23   0   72.31    4.78 
   2 -23   0   67.31    4.63 
   2  23   0   65.12    3.72 
  -2  23   0   68.87    4.16 
  -2  23   0   70.91    4.46 
   2  23   0   64.50    4.10 
   2  23   0   66.69    4.35 
   2  23   0   68.23    4.26 
  -2  23   0   65.07    4.45 
  -3 -23   0   72.51    4.92 
  -3 -23   0   76.24    4.88 
  -3 -23   0   85.10    5.06 
   3 -23   0   79.95    5.17 
   3 -23   0   84.09    5.24 
   3 -23   0   76.35    4.38 
   3 -23   0   79.91    5.17 
  -3  23   0   89.02    5.25 
   3  23   0   76.76    4.11 
   3  23   0   77.90    4.80 
   3  23   0   86.55    4.86 
  -3  23   0   85.85    4.69 
  -3  23   0   69.85    4.82 
   3  23   0   81.04    4.74 
   4 -23   0    6.23    2.64 
  -4 -23   0   11.67    2.45 
   4 -23   0   11.69    2.75 
  -4 -23   0    9.37    2.52 
   4 -23   0    8.46    2.57 
  -4 -23   0   10.86    2.69 
   4  23   0    8.88    2.13 
   4  23   0    7.77    1.61 
  -4  23   0    8.97    2.17 
  -4  23   0    6.96    2.38 
   4  23   0    9.79    2.34 
  -4  23   0    7.46    2.07 
   4  23   0   11.00    2.51 
  -5 -23   0   53.25    4.49 
   5 -23   0   48.48    4.52 
   5 -23   0   42.84    4.47 
  -5 -23   0   57.04    4.86 
  -5 -23   0   53.42    4.31 
   5 -23   0   55.71    4.76 
   5  23   0   54.90    4.38 
  -5  23   0   54.72    4.83 
  -5  23   0   59.32    4.09 
  -5  23   0   53.35    4.37 
   5  23   0   56.99    4.99 
   5  23   0   59.23    4.36 
   6 -23   0   60.87    5.04 
  -6 -23   0   56.07    4.95 
   6 -23   0   49.65    5.09 
   6 -23   0   54.22    5.00 
  -6 -23   0   59.09    5.06 
  -6 -23   0   59.50    4.51 
   6  23   0   47.51    4.38 
  -6  23   0   59.28    4.78 
  -6  23   0   62.02    5.44 
  -6  23   0   56.72    4.42 
   6  23   0   52.65    4.45 
   6  23   0   62.41    5.16 
   7 -23   0    2.51    3.38 
  -7 -23   0    3.61    3.20 
   7 -23   0    6.22    3.68 
   7 -23   0   13.39    3.19 
  -7 -23   0   11.80    2.96 
  -7 -23   0   12.24    3.40 
  -7  23   0   13.46    3.94 
   7  23   0    9.05    3.21 
   7  23   0    7.85    2.92 
  -7  23   0    8.69    2.64 
  -7  23   0    9.25    2.82 
   7  23   0   12.46    2.88 
   8 -23   0   12.71    3.37 
   8 -23   0   13.98    4.23 
  -8 -23   0   12.39    3.85 
   8 -23   0   11.88    3.80 
  -8 -23   0   16.89    3.86 
   8  23   0    9.83    3.09 
  -8  23   0   12.24    2.98 
   8  23   0   13.19    3.03 
  -8  23   0    5.37    3.88 
  -8  23   0   16.05    3.33 
   8  23   0   10.30    3.68 
  -9 -23   0   28.54    5.53 
   9 -23   0   23.78    4.98 
  -9 -23   0   29.33    4.82 
   9 -23   0   29.21    4.19 
   9 -23   0   19.65    4.82 
  -9  23   0   24.88    5.46 
   9  23   0   26.42    4.04 
  -9  23   0   22.73    3.83 
   9  23   0   26.02    4.17 
  -9  23   0   23.87    4.35 
 -10 -23   0   34.29    6.80 
 -10 -23   0   21.56    5.00 
  10 -23   0   17.31    5.41 
  10  23   0   28.40    4.37 
 -10  23   0   24.12    4.17 
   0 -24   0   16.08    2.78 
   0 -24   0   13.90    1.89 
   0 -24   0   13.19    2.44 
   0 -24   0   16.30    2.30 
   0  24   0   17.77    2.31 
   0  24   0   17.15    2.20 
   0  24   0   18.23    1.88 
   0  24   0   15.49    2.34 
  -1 -24   0    0.90    2.26 
   1 -24   0   -0.94    1.94 
  -1 -24   0    3.12    1.69 
   1 -24   0    0.36    1.15 
  -1 -24   0   -0.93    2.11 
   1 -24   0    1.60    2.22 
  -1 -24   0    1.53    1.56 
   1 -24   0    3.50    1.96 
   1  24   0    2.26    1.80 
  -1  24   0    0.04    1.08 
  -1  24   0    2.75    1.83 
   1  24   0    2.08    1.55 
  -1  24   0    0.35    1.73 
   1  24   0    0.04    1.72 
  -1  24   0    2.36    1.87 
   1  24   0   -3.36    1.47 
  -2 -24   0    1.56    2.10 
  -2 -24   0    1.67    2.31 
  -2 -24   0    2.73    1.83 
   2 -24   0   -1.91    1.81 
   2 -24   0    2.68    2.42 
   2 -24   0    0.56    2.15 
   2  24   0    0.40    1.73 
  -2  24   0    2.05    1.91 
  -2  24   0   -1.09    1.78 
   2  24   0    1.39    1.45 
  -2  24   0   -2.22    1.78 
   2  24   0    2.65    1.86 
   2  24   0    2.92    1.88 
   3 -24   0   -1.16    1.74 
   3 -24   0    4.04    2.31 
  -3 -24   0   -3.63    2.17 
  -3 -24   0    4.54    2.35 
   3 -24   0   -0.86    2.34 
  -3 -24   0   -1.09    2.00 
   3  24   0    0.43    1.81 
   3  24   0   -2.43    1.34 
  -3  24   0    1.95    2.04 
   3  24   0    3.96    2.05 
  -3  24   0   -1.57    1.94 
  -3  24   0   -1.74    2.01 
   3  24   0   -0.20    1.96 
   4 -24   0    0.07    2.31 
  -4 -24   0    2.55    2.45 
  -4 -24   0    0.56    2.17 
  -4 -24   0   -1.10    2.44 
   4 -24   0   -0.01    2.51 
   4 -24   0    1.19    2.59 
   4  24   0    0.14    2.10 
   4  24   0    0.70    2.27 
   4  24   0   -2.22    1.78 
  -4  24   0    0.31    1.97 
   4  24   0   -0.21    1.46 
  -4  24   0    2.64    2.36 
  -4  24   0    1.48    2.05 
   5 -24   0    6.18    3.01 
   5 -24   0    2.40    2.68 
  -5 -24   0    5.81    2.71 
  -5 -24   0    5.50    2.59 
   5 -24   0    6.66    2.92 
  -5 -24   0    2.62    2.67 
  -5  24   0    3.87    2.18 
  -5  24   0    3.69    2.34 
   5  24   0    1.93    2.51 
  -5  24   0    9.71    2.90 
   5  24   0    2.01    2.30 
   5  24   0    2.46    2.18 
  -6 -24   0   -0.50    2.76 
  -6 -24   0   -0.15    2.66 
   6 -24   0    3.81    2.91 
   6 -24   0    0.39    3.03 
   6 -24   0    3.46    2.89 
  -6 -24   0    0.86    2.92 
  -6  24   0    0.30    2.90 
  -6  24   0    0.51    2.24 
   6  24   0    3.18    2.20 
   6  24   0   -2.34    2.31 
  -6  24   0    1.70    2.36 
   6  24   0    0.52    2.69 
   7 -24   0   -1.51    3.35 
  -7 -24   0   -4.92    3.03 
   7 -24   0   -1.09    3.25 
  -7 -24   0    3.07    3.03 
  -7 -24   0    1.96    3.02 
   7 -24   0    1.23    2.98 
   7  24   0    0.88    3.06 
   7  24   0    3.72    2.45 
   7  24   0   -0.82    2.62 
  -7  24   0    2.66    2.35 
  -7  24   0    2.48    3.47 
  -7  24   0    2.29    2.58 
  -8 -24   0    7.32    3.74 
   8 -24   0    0.96    3.47 
  -8 -24   0    4.70    3.41 
   8 -24   0    6.34    4.12 
   8 -24   0    1.33    3.09 
  -8  24   0    6.01    2.78 
  -8  24   0    0.60    3.86 
  -8  24   0   12.13    3.25 
   8  24   0    0.10    2.72 
   8  24   0    7.59    2.95 
  -9 -24   0   -1.73    3.69 
  -9 -24   0    4.30    3.66 
   9 -24   0    0.61    3.90 
   9 -24   0    2.64    3.20 
   9 -24   0   -1.54    4.02 
   9  24   0    1.70    2.84 
  -9  24   0    0.81    2.94 
  -9  24   0   -1.65    4.07 
   9  24   0    3.28    3.03 
 -10 -24   0    2.54    4.22 
  10  24   0   -2.51    2.74 
   0 -25   0    4.06    2.22 
   0 -25   0   -3.83    2.20 
   0 -25   0   -2.37    1.42 
   0 -25   0    1.51    1.82 
   0  25   0   -0.54    1.31 
   0  25   0    3.10    1.91 
   0  25   0    0.16    1.66 
   0  25   0   -0.29    1.90 
  -1 -25   0   74.18    4.38 
   1 -25   0   71.99    4.66 
  -1 -25   0   69.20    4.10 
   1 -25   0   81.33    4.60 
   1 -25   0   68.69    3.69 
   1 -25   0   80.59    5.06 
  -1 -25   0   68.83    4.73 
  -1 -25   0   72.51    4.95 
  -1  25   0   79.30    4.68 
   1  25   0   70.43    4.27 
  -1  25   0   81.49    4.52 
   1  25   0   70.73    4.61 
   1  25   0   75.09    4.47 
  -1  25   0   70.16    4.68 
  -1  25   0   69.46    3.63 
   1  25   0   71.66    4.19 
  -2 -25   0   72.00    4.90 
   2 -25   0   73.44    4.86 
   2 -25   0   75.72    4.50 
  -2 -25   0   73.11    5.00 
  -2 -25   0   74.17    4.54 
   2 -25   0   73.67    5.17 
   2  25   0   72.85    4.76 
   2  25   0   70.49    4.66 
  -2  25   0   72.62    4.51 
  -2  25   0   66.78    4.79 
  -2  25   0   77.22    4.79 
   2  25   0   75.68    4.14 
   2  25   0   80.22    4.63 
  -3 -25   0   11.97    2.49 
   3 -25   0    9.52    2.85 
  -3 -25   0    9.92    2.71 
   3 -25   0   13.33    2.85 
  -3 -25   0    6.88    2.61 
   3 -25   0   10.88    2.10 
   3  25   0    9.83    1.76 
  -3  25   0    6.84    2.31 
   3  25   0    9.30    2.32 
   3  25   0    8.98    2.37 
  -3  25   0    5.74    2.18 
   3  25   0   10.55    2.28 
  -3  25   0    5.68    2.40 
  -4 -25   0    5.14    2.53 
   4 -25   0    0.00    2.57 
   4 -25   0   -0.28    2.57 
  -4 -25   0    5.82    2.66 
   4 -25   0    1.44    2.68 
  -4 -25   0   -3.47    2.22 
   4  25   0    0.29    2.36 
   4  25   0    0.02    2.01 
  -4  25   0    2.77    2.20 
  -4  25   0    3.73    2.51 
  -4  25   0   -0.90    2.06 
   4  25   0    0.35    2.19 
  -5 -25   0   43.29    4.32 
  -5 -25   0   42.86    4.35 
  -5 -25   0   51.08    4.20 
   5 -25   0   44.34    4.50 
   5 -25   0   45.23    4.39 
   5 -25   0   43.51    4.76 
  -5  25   0   50.76    4.00 
   5  25   0   47.18    4.47 
  -5  25   0   44.14    4.43 
   5  25   0   57.48    4.47 
   5  25   0   41.11    3.84 
  -5  25   0   43.30    3.99 
   6 -25   0   57.27    5.47 
  -6 -25   0   49.99    4.46 
  -6 -25   0   42.14    4.65 
  -6 -25   0   44.76    4.76 
   6 -25   0   47.00    4.89 
   6 -25   0   47.91    4.56 
  -6  25   0   49.65    4.09 
  -6  25   0   43.17    4.19 
   6  25   0   37.67    4.06 
   6  25   0   53.25    5.05 
  -6  25   0   45.48    4.80 
   6  25   0   52.17    4.29 
  -7 -25   0   23.68    4.25 
   7 -25   0   15.70    4.52 
   7 -25   0   24.55    3.76 
   7 -25   0   16.82    3.95 
  -7 -25   0   19.20    3.94 
  -7  25   0   20.86    3.30 
  -7  25   0   16.38    3.99 
   7  25   0   16.52    3.14 
   7  25   0   16.54    3.39 
  -7  25   0   14.60    3.29 
   7  25   0   24.07    4.15 
   8 -25   0    8.26    4.08 
   8 -25   0    1.02    3.45 
   8 -25   0    5.30    3.45 
  -8 -25   0    3.90    3.72 
  -8 -25   0    8.74    3.69 
   8  25   0    6.42    2.83 
  -8  25   0    5.48    3.81 
  -8  25   0    7.24    3.10 
  -8  25   0    8.76    3.25 
   8  25   0    6.16    3.13 
   9 -25   0   26.19    5.16 
  -9 -25   0   34.05    5.12 
   9 -25   0   23.15    5.30 
  -9 -25   0   39.17    5.57 
   9 -25   0   38.41    4.81 
  -9  25   0   44.86    4.81 
   9  25   0   33.85    4.37 
   9  25   0   36.12    4.38 
  -9  25   0   37.73    5.89 
  10  25   0   31.05    4.56 
   0 -26   0  229.09   10.03 
   0 -26   0  216.15    9.75 
   0 -26   0  227.87   10.19 
   0 -26   0  226.62   10.53 
   0  26   0  220.72    9.70 
   0  26   0  227.24   10.08 
   0  26   0  212.58   10.27 
   0  26   0  243.84   10.10 
  -1 -26   0   32.28    3.35 
  -1 -26   0   39.71    3.64 
  -1 -26   0   34.99    2.99 
   1 -26   0   36.35    3.61 
  -1 -26   0   29.00    2.87 
   1 -26   0   35.28    3.28 
   1 -26   0   33.81    3.15 
   1 -26   0   31.35    2.39 
   1  26   0   33.88    3.02 
  -1  26   0   29.40    2.57 
  -1  26   0   38.15    3.32 
  -1  26   0   35.04    3.07 
   1  26   0   28.12    2.94 
   1  26   0   24.47    3.06 
   1  26   0   32.90    2.86 
  -1  26   0   30.91    3.13 
  -2 -26   0   -0.10    1.93 
   2 -26   0   -0.21    2.29 
   2 -26   0    3.46    2.09 
  -2 -26   0    2.38    2.46 
  -2 -26   0   -0.42    2.45 
   2 -26   0    5.07    2.71 
  -2  26   0    5.26    2.08 
  -2  26   0    1.55    2.05 
   2  26   0    2.35    2.05 
   2  26   0    1.70    1.63 
   2  26   0    1.73    2.01 
   2  26   0    0.42    1.82 
  -2  26   0    2.41    2.25 
   3 -26   0   72.66    5.29 
  -3 -26   0   77.89    5.22 
   3 -26   0   77.69    4.54 
   3 -26   0   74.77    5.40 
  -3 -26   0   74.78    5.24 
  -3 -26   0   80.22    5.10 
   3  26   0   71.15    4.97 
   3  26   0   77.73    5.15 
   3  26   0   82.92    5.02 
  -3  26   0   73.64    5.10 
  -3  26   0   74.98    5.33 
  -3  26   0   81.17    4.89 
   3  26   0   76.06    4.22 
  -4 -26   0  209.61   10.19 
  -4 -26   0  206.24    9.91 
   4 -26   0  205.59   10.17 
  -4 -26   0  225.00   10.29 
   4 -26   0  218.11   10.41 
   4 -26   0  199.74   10.33 
  -4  26   0  219.11   10.40 
   4  26   0  199.43    9.81 
  -4  26   0  211.59    9.68 
   4  26   0  212.05    9.90 
  -4  26   0  183.57    9.92 
   4  26   0  217.53   10.22 
  -5 -26   0   91.39    5.99 
  -5 -26   0  101.74    6.48 
   5 -26   0   96.65    6.75 
   5 -26   0   90.69    6.60 
  -5 -26   0   89.01    6.27 
   5 -26   0   92.01    6.32 
  -5  26   0   87.35    5.59 
   5  26   0   95.10    5.94 
  -5  26   0   88.52    5.98 
   5  26   0   92.25    6.33 
  -5  26   0   92.81    6.39 
   5  26   0   95.86    5.72 
  -6 -26   0    5.96    3.32 
   6 -26   0   10.22    3.40 
   6 -26   0    7.72    3.50 
  -6 -26   0    5.00    3.20 
   6 -26   0    7.68    3.25 
  -6 -26   0   11.46    3.34 
   6  26   0   10.14    2.91 
  -6  26   0   11.77    3.00 
   6  26   0    5.07    3.01 
  -6  26   0    7.45    3.39 
   6  26   0    6.16    2.47 
  -6  26   0    8.87    2.74 
   7 -26   0   51.34    5.49 
  -7 -26   0   48.56    5.15 
   7 -26   0   42.32    5.45 
  -7 -26   0   56.84    5.67 
   7 -26   0   46.11    4.80 
   7  26   0   50.31    4.74 
  -7  26   0   49.31    4.77 
   7  26   0   56.89    5.31 
  -7  26   0   41.26    4.27 
   7  26   0   43.24    4.31 
  -7  26   0   43.68    5.69 
  -8 -26   0   69.48    5.99 
   8 -26   0   62.02    6.29 
  -8 -26   0   52.60    5.91 
   8 -26   0   59.41    5.39 
   8 -26   0   48.46    6.31 
   8  26   0   68.26    5.57 
  -8  26   0   51.22    5.25 
  -8  26   0   47.20    5.10 
   8  26   0   62.37    5.36 
  -8  26   0   58.44    6.41 
   9 -26   0    9.02    3.73 
  -9 -26   0    7.97    4.60 
   9 -26   0    5.05    4.26 
   9 -26   0    7.56    4.74 
  -9 -26   0    7.89    4.12 
  -9  26   0   10.35    3.53 
  -9  26   0    6.36    4.39 
   9  26   0   12.92    3.44 
   9  26   0    1.96    3.22 
  10  26   0    8.97    4.24 
   0 -27   0    0.65    2.62 
   0 -27   0    1.07    2.33 
   0 -27   0    4.09    1.68 
   0 -27   0    0.63    2.03 
   0  27   0    2.11    1.85 
   0  27   0    3.71    1.57 
   0  27   0    5.94    2.22 
   0  27   0    4.49    2.17 
  -1 -27   0   36.37    3.11 
   1 -27   0   35.60    3.40 
  -1 -27   0   37.42    2.98 
  -1 -27   0   34.17    3.61 
   1 -27   0   33.79    3.69 
  -1 -27   0   31.03    3.42 
   1 -27   0   32.77    3.26 
   1  27   0   34.40    3.03 
   1  27   0   32.88    3.35 
  -1  27   0   30.79    3.12 
  -1  27   0   28.67    3.26 
  -1  27   0   33.86    3.15 
   1  27   0   36.53    3.09 
   1  27   0   28.78    3.04 
   2 -27   0   46.81    3.87 
  -2 -27   0   51.29    4.20 
   2 -27   0   50.51    4.35 
  -2 -27   0   50.73    4.17 
   2 -27   0   51.95    4.40 
  -2 -27   0   47.66    3.91 
  -2  27   0   45.16    4.03 
   2  27   0   44.25    3.94 
   2  27   0   49.39    3.96 
   2  27   0   48.30    3.35 
  -2  27   0   51.26    4.11 
   2  27   0   41.48    3.75 
  -2  27   0   43.38    3.61 
   3 -27   0   30.82    3.83 
   3 -27   0   34.06    3.02 
   3 -27   0   36.00    3.81 
  -3 -27   0   35.01    3.62 
  -3 -27   0   29.62    3.63 
  -3 -27   0   33.51    3.54 
  -3  27   0   26.72    3.43 
   3  27   0   33.27    3.44 
   3  27   0   38.28    3.59 
   3  27   0   32.53    3.13 
  -3  27   0   36.25    3.37 
   3  27   0   31.88    3.37 
  -3  27   0   31.20    3.65 
   4 -27   0    4.24    2.98 
  -4 -27   0   -1.42    2.68 
  -4 -27   0    3.25    2.57 
  -4 -27   0    5.70    2.73 
   4 -27   0    5.82    3.02 
  -4  27   0   -1.62    2.33 
  -4  27   0    2.43    2.73 
   4  27   0    3.14    2.23 
  -4  27   0    4.37    2.41 
   4  27   0    3.12    2.48 
   4  27   0    4.77    2.60 
   5 -27   0   48.40    4.86 
   5 -27   0   53.62    4.89 
  -5 -27   0   44.11    4.69 
  -5 -27   0   53.53    4.60 
  -5 -27   0   62.71    5.33 
   5 -27   0   57.74    5.31 
  -5  27   0   44.60    4.11 
   5  27   0   54.31    4.97 
   5  27   0   58.86    4.61 
  -5  27   0   49.80    4.97 
   5  27   0   56.19    4.62 
  -5  27   0   49.36    4.51 
   6 -27   0   33.68    4.69 
   6 -27   0   30.91    4.45 
  -6 -27   0   33.76    4.39 
  -6 -27   0   26.00    4.28 
  -6 -27   0   33.48    4.17 
   6 -27   0   34.68    4.30 
   6  27   0   33.46    4.13 
   6  27   0   26.27    3.42 
  -6  27   0   32.80    3.94 
   6  27   0   33.11    3.89 
  -6  27   0   32.54    4.42 
  -6  27   0   33.21    3.93 
   7 -27   0    3.52    3.65 
   7 -27   0    7.23    3.36 
  -7 -27   0    6.36    3.56 
   7 -27   0    6.93    3.89 
  -7 -27   0    8.57    3.92 
  -7  27   0    7.41    4.02 
  -7  27   0    1.38    2.84 
  -7  27   0    5.82    3.44 
   7  27   0   11.32    3.64 
   7  27   0    6.66    3.05 
   7  27   0    4.30    2.76 
   8 -27   0    3.61    3.42 
  -8 -27   0    4.01    4.02 
   8 -27   0    9.58    4.36 
   8 -27   0    6.08    4.23 
  -8 -27   0    3.92    3.91 
  -8  27   0    2.39    3.29 
   8  27   0    0.76    3.24 
   8  27   0    1.41    2.80 
  -8  27   0    3.66    4.20 
  -9 -27   0   16.25    4.34 
   9 -27   0   23.53    5.45 
   9 -27   0   21.12    5.09 
   9 -27   0   21.16    4.31 
  -9 -27   0   13.12    4.96 
  -9  27   0    8.63    4.57 
   9  27   0   19.24    3.97 
  -9  27   0   16.55    4.06 
   9  27   0   23.49    3.93 
   0 -28   0    2.81    2.44 
   0 -28   0   -1.60    1.59 
   0 -28   0   -1.06    2.63 
   0 -28   0    0.53    2.08 
   0  28   0    0.79    2.15 
   0  28   0    1.45    2.09 
   0  28   0    1.63    1.99 
   0  28   0    0.39    1.55 
   1 -28   0    5.15    2.38 
   1 -28   0    3.48    2.64 
  -1 -28   0    4.20    2.82 
  -1 -28   0    4.55    2.59 
  -1 -28   0    8.31    2.03 
   1 -28   0    5.25    2.49 
  -1 -28   0    2.78    1.93 
   1  28   0    4.63    2.15 
   1  28   0    3.87    1.95 
  -1  28   0    5.41    2.25 
   1  28   0    5.29    2.00 
  -1  28   0    5.01    2.35 
   1  28   0    4.20    2.36 
  -1  28   0    3.57    2.18 
  -2 -28   0    7.99    2.30 
  -2 -28   0    9.17    2.91 
   2 -28   0    8.31    3.04 
   2 -28   0    8.30    2.41 
  -2 -28   0    7.97    2.88 
   2 -28   0    8.52    2.72 
  -2  28   0    8.44    2.47 
   2  28   0    8.13    2.59 
  -2  28   0    4.37    2.46 
   2  28   0    8.65    2.00 
   2  28   0    6.56    2.30 
  -2  28   0    7.17    2.41 
   2  28   0    6.92    2.28 
  -3 -28   0    3.13    2.77 
   3 -28   0    3.68    3.00 
  -3 -28   0   -1.60    2.19 
   3 -28   0   -0.48    2.62 
  -3 -28   0    2.06    2.80 
   3 -28   0    5.91    2.20 
   3  28   0    3.62    2.31 
  -3  28   0   -0.86    2.29 
  -3  28   0    0.69    2.53 
   3  28   0    2.75    2.33 
   3  28   0    1.79    2.33 
  -3  28   0    2.12    2.21 
  -4 -28   0    4.55    3.02 
  -4 -28   0   10.70    2.96 
   4 -28   0   15.73    3.57 
   4 -28   0    9.72    3.35 
  -4 -28   0   15.50    3.20 
   4  28   0   16.35    3.15 
  -4  28   0   10.14    2.92 
  -4  28   0   13.59    3.26 
  -4  28   0    6.42    2.80 
   4  28   0   16.77    2.80 
   4  28   0   10.15    2.87 
   5 -28   0    1.70    3.19 
  -5 -28   0    3.62    2.95 
  -5 -28   0    5.45    3.01 
  -5 -28   0   -3.10    3.03 
   5 -28   0    6.38    3.57 
   5 -28   0   -0.87    3.14 
   5  28   0    3.59    2.69 
   5  28   0    3.62    2.89 
   5  28   0    7.73    2.65 
  -5  28   0    0.82    2.63 
  -5  28   0    3.47    3.29 
  -5  28   0    6.85    2.92 
   6 -28   0    2.40    3.40 
  -6 -28   0    6.24    3.47 
   6 -28   0    1.67    3.29 
  -6 -28   0    4.66    3.17 
  -6 -28   0    1.84    3.09 
   6 -28   0   -2.86    3.32 
   6  28   0   -4.51    2.66 
  -6  28   0    3.71    2.74 
   6  28   0    1.85    2.73 
   6  28   0    0.98    2.41 
  -6  28   0    0.57    2.66 
  -6  28   0    0.73    3.51 
   7 -28   0    4.40    3.40 
  -7 -28   0    9.85    3.68 
   7 -28   0    4.38    4.05 
  -7 -28   0   -0.79    3.60 
   7 -28   0    2.03    3.59 
  -7  28   0    5.00    3.09 
   7  28   0    2.50    3.06 
  -7  28   0    2.53    3.00 
  -7  28   0    3.79    3.92 
   7  28   0    5.17    3.45 
   7  28   0    1.81    2.62 
   8 -28   0    1.90    3.51 
  -8 -28   0    5.70    3.78 
   8 -28   0    8.17    4.44 
   8 -28   0    0.00    3.83 
  -8 -28   0   -0.17    3.99 
  -8  28   0    1.66    4.47 
  -8  28   0    2.07    3.37 
   8  28   0    2.34    3.21 
   8  28   0    5.65    3.05 
  -9 -28   0   -4.70    4.38 
   9 -28   0    3.58    3.73 
  -9 -28   0   -2.34    4.02 
   9  28   0    6.08    3.13 
   0 -29   0   -1.39    2.48 
   0 -29   0    1.14    2.34 
   0 -29   0    0.44    2.12 
   0 -29   0   -1.76    2.67 
   0  29   0    0.06    1.94 
   0  29   0    0.32    2.19 
   0  29   0    0.27    2.32 
   1 -29   0   90.27    5.29 
  -1 -29   0   79.12    5.77 
   1 -29   0   79.31    5.77 
  -1 -29   0   78.41    4.82 
   1 -29   0   82.53    5.34 
  -1 -29   0   85.34    4.83 
  -1 -29   0   79.87    5.50 
   1  29   0   88.23    5.00 
   1  29   0   84.17    5.17 
   1  29   0   86.42    4.95 
   1  29   0   84.29    5.38 
  -1  29   0   72.68    5.38 
  -1  29   0   84.78    5.31 
  -1  29   0   91.62    5.25 
   2 -29   0   79.24    4.94 
  -2 -29   0   83.03    5.13 
   2 -29   0   77.80    5.34 
  -2 -29   0   69.85    5.45 
  -2 -29   0   69.00    5.39 
   2 -29   0   73.58    5.70 
  -2  29   0   71.39    5.06 
   2  29   0   79.17    4.97 
   2  29   0   66.67    4.90 
   2  29   0   75.63    4.39 
   2  29   0   78.13    5.23 
  -2  29   0   66.80    5.20 
  -2  29   0   72.66    4.89 
   3 -29   0   14.26    3.18 
  -3 -29   0   10.24    3.19 
  -3 -29   0   15.38    3.16 
   3 -29   0   15.42    3.39 
  -3 -29   0   14.96    2.98 
   3 -29   0    8.79    2.43 
  -3  29   0    9.84    2.95 
  -3  29   0   13.21    2.75 
   3  29   0   12.91    2.77 
   3  29   0   15.13    2.89 
  -3  29   0   19.78    3.26 
   3  29   0   14.52    2.89 
   4 -29   0    2.28    3.25 
  -4 -29   0    0.36    2.69 
  -4 -29   0    3.11    2.95 
   4 -29   0    4.54    3.17 
  -4 -29   0    1.18    2.95 
   4  29   0    1.52    2.38 
   4  29   0    1.18    2.58 
   4  29   0   -0.16    2.54 
  -4  29   0    1.84    2.52 
  -4  29   0   -0.55    3.07 
  -4  29   0    2.11    2.50 
   5 -29   0   40.28    4.49 
  -5 -29   0   34.71    4.03 
   5 -29   0   36.56    4.89 
  -5 -29   0   42.71    4.45 
  -5 -29   0   40.87    4.74 
  -5  29   0   41.49    4.39 
   5  29   0   35.57    3.82 
  -5  29   0   39.04    3.97 
  -5  29   0   34.78    4.45 
   5  29   0   35.33    4.13 
   5  29   0   36.66    3.96 
  -6 -29   0   44.74    5.30 
  -6 -29   0   55.71    5.11 
  -6 -29   0   47.65    4.84 
   6 -29   0   44.54    5.33 
   6 -29   0   38.95    5.09 
   6 -29   0   49.64    5.15 
  -6  29   0   44.12    4.56 
  -6  29   0   41.81    4.58 
  -6  29   0   40.82    5.24 
   6  29   0   35.73    4.35 
   6  29   0   50.36    5.15 
   6  29   0   49.23    4.32 
   7 -29   0   22.12    4.14 
   7 -29   0   16.50    4.34 
  -7 -29   0   15.53    4.57 
  -7 -29   0   18.62    4.17 
   7 -29   0   26.54    4.85 
  -7  29   0   16.16    3.64 
  -7  29   0   20.42    4.46 
   7  29   0   17.44    3.36 
   7  29   0   23.74    3.95 
   8 -29   0    7.05    3.70 
  -8 -29   0    4.97    4.10 
  -8 -29   0    2.73    4.26 
   8 -29   0   10.46    4.70 
   8 -29   0    8.63    4.68 
  -8  29   0    2.17    3.44 
   8  29   0    8.32    3.24 
  -8  29   0    3.54    4.66 
   8  29   0    1.95    3.31 
   9 -29   0   52.84    5.49 
   9  29   0   49.26    5.23 
   0 -30   0  157.28    8.43 
   0 -30   0  168.17    7.82 
   0 -30   0  157.66    8.06 
   0  30   0  152.21    8.13 
   0  30   0  159.03    7.91 
   0  30   0  161.37    7.84 
  -1 -30   0   52.61    4.76 
   1 -30   0   61.62    4.63 
  -1 -30   0   54.26    4.02 
  -1 -30   0   56.39    4.81 
   1 -30   0   55.96    4.80 
  -1 -30   0   57.36    4.08 
   1 -30   0   57.47    4.69 
  -1  30   0   68.26    4.57 
   1  30   0   56.26    3.99 
   1  30   0   55.35    4.14 
  -1  30   0   58.64    4.38 
   1  30   0   58.89    4.64 
  -1  30   0   57.10    4.75 
   1  30   0   56.42    4.39 
   2 -30   0    2.38    2.43 
  -2 -30   0    2.17    2.20 
   2 -30   0   -0.25    2.94 
  -2 -30   0    3.66    2.76 
  -2 -30   0    1.01    2.79 
   2 -30   0    2.08    2.60 
   2  30   0   -1.12    2.10 
   2  30   0   -0.95    2.29 
   2  30   0   -0.87    2.25 
  -2  30   0   -1.14    2.41 
  -2  30   0    0.98    2.44 
  -2  30   0   -3.74    2.25 
   3 -30   0   38.02    3.41 
  -3 -30   0   49.56    4.25 
   3 -30   0   35.30    4.39 
   3 -30   0   42.87    4.45 
  -3 -30   0   40.13    4.17 
  -3 -30   0   41.19    4.41 
  -3  30   0   38.35    3.64 
  -3  30   0   32.51    3.97 
   3  30   0   46.55    4.16 
   3  30   0   33.83    3.82 
   3  30   0   48.14    4.01 
  -3  30   0   44.78    4.23 
  -4 -30   0  108.46    6.99 
   4 -30   0  104.33    7.11 
  -4 -30   0  113.68    7.15 
   4 -30   0  117.85    7.33 
  -4 -30   0  105.58    6.81 
   4  30   0  110.48    6.51 
  -4  30   0  106.11    6.50 
   4  30   0  103.84    6.56 
  -4  30   0  116.90    7.23 
   4  30   0  127.94    7.10 
  -4  30   0  104.95    6.85 
  -5 -30   0   26.92    4.12 
   5 -30   0   34.75    4.52 
  -5 -30   0   25.79    4.09 
  -5 -30   0   30.59    4.20 
   5 -30   0   33.73    4.66 
   5  30   0   30.13    3.53 
   5  30   0   31.22    4.09 
  -5  30   0   28.04    3.72 
  -5  30   0   22.06    3.66 
  -5  30   0   31.74    4.58 
   5  30   0   28.19    3.77 
  -6 -30   0   29.13    3.99 
  -6 -30   0   17.11    4.14 
  -6 -30   0   22.07    4.02 
   6 -30   0   20.23    4.47 
   6 -30   0   18.27    4.63 
   6 -30   0   21.11    4.06 
  -6  30   0   22.51    4.23 
   6  30   0   17.58    3.95 
  -6  30   0   20.27    3.88 
  -6  30   0   16.47    3.71 
   6  30   0   15.29    3.55 
   6  30   0   18.73    3.34 
   7 -30   0   59.12    6.10 
   7 -30   0   53.66    5.63 
  -7 -30   0   63.81    6.35 
  -7 -30   0   54.54    5.69 
   7 -30   0   63.29    7.01 
   7  30   0   51.63    5.17 
   7  30   0   62.37    5.21 
  -7  30   0   44.38    5.13 
  -7  30   0   60.84    6.70 
  -8 -30   0   34.09    5.25 
   8 -30   0   44.57    5.82 
   8 -30   0   28.71    5.93 
  -8 -30   0   33.84    5.70 
   8 -30   0   44.89    5.23 
  -8  30   0   38.16    4.92 
   8  30   0   23.15    4.36 
  -8  30   0   34.95    5.88 
   8  30   0   35.66    4.41 
   9 -30   0   12.48    4.18 
   9  30   0   -0.79    3.51 
   0 -31   0    3.30    2.80 
   0 -31   0    0.68    2.91 
   0 -31   0    1.87    2.36 
   0  31   0    1.39    2.28 
   0  31   0    3.34    2.40 
   0  31   0    4.47    2.30 
   1 -31   0   15.59    2.98 
   1 -31   0    7.90    3.25 
  -1 -31   0    4.48    3.09 
  -1 -31   0   11.77    2.56 
  -1 -31   0    8.51    3.12 
   1 -31   0   12.42    2.89 
  -1  31   0    8.81    2.86 
   1  31   0    9.78    2.44 
  -1  31   0   10.86    2.60 
  -1  31   0    7.54    2.53 
   1  31   0    8.13    2.58 
   1  31   0   12.03    2.74 
   2 -31   0   11.03    3.48 
  -2 -31   0   14.33    2.82 
   2 -31   0   19.61    3.07 
   2 -31   0   18.32    3.30 
  -2 -31   0   15.22    3.35 
  -2 -31   0   20.13    3.49 
  -2  31   0   17.56    2.89 
  -2  31   0   20.55    3.24 
   2  31   0   18.03    2.88 
   2  31   0   14.55    2.89 
   2  31   0   16.73    3.08 
  -2  31   0   14.37    3.07 
   3 -31   0    1.82    2.26 
  -3 -31   0    2.97    2.55 
  -3 -31   0   -0.23    3.04 
  -3 -31   0    3.24    2.99 
   3 -31   0    4.63    3.28 
   3 -31   0   -2.98    2.76 
  -3  31   0   -0.61    2.48 
   3  31   0    2.81    2.55 
   3  31   0   -2.44    2.39 
  -3  31   0   -2.32    2.48 
   3  31   0    6.17    2.61 
  -3  31   0    1.00    2.52 
  -4 -31   0    5.04    2.92 
   4 -31   0    2.31    3.23 
  -4 -31   0    0.71    3.01 
   4 -31   0    1.11    3.38 
  -4 -31   0   -2.76    3.25 
   4  31   0    1.41    2.68 
  -4  31   0    0.26    3.01 
  -4  31   0   -2.73    2.64 
   4  31   0    3.39    2.80 
  -4  31   0    1.40    2.78 
   4  31   0    3.71    2.61 
  -5 -31   0   13.72    3.56 
   5 -31   0    9.20    3.85 
  -5 -31   0    9.02    3.61 
  -5 -31   0   12.62    3.61 
   5 -31   0   15.27    4.10 
   5  31   0   12.57    3.27 
   5  31   0   20.08    3.75 
   5  31   0   13.85    3.15 
  -5  31   0   11.95    3.30 
  -5  31   0   12.08    4.04 
  -5  31   0   14.17    3.50 
  -6 -31   0   13.37    3.76 
  -6 -31   0   12.07    3.91 
   6 -31   0    9.73    4.20 
   6 -31   0    5.33    3.74 
  -6 -31   0   15.38    3.78 
   6  31   0    9.30    3.13 
  -6  31   0    4.97    3.24 
  -6  31   0   10.68    4.67 
  -6  31   0    7.37    3.41 
   6  31   0    6.26    3.25 
   6  31   0    8.65    3.59 
   7 -31   0   -1.11    4.13 
   7 -31   0    4.42    3.84 
  -7 -31   0    2.18    4.17 
  -7 -31   0    2.78    3.64 
   7 -31   0    4.09    4.05 
  -7  31   0   -0.95    3.39 
   7  31   0    5.14    2.96 
   7  31   0   -4.04    3.08 
  -7  31   0    8.86    4.66 
  -8 -31   0   -2.90    4.43 
   8 -31   0    1.80    3.94 
   8 -31   0    0.98    4.53 
   8 -31   0    3.01    4.58 
  -8 -31   0   -5.63    3.49 
   8  31   0    0.89    3.35 
   8  31   0    4.07    3.08 
  -8  31   0   -1.29    4.41 
  -8  31   0    4.45    3.77 
   9 -31   0    1.59    4.22 
   0 -32   0   20.18    3.39 
   0 -32   0   15.71    3.47 
   0 -32   0   18.41    2.93 
   0  32   0   14.65    2.81 
   0  32   0   16.32    2.86 
   0  32   0   22.14    3.41 
   1 -32   0   -2.30    2.53 
   1 -32   0    5.62    2.82 
  -1 -32   0    5.22    3.03 
  -1 -32   0    4.39    3.11 
   1 -32   0    6.77    3.15 
   1  32   0   -1.91    2.75 
  -1  32   0    3.80    2.67 
  -1  32   0    3.85    2.51 
  -1  32   0    2.98    2.42 
   1  32   0    4.17    2.47 
   1  32   0   -0.88    2.42 
  -2 -32   0   -0.81    2.94 
  -2 -32   0    4.05    2.46 
   2 -32   0    1.44    2.61 
   2 -32   0   -0.38    2.67 
  -2 -32   0    5.72    3.08 
   2 -32   0    3.28    3.21 
  -2  32   0   -0.55    2.52 
   2  32   0    3.09    2.51 
  -2  32   0    2.71    2.58 
  -2  32   0    1.44    2.58 
   2  32   0    0.00    2.23 
   2  32   0    0.82    2.46 
   3 -32   0   19.34    3.92 
  -3 -32   0   14.05    3.65 
   3 -32   0   23.06    3.95 
  -3 -32   0   22.28    3.36 
  -3 -32   0   13.13    3.40 
   3 -32   0   16.80    3.87 
   3  32   0   16.40    3.21 
   3  32   0   16.46    3.18 
  -3  32   0   12.36    3.37 
  -3  32   0   14.80    3.43 
   3  32   0   18.91    3.19 
  -3  32   0   17.52    3.17 
  -4 -32   0   17.34    3.98 
   4 -32   0   21.13    4.09 
  -4 -32   0   21.50    3.62 
  -4 -32   0   26.90    3.84 
   4 -32   0   20.29    3.99 
  -4  32   0   17.08    3.67 
   4  32   0   23.21    3.50 
  -4  32   0   17.48    3.19 
   4  32   0   24.54    3.81 
   4  32   0   25.31    3.55 
  -4  32   0   18.66    3.71 
   5 -32   0    1.92    3.61 
  -5 -32   0    2.45    3.24 
   5 -32   0    5.98    3.75 
  -5 -32   0    5.34    3.80 
  -5 -32   0    0.89    3.10 
  -5  32   0   -0.46    3.31 
   5  32   0    4.41    2.81 
  -5  32   0    5.38    3.08 
   5  32   0   -1.37    2.87 
  -5  32   0   -0.78    3.10 
   5  32   0   -1.69    2.68 
   6 -32   0   -1.13    3.84 
  -6 -32   0    0.80    3.98 
  -6 -32   0    4.12    3.38 
  -6 -32   0    4.07    3.37 
   6 -32   0   -0.60    3.58 
  -6  32   0   -5.12    3.56 
  -6  32   0    1.31    3.04 
   6  32   0    6.33    3.01 
   6  32   0    1.47    3.05 
  -7 -32   0   19.33    5.05 
   7 -32   0   16.44    4.42 
  -7 -32   0   13.27    4.12 
   7 -32   0   11.58    4.45 
  -7  32   0   12.49    4.65 
  -7  32   0   15.77    3.96 
   7  32   0   12.15    3.78 
   7  32   0   20.93    3.83 
   8 -32   0    6.63    4.02 
  -8 -32   0    5.94    4.16 
   8 -32   0   16.56    6.49 
  -8  32   0   13.11    6.27 
   8  32   0    8.43    3.48 
   9 -32   0    6.86    5.51 
   0 -33   0    2.53    2.91 
   0 -33   0    3.58    3.10 
   0 -33   0    3.51    2.54 
   0  33   0    2.11    2.42 
   0  33   0    2.47    2.34 
   0  33   0   -0.53    2.64 
   1 -33   0   68.28    5.85 
   1 -33   0   68.42    5.24 
  -1 -33   0   69.67    5.47 
   1 -33   0   73.89    5.31 
  -1 -33   0   68.01    5.74 
  -1  33   0   63.46    5.15 
  -1  33   0   62.04    5.21 
   1  33   0   71.11    5.03 
   1  33   0   66.83    5.28 
  -1  33   0   79.00    5.26 
   2 -33   0   96.20    6.04 
  -2 -33   0   91.22    6.12 
  -2 -33   0   91.90    6.38 
   2 -33   0  100.04    6.61 
   2 -33   0  108.81    6.94 
  -2 -33   0   97.24    6.69 
   2  33   0   92.33    5.97 
  -2  33   0  109.21    6.38 
   2  33   0   98.88    6.27 
  -2  33   0   98.65    5.94 
  -2  33   0   93.84    6.42 
  -3 -33   0   30.92    4.06 
  -3 -33   0   31.37    3.85 
   3 -33   0   30.80    4.41 
   3 -33   0   23.83    4.07 
  -3 -33   0   28.89    4.14 
  -3  33   0   33.64    4.22 
  -3  33   0   23.07    3.88 
   3  33   0   33.45    3.93 
  -3  33   0   30.20    3.66 
   3  33   0   28.76    3.59 
   3  33   0   33.76    3.67 
  -4 -33   0    6.32    3.71 
  -4 -33   0    8.54    3.22 
   4 -33   0   10.35    3.75 
   4 -33   0    8.70    3.81 
  -4 -33   0    6.57    3.10 
  -4  33   0    8.41    3.68 
   4  33   0    5.31    2.81 
  -4  33   0    3.71    2.93 
   4  33   0    6.68    3.07 
   4  33   0    4.82    2.93 
  -4  33   0    0.68    2.96 
  -5 -33   0   52.73    5.90 
   5 -33   0   47.49    5.34 
   5 -33   0   55.30    5.67 
  -5 -33   0   53.90    5.19 
  -5 -33   0   49.70    4.89 
  -5  33   0   46.23    5.48 
   5  33   0   50.69    5.17 
   5  33   0   46.67    4.66 
  -5  33   0   44.58    4.76 
   5  33   0   35.59    4.38 
  -5  33   0   46.26    4.89 
   6 -33   0   74.43    6.76 
   6 -33   0   71.47    6.16 
  -6 -33   0   73.56    6.27 
  -6 -33   0   58.38    6.37 
  -6 -33   0   60.57    6.01 
   6  33   0   62.06    5.34 
   6  33   0   65.55    5.44 
  -6  33   0   45.47    5.29 
  -6  33   0   58.75    6.49 
  -7 -33   0   16.62    5.17 
   7 -33   0    8.41    4.49 
  -7 -33   0   11.14    4.30 
   7 -33   0   16.44    4.38 
   7  33   0   18.10    3.67 
   7  33   0   12.27    3.79 
  -7  33   0    8.18    4.06 
  -7  33   0   11.83    4.85 
  -8 -33   0    1.78    4.94 
   8 -33   0   15.59    4.53 
   8  33   0    7.64    3.42 
   0 -34   0   71.42    5.48 
   0 -34   0   69.48    5.82 
   0  34   0   68.52    5.43 
   0  34   0   73.91    5.74 
   0  34   0   68.68    4.99 
   1 -34   0   66.25    5.50 
   1 -34   0   61.18    4.98 
  -1 -34   0   61.02    5.23 
   1 -34   0   58.85    5.14 
  -1 -34   0   60.51    5.15 
  -1  34   0   53.66    4.58 
   1  34   0   55.21    4.66 
  -1  34   0   60.01    4.96 
  -1  34   0   54.75    4.92 
   1  34   0   54.77    4.86 
  -2 -34   0    3.85    3.32 
   2 -34   0    3.95    3.07 
   2 -34   0    0.80    2.69 
  -2 -34   0    0.36    3.24 
   2 -34   0    5.56    3.47 
  -2  34   0    3.05    2.68 
  -2  34   0    3.96    2.63 
  -2  34   0    0.56    2.69 
   2  34   0    0.12    2.51 
   2  34   0    3.54    2.70 
   3 -34   0   41.88    4.74 
   3 -34   0   35.02    4.93 
  -3 -34   0   40.08    4.48 
  -3 -34   0   33.79    4.38 
  -3 -34   0   32.38    3.96 
   3  34   0   39.47    4.14 
   3  34   0   37.26    4.16 
  -3  34   0   32.95    3.94 
  -3  34   0   25.77    4.08 
  -3  34   0   38.70    4.46 
   3  34   0   38.40    4.30 
   4 -34   0   62.95    5.83 
  -4 -34   0   60.96    5.87 
  -4 -34   0   62.06    5.50 
  -4 -34   0   60.20    5.40 
   4 -34   0   50.16    5.35 
  -4  34   0   47.63    5.06 
   4  34   0   52.32    4.84 
   4  34   0   54.02    4.90 
   4  34   0   58.11    5.33 
  -4  34   0   52.12    4.78 
  -4  34   0   62.03    5.52 
   5 -34   0   22.58    4.48 
  -5 -34   0   22.94    4.13 
  -5 -34   0   20.29    4.01 
  -5 -34   0   16.84    4.64 
   5 -34   0   15.44    4.17 
  -5  34   0   16.77    4.18 
   5  34   0   13.68    3.46 
  -5  34   0   17.64    3.85 
   5  34   0   18.08    3.61 
   6 -34   0    7.70    4.37 
   6 -34   0    5.12    3.97 
  -6 -34   0   11.36    3.87 
  -6 -34   0    9.50    4.15 
  -6 -34   0    4.02    4.42 
   6  34   0   12.12    3.51 
   6  34   0   10.06    3.48 
  -6  34   0   -0.44    3.19 
  -6  34   0    7.64    4.59 
  -7 -34   0   35.65    6.78 
   7 -34   0   22.19    5.21 
   7 -34   0   37.11    5.22 
  -7 -34   0   30.20    5.30 
   7  34   0   30.79    4.57 
   7  34   0   31.94    4.27 
  -7  34   0   30.72    5.55 
  -7  34   0   31.69    6.35 
   8 -34   0   23.56    5.72 
   0 -35   0    2.59    3.15 
   0 -35   0   -0.79    3.22 
   0  35   0   -0.76    2.52 
   0  35   0   -0.33    2.68 
   1 -35   0    7.25    3.15 
  -1 -35   0    1.18    3.27 
   1 -35   0    2.84    3.46 
  -1 -35   0    7.24    3.48 
   1 -35   0    4.79    3.15 
  -1  35   0    3.92    2.67 
  -1  35   0    9.71    2.87 
   1  35   0    7.43    2.97 
   1  35   0    8.90    2.80 
  -1  35   0    3.96    2.93 
   2 -35   0    1.63    2.92 
   2 -35   0   -1.78    3.26 
  -2 -35   0    2.61    3.37 
  -2 -35   0    6.06    3.55 
   2 -35   0    1.38    3.02 
  -2  35   0    1.97    2.82 
   2  35   0    4.53    2.81 
   2  35   0    1.74    2.78 
  -2  35   0    3.83    2.87 
  -2  35   0    5.10    2.89 
  -3 -35   0    3.99    3.31 
   3 -35   0   -1.12    3.41 
   3 -35   0    4.98    3.48 
  -3 -35   0   -1.75    3.69 
  -3 -35   0   -2.05    3.51 
   3  35   0   -3.90    2.53 
   3  35   0    2.51    2.82 
  -3  35   0   -1.07    2.95 
  -3  35   0    1.01    3.10 
  -3  35   0    1.78    2.74 
  -4 -35   0   -4.82    3.53 
  -4 -35   0    4.40    3.38 
   4 -35   0   -2.44    3.42 
  -4 -35   0   -0.96    3.00 
   4 -35   0    3.99    3.96 
  -4  35   0    2.53    2.99 
  -4  35   0    5.06    3.45 
  -4  35   0   -3.84    3.08 
   4  35   0    1.40    2.92 
   4  35   0   -1.43    2.89 
   5 -35   0    7.60    3.77 
  -5 -35   0    3.96    3.49 
   5 -35   0   -5.16    3.79 
  -5 -35   0    0.45    3.38 
  -5 -35   0   -9.98    3.61 
   5  35   0   -1.76    2.88 
  -5  35   0    2.34    3.47 
   5  35   0    3.71    3.08 
  -5  35   0    2.16    3.77 
   6 -35   0    4.85    4.06 
  -6 -35   0   -5.97    4.29 
   6 -35   0    1.74    4.01 
  -6 -35   0   -1.35    3.59 
  -6 -35   0    5.99    4.07 
   6  35   0   -1.48    3.22 
   6  35   0    0.20    2.96 
  -6  35   0    1.58    4.12 
  -6  35   0   -3.79    3.39 
  -7 -35   0    1.73    3.81 
   7 -35   0    4.79    4.24 
  -7  35   0    8.63    5.34 
   7  35   0    4.00    3.29 
   0 -36   0   73.82    6.20 
   0 -36   0   66.38    5.65 
   0  36   0   74.77    5.35 
   0  36   0   68.58    5.61 
   1 -36   0   29.21    3.93 
  -1 -36   0   30.21    4.11 
  -1 -36   0   29.27    4.24 
   1 -36   0   30.01    3.89 
   1 -36   0   24.89    4.32 
  -1  36   0   24.29    3.66 
  -1  36   0   17.55    3.58 
   1  36   0   19.98    3.36 
   1  36   0   29.51    3.90 
  -1  36   0   24.66    4.43 
  -2 -36   0    2.89    3.43 
   2 -36   0    6.76    3.44 
  -2 -36   0   -0.50    3.32 
   2 -36   0    6.71    3.70 
   2 -36   0    3.80    3.27 
   2  36   0    3.05    2.77 
  -2  36   0    0.31    2.83 
  -2  36   0    6.39    2.81 
   2  36   0    2.58    2.96 
  -2  36   0    4.19    3.02 
  -3 -36   0   30.17    4.73 
   3 -36   0   32.43    4.66 
   3 -36   0   35.73    4.91 
  -3 -36   0   36.73    4.51 
   3  36   0   37.34    4.15 
  -3  36   0   34.72    4.64 
  -3  36   0   36.33    4.26 
  -3  36   0   21.88    4.09 
   3  36   0   32.76    4.16 
   4 -36   0   26.27    4.74 
  -4 -36   0   29.59    4.52 
  -4 -36   0   26.37    4.77 
  -4 -36   0   24.63    4.13 
   4 -36   0   29.39    4.67 
  -4  36   0   25.49    4.37 
   4  36   0   15.64    3.64 
   4  36   0   28.80    3.93 
  -4  36   0   19.35    4.50 
  -5 -36   0    1.37    4.39 
  -5 -36   0    6.45    3.60 
  -5 -36   0   11.60    4.13 
   5 -36   0   11.94    4.35 
   5 -36   0    7.74    4.09 
  -5  36   0    9.32    3.73 
  -5  36   0    1.97    4.12 
   5  36   0    5.65    3.23 
   5  36   0    2.96    3.21 
   6 -36   0    0.89    4.03 
   6 -36   0   -2.20    4.07 
  -6 -36   0   -3.95    3.50 
  -6 -36   0   -1.49    4.75 
   6  36   0    2.48    3.39 
  -6  36   0   -6.16    3.50 
   6  36   0    3.24    3.22 
  -6  36   0   -0.92    4.06 
  -7 -36   0   34.85    5.54 
   0 -37   0    5.42    3.62 
   0 -37   0    3.33    3.24 
   0  37   0    0.98    2.57 
   0  37   0   -2.48    2.82 
  -1 -37   0   40.50    4.65 
  -1 -37   0   42.50    4.76 
   1 -37   0   49.14    4.56 
   1 -37   0   39.18    4.89 
   1  37   0   48.95    4.72 
  -1  37   0   36.93    4.54 
   1  37   0   52.36    4.47 
  -1  37   0   43.18    4.39 
  -2 -37   0   87.26    6.54 
   2 -37   0   87.14    6.79 
   2 -37   0   89.64    6.35 
  -2 -37   0   81.59    6.51 
  -2  37   0   82.67    5.95 
   2  37   0   78.72    5.93 
  -2  37   0   89.08    6.38 
   2  37   0   78.11    6.13 
  -2  37   0   73.19    6.26 
  -3 -37   0   40.47    5.26 
   3 -37   0   37.63    5.23 
  -3 -37   0   48.02    5.27 
   3 -37   0   42.36    4.89 
  -3  37   0   46.94    5.08 
   3  37   0   45.14    4.66 
   3  37   0   54.05    4.83 
  -3  37   0   43.95    4.46 
  -3  37   0   46.15    5.00 
   4 -37   0    0.36    4.03 
  -4 -37   0   10.90    4.17 
   4 -37   0   14.47    4.21 
  -4 -37   0    5.84    3.81 
  -4  37   0    4.65    3.79 
   4  37   0    3.17    3.17 
  -4  37   0    3.23    3.31 
   4  37   0    7.26    3.17 
   5 -37   0   57.95    6.13 
  -5 -37   0   53.66    5.76 
  -5 -37   0   50.89    6.20 
   5 -37   0   50.51    5.88 
  -5 -37   0   57.78    5.81 
   5  37   0   51.69    5.19 
  -5  37   0   48.81    5.54 
  -5  37   0   59.14    5.94 
   5  37   0   61.62    5.51 
  -6 -37   0   59.23    6.27 
   6 -37   0   58.15    6.34 
   6 -37   0   53.55    6.24 
  -6  37   0   60.66    7.07 
   6  37   0   62.53    5.93 
   6  37   0   59.83    5.64 
  -7 -37   0   10.12    5.01 
   0 -38   0   41.78    4.76 
   0 -38   0   44.68    5.22 
   0  38   0   42.63    4.67 
   0  38   0   49.35    4.53 
  -1 -38   0   16.16    3.97 
   1 -38   0   14.01    3.61 
  -1 -38   0   14.48    3.97 
   1 -38   0   16.20    4.24 
  -1  38   0   11.64    3.26 
  -1  38   0   13.16    3.61 
   1  38   0   16.28    3.48 
   1  38   0   14.32    3.27 
   2 -38   0    4.94    3.88 
  -2 -38   0    5.45    3.82 
  -2 -38   0    3.00    3.53 
   2 -38   0    0.36    3.33 
  -2  38   0    3.26    3.24 
   2  38   0    2.34    2.95 
  -2  38   0    0.52    3.81 
  -2  38   0    0.16    3.07 
   2  38   0   -0.45    2.85 
   3 -38   0   20.16    4.14 
  -3 -38   0   21.36    4.50 
   3 -38   0   20.71    4.69 
  -3 -38   0   12.68    4.27 
  -3  38   0   13.92    3.70 
   3  38   0   15.08    3.55 
   3  38   0   22.34    3.71 
  -3  38   0   10.32    3.73 
   4 -38   0   29.31    5.13 
   4 -38   0   35.71    4.96 
  -4 -38   0   35.75    4.77 
  -4 -38   0   23.33    4.91 
   4  38   0   25.75    4.01 
  -4  38   0   27.93    5.06 
  -4  38   0   26.96    4.48 
   4  38   0   27.42    4.16 
  -5 -38   0    3.58    4.57 
   5 -38   0    4.35    4.10 
   5 -38   0    3.70    4.41 
  -5 -38   0   -1.72    4.98 
  -5 -38   0    9.12    4.20 
  -5  38   0    5.83    4.49 
  -5  38   0   -0.70    3.92 
   5  38   0    5.07    3.36 
   5  38   0    6.82    3.53 
  -6 -38   0    1.34    3.90 
  -6  38   0    3.65    4.43 
   0 -39   0    3.69    3.73 
   0 -39   0    3.50    3.54 
   0  39   0   -0.35    3.12 
   0  39   0    2.40    2.81 
   1 -39   0    4.21    3.84 
  -1 -39   0    3.65    3.74 
   1 -39   0   -0.60    3.24 
  -1 -39   0    2.30    3.71 
   1  39   0    1.72    3.05 
  -1  39   0    1.21    2.75 
  -1  39   0   -2.29    3.17 
   1  39   0    2.86    2.84 
  -2 -39   0   11.86    3.99 
  -2 -39   0    7.66    4.41 
   2 -39   0    7.22    3.75 
   2 -39   0    8.90    3.98 
  -2  39   0    8.50    3.37 
  -2  39   0    6.11    3.58 
   2  39   0    6.76    3.29 
   2  39   0   12.75    3.43 
  -3 -39   0   -3.74    3.78 
   3 -39   0   10.55    3.97 
  -3 -39   0    4.46    3.93 
   3 -39   0    3.26    4.19 
  -3  39   0   -0.38    3.53 
   3  39   0   -0.67    2.99 
  -3  39   0   -1.01    3.34 
   3  39   0    6.96    3.22 
   4 -39   0    2.98    3.94 
  -4 -39   0   -0.86    4.25 
  -4 -39   0    5.35    4.11 
   4 -39   0    8.65    4.51 
   4  39   0    3.56    3.30 
  -4  39   0   -0.59    3.67 
   4  39   0    1.87    3.21 
  -4  39   0    1.27    3.79 
   5 -39   0    5.59    4.32 
  -5 -39   0    3.00    4.13 
   5  39   0    2.96    3.52 
   5  39   0    7.15    3.59 
  -5  39   0    4.52    4.31 
  -6 -39   0    4.63    4.26 
   0 -40   0   76.79    6.47 
   0 -40   0   88.34    7.17 
   0  40   0   76.71    5.80 
   0  40   0   72.64    6.24 
  -1 -40   0   32.83    4.90 
  -1 -40   0   28.58    4.44 
   1 -40   0   18.48    5.88 
   1 -40   0   30.17    4.85 
   1  40   0   27.12    3.90 
   1  40   0   22.98    4.05 
  -1  40   0   21.13    4.13 
  -1  40   0   27.51    3.86 
  -2 -40   0   10.23    3.78 
  -2 -40   0    3.13    3.83 
   2 -40   0    9.67    4.27 
   2  40   0    8.06    3.50 
   2  40   0    3.64    3.00 
  -2  40   0    0.19    3.29 
  -3 -40   0   24.92    4.87 
   3 -40   0   29.39    4.66 
   3 -40   0   32.35    5.34 
  -3 -40   0   33.99    4.88 
   3  40   0   25.65    4.19 
   3  40   0   21.67    3.90 
  -3  40   0   22.48    4.42 
   4 -40   0   54.70    5.70 
  -4 -40   0   34.65    6.10 
  -4 -40   0   46.25    5.43 
   4  40   0   34.94    4.83 
   4  40   0   28.23    4.42 
  -4  40   0   27.93    5.43 
   5 -40   0    8.99    4.63 
  -5 -40   0   12.61    4.73 
  -5  40   0   10.93    4.66 
   0 -41   0    6.08    4.12 
   0 -41   0    4.33    3.68 
   0  41   0    6.26    3.01 
   0  41   0    0.80    3.29 
  -1 -41   0   19.10    4.45 
   1 -41   0   16.43    4.55 
  -1 -41   0   19.49    4.20 
   1  41   0   19.94    3.69 
   1  41   0   17.73    3.97 
  -1  41   0   15.70    3.59 
  -1  41   0   19.86    4.00 
   2 -41   0   48.21    5.68 
  -2 -41   0   54.86    5.53 
  -2 -41   0   41.36    5.50 
   2  41   0   38.39    4.52 
   2  41   0   38.52    4.94 
  -2  41   0   41.68    5.08 
  -3 -41   0   34.49    4.91 
   3 -41   0   37.75    5.10 
  -3 -41   0   35.97    5.35 
   3  41   0   34.25    4.53 
   3  41   0   32.76    4.36 
   4 -41   0    8.80    4.35 
  -4 -41   0   -0.11    4.23 
   4  41   0    1.37    3.47 
  -4  41   0   -2.11    4.31 
  -5 -41   0   47.56    6.10 
  -5  41   0   29.66    6.07 
   0 -42   0   12.06    4.61 
   0 -42   0    9.41    4.21 
   0  42   0   15.81    3.50 
   0  42   0    8.16    3.71 
  -1 -42   0   -1.46    4.15 
   1 -42   0    4.30    4.68 
  -1 -42   0   -0.13    3.90 
  -1  42   0   -0.92    3.50 
   1  42   0    2.99    3.05 
   1  42   0   -0.39    3.34 
  -2 -42   0    1.39    4.04 
  -2 -42   0    9.18    4.20 
   2  42   0    1.82    3.48 
   2  42   0    2.50    3.11 
  -3 -42   0    8.56    5.32 
  -3 -42   0    8.41    4.42 
   3  42   0    6.88    3.38 
  -4 -42   0   13.98    5.11 
   4 -42   0   12.32    4.51 
   0 -43   0    6.39    4.37 
  -1 -43   0    6.09    4.25 
   1  43   0   10.65    3.52 
  -2 -43   0   22.45    5.20 
   2  43   0   15.29    3.73 
   3  43   0    3.98    3.41 
  -1 -44   0   20.99    4.69 
   1  44   0   15.46    4.12 
   2  44   0    2.59    3.42 
  -1 -45   0   10.09    4.73 
 -12   0   1   -0.08    2.99 
 -12   0   1    4.99    3.19 
  12   0  -1    2.70    3.97 
 -12   0   1    0.73    3.61 
  12   0  -1   -2.98    3.33 
  11   0  -1    0.20    2.67 
 -11   0   1    4.90    2.91 
 -11   0   1    3.79    2.81 
  11   0  -1    1.34    3.44 
 -11   0   1    1.83    2.69 
  10   0  -1    2.85    2.39 
 -10   0   1    4.61    2.50 
 -10   0   1   -0.22    2.18 
  10   0  -1    5.89    2.52 
 -10   0   1    4.75    2.48 
  10   0  -1    6.55    3.08 
  -9   0   1    4.07    1.96 
  -9   0   1    0.08    2.11 
  -9   0   1    1.17    1.66 
   9   0  -1    0.37    1.87 
   9   0  -1    0.68    2.01 
  -9   0   1   -0.01    1.99 
   9   0  -1   -0.99    1.75 
   9   0  -1   -0.88    2.34 
  -8   0   1    3.79    1.94 
   8   0  -1    1.74    1.66 
   8   0  -1    2.08    1.93 
  -8   0   1    0.95    1.43 
   8   0  -1    0.55    1.71 
   8   0  -1   -1.33    1.53 
  -8   0   1    0.96    1.70 
   7   0  -1    2.97    1.51 
   7   0  -1    4.07    1.57 
   7   0  -1    2.11    1.47 
  -7   0   1    1.71    1.56 
  -7   0   1    3.76    1.51 
  -7   0   1    3.84    1.39 
   7   0  -1    5.30    1.80 
  -6   0   1    4.01    1.24 
   6   0  -1    3.45    1.31 
   6   0  -1    3.65    1.29 
   6   0  -1    4.42    1.35 
  -6   0   1    5.20    1.50 
   6   0  -1    6.12    1.56 
  -6   0   1    3.13    1.31 
  -5   0   1    1.54    1.00 
   5   0  -1    1.54    1.14 
  -5   0   1    2.50    1.10 
   5   0  -1    1.34    1.09 
   5   0  -1    2.36    1.30 
   5   0  -1    1.52    1.12 
  -5   0   1    0.89    1.14 
   4   0  -1    1.30    0.95 
  -4   0   1    0.51    0.92 
  -4   0   1    1.37    1.02 
   4   0  -1    2.68    1.02 
   4   0  -1    1.08    1.04 
   4   0  -1    0.57    1.05 
   3   0  -1   -0.80    0.87 
  -3   0   1    2.01    1.07 
   3   0  -1    0.82    0.84 
  -3   0   1   -0.15    0.84 
   3   0  -1    1.75    0.97 
  -3   0   1    4.45    1.02 
   3   0  -1    2.95    1.02 
  -3   0   1    3.07    0.80 
  -2   0   1   -0.28    0.60 
   2   0  -1    0.70    0.75 
  -2   0   1   -0.40    0.84 
  -2   0   1    0.17    0.74 
   2   0  -1   -0.59    0.63 
  -2   0   1    0.66    0.76 
   2   0  -1    0.29    0.66 
   2   0  -1   -0.71    0.72 
  -2   0   1    0.41    0.68 
   2   0  -1    1.07    0.77 
  -2   0   1   -0.94    0.64 
   2   0  -1    0.31    0.62 
   1   0  -1   -0.44    0.39 
  -1   0   1    0.35    0.27 
  -1   0   1   -0.34    0.31 
  -1   0   1   -0.28    0.25 
   1   0  -1   -0.31    0.28 
   1   0  -1   -0.10    0.47 
   1   0  -1   -0.35    0.28 
  -1   0   1    0.19    0.46 
  -1   0   1   -0.30    0.36 
  -1   0   1    0.70    0.46 
   1   0  -1    0.29    0.34 
   1   0  -1    0.01    0.26 
   0   0   1   -0.03    0.21 
   0   0  -1   -0.11    0.20 
   0   0  -1   -0.03    0.20 
   0   0  -1    0.04    0.21 
   0   0   1   -0.07    0.18 
   0   0   1   -0.09    0.29 
   0   0  -1   -0.04    0.33 
   0   0   1   -0.11    0.36 
   0   0   1   -0.39    0.17 
   0   0  -1   -0.20    0.32 
   0   0   1    0.90    0.38 
   0   0  -1    0.30    0.36 
   1   0   1    0.37    0.44 
  -1   0  -1    0.75    0.56 
   1   0   1    0.16    0.54 
  -1   0  -1   -0.48    0.56 
  -1   0  -1   -0.21    0.64 
   1   0   1    0.59    0.54 
   1   0   1   -0.46    0.60 
   1   0   1    0.63    0.60 
  -1   0  -1   -0.32    0.55 
  -1   0  -1    0.21    0.63 
   1   0   1    0.02    0.51 
  -1   0  -1    0.73    0.54 
  -1   0  -1    0.54    0.54 
  -1   0  -1   -1.36    0.41 
   1   0   1   -1.65    0.57 
   1   0   1    0.52    0.58 
  -1   0  -1   -0.17    0.46 
  -2   0  -1    2.50    0.89 
  -2   0  -1   -0.14    0.73 
   2   0   1    1.42    0.83 
   2   0   1   -0.40    0.85 
  -2   0  -1   -0.50    0.90 
   2   0   1    0.98    0.87 
   2   0   1    0.94    0.76 
   2   0   1    0.98    1.03 
  -2   0  -1   -2.06    0.64 
   2   0   1   -1.12    0.72 
  -2   0  -1    0.95    0.70 
   2   0   1    1.27    0.86 
  -2   0  -1    1.01    0.80 
  -2   0  -1    0.31    0.92 
  -3   0  -1   -2.35    0.91 
   3   0   1    0.92    0.97 
   3   0   1    0.33    0.88 
   3   0   1    1.11    1.19 
   3   0   1    0.51    0.97 
  -3   0  -1    0.62    1.02 
   3   0   1    1.79    0.89 
   3   0   1    1.15    1.06 
   3   0   1    1.56    0.96 
  -3   0  -1    0.84    0.88 
  -4   0  -1    1.47    0.99 
  -4   0  -1    1.84    0.98 
   4   0   1    2.34    1.08 
   4   0   1    0.78    1.27 
   4   0   1    1.61    1.05 
   4   0   1    4.01    1.45 
  -4   0  -1    1.92    1.20 
   4   0   1    0.59    1.09 
  -4   0  -1   -2.98    1.03 
   4   0   1    2.49    1.16 
   4   0   1    1.78    1.11 
  -5   0  -1    5.87    1.50 
   5   0   1    4.16    1.33 
   5   0   1    4.13    1.29 
  -5   0  -1    4.50    1.22 
   5   0   1    5.42    1.42 
   5   0   1    4.61    1.68 
   5   0   1    5.08    1.32 
   5   0   1    4.08    1.55 
  -5   0  -1    2.70    1.20 
   5   0   1    4.13    1.25 
  -5   0  -1   -0.12    1.16 
  -6   0  -1    2.29    1.33 
  -6   0  -1    1.54    1.34 
   6   0   1    0.11    1.36 
  -6   0  -1   -0.08    1.25 
   6   0   1    2.57    1.77 
   6   0   1    0.72    1.43 
   6   0   1   -1.08    1.31 
   6   0   1    2.03    1.38 
  -6   0  -1    1.94    1.52 
   6   0   1    0.82    1.68 
   6   0   1    2.95    1.53 
  -7   0  -1    1.32    1.56 
  -7   0  -1    3.37    1.55 
   7   0   1    1.40    1.97 
   7   0   1    2.98    1.66 
   7   0   1    1.83    1.70 
  -7   0  -1   -0.96    1.41 
   7   0   1    0.62    1.55 
  -7   0  -1    0.76    1.46 
   7   0   1    2.60    2.02 
  -7   0  -1    0.87    1.71 
   7   0   1    2.20    1.61 
   7   0   1   -1.70    1.48 
  -8   0  -1    1.22    1.68 
  -8   0  -1    3.44    2.23 
   8   0   1    1.12    2.39 
   8   0   1    2.17    2.41 
   8   0   1    1.23    1.97 
   8   0   1    3.18    2.13 
   8   0   1    3.60    2.04 
  -8   0  -1    3.67    2.04 
  -8   0  -1    2.49    1.86 
   8   0   1    2.26    1.83 
  -8   0  -1    6.10    2.26 
  -8   0  -1    0.63    1.69 
  -9   0  -1    2.93    2.46 
  -9   0  -1    3.94    2.24 
  -9   0  -1    3.07    2.52 
   9   0   1    4.65    2.25 
  -9   0  -1    2.66    2.18 
   9   0   1    0.90    2.23 
   9   0   1    7.11    2.69 
   9   0   1    6.43    3.13 
  -9   0  -1    2.84    2.46 
  -9   0  -1    1.24    2.08 
 -10   0  -1    3.00    2.51 
 -10   0  -1    0.97    2.73 
  10   0   1    3.93    3.35 
  10   0   1    7.62    2.83 
 -10   0  -1    5.79    2.76 
 -10   0  -1   -1.62    3.04 
  10   0   1    4.46    2.92 
 -11   0  -1    0.81    3.03 
  11   0   1   -2.41    3.52 
  11   0   1   -9.12    2.93 
  11   0   1   -4.75    3.16 
 -11   0  -1    3.43    3.34 
 -11   0  -1    1.60    2.97 
 -11   0  -1   -1.03    2.89 
 -12   0  -1   -2.77    3.60 
 -12   0  -1    0.99    3.79 
  12   0   1    0.68    3.87 
 -13  -1   1   11.91    3.98 
  13   1  -1   13.72    5.62 
  12  -1  -1    2.14    3.59 
 -12  -1   1    4.76    3.33 
  12  -1  -1    3.25    3.20 
 -12  -1   1    5.24    3.35 
 -12  -1   1    1.21    3.06 
  12   1  -1    9.54    3.59 
 -12   1   1    2.75    3.08 
  12   1  -1    3.19    4.11 
 -12   1   1    4.00    3.12 
 -12   1   1    4.63    3.39 
  11  -1  -1   42.65    5.47 
 -11  -1   1   46.02    4.42 
 -11  -1   1   29.34    4.24 
 -11  -1   1   35.14    4.22 
  11  -1  -1   35.68    4.14 
 -11   1   1   30.93    3.98 
  11   1  -1   37.52    4.11 
 -11   1   1   43.36    4.61 
  11   1  -1   43.98    5.17 
 -11   1   1   33.46    4.16 
 -10  -1   1   62.24    5.00 
  10  -1  -1   53.31    4.51 
 -10  -1   1   50.32    4.48 
  10  -1  -1   50.86    4.59 
  10  -1  -1   56.70    5.29 
 -10  -1   1   57.82    4.86 
 -10   1   1   55.24    4.63 
 -10   1   1   58.10    4.87 
  10   1  -1   47.10    4.41 
  10   1  -1   56.82    5.39 
 -10   1   1   56.71    4.80 
  10   1  -1   54.88    4.64 
   9  -1  -1   11.84    2.51 
   9  -1  -1    8.47    2.79 
  -9  -1   1    8.33    2.55 
  -9  -1   1    9.17    1.93 
   9  -1  -1    7.69    2.52 
   9  -1  -1    6.37    2.31 
  -9  -1   1   11.03    2.49 
  -9   1   1   13.11    2.47 
   9   1  -1   12.02    2.32 
   9   1  -1    9.00    2.38 
  -9   1   1    9.84    2.46 
  -9   1   1    8.99    2.39 
   9   1  -1    8.84    2.51 
   9   1  -1   14.19    3.01 
  -8  -1   1    8.87    1.84 
   8  -1  -1   10.45    2.05 
   8  -1  -1    7.47    2.37 
   8  -1  -1    7.30    2.03 
  -8  -1   1   10.79    2.04 
   8  -1  -1    6.95    2.06 
  -8  -1   1    9.29    2.28 
   8   1  -1   12.17    2.01 
  -8   1   1   10.21    2.21 
   8   1  -1   10.26    1.93 
   8   1  -1   11.12    2.48 
  -8   1   1    9.18    2.06 
  -8   1   1    7.53    1.98 
   8   1  -1   11.08    2.12 
   7  -1  -1   98.50    5.02 
   7  -1  -1   85.41    4.67 
  -7  -1   1   78.41    4.42 
  -7  -1   1   87.17    4.65 
   7  -1  -1   89.75    4.68 
  -7  -1   1   90.38    4.94 
   7  -1  -1   80.75    4.63 
   7   1  -1   88.80    4.69 
   7   1  -1   94.09    4.97 
   7   1  -1   92.21    4.63 
   7   1  -1   84.03    4.67 
  -7   1   1   83.92    4.62 
  -7   1   1   87.09    4.75 
  -7   1   1   83.68    4.33 
   6  -1  -1  169.99    7.62 
  -6  -1   1  162.11    7.52 
   6  -1  -1  185.01    7.91 
   6  -1  -1  169.55    7.67 
   6  -1  -1  163.47    7.54 
  -6  -1   1  181.39    7.80 
  -6  -1   1  166.61    7.44 
   6   1  -1  173.09    7.57 
   6   1  -1  181.91    7.88 
   6   1  -1  171.12    7.62 
  -6   1   1  172.43    7.73 
   6   1  -1  171.79    7.52 
  -6   1   1  167.27    7.56 
  -5  -1   1   74.67    3.80 
   5  -1  -1   78.45    4.00 
   5  -1  -1   77.34    3.92 
   5  -1  -1   74.83    4.09 
  -5  -1   1   80.34    4.05 
  -5  -1   1   75.50    3.70 
   5  -1  -1   70.65    3.80 
  -5   1   1   75.20    3.83 
  -5   1   1   83.94    3.97 
   5   1  -1   75.31    3.92 
   5   1  -1   74.59    3.83 
   5   1  -1   77.67    3.81 
   5   1  -1   81.35    4.05 
  -4  -1   1  133.12    5.83 
  -4  -1   1  126.77    5.67 
   4  -1  -1  122.00    5.71 
  -4  -1   1  133.60    5.60 
   4  -1  -1  123.75    5.66 
   4  -1  -1  137.22    5.90 
   4  -1  -1  124.29    5.78 
  -4   1   1  133.92    5.78 
   4   1  -1  138.42    5.88 
   4   1  -1  134.08    5.69 
   4   1  -1  128.87    5.69 
  -4   1   1  133.35    5.70 
   4   1  -1  127.29    5.73 
  -3  -1   1  230.80    9.25 
  -3  -1   1  225.50    9.30 
  -3  -1   1  240.24    9.44 
   3  -1  -1  231.19    9.42 
   3  -1  -1  246.09    9.49 
   3  -1  -1  216.73    9.29 
  -3  -1   1  230.89    9.33 
   3  -1  -1  218.54    9.33 
   3   1  -1  240.70    9.43 
   3   1  -1  222.85    9.20 
   3   1  -1  231.29    9.32 
  -3   1   1  229.29    9.34 
   3   1  -1  222.11    9.34 
   3   1  -1  222.27    9.31 
  -3   1   1  223.28    9.34 
   2  -1  -1   36.22    1.93 
  -2  -1   1   37.72    2.01 
   2  -1  -1   33.52    1.89 
  -2  -1   1   40.75    2.01 
  -2  -1   1   36.24    1.87 
  -2  -1   1   36.32    1.91 
  -2  -1   1   37.21    1.94 
   2  -1  -1   37.45    1.98 
   2  -1  -1   37.71    1.97 
   2  -1  -1   36.28    2.03 
  -2  -1   1   34.89    1.90 
   2   1  -1   40.45    1.99 
   2   1  -1   38.18    1.98 
   2   1  -1   35.74    1.88 
  -2   1   1   32.53    1.90 
  -2   1   1   36.68    2.08 
   2   1  -1   42.43    2.08 
  -2   1   1   34.95    1.89 
   2   1  -1   37.88    1.90 
  -2   1   1   36.98    1.91 
   2   1  -1   37.85    1.91 
  -2   1   1   38.49    2.00 
  -2   1   1   37.14    1.89 
   2   1  -1   34.48    1.91 
  -1  -1   1    0.64    0.51 
  -1  -1   1    0.41    0.29 
   1  -1  -1    1.04    0.48 
   1  -1  -1    0.90    0.45 
   1  -1  -1   -0.13    0.33 
  -1  -1   1   -0.17    0.31 
  -1  -1   1   -0.21    0.39 
  -1  -1   1    0.14    0.42 
   1  -1  -1   -0.07    0.33 
   1  -1  -1    0.30    0.29 
  -1  -1   1    0.34    0.34 
  -1  -1   1    0.41    0.38 
   1   1  -1    0.04    0.28 
   1   1  -1    0.38    0.32 
  -1   1   1    0.05    0.38 
   1   1  -1    1.46    0.45 
  -1   1   1    1.45    0.54 
   1   1  -1    1.86    0.51 
   1   1  -1   -0.14    0.28 
  -1   1   1   -0.28    0.28 
   1   1  -1    0.65    0.33 
   1   1  -1    0.83    0.42 
  -1   1   1    0.03    0.47 
  -1   1   1   -0.08    0.34 
   1  -1   1  475.32   18.28 
  -1  -1  -1  482.27   18.32 
  -1  -1  -1  483.83   18.22 
   1  -1   1  462.31   18.18 
   1  -1   1  467.92   18.31 
  -1  -1  -1  449.06   18.24 
   1  -1   1  467.18   18.27 
  -1  -1  -1  445.34   18.21 
  -1  -1  -1  463.27   18.26 
   1  -1   1  477.88   18.32 
   1  -1   1  434.71   18.23 
   1  -1   1  443.61   18.16 
   1  -1   1  448.70   18.18 
  -1  -1  -1  469.64   18.23 
   1  -1   1  452.12   18.22 
  -1  -1  -1  463.06   18.21 
  -1  -1  -1  453.45   18.17 
  -1  -1  -1  501.89   18.27 
  -1  -1  -1  460.09   18.24 
   1   1   1  450.72   18.20 
   1   1   1  460.76   18.25 
   1   1   1  455.02   18.22 
  -1   1  -1  461.77   18.18 
  -1   1  -1  453.35   18.16 
   1   1   1  452.92   18.22 
  -1   1  -1  483.72   18.20 
  -1   1  -1  479.17   18.26 
   1   1   1  450.03   18.23 
   1   1   1  494.49   18.27 
   1   1   1  444.76   18.20 
  -1   1  -1  452.95   18.22 
  -1   1  -1  476.04   18.31 
  -1   1  -1  481.04   18.34 
   1   1   1  460.87   18.17 
   1   1   1  480.69   18.35 
   1   1   1  444.74   18.24 
  -1   1  -1  468.30   18.27 
  -1   1  -1  462.43   18.27 
   2  -1   1  118.26    5.30 
   2  -1   1  129.35    5.39 
   2  -1   1  130.30    5.49 
  -2  -1  -1  124.74    5.28 
  -2  -1  -1  121.01    5.40 
   2  -1   1  127.83    5.28 
   2  -1   1  135.35    5.45 
  -2  -1  -1  127.86    5.32 
  -2  -1  -1  129.00    5.33 
   2  -1   1  119.06    5.23 
  -2  -1  -1  135.98    5.30 
  -2  -1  -1  117.46    5.27 
   2  -1   1  124.76    5.29 
  -2  -1  -1  120.67    5.40 
   2   1   1  127.98    5.26 
  -2   1  -1  125.26    5.25 
   2   1   1  120.74    5.30 
   2   1   1  127.15    5.31 
  -2   1  -1  123.34    5.24 
  -2   1  -1  126.12    5.39 
   2   1   1  132.20    5.60 
  -2   1  -1  133.89    5.50 
   2   1   1  124.78    5.28 
  -2   1  -1  122.50    5.23 
   2   1   1  122.38    5.31 
  -2   1  -1  129.82    5.28 
   2   1   1  139.19    5.38 
  -2   1  -1  130.60    5.40 
   3  -1   1   34.33    2.49 
   3  -1   1   33.36    2.10 
   3  -1   1   33.06    2.05 
   3  -1   1   36.24    2.15 
   3  -1   1   35.30    2.24 
  -3  -1  -1   32.90    2.28 
  -3  -1  -1   37.12    2.09 
  -3  -1  -1   33.70    2.07 
   3  -1   1   36.73    2.37 
  -3  -1  -1   30.19    2.08 
   3  -1   1   30.64    2.10 
  -3   1  -1   33.38    2.05 
   3   1   1   33.94    2.11 
  -3   1  -1   33.92    2.26 
   3   1   1   35.39    2.14 
   3   1   1   37.19    2.17 
   3   1   1   34.50    2.12 
   3   1   1   34.97    2.14 
   3   1   1   41.40    2.29 
   3   1   1   40.43    2.56 
   4  -1   1   80.66    3.89 
  -4  -1  -1   84.32    4.16 
   4  -1   1   81.93    3.95 
   4  -1   1   84.80    3.93 
   4  -1   1   74.51    3.85 
  -4  -1  -1   78.10    3.86 
   4  -1   1   82.62    4.05 
   4  -1   1   81.72    4.21 
  -4  -1  -1   80.97    3.89 
   4  -1   1   85.06    4.27 
  -4   1  -1   83.08    3.89 
   4   1   1   81.77    3.86 
   4   1   1   85.66    4.15 
   4   1   1   88.51    4.44 
   4   1   1   82.98    3.91 
  -4   1  -1   84.47    4.13 
  -4   1  -1   77.25    3.81 
   4   1   1   85.59    3.96 
   4   1   1   82.39    3.92 
   4   1   1   78.37    3.95 
  -5  -1  -1  147.74    6.43 
   5  -1   1  141.97    6.44 
   5  -1   1  144.19    6.30 
   5  -1   1  141.92    6.39 
  -5  -1  -1  138.95    6.37 
   5  -1   1  141.31    6.76 
   5  -1   1  146.19    6.58 
   5  -1   1  146.40    6.45 
  -5  -1  -1  137.18    6.27 
  -5  -1  -1  145.29    6.73 
   5  -1   1  146.38    6.90 
  -5   1  -1  139.98    6.34 
   5   1   1  141.23    6.44 
   5   1   1  149.31    6.46 
  -5   1  -1  141.86    6.63 
  -5   1  -1  149.06    6.44 
   5   1   1  141.63    6.28 
   5   1   1  145.77    6.90 
   5   1   1  146.77    6.44 
   5   1   1  156.01    6.94 
   5   1   1  142.38    6.47 
  -5   1  -1  141.97    6.36 
  -5   1  -1  147.78    6.31 
   6  -1   1   29.45    2.33 
  -6  -1  -1   33.55    2.49 
  -6  -1  -1   33.86    2.92 
   6  -1   1   28.48    2.44 
   6  -1   1   24.36    2.43 
  -6  -1  -1   33.82    2.58 
   6  -1   1   28.71    2.45 
   6  -1   1   26.09    2.30 
  -6  -1  -1   29.98    2.37 
   6  -1   1   33.37    2.98 
   6  -1   1   31.58    2.96 
   6   1   1   29.82    2.37 
   6   1   1   34.80    2.64 
   6   1   1   36.49    3.23 
   6   1   1   32.94    3.05 
   6   1   1   27.16    2.37 
  -6   1  -1   27.46    2.29 
   6   1   1   26.98    2.40 
  -6   1  -1   27.65    2.37 
  -6   1  -1   32.00    2.70 
  -6   1  -1   27.58    2.39 
   6   1   1   29.80    2.64 
  -6   1  -1   31.76    2.39 
   7  -1   1    2.68    2.06 
  -7  -1  -1    6.90    1.77 
  -7  -1  -1    5.77    2.03 
  -7  -1  -1    7.33    1.80 
   7  -1   1    1.32    2.07 
   7  -1   1    4.06    1.82 
  -7  -1  -1    5.72    1.70 
   7  -1   1    0.80    1.57 
  -7  -1  -1    5.21    1.60 
   7  -1   1    3.02    1.73 
   7  -1   1    3.81    1.69 
   7  -1   1    4.07    1.70 
   7   1   1    4.50    1.68 
  -7   1  -1    2.37    1.82 
  -7   1  -1    3.78    1.55 
  -7   1  -1    2.75    1.61 
   7   1   1    8.72    1.74 
  -7   1  -1    0.81    1.51 
  -7   1  -1    5.62    1.63 
   7   1   1    9.19    2.28 
   7   1   1    9.00    1.89 
   7   1   1    6.74    2.33 
   7   1   1    7.36    1.91 
   8  -1   1   52.55    4.16 
  -8  -1  -1   51.92    4.37 
  -8  -1  -1   54.65    4.08 
   8  -1   1   55.05    4.17 
  -8  -1  -1   46.31    3.77 
   8  -1   1   53.99    3.85 
  -8  -1  -1   50.77    3.93 
   8  -1   1   55.97    4.87 
  -8  -1  -1   57.31    4.32 
   8  -1   1   59.92    4.25 
  -8  -1  -1   49.65    3.46 
   8   1   1   55.89    4.74 
  -8   1  -1   49.96    4.34 
  -8   1  -1   49.00    3.81 
   8   1   1   44.40    4.01 
   8   1   1   52.23    4.71 
  -8   1  -1   53.27    4.05 
   8   1   1   49.21    4.18 
   8   1   1   49.65    4.11 
   8   1   1   50.15    3.59 
  -8   1  -1   51.68    3.92 
  -8   1  -1   51.54    3.70 
   9  -1   1   58.12    4.88 
  -9  -1  -1   52.53    4.24 
   9  -1   1   57.14    4.53 
  -9  -1  -1   66.79    5.44 
  -9  -1  -1   53.53    4.46 
  -9  -1  -1   56.11    4.83 
   9  -1   1   62.23    4.77 
   9  -1   1   61.52    5.45 
  -9  -1  -1   56.43    4.70 
   9   1   1   58.22    4.93 
  -9   1  -1   62.65    5.07 
   9   1   1   62.90    4.86 
  -9   1  -1   55.01    4.93 
  -9   1  -1   62.08    4.63 
  -9   1  -1   49.48    4.16 
   9   1   1   55.20    4.69 
  -9   1  -1   63.14    5.63 
  -9   1  -1   54.63    4.67 
   9   1   1   61.04    5.57 
 -10  -1  -1   14.01    3.36 
  10  -1   1   22.33    3.41 
 -10  -1  -1   17.86    3.70 
  10  -1   1   18.66    4.49 
  10  -1   1   18.16    3.38 
 -10  -1  -1   20.10    3.58 
 -10  -1  -1   17.91    4.02 
 -10   1  -1   15.19    3.05 
  10   1   1   16.74    3.58 
  10   1   1   20.80    3.66 
 -10   1  -1   14.51    3.52 
  10   1   1   19.83    4.29 
 -10   1  -1   15.67    4.21 
 -11  -1  -1    4.50    3.20 
 -11  -1  -1    1.78    2.66 
 -11  -1  -1    2.80    3.06 
 -11  -1  -1    7.05    3.50 
  11  -1   1    2.32    3.22 
  11  -1   1   -0.64    3.60 
 -11   1  -1    2.84    3.43 
 -11   1  -1    1.20    2.86 
 -11   1  -1    5.77    3.09 
  11   1   1    4.32    4.20 
  11   1   1    6.38    3.49 
 -11   1  -1    3.72    3.26 
 -12  -1  -1   19.68    4.28 
  12  -1   1   26.59    6.13 
 -12  -1  -1   20.46    4.38 
  12  -1   1   23.57    4.50 
 -12  -1  -1   26.85    4.73 
 -12   1  -1   18.53    4.65 
 -12   1  -1   21.07    4.26 
  12   1   1   22.95    4.34 
 -12   1  -1   20.71    4.62 
 -13  -2   1   13.58    5.05 
  13   2  -1   15.78    5.32 
 -12  -2   1   52.48    5.70 
  12  -2  -1   59.42    6.75 
 -12  -2   1   53.94    5.40 
  12  -2  -1   52.03    5.35 
 -12  -2   1   50.22    4.72 
  12   2  -1   54.73    5.41 
  12   2  -1   57.23    6.53 
 -12   2   1   43.01    5.12 
 -12   2   1   50.85    5.99 
 -12   2   1   63.83    5.57 
 -11  -2   1   44.80    4.75 
  11  -2  -1   49.89    4.85 
 -11  -2   1   43.74    4.71 
 -11  -2   1   45.09    5.14 
  11  -2  -1   48.99    5.90 
  11   2  -1   42.59    5.46 
  11   2  -1   37.02    4.87 
  11   2  -1   46.17    4.50 
 -11   2   1   43.91    4.66 
 -11   2   1   54.95    5.03 
 -11   2   1   50.12    5.35 
  10  -2  -1   14.39    2.77 
 -10  -2   1    9.22    2.88 
  10  -2  -1    9.04    2.71 
  10  -2  -1   12.35    3.28 
 -10  -2   1    8.76    2.70 
 -10  -2   1   11.23    2.76 
  10   2  -1    9.10    2.62 
  10   2  -1    9.04    2.70 
 -10   2   1   10.50    2.79 
 -10   2   1    6.91    2.55 
 -10   2   1    9.34    2.69 
  10   2  -1    7.92    3.13 
   9  -2  -1   80.31    5.22 
  -9  -2   1   58.64    4.25 
  -9  -2   1   66.47    4.89 
   9  -2  -1   74.29    5.57 
  -9  -2   1   74.09    5.31 
   9  -2  -1   71.06    4.92 
   9   2  -1   68.73    5.23 
   9   2  -1   77.70    4.69 
  -9   2   1   73.85    4.85 
   9   2  -1   65.79    4.97 
   9   2  -1   70.40    4.84 
  -9   2   1   73.79    4.95 
  -9   2   1   75.85    4.97 
  -8  -2   1  153.74    7.73 
  -8  -2   1  146.42    7.16 
   8  -2  -1  159.74    7.61 
   8  -2  -1  151.94    8.12 
  -8  -2   1  156.63    7.40 
   8  -2  -1  157.60    7.54 
   8  -2  -1  159.42    7.56 
  -8   2   1  164.05    7.75 
   8   2  -1  157.67    7.86 
   8   2  -1  143.19    7.49 
   8   2  -1  160.30    7.46 
  -8   2   1  163.78    7.67 
   8   2  -1  156.85    7.43 
  -8   2   1  148.16    7.44 
  -7  -2   1   33.28    2.67 
  -7  -2   1   40.81    3.23 
   7  -2  -1   34.52    3.02 
  -7  -2   1   30.97    2.51 
   7  -2  -1   35.32    2.88 
   7  -2  -1   33.97    2.87 
   7  -2  -1   32.01    2.98 
  -7   2   1   35.84    3.01 
   7   2  -1   29.84    2.59 
  -7   2   1   29.65    2.59 
   7   2  -1   31.36    2.68 
  -7   2   1   28.10    2.60 
   7   2  -1   33.64    2.71 
   7   2  -1   34.09    2.97 
  -6  -2   1   33.34    2.72 
   6  -2  -1   27.75    2.56 
   6  -2  -1   31.13    2.49 
   6  -2  -1   33.42    2.69 
  -6  -2   1   25.17    2.28 
   6  -2  -1   31.90    2.53 
  -6  -2   1   27.02    2.29 
   6   2  -1   34.14    2.52 
   6   2  -1   32.46    2.67 
  -6   2   1   28.47    2.40 
   6   2  -1   29.25    2.29 
  -6   2   1   30.31    2.55 
   6   2  -1   26.37    2.26 
   5  -2  -1  189.31    8.33 
  -5  -2   1  195.22    8.17 
  -5  -2   1  190.90    8.09 
   5  -2  -1  188.08    8.21 
   5  -2  -1  181.96    8.11 
   5  -2  -1  193.82    8.42 
  -5  -2   1  202.23    8.38 
   5   2  -1  195.94    8.32 
   5   2  -1  192.08    8.20 
  -5   2   1  186.75    8.22 
  -5   2   1  187.00    8.13 
   5   2  -1  186.65    8.06 
   5   2  -1  196.31    8.19 
   4  -2  -1  210.20    8.94 
   4  -2  -1  207.50    8.81 
   4  -2  -1  220.59    8.98 
   4  -2  -1  199.39    8.73 
  -4  -2   1  213.92    8.79 
  -4  -2   1  221.17    8.96 
  -4  -2   1  204.29    8.71 
   4   2  -1  209.71    8.82 
   4   2  -1  214.51    8.72 
   4   2  -1  222.14    8.92 
  -4   2   1  207.65    8.80 
   4   2  -1  208.30    8.76 
  -4   2   1  204.67    8.75 
   3  -2  -1   54.33    2.97 
  -3  -2   1   54.35    2.69 
  -3  -2   1   54.15    2.75 
   3  -2  -1   49.62    2.77 
  -3  -2   1   58.28    2.89 
  -3  -2   1   50.95    2.66 
   3  -2  -1   55.42    2.84 
   3   2  -1   53.18    2.77 
   3   2  -1   56.23    2.84 
   3   2  -1   56.32    2.81 
  -3   2   1   57.54    2.75 
   3   2  -1   52.37    2.64 
  -3   2   1   53.08    2.72 
   3   2  -1   52.89    2.71 
  -2  -2   1    1.52    0.68 
  -2  -2   1    0.53    0.73 
   2  -2  -1    1.45    0.71 
   2  -2  -1    1.34    0.69 
   2  -2  -1    1.76    0.77 
  -2  -2   1   -0.10    0.74 
  -2  -2   1    3.04    0.88 
  -2  -2   1    1.51    0.70 
  -2  -2   1    2.61    0.73 
   2  -2  -1    2.06    0.86 
   2  -2  -1    0.62    0.78 
  -2  -2   1    2.48    0.85 
  -2   2   1    2.49    0.74 
  -2   2   1    1.15    0.72 
   2   2  -1    1.32    0.68 
  -2   2   1    3.07    0.75 
   2   2  -1    1.65    0.84 
   2   2  -1    0.56    0.66 
  -2   2   1    3.19    0.84 
   2   2  -1    3.29    0.89 
  -2   2   1    2.22    0.73 
  -2   2   1    1.88    1.01 
   2   2  -1    0.85    0.80 
   2   2  -1    1.47    0.72 
   1  -2  -1  778.77   29.50 
  -1  -2   1  645.94   29.48 
   1  -2  -1  782.42   29.52 
   1  -2  -1  795.17   29.52 
   1  -2  -1  764.76   29.49 
  -1  -2   1  764.24   29.46 
  -1  -2   1  787.76   29.49 
  -1  -2   1  808.72   29.53 
  -1  -2   1  831.43   29.58 
  -1  -2   1  628.59   29.49 
  -1   2   1  647.29   29.48 
   1   2  -1  792.97   29.53 
   1   2  -1  682.99   29.47 
   1   2  -1  733.00   29.45 
   1   2  -1  851.22   29.58 
  -1   2   1  705.38   29.50 
  -1   2   1  798.27   29.56 
  -1   2   1  784.80   29.50 
  -1   2   1  728.91   29.54 
  -1   2   1  775.42   29.48 
   0  -2  -1  311.83   12.21 
  -1  -2  -1    9.09    0.80 
   1  -2   1    8.41    0.87 
  -1  -2  -1    8.68    0.81 
   1  -2   1    8.38    0.80 
  -1  -2  -1    7.89    0.88 
  -1  -2  -1    8.12    0.84 
  -1  -2  -1   10.00    0.76 
   1  -2   1    9.12    0.92 
  -1  -2  -1    9.29    0.87 
   1  -2   1   11.09    0.83 
   1  -2   1   11.49    1.01 
  -1  -2  -1    9.53    0.76 
  -1  -2  -1    9.36    0.76 
   1  -2   1    6.38    0.69 
  -1  -2  -1    9.74    0.83 
   1  -2   1    8.47    0.94 
  -1  -2  -1   10.84    0.97 
   1   2   1    9.86    0.81 
  -1   2  -1    9.34    0.90 
   1   2   1   11.00    0.81 
  -1   2  -1    8.56    0.90 
   1   2   1    6.90    0.89 
  -1   2  -1   10.88    0.98 
  -1   2  -1    8.96    0.77 
   1   2   1    9.61    0.80 
   1   2   1    7.45    0.84 
  -1   2  -1    9.16    0.92 
   1   2   1    7.90    0.66 
  -1   2  -1    8.81    0.73 
  -1   2  -1    9.94    0.91 
   1   2   1   13.70    1.07 
  -1   2  -1   10.54    0.86 
   1   2   1    9.43    0.88 
  -1   2  -1    9.40    0.72 
   2  -2   1   62.30    3.18 
  -2  -2  -1   64.94    3.02 
   2  -2   1   71.67    3.25 
  -2  -2  -1   64.74    2.99 
   2  -2   1   71.35    3.23 
   2  -2   1   66.75    3.05 
   2  -2   1   64.86    3.02 
  -2  -2  -1   63.51    3.09 
   2  -2   1   62.35    2.96 
   2  -2   1   61.85    3.09 
  -2  -2  -1   63.17    3.06 
  -2  -2  -1   70.08    2.99 
  -2  -2  -1   63.54    3.60 
   2   2   1   72.39    3.42 
  -2   2  -1   65.01    3.00 
   2   2   1   66.31    3.00 
  -2   2  -1   65.72    2.95 
   2   2   1   64.28    3.08 
  -2   2  -1   68.95    3.11 
  -2   2  -1   66.57    3.15 
   2   2   1   65.85    3.05 
   2   2   1   74.54    3.11 
  -2   2  -1   67.35    3.15 
  -2   2  -1   65.88    2.96 
   2   2   1   69.63    3.12 
   2   2   1   68.99    3.02 
  -2   2  -1   66.74    3.04 
   3  -2   1  124.21    5.59 
   3  -2   1  134.40    5.90 
   3  -2   1  128.72    5.56 
   3  -2   1  122.21    5.52 
   3  -2   1  130.06    5.62 
  -3  -2  -1  131.42    5.58 
   3  -2   1  133.23    5.86 
   3  -2   1  128.09    5.73 
  -3  -2  -1  131.38    5.87 
  -3  -2  -1  128.44    5.53 
  -3  -2  -1  130.55    5.61 
   3   2   1  131.20    5.65 
   3   2   1  142.68    6.03 
   3   2   1  142.41    5.70 
  -3   2  -1  121.59    5.69 
   3   2   1  127.80    5.57 
  -3   2  -1  133.27    5.61 
   3   2   1  135.06    5.58 
  -3   2  -1  129.57    5.55 
   3   2   1  135.01    5.60 
   3   2   1  127.95    5.59 
   4  -2   1   80.83    4.11 
  -4  -2  -1   78.28    3.86 
   4  -2   1   88.05    4.33 
  -4  -2  -1   80.35    3.92 
   4  -2   1   87.23    3.93 
  -4  -2  -1   85.24    4.33 
   4  -2   1   84.06    3.88 
   4  -2   1   77.88    3.91 
   4  -2   1   84.23    3.98 
   4  -2   1   82.19    4.21 
  -4  -2  -1   87.16    3.88 
   4   2   1   89.62    4.18 
  -4   2  -1   79.79    4.08 
   4   2   1   80.60    3.93 
   4   2   1   86.79    3.96 
   4   2   1   83.87    4.04 
  -4   2  -1   79.80    3.79 
   4   2   1   81.78    3.95 
   4   2   1   78.87    4.48 
  -4   2  -1   81.50    3.95 
  -4   2  -1   80.33    3.87 
   4   2   1   80.00    3.86 
  -5  -2  -1    5.33    1.28 
   5  -2   1    5.94    1.37 
  -5  -2  -1    7.55    1.34 
   5  -2   1    8.36    1.44 
   5  -2   1    6.44    1.35 
   5  -2   1    8.55    1.40 
  -5  -2  -1    9.00    1.40 
  -5  -2  -1    6.10    1.59 
   5  -2   1    8.53    1.60 
   5  -2   1    8.06    1.79 
   5  -2   1    8.25    1.78 
   5   2   1    7.24    1.69 
   5   2   1    6.51    1.34 
  -5   2  -1    7.90    1.51 
  -5   2  -1    6.69    1.26 
   5   2   1    5.92    1.35 
  -5   2  -1    5.76    1.29 
   5   2   1    8.25    1.42 
   5   2   1    8.93    1.54 
   5   2   1    8.42    1.34 
  -5   2  -1    4.74    1.18 
   5   2   1    8.50    1.83 
  -6  -2  -1   98.61    4.78 
   6  -2   1   89.98    5.24 
  -6  -2  -1   95.24    4.41 
  -6  -2  -1   86.63    4.59 
  -6  -2  -1   83.80    5.00 
   6  -2   1   96.49    4.72 
   6  -2   1   93.04    4.71 
   6  -2   1   88.49    4.84 
  -6  -2  -1   96.17    4.65 
   6  -2   1   90.34    4.52 
   6  -2   1   85.49    4.54 
   6  -2   1   95.53    5.08 
  -6   2  -1   83.96    4.57 
   6   2   1   92.16    4.71 
   6   2   1   94.08    4.74 
  -6   2  -1   97.50    4.97 
  -6   2  -1   90.32    4.67 
   6   2   1   94.62    5.25 
   6   2   1   90.00    4.74 
   6   2   1   88.74    4.53 
  -6   2  -1   88.62    4.55 
   6   2   1   88.88    4.65 
  -6   2  -1   93.92    4.51 
   6   2   1   94.59    5.18 
  -7  -2  -1  176.92    8.64 
   7  -2   1  174.15    8.63 
   7  -2   1  183.33    8.13 
  -7  -2  -1  169.56    8.30 
  -7  -2  -1  193.25    8.31 
   7  -2   1  181.53    8.96 
  -7  -2  -1  181.53    8.32 
   7  -2   1  176.12    8.18 
  -7  -2  -1  188.45    8.01 
   7  -2   1  176.54    8.31 
   7  -2   1  168.75    8.24 
   7  -2   1  176.14    8.49 
   7   2   1  174.98    8.94 
  -7   2  -1  185.72    8.11 
   7   2   1  188.33    8.39 
   7   2   1  183.46    8.28 
   7   2   1  185.64    8.03 
  -7   2  -1  193.78    8.35 
  -7   2  -1  180.61    8.54 
   7   2   1  191.60    9.05 
  -7   2  -1  165.95    8.10 
  -7   2  -1  177.61    8.15 
   7   2   1  170.11    8.24 
   8  -2   1   57.77    4.27 
   8  -2   1   61.82    4.14 
  -8  -2  -1   48.30    3.91 
  -8  -2  -1   54.20    4.65 
  -8  -2  -1   50.60    3.96 
  -8  -2  -1   53.83    4.18 
   8  -2   1   55.06    4.92 
   8  -2   1   58.86    4.59 
   8  -2   1   62.31    4.23 
  -8  -2  -1   61.35    4.28 
  -8   2  -1   57.56    3.88 
   8   2   1   56.94    4.21 
   8   2   1   52.92    4.17 
  -8   2  -1   57.85    4.13 
  -8   2  -1   51.53    4.06 
   8   2   1   54.39    4.71 
  -8   2  -1   48.45    4.41 
   8   2   1   55.93    4.28 
  -8   2  -1   50.75    3.79 
   8   2   1   52.79    4.62 
   8   2   1   57.79    3.77 
  -9  -2  -1   10.51    2.45 
  -9  -2  -1   11.62    2.64 
   9  -2   1   13.45    2.69 
  -9  -2  -1   11.13    2.59 
   9  -2   1   12.22    3.36 
  -9  -2  -1   11.32    2.51 
   9  -2   1    9.14    3.45 
  -9  -2  -1   11.43    3.03 
   9  -2   1    9.06    2.85 
   9  -2   1   14.20    2.71 
  -9   2  -1   13.67    2.54 
  -9   2  -1   10.64    3.17 
  -9   2  -1   11.25    2.60 
  -9   2  -1    4.73    2.17 
   9   2   1   10.80    2.88 
  -9   2  -1   12.73    2.89 
   9   2   1    9.41    2.54 
   9   2   1   12.50    2.64 
  -9   2  -1   10.21    2.74 
   9   2   1   12.89    3.36 
 -10  -2  -1   70.47    6.09 
  10  -2   1   68.53    5.51 
  10  -2   1   64.33    6.48 
 -10  -2  -1   70.72    5.80 
 -10  -2  -1   73.19    6.90 
 -10  -2  -1   71.33    5.86 
  10  -2   1   69.66    5.79 
  10   2   1   67.10    5.80 
 -10   2  -1   64.94    5.86 
 -10   2  -1   69.26    5.68 
 -10   2  -1   69.51    5.78 
 -10   2  -1   73.93    5.97 
  10   2   1   70.61    5.53 
  10   2   1   69.86    6.51 
 -10   2  -1   77.93    6.72 
 -11  -2  -1   40.53    4.86 
 -11  -2  -1   30.92    4.58 
  11  -2   1   20.87    5.23 
 -11  -2  -1   37.74    5.45 
 -11  -2  -1   29.92    4.55 
  11  -2   1   36.81    5.06 
 -11   2  -1   33.33    5.01 
  11   2   1   41.68    4.76 
  11   2   1   42.55    5.03 
 -11   2  -1   41.73    6.00 
 -11   2  -1   33.56    4.67 
 -11   2  -1   41.15    4.61 
  11   2   1   35.97    5.64 
 -12  -2  -1    9.75    3.91 
 -12  -2  -1    9.63    3.98 
  12  -2   1    2.01    4.72 
  12  -2   1   11.13    3.89 
 -12  -2  -1    6.69    3.75 
  12   2   1   10.14    3.88 
 -12   2  -1    8.68    3.92 
  12   2   1    7.53    4.16 
 -12   2  -1    5.91    4.11 
 -12   2  -1   17.59    3.83 
 -12  -3   1    2.37    3.09 
 -12  -3   1    2.84    3.03 
  12  -3  -1   -3.27    3.79 
  12  -3  -1    7.57    3.54 
 -12  -3   1    4.30    3.61 
  12   3  -1   -2.67    4.09 
 -12   3   1    3.74    3.66 
 -12   3   1    1.04    3.09 
  12   3  -1    0.60    3.10 
  11  -3  -1   25.37    4.48 
 -11  -3   1   34.80    4.08 
 -11  -3   1   32.05    3.82 
 -11  -3   1   32.65    4.29 
  11  -3  -1   39.06    5.54 
 -11   3   1   27.77    4.34 
  11   3  -1   30.04    4.57 
 -11   3   1   28.93    4.18 
 -11   3   1   30.20    3.98 
  11   3  -1   31.67    4.32 
  11   3  -1   34.41    4.45 
 -10  -3   1   32.76    4.02 
  10  -3  -1   29.05    3.44 
  10  -3  -1   26.50    3.52 
  10  -3  -1   24.13    3.96 
 -10  -3   1   26.10    3.69 
 -10   3   1   28.37    3.46 
 -10   3   1   24.67    3.52 
  10   3  -1   24.08    3.97 
  10   3  -1   25.46    3.32 
  10   3  -1   27.29    3.65 
 -10   3   1   29.54    3.64 
  -9  -3   1   14.61    2.84 
   9  -3  -1    8.44    2.26 
  -9  -3   1    6.75    2.18 
  -9  -3   1   10.09    2.24 
   9  -3  -1    8.08    2.75 
   9  -3  -1   11.58    2.52 
   9   3  -1    9.32    2.18 
   9   3  -1    9.34    2.45 
  -9   3   1    5.68    2.18 
   9   3  -1    8.72    2.60 
  -9   3   1   12.68    2.56 
   9   3  -1    6.67    2.18 
  -9   3   1    4.42    2.13 
  -8  -3   1    3.61    1.65 
   8  -3  -1    8.44    2.30 
  -8  -3   1    2.23    1.72 
  -8  -3   1    6.48    2.13 
   8  -3  -1    6.99    2.10 
   8  -3  -1    8.30    2.02 
  -8   3   1    6.54    1.98 
  -8   3   1    5.24    1.95 
   8   3  -1    3.87    1.95 
   8   3  -1    3.87    1.74 
  -8   3   1    5.25    1.88 
   8   3  -1    4.04    1.62 
   8   3  -1    5.60    2.09 
   7  -3  -1   28.69    2.71 
   7  -3  -1   23.32    2.45 
  -7  -3   1   28.31    2.56 
  -7  -3   1   24.51    2.76 
   7  -3  -1   26.05    2.83 
  -7  -3   1   28.89    2.46 
  -7   3   1   27.57    2.57 
  -7   3   1   31.60    2.54 
   7   3  -1   32.99    2.80 
   7   3  -1   33.15    2.59 
   7   3  -1   31.49    2.62 
  -7   3   1   30.37    2.71 
   7   3  -1   30.96    2.88 
   6  -3  -1   59.06    3.75 
   6  -3  -1   66.18    3.83 
  -6  -3   1   55.75    3.42 
  -6  -3   1   60.36    3.47 
   6  -3  -1   62.35    3.52 
  -6  -3   1   61.68    3.71 
   6  -3  -1   59.48    3.55 
  -6   3   1   63.33    3.59 
   6   3  -1   62.07    3.60 
   6   3  -1   59.75    3.30 
   6   3  -1   60.05    3.50 
  -6   3   1   63.75    3.49 
  -6   3   1   59.96    3.52 
   6   3  -1   63.73    3.53 
  -5  -3   1   86.30    4.07 
   5  -3  -1   82.75    4.32 
   5  -3  -1   80.99    4.24 
  -5  -3   1   75.04    3.95 
  -5  -3   1   86.14    4.33 
   5  -3  -1   76.67    4.10 
   5   3  -1   81.74    4.08 
  -5   3   1   85.94    4.03 
  -5   3   1   78.69    4.01 
   5   3  -1   78.79    3.84 
  -5   3   1   81.58    4.10 
   5   3  -1   88.94    4.23 
   5   3  -1   81.01    4.05 
  -4  -3   1   48.67    2.67 
   4  -3  -1   45.80    2.91 
   4  -3  -1   46.40    2.73 
  -4  -3   1   47.78    2.63 
  -4  -3   1   49.89    2.88 
   4  -3  -1   47.62    2.84 
  -4   3   1   46.54    2.58 
   4   3  -1   45.68    2.71 
  -4   3   1   43.53    2.65 
  -4   3   1   47.55    2.63 
   4   3  -1   48.52    2.69 
   4   3  -1   48.43    2.48 
   4   3  -1   45.51    2.66 
  -3  -3   1   82.88    3.76 
  -3  -3   1   78.23    3.57 
  -3  -3   1   89.17    3.94 
   3  -3  -1   78.59    3.76 
  -3  -3   1   82.40    3.74 
   3  -3  -1   88.64    3.91 
   3  -3  -1   82.50    3.97 
   3   3  -1   80.84    3.80 
  -3   3   1   81.20    3.67 
   3   3  -1   79.12    3.75 
  -3   3   1   78.56    3.76 
  -3   3   1   78.18    3.71 
   3   3  -1   82.97    3.58 
   3   3  -1   81.04    3.73 
   2  -3  -1    3.28    0.86 
   2  -3  -1    3.81    0.88 
   2  -3  -1    3.41    0.78 
  -2  -3   1    5.49    0.84 
  -2  -3   1    5.10    0.90 
  -2  -3   1    4.86    0.93 
   2  -3  -1    4.10    0.82 
  -2  -3   1    7.82    1.04 
   2  -3  -1    3.78    0.99 
  -2   3   1    5.72    0.80 
  -2   3   1    4.72    0.84 
   2   3  -1    5.53    1.00 
   2   3  -1    4.67    0.86 
  -2   3   1    3.84    0.92 
  -2   3   1    3.18    1.10 
   2   3  -1    5.01    0.79 
  -2   3   1    4.40    0.79 
   2   3  -1    3.68    0.77 
   1  -3  -1   26.04    1.36 
   1  -3  -1   26.66    1.39 
   1  -3  -1   26.31    1.40 
  -1  -3   1   26.80    1.46 
  -1  -3   1   26.88    1.44 
   1  -3  -1   24.73    1.49 
  -1  -3   1   25.76    1.45 
  -1  -3   1   26.38    1.26 
   1  -3  -1   25.93    1.34 
  -1  -3   1   26.77    1.33 
   1  -3  -1   28.41    1.47 
  -1  -3   1   28.51    1.43 
   1  -3  -1   27.44    1.38 
  -1   3   1   26.71    1.58 
   1   3  -1   27.09    1.43 
   1   3  -1   28.97    1.55 
   1   3  -1   26.18    1.39 
   1   3  -1   27.41    1.25 
  -1   3   1   25.88    1.41 
  -1   3   1   25.99    1.38 
   1   3  -1   29.06    1.48 
   1   3  -1   26.94    1.31 
  -1   3   1   29.00    1.49 
  -1   3   1   25.11    1.32 
  -1   3   1   26.12    1.32 
   0  -3  -1   23.35    1.15 
   0  -3  -1   31.02    1.29 
   0  -3   1   29.18    1.44 
   0  -3  -1   30.18    1.44 
   0  -3   1   27.40    1.36 
   0  -3   1   26.99    1.36 
   0  -3   1   28.84    1.22 
   0  -3  -1   27.78    1.35 
   0  -3  -1   25.14    1.33 
   0   3   1   22.63    1.30 
   0   3   1   28.36    1.24 
   0   3   1   24.03    1.28 
   0   3   1   27.16    1.36 
   0   3   1   27.84    1.41 
   0   3  -1   27.65    1.24 
   0   3  -1   27.52    1.40 
   0   3   1   23.69    1.15 
   0   3  -1   24.82    1.33 
   0   3  -1   26.97    1.38 
  -1  -3  -1   56.96    2.55 
  -1  -3  -1   55.43    2.53 
  -1  -3  -1   55.73    2.31 
   1  -3   1   54.62    2.44 
   1  -3   1   56.43    2.66 
  -1  -3  -1   52.76    2.53 
   1  -3   1   53.64    2.57 
   1  -3   1   56.09    2.43 
  -1  -3  -1   56.85    2.32 
  -1  -3  -1   59.49    2.66 
  -1  -3  -1   53.30    2.54 
  -1  -3  -1   53.45    2.41 
  -1  -3  -1   53.03    2.41 
   1  -3   1   52.59    2.46 
   1  -3   1   53.25    2.63 
  -1   3  -1   58.04    2.63 
   1   3   1   54.46    2.42 
   1   3   1   52.79    2.52 
  -1   3  -1   54.89    2.56 
   1   3   1   53.00    2.51 
  -1   3  -1   57.23    2.47 
  -1   3  -1   54.93    2.64 
   1   3   1   57.10    2.53 
  -1   3  -1   54.68    2.64 
   1   3   1   54.88    2.40 
  -1   3  -1   54.21    2.37 
  -1   3  -1   56.90    2.47 
   1   3   1   57.52    2.32 
   1   3   1   58.98    2.67 
   1   3   1   56.83    2.56 
   2  -3   1   79.10    3.64 
   2  -3   1   76.57    3.52 
  -2  -3  -1   79.04    3.56 
  -2  -3  -1   80.89    3.45 
  -2  -3  -1   81.94    3.52 
  -2  -3  -1   74.50    3.62 
   2  -3   1   78.59    3.56 
  -2  -3  -1   75.99    3.46 
   2  -3   1   85.84    3.80 
   2  -3   1   84.28    3.76 
   2  -3   1   78.23    3.46 
   2  -3   1   76.93    3.64 
   2   3   1   86.80    3.53 
   2   3   1   79.70    3.67 
   2   3   1   79.20    3.60 
  -2   3  -1   80.28    3.57 
  -2   3  -1   82.32    3.49 
   2   3   1   78.66    3.53 
   2   3   1   85.34    3.99 
   2   3   1   78.97    3.49 
   2   3   1   82.41    3.61 
  -2   3  -1   81.76    3.80 
  -2   3  -1   80.94    3.56 
   2   3   1   80.40    3.47 
   3  -3   1   -0.29    1.05 
   3  -3   1    1.14    1.17 
   3  -3   1    0.20    0.87 
   3  -3   1    1.52    0.94 
   3  -3   1    0.61    1.12 
  -3  -3  -1    1.55    0.83 
  -3  -3  -1   -0.40    0.92 
  -3  -3  -1    1.74    0.97 
   3  -3   1    1.72    0.98 
   3  -3   1    2.51    1.10 
   3   3   1    0.94    1.00 
   3   3   1    1.50    0.88 
   3   3   1    0.70    0.96 
   3   3   1    0.35    1.09 
   3   3   1    0.81    1.29 
   3   3   1    0.85    0.90 
  -3   3  -1    0.15    0.85 
   3   3   1    2.79    0.98 
  -3   3  -1    1.79    1.00 
  -3   3  -1    0.97    0.88 
  -3   3  -1    0.96    1.03 
   4  -3   1   42.39    2.58 
   4  -3   1   50.95    3.04 
   4  -3   1   38.92    2.77 
  -4  -3  -1   42.05    2.58 
   4  -3   1   44.11    2.51 
   4  -3   1   42.32    2.82 
  -4  -3  -1   38.14    2.83 
   4  -3   1   42.46    2.50 
  -4  -3  -1   41.85    2.42 
   4  -3   1   42.12    2.60 
  -4  -3  -1   43.16    2.43 
   4   3   1   50.57    3.22 
   4   3   1   39.33    2.68 
   4   3   1   44.43    2.60 
   4   3   1   43.23    2.47 
  -4   3  -1   43.14    2.60 
   4   3   1   40.16    2.47 
   4   3   1   42.86    2.57 
   4   3   1   47.04    2.73 
  -4   3  -1   43.07    2.60 
  -4   3  -1   44.04    2.45 
   5  -3   1  126.16    5.75 
   5  -3   1  129.42    6.05 
  -5  -3  -1  125.34    6.15 
   5  -3   1  125.76    6.23 
   5  -3   1  124.52    6.00 
  -5  -3  -1  127.84    5.66 
   5  -3   1  126.33    5.71 
  -5  -3  -1  128.09    5.78 
   5  -3   1  125.74    5.69 
  -5  -3  -1  126.44    5.58 
   5  -3   1  126.96    5.80 
   5   3   1  124.75    5.60 
   5   3   1  132.41    6.11 
   5   3   1  135.24    5.80 
   5   3   1  127.49    5.85 
  -5   3  -1  127.51    5.70 
   5   3   1  118.06    5.75 
   5   3   1  120.26    6.24 
  -5   3  -1  124.76    5.61 
   5   3   1  127.86    5.70 
  -5   3  -1  126.96    5.82 
  -5   3  -1  128.69    5.93 
  -6  -3  -1   11.38    2.04 
  -6  -3  -1   13.20    1.76 
   6  -3   1   12.61    2.09 
   6  -3   1   16.24    2.32 
  -6  -3  -1   12.26    1.63 
  -6  -3  -1    9.38    1.66 
   6  -3   1   16.21    1.85 
  -6  -3  -1   13.79    1.79 
   6  -3   1   14.46    2.21 
   6  -3   1   16.30    1.94 
   6  -3   1   11.55    1.73 
   6  -3   1   10.65    1.76 
   6   3   1   14.58    1.84 
   6   3   1   12.29    1.65 
   6   3   1   10.80    2.03 
  -6   3  -1   15.44    1.73 
   6   3   1   14.49    2.38 
  -6   3  -1   15.81    2.02 
  -6   3  -1   15.35    1.72 
   6   3   1   12.42    1.80 
  -6   3  -1   14.54    1.85 
   6   3   1   11.88    1.82 
   7  -3   1   39.08    3.65 
   7  -3   1   38.84    3.28 
   7  -3   1   35.70    3.13 
  -7  -3  -1   35.78    3.07 
   7  -3   1   33.42    3.06 
  -7  -3  -1   35.51    3.02 
  -7  -3  -1   34.60    2.76 
   7  -3   1   37.19    3.03 
  -7  -3  -1   34.84    3.42 
  -7  -3  -1   31.51    2.94 
   7  -3   1   39.55    3.04 
   7  -3   1   41.91    3.41 
  -7   3  -1   36.09    2.87 
  -7   3  -1   34.51    2.87 
  -7   3  -1   41.16    3.10 
   7   3   1   34.60    3.04 
   7   3   1   39.99    2.92 
   7   3   1   36.79    3.21 
  -7   3  -1   40.18    3.46 
   7   3   1   38.79    3.12 
  -7   3  -1   35.23    2.98 
   7   3   1   36.98    3.72 
   7   3   1   41.79    3.82 
  -8  -3  -1   40.86    3.48 
  -8  -3  -1   40.50    3.29 
   8  -3   1   35.78    4.23 
  -8  -3  -1   36.17    3.00 
   8  -3   1   42.93    3.86 
  -8  -3  -1   38.51    3.38 
   8  -3   1   39.97    3.48 
   8  -3   1   41.42    3.59 
  -8  -3  -1   38.05    3.79 
   8  -3   1   37.38    3.29 
   8  -3   1   40.01    3.37 
  -8   3  -1   44.15    3.76 
   8   3   1   39.67    3.34 
   8   3   1   38.05    4.18 
  -8   3  -1   40.57    3.34 
  -8   3  -1   37.97    3.35 
   8   3   1   38.93    4.14 
  -8   3  -1   46.81    4.40 
   8   3   1   42.25    3.72 
  -8   3  -1   33.87    3.02 
  -8   3  -1   33.42    3.24 
   8   3   1   38.44    3.36 
   9  -3   1   28.98    4.44 
  -9  -3  -1   41.67    3.84 
   9  -3   1   37.86    3.74 
   9  -3   1   36.39    4.04 
  -9  -3  -1   31.58    3.50 
   9  -3   1   36.17    3.59 
   9  -3   1   32.52    3.60 
  -9  -3  -1   34.03    3.45 
  -9  -3  -1   31.60    4.17 
   9   3   1   39.86    4.62 
  -9   3  -1   30.68    3.36 
   9   3   1   33.60    3.86 
  -9   3  -1   27.52    3.55 
   9   3   1   33.86    3.63 
  -9   3  -1   35.84    4.86 
  -9   3  -1   32.26    3.23 
  -9   3  -1   35.08    4.38 
  10  -3   1   16.55    3.54 
 -10  -3  -1   14.28    3.50 
  10  -3   1   17.04    4.00 
 -10  -3  -1   11.51    3.28 
 -10  -3  -1   15.19    2.97 
 -10  -3  -1   14.11    3.21 
 -10  -3  -1   15.80    3.08 
  10  -3   1   13.38    3.41 
  10   3   1    9.24    3.63 
 -10   3  -1   21.55    3.40 
  10   3   1   12.78    3.43 
 -10   3  -1   14.32    3.39 
 -10   3  -1   13.45    3.25 
 -10   3  -1   13.72    4.16 
 -10   3  -1   16.46    2.99 
  10   3   1   19.66    3.21 
 -11  -3  -1    3.47    2.82 
 -11  -3  -1    3.64    3.29 
  11  -3   1    6.91    3.83 
 -11  -3  -1    2.84    3.14 
  11  -3   1    6.36    4.06 
 -11   3  -1    5.92    3.87 
 -11   3  -1    7.56    3.65 
 -11   3  -1    3.33    2.94 
  11   3   1    1.73    4.04 
  11   3   1   -0.70    3.18 
  11   3   1    4.16    3.17 
  12  -3   1   13.37    5.16 
 -12  -3  -1    8.22    4.39 
  12  -3   1    7.72    5.09 
 -12  -3  -1    7.18    3.73 
 -12   3  -1   13.17    3.86 
  12   3   1   10.37    4.50 
 -12   3  -1   13.40    4.03 
  12   3   1    7.05    4.67 
 -12   3  -1   10.34    4.33 
 -12  -4   1    6.37    3.59 
  12  -4  -1   11.17    4.48 
 -12  -4   1   14.85    3.73 
 -12  -4   1   16.69    3.84 
  12  -4  -1   12.76    3.71 
 -12   4   1   16.50    4.03 
  12   4  -1   12.32    3.98 
  12   4  -1   13.18    4.89 
  12   4  -1    7.69    3.46 
 -12   4   1    7.95    3.47 
 -11  -4   1   -1.58    2.95 
  11  -4  -1    7.57    3.00 
 -11  -4   1    6.24    2.89 
 -11  -4   1    4.93    3.10 
  11  -4  -1    7.34    3.55 
 -11   4   1    4.34    2.69 
 -11   4   1    4.38    2.99 
  11   4  -1    5.15    2.72 
 -11   4   1    2.07    2.50 
  11   4  -1    4.76    3.12 
  11   4  -1    1.98    3.28 
 -10  -4   1    4.69    2.60 
 -10  -4   1    7.69    2.88 
  10  -4  -1    1.94    2.49 
  10  -4  -1    1.91    3.00 
  10  -4  -1    4.74    2.87 
 -10   4   1    0.34    2.25 
 -10   4   1   -0.34    2.41 
  10   4  -1    4.82    2.38 
 -10   4   1    2.47    2.46 
  10   4  -1    5.65    3.24 
  10   4  -1    2.43    2.61 
  -9  -4   1   -0.01    1.72 
  -9  -4   1    5.64    2.50 
   9  -4  -1    2.12    2.31 
   9  -4  -1    5.58    2.74 
  -9  -4   1    1.05    2.00 
   9  -4  -1    1.76    2.02 
   9   4  -1    1.05    2.09 
  -9   4   1    2.66    2.08 
   9   4  -1    0.02    1.98 
  -9   4   1    1.40    1.97 
  -9   4   1    2.26    1.99 
   9   4  -1    3.66    2.65 
  -8  -4   1    0.00    1.90 
   8  -4  -1    3.43    2.31 
  -8  -4   1   -0.01    1.62 
   8  -4  -1    4.15    1.75 
  -8  -4   1    0.89    1.66 
   8  -4  -1   -0.65    1.79 
   8   4  -1    0.98    1.90 
  -8   4   1    4.72    1.85 
  -8   4   1    4.81    1.89 
   8   4  -1   -0.66    1.56 
   8   4  -1    1.23    1.80 
  -8   4   1   -1.18    1.63 
   8   4  -1    0.59    1.44 
   7  -4  -1    1.83    1.57 
   7  -4  -1    3.28    1.73 
  -7  -4   1    4.03    1.71 
  -7  -4   1    2.29    1.45 
  -7  -4   1    1.18    1.39 
   7  -4  -1    2.55    1.79 
  -7   4   1    1.68    1.45 
   7   4  -1    1.59    1.44 
   7   4  -1    1.10    1.63 
  -7   4   1    1.75    1.45 
   7   4  -1    2.96    1.31 
   7   4  -1    4.06    1.68 
  -7   4   1    0.95    1.52 
   6  -4  -1    5.98    1.70 
   6  -4  -1    4.09    1.41 
   6  -4  -1    7.64    1.71 
  -6  -4   1    2.50    1.30 
  -6  -4   1    4.90    1.55 
  -6  -4   1    2.97    1.26 
  -6   4   1    5.47    1.43 
  -6   4   1    6.66    1.44 
   6   4  -1    3.28    1.33 
   6   4  -1    3.78    1.44 
  -6   4   1    4.71    1.44 
   6   4  -1    4.42    1.35 
   6   4  -1    4.32    1.11 
  -5  -4   1   21.60    1.84 
  -5  -4   1   22.45    2.20 
   5  -4  -1   20.24    2.13 
   5  -4  -1   15.67    1.75 
   5  -4  -1   17.10    1.97 
  -5  -4   1   19.81    1.83 
   5   4  -1   21.85    1.89 
  -5   4   1   15.29    1.64 
   5   4  -1   18.89    1.79 
   5   4  -1   21.26    1.95 
  -5   4   1   19.52    1.84 
   5   4  -1   19.77    1.52 
  -5   4   1   16.23    1.71 
   4  -4  -1   61.41    3.55 
  -4  -4   1   66.56    3.27 
  -4  -4   1   65.10    3.23 
   4  -4  -1   62.14    3.31 
  -4  -4   1   68.52    3.49 
   4  -4  -1   60.85    3.38 
  -4   4   1   63.51    3.30 
   4   4  -1   65.07    3.31 
   4   4  -1   61.15    3.21 
   4   4  -1   59.30    3.24 
  -4   4   1   63.15    3.21 
  -4   4   1   63.75    3.15 
  -3  -4   1   19.83    1.70 
   3  -4  -1   16.47    1.57 
   3  -4  -1   12.97    1.60 
  -3  -4   1   20.64    1.69 
   3  -4  -1   13.81    1.32 
  -3   4   1   12.75    1.21 
   3   4  -1   13.62    1.38 
  -3   4   1   15.25    1.38 
  -3   4   1   13.03    1.28 
   3   4  -1   12.52    1.33 
   3   4  -1   15.21    1.31 
  -2  -4   1   16.11    1.41 
   2  -4  -1   15.39    1.30 
  -2  -4   1   17.42    1.53 
   2  -4  -1   18.51    1.32 
   2  -4  -1   16.81    1.55 
   2  -4  -1   15.60    1.38 
   2  -4  -1   17.32    1.49 
  -2  -4   1   20.40    1.67 
  -2   4   1   17.49    1.26 
   2   4  -1   21.25    1.52 
  -2   4   1   16.87    1.24 
  -2   4   1   21.06    1.44 
   2   4  -1   17.37    1.38 
   2   4  -1   16.56    1.43 
  -2   4   1   16.70    1.23 
   2   4  -1   16.33    1.38 
   1  -4  -1    1.25    0.53 
   1  -4  -1    2.79    0.84 
  -1  -4   1    0.32    0.71 
   1  -4  -1    0.51    0.53 
  -1  -4   1    0.22    0.61 
   1  -4  -1    0.90    0.59 
   1  -4  -1   -0.42    0.77 
   1  -4  -1    0.51    0.59 
  -1  -4   1    0.62    0.63 
  -1  -4   1    1.96    0.68 
  -1  -4   1    1.57    0.52 
  -1  -4   1    1.21    0.65 
  -1   4   1    1.21    0.59 
   1   4  -1    3.43    0.84 
  -1   4   1   -0.66    0.79 
  -1   4   1    0.58    0.54 
   1   4  -1    0.96    0.62 
   1   4  -1    0.96    0.50 
   1   4  -1    2.21    0.67 
  -1   4   1    3.25    0.85 
   1   4  -1    1.77    0.65 
  -1   4   1    0.88    0.52 
   1   4  -1    2.36    0.66 
  -1   4   1    0.10    0.58 
  -1   4   1    1.15    0.51 
   0  -4  -1   29.26    1.44 
   0  -4   1   30.23    1.60 
   0  -4  -1   25.96    1.37 
   0  -4   1   27.17    1.42 
   0  -4   1   26.26    1.28 
   0  -4  -1   28.65    1.42 
   0  -4  -1   24.45    1.47 
   0  -4  -1   26.47    1.43 
   0  -4   1   27.69    1.46 
   0  -4   1   25.31    1.46 
   0  -4  -1   25.18    1.20 
   0  -4  -1   28.51    1.56 
   0  -4   1   30.17    1.52 
   0  -4  -1   26.62    1.41 
   0   4   1   27.54    1.47 
   0   4  -1   27.41    1.45 
   0   4   1   25.31    1.40 
   0   4  -1   28.55    1.52 
   0   4   1   29.52    1.38 
   0   4  -1   27.45    1.43 
   0   4   1   22.32    1.19 
   0   4  -1   28.08    1.52 
   0   4  -1   30.10    1.50 
   0   4   1   27.77    1.41 
   0   4   1   27.27    1.51 
   0   4   1   27.98    1.40 
   0   4   1   28.36    1.53 
   1  -4   1   70.51    3.31 
   1  -4   1   69.25    3.08 
  -1  -4  -1   69.82    3.14 
   1  -4   1   72.30    3.09 
   1  -4   1   70.30    2.97 
  -1  -4  -1   74.69    3.20 
  -1  -4  -1   71.36    3.01 
  -1  -4  -1   71.40    3.26 
   1  -4   1   69.64    3.33 
  -1  -4  -1   61.10    2.86 
  -1  -4  -1   70.62    3.17 
  -1  -4  -1   70.81    3.16 
   1   4   1   77.29    3.33 
  -1   4  -1   70.05    3.26 
   1   4   1   70.15    3.17 
  -1   4  -1   74.72    3.21 
   1   4   1   71.61    3.18 
   1   4   1   69.65    3.06 
   1   4   1   70.76    3.16 
  -1   4  -1   77.94    3.36 
  -1   4  -1   69.06    3.22 
  -1   4  -1   74.09    3.12 
   1   4   1   71.44    3.02 
  -1   4  -1   70.45    2.93 
  -2  -4  -1    3.84    0.76 
   2  -4   1    3.28    0.87 
   2  -4   1    4.69    1.10 
   2  -4   1    2.45    0.77 
  -2  -4  -1    4.90    0.97 
   2  -4   1    3.30    1.10 
   2  -4   1    3.72    0.91 
  -2  -4  -1    4.42    0.90 
   2  -4   1    3.68    0.77 
   2  -4   1    4.37    0.93 
   2  -4   1    3.73    1.09 
  -2  -4  -1    4.52    0.98 
  -2  -4  -1    4.84    0.85 
  -2  -4  -1    4.62    0.73 
   2   4   1    3.92    0.92 
  -2   4  -1    6.11    1.12 
   2   4   1    3.23    0.82 
   2   4   1    3.23    0.78 
  -2   4  -1    2.43    0.75 
   2   4   1    5.93    1.10 
  -2   4  -1    3.38    0.72 
  -2   4  -1    2.55    0.68 
   2   4   1    6.24    0.81 
  -2   4  -1    3.38    0.79 
   2   4   1    4.95    1.30 
  -2   4  -1    3.88    0.86 
  -3  -4  -1   75.51    3.38 
  -3  -4  -1   72.37    3.65 
   3  -4   1   70.90    3.46 
   3  -4   1   74.90    3.81 
   3  -4   1   74.38    3.61 
  -3  -4  -1   75.12    3.62 
   3  -4   1   76.06    3.90 
  -3  -4  -1   70.28    3.47 
   3  -4   1   74.54    3.62 
   3  -4   1   77.58    3.47 
   3  -4   1   75.04    3.60 
  -3   4  -1   74.37    3.47 
   3   4   1   79.47    3.40 
  -3   4  -1   75.06    3.56 
   3   4   1   82.76    4.12 
  -3   4  -1   75.72    3.79 
   3   4   1   82.70    3.59 
   3   4   1   77.11    3.62 
  -3   4  -1   78.91    3.61 
   3   4   1   72.96    3.54 
   3   4   1   74.19    3.69 
   4  -4   1   23.25    2.06 
   4  -4   1   20.76    1.68 
   4  -4   1   20.98    2.05 
  -4  -4  -1   24.93    1.94 
   4  -4   1   21.71    1.85 
   4  -4   1   23.52    1.99 
   4  -4   1   23.33    2.25 
  -4  -4  -1   18.79    1.74 
  -4  -4  -1   24.13    2.18 
  -4  -4  -1   23.73    1.70 
   4  -4   1   21.70    1.86 
  -4   4  -1   21.78    1.92 
   4   4   1   24.57    1.88 
   4   4   1   17.36    1.68 
  -4   4  -1   19.86    2.09 
  -4   4  -1   23.65    1.94 
   4   4   1   22.48    1.93 
   4   4   1   27.54    2.50 
  -4   4  -1   21.38    1.80 
   4   4   1   22.84    1.97 
   4   4   1   22.88    1.77 
   5  -4   1    2.15    1.31 
   5  -4   1    2.01    1.20 
   5  -4   1    1.61    1.48 
  -5  -4  -1    2.26    1.50 
   5  -4   1    6.06    1.31 
   5  -4   1    0.40    1.20 
  -5  -4  -1    2.19    1.06 
   5  -4   1   -0.94    1.37 
  -5  -4  -1    3.35    1.29 
   5  -4   1    2.01    1.39 
  -5  -4  -1    3.37    1.13 
   5   4   1    2.55    1.18 
  -5   4  -1    2.11    1.13 
  -5   4  -1    0.86    0.98 
   5   4   1    2.97    1.28 
   5   4   1    0.92    1.58 
  -5   4  -1    1.41    1.26 
   5   4   1    3.17    1.42 
  -5   4  -1    1.80    1.20 
   5   4   1    2.24    1.43 
   5   4   1    3.82    1.13 
  -6  -4  -1   21.50    1.90 
   6  -4   1   18.86    2.09 
   6  -4   1   20.51    2.11 
   6  -4   1   20.13    2.37 
  -6  -4  -1   18.61    1.86 
  -6  -4  -1   14.54    2.31 
   6  -4   1   18.90    2.32 
  -6  -4  -1   21.18    2.21 
   6  -4   1   18.26    1.99 
   6  -4   1   16.88    2.03 
   6  -4   1   18.72    2.60 
   6   4   1   18.95    2.03 
   6   4   1   23.40    2.44 
   6   4   1   20.24    2.11 
   6   4   1   18.90    1.93 
   6   4   1   16.85    2.51 
  -6   4  -1   23.20    2.24 
  -6   4  -1   19.98    1.89 
  -6   4  -1   18.22    1.93 
  -6   4  -1   19.51    2.10 
   7  -4   1    6.85    1.87 
  -7  -4  -1    6.90    2.24 
  -7  -4  -1    6.28    1.85 
   7  -4   1    8.75    2.13 
   7  -4   1   11.44    2.19 
  -7  -4  -1    8.61    1.77 
   7  -4   1    8.84    1.79 
   7  -4   1    6.43    1.88 
  -7  -4  -1    8.26    1.68 
   7  -4   1   10.49    2.57 
  -7  -4  -1    8.48    1.94 
  -7   4  -1   10.12    1.76 
   7   4   1    9.71    1.81 
  -7   4  -1    9.34    1.85 
   7   4   1    8.03    2.37 
  -7   4  -1    8.62    2.01 
   7   4   1    8.88    1.94 
  -7   4  -1    6.13    2.28 
   7   4   1    7.85    2.39 
   7   4   1    5.91    1.89 
  -7   4  -1    8.91    1.82 
   8  -4   1    1.62    1.94 
  -8  -4  -1    1.06    1.64 
  -8  -4  -1    3.97    2.03 
   8  -4   1    1.30    2.23 
  -8  -4  -1    2.54    2.30 
   8  -4   1    3.42    2.07 
  -8  -4  -1    8.81    2.24 
   8  -4   1    4.72    2.51 
   8  -4   1    5.66    2.11 
  -8  -4  -1    4.93    1.94 
   8  -4   1    7.42    2.11 
  -8   4  -1    3.00    2.52 
  -8   4  -1    3.28    1.99 
  -8   4  -1    3.45    2.15 
  -8   4  -1    1.71    1.81 
   8   4   1    1.66    2.53 
  -8   4  -1    0.55    2.07 
   8   4   1    0.94    1.88 
  -8   4  -1    1.93    1.84 
   8   4   1    5.28    2.12 
   8   4   1    4.89    2.08 
   8   4   1    6.14    2.78 
  -9  -4  -1    0.74    2.18 
   9  -4   1   -0.78    2.30 
   9  -4   1    1.63    2.76 
  -9  -4  -1    1.33    2.06 
   9  -4   1    1.16    2.54 
   9  -4   1    1.95    2.29 
  -9  -4  -1    3.71    2.75 
   9   4   1    4.03    2.61 
  -9   4  -1    2.38    2.97 
  -9   4  -1    2.77    2.36 
  -9   4  -1    0.90    2.31 
  -9   4  -1    3.42    2.18 
  -9   4  -1    2.38    2.79 
   9   4   1    5.60    2.35 
   9   4   1    2.03    2.98 
  10  -4   1   -2.78    2.94 
  10  -4   1    3.10    2.70 
 -10  -4  -1    2.46    2.74 
 -10  -4  -1   -0.69    2.49 
 -10  -4  -1   -3.35    2.58 
 -10  -4  -1    3.76    2.38 
  10  -4   1    9.64    3.89 
 -10   4  -1    4.06    3.37 
 -10   4  -1    2.55    2.54 
  10   4   1    1.85    2.86 
  10   4   1    5.24    2.67 
 -10   4  -1    1.24    2.87 
 -10   4  -1   -1.20    2.31 
  10   4   1   11.92    3.54 
  11  -4   1    2.58    3.62 
 -11  -4  -1    6.94    3.00 
 -11  -4  -1   11.45    3.61 
  11  -4   1    3.20    4.13 
 -11  -4  -1    4.08    3.32 
  11   4   1    5.46    3.07 
 -11   4  -1    6.82    3.97 
  11   4   1    8.80    3.95 
 -11   4  -1    4.83    3.02 
 -11   4  -1    2.79    3.62 
  12  -4   1    3.87    4.23 
 -12  -4  -1    3.28    3.49 
 -12  -4  -1    9.03    3.69 
  12  -4   1    4.88    4.92 
  12   4   1    3.90    3.59 
 -12   4  -1    5.37    3.58 
 -12   4  -1   -1.02    4.73 
 -12   4  -1    2.69    4.06 
  12  -5  -1   -2.82    3.09 
  12  -5  -1    2.88    4.14 
 -12  -5   1   -2.77    3.24 
 -12  -5   1    8.29    3.43 
 -12  -5   1    3.45    2.97 
  12   5  -1    5.61    3.22 
  12   5  -1   -0.81    3.83 
 -12   5   1    3.65    4.00 
  12   5  -1    6.03    3.63 
  11  -5  -1   30.74    4.12 
 -11  -5   1   29.85    4.26 
  11  -5  -1   22.64    4.68 
 -11  -5   1   33.96    4.22 
  11  -5  -1   32.28    4.42 
 -11   5   1   30.49    3.88 
  11   5  -1   30.24    4.78 
  11   5  -1   35.59    4.34 
 -11   5   1   30.48    4.28 
 -11   5   1   31.32    3.97 
  11   5  -1   36.55    4.23 
  10  -5  -1   80.39    6.08 
  10  -5  -1   73.98    5.50 
  10  -5  -1   76.73    6.58 
 -10  -5   1   81.02    5.93 
 -10  -5   1   62.90    5.05 
 -10  -5   1   79.78    5.67 
  10   5  -1   82.02    5.47 
 -10   5   1   68.86    5.18 
  10   5  -1   87.19    6.33 
  10   5  -1   68.94    5.71 
 -10   5   1   84.24    5.66 
 -10   5   1   82.72    5.48 
  -9  -5   1   52.80    4.55 
   9  -5  -1   48.18    4.07 
   9  -5  -1   42.30    3.88 
  -9  -5   1   42.61    3.82 
  -9  -5   1   43.93    3.68 
   9  -5  -1   38.72    4.39 
  -9   5   1   44.78    3.81 
  -9   5   1   43.66    3.85 
  -9   5   1   40.50    3.77 
   9   5  -1   49.42    4.63 
   9   5  -1   42.61    3.70 
   9   5  -1   48.90    3.98 
  -8  -5   1   11.18    2.11 
  -8  -5   1    7.12    1.86 
   8  -5  -1    8.94    2.03 
  -8  -5   1   11.73    2.43 
   8  -5  -1   11.71    2.36 
   8  -5  -1    8.08    2.33 
  -8   5   1    9.98    2.05 
   8   5  -1    8.79    2.19 
   8   5  -1   15.13    2.18 
  -8   5   1    9.61    2.09 
   8   5  -1   11.73    1.81 
  -8   5   1    8.49    2.00 
   8   5  -1   12.32    2.49 
  -7  -5   1  131.53    6.36 
   7  -5  -1  133.48    6.86 
  -7  -5   1  126.38    6.29 
  -7  -5   1  132.51    6.77 
   7  -5  -1  136.89    6.42 
   7  -5  -1  124.73    6.59 
  -7   5   1  136.81    6.41 
   7   5  -1  138.92    6.38 
  -7   5   1  130.72    6.45 
  -7   5   1  130.27    6.32 
   7   5  -1  133.85    6.07 
   7   5  -1  124.26    6.41 
   7   5  -1  142.09    6.72 
   6  -5  -1  139.67    6.78 
   6  -5  -1  139.44    6.74 
  -6  -5   1  135.80    6.44 
  -6  -5   1  141.91    6.81 
   6  -5  -1  141.18    6.51 
  -6  -5   1  138.80    6.49 
  -6   5   1  138.71    6.41 
   6   5  -1  146.78    6.59 
   6   5  -1  141.06    6.50 
   6   5  -1  143.26    6.51 
  -6   5   1  146.95    6.58 
  -6   5   1  140.25    6.43 
  -5  -5   1   46.20    3.07 
   5  -5  -1   47.67    2.87 
   5  -5  -1   44.83    3.01 
  -5  -5   1   46.43    2.84 
  -5  -5   1   45.36    2.77 
   5  -5  -1   43.74    3.28 
   5   5  -1   45.05    2.82 
  -5   5   1   43.83    2.62 
  -5   5   1   46.70    2.89 
  -5   5   1   45.63    2.73 
   5   5  -1   41.17    2.77 
   5   5  -1   45.45    2.83 
  -4  -5   1   27.11    2.08 
   4  -5  -1   28.38    2.33 
   4  -5  -1   25.64    2.25 
   4  -5  -1   24.67    1.81 
  -4  -5   1   27.32    2.24 
   4  -5  -1   23.47    2.04 
  -4   5   1   24.02    2.05 
  -4   5   1   25.78    1.94 
   4   5  -1   23.09    2.02 
   4   5  -1   24.62    1.97 
  -4   5   1   24.99    1.79 
   4   5  -1   23.59    1.99 
   3  -5  -1  145.29    6.17 
  -3  -5   1  158.62    6.52 
  -3  -5   1  153.95    6.37 
   3  -5  -1  150.03    6.54 
   3  -5  -1  153.62    6.49 
   3  -5  -1  141.46    6.26 
   3   5  -1  148.93    6.27 
  -3   5   1  151.54    6.32 
  -3   5   1  137.02    6.15 
   3   5  -1  148.18    6.29 
  -3   5   1  155.12    6.28 
   3   5  -1  142.36    6.28 
  -3   5   1  142.77    6.21 
  -2  -5   1  237.06    9.55 
  -2  -5   1  252.97    9.59 
   2  -5  -1  229.53    9.44 
   2  -5  -1  228.66    9.53 
   2  -5  -1  228.39    9.61 
  -2  -5   1  238.51    9.46 
   2  -5  -1  225.54    9.43 
   2  -5  -1  218.89    9.34 
   2   5  -1  237.55    9.42 
  -2   5   1  225.82    9.44 
  -2   5   1  231.83    9.33 
  -2   5   1  231.68    9.42 
   2   5  -1  240.11    9.47 
   2   5  -1  236.09    9.48 
  -2   5   1  239.15    9.48 
  -1  -5   1    7.32    0.90 
  -1  -5   1    8.69    0.75 
   1  -5  -1   10.62    1.16 
  -1  -5   1    6.99    1.04 
   1  -5  -1    7.62    0.80 
   1  -5  -1    6.66    0.80 
  -1  -5   1    6.81    0.92 
   1  -5  -1    6.58    1.03 
   1  -5  -1    7.07    0.72 
  -1  -5   1    7.30    0.88 
   1  -5  -1    7.26    0.87 
  -1  -5   1    8.74    0.93 
   1   5  -1    6.17    0.92 
   1   5  -1    7.21    0.74 
  -1   5   1    7.66    0.79 
   1   5  -1    7.31    0.89 
  -1   5   1    7.83    1.13 
  -1   5   1    9.58    1.11 
   1   5  -1    7.53    0.87 
   1   5  -1    7.69    0.91 
  -1   5   1    6.17    0.80 
  -1   5   1    7.12    0.71 
   1   5  -1   10.27    1.11 
  -1   5   1    8.17    0.89 
   0  -5   1   10.99    0.82 
   0  -5   1   10.31    0.94 
   0  -5   1   11.30    0.98 
   0  -5  -1   11.55    1.04 
   0  -5   1    8.34    0.95 
   0  -5  -1   10.04    0.88 
   0  -5   1   10.98    0.92 
   0  -5  -1   11.10    0.90 
   0  -5   1   10.78    1.02 
   0  -5  -1    9.57    0.84 
   0  -5  -1   12.14    0.91 
   0  -5  -1    9.10    0.99 
   0  -5  -1    9.23    0.69 
   0  -5  -1    9.68    0.92 
   0   5   1   11.87    0.94 
   0   5   1   10.99    1.03 
   0   5  -1    8.09    0.86 
   0   5  -1    9.89    0.90 
   0   5   1    9.46    0.68 
   0   5   1   11.05    1.04 
   0   5  -1   11.67    1.07 
   0   5  -1   12.83    1.00 
   0   5   1   12.64    1.05 
   0   5   1    9.23    0.83 
   0   5  -1    9.91    1.00 
   0   5   1    9.14    0.87 
   0   5   1   11.01    0.87 
   1  -5   1  284.35   11.63 
  -1  -5  -1  279.52   11.64 
   1  -5   1  301.66   11.89 
  -1  -5  -1  294.13   11.60 
   1  -5   1  296.56   11.49 
  -1  -5  -1  293.42   11.67 
   1  -5   1  289.73   11.69 
   1  -5   1  278.25   11.58 
   1  -5   1  296.62   11.75 
  -1  -5  -1  303.64   11.96 
  -1  -5  -1  283.67   11.52 
  -1  -5  -1  319.94   11.86 
   1   5   1  277.29   11.52 
   1   5   1  293.42   11.68 
  -1   5  -1  263.63   12.10 
   1   5   1  312.75   11.85 
   1   5   1  305.48   11.72 
  -1   5  -1  293.08   11.83 
   1   5   1  286.32   11.65 
  -1   5  -1  294.09   11.66 
   1   5   1  289.17   11.59 
  -1   5  -1  282.20   11.45 
  -2  -5  -1  192.28    7.73 
   2  -5   1  193.09    8.13 
  -2  -5  -1  185.05    7.84 
   2  -5   1  188.48    7.80 
  -2  -5  -1  197.75    7.95 
   2  -5   1  189.84    7.79 
   2  -5   1  189.72    7.94 
   2  -5   1  190.27    8.05 
  -2  -5  -1  176.05    7.68 
  -2  -5  -1  191.77    7.71 
  -2   5  -1  189.08    7.74 
   2   5   1  189.51    7.71 
  -2   5  -1  195.60    8.10 
   2   5   1  199.24    7.74 
   2   5   1  196.76    7.93 
   2   5   1  194.70    7.84 
   2   5   1  197.43    8.21 
  -2   5  -1  194.08    7.89 
   2   5   1  197.60    7.97 
  -2   5  -1  191.76    7.74 
   3  -5   1    1.05    0.92 
  -3  -5  -1    0.49    0.74 
   3  -5   1    1.01    1.00 
   3  -5   1    1.84    1.15 
   3  -5   1    1.04    1.25 
  -3  -5  -1    1.50    0.93 
  -3  -5  -1    2.68    1.08 
  -3  -5  -1    2.54    0.90 
   3  -5   1    0.66    1.26 
   3  -5   1    0.86    0.98 
  -3   5  -1    1.93    0.87 
   3   5   1    1.34    1.40 
   3   5   1    1.89    0.91 
   3   5   1    1.56    0.77 
   3   5   1    2.64    0.94 
  -3   5  -1    1.26    0.93 
  -3   5  -1    1.73    0.88 
  -3   5  -1    0.96    1.10 
   3   5   1    1.71    1.05 
   3   5   1    2.41    1.18 
   4  -5   1   88.43    4.27 
  -4  -5  -1   86.83    3.95 
  -4  -5  -1   94.20    4.31 
  -4  -5  -1   88.57    4.62 
   4  -5   1   86.40    4.04 
   4  -5   1   85.76    4.12 
   4  -5   1   89.28    4.28 
   4  -5   1   84.98    4.52 
  -4  -5  -1   87.68    4.07 
   4  -5   1   91.27    4.66 
   4  -5   1   92.11    4.28 
   4   5   1   89.23    4.00 
   4   5   1   90.49    4.36 
  -4   5  -1   90.10    4.09 
   4   5   1   88.03    4.20 
   4   5   1   96.08    4.34 
   4   5   1   83.08    4.25 
  -4   5  -1   88.99    4.67 
  -4   5  -1   88.61    4.26 
   4   5   1   88.22    4.80 
  -4   5  -1   86.20    4.16 
   5  -5   1  191.74    8.35 
  -5  -5  -1  194.20    8.44 
   5  -5   1  190.19    8.72 
  -5  -5  -1  192.79    8.84 
   5  -5   1  196.23    8.82 
   5  -5   1  202.13    8.26 
   5  -5   1  197.46    8.41 
   5  -5   1  186.07    8.47 
  -5  -5  -1  190.56    8.18 
  -5  -5  -1  196.37    8.18 
   5  -5   1  193.93    8.29 
  -5   5  -1  202.64    8.43 
  -5   5  -1  199.19    8.29 
   5   5   1  195.17    8.23 
   5   5   1  201.24    8.70 
   5   5   1  186.07    8.98 
  -5   5  -1  193.42    8.43 
   5   5   1  199.73    8.37 
   5   5   1  180.35    8.39 
  -5   5  -1  199.45    8.86 
  -6  -5  -1   60.06    3.61 
   6  -5   1   56.54    3.71 
   6  -5   1   55.97    4.19 
   6  -5   1   60.76    3.65 
   6  -5   1   54.75    3.41 
   6  -5   1   63.32    3.55 
   6  -5   1   58.41    3.57 
  -6  -5  -1   67.52    4.12 
  -6  -5  -1   60.72    3.37 
  -6  -5  -1   66.33    3.44 
   6  -5   1   59.34    4.05 
  -6   5  -1   58.71    3.26 
   6   5   1   60.07    3.82 
  -6   5  -1   59.72    4.16 
  -6   5  -1   65.28    3.71 
  -6   5  -1   56.91    3.50 
   6   5   1   59.58    4.21 
   6   5   1   64.06    3.44 
  -6   5  -1   55.47    3.54 
   6   5   1   55.28    3.64 
   6   5   1   61.16    3.56 
   7  -5   1    0.29    1.60 
   7  -5   1   -0.49    1.62 
   7  -5   1    1.40    1.74 
  -7  -5  -1    2.73    1.68 
  -7  -5  -1    0.71    1.44 
  -7  -5  -1    2.02    1.90 
  -7  -5  -1    2.67    1.54 
   7  -5   1    4.15    1.58 
   7  -5   1    3.57    2.00 
   7  -5   1    0.85    2.13 
  -7  -5  -1    0.34    1.54 
  -7   5  -1   -0.09    1.49 
  -7   5  -1    3.37    1.56 
   7   5   1    3.15    2.22 
   7   5   1    6.14    2.13 
  -7   5  -1    1.60    2.07 
  -7   5  -1   -0.30    1.47 
  -7   5  -1   -1.18    1.70 
   7   5   1    3.16    1.67 
   7   5   1    6.30    1.70 
   7   5   1    0.39    1.68 
   8  -5   1   82.20    5.04 
   8  -5   1   92.39    5.28 
  -8  -5  -1   83.14    5.23 
  -8  -5  -1   90.90    4.97 
  -8  -5  -1   88.85    5.75 
  -8  -5  -1   79.85    5.30 
   8  -5   1   83.03    5.73 
   8  -5   1   79.07    5.90 
  -8  -5  -1   89.68    4.77 
   8  -5   1   93.90    5.03 
   8   5   1   93.70    5.27 
  -8   5  -1   91.25    5.06 
  -8   5  -1   95.48    6.10 
   8   5   1   89.25    6.07 
  -8   5  -1   83.38    5.24 
  -8   5  -1   73.91    4.93 
  -8   5  -1   85.48    5.06 
   8   5   1   76.89    5.24 
   8   5   1   86.19    5.39 
   8   5   1   74.99    6.01 
  -8   5  -1   86.99    5.16 
  -9  -5  -1   71.70    5.74 
   9  -5   1   76.35    5.39 
  -9  -5  -1   68.14    5.12 
  -9  -5  -1   59.49    4.82 
   9  -5   1   61.58    5.83 
   9  -5   1   66.11    4.99 
   9  -5   1   67.53    5.66 
  -9   5  -1   65.66    4.98 
   9   5   1   67.25    5.76 
  -9   5  -1   72.55    6.17 
   9   5   1   71.21    5.91 
  -9   5  -1   54.73    4.96 
  -9   5  -1   76.48    5.03 
   9   5   1   60.77    5.30 
   9   5   1   70.69    5.34 
  -9   5  -1   65.19    5.35 
 -10  -5  -1   15.79    3.66 
 -10  -5  -1   11.89    3.21 
  10  -5   1   12.34    3.02 
 -10  -5  -1   12.67    2.84 
  10  -5   1   12.51    3.92 
 -10  -5  -1   14.66    3.05 
  10  -5   1    5.08    3.38 
  10   5   1   15.59    3.26 
 -10   5  -1   17.19    3.97 
  10   5   1   18.35    3.63 
 -10   5  -1    9.60    3.02 
 -10   5  -1    6.86    2.81 
 -10   5  -1   14.68    2.97 
  10   5   1   24.13    4.37 
 -10   5  -1   14.56    3.52 
  11  -5   1    8.00    4.49 
 -11  -5  -1    9.82    3.62 
  11  -5   1    7.80    3.61 
 -11  -5  -1   12.25    3.55 
 -11  -5  -1    7.20    3.04 
  11   5   1    7.30    3.63 
 -11   5  -1    5.29    3.81 
  11   5   1    5.72    3.16 
 -11   5  -1    9.76    3.56 
 -12  -5  -1   17.55    4.54 
  12  -5   1   24.19    4.66 
  12  -5   1   27.16    6.11 
 -12  -5  -1   24.45    5.12 
  12   5   1   34.91    5.76 
 -12   5  -1   33.61    4.78 
 -12   5  -1   33.05    5.02 
 -12   5  -1   22.56    5.97 
  12  -6  -1   59.47    6.91 
  12  -6  -1   66.22    5.74 
 -12  -6   1   55.95    5.86 
 -12  -6   1   59.80    5.66 
 -12  -6   1   59.51    6.17 
 -12   6   1   63.63    5.76 
  12   6  -1   55.08    5.87 
  12   6  -1   57.10    6.72 
 -12   6   1   62.87    7.33 
 -12   6   1   61.95    6.05 
  12   6  -1   63.58    6.47 
  11  -6  -1   25.23    3.93 
 -11  -6   1   28.02    4.35 
 -11  -6   1   22.49    3.98 
  11  -6  -1   27.81    4.67 
  11  -6  -1   33.93    4.63 
  11   6  -1   27.29    4.47 
 -11   6   1   25.90    3.90 
  11   6  -1   31.17    4.51 
  11   6  -1   33.00    4.01 
 -11   6   1   24.70    4.08 
 -10  -6   1    4.86    2.36 
  10  -6  -1   11.11    3.03 
 -10  -6   1    0.50    2.65 
  10  -6  -1    7.58    3.35 
  10  -6  -1    6.46    2.58 
 -10  -6   1    3.81    2.45 
  10   6  -1    7.23    2.57 
 -10   6   1   11.25    2.92 
 -10   6   1    6.94    2.57 
 -10   6   1    3.38    2.37 
  10   6  -1    4.86    2.53 
  10   6  -1   10.22    3.31 
  -9  -6   1   65.28    5.05 
  -9  -6   1   51.94    4.15 
   9  -6  -1   66.54    5.29 
   9  -6  -1   57.10    4.49 
  -9  -6   1   55.86    4.42 
   9  -6  -1   56.47    4.76 
   9   6  -1   60.15    4.43 
   9   6  -1   55.71    5.04 
  -9   6   1   54.15    4.37 
  -9   6   1   57.21    4.58 
   9   6  -1   56.36    4.64 
  -9   6   1   54.33    4.40 
   8  -6  -1  114.12    5.89 
   8  -6  -1  108.48    6.34 
  -8  -6   1  101.69    5.91 
  -8  -6   1  102.04    5.76 
   8  -6  -1  106.34    6.67 
  -8  -6   1  112.18    6.41 
   8   6  -1  115.81    5.56 
   8   6  -1  108.21    6.06 
   8   6  -1  127.23    6.41 
   8   6  -1  113.38    5.89 
  -8   6   1  113.89    5.89 
  -8   6   1  112.31    5.92 
  -8   6   1  114.35    6.01 
  -7  -6   1   48.26    3.38 
   7  -6  -1   47.33    3.38 
   7  -6  -1   49.53    3.78 
   7  -6  -1   50.58    3.60 
  -7  -6   1   43.66    3.32 
  -7  -6   1   47.57    3.72 
   7   6  -1   48.22    3.35 
  -7   6   1   49.85    3.34 
  -7   6   1   45.79    3.21 
  -7   6   1   48.76    3.43 
   7   6  -1   45.40    3.35 
   7   6  -1   46.40    3.46 
  -6  -6   1   31.56    2.64 
  -6  -6   1   34.90    2.93 
   6  -6  -1   32.67    2.90 
   6  -6  -1   29.70    2.62 
  -6  -6   1   33.29    2.58 
   6  -6  -1   34.43    2.40 
   6  -6  -1   35.64    3.01 
   6   6  -1   32.79    2.63 
  -6   6   1   29.07    2.32 
   6   6  -1   37.05    2.64 
   6   6  -1   33.35    2.65 
  -6   6   1   35.51    2.61 
  -6   6   1   29.44    2.60 
   5  -6  -1  218.49    9.08 
   5  -6  -1  200.40    8.51 
  -5  -6   1  216.56    9.08 
   5  -6  -1  208.53    9.12 
   5  -6  -1  199.99    8.77 
  -5  -6   1  206.32    8.79 
   5   6  -1  206.25    8.77 
   5   6  -1  202.40    8.73 
  -5   6   1  190.70    8.58 
   5   6  -1  214.59    8.83 
  -5   6   1  195.03    8.65 
  -5   6   1  204.17    8.80 
  -4  -6   1  157.28    6.72 
  -4  -6   1  142.57    6.46 
   4  -6  -1  142.45    6.27 
   4  -6  -1  149.58    6.66 
   4  -6  -1  143.98    6.73 
   4  -6  -1  145.48    6.43 
  -4   6   1  146.37    6.28 
   4   6  -1  143.65    6.41 
   4   6  -1  149.48    6.45 
  -4   6   1  150.18    6.38 
   4   6  -1  158.90    6.51 
  -4   6   1  145.86    6.47 
   3  -6  -1   66.32    3.19 
  -3  -6   1   69.72    3.47 
   3  -6  -1   66.21    3.26 
   3  -6  -1   66.40    3.66 
   3  -6  -1   66.80    3.31 
  -3  -6   1   73.79    3.57 
   3  -6  -1   68.07    3.45 
  -3   6   1   68.94    3.26 
   3   6  -1   67.00    3.28 
   3   6  -1   64.83    3.34 
  -3   6   1   67.16    3.10 
  -3   6   1   68.21    3.34 
   3   6  -1   65.60    3.25 
  -2  -6   1   76.22    3.55 
   2  -6  -1   72.03    3.22 
   2  -6  -1   73.85    3.51 
  -2  -6   1   77.26    3.38 
   2  -6  -1   73.87    3.66 
  -2  -6   1   78.39    3.63 
   2  -6  -1   67.57    3.53 
  -2   6   1   71.42    3.18 
  -2   6   1   75.84    3.58 
  -2   6   1   72.34    3.39 
   2   6  -1   74.23    3.37 
   2   6  -1   75.77    3.36 
   2   6  -1   73.92    3.43 
  -2   6   1   71.88    3.36 
  -1  -6   1   63.17    2.96 
   1  -6  -1   58.64    2.76 
   1  -6  -1   58.99    3.03 
   1  -6  -1   56.39    2.92 
  -1  -6   1   61.27    2.86 
  -1  -6   1   57.03    2.77 
   1  -6  -1   57.89    2.73 
   1  -6  -1   57.55    2.61 
  -1  -6   1   64.51    2.81 
  -1  -6   1   60.74    2.66 
   1  -6  -1   56.21    2.75 
  -1  -6   1   55.63    2.82 
  -1  -6   1   60.41    2.77 
   1   6  -1   59.53    2.85 
  -1   6   1   64.42    2.82 
  -1   6   1   61.21    2.63 
   1   6  -1   58.62    2.76 
  -1   6   1   56.70    2.71 
  -1   6   1   61.03    2.75 
   1   6  -1   62.09    2.69 
   1   6  -1   64.62    2.94 
   1   6  -1   58.89    2.85 
   1   6  -1   59.25    2.78 
   0  -6   1  254.07    9.89 
   0  -6  -1  249.67    9.80 
   0  -6  -1  241.44    9.80 
   0  -6   1  256.55    9.97 
   0  -6  -1  250.40    9.83 
   0  -6   1  241.29    9.86 
   0  -6  -1  248.81    9.83 
   0  -6  -1  232.59    9.78 
   0  -6  -1  240.85    9.88 
   0  -6  -1  247.53    9.88 
   0  -6  -1  248.81    9.68 
   0  -6   1  248.70    9.83 
   0  -6   1  228.41    9.69 
   0  -6   1  234.64    9.82 
   0   6   1  261.83    9.92 
   0   6   1  238.06    9.78 
   0   6  -1  237.72    9.85 
   0   6   1  249.87    9.89 
   0   6  -1  252.14    9.90 
   0   6  -1  237.89    9.69 
   0   6   1  233.61    9.67 
   0   6   1  252.50    9.84 
   0   6   1  237.75    9.66 
   0   6  -1  236.02    9.79 
   0   6  -1  254.06    9.96 
   0   6   1  249.56    9.83 
   0   6   1  251.57    9.81 
  -1  -6  -1   10.00    1.11 
   1  -6   1    8.78    1.17 
   1  -6   1    8.26    0.97 
  -1  -6  -1    9.28    1.10 
  -1  -6  -1    7.17    0.92 
  -1  -6  -1   12.12    0.89 
   1  -6   1    8.53    1.18 
   1  -6   1   10.40    1.29 
  -1   6  -1    5.69    0.81 
  -1   6  -1   11.01    1.03 
  -1   6  -1   11.30    1.33 
   1   6   1    8.80    0.96 
   1   6   1    7.99    0.79 
   1   6   1   11.07    1.25 
   1   6   1   10.15    1.11 
  -2  -6  -1   42.28    2.26 
   2  -6   1   49.07    2.37 
   2  -6   1   50.63    2.50 
   2  -6   1   49.55    2.75 
  -2  -6  -1   53.11    2.73 
   2  -6   1   53.72    2.88 
   2  -6   1   54.60    2.97 
  -2  -6  -1   49.73    2.60 
   2   6   1   50.09    2.54 
  -2   6  -1   54.76    2.65 
   2   6   1   50.28    2.67 
  -2   6  -1   50.92    2.89 
   2   6   1   55.65    2.76 
  -2   6  -1   50.98    2.42 
  -2   6  -1   50.78    2.29 
   2   6   1   53.11    3.00 
   2   6   1   48.34    2.31 
   3  -6   1  306.12   12.71 
   3  -6   1  315.49   12.95 
  -3  -6  -1  308.74   12.61 
   3  -6   1  312.91   12.72 
   3  -6   1  316.22   12.56 
  -3  -6  -1  321.80   12.76 
  -3  -6  -1  297.47   12.52 
   3  -6   1  305.68   12.59 
   3  -6   1  323.70   13.09 
   3   6   1  307.81   12.76 
   3   6   1  327.05   12.61 
  -3   6  -1  319.66   12.56 
  -3   6  -1  297.11   12.56 
   3   6   1  328.62   13.17 
  -3   6  -1  305.45   12.59 
  -3   6  -1  318.91   12.71 
   3   6   1  308.42   12.73 
   3   6   1  316.13   12.66 
  -3   6  -1  314.31   13.02 
  -4  -6  -1  117.12    4.91 
   4  -6   1  117.85    5.23 
   4  -6   1  116.33    5.57 
  -4  -6  -1  108.10    5.04 
  -4  -6  -1  109.38    5.26 
   4  -6   1  112.64    5.13 
   4  -6   1  112.24    5.22 
  -4  -6  -1  112.81    5.59 
   4  -6   1  112.63    4.99 
   4  -6   1  118.27    5.70 
  -4   6  -1  107.94    5.06 
   4   6   1  114.73    5.75 
  -4   6  -1  116.75    5.22 
   4   6   1  121.06    5.20 
   4   6   1  118.29    5.26 
  -4   6  -1  111.72    5.04 
  -4   6  -1  115.14    5.62 
   4   6   1  114.60    4.92 
   4   6   1  113.93    5.25 
   5  -6   1   10.74    1.59 
  -5  -6  -1   10.01    1.91 
   5  -6   1    6.02    1.39 
  -5  -6  -1    8.53    1.51 
   5  -6   1    8.95    1.82 
  -5  -6  -1    5.00    1.30 
   5  -6   1    7.52    1.32 
   5  -6   1    8.50    1.90 
  -5  -6  -1    6.61    1.16 
   5  -6   1   10.37    1.62 
   5   6   1   10.31    2.01 
   5   6   1    8.24    1.59 
  -5   6  -1    5.26    1.67 
  -5   6  -1    5.87    1.28 
   5   6   1    6.87    1.41 
   5   6   1    7.22    1.18 
   5   6   1    5.24    1.41 
  -5   6  -1    8.56    1.43 
  -5   6  -1    6.40    1.33 
   6  -6   1   81.09    4.37 
   6  -6   1   77.55    4.15 
  -6  -6  -1   80.47    4.86 
  -6  -6  -1   80.85    4.00 
   6  -6   1   77.07    4.90 
   6  -6   1   80.74    4.84 
  -6  -6  -1   82.54    4.38 
   6  -6   1   89.26    4.40 
  -6  -6  -1   79.54    4.14 
   6  -6   1   72.29    4.40 
   6   6   1   84.07    4.33 
  -6   6  -1   81.75    4.24 
  -6   6  -1   79.58    4.32 
  -6   6  -1   77.19    4.07 
   6   6   1   88.02    4.12 
   6   6   1   82.02    4.71 
   6   6   1   76.23    4.45 
  -6   6  -1   77.16    4.38 
  -6   6  -1   87.91    5.10 
   6   6   1   77.17    5.02 
   7  -6   1  103.26    5.88 
   7  -6   1  101.82    5.49 
  -7  -6  -1   97.01    5.99 
   7  -6   1  100.92    5.39 
   7  -6   1   96.86    5.12 
  -7  -6  -1  111.69    5.21 
   7  -6   1  104.69    6.25 
  -7  -6  -1  104.48    5.44 
  -7  -6  -1  113.11    5.27 
  -7   6  -1  110.98    6.20 
  -7   6  -1  100.15    5.44 
   7   6   1   96.64    6.24 
  -7   6  -1  101.66    5.49 
   7   6   1  104.36    5.63 
  -7   6  -1   95.13    5.13 
   7   6   1  104.88    5.43 
   7   6   1  109.93    5.27 
  -7   6  -1  106.80    5.29 
   7   6   1   97.93    5.98 
   8  -6   1   35.91    4.19 
   8  -6   1   36.43    3.18 
  -8  -6  -1   36.89    3.06 
  -8  -6  -1   38.48    3.45 
   8  -6   1   31.12    3.63 
  -8  -6  -1   36.67    3.81 
   8  -6   1   37.24    3.35 
   8  -6   1   36.19    3.18 
  -8  -6  -1   34.36    3.46 
  -8  -6  -1   36.65    3.11 
   8   6   1   34.58    3.98 
  -8   6  -1   40.22    4.12 
   8   6   1   39.23    3.18 
   8   6   1   30.00    3.24 
   8   6   1   30.57    3.86 
  -8   6  -1   41.26    3.47 
  -8   6  -1   34.67    2.91 
   8   6   1   35.85    3.50 
  -8   6  -1   35.48    3.27 
  -8   6  -1   38.66    3.44 
   9  -6   1    9.16    3.26 
  -9  -6  -1   11.06    2.64 
   9  -6   1    9.66    2.94 
   9  -6   1   13.98    3.04 
  -9  -6  -1   13.18    2.79 
   9  -6   1   10.01    2.64 
  -9  -6  -1   12.72    3.22 
   9   6   1   14.55    2.77 
  -9   6  -1   13.90    2.64 
  -9   6  -1    9.44    3.03 
  -9   6  -1   12.53    2.65 
   9   6   1    4.22    3.22 
  -9   6  -1    8.49    3.31 
  -9   6  -1   11.42    2.90 
   9   6   1   14.24    3.43 
   9   6   1   11.39    2.66 
 -10  -6  -1   59.97    5.08 
 -10  -6  -1   67.27    5.41 
  10  -6   1   59.95    6.27 
 -10  -6  -1   74.61    6.43 
  10  -6   1   69.47    5.50 
  10  -6   1   63.94    5.84 
  10   6   1   68.52    6.26 
 -10   6  -1   61.36    5.30 
  10   6   1   72.90    5.55 
  10   6   1   65.65    5.77 
 -10   6  -1   68.31    5.29 
 -10   6  -1   60.22    6.57 
  11  -6   1   40.34    6.34 
 -11  -6  -1   48.48    5.84 
  11  -6   1   46.70    5.78 
  11  -6   1   37.70    5.25 
 -11  -6  -1   46.26    5.25 
 -11  -6  -1   45.74    5.23 
 -11   6  -1   36.91    5.71 
  11   6   1   28.20    5.10 
  11   6   1   47.39    5.54 
 -11   6  -1   50.43    5.77 
 -11   6  -1   45.59    5.41 
  12  -6   1   19.81    5.04 
 -12  -6  -1   12.28    4.24 
  12  -6   1    5.69    5.14 
 -12  -6  -1   10.64    3.83 
 -12   6  -1   16.42    3.87 
  12   6   1    8.92    4.03 
 -12   6  -1   14.64    5.11 
 -12  -7   1    0.79    3.49 
  12  -7  -1    9.11    4.39 
 -12  -7   1    4.81    3.57 
  12  -7  -1    0.62    3.13 
 -12   7   1    4.95    3.15 
 -12   7   1    3.63    3.58 
  12   7  -1    2.06    3.34 
  12   7  -1    4.35    3.26 
 -12   7   1   -1.74    4.47 
  11  -7  -1   13.71    3.91 
  11  -7  -1   12.60    3.91 
 -11  -7   1   15.05    3.74 
  11  -7  -1   16.18    3.49 
 -11  -7   1   13.97    3.49 
  11   7  -1   19.61    3.73 
  11   7  -1   19.55    4.07 
  11   7  -1   16.55    3.37 
 -11   7   1   13.96    3.41 
  10  -7  -1    4.48    3.15 
 -10  -7   1    0.99    2.40 
  10  -7  -1    8.10    2.78 
  10  -7  -1    0.66    2.85 
 -10  -7   1    9.44    3.19 
 -10  -7   1    4.73    2.46 
 -10   7   1    5.62    2.47 
 -10   7   1    6.67    2.74 
 -10   7   1    5.11    2.46 
  10   7  -1    4.15    2.50 
  10   7  -1    4.06    2.76 
  10   7  -1    5.89    3.01 
  -9  -7   1    5.51    2.69 
   9  -7  -1    6.95    2.34 
  -9  -7   1    4.24    2.10 
   9  -7  -1    9.80    2.77 
   9  -7  -1    6.04    2.83 
  -9  -7   1    5.32    2.15 
   9   7  -1    4.56    2.38 
   9   7  -1   10.12    2.43 
  -9   7   1    4.72    2.08 
  -9   7   1    5.45    2.09 
  -9   7   1    6.31    2.29 
   9   7  -1    5.50    2.64 
   8  -7  -1    2.29    2.13 
   8  -7  -1    1.11    2.06 
   8  -7  -1    0.76    1.78 
  -8  -7   1   -1.01    1.69 
  -8  -7   1    2.53    2.12 
  -8  -7   1    3.25    1.83 
   8   7  -1    2.29    1.87 
  -8   7   1   -1.30    1.72 
  -8   7   1    0.97    1.77 
  -8   7   1    1.74    1.65 
   8   7  -1   -0.30    1.88 
   8   7  -1    2.90    1.79 
   7  -7  -1    2.15    1.87 
  -7  -7   1    2.03    1.59 
  -7  -7   1   -0.42    1.76 
  -7  -7   1    2.91    1.68 
   7  -7  -1    2.35    1.52 
   7  -7  -1    0.76    1.64 
  -7   7   1    2.11    1.47 
   7   7  -1    6.70    1.84 
   7   7  -1    4.19    1.58 
  -7   7   1    2.19    1.56 
   7   7  -1    3.55    1.65 
  -7   7   1    2.37    1.54 
   6  -7  -1   14.89    2.08 
   6  -7  -1   16.18    1.71 
  -6  -7   1   11.96    1.72 
  -6  -7   1   15.63    1.95 
   6  -7  -1   15.42    1.78 
   6  -7  -1   14.36    2.23 
  -6  -7   1   19.37    2.37 
   6   7  -1    9.12    1.65 
   6   7  -1   17.89    1.99 
  -6   7   1   13.75    1.65 
  -6   7   1   10.76    1.67 
   6   7  -1   13.31    1.80 
  -6   7   1   13.23    1.72 
   5  -7  -1    6.48    1.31 
  -5  -7   1   10.04    1.65 
   5  -7  -1    6.94    1.59 
  -5  -7   1    8.26    1.74 
   5  -7  -1    9.71    1.42 
   5  -7  -1    7.45    1.90 
   5   7  -1    8.63    1.52 
  -5   7   1    7.52    1.26 
  -5   7   1    6.00    1.30 
  -5   7   1    3.29    1.23 
   5   7  -1    9.78    1.44 
   5   7  -1    6.20    1.40 
   4  -7  -1    7.28    1.22 
   4  -7  -1    6.93    1.27 
  -4  -7   1    8.36    1.51 
   4  -7  -1    7.77    1.49 
  -4  -7   1    7.89    1.51 
   4  -7  -1    8.81    1.73 
   4   7  -1    7.26    1.29 
  -4   7   1    7.09    1.24 
  -4   7   1    7.75    1.26 
   4   7  -1    7.02    1.31 
   4   7  -1   11.37    1.38 
  -4   7   1    5.45    1.08 
   3  -7  -1   46.80    3.11 
   3  -7  -1   53.77    2.87 
   3  -7  -1   44.41    2.67 
   3  -7  -1   46.98    2.67 
  -3  -7   1   54.36    2.95 
   3  -7  -1   45.56    2.48 
  -3  -7   1   51.92    2.96 
   3   7  -1   50.68    2.71 
  -3   7   1   46.17    2.37 
   3   7  -1   51.43    2.90 
   3   7  -1   48.01    2.65 
  -3   7   1   49.55    2.70 
   3   7  -1   49.93    2.60 
  -3   7   1   49.88    2.62 
   2  -7  -1   70.92    3.30 
  -2  -7   1   78.98    3.69 
   2  -7  -1   75.91    3.73 
  -2  -7   1   81.27    3.79 
   2  -7  -1   74.94    3.79 
   2  -7  -1   77.13    3.64 
  -2   7   1   75.07    3.54 
   2   7  -1   77.25    3.47 
   2   7  -1   75.19    3.48 
  -2   7   1   76.67    3.27 
   2   7  -1   79.71    3.47 
  -2   7   1   76.39    3.51 
   2   7  -1   73.58    3.58 
  -1  -7   1   73.58    3.48 
   1  -7  -1   74.75    3.43 
  -1  -7   1   85.37    3.51 
   1  -7  -1   75.10    3.57 
   1  -7  -1   76.28    3.30 
  -1  -7   1   78.07    3.60 
  -1  -7   1   69.65    3.44 
   1  -7  -1   80.80    3.78 
  -1  -7   1   78.66    3.68 
   1  -7  -1   75.60    3.64 
  -1  -7   1   79.39    3.39 
  -1   7   1   79.47    3.49 
   1   7  -1   73.43    3.45 
   1   7  -1   82.40    3.52 
   1   7  -1   75.42    3.39 
  -1   7   1   72.61    3.41 
   1   7  -1   81.41    3.58 
  -1   7   1   82.07    3.52 
   1   7  -1   78.84    3.59 
  -1   7   1   80.34    3.32 
   0  -7  -1    0.11    0.79 
   0  -7   1    0.72    0.86 
   0  -7   1    1.14    0.84 
   0  -7   1    0.90    0.57 
   0  -7   1    0.73    0.68 
   0  -7  -1    0.64    0.70 
   0  -7   1    0.37    0.87 
   0  -7  -1   -0.52    0.51 
   0  -7  -1    0.01    0.89 
   0  -7  -1    0.36    0.78 
   0  -7  -1    0.93    0.78 
   0  -7   1   -1.17    0.97 
   0  -7  -1    1.92    1.07 
   0   7   1   -0.51    0.92 
   0   7  -1   -0.58    0.77 
   0   7   1    2.10    0.85 
   0   7  -1    0.87    0.92 
   0   7   1   -0.31    0.54 
   0   7   1    2.64    0.85 
   0   7  -1    0.32    0.54 
   0   7  -1    1.67    0.92 
   0   7   1    0.74    0.73 
   0   7  -1   -0.22    0.72 
   0   7   1   -0.42    0.52 
   0   7   1    0.91    0.74 
  -1  -7  -1    2.42    0.74 
  -1  -7  -1    0.76    0.94 
  -1  -7  -1    2.36    0.99 
   1  -7   1    0.74    1.04 
  -1  -7  -1    1.04    0.82 
   1  -7   1   -0.04    1.06 
   1  -7   1    1.84    1.12 
   1  -7   1    1.14    0.85 
  -1   7  -1    1.54    1.09 
  -1   7  -1    2.76    0.92 
   1   7   1    1.31    0.98 
   1   7   1    2.57    0.98 
   1   7   1   -0.60    0.79 
   1   7   1    1.51    0.64 
  -1   7  -1    1.07    0.70 
  -2  -7  -1   47.89    2.58 
  -2  -7  -1   50.09    2.73 
   2  -7   1   51.49    2.87 
   2  -7   1   49.87    2.46 
   2  -7   1   44.99    2.22 
   2  -7   1   52.25    2.92 
   2  -7   1   50.89    2.78 
   2   7   1   52.42    3.00 
   2   7   1   43.55    2.21 
  -2   7  -1   43.98    2.19 
  -2   7  -1   49.37    2.18 
  -2   7  -1   52.89    2.81 
  -2   7  -1   53.12    2.65 
   2   7   1   49.57    2.57 
  -2   7  -1   51.11    2.38 
   2   7   1   51.88    2.69 
   3  -7   1    2.06    1.33 
   3  -7   1    1.50    0.96 
   3  -7   1    4.08    1.29 
  -3  -7  -1    2.43    1.02 
   3  -7   1    1.07    0.84 
  -3  -7  -1    1.93    1.19 
  -3  -7  -1    1.11    0.77 
   3  -7   1    1.83    1.26 
  -3   7  -1   -0.04    0.86 
   3   7   1    0.69    0.94 
  -3   7  -1    1.18    0.98 
  -3   7  -1    1.02    1.17 
   3   7   1    2.95    1.11 
   3   7   1    0.19    0.86 
  -3   7  -1    0.20    0.74 
   3   7   1    1.68    1.45 
  -3   7  -1    1.21    0.79 
   4  -7   1   10.85    1.62 
   4  -7   1   10.09    1.28 
   4  -7   1    9.99    1.75 
   4  -7   1   13.06    1.54 
  -4  -7  -1   10.55    1.31 
  -4  -7  -1   12.54    1.64 
   4  -7   1   12.29    1.38 
   4  -7   1   12.44    1.91 
  -4  -7  -1   12.22    1.85 
  -4   7  -1   12.29    1.82 
   4   7   1    8.84    1.43 
  -4   7  -1    9.31    1.28 
   4   7   1    9.83    1.35 
   4   7   1   14.26    2.13 
  -4   7  -1   12.47    1.45 
  -4   7  -1   12.55    1.30 
   4   7   1   11.73    1.45 
   5  -7   1   74.16    3.88 
   5  -7   1   75.29    3.64 
  -5  -7  -1   76.33    4.38 
  -5  -7  -1   70.34    3.64 
  -5  -7  -1   72.65    3.99 
   5  -7   1   74.16    4.46 
   5  -7   1   67.90    4.30 
   5  -7   1   68.91    3.90 
   5  -7   1   68.62    3.70 
   5   7   1   77.32    3.85 
   5   7   1   69.88    4.44 
  -5   7  -1   65.71    4.26 
  -5   7  -1   68.42    3.70 
  -5   7  -1   69.95    3.81 
  -5   7  -1   74.05    3.66 
   5   7   1   77.64    3.94 
   5   7   1   71.69    3.87 
   6  -7   1   10.35    1.84 
   6  -7   1    8.28    1.71 
  -6  -7  -1    8.40    2.01 
  -6  -7  -1    6.95    1.47 
  -6  -7  -1   10.33    1.87 
   6  -7   1    9.07    2.10 
  -6  -7  -1   12.01    1.43 
   6  -7   1   10.52    2.19 
  -6   7  -1   10.03    1.68 
  -6   7  -1   10.29    1.38 
   6   7   1   12.34    2.15 
   6   7   1    9.11    1.47 
   6   7   1   12.24    2.36 
   6   7   1    7.31    1.59 
   6   7   1    8.26    1.78 
  -6   7  -1   12.28    1.69 
  -6   7  -1    9.72    1.71 
  -6   7  -1    5.74    2.09 
   7  -7   1    2.32    2.08 
  -7  -7  -1    8.43    2.31 
   7  -7   1    4.26    1.69 
  -7  -7  -1    2.63    1.82 
  -7  -7  -1    1.16    1.33 
   7  -7   1    4.67    2.16 
  -7  -7  -1   -0.87    1.43 
   7  -7   1    3.87    1.85 
   7  -7   1    3.24    1.78 
  -7   7  -1    2.92    1.59 
   7   7   1    3.28    1.61 
  -7   7  -1    3.14    1.64 
   7   7   1   -1.32    1.83 
  -7   7  -1    2.17    2.07 
   7   7   1    0.23    1.72 
   7   7   1    1.33    2.19 
   7   7   1    2.27    1.65 
  -7   7  -1    0.21    1.53 
  -7   7  -1    0.04    1.50 
   8  -7   1   11.92    2.36 
  -8  -7  -1    9.46    2.41 
  -8  -7  -1   10.76    2.78 
   8  -7   1    9.05    3.02 
   8  -7   1    9.22    2.10 
  -8  -7  -1   12.62    2.59 
   8  -7   1    9.19    2.31 
   8  -7   1   12.90    2.95 
  -8  -7  -1    9.68    2.46 
  -8   7  -1   10.13    2.42 
  -8   7  -1   11.02    2.15 
   8   7   1   11.55    2.60 
   8   7   1   12.87    2.88 
  -8   7  -1   10.81    3.00 
  -8   7  -1   12.67    2.34 
   8   7   1    9.54    2.21 
   8   7   1   11.35    3.03 
  -8   7  -1    9.89    2.01 
   9  -7   1   14.06    2.82 
   9  -7   1    9.98    3.42 
   9  -7   1   16.11    3.40 
  -9  -7  -1   10.36    2.91 
  -9  -7  -1   11.29    2.65 
   9  -7   1   10.03    2.99 
  -9  -7  -1   12.71    3.27 
  -9   7  -1   19.81    3.99 
   9   7   1   13.40    3.04 
  -9   7  -1   12.20    2.91 
   9   7   1   14.65    3.52 
   9   7   1   14.34    3.45 
   9   7   1   12.06    3.02 
  -9   7  -1   11.14    3.13 
  -9   7  -1    9.38    2.80 
  -9   7  -1   12.33    2.59 
 -10  -7  -1    8.54    3.00 
  10  -7   1    5.64    3.65 
 -10  -7  -1    9.96    3.08 
  10  -7   1    8.49    3.46 
 -10  -7  -1    8.27    3.51 
  10  -7   1   10.94    3.03 
 -10   7  -1    6.67    2.71 
 -10   7  -1    8.43    3.56 
  10   7   1    6.86    3.30 
  10   7   1    7.22    2.85 
  11  -7   1    3.40    3.56 
  11  -7   1   -0.33    3.91 
 -11  -7  -1    4.42    3.47 
 -11  -7  -1    0.88    2.62 
 -11  -7  -1    4.99    3.61 
  11  -7   1    7.38    4.17 
 -11   7  -1    5.02    2.82 
 -11   7  -1    1.63    3.27 
 -11   7  -1    2.47    3.94 
  11   7   1    0.48    3.21 
  11   7   1    3.92    3.49 
 -11   7  -1    2.81    3.26 
 -12  -7  -1    6.97    4.11 
  12  -7   1   15.18    5.41 
  12   7   1   -3.67    3.21 
 -12   7  -1    1.29    3.55 
  12  -8  -1   26.47    4.30 
  12  -8  -1   22.29    5.17 
 -12  -8   1   24.12    4.55 
  12   8  -1   36.85    4.46 
 -12   8   1   22.59    5.29 
  12   8  -1   30.51    4.22 
 -12   8   1   22.88    3.98 
 -11  -8   1   10.79    3.60 
 -11  -8   1    9.59    3.13 
  11  -8  -1   11.29    3.24 
  11  -8  -1    4.12    3.63 
  11  -8  -1    9.01    3.76 
  11   8  -1    8.31    2.96 
  11   8  -1   10.96    3.85 
 -11   8   1    4.98    2.83 
 -11   8   1    7.15    3.05 
  11   8  -1    9.35    3.18 
  10  -8  -1    2.21    2.90 
 -10  -8   1    4.05    2.43 
  10  -8  -1    0.48    2.31 
 -10  -8   1    2.31    2.87 
 -10  -8   1    2.85    2.41 
  10  -8  -1   -1.00    2.89 
  10   8  -1    5.47    2.47 
  10   8  -1   -0.10    2.32 
 -10   8   1    1.28    2.51 
 -10   8   1   -0.46    2.16 
 -10   8   1    3.79    2.40 
  10   8  -1    6.35    3.20 
  -9  -8   1   30.09    3.31 
   9  -8  -1   24.37    3.51 
   9  -8  -1   25.69    3.84 
  -9  -8   1   28.31    3.11 
  -9  -8   1   36.34    4.05 
   9  -8  -1   27.29    3.19 
  -9   8   1   30.85    3.19 
  -9   8   1   30.51    3.20 
   9   8  -1   30.63    3.26 
   9   8  -1   22.64    3.31 
  -9   8   1   30.79    3.27 
   9   8  -1   29.38    3.59 
  -8  -8   1   27.36    2.79 
   8  -8  -1   21.25    2.74 
  -8  -8   1   27.17    3.30 
   8  -8  -1   27.53    3.29 
  -8  -8   1   22.04    2.78 
   8  -8  -1   26.17    3.33 
  -8   8   1   27.29    2.77 
   8   8  -1   25.25    2.69 
  -8   8   1   26.79    2.75 
  -8   8   1   21.79    2.75 
   8   8  -1   25.87    3.01 
   8   8  -1   25.94    3.08 
   7  -8  -1   15.89    2.47 
  -7  -8   1   21.45    2.41 
   7  -8  -1   21.93    2.74 
   7  -8  -1   22.51    2.14 
   7  -8  -1   23.23    2.43 
  -7  -8   1   24.10    2.79 
  -7  -8   1   17.30    2.17 
   7   8  -1   19.03    2.27 
   7   8  -1   18.81    2.30 
  -7   8   1   21.02    2.25 
  -7   8   1   20.38    2.29 
   7   8  -1   20.21    2.40 
  -7   8   1   19.33    2.14 
   6  -8  -1    0.50    1.66 
   6  -8  -1   -0.01    1.30 
  -6  -8   1    0.87    1.60 
  -6  -8   1   -0.69    1.38 
   6  -8  -1   -0.61    1.24 
   6  -8  -1   -1.66    1.35 
  -6   8   1    0.26    1.19 
   6   8  -1   -1.06    1.25 
  -6   8   1    3.10    1.35 
   6   8  -1    2.16    1.49 
   6   8  -1   -1.01    1.22 
  -6   8   1    0.58    1.29 
  -5  -8   1   48.71    3.07 
  -5  -8   1   46.17    3.27 
   5  -8  -1   44.44    2.77 
   5  -8  -1   45.92    2.95 
   5  -8  -1   40.01    3.47 
   5  -8  -1   47.12    3.21 
  -5   8   1   50.92    2.89 
  -5   8   1   44.76    2.64 
  -5   8   1   41.24    2.93 
   5   8  -1   45.14    2.92 
   5   8  -1   52.91    2.97 
   5   8  -1   49.06    2.95 
  -4  -8   1  101.87    4.82 
   4  -8  -1   97.44    4.65 
  -4  -8   1   97.75    4.92 
   4  -8  -1  106.60    4.92 
   4  -8  -1   98.94    5.09 
   4  -8  -1   96.14    4.57 
   4   8  -1   99.63    4.62 
   4   8  -1   93.69    4.62 
  -4   8   1   96.37    4.65 
  -4   8   1   98.96    4.56 
  -4   8   1   94.40    4.36 
   4   8  -1  104.50    4.64 
   4   8  -1  101.76    4.93 
   3  -8  -1    0.20    1.16 
   3  -8  -1    1.42    1.16 
   3  -8  -1    2.78    0.92 
  -3  -8   1    1.06    1.31 
   3  -8  -1   -0.24    1.40 
  -3  -8   1    1.97    1.24 
   3   8  -1    1.23    1.03 
  -3   8   1    1.65    1.01 
   3   8  -1   -0.94    0.94 
  -3   8   1    1.28    0.98 
  -3   8   1    1.22    0.75 
   3   8  -1    1.78    1.20 
   3   8  -1    0.43    1.01 
  -2  -8   1   91.51    4.27 
   2  -8  -1   87.98    4.31 
  -2  -8   1   90.75    4.10 
   2  -8  -1   78.38    4.03 
   2  -8  -1   82.97    4.21 
   2  -8  -1   83.89    3.76 
  -2  -8   1   94.84    4.22 
   2   8  -1   88.86    3.98 
  -2   8   1   86.09    3.73 
   2   8  -1   92.79    4.02 
   2   8  -1   92.51    4.09 
  -2   8   1   88.75    4.03 
   2   8  -1   90.03    3.98 
  -2   8   1   89.95    4.01 
  -1  -8   1   16.09    1.59 
  -1  -8   1   15.42    1.20 
   1  -8  -1   17.77    1.77 
   1  -8  -1   13.11    1.47 
  -1  -8   1   12.07    1.21 
   1  -8  -1   13.93    1.17 
   1  -8  -1   15.87    1.26 
  -1  -8   1   17.50    1.57 
  -1  -8   1   14.13    1.29 
  -1  -8   1   14.80    1.58 
   1   8  -1   18.75    1.43 
  -1   8   1   14.37    1.25 
  -1   8   1   16.35    1.35 
  -1   8   1   16.72    1.19 
   1   8  -1   15.59    1.44 
  -1   8   1   16.26    1.36 
   1   8  -1   18.10    1.28 
   1   8  -1   14.15    1.23 
   1   8  -1   17.01    1.78 
   0  -8  -1   18.65    1.64 
   0  -8  -1   22.84    1.88 
   0  -8   1   18.70    1.28 
   0  -8   1   21.32    1.73 
   0  -8  -1   21.68    1.50 
   0  -8  -1   21.91    1.27 
   0  -8   1   19.14    1.66 
   0  -8  -1   25.88    1.97 
   0  -8   1   20.14    1.46 
   0  -8   1   22.65    1.89 
   0  -8   1   16.68    1.26 
   0  -8  -1   20.90    1.60 
   0   8  -1   19.37    1.68 
   0   8  -1   20.64    1.37 
   0   8   1   23.07    1.81 
   0   8   1   21.87    1.65 
   0   8  -1   18.32    1.23 
   0   8   1   21.21    1.55 
   0   8   1   22.62    1.29 
   0   8  -1   24.24    1.81 
   0   8   1   23.65    1.56 
   0   8   1   22.80    1.67 
   0   8  -1   18.16    1.49 
   0   8   1   19.05    1.26 
  -1  -8  -1    9.46    1.21 
  -1  -8  -1   10.52    1.00 
   1  -8   1    6.48    1.09 
  -1  -8  -1    8.61    0.74 
   1  -8   1    7.26    1.33 
  -1  -8  -1   11.94    1.34 
   1  -8   1    9.21    1.38 
   1   8   1    8.55    1.30 
   1   8   1    7.93    1.07 
   1   8   1    8.98    0.87 
  -1   8  -1    9.06    1.18 
   1   8   1   10.05    1.28 
  -1   8  -1    8.70    1.36 
   2  -8   1   78.73    3.85 
  -2  -8  -1   79.84    3.81 
   2  -8   1   78.43    3.98 
   2  -8   1   80.05    4.02 
  -2  -8  -1   78.59    3.71 
   2  -8   1   78.42    3.57 
  -2   8  -1   79.51    3.75 
  -2   8  -1   81.11    3.49 
   2   8   1   68.05    3.31 
  -2   8  -1   80.07    4.00 
   2   8   1   83.16    3.80 
   2   8   1   83.77    3.70 
   2   8   1   83.24    4.09 
   3  -8   1   25.73    2.20 
   3  -8   1   22.88    1.76 
  -3  -8  -1   19.43    1.46 
   3  -8   1   26.26    2.21 
   3  -8   1   21.09    1.56 
  -3  -8  -1   27.25    2.03 
   3  -8   1   26.12    2.25 
  -3  -8  -1   25.59    1.88 
  -3   8  -1   22.88    1.53 
  -3   8  -1   27.20    2.01 
  -3   8  -1   21.66    1.50 
   3   8   1   24.03    1.53 
   3   8   1   27.54    2.08 
  -3   8  -1   23.91    1.72 
  -3   8  -1   27.06    2.21 
   3   8   1   21.39    1.92 
   3   8   1   34.49    2.59 
   4  -8   1   56.82    3.29 
  -4  -8  -1   56.55    3.27 
  -4  -8  -1   59.06    3.02 
   4  -8   1   56.04    3.64 
   4  -8   1   51.61    2.91 
  -4  -8  -1   56.63    3.58 
   4  -8   1   59.75    2.96 
   4  -8   1   49.30    3.50 
  -4   8  -1   55.81    2.86 
  -4   8  -1   56.13    2.94 
   4   8   1   57.24    3.26 
  -4   8  -1   61.40    3.21 
   4   8   1   56.95    3.78 
   4   8   1   56.49    3.15 
  -4   8  -1   62.39    3.63 
   4   8   1   57.74    3.06 
   5  -8   1    0.71    1.53 
   5  -8   1    4.32    1.23 
  -5  -8  -1    3.95    1.43 
  -5  -8  -1    2.57    1.23 
  -5  -8  -1    0.87    1.61 
   5  -8   1    3.67    1.75 
   5  -8   1    2.30    1.32 
   5  -8   1    2.75    1.50 
   5   8   1    2.78    1.31 
   5   8   1    0.29    1.34 
  -5   8  -1    2.91    1.21 
   5   8   1    2.64    1.72 
  -5   8  -1    1.78    1.23 
  -5   8  -1    1.19    1.18 
   5   8   1    4.72    1.43 
  -5   8  -1    4.18    1.73 
   6  -8   1   55.73    3.31 
   6  -8   1   57.14    3.61 
  -6  -8  -1   59.09    4.26 
  -6  -8  -1   56.96    3.36 
  -6  -8  -1   58.84    3.72 
   6  -8   1   52.25    4.35 
   6  -8   1   61.88    4.25 
   6  -8   1   57.07    3.59 
   6   8   1   62.89    3.77 
  -6   8  -1   53.15    3.38 
  -6   8  -1   55.47    3.48 
  -6   8  -1   59.12    3.41 
  -6   8  -1   59.29    4.05 
   6   8   1   53.96    3.68 
   6   8   1   60.69    3.62 
   6   8   1   49.92    4.16 
   7  -8   1   24.62    2.69 
  -7  -8  -1   24.56    3.22 
  -7  -8  -1   25.83    2.78 
  -7  -8  -1   21.00    2.13 
   7  -8   1   23.89    2.64 
   7  -8   1   30.77    3.43 
  -7  -8  -1   25.65    2.42 
   7  -8   1   26.91    3.29 
   7   8   1   22.10    2.66 
  -7   8  -1   21.48    2.41 
   7   8   1   30.46    3.60 
   7   8   1   25.95    2.65 
  -7   8  -1   24.95    2.49 
  -7   8  -1   32.95    3.62 
  -7   8  -1   22.73    2.49 
  -7   8  -1   23.48    2.16 
   7   8   1   22.43    2.78 
  -8  -8  -1   12.35    2.97 
   8  -8   1    5.86    2.70 
  -8  -8  -1   10.08    2.36 
   8  -8   1    6.47    2.25 
  -8  -8  -1    9.09    2.37 
   8  -8   1    7.54    2.85 
   8  -8   1   10.33    3.08 
  -8  -8  -1   10.75    2.41 
  -8   8  -1    6.69    2.03 
  -8   8  -1    5.66    2.91 
   8   8   1    9.23    2.21 
   8   8   1    9.87    2.56 
  -8   8  -1    6.40    2.14 
   8   8   1   10.30    3.13 
  -8   8  -1    6.83    2.20 
   8   8   1   11.53    2.77 
  -8   8  -1    5.91    1.92 
  -9  -8  -1    7.88    2.46 
   9  -8   1    2.61    2.33 
  -9  -8  -1    0.60    2.44 
   9  -8   1    3.94    3.29 
   9  -8   1    4.62    2.84 
  -9  -8  -1    5.60    3.06 
   9  -8   1    3.14    2.79 
   9   8   1   -1.11    2.88 
  -9   8  -1    1.37    2.51 
   9   8   1    3.03    3.08 
   9   8   1    2.17    2.53 
  -9   8  -1    2.02    3.13 
   9   8   1    5.16    2.35 
  -9   8  -1    1.60    2.16 
  10  -8   1   10.00    3.71 
  10  -8   1    5.95    2.87 
 -10  -8  -1    3.54    3.02 
 -10  -8  -1    8.92    3.10 
  10  -8   1   12.42    4.07 
 -10  -8  -1   10.87    3.42 
 -10   8  -1    7.29    4.11 
  10   8   1    7.01    3.16 
 -10   8  -1    9.98    3.62 
 -10   8  -1    5.24    2.60 
  10   8   1   13.92    3.16 
 -11  -8  -1   23.24    4.59 
  11  -8   1   20.47    4.68 
  11  -8   1   14.18    4.86 
 -11  -8  -1   17.24    4.09 
  11  -8   1   19.72    4.70 
  11   8   1   18.08    4.11 
  11   8   1   18.88    3.84 
 -11   8  -1   20.07    4.41 
 -11   8  -1   20.48    5.42 
 -11   8  -1   27.20    4.53 
 -12  -8  -1    8.45    3.57 
  12   8   1    2.70    3.50 
 -12   8  -1    2.23    3.49 
 -12  -9   1    0.96    3.20 
  12  -9  -1    3.35    3.62 
  12  -9  -1    8.25    4.62 
 -12   9   1    6.37    4.52 
 -12   9   1    6.31    3.78 
  12   9  -1    3.66    3.30 
  11  -9  -1   29.95    3.92 
 -11  -9   1   29.00    3.70 
  11  -9  -1   13.55    4.11 
  11  -9  -1   24.74    4.46 
 -11  -9   1   25.59    4.43 
 -11   9   1   28.64    5.53 
  11   9  -1   21.55    3.74 
  11   9  -1   17.16    4.09 
 -11   9   1   21.34    3.67 
 -11   9   1   30.51    3.87 
  11   9  -1   25.53    4.69 
  10  -9  -1   76.21    6.05 
 -10  -9   1   68.07    5.53 
 -10  -9   1   76.25    6.22 
 -10  -9   1   68.19    5.40 
  10  -9  -1   78.06    6.28 
  10  -9  -1   80.50    5.48 
  10   9  -1   80.52    5.63 
 -10   9   1   80.89    5.54 
  10   9  -1   78.86    6.20 
 -10   9   1   78.40    5.34 
  10   9  -1   64.75    5.53 
  -9  -9   1   38.59    3.65 
  -9  -9   1   41.11    3.81 
   9  -9  -1   39.68    4.26 
  -9  -9   1   45.76    4.56 
   9  -9  -1   38.60    4.26 
   9  -9  -1   42.40    3.83 
   9   9  -1   44.11    4.08 
  -9   9   1   42.82    3.67 
   9   9  -1   44.66    4.32 
   9   9  -1   43.69    3.85 
  -9   9   1   39.30    3.54 
  -9   9   1   39.43    3.76 
   8  -9  -1   33.82    3.22 
  -8  -9   1   39.82    3.85 
   8  -9  -1   46.78    4.09 
   8  -9  -1   28.23    3.56 
  -8  -9   1   42.74    3.62 
  -8  -9   1   32.71    3.25 
   8  -9  -1   41.76    3.50 
   8   9  -1   40.74    3.48 
  -8   9   1   36.82    3.14 
  -8   9   1   38.17    3.25 
   8   9  -1   43.51    4.03 
   8   9  -1   39.46    3.53 
  -8   9   1   32.86    3.28 
  -7  -9   1  197.52    9.19 
   7  -9  -1  205.35    9.76 
   7  -9  -1  205.87    9.68 
   7  -9  -1  205.64    9.20 
  -7  -9   1  205.86    9.76 
  -7  -9   1  201.15    9.29 
   7  -9  -1  219.06    9.01 
   7   9  -1  207.05    9.25 
  -7   9   1  205.19    9.12 
   7   9  -1  199.62    9.31 
  -7   9   1  207.51    9.29 
  -7   9   1  200.61    8.93 
   7   9  -1  203.77    9.28 
  -6  -9   1   97.35    5.08 
   6  -9  -1   85.43    5.05 
   6  -9  -1   90.63    4.91 
  -6  -9   1   93.94    4.75 
   6  -9  -1   93.93    4.46 
   6  -9  -1   82.27    4.59 
  -6   9   1   84.22    4.60 
  -6   9   1   84.72    4.30 
   6   9  -1   92.88    4.57 
   6   9  -1   84.71    4.60 
  -6   9   1   85.26    4.51 
   6   9  -1   84.79    4.59 
   5  -9  -1    5.99    1.47 
   5  -9  -1    9.76    2.04 
  -5  -9   1    7.13    1.71 
   5  -9  -1    7.32    1.64 
  -5  -9   1    7.53    1.68 
   5  -9  -1    6.40    1.40 
  -5   9   1    4.87    1.28 
  -5   9   1    4.40    1.16 
   5   9  -1    7.22    1.46 
   5   9  -1    8.28    1.46 
  -5   9   1    4.69    1.29 
   5   9  -1    7.71    1.47 
   4  -9  -1   32.91    2.40 
  -4  -9   1   33.67    2.67 
   4  -9  -1   32.88    2.93 
   4  -9  -1   33.97    2.52 
  -4  -9   1   30.27    2.63 
   4  -9  -1   35.22    2.43 
  -4   9   1   36.86    2.43 
   4   9  -1   37.61    2.43 
   4   9  -1   37.03    2.73 
  -4   9   1   31.19    1.99 
   4   9  -1   33.10    2.28 
   4   9  -1   34.18    2.46 
  -3  -9   1  374.62   14.75 
  -3  -9   1  368.83   14.81 
   3  -9  -1  344.70   14.35 
   3  -9  -1  359.02   14.74 
   3  -9  -1  358.91   14.58 
   3  -9  -1  351.66   14.83 
  -3   9   1  330.26   14.28 
  -3   9   1  358.99   14.51 
   3   9  -1  359.75   14.61 
   3   9  -1  375.80   14.80 
   3   9  -1  373.98   14.58 
   3   9  -1  371.41   14.55 
  -3   9   1  358.88   14.60 
  -2  -9   1  321.59   12.71 
   2  -9  -1  283.28   12.45 
   2  -9  -1  315.72   12.90 
  -2  -9   1  321.99   12.83 
   2  -9  -1  298.27   12.76 
   2  -9  -1  317.04   12.82 
  -2  -9   1  323.26   12.87 
   2   9  -1  321.86   12.81 
  -2   9   1  308.29   12.66 
  -2   9   1  314.78   12.72 
   2   9  -1  324.22   12.68 
   2   9  -1  315.69   12.75 
  -2   9   1  306.22   12.44 
   2   9  -1  327.27   12.69 
  -1  -9   1   12.28    1.30 
   1  -9  -1   13.43    1.17 
  -1  -9   1   14.30    1.61 
  -1  -9   1   12.43    1.21 
   1  -9  -1   11.00    1.47 
   1  -9  -1   15.85    1.27 
  -1  -9   1   13.91    1.61 
  -1  -9   1   16.07    1.15 
   1  -9  -1   14.61    1.81 
   1   9  -1   11.07    0.98 
   1   9  -1   18.12    1.35 
  -1   9   1   13.27    1.29 
  -1   9   1   17.15    1.41 
  -1   9   1   12.61    1.12 
  -1   9   1   15.88    1.37 
  -1   9   1   12.31    1.18 
   1   9  -1   15.70    1.46 
  -1   9   1   14.43    1.18 
   1   9  -1   12.92    1.23 
   1   9  -1   16.50    1.41 
   0  -9  -1  221.30    9.11 
   0  -9  -1  223.40    8.96 
   0  -9  -1  225.68    8.82 
   0  -9   1  214.91    8.99 
   0  -9   1  198.80    8.75 
   0  -9   1  216.74    8.84 
   0  -9   1  219.79    8.97 
   0  -9  -1  213.36    8.94 
   0  -9   1  219.93    9.07 
   0  -9  -1  222.64    8.94 
   0  -9   1  208.39    8.77 
   0   9  -1  229.41    9.11 
   0   9  -1  223.68    8.87 
   0   9   1  226.60    9.01 
   0   9  -1  204.65    8.75 
   0   9   1  222.98    8.82 
   0   9  -1  224.34    9.08 
   0   9   1  224.05    8.84 
   0   9   1  217.86    8.94 
   0   9   1  228.89    9.07 
  -1  -9  -1  550.90   22.08 
   1  -9   1  557.01   22.17 
  -1  -9  -1  549.01   21.87 
  -1  -9  -1  608.81   21.83 
   1  -9   1  523.59   21.84 
   1  -9   1  544.93   22.10 
   1  -9   1  539.06   21.96 
  -1  -9  -1  525.60   22.04 
   1   9   1  511.11   21.75 
  -1   9  -1  565.65   22.11 
   1   9   1  572.99   22.14 
   1   9   1  549.81   22.03 
  -1   9  -1  569.50   22.28 
   1   9   1  603.73   22.24 
  -1   9  -1  565.80   21.88 
  -2  -9  -1  236.14   10.18 
  -2  -9  -1  259.59   10.54 
   2  -9   1  253.93   10.61 
  -2  -9  -1  253.86   10.58 
   2  -9   1  261.57   10.79 
   2  -9   1  252.80   10.38 
   2  -9   1  257.74   10.82 
  -2   9  -1  264.15   10.85 
  -2   9  -1  257.69   10.57 
  -2   9  -1  267.56   10.34 
   2   9   1  283.74   10.92 
   2   9   1  226.01   10.19 
   2   9   1  265.88   10.51 
   2   9   1  271.86   10.63 
   3  -9   1    1.55    1.34 
  -3  -9  -1    3.65    1.10 
  -3  -9  -1    0.32    0.68 
  -3  -9  -1    3.25    1.29 
   3  -9   1    0.47    1.45 
  -3  -9  -1    0.89    1.26 
   3  -9   1    1.77    1.38 
   3  -9   1    2.27    1.04 
  -3   9  -1    2.03    0.70 
   3   9   1    0.67    1.41 
   3   9   1    3.04    1.08 
  -3   9  -1    1.33    0.91 
  -3   9  -1    1.64    0.69 
  -3   9  -1    1.12    1.25 
   3   9   1    1.67    1.17 
  -3   9  -1    2.91    1.08 
   3   9   1    1.92    0.85 
   4  -9   1  141.28    6.84 
   4  -9   1  140.97    6.41 
  -4  -9  -1  142.30    6.22 
   4  -9   1  147.37    6.78 
  -4  -9  -1  144.25    6.79 
   4  -9   1  147.92    6.12 
  -4  -9  -1  143.63    6.48 
   4   9   1  141.10    6.41 
   4   9   1  136.47    6.89 
  -4   9  -1  147.51    6.18 
  -4   9  -1  139.63    6.71 
  -4   9  -1  132.45    6.03 
   4   9   1  144.18    6.32 
  -4   9  -1  144.89    6.40 
   4   9   1  146.60    6.23 
  -5  -9  -1  229.99   10.34 
  -5  -9  -1  243.31   10.08 
  -5  -9  -1  237.41   10.70 
   5  -9   1  227.58   10.59 
   5  -9   1  235.29   10.85 
   5  -9   1  249.74    9.97 
   5  -9   1  238.00   10.18 
  -5   9  -1  240.72   10.78 
   5   9   1  250.98   10.22 
   5   9   1  245.66   10.27 
  -5   9  -1  238.29   10.20 
  -5   9  -1  241.24    9.99 
   5   9   1  234.31   10.83 
   5   9   1  237.09   10.29 
  -5   9  -1  231.69    9.92 
  -6  -9  -1  101.13    5.79 
   6  -9   1   93.14    5.72 
   6  -9   1  105.48    5.43 
   6  -9   1  105.36    5.86 
  -6  -9  -1  107.95    5.08 
   6  -9   1  104.05    4.94 
   6  -9   1  102.32    5.29 
  -6  -9  -1  100.85    5.40 
  -6   9  -1  101.91    5.03 
   6   9   1   98.53    5.39 
   6   9   1  107.19    5.97 
  -6   9  -1  103.20    5.23 
  -6   9  -1  105.55    5.05 
   6   9   1  102.89    5.21 
   6   9   1  103.18    5.42 
  -6   9  -1  102.77    5.90 
   7  -9   1    1.75    2.05 
   7  -9   1    3.65    2.25 
   7  -9   1    1.84    1.74 
  -7  -9  -1    0.82    1.55 
  -7  -9  -1   -0.40    2.06 
  -7  -9  -1    1.96    1.81 
   7  -9   1    0.47    2.22 
  -7   9  -1    3.27    1.62 
  -7   9  -1    1.69    1.66 
   7   9   1    1.88    1.67 
   7   9   1    1.93    1.95 
  -7   9  -1    2.10    1.60 
   7   9   1    3.15    2.40 
   7   9   1    0.82    1.75 
  -7   9  -1    3.58    2.38 
   8  -9   1  136.82    7.41 
   8  -9   1  141.67    8.04 
   8  -9   1  141.97    7.35 
  -8  -9  -1  146.13    7.01 
  -8  -9  -1  130.98    8.06 
  -8  -9  -1  142.23    7.53 
   8  -9   1  134.81    8.39 
  -8   9  -1  150.80    9.12 
  -8   9  -1  160.70    7.24 
  -8   9  -1  154.57    7.44 
   8   9   1  151.54    7.44 
   8   9   1  146.92    7.66 
   8   9   1  141.33    7.35 
   8   9   1  126.09    8.23 
  -8   9  -1  141.82    7.27 
   9  -9   1   91.29    6.19 
   9  -9   1   85.09    6.59 
  -9  -9  -1   80.28    5.89 
   9  -9   1   78.01    6.31 
  -9  -9  -1   80.25    5.60 
   9  -9   1   89.43    5.77 
  -9  -9  -1   74.18    6.21 
  -9   9  -1   87.20    5.27 
   9   9   1   83.35    6.28 
   9   9   1   72.89    6.54 
  -9   9  -1   87.10    7.16 
   9   9   1   80.75    5.98 
   9   9   1   87.32    5.67 
  -9   9  -1   90.70    5.61 
 -10  -9  -1   25.16    3.46 
  10  -9   1   20.23    4.97 
 -10  -9  -1   20.53    3.39 
  10  -9   1   15.61    4.12 
  10  -9   1   11.53    3.26 
 -10  -9  -1   21.01    4.16 
 -10   9  -1   15.89    4.24 
  10   9   1   18.17    3.36 
  10   9   1   14.47    3.74 
 -10   9  -1   23.74    3.10 
 -10   9  -1   20.63    3.35 
  11  -9   1   18.71    5.18 
 -11  -9  -1   23.76    4.08 
  11  -9   1   17.44    4.81 
  11  -9   1   12.58    4.43 
 -11  -9  -1   11.93    3.82 
 -11  -9  -1   15.31    4.48 
 -11   9  -1   21.71    5.19 
  11   9   1   18.97    4.05 
 -11   9  -1   22.28    4.49 
 -11   9  -1   15.68    3.29 
 -11   9  -1   13.18    4.40 
  11   9   1   17.31    3.97 
 -12 -10   1   41.72    5.49 
  12 -10  -1   44.32    6.28 
  12 -10  -1   36.98    5.66 
 -12  10   1   45.55    5.29 
 -12  10   1   60.89    7.56 
  12  10  -1   59.95    5.72 
 -11 -10   1   14.23    3.17 
  11 -10  -1   11.14    3.99 
  11 -10  -1    8.67    3.10 
  11 -10  -1   13.23    3.90 
 -11 -10   1   18.94    3.90 
 -11  10   1   16.06    3.76 
 -11  10   1   22.71    5.05 
 -11  10   1    6.92    2.99 
  11  10  -1    8.81    3.57 
  11  10  -1    9.00    2.97 
  10 -10  -1    5.53    3.17 
 -10 -10   1   -1.68    2.38 
 -10 -10   1    1.31    2.81 
 -10 -10   1    6.15    2.72 
  10 -10  -1    5.58    2.70 
  10 -10  -1    4.53    3.28 
  10  10  -1    3.56    2.32 
  10  10  -1    0.46    2.53 
 -10  10   1    3.76    2.52 
  10  10  -1    2.96    3.00 
 -10  10   1    8.19    2.61 
   9 -10  -1   22.54    3.74 
  -9 -10   1   26.88    3.14 
   9 -10  -1   31.42    4.04 
   9 -10  -1   27.78    3.13 
  -9 -10   1   28.30    3.43 
  -9 -10   1   42.32    4.42 
   9  10  -1   27.84    3.16 
  -9  10   1   23.99    2.95 
   9  10  -1   31.96    3.71 
   9  10  -1   28.50    3.52 
  -9  10   1   27.71    3.11 
  -9  10   1   22.41    2.98 
  -8 -10   1   81.58    4.84 
  -8 -10   1   81.43    5.59 
  -8 -10   1   75.36    4.98 
   8 -10  -1   78.34    4.89 
   8 -10  -1   80.75    5.29 
   8 -10  -1   85.03    4.76 
   8 -10  -1   75.51    5.46 
   8  10  -1   80.25    5.09 
   8  10  -1   74.56    4.81 
   8  10  -1   71.04    5.14 
  -8  10   1   72.03    4.37 
  -8  10   1   80.13    4.84 
  -8  10   1   78.62    4.85 
   7 -10  -1   46.63    3.47 
  -7 -10   1   44.68    3.57 
   7 -10  -1   42.29    3.84 
  -7 -10   1   50.38    4.14 
   7 -10  -1   43.33    3.49 
   7 -10  -1   53.53    4.15 
   7  10  -1   49.99    3.47 
  -7  10   1   50.30    3.49 
  -7  10   1   54.00    3.51 
   7  10  -1   44.12    3.54 
   7  10  -1   51.66    3.51 
  -7  10   1   46.51    3.11 
   6 -10  -1    5.36    1.77 
  -6 -10   1    5.57    1.90 
   6 -10  -1    4.67    1.55 
   6 -10  -1    6.79    2.08 
  -6 -10   1    5.48    1.78 
   6 -10  -1    8.14    1.62 
  -6  10   1    3.46    1.44 
  -6  10   1    6.91    1.53 
   6  10  -1    6.28    1.61 
   6  10  -1    5.14    1.51 
  -6  10   1    7.23    1.41 
   6  10  -1    7.28    1.71 
   5 -10  -1  162.15    7.65 
   5 -10  -1  152.01    7.40 
   5 -10  -1  157.54    7.04 
  -5 -10   1  163.37    7.52 
   5 -10  -1  158.73    7.16 
  -5 -10   1  156.54    7.28 
  -5  10   1  154.62    7.14 
   5  10  -1  170.39    7.55 
   5  10  -1  167.52    7.18 
   5  10  -1  161.90    7.15 
  -5  10   1  159.77    7.06 
  -5  10   1  153.73    6.81 
   5  10  -1  166.89    7.14 
   4 -10  -1  134.95    6.15 
  -4 -10   1  136.29    6.38 
  -4 -10   1  146.47    6.58 
   4 -10  -1  142.31    6.53 
   4 -10  -1  138.55    6.63 
  -4  10   1  130.28    5.83 
   4  10  -1  138.46    6.20 
  -4  10   1  138.19    6.23 
   4  10  -1  139.29    6.55 
   4  10  -1  139.64    6.22 
  -4  10   1  140.02    6.12 
   4  10  -1  142.50    6.14 
  -3 -10   1   36.02    2.73 
   3 -10  -1   34.75    2.58 
   3 -10  -1   32.21    2.40 
   3 -10  -1   38.32    2.84 
   3 -10  -1   30.12    1.89 
  -3 -10   1   36.31    2.58 
   3  10  -1   33.42    2.36 
   3  10  -1   35.40    2.18 
   3  10  -1   35.83    2.52 
  -3  10   1   36.06    2.37 
   3  10  -1   32.85    2.29 
  -3  10   1   36.15    2.28 
  -3  10   1   34.57    1.82 
  -2 -10   1   87.68    4.03 
   2 -10  -1   73.42    3.47 
  -2 -10   1   87.95    4.15 
   2 -10  -1   76.96    3.86 
  -2 -10   1   84.51    4.01 
   2 -10  -1   79.48    4.12 
   2 -10  -1   80.76    4.17 
   2  10  -1   81.44    3.95 
   2  10  -1   78.46    3.81 
   2  10  -1   85.38    3.80 
  -2  10   1   87.62    3.85 
  -2  10   1   78.85    3.46 
   2  10  -1   78.58    3.90 
  -2  10   1   79.56    3.87 
  -1 -10   1  109.93    4.58 
   1 -10  -1  108.42    5.11 
   1 -10  -1  109.13    4.55 
  -1 -10   1  108.58    4.98 
   1 -10  -1  107.87    4.72 
   1 -10  -1  108.18    4.95 
  -1 -10   1  112.20    5.01 
   1 -10  -1  108.07    4.72 
  -1 -10   1  100.13    4.73 
  -1  10   1  113.70    4.83 
   1  10  -1   99.83    4.51 
  -1  10   1  105.45    4.63 
  -1  10   1  103.01    4.70 
   1  10  -1  110.16    4.73 
   1  10  -1  106.99    4.88 
  -1  10   1  111.21    4.85 
  -1  10   1  110.93    4.56 
   1  10  -1  113.82    4.87 
   0 -10  -1  184.32    7.86 
   0 -10   1  165.27    7.65 
   0 -10   1  187.81    7.94 
   0 -10   1  184.99    7.77 
   0 -10   1  182.84    7.69 
   0 -10   1  196.80    8.06 
   0 -10  -1  195.69    8.08 
   0 -10   1  193.49    7.91 
   0 -10  -1  191.09    7.89 
   0  10   1  201.46    8.00 
   0  10   1  195.41    7.96 
   0  10   1  194.85    7.78 
   0  10   1  198.00    7.76 
   0  10  -1  197.35    8.05 
   0  10  -1  176.90    7.66 
   0  10  -1  196.13    7.81 
   0  10   1  199.27    7.90 
   0  10  -1  190.75    8.02 
   1 -10   1    6.15    1.17 
  -1 -10  -1    8.47    0.80 
   1 -10   1    9.19    1.52 
  -1 -10  -1    5.99    1.28 
  -1 -10  -1    6.33    1.38 
   1 -10   1    6.12    1.44 
  -1 -10  -1    6.58    1.08 
   1 -10   1    6.10    0.89 
  -1  10  -1    7.46    0.99 
  -1  10  -1    9.18    1.57 
   1  10   1    6.14    0.72 
   1  10   1    9.67    1.37 
   1  10   1   11.17    1.42 
   1  10   1    7.28    1.14 
   1  10   1    5.76    0.91 
  -1  10  -1    8.44    1.31 
   2 -10   1   23.04    2.10 
  -2 -10  -1   26.69    2.06 
   2 -10   1   21.99    1.71 
   2 -10   1   20.73    1.92 
   2 -10   1   19.20    1.89 
  -2 -10  -1   19.20    1.23 
  -2 -10  -1   22.48    1.98 
   2  10   1   15.88    1.18 
   2  10   1   27.13    1.97 
  -2  10  -1   21.22    1.58 
  -2  10  -1   22.75    1.95 
  -2  10  -1   19.64    1.90 
   2  10   1   21.59    1.68 
   2  10   1   19.68    2.04 
  -3 -10  -1  249.81   10.82 
  -3 -10  -1  261.63   10.71 
  -3 -10  -1  244.16   10.41 
   3 -10   1  266.79   10.56 
   3 -10   1  254.99   11.10 
  -3 -10  -1  267.55   11.13 
   3 -10   1  247.17   10.81 
   3 -10   1  271.09   11.13 
  -3  10  -1  244.39   10.33 
   3  10   1  264.62   10.88 
  -3  10  -1  260.60   11.04 
  -3  10  -1  252.53   10.34 
  -3  10  -1  269.07   10.56 
   3  10   1  277.62   11.25 
   3  10   1  253.39   10.45 
   3  10   1  269.88   10.73 
  -3  10  -1  273.24   10.84 
   4 -10   1  183.63    8.34 
   4 -10   1  193.83    8.04 
   4 -10   1  196.47    7.70 
  -4 -10  -1  183.53    7.80 
  -4 -10  -1  183.19    8.36 
   4 -10   1  180.98    8.37 
  -4 -10  -1  182.15    8.02 
   4  10   1  180.07    7.97 
   4  10   1  193.19    8.52 
  -4  10  -1  181.49    8.27 
  -4  10  -1  177.21    7.53 
   4  10   1  180.27    7.72 
  -4  10  -1  187.95    7.98 
   4  10   1  186.39    7.90 
  -4  10  -1  185.79    7.71 
  -4  10  -1  152.91    7.95 
   5 -10   1    1.42    1.70 
   5 -10   1    4.48    1.65 
  -5 -10  -1    1.01    1.49 
   5 -10   1    9.43    2.24 
  -5 -10  -1    4.59    1.79 
  -5 -10  -1    2.25    1.29 
   5  10   1    4.97    1.53 
   5  10   1    2.18    1.74 
  -5  10  -1    2.26    1.60 
  -5  10  -1    2.11    1.22 
  -5  10  -1    3.84    1.13 
   5  10   1    1.89    1.39 
   5  10   1    4.15    1.38 
  -5  10  -1    3.43    1.38 
   6 -10   1   74.12    4.30 
  -6 -10  -1   76.88    4.39 
   6 -10   1   77.40    4.92 
   6 -10   1   69.34    4.99 
  -6 -10  -1   73.35    4.73 
  -6 -10  -1   74.57    3.95 
  -6  10  -1   72.28    4.96 
  -6  10  -1   77.08    3.95 
   6  10   1   71.20    4.17 
   6  10   1   66.68    4.29 
   6  10   1   68.07    4.98 
  -6  10  -1   69.75    4.21 
  -6  10  -1   78.00    4.04 
   6  10   1   74.44    4.48 
   7 -10   1   73.21    4.63 
   7 -10   1   69.54    4.54 
   7 -10   1   69.46    5.28 
  -7 -10  -1   63.51    5.01 
  -7 -10  -1   73.74    4.43 
  -7 -10  -1   72.46    4.87 
   7 -10   1   65.07    5.16 
  -7  10  -1   67.51    4.21 
   7  10   1   66.21    4.70 
   7  10   1   75.64    5.39 
   7  10   1   72.11    4.84 
  -7  10  -1   69.14    4.15 
  -7  10  -1   77.51    5.54 
   7  10   1   73.31    4.57 
  -7  10  -1   74.15    4.33 
   8 -10   1   38.69    3.49 
  -8 -10  -1   36.63    3.11 
   8 -10   1   35.90    4.27 
  -8 -10  -1   35.55    3.70 
   8 -10   1   38.20    3.62 
  -8 -10  -1   34.73    4.00 
   8 -10   1   36.23    4.01 
   8  10   1   32.71    3.18 
  -8  10  -1   29.63    3.43 
  -8  10  -1   36.25    3.39 
  -8  10  -1   33.54    3.09 
   8  10   1   32.30    3.57 
   8  10   1   32.69    3.79 
   8  10   1   38.69    4.44 
  -8  10  -1   38.12    4.45 
  -9 -10  -1    8.16    3.22 
  -9 -10  -1    3.70    2.55 
   9 -10   1    6.55    2.72 
   9 -10   1    6.13    3.48 
  -9 -10  -1    7.20    2.55 
   9 -10   1    9.67    2.99 
   9 -10   1    7.77    3.32 
  -9  10  -1    5.40    3.31 
   9  10   1   -0.15    2.59 
   9  10   1    7.04    2.45 
   9  10   1    5.64    3.13 
  -9  10  -1    4.02    2.33 
  -9  10  -1    4.01    2.16 
  10 -10   1   24.86    4.48 
 -10 -10  -1   20.70    3.80 
 -10 -10  -1   24.18    4.37 
  10 -10   1   25.51    4.70 
 -10 -10  -1   21.80    3.86 
  10  10   1   24.18    3.67 
 -10  10  -1   21.87    3.10 
  10  10   1   27.95    4.10 
 -10  10  -1   22.69    4.17 
 -10  10  -1   26.24    5.31 
  11 -10   1   32.39    5.86 
  11 -10   1   37.73    5.62 
 -11 -10  -1   30.86    5.25 
 -11 -10  -1   35.88    4.85 
 -11 -10  -1   36.97    4.68 
  11  10   1   33.27    4.38 
  11  10   1   44.59    5.01 
 -11  10  -1   36.16    6.39 
 -11  10  -1   33.83    5.22 
 -11  10  -1   35.54    5.58 
  12 -11  -1    8.67    4.44 
 -12  11   1    4.34    3.52 
  12  11  -1    1.22    3.65 
 -11 -11   1    3.04    3.32 
  11 -11  -1    1.25    3.00 
  11 -11  -1   -1.14    3.52 
  11 -11  -1    4.30    3.45 
 -11 -11   1    6.09    3.61 
 -11 -11   1    4.37    2.88 
  11  11  -1    1.64    3.14 
  11  11  -1   -0.86    2.71 
 -11  11   1    3.13    3.97 
 -11  11   1    3.40    3.05 
 -11  11   1    1.34    2.78 
  10 -11  -1    5.85    3.22 
  10 -11  -1    1.93    3.25 
 -10 -11   1    2.12    2.43 
  10 -11  -1   -1.17    2.46 
 -10 -11   1    5.50    3.12 
 -10 -11   1    2.23    2.53 
 -10  11   1    2.37    2.35 
 -10  11   1    4.11    3.75 
  10  11  -1    2.58    2.92 
  10  11  -1   -1.58    2.54 
  10  11  -1    0.39    2.36 
 -10  11   1   -2.34    3.17 
   9 -11  -1    1.50    2.12 
   9 -11  -1    1.97    2.72 
   9 -11  -1    0.38    2.79 
  -9 -11   1    1.95    2.25 
  -9 -11   1   -2.12    2.10 
  -9 -11   1   -3.29    2.46 
  -9  11   1    3.75    2.21 
   9  11  -1    6.14    2.61 
  -9  11   1    1.00    2.07 
   9  11  -1   -0.52    2.38 
   9  11  -1   -0.48    1.98 
   8 -11  -1    3.74    2.04 
   8 -11  -1    4.88    2.56 
  -8 -11   1    4.91    2.49 
   8 -11  -1    5.43    2.51 
  -8 -11   1    0.71    2.01 
   8 -11  -1    0.92    1.84 
  -8 -11   1    2.87    1.94 
   8  11  -1    1.35    1.90 
  -8  11   1    1.87    1.66 
   8  11  -1    2.52    2.22 
   8  11  -1    2.15    2.08 
  -8  11   1    0.60    1.87 
  -8  11   1    1.43    1.86 
   7 -11  -1    2.86    1.96 
   7 -11  -1    5.51    2.25 
  -7 -11   1    1.78    2.02 
   7 -11  -1    1.11    1.70 
   7 -11  -1    2.78    1.66 
  -7 -11   1    2.37    1.94 
   7  11  -1    3.37    1.73 
   7  11  -1    0.61    1.62 
  -7  11   1    3.19    1.68 
   7  11  -1    4.42    1.82 
  -7  11   1    1.20    1.42 
  -7  11   1    3.00    1.70 
  -6 -11   1    3.83    1.78 
   6 -11  -1    1.69    1.94 
  -6 -11   1    0.26    1.69 
   6 -11  -1    2.51    1.54 
   6 -11  -1    5.93    1.88 
   6 -11  -1    3.26    1.52 
   6  11  -1    4.26    1.54 
  -6  11   1    5.00    1.52 
   6  11  -1    3.35    1.65 
  -6  11   1    4.94    1.47 
  -6  11   1    2.94    1.21 
   6  11  -1    3.10    1.52 
   5 -11  -1   -1.12    1.34 
   5 -11  -1    0.76    1.83 
   5 -11  -1   -0.22    1.35 
  -5 -11   1    0.71    1.53 
  -5 -11   1    5.50    1.69 
  -5  11   1    0.90    1.20 
   5  11  -1    1.22    1.20 
  -5  11   1   -0.73    0.90 
   5  11  -1    0.45    1.28 
  -5  11   1   -0.41    1.22 
   5  11  -1    0.17    1.55 
   5  11  -1    0.86    1.27 
  -4 -11   1    4.72    1.59 
   4 -11  -1    6.08    1.88 
  -4 -11   1    5.98    1.71 
   4 -11  -1    5.20    1.40 
   4 -11  -1    4.04    1.47 
  -4  11   1    5.36    1.24 
   4  11  -1    3.54    1.25 
  -4  11   1    2.70    1.28 
   4  11  -1    4.84    1.37 
  -4  11   1    4.23    0.89 
   4  11  -1    5.00    1.35 
   4  11  -1    3.26    1.55 
  -3 -11   1   14.46    1.88 
  -3 -11   1   13.26    1.53 
   3 -11  -1    8.38    1.45 
  -3 -11   1    9.98    1.68 
   3 -11  -1    6.10    1.65 
   3 -11  -1    9.83    1.05 
   3 -11  -1    8.87    1.81 
  -3  11   1    8.74    0.92 
   3  11  -1    9.99    1.42 
   3  11  -1    8.26    1.41 
   3  11  -1   10.09    1.30 
   3  11  -1    8.71    1.57 
  -3  11   1    9.23    1.31 
  -3  11   1    6.74    1.29 
  -2 -11   1    1.91    1.22 
   2 -11  -1    2.20    1.10 
   2 -11  -1   -0.03    1.36 
  -2 -11   1   -0.23    1.36 
   2 -11  -1    4.22    1.53 
  -2 -11   1    1.52    1.46 
   2 -11  -1    1.17    0.71 
  -2  11   1    1.99    1.08 
  -2  11   1    2.56    1.03 
   2  11  -1   -0.34    0.97 
   2  11  -1    1.99    1.06 
  -2  11   1    1.26    0.68 
   2  11  -1    3.68    1.19 
  -2  11   1    2.67    1.10 
   2  11  -1    0.94    1.12 
   1 -11  -1    2.30    0.81 
  -1 -11   1    1.54    1.43 
   1 -11  -1    1.20    1.11 
   1 -11  -1    1.77    1.58 
  -1 -11   1    0.37    1.42 
  -1 -11   1    1.87    1.04 
   1 -11  -1    0.44    1.27 
  -1 -11   1   -0.37    0.89 
   1 -11  -1    1.09    0.91 
  -1  11   1    1.83    0.76 
   1  11  -1    1.88    1.20 
  -1  11   1    2.76    1.14 
   1  11  -1    1.72    0.76 
  -1  11   1    2.37    0.94 
   1  11  -1    1.29    0.98 
  -1  11   1    3.40    1.15 
   1  11  -1    2.08    1.11 
   0 -11  -1   13.86    1.75 
   0 -11   1   14.30    1.71 
   0 -11   1   16.83    1.54 
   0 -11  -1   14.71    1.50 
   0 -11   1   10.98    1.06 
   0 -11   1   13.89    1.23 
   0 -11  -1   10.79    1.45 
   0 -11   1   12.84    1.54 
   0  11  -1   15.60    1.40 
   0  11   1   15.97    1.50 
   0  11   1   14.65    1.53 
   0  11  -1   13.83    1.20 
   0  11   1   13.52    1.34 
   0  11   1   17.14    1.34 
   0  11   1   13.48    1.20 
   0  11  -1   16.35    1.68 
   0  11  -1   12.85    1.53 
   1 -11   1    0.69    1.10 
  -1 -11  -1    0.03    1.15 
   1 -11   1   -1.13    1.26 
  -1 -11  -1   -0.29    0.62 
  -1 -11  -1    2.05    1.36 
  -1 -11  -1    0.56    0.93 
   1 -11   1    2.92    1.36 
  -1  11  -1   -0.18    1.21 
   1  11   1    0.60    1.06 
   1  11   1    1.43    1.17 
   1  11   1    0.01    0.76 
   1  11   1    1.54    0.70 
   1  11   1    0.69    0.67 
  -1  11  -1    0.35    0.91 
  -1  11  -1    2.74    1.18 
   1  11   1    0.90    1.18 
   2 -11   1   10.65    1.30 
   2 -11   1    7.03    1.56 
   2 -11   1   10.45    1.73 
  -2 -11  -1    9.62    1.55 
  -2 -11  -1   13.29    1.57 
  -2 -11  -1   11.29    0.96 
   2 -11   1   11.84    1.76 
   2  11   1    9.23    1.41 
   2  11   1    7.81    0.86 
  -2  11  -1   12.74    1.15 
   2  11   1   12.56    1.73 
  -2  11  -1    9.07    1.62 
   2  11   1   12.41    1.40 
  -2  11  -1    9.31    1.40 
   3 -11   1    2.69    1.11 
   3 -11   1    4.40    1.51 
  -3 -11  -1    5.72    1.30 
  -3 -11  -1    4.85    1.42 
  -3 -11  -1    3.00    0.76 
   3 -11   1    3.75    1.41 
   3 -11   1    4.34    1.77 
  -3 -11  -1    2.60    1.40 
   3  11   1    5.43    1.37 
  -3  11  -1    4.31    1.25 
   3  11   1    2.76    1.53 
  -3  11  -1    3.93    1.38 
  -3  11  -1    5.98    1.06 
   3  11   1    3.34    1.21 
   3  11   1    3.64    0.87 
  -4 -11  -1   10.67    1.50 
   4 -11   1    9.78    1.34 
   4 -11   1   11.46    2.04 
  -4 -11  -1   11.46    1.94 
   4 -11   1   10.58    1.84 
   4 -11   1    8.59    1.80 
  -4 -11  -1    8.20    1.68 
   4  11   1    9.98    1.29 
  -4  11  -1    8.76    1.28 
   4  11   1    7.62    1.53 
  -4  11  -1    9.08    1.54 
  -4  11  -1    6.48    1.72 
   4  11   1   13.19    2.14 
  -4  11  -1    8.07    1.02 
   4  11   1    9.52    1.52 
  -4  11  -1   10.60    1.04 
  -5 -11  -1   -1.83    1.49 
  -5 -11  -1   -1.09    1.23 
   5 -11   1    0.81    1.56 
   5 -11   1    0.61    1.83 
   5 -11   1    2.84    1.70 
  -5 -11  -1    2.89    1.75 
  -5  11  -1    1.13    1.16 
   5  11   1    0.72    1.39 
   5  11   1    2.90    1.36 
   5  11   1   -1.16    1.68 
  -5  11  -1   -0.74    1.24 
  -5  11  -1   -1.17    1.52 
  -5  11  -1   -0.51    0.98 
   5  11   1   -1.09    1.25 
  -6 -11  -1    0.82    1.89 
  -6 -11  -1   -0.09    1.41 
   6 -11   1    0.27    1.67 
  -6 -11  -1    1.66    1.78 
   6 -11   1    1.84    2.18 
   6 -11   1   -0.80    1.95 
   6  11   1    0.84    1.41 
   6  11   1    1.27    1.61 
   6  11   1    0.49    1.99 
   6  11   1    2.70    1.62 
  -6  11  -1   -0.19    1.45 
  -6  11  -1    2.32    1.40 
  -6  11  -1    4.09    1.33 
  -6  11  -1    0.93    1.96 
  -7 -11  -1   20.81    3.11 
   7 -11   1   28.05    3.52 
  -7 -11  -1   21.55    2.83 
   7 -11   1   25.13    3.32 
  -7 -11  -1   18.89    2.39 
   7 -11   1   23.75    2.85 
   7  11   1   21.22    2.57 
  -7  11  -1   18.80    2.33 
  -7  11  -1   17.24    2.55 
  -7  11  -1   19.49    2.28 
   7  11   1   18.86    2.65 
   7  11   1   20.46    2.84 
  -7  11  -1   18.74    3.27 
   7  11   1   24.52    3.39 
   8 -11   1    4.33    2.50 
  -8 -11  -1    5.50    2.53 
   8 -11   1    5.15    2.94 
  -8 -11  -1    2.01    1.94 
   8 -11   1    5.07    2.86 
  -8 -11  -1    2.91    2.62 
   8  11   1    3.48    2.08 
  -8  11  -1    5.69    2.09 
  -8  11  -1    2.21    2.04 
   8  11   1    0.68    2.65 
  -8  11  -1    4.22    3.02 
   8  11   1    4.48    2.35 
   8  11   1    3.74    2.32 
  -9 -11  -1    3.69    2.51 
   9 -11   1    7.47    3.54 
   9 -11   1    1.21    2.36 
  -9 -11  -1   -1.68    2.96 
  -9 -11  -1    1.81    2.52 
   9 -11   1    2.62    3.32 
   9  11   1    1.84    2.66 
  -9  11  -1    0.45    2.22 
  -9  11  -1    4.30    2.50 
   9  11   1    6.99    3.17 
  -9  11  -1    3.95    3.35 
   9  11   1    1.16    2.14 
  10 -11   1    5.03    3.47 
 -10 -11  -1    4.44    3.24 
  10 -11   1    0.38    3.54 
 -10 -11  -1    1.01    3.39 
 -10 -11  -1   -0.40    2.94 
  10  11   1    3.04    3.04 
 -10  11  -1    4.14    2.40 
 -10  11  -1    1.35    2.68 
 -10  11  -1    5.45    3.84 
  10  11   1    0.40    2.65 
 -11 -11  -1    5.09    3.77 
  11 -11   1   -0.15    4.05 
 -11 -11  -1    1.36    3.20 
  11 -11   1    3.20    4.43 
 -11 -11  -1   -0.97    3.24 
  11  11   1   -0.76    3.43 
 -11  11  -1    5.84    4.76 
 -11  11  -1    6.37    3.62 
  11  11   1    5.55    3.16 
 -11  11  -1    2.73    3.57 
  12 -11   1   -0.30    4.53 
 -12  11  -1    3.52    4.20 
  12 -12  -1   20.44    5.01 
 -12  12   1   24.58    4.37 
 -11 -12   1   17.86    3.26 
  11 -12  -1   17.41    3.67 
 -11 -12   1    8.86    3.25 
 -11 -12   1   12.91    3.96 
  11 -12  -1   17.15    4.45 
  11 -12  -1    9.79    4.02 
 -11  12   1   16.37    3.47 
 -11  12   1    9.28    3.20 
  11  12  -1   16.48    3.64 
  11  12  -1    8.98    3.48 
 -11  12   1   11.86    4.62 
  10 -12  -1   -0.84    2.57 
 -10 -12   1    1.38    2.37 
  10 -12  -1    2.05    3.24 
  10 -12  -1    0.57    3.01 
 -10 -12   1    2.62    2.96 
 -10 -12   1    3.65    2.72 
 -10  12   1    7.77    3.61 
 -10  12   1   -0.18    2.36 
  10  12  -1    3.71    2.62 
 -10  12   1    7.03    2.57 
  10  12  -1    1.15    2.36 
  10  12  -1    3.47    3.07 
  -9 -12   1   37.87    3.87 
  -9 -12   1   41.17    4.44 
   9 -12  -1   31.23    3.59 
   9 -12  -1   24.94    3.90 
   9 -12  -1   32.67    4.22 
  -9 -12   1   29.48    3.43 
   9  12  -1   30.66    3.67 
  -9  12   1   32.25    3.34 
   9  12  -1   34.26    3.85 
   9  12  -1   38.73    4.00 
  -9  12   1   29.75    3.44 
  -8 -12   1   62.59    4.71 
  -8 -12   1   70.61    5.14 
   8 -12  -1   66.19    5.19 
   8 -12  -1   59.80    4.79 
   8 -12  -1   66.71    4.33 
  -8 -12   1   63.48    4.35 
   8 -12  -1   56.97    4.55 
   8  12  -1   62.73    4.47 
  -8  12   1   58.97    4.47 
  -8  12   1   62.69    3.99 
   8  12  -1   72.66    4.43 
  -8  12   1   69.39    4.44 
   8  12  -1   60.45    4.59 
  -7 -12   1   22.16    3.03 
   7 -12  -1   16.78    2.96 
  -7 -12   1   19.30    2.68 
   7 -12  -1   17.51    2.44 
   7 -12  -1   16.10    2.61 
   7 -12  -1   19.80    2.35 
  -7  12   1   18.91    2.40 
  -7  12   1   17.27    2.25 
   7  12  -1   20.61    2.63 
   7  12  -1   24.14    2.46 
   7  12  -1   21.65    2.46 
  -7  12   1   15.17    1.94 
   6 -12  -1    5.53    1.86 
   6 -12  -1    7.51    2.17 
  -6 -12   1    9.56    2.10 
   6 -12  -1    6.12    1.70 
  -6 -12   1    7.54    1.96 
   6  12  -1    6.48    1.73 
  -6  12   1    2.55    1.22 
   6  12  -1    6.70    1.74 
  -6  12   1    6.45    1.65 
   6  12  -1    5.27    1.61 
  -6  12   1    7.22    1.64 
   5 -12  -1   47.44    3.40 
   5 -12  -1   47.52    3.18 
  -5 -12   1   45.34    3.40 
  -5 -12   1   41.80    3.39 
   5 -12  -1   52.30    3.90 
  -5  12   1   43.96    2.50 
  -5  12   1   45.70    3.10 
   5  12  -1   48.67    3.17 
  -5  12   1   48.85    3.04 
   5  12  -1   48.74    3.50 
   5  12  -1   50.74    3.12 
   5  12  -1   48.80    2.97 
  -4 -12   1  134.26    6.04 
   4 -12  -1  138.12    6.43 
  -4 -12   1  129.99    6.44 
   4 -12  -1  136.11    6.70 
   4 -12  -1  140.48    6.28 
  -4 -12   1  138.82    6.53 
   4  12  -1  138.61    6.08 
  -4  12   1  133.08    5.72 
   4  12  -1  139.35    6.55 
   4  12  -1  136.47    6.22 
  -4  12   1  138.33    6.25 
   4  12  -1  145.13    6.24 
  -4  12   1  133.75    6.11 
  -3 -12   1    3.27    1.63 
   3 -12  -1    3.27    0.87 
  -3 -12   1    0.67    1.28 
   3 -12  -1    4.39    1.36 
  -3 -12   1    5.37    1.49 
   3 -12  -1   -0.71    1.59 
   3 -12  -1    3.51    1.55 
   3  12  -1    4.71    1.27 
  -3  12   1    2.13    0.72 
  -3  12   1    2.91    1.18 
   3  12  -1    2.55    1.11 
   3  12  -1    3.68    1.39 
  -3  12   1    2.53    1.21 
   3  12  -1    1.75    1.21 
   2 -12  -1   39.12    2.52 
   2 -12  -1   40.07    2.99 
   2 -12  -1   39.53    2.03 
  -2 -12   1   41.69    2.70 
   2 -12  -1   43.54    3.03 
  -2 -12   1   40.57    2.87 
  -2 -12   1   42.70    2.95 
  -2  12   1   40.76    2.52 
   2  12  -1   42.97    2.64 
  -2  12   1   42.64    2.57 
   2  12  -1   40.84    2.63 
   2  12  -1   42.70    2.42 
   2  12  -1   42.10    2.55 
  -2  12   1   43.01    2.05 
  -2  12   1   40.23    2.59 
  -1 -12   1   75.01    3.87 
   1 -12  -1   71.19    3.71 
  -1 -12   1   69.16    3.31 
   1 -12  -1   71.30    3.41 
   1 -12  -1   72.41    3.25 
   1 -12  -1   74.72    3.50 
   1 -12  -1   74.36    3.97 
  -1 -12   1   73.42    3.82 
  -1 -12   1   64.27    3.47 
  -1  12   1   74.44    3.62 
   1  12  -1   72.87    3.55 
   1  12  -1   71.77    3.52 
  -1  12   1   71.16    3.63 
  -1  12   1   71.76    3.46 
  -1  12   1   67.14    3.24 
   1  12  -1   71.18    3.69 
   0 -12  -1   82.13    3.94 
   0 -12   1   76.17    3.62 
   0 -12   1   83.10    4.03 
   0 -12  -1   79.50    3.72 
   0 -12   1   83.40    4.16 
   0 -12   1   79.19    3.63 
   0 -12  -1   83.25    4.23 
   0 -12  -1   78.03    3.87 
   0 -12   1   80.29    3.96 
   0  12   1   84.24    3.72 
   0  12  -1   81.44    3.85 
   0  12   1   89.93    3.79 
   0  12  -1   88.16    4.16 
   0  12   1   85.44    3.89 
   0  12   1   84.50    4.01 
   0  12   1   81.48    4.04 
   0  12  -1   85.69    4.08 
  -1 -12  -1    2.32    1.00 
  -1 -12  -1   -0.25    1.24 
  -1 -12  -1    1.76    1.39 
  -1 -12  -1    2.12    0.71 
   1 -12   1    1.41    1.39 
   1 -12   1    0.01    1.33 
   1 -12   1    0.98    1.19 
   1  12   1    2.26    0.71 
   1  12   1    0.99    0.79 
   1  12   1    0.17    1.10 
  -1  12  -1   -0.16    1.23 
  -1  12  -1    3.76    1.03 
   1  12   1    0.37    0.72 
   1  12   1    0.54    1.17 
   1  12   1    0.82    1.24 
  -1  12  -1    4.93    1.29 
  -2 -12  -1   68.55    2.95 
   2 -12   1   68.11    3.34 
  -2 -12  -1   66.59    3.60 
   2 -12   1   70.34    3.89 
   2 -12   1   64.22    3.79 
  -2 -12  -1   68.32    3.62 
   2 -12   1   60.76    3.68 
   2  12   1   69.47    3.61 
   2  12   1   67.05    3.48 
  -2  12  -1   63.04    3.70 
  -2  12  -1   74.25    3.59 
   2  12   1   76.18    3.96 
  -2  12  -1   74.24    3.25 
   2  12   1   58.81    2.92 
  -3 -12  -1  127.32    5.91 
   3 -12   1  131.05    6.42 
  -3 -12  -1  132.09    6.33 
   3 -12   1  127.92    6.34 
  -3 -12  -1  130.92    6.05 
   3 -12   1  134.58    5.74 
   3 -12   1  125.79    6.09 
   3  12   1  134.92    6.05 
  -3  12  -1  139.30    6.03 
   3  12   1  115.97    5.46 
   3  12   1  145.01    6.47 
  -3  12  -1  127.80    6.30 
  -3  12  -1  140.57    5.70 
   3  12   1  135.32    5.92 
   4 -12   1   98.78    5.46 
   4 -12   1  109.65    5.61 
   4 -12   1   99.40    5.10 
  -4 -12  -1  107.07    4.92 
  -4 -12  -1  103.57    5.18 
  -4 -12  -1  103.33    5.45 
  -4  12  -1   99.65    4.42 
   4  12   1   99.12    4.65 
  -4  12  -1  102.77    4.74 
   4  12   1  103.60    5.07 
  -4  12  -1  101.09    4.41 
   4  12   1  112.83    5.62 
   4  12   1  109.49    5.01 
  -4  12  -1  101.06    5.44 
  -4  12  -1  110.53    5.12 
  -5 -12  -1   -1.37    1.61 
   5 -12   1    0.50    1.67 
  -5 -12  -1    2.27    1.38 
   5 -12   1    1.14    1.92 
   5 -12   1   -1.27    1.61 
  -5 -12  -1    2.56    1.76 
   5  12   1   -0.47    1.23 
   5  12   1    0.70    1.49 
  -5  12  -1   -0.68    1.18 
   5  12   1    2.49    1.87 
  -5  12  -1   -1.15    1.31 
  -5  12  -1    3.51    1.80 
  -5  12  -1    2.55    0.99 
   5  12   1    2.43    1.35 
  -6 -12  -1   41.65    3.67 
  -6 -12  -1   44.72    3.58 
   6 -12   1   41.74    3.42 
   6 -12   1   36.46    3.60 
   6 -12   1   45.61    3.91 
  -6 -12  -1   41.11    2.98 
  -6  12  -1   37.24    2.66 
  -6  12  -1   41.77    2.98 
   6  12   1   43.45    3.34 
   6  12   1   45.65    3.22 
   6  12   1   39.87    3.24 
  -6  12  -1   42.67    3.95 
   6  12   1   41.26    3.86 
  -6  12  -1   42.22    3.31 
   7 -12   1   53.59    4.28 
   7 -12   1   58.23    5.20 
   7 -12   1   62.66    5.08 
  -7 -12  -1   61.81    4.59 
  -7 -12  -1   63.44    3.93 
  -7 -12  -1   55.64    4.70 
  -7  12  -1   58.77    3.84 
  -7  12  -1   54.40    3.63 
   7  12   1   62.04    4.46 
  -7  12  -1   55.62    4.14 
  -7  12  -1   57.30    5.15 
   7  12   1   52.29    4.80 
   7  12   1   54.47    4.32 
   7  12   1   55.39    3.96 
   8 -12   1   19.33    3.73 
  -8 -12  -1   18.02    3.05 
  -8 -12  -1   26.71    3.31 
   8 -12   1   25.23    3.48 
   8 -12   1   24.08    3.93 
  -8 -12  -1   27.39    3.81 
   8  12   1   28.50    4.18 
   8  12   1   26.46    3.83 
   8  12   1   22.06    3.21 
  -8  12  -1   29.53    2.88 
  -8  12  -1   16.34    2.75 
   8  12   1   24.86    3.28 
  -8  12  -1   22.17    3.92 
  -9 -12  -1    1.23    2.61 
  -9 -12  -1    0.93    2.91 
   9 -12   1    0.86    2.58 
   9 -12   1    0.93    3.34 
  -9 -12  -1    3.84    2.53 
   9 -12   1    0.90    3.15 
   9  12   1    0.01    3.03 
   9  12   1    3.58    2.70 
  -9  12  -1    1.87    2.24 
   9  12   1   -1.45    2.18 
  -9  12  -1    0.76    2.58 
  -9  12  -1    0.50    3.39 
  10 -12   1   29.77    5.68 
 -10 -12  -1   31.06    4.21 
  10 -12   1   32.56    4.95 
 -10 -12  -1   31.54    4.73 
 -10 -12  -1   21.99    4.03 
 -10  12  -1   34.01    3.65 
  10  12   1   21.51    4.16 
  10  12   1   26.56    4.23 
 -10  12  -1   37.67    5.93 
 -10  12  -1   30.03    3.86 
  11 -12   1   20.64    5.34 
  11 -12   1   28.41    5.38 
 -11 -12  -1   31.26    4.88 
 -11 -12  -1   23.54    4.36 
 -11 -12  -1   27.14    5.05 
 -11  12  -1   38.05    4.03 
  11  12   1   34.09    4.53 
  11  12   1   33.87    4.58 
 -11  12  -1   28.69    4.40 
 -11  12  -1   37.74    6.14 
  12 -12   1    3.65    4.91 
  12 -13  -1    5.16    4.49 
 -12  13   1    5.71    3.94 
  11 -13  -1   21.60    4.61 
 -11 -13   1   28.12    4.69 
  11 -13  -1   25.38    4.68 
 -11 -13   1   21.99    3.96 
 -11 -13   1   23.21    3.68 
  11  13  -1   23.13    3.68 
  11  13  -1   22.53    4.09 
 -11  13   1   31.14    4.02 
 -11  13   1   20.61    5.05 
 -10 -13   1   66.78    5.64 
 -10 -13   1   70.77    5.83 
 -10 -13   1   79.73    6.51 
  10 -13  -1   63.36    6.20 
  10 -13  -1   84.84    6.88 
 -10  13   1   67.85    5.52 
 -10  13   1   81.88    5.51 
  10  13  -1   68.19    5.52 
  10  13  -1   77.75    5.70 
 -10  13   1   82.36    6.92 
  -9 -13   1   55.44    4.90 
  -9 -13   1   64.02    5.65 
   9 -13  -1   68.26    5.75 
   9 -13  -1   58.96    5.33 
  -9 -13   1   69.03    5.17 
   9  13  -1   69.54    5.25 
   9  13  -1   60.76    4.99 
  -9  13   1   71.40    4.97 
  -9  13   1   68.43    4.83 
   9  13  -1   64.60    4.95 
  -9  13   1   67.54    6.04 
   8 -13  -1   13.52    3.03 
   8 -13  -1    7.53    2.62 
   8 -13  -1    7.36    2.23 
  -8 -13   1   11.33    2.62 
  -8 -13   1    8.48    2.75 
  -8  13   1    4.88    2.15 
  -8  13   1    6.27    2.23 
   8  13  -1   10.72    2.24 
   8  13  -1    4.63    2.22 
   8  13  -1    8.40    2.24 
   7 -13  -1  108.96    5.55 
  -7 -13   1   99.28    5.93 
   7 -13  -1  105.23    6.18 
  -7 -13   1  102.54    6.20 
   7 -13  -1  100.79    6.38 
  -7  13   1  117.03    5.75 
   7  13  -1  116.91    5.60 
  -7  13   1  103.04    5.56 
   7  13  -1  103.72    5.80 
   7  13  -1  102.95    5.70 
  -7  13   1  108.88    5.19 
   6 -13  -1  100.49    5.86 
   6 -13  -1  108.81    5.40 
   6 -13  -1  117.40    6.18 
  -6 -13   1  113.60    5.99 
  -6 -13   1  107.14    5.75 
   6  13  -1  111.81    5.60 
  -6  13   1  106.79    5.55 
   6  13  -1  108.72    5.59 
  -6  13   1  102.51    4.90 
  -6  13   1  107.49    5.38 
   6  13  -1  110.22    5.44 
   5 -13  -1   11.11    1.96 
   5 -13  -1   13.69    2.02 
  -5 -13   1   14.31    2.18 
  -5 -13   1   13.55    2.19 
   5 -13  -1   11.15    2.37 
   5  13  -1   12.51    2.22 
  -5  13   1   11.73    1.27 
   5  13  -1   15.67    1.87 
  -5  13   1   11.52    1.70 
   5  13  -1   15.16    1.93 
  -5  13   1   12.18    1.68 
   5  13  -1   13.97    1.86 
  -4 -13   1   19.12    2.22 
  -4 -13   1   24.70    2.02 
   4 -13  -1   21.33    2.22 
  -4 -13   1   23.75    2.42 
   4 -13  -1   18.11    2.37 
   4 -13  -1   20.28    2.16 
  -4  13   1   19.13    1.43 
  -4  13   1   19.71    1.85 
   4  13  -1   21.04    1.94 
  -4  13   1   19.52    1.96 
   4  13  -1   18.47    1.95 
   4  13  -1   19.05    2.25 
   4  13  -1   19.58    1.98 
   3 -13  -1  357.92   14.93 
   3 -13  -1  353.91   15.12 
   3 -13  -1  339.21   14.43 
   3 -13  -1  368.79   15.07 
  -3 -13   1  363.98   14.82 
  -3 -13   1  366.80   15.04 
  -3  13   1  365.78   15.04 
  -3  13   1  362.73   14.89 
   3  13  -1  371.12   14.75 
   3  13  -1  378.85   15.08 
   3  13  -1  365.23   14.88 
  -3  13   1  362.36   14.75 
   3  13  -1  373.10   14.85 
  -3  13   1  358.51   14.40 
   2 -13  -1  275.20   10.80 
   2 -13  -1  239.03   10.27 
  -2 -13   1  232.55   10.72 
   2 -13  -1  266.40   10.90 
   2 -13  -1  259.06   10.89 
  -2 -13   1  256.80   10.76 
  -2 -13   1  259.71   10.86 
   2  13  -1  267.14   10.66 
   2  13  -1  249.26   10.71 
  -2  13   1  262.31   10.64 
  -2  13   1  259.20   10.73 
   2  13  -1  265.01   10.76 
  -2  13   1  238.60   10.70 
  -2  13   1  264.15   10.30 
   2  13  -1  265.83   10.63 
  -1 -13   1   10.86    1.42 
   1 -13  -1   11.68    1.70 
  -1 -13   1   15.04    1.34 
  -1 -13   1   11.86    1.84 
  -1 -13   1   12.60    1.83 
   1 -13  -1   11.45    1.15 
   1 -13  -1   12.04    1.99 
   1 -13  -1   11.13    1.46 
   1 -13  -1   14.10    1.47 
  -1  13   1    9.45    1.30 
   1  13  -1   12.46    1.50 
  -1  13   1   11.78    1.54 
   1  13  -1   14.77    1.49 
   1  13  -1    8.80    1.50 
  -1  13   1   11.37    1.16 
  -1  13   1   12.73    1.54 
   0 -13  -1   73.27    3.74 
   0 -13  -1   70.33    4.05 
   0 -13   1   71.82    3.41 
   0 -13   1   73.41    3.96 
   0 -13   1   76.99    3.82 
   0 -13   1   69.29    3.37 
   0 -13  -1   77.61    3.70 
   0 -13   1   75.64    3.76 
   0  13  -1   78.10    3.86 
   0  13  -1   77.59    3.91 
   0  13  -1   78.75    3.65 
   0  13   1   76.46    3.51 
   0  13   1   75.94    3.64 
   0  13   1   70.17    3.65 
   0  13   1   78.04    3.82 
   0  13   1   73.88    3.78 
   1 -13   1  317.04   13.21 
  -1 -13  -1  330.20   12.83 
   1 -13   1  306.44   12.97 
   1 -13   1  319.54   13.18 
  -1 -13  -1  303.52   13.06 
  -1 -13  -1  306.45   13.14 
  -1 -13  -1  305.60   12.82 
  -1  13  -1  330.61   13.20 
  -1  13  -1  321.33   13.31 
   1  13   1  339.04   13.22 
   1  13   1  306.14   12.75 
   1  13   1  321.76   13.10 
  -1  13  -1  323.74   12.90 
   1  13   1  336.65   12.82 
   1  13   1  325.80   13.18 
  -2 -13  -1  155.18    6.33 
   2 -13   1  156.61    7.11 
   2 -13   1  147.87    6.91 
   2 -13   1  154.92    6.62 
   2 -13   1  161.11    7.12 
  -2 -13  -1  144.88    6.84 
  -2 -13  -1  157.61    6.86 
   2  13   1  157.01    6.89 
   2  13   1  154.91    6.76 
  -2  13  -1  161.94    6.56 
  -2  13  -1  151.65    7.05 
   2  13   1  141.26    6.30 
  -2  13  -1  161.40    6.88 
   2  13   1  165.12    7.09 
  -3 -13  -1    5.21    0.87 
   3 -13   1    3.32    1.63 
  -3 -13  -1    5.95    1.58 
  -3 -13  -1    7.97    1.56 
  -3 -13  -1    4.84    1.58 
   3 -13   1    5.07    1.83 
   3 -13   1    5.71    1.26 
   3 -13   1    7.34    1.76 
  -3  13  -1    5.30    1.59 
   3  13   1    8.15    1.79 
   3  13   1    5.80    1.48 
  -3  13  -1    4.14    1.36 
   3  13   1    6.31    1.36 
   3  13   1    4.14    0.87 
  -3  13  -1    6.05    1.17 
  -4 -13  -1   62.43    3.88 
   4 -13   1   63.83    4.18 
  -4 -13  -1   70.21    3.65 
   4 -13   1   68.36    4.37 
   4 -13   1   68.69    3.96 
  -4 -13  -1   74.42    4.21 
  -4  13  -1   70.90    3.83 
   4  13   1   63.98    3.77 
   4  13   1   68.37    4.29 
  -4  13  -1   69.32    4.06 
   4  13   1   63.68    3.67 
  -4  13  -1   62.47    3.38 
   4  13   1   63.30    3.30 
   5 -13   1  166.68    7.70 
  -5 -13  -1  154.66    8.09 
  -5 -13  -1  173.87    7.86 
  -5 -13  -1  172.24    7.53 
   5 -13   1  168.49    8.42 
   5 -13   1  171.27    8.26 
  -5  13  -1  168.64    8.21 
  -5  13  -1  181.60    7.40 
  -5  13  -1  160.91    7.05 
   5  13   1  161.55    7.78 
   5  13   1  177.96    7.70 
  -5  13  -1  173.27    7.72 
   5  13   1  170.49    8.29 
   5  13   1  160.92    7.36 
   6 -13   1   68.29    4.78 
  -6 -13  -1   71.04    4.76 
  -6 -13  -1   70.10    4.09 
   6 -13   1   68.63    5.07 
   6 -13   1   70.32    4.39 
  -6 -13  -1   68.10    4.52 
   6  13   1   73.37    5.01 
   6  13   1   73.99    4.16 
   6  13   1   63.51    4.33 
  -6  13  -1   65.68    4.86 
  -6  13  -1   65.45    3.94 
  -6  13  -1   69.24    4.25 
   6  13   1   71.81    4.18 
  -6  13  -1   65.86    3.54 
  -7 -13  -1   22.04    3.07 
  -7 -13  -1   19.43    3.18 
   7 -13   1   23.38    3.52 
   7 -13   1   26.33    3.66 
   7 -13   1   21.64    2.89 
  -7 -13  -1   26.72    2.77 
   7  13   1   30.30    3.09 
   7  13   1   25.99    3.49 
  -7  13  -1   20.53    2.47 
   7  13   1   26.41    2.90 
   7  13   1   26.25    3.01 
  -7  13  -1   19.45    3.49 
  -7  13  -1   21.56    2.77 
   8 -13   1   84.71    6.44 
   8 -13   1   82.51    6.79 
  -8 -13  -1   93.79    6.43 
  -8 -13  -1   91.00    5.37 
  -8 -13  -1   84.24    5.90 
   8 -13   1   89.52    5.95 
  -8  13  -1   90.79    5.13 
   8  13   1   84.85    5.70 
   8  13   1   80.15    6.37 
  -8  13  -1   83.45    6.57 
   8  13   1   83.72    5.55 
  -8  13  -1   75.36    5.40 
  -9 -13  -1   93.43    6.54 
   9 -13   1   85.94    6.99 
   9 -13   1   89.13    5.90 
   9 -13   1   79.20    7.01 
  -9 -13  -1   85.31    6.82 
   9  13   1   90.35    5.80 
   9  13   1   74.70    6.01 
   9  13   1   77.53    6.80 
  -9  13  -1   83.56    7.29 
  -9  13  -1   81.93    6.08 
  -9  13  -1   92.54    5.44 
  10 -13   1   18.17    4.32 
  10 -13   1   21.32    4.62 
 -10 -13  -1   14.38    3.89 
 -10 -13  -1   16.26    3.67 
 -10 -13  -1   21.44    3.76 
 -10  13  -1   20.16    3.51 
  10  13   1   16.87    3.81 
  10  13   1   14.50    3.25 
 -10  13  -1   28.25    5.36 
 -10  13  -1   20.39    3.03 
 -11 -13  -1    5.45    3.68 
  11 -13   1    8.49    4.82 
  11 -13   1    3.91    4.07 
 -11 -13  -1    4.20    3.95 
 -11 -13  -1    3.96    3.45 
 -11  13  -1   10.57    4.80 
  11  13   1    6.17    3.60 
  11  13   1    5.77    3.53 
 -11  13  -1    1.55    3.04 
  12 -14  -1   16.97    5.07 
  11 -14  -1   11.19    4.22 
 -11 -14   1   10.71    3.35 
 -11 -14   1    7.21    3.48 
  11 -14  -1   11.39    4.22 
 -11 -14   1   10.30    3.45 
 -11  14   1   12.90    3.33 
 -11  14   1   17.66    4.77 
  11  14  -1    7.36    3.05 
  11  14  -1    7.80    3.46 
 -11  14   1   10.66    3.17 
  10 -14  -1    3.08    3.34 
 -10 -14   1    1.81    2.87 
 -10 -14   1    0.31    2.53 
  10 -14  -1    1.98    3.13 
 -10 -14   1   -5.18    2.60 
  10  14  -1   -0.08    2.59 
  10  14  -1    2.05    2.76 
 -10  14   1   -1.04    3.70 
 -10  14   1    4.37    2.52 
   9 -14  -1    9.83    3.33 
   9 -14  -1    8.69    3.40 
  -9 -14   1   10.06    3.13 
  -9 -14   1    6.29    2.80 
  -9 -14   1   10.06    2.60 
   9 -14  -1    6.98    2.70 
   9  14  -1    7.42    2.83 
  -9  14   1   11.23    3.53 
  -9  14   1    9.57    2.51 
  -9  14   1   14.38    2.81 
   9  14  -1    8.55    2.60 
   9  14  -1   11.67    2.79 
   8 -14  -1   29.97    3.84 
  -8 -14   1   48.63    4.25 
   8 -14  -1   42.63    3.67 
  -8 -14   1   52.60    4.69 
   8 -14  -1   42.03    4.35 
   8  14  -1   40.23    3.84 
  -8  14   1   44.52    4.50 
  -8  14   1   40.84    3.57 
   8  14  -1   43.44    3.94 
   8  14  -1   40.31    3.56 
  -8  14   1   42.37    3.55 
  -7 -14   1   28.13    3.35 
   7 -14  -1   30.58    3.55 
   7 -14  -1   24.81    2.65 
   7 -14  -1   24.50    3.25 
  -7 -14   1   21.90    3.00 
   7  14  -1   26.10    2.83 
  -7  14   1   23.09    2.15 
   7  14  -1   23.12    2.78 
  -7  14   1   23.52    2.68 
  -7  14   1   24.54    2.62 
   7  14  -1   25.27    2.72 
  -6 -14   1    0.26    1.87 
   6 -14  -1    2.15    2.29 
   6 -14  -1   -0.45    1.69 
  -6 -14   1    1.46    1.91 
   6 -14  -1    0.16    1.67 
  -6  14   1    2.55    1.54 
   6  14  -1    1.79    1.55 
   6  14  -1    0.80    1.47 
  -6  14   1   -0.81    1.00 
   6  14  -1   -1.02    1.52 
  -6  14   1   -1.53    1.46 
   5 -14  -1   44.54    3.23 
   5 -14  -1   49.79    3.90 
  -5 -14   1   43.30    3.46 
  -5 -14   1   45.66    3.53 
   5 -14  -1   39.21    3.46 
   5  14  -1   43.84    2.84 
   5  14  -1   49.16    3.50 
  -5  14   1   44.66    3.03 
   5  14  -1   41.80    3.13 
  -5  14   1   43.59    2.33 
  -5  14   1   46.82    3.16 
   5  14  -1   43.78    3.09 
  -4 -14   1  132.03    5.87 
   4 -14  -1  121.46    6.02 
  -4 -14   1  138.01    6.32 
   4 -14  -1  128.33    6.17 
   4 -14  -1  126.20    6.37 
  -4 -14   1  128.97    6.26 
   4 -14  -1  117.93    5.50 
   4  14  -1  120.23    5.75 
  -4  14   1  133.11    6.16 
  -4  14   1  122.11    5.97 
   4  14  -1  124.18    5.97 
   4  14  -1  134.42    6.27 
  -4  14   1  134.30    5.88 
  -4  14   1  125.02    5.31 
   4  14  -1  132.96    6.00 
   3 -14  -1   16.20    2.22 
  -3 -14   1   12.91    1.96 
   3 -14  -1   14.38    1.80 
  -3 -14   1   18.23    2.04 
   3 -14  -1   13.62    1.19 
  -3 -14   1   16.51    2.07 
   3 -14  -1   15.47    2.08 
  -3  14   1   14.49    1.21 
  -3  14   1   13.35    1.73 
  -3  14   1   14.85    1.80 
  -3  14   1   16.99    1.70 
   3  14  -1   11.35    1.79 
   3  14  -1   13.95    1.75 
   3  14  -1   12.30    1.52 
   3  14  -1   16.39    1.82 
   2 -14  -1    9.17    1.02 
  -2 -14   1   10.02    1.64 
   2 -14  -1   10.79    2.02 
   2 -14  -1   12.95    1.91 
   2 -14  -1   13.50    1.63 
  -2 -14   1   13.03    1.94 
  -2 -14   1   13.12    1.98 
  -2  14   1   15.66    1.63 
   2  14  -1   11.30    1.60 
  -2  14   1   13.00    1.57 
   2  14  -1   13.50    1.61 
   2  14  -1   12.63    1.51 
  -2  14   1   12.10    1.06 
   2  14  -1   13.10    1.59 
  -2  14   1   14.61    1.60 
   1 -14  -1   34.75    2.25 
  -1 -14   1   30.44    2.27 
  -1 -14   1   31.90    2.59 
   1 -14  -1   36.86    2.40 
   1 -14  -1   30.34    2.60 
   1 -14  -1   33.86    3.02 
  -1 -14   1   37.11    2.89 
  -1 -14   1   32.24    2.14 
   1  14  -1   35.66    2.43 
   1  14  -1   34.46    2.58 
  -1  14   1   37.32    2.52 
  -1  14   1   32.90    2.29 
  -1  14   1   32.87    2.52 
   1  14  -1   34.63    2.39 
  -1  14   1   34.16    2.00 
   1  14  -1   28.80    2.14 
   0 -14   1   64.08    3.51 
   0 -14  -1   65.79    3.51 
   0 -14  -1   65.87    3.44 
   0 -14   1   61.68    3.11 
   0 -14   1   60.75    3.10 
   0 -14  -1   68.83    3.86 
   0 -14   1   67.31    3.75 
   0  14   1   67.11    3.57 
   0  14  -1   70.78    3.39 
   0  14  -1   62.10    3.57 
   0  14  -1   68.20    3.58 
   0  14   1   70.02    3.37 
   0  14   1   68.26    3.35 
   0  14   1   64.03    3.54 
   1 -14   1    1.94    1.48 
   1 -14   1    2.43    1.38 
   1 -14   1    2.32    1.59 
  -1 -14  -1    5.02    0.90 
  -1 -14  -1    4.42    1.64 
  -1 -14  -1    5.52    1.17 
  -1 -14  -1    1.81    1.42 
   1  14   1    4.66    0.90 
  -1  14  -1    5.19    1.23 
   1  14   1    5.77    1.50 
   1  14   1    4.38    1.31 
  -1  14  -1    5.16    1.52 
   1  14   1    2.94    1.34 
   1  14   1    4.48    0.89 
  -1  14  -1    2.90    1.42 
  -2 -14  -1    6.44    0.82 
  -2 -14  -1    8.02    1.63 
   2 -14   1    6.57    1.40 
   2 -14   1    6.28    1.88 
   2 -14   1   10.79    1.81 
  -2 -14  -1    9.41    1.69 
   2 -14   1    3.50    1.69 
  -2  14  -1    8.91    1.28 
   2  14   1    6.06    0.89 
   2  14   1   11.06    1.79 
  -2  14  -1    5.15    1.40 
  -2  14  -1   10.16    1.73 
   2  14   1    9.31    1.47 
   2  14   1    8.38    1.60 
   3 -14   1   61.83    3.32 
   3 -14   1   66.72    4.13 
   3 -14   1   68.57    3.85 
  -3 -14  -1   61.92    3.87 
  -3 -14  -1   60.03    3.73 
   3 -14   1   59.52    3.84 
  -3 -14  -1   68.03    3.67 
  -3  14  -1   67.40    3.26 
  -3  14  -1   67.46    3.93 
   3  14   1   66.34    3.69 
   3  14   1   64.01    3.61 
   3  14   1   66.39    4.04 
   3  14   1   59.02    2.94 
  -3  14  -1   66.09    3.65 
   4 -14   1  123.84    5.83 
  -4 -14  -1  123.02    5.64 
   4 -14   1  121.54    6.18 
  -4 -14  -1  111.90    6.06 
   4 -14   1  121.75    5.35 
   4 -14   1  112.76    6.22 
  -4 -14  -1  117.89    5.86 
   4  14   1  120.70    5.63 
  -4  14  -1  114.57    6.14 
   4  14   1  124.53    6.19 
  -4  14  -1  121.77    5.38 
   4  14   1  116.81    5.75 
   4  14   1  100.34    5.11 
  -4  14  -1  125.52    5.76 
   5 -14   1    5.53    1.89 
   5 -14   1    3.17    2.14 
  -5 -14  -1    1.33    1.86 
  -5 -14  -1    3.41    1.53 
  -5 -14  -1    2.73    1.83 
   5 -14   1    1.37    1.74 
   5  14   1    4.18    2.05 
  -5  14  -1    1.20    1.51 
   5  14   1    1.11    1.36 
   5  14   1    1.20    1.62 
  -5  14  -1    0.58    1.80 
  -5  14  -1    3.06    1.36 
  -5  14  -1    0.99    0.88 
   5  14   1    1.84    1.46 
  -6 -14  -1   46.54    3.95 
   6 -14   1   34.12    3.93 
  -6 -14  -1   43.01    3.28 
  -6 -14  -1   48.97    3.91 
   6 -14   1   45.41    4.18 
   6 -14   1   40.90    3.44 
  -6  14  -1   48.85    4.26 
   6  14   1   45.47    4.21 
  -6  14  -1   40.18    3.39 
   6  14   1   41.14    3.40 
  -6  14  -1   38.24    2.68 
   6  14   1   40.18    3.34 
   6  14   1   42.15    3.14 
  -6  14  -1   41.85    3.11 
   7 -14   1   46.67    4.49 
  -7 -14  -1   41.75    3.78 
   7 -14   1   47.22    3.95 
  -7 -14  -1   42.76    4.29 
   7 -14   1   43.75    4.67 
  -7 -14  -1   55.56    4.37 
   7  14   1   45.77    3.85 
  -7  14  -1   45.70    4.84 
   7  14   1   44.49    3.78 
  -7  14  -1   43.82    3.75 
   7  14   1   53.94    4.68 
   7  14   1   43.51    3.72 
  -7  14  -1   48.74    3.53 
   8 -14   1    7.47    3.32 
   8 -14   1    7.13    3.29 
  -8 -14  -1    6.17    2.49 
   8 -14   1    8.30    2.74 
  -8 -14  -1    6.92    3.08 
  -8 -14  -1    8.94    2.89 
  -8  14  -1    4.42    2.35 
  -8  14  -1    9.57    3.39 
  -8  14  -1    7.44    2.27 
   8  14   1   10.41    3.22 
   8  14   1    9.34    2.69 
   8  14   1    8.64    2.56 
  -9 -14  -1   -1.52    3.00 
  -9 -14  -1    4.15    3.00 
   9 -14   1    4.43    2.81 
   9 -14   1    5.76    3.43 
   9 -14   1    4.04    3.56 
   9  14   1    0.56    3.09 
  -9  14  -1    4.39    2.38 
   9  14   1   -0.31    2.43 
  -9  14  -1    2.60    2.48 
  -9  14  -1    3.27    3.92 
   9  14   1   -0.38    2.74 
 -10 -14  -1    8.99    3.71 
 -10 -14  -1   12.46    3.46 
  10 -14   1   11.95    4.28 
 -10 -14  -1    9.02    3.75 
  10 -14   1   10.86    4.38 
  10  14   1    6.53    3.26 
 -10  14  -1   10.47    2.79 
 -10  14  -1    6.94    3.03 
 -10  14  -1   10.15    4.81 
  10  14   1   10.44    3.50 
  11 -14   1   19.96    5.25 
  11 -14   1   19.34    5.52 
 -11 -14  -1   20.05    4.79 
 -11 -14  -1   13.90    4.35 
 -11 -14  -1   21.30    4.25 
 -11  14  -1   18.16    5.61 
 -11  14  -1   22.01    4.10 
  11  14   1   31.74    4.40 
  11  14   1   27.08    4.70 
  12 -15  -1    7.28    4.72 
 -11 -15   1    7.00    3.42 
 -11 -15   1    4.18    3.05 
  11 -15  -1    4.98    4.11 
 -11 -15   1    4.80    3.70 
  11 -15  -1    5.69    3.93 
  11  15  -1    2.04    2.86 
  11  15  -1    6.43    3.40 
 -11  15   1    2.70    3.06 
 -11  15   1    7.95    4.27 
  10 -15  -1    0.07    3.24 
 -10 -15   1    1.11    2.85 
 -10 -15   1    1.47    2.60 
 -10 -15   1    0.64    3.15 
  10 -15  -1   -0.74    3.29 
 -10  15   1   -0.51    2.86 
  10  15  -1    3.48    2.64 
  10  15  -1   -2.25    2.60 
 -10  15   1   -0.31    2.57 
 -10  15   1    0.73    3.36 
   9 -15  -1    1.79    2.59 
  -9 -15   1   -2.22    2.66 
   9 -15  -1   -1.88    3.04 
  -9 -15   1    3.40    2.40 
  -9 -15   1    0.48    2.77 
   9 -15  -1   -1.08    2.64 
  -9  15   1    0.41    3.19 
  -9  15   1    1.20    2.39 
   9  15  -1   -2.09    2.17 
   9  15  -1   -3.61    2.44 
  -9  15   1   -0.83    2.11 
   9  15  -1    5.28    2.43 
   8 -15  -1   -0.49    2.05 
  -8 -15   1    1.07    2.60 
   8 -15  -1    1.13    2.75 
   8 -15  -1    4.52    2.56 
  -8 -15   1    2.56    2.51 
   8  15  -1    4.04    2.27 
   8  15  -1    1.82    1.91 
   8  15  -1    2.86    2.17 
  -8  15   1    2.20    2.06 
  -8  15   1   -1.20    2.72 
  -8  15   1    2.96    2.05 
   7 -15  -1    4.84    2.29 
  -7 -15   1    5.12    2.34 
  -7 -15   1    6.17    2.52 
   7 -15  -1    3.21    2.70 
   7 -15  -1    4.89    2.05 
   7  15  -1    2.74    1.69 
  -7  15   1    3.54    2.47 
  -7  15   1    1.31    1.81 
   7  15  -1    4.17    1.96 
   7  15  -1    1.69    1.93 
  -7  15   1    4.99    2.01 
   6 -15  -1   12.02    2.38 
  -6 -15   1   11.44    2.39 
   6 -15  -1   13.82    2.21 
  -6 -15   1   11.23    2.45 
   6 -15  -1   12.38    2.68 
  -6  15   1   11.91    2.05 
   6  15  -1   13.58    2.14 
  -6  15   1   12.43    1.45 
  -6  15   1   14.34    2.06 
  -6  15   1   11.94    2.38 
   6  15  -1   16.09    2.22 
   6  15  -1   14.33    2.10 
  -5 -15   1    2.34    1.52 
   5 -15  -1   -1.00    1.91 
  -5 -15   1    0.09    1.71 
   5 -15  -1    1.28    1.71 
  -5 -15   1   -0.93    1.84 
   5 -15  -1    2.30    1.72 
  -5  15   1    0.28    1.64 
   5  15  -1    0.79    1.49 
   5  15  -1   -1.03    1.36 
   5  15  -1    1.91    1.77 
  -5  15   1    1.77    0.85 
  -5  15   1    1.21    1.38 
   5  15  -1    1.34    1.28 
  -5  15   1    1.70    1.42 
  -4 -15   1   11.27    2.09 
   4 -15  -1    7.01    1.77 
  -4 -15   1   11.91    2.01 
   4 -15  -1   10.54    1.96 
   4 -15  -1   11.99    1.24 
  -4 -15   1   11.87    1.87 
   4 -15  -1   10.80    2.15 
   4  15  -1   10.33    1.64 
  -4  15   1   11.57    1.03 
   4  15  -1    9.63    1.51 
  -4  15   1   11.39    1.64 
  -4  15   1   11.36    1.71 
   4  15  -1   10.09    1.74 
   4  15  -1   12.44    2.07 
  -4  15   1   11.76    1.84 
  -3 -15   1   29.05    2.43 
   3 -15  -1   22.13    2.40 
  -3 -15   1   24.34    2.34 
   3 -15  -1   23.08    2.23 
   3 -15  -1   19.69    1.48 
  -3 -15   1   21.96    2.45 
   3 -15  -1   20.69    2.35 
  -3  15   1   22.54    1.44 
  -3  15   1   22.35    1.95 
   3  15  -1   24.68    2.32 
   3  15  -1   22.31    2.12 
  -3  15   1   24.24    2.26 
   3  15  -1   21.67    1.91 
  -3  15   1   20.60    2.00 
   3  15  -1   23.03    2.10 
  -2 -15   1    0.47    1.32 
  -2 -15   1    0.52    1.62 
   2 -15  -1   -0.83    1.47 
  -2 -15   1    2.92    1.75 
   2 -15  -1    0.47    0.76 
   2 -15  -1   -0.54    1.81 
   2 -15  -1   -0.05    1.15 
   2  15  -1    0.05    1.27 
   2  15  -1    1.33    1.24 
   2  15  -1   -0.04    1.12 
  -2  15   1    1.53    1.28 
   2  15  -1   -0.43    1.22 
  -2  15   1    0.83    1.22 
  -2  15   1    0.49    1.19 
  -2  15   1   -1.27    0.69 
   1 -15  -1    5.53    1.47 
  -1 -15   1    2.30    1.65 
  -1 -15   1    5.41    1.24 
  -1 -15   1    2.00    1.79 
   1 -15  -1    4.63    1.95 
  -1 -15   1    1.56    1.20 
   1 -15  -1    6.19    1.28 
   1 -15  -1    3.79    1.60 
  -1  15   1    4.86    1.27 
  -1  15   1    6.16    1.06 
   1  15  -1    7.94    1.42 
   1  15  -1    4.32    1.30 
  -1  15   1    6.36    1.52 
   1  15  -1    5.72    1.22 
   1  15  -1    3.66    1.45 
  -1  15   1    3.95    1.45 
   0 -15   1   14.53    1.37 
   0 -15  -1   15.82    2.15 
   0 -15   1   18.05    1.82 
   0 -15  -1   14.92    1.80 
   0 -15   1   15.04    2.03 
   0 -15  -1   15.84    1.71 
   0 -15   1   17.21    1.89 
   0 -15   1   13.69    1.28 
   0  15   1   15.87    1.79 
   0  15  -1   15.95    1.85 
   0  15   1   14.24    1.57 
   0  15  -1   11.56    1.55 
   0  15  -1   17.42    1.88 
   0  15   1   15.49    1.50 
   0  15   1   15.00    1.75 
  -1 -15  -1    5.36    1.73 
   1 -15   1    0.12    1.52 
  -1 -15  -1    4.02    1.22 
   1 -15   1    3.11    1.44 
  -1 -15  -1    2.19    1.46 
  -1 -15  -1    3.02    0.87 
   1 -15   1    2.06    1.65 
   1  15   1    2.99    1.34 
   1  15   1    0.67    1.38 
   1  15   1    3.16    0.91 
  -1  15  -1    4.07    1.25 
  -1  15  -1    0.75    1.38 
   1  15   1    2.09    1.34 
  -1  15  -1    4.23    1.46 
   1  15   1    3.40    0.98 
  -2 -15  -1   12.71    1.83 
  -2 -15  -1   12.16    1.12 
  -2 -15  -1   15.27    1.95 
   2 -15   1    8.77    1.87 
   2 -15   1   11.78    2.03 
   2 -15   1   12.79    1.62 
   2 -15   1   10.57    1.96 
  -2  15  -1   15.75    1.47 
   2  15   1   17.57    1.88 
  -2  15  -1   11.91    1.93 
   2  15   1   13.45    1.99 
   2  15   1   10.69    1.08 
   2  15   1   11.61    1.60 
  -2  15  -1   11.56    1.68 
  -3 -15  -1    8.30    1.75 
  -3 -15  -1    4.84    1.63 
   3 -15   1    4.41    1.95 
  -3 -15  -1    3.27    1.60 
  -3 -15  -1    4.57    0.84 
   3 -15   1    6.60    1.89 
   3 -15   1    6.93    1.81 
   3 -15   1    5.91    1.35 
  -3  15  -1    5.88    1.43 
   3  15   1    7.20    1.51 
   3  15   1    6.82    1.60 
   3  15   1    5.56    0.92 
  -3  15  -1    2.28    1.65 
   3  15   1    9.46    1.93 
  -3  15  -1    5.52    1.30 
  -4 -15  -1   21.22    2.32 
   4 -15   1   17.35    2.45 
  -4 -15  -1   17.81    2.38 
   4 -15   1   17.95    2.58 
  -4 -15  -1   15.20    1.94 
   4 -15   1   11.45    2.12 
   4  15   1   16.20    2.46 
   4  15   1   11.47    1.87 
   4  15   1   15.31    1.83 
  -4  15  -1   12.34    1.87 
  -4  15  -1   11.87    1.61 
  -4  15  -1   10.36    2.20 
   4  15   1   13.00    1.39 
   5 -15   1   23.17    3.14 
   5 -15   1   16.35    2.35 
   5 -15   1   18.14    2.71 
  -5 -15  -1   18.59    2.18 
  -5 -15  -1   19.85    2.53 
  -5 -15  -1   20.20    2.70 
  -5  15  -1   24.39    2.40 
  -5  15  -1   16.97    2.74 
   5  15   1   17.34    2.31 
  -5  15  -1   21.27    2.03 
   5  15   1   14.17    1.79 
   5  15   1   17.71    2.70 
   5  15   1   17.25    2.08 
  -6 -15  -1    3.13    2.16 
  -6 -15  -1   -1.75    1.71 
   6 -15   1    1.56    2.58 
   6 -15   1    0.12    1.96 
  -6 -15  -1    3.21    2.09 
   6 -15   1    0.74    2.16 
  -6  15  -1   -0.24    1.65 
   6  15   1    0.33    1.80 
   6  15   1   -2.02    1.61 
  -6  15  -1    0.31    2.19 
  -6  15  -1    1.02    1.55 
   6  15   1    0.67    2.24 
   6  15   1   -1.77    1.43 
   7 -15   1    5.36    2.33 
   7 -15   1    9.26    3.22 
  -7 -15  -1    6.53    2.18 
  -7 -15  -1    4.91    2.51 
   7 -15   1    4.83    2.83 
  -7 -15  -1    4.73    2.59 
   7  15   1    5.15    2.09 
  -7  15  -1    5.65    1.95 
   7  15   1    3.32    2.17 
  -7  15  -1    7.00    2.80 
  -7  15  -1    8.85    2.26 
   7  15   1    5.16    2.73 
   8 -15   1    6.58    3.42 
   8 -15   1    3.77    2.57 
  -8 -15  -1    4.45    2.93 
  -8 -15  -1    4.62    2.68 
   8 -15   1    1.60    3.24 
   8  15   1    2.12    2.38 
   8  15   1    3.86    3.02 
  -8  15  -1    4.01    2.35 
  -8  15  -1    2.17    3.15 
   8  15   1    3.37    2.40 
  -8  15  -1    4.30    2.41 
  -9 -15  -1    1.71    3.26 
   9 -15   1    8.49    3.56 
   9 -15   1    5.71    3.86 
  -9 -15  -1   -0.88    2.96 
   9 -15   1    3.00    2.83 
   9  15   1    4.95    2.57 
  -9  15  -1    4.99    2.70 
  -9  15  -1    0.88    3.66 
  -9  15  -1    3.97    2.97 
   9  15   1   -3.06    3.05 
   9  15   1    2.97    2.83 
 -10 -15  -1    1.00    3.38 
  10 -15   1    5.18    3.96 
  10 -15   1    1.71    3.59 
 -10 -15  -1   -0.13    2.64 
 -10 -15  -1   -0.39    3.35 
  10  15   1    3.61    3.41 
 -10  15  -1   -1.67    2.81 
 -10  15  -1   -2.09    4.20 
 -10  15  -1    6.24    2.59 
  10  15   1    0.91    2.73 
 -11 -15  -1    3.33    3.57 
  11 -15   1    0.28    4.25 
  11 -15   1    0.29    4.94 
 -11  15  -1    2.53    3.31 
  11  15   1    7.83    3.24 
 -12  16   1   34.08    4.81 
 -11 -16   1   20.42    3.64 
  11 -16  -1   16.85    4.47 
 -11 -16   1   21.55    4.41 
 -11 -16   1   20.44    4.34 
  11 -16  -1   24.59    4.88 
  11  16  -1   21.23    4.14 
  11  16  -1   17.79    4.06 
 -11  16   1   20.41    3.50 
 -11  16   1   17.79    3.71 
 -11  16   1   17.52    5.30 
  10 -16  -1    0.93    3.27 
  10 -16  -1   -1.46    3.45 
 -10 -16   1    0.55    3.16 
 -10 -16   1    0.97    2.70 
 -10 -16   1    1.83    3.06 
 -10  16   1   -2.16    2.65 
  10  16  -1    0.75    2.77 
 -10  16   1    0.33    2.51 
 -10  16   1   -5.91    3.25 
  10  16  -1    3.23    2.90 
  -9 -16   1   40.35    4.51 
   9 -16  -1   22.27    4.08 
  -9 -16   1   27.84    3.53 
   9 -16  -1   31.32    3.56 
   9 -16  -1   28.72    4.32 
  -9 -16   1   31.49    4.12 
   9  16  -1   33.99    3.69 
  -9  16   1   24.40    3.43 
   9  16  -1   32.93    3.89 
  -9  16   1   32.36    3.47 
  -9  16   1   30.83    4.56 
  -8 -16   1  139.59    8.00 
   8 -16  -1  138.11    7.04 
  -8 -16   1  145.20    7.55 
   8 -16  -1  116.76    7.79 
   8 -16  -1  147.51    8.09 
  -8  16   1  132.74    7.20 
  -8  16   1  137.28    8.15 
  -8  16   1  139.33    7.01 
   8  16  -1  139.12    6.99 
   8  16  -1  116.46    7.18 
   8  16  -1  134.49    7.26 
   7 -16  -1   22.14    3.27 
   7 -16  -1   25.40    3.55 
  -7 -16   1   29.17    3.68 
   7 -16  -1   27.68    2.91 
  -7 -16   1   28.79    3.50 
  -7  16   1   24.98    3.42 
  -7  16   1   31.22    2.86 
   7  16  -1   25.84    2.89 
   7  16  -1   31.83    3.11 
  -7  16   1   27.25    2.95 
   7  16  -1   36.77    3.29 
  -6 -16   1    9.06    2.40 
   6 -16  -1   14.37    2.88 
   6 -16  -1   13.81    2.30 
  -6 -16   1   15.97    2.67 
   6 -16  -1    9.33    2.35 
  -6  16   1    8.92    1.29 
  -6  16   1   11.35    2.43 
  -6  16   1   10.33    2.05 
   6  16  -1   13.47    2.24 
   6  16  -1   14.18    2.13 
  -6  16   1   11.55    2.02 
   6  16  -1    7.85    1.93 
   5 -16  -1   61.12    3.94 
   5 -16  -1   64.35    4.51 
  -5 -16   1   61.33    3.72 
   5 -16  -1   55.05    3.99 
  -5 -16   1   63.36    4.25 
  -5 -16   1   69.05    4.27 
   5  16  -1   54.97    3.47 
   5  16  -1   65.93    3.87 
  -5  16   1   59.88    4.01 
  -5  16   1   59.22    2.90 
   5  16  -1   68.40    3.83 
  -5  16   1   62.89    3.70 
  -5  16   1   58.44    3.82 
   5  16  -1   62.41    4.19 
  -4 -16   1  111.83    5.55 
  -4 -16   1  113.81    5.92 
  -4 -16   1  119.41    5.95 
   4 -16  -1  102.31    4.93 
   4 -16  -1  119.33    5.84 
   4 -16  -1  110.68    6.07 
   4 -16  -1  115.08    5.75 
   4  16  -1  120.49    5.93 
  -4  16   1  123.99    5.93 
   4  16  -1  124.97    5.67 
   4  16  -1  116.20    5.40 
  -4  16   1  108.92    5.61 
   4  16  -1  115.69    5.62 
  -4  16   1  112.92    4.83 
  -4  16   1  122.82    5.49 
   3 -16  -1   34.07    2.73 
  -3 -16   1   31.55    2.80 
  -3 -16   1   29.05    2.65 
   3 -16  -1   33.39    2.80 
  -3 -16   1   34.98    2.72 
   3 -16  -1   27.72    1.75 
   3 -16  -1   30.89    2.86 
   3  16  -1   33.15    2.34 
  -3  16   1   29.99    2.66 
  -3  16   1   34.64    2.60 
   3  16  -1   32.75    2.62 
   3  16  -1   29.46    2.63 
  -3  16   1   32.00    1.73 
   3  16  -1   32.46    2.79 
  -3  16   1   33.20    2.66 
   2 -16  -1   47.87    3.36 
   2 -16  -1   52.13    3.09 
  -2 -16   1   41.83    3.01 
  -2 -16   1   46.81    3.44 
  -2 -16   1   50.00    3.40 
   2 -16  -1   45.05    2.30 
   2 -16  -1   43.15    3.56 
  -2  16   1   43.04    2.90 
  -2  16   1   52.16    3.14 
   2  16  -1   49.72    3.01 
  -2  16   1   50.32    3.01 
   2  16  -1   44.35    3.07 
  -2  16   1   45.67    2.35 
   2  16  -1   46.63    2.82 
   2  16  -1   47.46    3.01 
  -1 -16   1  347.32   14.41 
   1 -16  -1  356.94   14.23 
   1 -16  -1  350.14   14.50 
  -1 -16   1  333.96   14.01 
   1 -16  -1  343.76   14.15 
  -1 -16   1  351.18   14.39 
   1 -16  -1  346.22   14.30 
  -1 -16   1  337.61   14.17 
  -1  16   1  345.32   14.18 
   1  16  -1  358.91   14.22 
  -1  16   1  355.29   14.00 
   1  16  -1  343.05   14.37 
  -1  16   1  348.49   14.29 
  -1  16   1  351.52   14.36 
   1  16  -1  350.11   14.29 
   1  16  -1  330.38   14.11 
   0 -16   1  161.17    7.80 
   0 -16  -1  180.30    7.87 
   0 -16   1  174.78    7.55 
   0 -16   1  180.85    7.87 
   0 -16  -1  188.68    7.82 
   0 -16   1  172.54    8.05 
   0 -16  -1  170.34    8.12 
   0 -16   1  180.75    7.94 
   0  16   1  184.37    7.77 
   0  16   1  185.83    7.98 
   0  16   1  187.45    7.71 
   0  16   1  185.94    7.95 
   0  16  -1  184.35    8.03 
   0  16  -1  188.82    8.03 
   0  16  -1  190.37    7.77 
  -1 -16  -1    2.33    1.55 
  -1 -16  -1    0.54    1.77 
  -1 -16  -1   -0.40    0.87 
  -1 -16  -1    0.69    1.19 
   1 -16   1   -1.14    1.59 
   1 -16   1   -2.34    1.45 
   1 -16   1    4.11    1.50 
  -1  16  -1    2.86    1.48 
   1  16   1    0.42    1.34 
  -1  16  -1   -0.68    1.31 
   1  16   1   -0.18    1.36 
   1  16   1   -0.54    0.92 
   1  16   1   -0.16    1.31 
  -1  16  -1   -0.22    1.27 
   2 -16   1   15.01    2.14 
   2 -16   1   15.54    2.21 
  -2 -16  -1   16.08    1.44 
  -2 -16  -1   13.23    1.99 
  -2 -16  -1   14.95    2.05 
   2 -16   1   17.29    1.81 
   2  16   1   15.01    1.81 
  -2  16  -1   13.58    2.04 
  -2  16  -1   17.34    1.64 
   2  16   1   18.42    1.98 
   2  16   1   13.82    1.24 
  -2  16  -1   12.25    1.80 
   2  16   1   15.84    2.09 
   3 -16   1  159.13    7.44 
   3 -16   1  163.30    7.02 
   3 -16   1  151.49    7.72 
  -3 -16  -1  163.15    7.42 
   3 -16   1  157.25    7.68 
  -3 -16  -1  164.74    7.61 
  -3 -16  -1  163.55    7.36 
  -3  16  -1  160.74    7.61 
   3  16   1  161.54    7.24 
   3  16   1  165.87    7.37 
  -3  16  -1  171.79    7.03 
   3  16   1  145.19    6.65 
   3  16   1  176.75    7.73 
  -4 -16  -1   50.28    3.49 
   4 -16   1   42.21    3.69 
  -4 -16  -1   45.02    3.26 
  -4 -16  -1   48.43    3.68 
   4 -16   1   46.85    3.53 
   4 -16   1   43.50    3.84 
  -4  16  -1   41.48    3.70 
   4  16   1   47.43    3.32 
  -4  16  -1   48.28    3.31 
   4  16   1   41.22    2.50 
  -4  16  -1   51.85    2.94 
   4  16   1   43.97    3.17 
   4  16   1   46.33    3.83 
   5 -16   1    5.29    2.16 
  -5 -16  -1    3.62    1.74 
   5 -16   1    3.20    2.02 
   5 -16   1    1.65    2.27 
  -5 -16  -1   -2.78    1.77 
  -5 -16  -1   -2.47    1.83 
   5  16   1    0.23    1.24 
   5  16   1    2.16    1.58 
  -5  16  -1    1.46    1.41 
   5  16   1    2.10    1.71 
  -5  16  -1    4.12    1.98 
   5  16   1    1.17    1.99 
  -5  16  -1    1.94    1.60 
   6 -16   1   44.81    4.34 
  -6 -16  -1   46.58    3.66 
  -6 -16  -1   42.96    3.92 
   6 -16   1   40.61    3.99 
   6 -16   1   44.38    3.92 
  -6 -16  -1   46.18    3.96 
   6  16   1   43.05    3.62 
   6  16   1   45.88    3.61 
   6  16   1   40.64    3.31 
  -6  16  -1   50.17    3.79 
  -6  16  -1   48.72    3.26 
  -6  16  -1   47.95    4.21 
   6  16   1   36.25    3.97 
  -7 -16  -1   73.64    5.66 
   7 -16   1   80.77    6.57 
   7 -16   1   87.41    6.53 
  -7 -16  -1   81.16    5.92 
  -7 -16  -1   87.70    5.10 
   7 -16   1   83.37    5.42 
   7  16   1   82.56    5.29 
  -7  16  -1   86.89    6.47 
   7  16   1   83.40    6.04 
  -7  16  -1   93.16    5.01 
   7  16   1   89.92    5.43 
  -7  16  -1   82.54    5.27 
  -8 -16  -1   57.60    5.13 
  -8 -16  -1   62.44    5.39 
   8 -16   1   50.69    5.38 
   8 -16   1   44.75    5.25 
   8 -16   1   56.79    4.73 
   8  16   1   65.24    5.82 
   8  16   1   46.00    4.40 
  -8  16  -1   52.18    4.10 
  -8  16  -1   49.09    4.37 
  -8  16  -1   62.76    6.09 
   8  16   1   50.45    4.44 
  -9 -16  -1    7.16    3.53 
   9 -16   1    5.23    3.59 
   9 -16   1    4.12    3.60 
   9 -16   1    0.94    3.05 
  -9 -16  -1    7.46    3.36 
  -9  16  -1    4.67    2.78 
  -9  16  -1    0.89    3.61 
   9  16   1    7.58    3.13 
   9  16   1    2.75    2.47 
   9  16   1    5.03    3.42 
  -9  16  -1    0.69    2.84 
  10 -16   1   42.64    5.75 
 -10 -16  -1   46.22    5.64 
  10 -16   1   28.62    5.95 
 -10 -16  -1   41.89    4.88 
 -10 -16  -1   38.40    4.63 
  10  16   1   37.94    4.94 
 -10  16  -1   42.30    4.43 
 -10  16  -1   49.67    4.81 
  10  16   1   51.53    5.41 
 -10  16  -1   35.70    5.81 
  11 -16   1   34.26    5.71 
 -11 -16  -1   29.99    5.21 
  11  16   1   28.59    5.10 
 -11  16  -1   26.44    4.44 
 -12  17   1    1.10    4.23 
 -11 -17   1   31.08    4.80 
 -11 -17   1   26.80    4.28 
  11 -17  -1   26.20    5.32 
  11 -17  -1   26.97    5.22 
 -11 -17   1   23.42    4.58 
  11  17  -1   27.02    4.22 
 -11  17   1   37.51    4.46 
 -11  17   1   30.12    5.65 
  11  17  -1   38.15    4.92 
  10 -17  -1   36.45    5.33 
 -10 -17   1   53.57    5.27 
 -10 -17   1   59.48    5.98 
  10 -17  -1   61.92    6.37 
 -10 -17   1   47.73    4.86 
 -10  17   1   56.72    6.46 
 -10  17   1   50.94    4.81 
  10  17  -1   60.97    5.16 
 -10  17   1   58.67    6.36 
  10  17  -1   57.47    4.99 
   9 -17  -1   51.91    4.30 
  -9 -17   1   44.50    4.79 
   9 -17  -1   34.83    4.53 
   9 -17  -1   36.41    4.85 
  -9 -17   1   42.29    4.54 
   9  17  -1   38.74    4.22 
  -9  17   1   41.26    5.13 
  -9  17   1   43.80    4.09 
   9  17  -1   43.72    4.29 
  -9  17   1   32.40    3.66 
   8 -17  -1    5.90    3.24 
  -8 -17   1    6.73    2.81 
   8 -17  -1    1.95    2.63 
  -8 -17   1    6.10    2.87 
   8 -17  -1    5.45    2.39 
  -8  17   1    6.92    2.43 
  -8  17   1    7.58    2.93 
   8  17  -1    6.38    2.37 
   8  17  -1    5.66    2.30 
   8  17  -1    3.55    2.39 
  -8  17   1    4.11    2.26 
   7 -17  -1   80.97    5.98 
  -7 -17   1   90.07    5.61 
   7 -17  -1   77.84    5.70 
   7 -17  -1   86.22    5.05 
  -7 -17   1   80.25    5.62 
   7  17  -1   79.32    4.97 
   7  17  -1   84.00    5.10 
  -7  17   1   78.85    4.83 
  -7  17   1   78.91    5.05 
  -7  17   1   87.37    5.94 
   7  17  -1   83.46    5.14 
   6 -17  -1  130.28    7.17 
  -6 -17   1  131.60    7.08 
   6 -17  -1  137.54    6.67 
   6 -17  -1  136.58    7.36 
  -6 -17   1  124.60    6.96 
   6  17  -1  129.54    6.68 
  -6  17   1  134.16    7.14 
  -6  17   1  118.61    6.61 
   6  17  -1  137.02    6.65 
  -6  17   1  128.01    6.43 
   6  17  -1  143.74    6.52 
   5 -17  -1   63.23    4.25 
   5 -17  -1   59.91    4.55 
   5 -17  -1   60.28    3.97 
  -5 -17   1   55.03    4.12 
  -5 -17   1   64.36    3.72 
  -5 -17   1   61.02    4.25 
   5  17  -1   53.51    3.44 
   5  17  -1   58.99    4.17 
   5  17  -1   60.11    3.85 
  -5  17   1   58.72    4.00 
  -5  17   1   59.12    2.81 
  -5  17   1   58.55    3.67 
  -5  17   1   58.56    3.79 
   5  17  -1   57.48    3.76 
   4 -17  -1   28.29    2.71 
   4 -17  -1   23.24    2.57 
  -4 -17   1   24.09    2.70 
   4 -17  -1   20.80    2.73 
  -4 -17   1   24.19    2.62 
  -4 -17   1   23.61    2.42 
   4 -17  -1   19.76    1.60 
  -4  17   1   19.60    2.21 
   4  17  -1   29.35    2.79 
   4  17  -1   25.63    2.20 
  -4  17   1   25.46    2.28 
   4  17  -1   22.11    2.28 
  -4  17   1   20.15    2.40 
   4  17  -1   32.03    2.54 
   3 -17  -1  328.79   14.26 
  -3 -17   1  338.00   14.02 
  -3 -17   1  333.71   14.16 
   3 -17  -1  358.26   14.28 
   3 -17  -1  328.42   14.12 
   3 -17  -1  304.57   13.39 
   3  17  -1  331.94   14.04 
  -3  17   1  345.74   13.91 
  -3  17   1  333.46   14.06 
   3  17  -1  337.88   14.17 
  -3  17   1  329.45   13.38 
   3  17  -1  353.22   14.06 
  -3  17   1  355.72   14.25 
   3  17  -1  341.36   13.88 
   2 -17  -1  202.86    9.14 
   2 -17  -1  210.08    9.00 
  -2 -17   1  207.02    9.09 
  -2 -17   1  204.43    9.16 
   2 -17  -1  190.95    8.37 
  -2 -17   1  207.20    9.04 
   2 -17  -1  206.48    9.25 
  -2  17   1  206.92    9.02 
   2  17  -1  215.47    8.91 
   2  17  -1  213.69    9.06 
  -2  17   1  210.68    9.00 
  -2  17   1  209.65    8.91 
   2  17  -1  210.01    8.96 
   2  17  -1  206.75    8.84 
  -2  17   1  203.25    8.44 
  -1 -17   1    6.04    1.92 
   1 -17  -1    6.91    1.44 
  -1 -17   1    6.79    1.43 
   1 -17  -1    6.26    1.71 
  -1 -17   1    9.20    2.03 
  -1 -17   1    3.90    1.33 
   1 -17  -1    7.77    1.74 
   1 -17  -1    7.21    2.10 
  -1  17   1    7.16    1.64 
   1  17  -1    5.16    1.47 
   1  17  -1    7.57    1.58 
  -1  17   1    4.98    1.35 
  -1  17   1    3.34    1.10 
   1  17  -1    4.99    1.29 
  -1  17   1    6.44    1.59 
   1  17  -1    6.70    1.67 
   0 -17   1   73.78    4.22 
   0 -17   1   76.19    4.39 
   0 -17  -1   80.13    4.19 
   0 -17   1   79.78    4.13 
   0 -17   1   71.62    3.69 
   0 -17  -1   79.54    4.54 
   0 -17  -1   79.38    4.08 
   0  17   1   85.96    4.28 
   0  17   1   73.22    3.90 
   0  17   1   85.68    3.94 
   0  17  -1   76.70    4.00 
   0  17  -1   73.10    4.25 
   0  17   1   79.71    4.22 
   0  17  -1   83.76    4.31 
  -1 -17  -1  187.77    8.07 
   1 -17   1  190.88    8.31 
  -1 -17  -1  184.84    8.37 
  -1 -17  -1  193.89    8.59 
   1 -17   1  190.99    8.56 
   1 -17   1  191.10    8.55 
   1  17   1  196.13    8.44 
   1  17   1  184.86    7.98 
  -1  17  -1  194.88    8.20 
   1  17   1  199.92    8.52 
  -1  17  -1  197.36    8.58 
   1  17   1  185.69    8.37 
  -1  17  -1  196.51    8.55 
  -2 -17  -1  191.77    7.85 
  -2 -17  -1  182.05    8.36 
   2 -17   1  190.67    8.48 
   2 -17   1  184.82    8.58 
   2 -17   1  197.28    8.13 
  -2 -17  -1  187.38    8.32 
   2  17   1  184.45    8.35 
   2  17   1  190.87    8.26 
   2  17   1  165.46    7.71 
  -2  17  -1  195.32    8.42 
  -2  17  -1  189.33    8.64 
  -2  17  -1  186.49    8.01 
   2  17   1  202.46    8.56 
  -3 -17  -1   -0.49    1.54 
   3 -17   1    1.70    1.74 
   3 -17   1    1.60    1.88 
  -3 -17  -1    1.48    0.81 
  -3 -17  -1    1.47    1.70 
   3 -17   1    4.09    1.41 
   3 -17   1    3.85    2.04 
  -3 -17  -1    0.03    1.64 
   3  17   1    4.44    1.83 
  -3  17  -1    0.24    1.32 
   3  17   1    1.35    0.90 
   3  17   1    3.20    1.43 
  -3  17  -1    4.89    1.79 
  -3  17  -1    1.97    1.29 
   3  17   1    3.41    1.54 
   4 -17   1   66.18    4.34 
   4 -17   1   64.93    4.50 
  -4 -17  -1   72.66    4.50 
  -4 -17  -1   74.26    4.34 
   4 -17   1   73.39    4.96 
  -4 -17  -1   67.73    4.15 
  -4  17  -1   81.29    4.29 
  -4  17  -1   73.71    3.74 
   4  17   1   74.28    4.66 
   4  17   1   61.92    3.39 
  -4  17  -1   64.92    4.51 
   4  17   1   68.68    4.04 
   4  17   1   68.34    4.20 
   5 -17   1  121.84    6.40 
   5 -17   1  120.18    6.86 
  -5 -17  -1  131.59    6.23 
  -5 -17  -1  124.93    6.44 
   5 -17   1  115.61    6.90 
  -5 -17  -1  123.64    6.74 
  -5  17  -1  130.10    5.95 
  -5  17  -1  111.42    6.72 
   5  17   1  127.70    6.32 
   5  17   1  128.56    6.88 
   5  17   1  131.10    6.19 
  -5  17  -1  122.58    6.30 
   5  17   1  115.13    5.73 
   6 -17   1   52.62    4.92 
  -6 -17  -1   57.32    4.81 
   6 -17   1   59.72    5.31 
   6 -17   1   66.32    4.63 
  -6 -17  -1   69.52    4.39 
  -6 -17  -1   65.99    4.74 
  -6  17  -1   60.59    4.35 
   6  17   1   57.56    4.20 
   6  17   1   54.88    4.37 
   6  17   1   68.89    5.09 
  -6  17  -1   60.32    3.94 
  -6  17  -1   65.58    4.93 
  -7 -17  -1    3.11    2.36 
  -7 -17  -1    5.62    2.73 
   7 -17   1    3.66    2.84 
   7 -17   1    7.53    3.19 
   7 -17   1    6.45    2.61 
  -7 -17  -1    1.00    2.66 
  -7  17  -1    0.97    2.82 
   7  17   1    1.56    2.71 
   7  17   1    6.25    2.15 
  -7  17  -1    4.24    2.29 
  -7  17  -1    4.93    1.88 
   7  17   1    1.97    2.25 
  -8 -17  -1   37.15    4.41 
   8 -17   1   47.70    5.36 
  -8 -17  -1   42.19    4.76 
   8 -17   1   36.21    4.29 
   8 -17   1   29.70    4.89 
  -8  17  -1   34.10    3.86 
   8  17   1   44.31    3.91 
   8  17   1   47.38    5.19 
   8  17   1   42.88    4.08 
  -8  17  -1   46.71    3.68 
  -8  17  -1   50.47    5.59 
   9 -17   1   69.79    6.95 
   9 -17   1   68.08    6.07 
  -9 -17  -1   79.24    6.33 
   9 -17   1   97.29    7.52 
  -9 -17  -1   82.63    6.81 
   9  17   1   77.56    6.17 
  -9  17  -1   65.41    5.75 
   9  17   1   67.42    5.57 
  -9  17  -1   93.86    7.70 
   9  17   1   83.46    7.14 
  -9  17  -1   81.23    5.26 
  10 -17   1   20.80    4.99 
  10 -17   1   15.59    4.95 
 -10 -17  -1   18.23    4.01 
 -10 -17  -1   12.75    3.98 
  10  17   1   23.57    3.85 
 -10  17  -1   19.43    5.29 
 -10  17  -1   22.40    3.79 
  10  17   1   15.77    3.88 
  11 -17   1    5.80    4.98 
 -11 -17  -1    6.43    4.05 
  11  17   1    9.46    3.53 
 -11 -18   1    1.45    3.82 
  11 -18  -1    7.86    4.69 
  11 -18  -1    4.44    4.24 
 -11 -18   1   11.82    3.94 
 -11 -18   1    6.52    3.63 
 -11  18   1    4.77    2.99 
  11  18  -1   10.12    3.76 
 -11  18   1    3.81    3.31 
 -11  18   1    6.04    5.70 
  11  18  -1    9.33    4.24 
 -10 -18   1    3.89    3.23 
 -10 -18   1    0.93    3.28 
 -10 -18   1    0.17    2.62 
  10 -18  -1   -1.90    3.13 
  10 -18  -1    3.53    4.01 
 -10  18   1    3.76    3.99 
 -10  18   1    0.71    3.79 
  10  18  -1    1.51    2.69 
 -10  18   1    1.45    2.80 
  10  18  -1    0.39    2.86 
   9 -18  -1   18.77    3.13 
  -9 -18   1   10.04    3.26 
   9 -18  -1    6.50    3.53 
   9 -18  -1    8.36    3.68 
  -9 -18   1   10.72    3.36 
   9  18  -1   11.34    3.10 
   9  18  -1   15.33    3.21 
  -9  18   1   10.43    2.65 
  -9  18   1   17.94    3.99 
  -9  18   1   10.97    2.93 
   8 -18  -1   30.01    3.63 
  -8 -18   1   28.91    4.00 
  -8 -18   1   31.35    3.79 
   8 -18  -1   23.60    3.85 
   8 -18  -1   26.08    4.12 
   8  18  -1   35.89    3.60 
  -8  18   1   36.36    4.66 
  -8  18   1   30.11    3.17 
  -8  18   1   25.31    3.26 
   8  18  -1   28.26    3.44 
   8  18  -1   26.81    3.42 
   7 -18  -1    6.74    2.33 
  -7 -18   1    4.07    2.65 
   7 -18  -1    2.92    2.51 
   7 -18  -1    8.95    3.08 
  -7 -18   1    9.96    2.87 
   7  18  -1    5.42    2.33 
   7  18  -1    4.79    1.90 
  -7  18   1    9.74    2.26 
   7  18  -1    7.27    2.16 
  -7  18   1    6.79    2.68 
  -7  18   1    6.62    2.17 
  -6 -18   1    3.89    1.92 
   6 -18  -1    3.27    2.59 
  -6 -18   1    0.95    2.27 
  -6 -18   1   -1.02    2.11 
   6 -18  -1    2.17    2.14 
   6 -18  -1    2.42    2.24 
  -6  18   1    3.21    1.83 
   6  18  -1    0.74    1.93 
  -6  18   1    1.66    2.31 
  -6  18   1    2.95    1.93 
   6  18  -1   -0.55    1.70 
   6  18  -1   -0.24    1.61 
   5 -18  -1   18.72    2.72 
   5 -18  -1   18.64    3.01 
  -5 -18   1   25.46    2.98 
  -5 -18   1   15.80    2.72 
  -5 -18   1   27.61    2.57 
   5 -18  -1   17.72    2.57 
   5  18  -1   19.23    2.29 
  -5  18   1   20.75    2.39 
  -5  18   1   21.04    2.26 
   5  18  -1   18.27    2.29 
   5  18  -1   22.50    2.58 
  -5  18   1   21.79    2.89 
   5  18  -1   24.99    3.00 
  -4 -18   1   26.22    2.78 
  -4 -18   1   25.32    2.85 
  -4 -18   1   31.07    2.68 
   4 -18  -1   22.33    2.94 
   4 -18  -1   25.40    2.77 
   4 -18  -1   26.81    2.81 
  -4  18   1   29.06    2.85 
   4  18  -1   26.26    2.30 
  -4  18   1   28.08    2.40 
   4  18  -1   26.35    2.55 
  -4  18   1   23.93    2.44 
   4  18  -1   29.22    2.92 
   4  18  -1   33.00    2.70 
  -3 -18   1    4.39    1.97 
   3 -18  -1    2.55    1.84 
  -3 -18   1    1.75    1.75 
  -3 -18   1    5.42    1.77 
   3 -18  -1    2.09    1.82 
   3 -18  -1    0.44    0.79 
   3 -18  -1    2.57    1.50 
  -3  18   1    3.20    1.47 
   3  18  -1   -0.68    1.47 
  -3  18   1    0.33    0.72 
   3  18  -1    2.44    1.31 
   3  18  -1    1.09    1.47 
   3  18  -1    2.46    1.54 
  -3  18   1    0.25    1.48 
  -3  18   1    1.29    1.53 
  -2 -18   1   25.53    2.55 
   2 -18  -1   21.83    2.21 
  -2 -18   1   24.29    2.63 
   2 -18  -1   17.25    1.63 
   2 -18  -1   26.82    2.13 
  -2 -18   1   22.89    2.28 
   2 -18  -1   27.31    2.71 
   2 -18  -1   22.21    2.47 
   2  18  -1   28.85    2.30 
   2  18  -1   21.74    2.24 
   2  18  -1   24.60    2.22 
   2  18  -1   26.58    2.32 
  -2  18   1   22.79    2.23 
  -2  18   1   25.01    2.22 
  -2  18   1   21.85    2.22 
  -2  18   1   19.11    1.62 
  -1 -18   1   19.26    1.91 
   1 -18  -1   18.85    2.22 
   1 -18  -1   21.58    2.22 
   1 -18  -1   20.29    2.53 
  -1 -18   1   23.42    2.48 
  -1 -18   1   23.77    1.92 
  -1 -18   1   18.51    2.48 
   1  18  -1   20.41    2.24 
  -1  18   1   19.95    2.28 
  -1  18   1   18.10    1.96 
   1  18  -1   24.39    2.14 
  -1  18   1   21.59    1.88 
  -1  18   1   21.62    2.18 
   1  18  -1   23.08    2.20 
   0 -18  -1   35.75    2.81 
   0 -18  -1   30.20    2.92 
   0 -18  -1   29.63    2.63 
   0 -18   1   29.35    2.16 
   0 -18   1   31.85    2.75 
   0 -18   1   31.78    2.85 
   0 -18   1   32.29    2.70 
   0  18   1   33.45    2.45 
   0  18  -1   39.00    2.87 
   0  18  -1   34.82    2.59 
   0  18  -1   33.25    2.70 
   0  18   1   33.53    2.83 
   0  18   1   32.76    2.76 
   0  18   1   34.81    2.38 
   1 -18   1    3.04    1.81 
  -1 -18  -1    6.75    2.04 
  -1 -18  -1    6.90    1.45 
   1 -18   1    6.18    1.97 
   1 -18   1    7.02    1.68 
  -1 -18  -1    9.87    1.83 
   1  18   1    6.69    1.63 
  -1  18  -1    8.10    1.81 
  -1  18  -1    6.99    1.53 
   1  18   1    6.78    1.78 
  -1  18  -1    8.05    1.76 
   1  18   1    5.91    1.60 
   1  18   1    5.38    1.18 
   2 -18   1   17.02    2.40 
  -2 -18  -1   19.73    2.38 
   2 -18   1   22.10    2.60 
   2 -18   1   19.73    2.01 
  -2 -18  -1   22.49    2.35 
  -2 -18  -1   16.20    2.14 
  -2  18  -1   20.92    1.93 
   2  18   1   18.16    2.29 
   2  18   1   21.63    2.04 
   2  18   1   16.60    1.56 
  -2  18  -1   20.44    2.44 
   2  18   1   21.91    2.33 
  -2  18  -1   17.13    2.10 
  -3 -18  -1   12.50    2.14 
   3 -18   1   14.50    2.41 
   3 -18   1   16.52    1.90 
  -3 -18  -1   12.58    2.13 
   3 -18   1   14.91    2.32 
  -3 -18  -1   16.95    2.23 
   3 -18   1   15.04    2.50 
   3  18   1   17.35    2.42 
  -3  18  -1   16.70    1.80 
   3  18   1   13.17    2.06 
   3  18   1   13.83    1.94 
   3  18   1   14.39    1.39 
  -3  18  -1   17.39    2.16 
  -3  18  -1   13.57    2.20 
  -4 -18  -1   24.49    2.54 
   4 -18   1   19.47    2.76 
   4 -18   1   25.54    3.03 
  -4 -18  -1   22.69    2.80 
  -4 -18  -1   29.62    2.89 
   4 -18   1   21.13    2.96 
   4  18   1   23.88    2.95 
   4  18   1   21.96    2.32 
  -4  18  -1   23.31    2.94 
   4  18   1   19.25    1.83 
  -4  18  -1   20.01    2.35 
  -4  18  -1   30.02    2.27 
   4  18   1   25.36    2.61 
  -5 -18  -1    1.65    1.90 
   5 -18   1    2.69    2.35 
  -5 -18  -1   -2.43    2.06 
  -5 -18  -1    3.37    2.13 
   5 -18   1    1.06    2.09 
   5 -18   1    0.24    2.33 
  -5  18  -1    0.85    1.54 
   5  18   1    1.27    1.29 
  -5  18  -1    0.31    1.74 
  -5  18  -1    0.68    2.16 
   5  18   1    4.09    1.88 
   5  18   1    0.56    2.08 
   5  18   1    0.00    1.64 
  -6 -18  -1   38.16    3.31 
   6 -18   1   26.87    3.77 
  -6 -18  -1   26.13    3.38 
  -6 -18  -1   34.22    3.71 
   6 -18   1   33.34    3.47 
   6 -18   1   28.84    3.98 
   6  18   1   33.04    3.71 
   6  18   1   33.87    3.15 
  -6  18  -1   33.04    2.82 
  -6  18  -1   34.81    3.25 
   6  18   1   30.70    3.38 
  -6  18  -1   29.94    3.85 
  -7 -18  -1   18.98    3.43 
  -7 -18  -1   11.83    3.13 
  -7 -18  -1   17.09    2.78 
   7 -18   1   13.60    3.40 
   7 -18   1   22.52    3.90 
   7 -18   1   23.95    3.30 
   7  18   1   14.40    2.86 
   7  18   1   15.48    3.36 
  -7  18  -1   17.97    2.45 
   7  18   1   13.69    2.59 
  -7  18  -1   14.40    3.59 
  -7  18  -1   15.46    2.78 
  -8 -18  -1    4.66    3.04 
   8 -18   1    0.74    2.57 
   8 -18   1    2.40    3.39 
   8 -18   1    2.92    3.58 
  -8 -18  -1    8.35    3.06 
  -8  18  -1    5.86    2.19 
   8  18   1    2.20    2.68 
   8  18   1    1.35    2.23 
   8  18   1    2.42    3.08 
  -8  18  -1   -2.67    2.16 
  -8  18  -1    4.61    3.70 
   9 -18   1    4.05    3.18 
  -9 -18  -1    4.19    3.27 
   9 -18   1    5.58    3.78 
   9 -18   1   -0.26    3.62 
  -9 -18  -1   -0.68    3.08 
  -9  18  -1    4.51    2.84 
  -9  18  -1    5.34    3.99 
   9  18   1    1.92    3.18 
  -9  18  -1    0.96    2.59 
   9  18   1    2.89    2.57 
   9  18   1    2.19    2.78 
  10 -18   1    9.25    4.41 
 -10 -18  -1    5.62    3.79 
 -10 -18  -1    7.78    4.56 
  10 -18   1   11.82    4.64 
 -10  18  -1    8.76    3.27 
  10  18   1    3.09    3.40 
 -10  18  -1   11.96    4.94 
  10  18   1    7.89    3.44 
 -11 -18  -1    8.46    4.96 
  11  18   1   17.85    4.03 
 -11 -19   1   13.53    3.96 
  11 -19  -1   14.39    4.75 
  11  19  -1    6.57    3.62 
 -10 -19   1    3.07    2.80 
  10 -19  -1    0.95    3.63 
 -10 -19   1    3.33    3.37 
  10 -19  -1    2.99    4.00 
 -10 -19   1    1.21    3.35 
 -10  19   1    5.49    2.78 
 -10  19   1    6.72    4.02 
 -10  19   1    3.57    2.98 
  10  19  -1    0.18    2.75 
  10  19  -1    8.58    3.07 
   9 -19  -1    6.59    3.81 
  -9 -19   1    4.96    3.37 
   9 -19  -1    6.76    3.07 
  -9 -19   1    5.91    3.29 
   9 -19  -1    4.97    3.26 
  -9  19   1    8.41    2.64 
  -9  19   1    4.71    2.68 
  -9  19   1    3.65    3.63 
   9  19  -1    7.17    2.58 
   9  19  -1    4.82    2.86 
   8 -19  -1    1.17    3.05 
  -8 -19   1    4.86    2.98 
   8 -19  -1    3.52    2.85 
  -8 -19   1    2.03    2.85 
   8 -19  -1    0.13    2.41 
   8  19  -1    3.46    2.29 
  -8  19   1    5.04    3.06 
  -8  19   1    1.34    2.29 
   8  19  -1    1.96    2.41 
  -8  19   1    2.15    2.28 
  -7 -19   1   15.45    3.28 
  -7 -19   1   23.05    3.57 
   7 -19  -1   14.49    3.08 
   7 -19  -1   19.21    3.48 
   7 -19  -1   18.53    2.86 
  -7  19   1   18.47    2.83 
  -7  19   1   18.02    3.29 
   7  19  -1   15.35    2.67 
  -7  19   1   18.91    2.84 
   7  19  -1   16.68    2.69 
   7  19  -1   16.58    2.72 
   6 -19  -1   58.38    4.39 
  -6 -19   1   54.29    4.60 
   6 -19  -1   53.29    4.60 
  -6 -19   1   51.38    4.49 
  -6 -19   1   61.28    3.99 
   6 -19  -1   54.67    4.71 
   6  19  -1   57.06    4.28 
  -6  19   1   56.48    4.14 
   6  19  -1   56.59    3.72 
   6  19  -1   57.47    4.08 
  -6  19   1   64.77    4.11 
  -6  19   1   53.76    4.73 
  -5 -19   1   29.45    3.12 
   5 -19  -1   17.20    2.80 
  -5 -19   1   21.49    3.01 
  -5 -19   1   28.37    2.72 
   5 -19  -1   21.78    2.77 
   5 -19  -1   24.82    3.19 
  -5  19   1   27.93    2.53 
  -5  19   1   20.36    2.47 
   5  19  -1   23.17    2.95 
   5  19  -1   24.36    2.71 
   5  19  -1   28.92    2.52 
   5  19  -1   22.67    2.60 
  -5  19   1   29.36    3.07 
   4 -19  -1   11.87    2.14 
  -4 -19   1   17.26    2.45 
   4 -19  -1   11.19    2.30 
   4 -19  -1   13.68    2.54 
  -4 -19   1   13.91    2.44 
  -4 -19   1   15.66    2.27 
  -4  19   1   13.01    1.97 
  -4  19   1   11.19    2.12 
   4  19  -1   12.07    2.05 
   4  19  -1   14.48    2.09 
  -4  19   1    9.44    1.91 
   4  19  -1   15.60    2.39 
   4  19  -1   13.27    1.79 
   3 -19  -1   58.18    3.96 
   3 -19  -1   47.93    2.46 
   3 -19  -1   55.99    3.61 
  -3 -19   1   55.61    3.82 
  -3 -19   1   53.32    3.67 
   3 -19  -1   50.79    3.85 
  -3 -19   1   53.30    3.75 
  -3  19   1   52.47    3.51 
  -3  19   1   55.16    3.42 
   3  19  -1   50.87    3.48 
   3  19  -1   51.37    3.50 
   3  19  -1   50.46    3.08 
  -3  19   1   55.19    3.52 
   3  19  -1   50.34    3.55 
   2 -19  -1   36.63    3.16 
   2 -19  -1   31.05    3.03 
  -2 -19   1   37.43    3.05 
  -2 -19   1   31.99    2.85 
   2 -19  -1   32.06    2.81 
   2 -19  -1   31.07    2.66 
  -2 -19   1   36.24    2.94 
   2  19  -1   34.75    2.69 
   2  19  -1   38.48    2.87 
  -2  19   1   33.40    2.90 
  -2  19   1   37.36    2.89 
   2  19  -1   29.45    2.66 
   2  19  -1   30.50    2.74 
  -2  19   1   32.81    2.71 
  -2  19   1   30.47    2.04 
   1 -19  -1    4.13    1.72 
  -1 -19   1    2.33    1.99 
   1 -19  -1    0.48    1.99 
  -1 -19   1    3.06    1.39 
  -1 -19   1    1.30    1.36 
  -1 -19   1    0.07    1.79 
   1 -19  -1    2.68    1.72 
   1  19  -1    4.03    1.54 
  -1  19   1    2.02    1.40 
  -1  19   1    2.46    1.56 
   1  19  -1    2.90    1.53 
  -1  19   1    2.11    1.62 
   1  19  -1    2.16    1.62 
  -1  19   1    1.04    1.10 
   0 -19   1   14.46    1.54 
   0 -19  -1   12.13    2.35 
   0 -19  -1   14.89    1.98 
   0 -19   1   14.35    2.32 
   0 -19   1   15.26    2.14 
   0 -19  -1   16.60    2.06 
   0 -19   1   13.98    2.03 
   0  19  -1   14.22    1.89 
   0  19   1   15.97    1.72 
   0  19   1   15.87    1.99 
   0  19  -1   14.87    2.02 
   0  19   1   15.58    1.76 
   0  19  -1   14.50    2.08 
   0  19   1   15.78    2.00 
  -1 -19  -1   15.79    1.77 
   1 -19   1   15.85    2.21 
  -1 -19  -1   14.13    2.07 
   1 -19   1   15.38    2.34 
   1 -19   1   15.05    2.00 
  -1 -19  -1   14.04    2.32 
   1  19   1   12.67    1.50 
   1  19   1   13.75    1.95 
   1  19   1   15.74    1.99 
  -1  19  -1   14.22    2.12 
  -1  19  -1   13.39    2.09 
   1  19   1   15.07    2.07 
  -1  19  -1   13.32    1.77 
  -2 -19  -1   17.32    2.27 
   2 -19   1   22.04    2.64 
   2 -19   1   19.64    2.55 
  -2 -19  -1   22.36    2.51 
  -2 -19  -1   18.03    2.23 
   2 -19   1   22.07    2.10 
   2  19   1   17.94    1.62 
  -2  19  -1   19.68    2.21 
   2  19   1   18.66    2.10 
   2  19   1   17.90    2.20 
   2  19   1   25.19    2.54 
  -2  19  -1   17.07    2.37 
  -2  19  -1   25.74    2.09 
   3 -19   1    4.14    1.56 
  -3 -19  -1    2.35    1.83 
  -3 -19  -1    3.90    1.91 
   3 -19   1    3.44    2.04 
   3 -19   1    1.21    1.93 
   3 -19   1    5.90    2.15 
  -3 -19  -1    4.62    1.83 
   3  19   1    1.30    1.62 
  -3  19  -1    4.57    1.50 
   3  19   1    2.05    1.54 
  -3  19  -1    0.22    1.81 
  -3  19  -1    0.83    1.53 
   3  19   1    0.84    1.02 
   3  19   1    4.56    1.95 
   4 -19   1   11.51    2.49 
  -4 -19  -1   14.04    2.26 
  -4 -19  -1   12.86    2.54 
   4 -19   1   15.20    2.47 
  -4 -19  -1    8.23    2.19 
   4 -19   1   17.21    3.00 
  -4  19  -1   11.66    2.49 
  -4  19  -1    9.32    1.99 
  -4  19  -1   14.28    1.90 
   4  19   1   11.30    1.37 
   4  19   1   17.80    2.37 
   4  19   1   17.37    2.15 
   4  19   1   17.92    2.70 
  -5 -19  -1   25.04    3.25 
   5 -19   1   22.11    3.27 
  -5 -19  -1   26.42    3.12 
   5 -19   1   32.36    3.80 
  -5 -19  -1   32.80    3.05 
   5 -19   1   27.93    3.12 
   5  19   1   37.51    3.27 
  -5  19  -1   23.80    3.26 
  -5  19  -1   28.29    2.95 
   5  19   1   24.93    3.31 
   5  19   1   30.33    2.92 
  -5  19  -1   30.34    2.54 
   6 -19   1    3.57    2.43 
   6 -19   1    3.27    2.86 
  -6 -19  -1    1.60    2.39 
  -6 -19  -1    3.93    2.29 
  -6 -19  -1    1.98    2.53 
   6 -19   1    3.45    2.94 
  -6  19  -1    2.02    2.07 
   6  19   1    2.32    1.95 
   6  19   1   -0.17    2.09 
  -6  19  -1    1.47    1.92 
  -6  19  -1    2.12    2.77 
   6  19   1    1.59    2.49 
   7 -19   1    1.46    2.63 
  -7 -19  -1    4.22    2.63 
  -7 -19  -1    6.83    3.00 
  -7 -19  -1    3.67    2.88 
   7 -19   1    3.39    3.20 
   7 -19   1    3.79    3.15 
   7  19   1    3.65    2.92 
   7  19   1    4.77    2.55 
   7  19   1    2.19    2.21 
  -7  19  -1    4.29    2.39 
  -7  19  -1    5.21    3.09 
  -7  19  -1    3.96    2.05 
  -8 -19  -1    9.03    3.41 
  -8 -19  -1   13.44    3.58 
   8 -19   1    8.10    3.80 
   8 -19   1    8.77    3.69 
   8 -19   1    5.59    2.99 
   8  19   1    9.33    3.37 
   8  19   1    8.16    2.68 
  -8  19  -1    7.58    2.83 
   8  19   1    8.18    2.86 
  -8  19  -1   10.37    4.07 
  -9 -19  -1   16.35    3.86 
   9 -19   1    9.76    4.18 
   9 -19   1   16.30    3.78 
  -9 -19  -1   15.26    3.85 
   9 -19   1    6.18    4.48 
  -9  19  -1   14.28    3.23 
   9  19   1   10.18    3.23 
   9  19   1   15.34    3.15 
   9  19   1   14.26    3.82 
  -9  19  -1   11.97    3.23 
  -9  19  -1   12.35    4.40 
 -10 -19  -1    8.65    3.81 
  10 -19   1    5.49    4.29 
  10 -19   1    3.15    4.60 
 -10 -19  -1    9.48    4.03 
  10  19   1   10.70    3.30 
  10  19   1   11.17    3.72 
 -10  19  -1    8.34    3.38 
 -10  19  -1    8.19    4.88 
  11  19   1    1.30    3.35 
 -11 -20   1   20.84    4.98 
  11 -20  -1   21.63    5.39 
  11  20  -1   29.04    4.43 
 -11  20   1   31.11    4.04 
  10 -20  -1    2.25    3.81 
 -10 -20   1    2.63    3.39 
  10 -20  -1    2.49    3.93 
 -10 -20   1   -0.50    3.27 
 -10 -20   1    5.62    2.91 
  10  20  -1    5.51    3.27 
  10  20  -1   -0.33    2.77 
 -10  20   1    3.24    2.97 
 -10  20   1   -3.54    2.65 
 -10  20   1   -0.46    3.77 
   9 -20  -1   53.27    5.82 
   9 -20  -1   41.95    4.24 
   9 -20  -1   43.25    5.32 
  -9 -20   1   34.21    4.65 
  -9 -20   1   51.10    5.31 
   9  20  -1   59.24    4.81 
   9  20  -1   42.28    4.24 
  -9  20   1   44.69    4.12 
  -9  20   1   51.96    6.16 
  -9  20   1   34.23    4.13 
  -8 -20   1  153.27    8.35 
   8 -20  -1  132.22    8.64 
  -8 -20   1  149.23    8.62 
   8 -20  -1  145.07    7.70 
   8 -20  -1  142.56    8.89 
  -8  20   1  148.58    8.79 
   8  20  -1  146.26    7.79 
   8  20  -1  136.24    7.73 
  -8  20   1  139.73    7.80 
  -8  20   1  141.43    7.48 
   7 -20  -1   49.25    4.90 
  -7 -20   1   52.27    4.60 
   7 -20  -1   52.46    4.77 
   7 -20  -1   50.99    4.27 
  -7 -20   1   46.19    4.69 
  -7  20   1   54.30    4.29 
   7  20  -1   61.05    4.53 
   7  20  -1   45.09    3.82 
   7  20  -1   53.70    4.25 
  -7  20   1   50.32    4.79 
  -7  20   1   48.15    4.05 
   6 -20  -1   19.60    2.99 
  -6 -20   1   18.44    3.13 
   6 -20  -1   17.22    3.28 
   6 -20  -1   15.51    2.93 
  -6 -20   1   22.84    2.80 
  -6 -20   1   21.26    3.24 
  -6  20   1   22.84    2.68 
   6  20  -1   21.28    2.77 
   6  20  -1   22.42    2.87 
   6  20  -1   19.11    2.47 
  -6  20   1   24.14    3.28 
  -6  20   1   22.26    2.59 
  -5 -20   1  103.94    6.03 
   5 -20  -1  108.52    6.33 
   5 -20  -1  106.81    5.87 
  -5 -20   1  102.43    5.55 
  -5 -20   1  102.08    5.98 
   5 -20  -1  102.81    5.99 
   5  20  -1  107.05    5.95 
  -5  20   1  105.15    5.68 
   5  20  -1  103.65    5.30 
   5  20  -1  110.37    5.79 
  -5  20   1  104.43    6.09 
  -5  20   1  104.58    5.50 
   5  20  -1   97.78    5.63 
   4 -20  -1  133.06    6.64 
  -4 -20   1  132.38    6.43 
  -4 -20   1  121.33    6.62 
  -4 -20   1  126.90    6.67 
   4 -20  -1  133.16    6.74 
   4 -20  -1  132.97    6.88 
   4  20  -1  140.11    6.49 
   4  20  -1  126.89    6.57 
   4  20  -1  128.07    6.12 
   4  20  -1  123.93    6.42 
  -4  20   1  123.01    6.23 
  -4  20   1  136.89    6.62 
  -4  20   1  126.82    6.45 
   3 -20  -1   69.90    4.35 
   3 -20  -1   71.54    4.55 
  -3 -20   1   71.17    4.51 
  -3 -20   1   70.47    4.33 
  -3 -20   1   72.93    4.42 
   3 -20  -1   76.23    4.71 
  -3  20   1   69.33    4.13 
   3  20  -1   71.67    3.88 
   3  20  -1   70.27    4.20 
  -3  20   1   75.24    4.32 
   3  20  -1   69.80    4.23 
  -3  20   1   69.07    4.26 
   3  20  -1   76.17    4.32 
  -2 -20   1   17.27    2.21 
   2 -20  -1   20.52    2.46 
   2 -20  -1   16.09    2.11 
  -2 -20   1   16.18    2.54 
  -2 -20   1   24.94    2.59 
   2 -20  -1   19.64    2.11 
   2 -20  -1   18.27    2.61 
  -2  20   1   17.90    2.27 
  -2  20   1   16.14    2.12 
   2  20  -1   19.63    2.04 
   2  20  -1   20.22    2.26 
  -2  20   1   17.99    1.53 
  -2  20   1   19.27    2.18 
   2  20  -1   23.07    2.26 
   2  20  -1   17.62    2.07 
  -1 -20   1  215.94    9.70 
  -1 -20   1  213.92   10.04 
  -1 -20   1  221.01   10.04 
   1 -20  -1  220.70    9.88 
   1 -20  -1  236.95    9.81 
   1 -20  -1  220.48   10.12 
  -1 -20   1  224.00    9.61 
   1  20  -1  215.12    9.97 
  -1  20   1  225.45    9.52 
  -1  20   1  233.68   10.04 
  -1  20   1  231.16    9.86 
  -1  20   1  232.24    9.95 
   1  20  -1  245.18    9.88 
   1  20  -1  251.30   10.02 
   0 -20   1  146.03    7.05 
   0 -20   1  136.97    6.80 
   0 -20  -1  138.26    7.05 
   0 -20  -1  149.19    6.69 
   0 -20  -1  140.62    6.78 
   0 -20   1  136.63    6.34 
   0 -20   1  142.94    6.77 
   0  20  -1  146.84    6.94 
   0  20  -1  149.06    6.68 
   0  20   1  154.91    6.89 
   0  20   1  149.29    6.59 
   0  20   1  152.60    6.67 
   0  20  -1  151.31    6.98 
   0  20   1  149.84    6.88 
   1 -20   1    4.70    1.92 
  -1 -20  -1   -0.61    1.77 
   1 -20   1    2.89    1.98 
   1 -20   1    2.37    1.69 
  -1 -20  -1    4.46    1.52 
  -1 -20  -1    3.53    2.05 
   1  20   1    2.57    1.64 
   1  20   1    2.40    1.20 
  -1  20  -1    2.82    1.78 
  -1  20  -1    2.76    1.77 
   1  20   1    3.35    1.59 
  -1  20  -1    4.45    1.56 
   1  20   1    3.61    1.66 
  -2 -20  -1   24.68    2.61 
  -2 -20  -1   21.77    2.69 
   2 -20   1   26.13    2.90 
   2 -20   1   31.45    2.43 
   2 -20   1   25.78    2.78 
  -2 -20  -1   22.29    2.53 
  -2  20  -1   28.94    2.30 
   2  20   1   24.88    2.51 
  -2  20  -1   20.83    2.46 
  -2  20  -1   22.37    2.76 
   2  20   1   21.05    1.82 
   2  20   1   26.86    2.72 
   2  20   1   30.51    2.57 
  -3 -20  -1  103.29    5.39 
  -3 -20  -1   99.71    5.45 
   3 -20   1  102.87    5.00 
   3 -20   1   96.36    5.50 
  -3 -20  -1  104.83    5.42 
   3 -20   1  102.89    5.87 
   3  20   1   81.68    4.41 
  -3  20  -1  101.11    5.74 
   3  20   1   98.86    5.21 
  -3  20  -1   99.66    5.32 
  -3  20  -1   99.81    4.95 
   3  20   1  105.28    5.68 
   3  20   1  104.36    5.32 
  -4 -20  -1   45.75    3.75 
  -4 -20  -1   35.52    3.32 
  -4 -20  -1   38.08    3.18 
   4 -20   1   33.59    3.61 
   4 -20   1   37.49    3.43 
   4 -20   1   33.76    2.77 
   4 -20   1   44.14    4.07 
  -4  20  -1   33.80    3.46 
   4  20   1   44.77    3.45 
   4  20   1   39.85    3.67 
  -4  20  -1   26.72    2.94 
  -4  20  -1   34.70    2.87 
   4  20   1   25.37    2.22 
   4  20   1   31.63    2.91 
   5 -20   1    3.15    2.81 
  -5 -20  -1    9.94    2.34 
  -5 -20  -1    6.15    2.46 
   5 -20   1    8.84    2.66 
  -5 -20  -1   10.01    2.57 
   5 -20   1    7.32    2.68 
   5  20   1    4.14    2.12 
  -5  20  -1    5.72    1.81 
   5  20   1    9.96    2.62 
   5  20   1    5.00    1.95 
  -5  20  -1    3.78    2.37 
  -5  20  -1    7.98    2.23 
  -6 -20  -1   36.38    3.87 
   6 -20   1   38.57    4.41 
   6 -20   1   40.80    4.02 
   6 -20   1   38.86    4.25 
  -6 -20  -1   49.80    3.83 
  -6 -20  -1   40.95    4.17 
   6  20   1   36.28    3.62 
  -6  20  -1   34.35    3.51 
  -6  20  -1   40.73    3.26 
   6  20   1   34.64    3.36 
   6  20   1   42.85    4.24 
  -6  20  -1   38.51    4.31 
  -7 -20  -1   80.01    6.04 
   7 -20   1   66.11    6.04 
   7 -20   1   71.13    5.76 
  -7 -20  -1   73.54    5.98 
  -7 -20  -1   82.85    5.60 
   7 -20   1   80.77    6.76 
   7  20   1   74.87    5.20 
   7  20   1   80.53    6.20 
  -7  20  -1   77.91    5.44 
  -7  20  -1   86.05    4.95 
   7  20   1   80.19    5.52 
  -7  20  -1   65.90    6.15 
   8 -20   1   50.17    4.55 
   8 -20   1   46.61    5.54 
  -8 -20  -1   49.94    5.38 
   8 -20   1   54.28    5.99 
  -8 -20  -1   50.88    5.19 
   8  20   1   47.25    4.30 
  -8  20  -1   39.57    4.35 
   8  20   1   57.14    5.65 
   8  20   1   51.41    4.96 
  -8  20  -1   48.19    4.07 
  -8  20  -1   47.72    5.83 
  -9 -20  -1   -7.01    3.08 
   9 -20   1    5.44    4.09 
  -9 -20  -1   -0.02    3.45 
   9 -20   1    0.72    3.92 
   9 -20   1    7.54    3.60 
   9  20   1    3.52    3.51 
   9  20   1   -1.79    2.79 
  -9  20  -1    0.52    2.87 
  -9  20  -1    1.14    4.16 
   9  20   1    4.86    2.79 
  10 -20   1   34.86    6.27 
  10 -20   1   45.73    6.14 
 -10 -20  -1   40.07    5.26 
 -10 -20  -1   33.18    4.97 
  10  20   1   52.03    5.01 
  10  20   1   30.50    4.76 
 -10  20  -1   46.72    7.09 
 -10  20  -1   38.32    4.81 
 -11 -21   1   28.18    5.69 
  10 -21  -1   33.93    5.37 
 -10 -21   1   29.33    4.75 
  10 -21  -1   38.76    5.56 
 -10 -21   1   26.10    3.93 
 -10 -21   1   38.44    5.00 
  10  21  -1   32.33    4.60 
 -10  21   1   36.41    5.61 
  10  21  -1   36.28    4.47 
 -10  21   1   38.56    4.43 
  -9 -21   1   18.12    4.08 
  -9 -21   1   15.02    4.01 
   9 -21  -1   15.88    4.22 
   9 -21  -1   14.37    3.35 
   9 -21  -1   12.23    4.05 
  -9  21   1   15.59    3.96 
  -9  21   1   17.52    4.73 
   9  21  -1   16.95    3.18 
  -9  21   1   11.13    3.10 
   9  21  -1   12.39    3.22 
   8 -21  -1    0.83    3.16 
   8 -21  -1    1.89    2.96
[truncated: 2,206,488 more chars]
