# Supplementary material
Source: MDPI journal article supplement (https://www.mdpi.com/2304-6740/7/9/105)
Supplement: s1 [file s1 › Complex4_CIF.cif]

 
data_s1_a 
  
_audit_creation_method            'SHELXL-2017/1' 
_shelx_SHELXL_version_number      '2017/1' 
_chemical_name_systematic         ? 
_chemical_name_common             ? 
_chemical_melting_point           ? 
_chemical_formula_moiety          ? 
_chemical_formula_sum 
 'C36 H53 N2 P U' 
_chemical_formula_weight          782.80 
  
loop_ 
 _atom_type_symbol 
 _atom_type_description 
 _atom_type_scat_dispersion_real 
 _atom_type_scat_dispersion_imag 
 _atom_type_scat_source 
 'C'  'C'   0.0033   0.0016 
 'International Tables Vol C Tables 4.2.6.8 and 6.1.1.4' 
 'H'  'H'   0.0000   0.0000 
 'International Tables Vol C Tables 4.2.6.8 and 6.1.1.4' 
 'N'  'N'   0.0061   0.0033 
 'International Tables Vol C Tables 4.2.6.8 and 6.1.1.4' 
 'P'  'P'   0.1023   0.0942 
 'International Tables Vol C Tables 4.2.6.8 and 6.1.1.4' 
 'U'  'U'  -9.6767   9.6646 
 'International Tables Vol C Tables 4.2.6.8 and 6.1.1.4' 
  
_space_group_crystal_system       monoclinic 
_space_group_IT_number            14 
_space_group_name_H-M_alt         'P 21/c' 
_space_group_name_Hall            '-P 2ybc' 
  
_shelx_space_group_comment 
; 
The symmetry employed for this shelxl refinement is uniquely defined 
by the following loop, which should always be used as a source of 
symmetry information in preference to the above space-group names. 
They are only intended as comments. 
; 
  
loop_ 
 _space_group_symop_operation_xyz 
 'x, y, z' 
 '-x, y+1/2, -z+1/2' 
 '-x, -y, -z' 
 'x, -y-1/2, z-1/2' 
  
_cell_length_a                    10.0337(4) 
_cell_length_b                    33.6762(14) 
_cell_length_c                    10.7644(4) 
_cell_angle_alpha                 90 
_cell_angle_beta                  107.4770(10) 
_cell_angle_gamma                 90 
_cell_volume                      3469.4(2) 
_cell_formula_units_Z             4 
_cell_measurement_temperature     100(2) 
_cell_measurement_reflns_used     9968 
_cell_measurement_theta_min       2.21 
_cell_measurement_theta_max       26.44 
  
_exptl_crystal_description        plate 
_exptl_crystal_colour             brown 
_exptl_crystal_density_meas       ? 
_exptl_crystal_density_method     'not measured' 
_exptl_crystal_density_diffrn     1.499 
_exptl_crystal_F_000              1560 
_exptl_transmission_factor_min    ? 
_exptl_transmission_factor_max    ? 
_exptl_crystal_size_max           0.110 
_exptl_crystal_size_mid           0.040 
_exptl_crystal_size_min           0.010 
_exptl_absorpt_coefficient_mu     4.750 
_shelx_estimated_absorpt_T_min    0.623 
_shelx_estimated_absorpt_T_max    0.954 
_exptl_absorpt_correction_type    multi-scan 
_exptl_absorpt_correction_T_min   0.4798   
_exptl_absorpt_correction_T_max   0.5624
_exptl_absorpt_process_details    'Bruker AXScale' 
_exptl_absorpt_special_details    ? 
_diffrn_ambient_temperature       100(2) 
_diffrn_radiation_wavelength      0.71073 
_diffrn_radiation_type            MoK\a 
_diffrn_source                    ? 
_diffrn_measurement_device_type   'Bruker APEX-II CCD' 
_diffrn_measurement_method        '\f and \w scans' 
_diffrn_detector_area_resol_mean  ? 
_diffrn_reflns_number             63680 
_diffrn_reflns_av_unetI/netI      0.0315 
_diffrn_reflns_av_R_equivalents   0.0543 
_diffrn_reflns_limit_h_min        -12 
_diffrn_reflns_limit_h_max        12 
_diffrn_reflns_limit_k_min        -42 
_diffrn_reflns_limit_k_max        42 
_diffrn_reflns_limit_l_min        -13 
_diffrn_reflns_limit_l_max        13 
_diffrn_reflns_theta_min          2.212 
_diffrn_reflns_theta_max          26.482 
_diffrn_reflns_theta_full         25.242 
_diffrn_measured_fraction_theta_max   0.996 
_diffrn_measured_fraction_theta_full  0.999 
_diffrn_reflns_Laue_measured_fraction_max    0.996 
_diffrn_reflns_Laue_measured_fraction_full   0.999 
_diffrn_reflns_point_group_measured_fraction_max   0.996 
_diffrn_reflns_point_group_measured_fraction_full  0.999 
_reflns_number_total              7159 
_reflns_number_gt                 6047 
_reflns_threshold_expression      'I > 2\s(I)' 
_reflns_Friedel_coverage          0.000 
_reflns_Friedel_fraction_max      . 
_reflns_Friedel_fraction_full     . 
  
_reflns_special_details 
; 
 Reflections were merged by SHELXL according to the crystal 
 class for the calculation of statistics and refinement. 
  
 _reflns_Friedel_fraction is defined as the number of unique 
 Friedel pairs measured divided by the number that would be 
 possible theoretically, ignoring centric projections and 
 systematic absences. 
; 
  
_computing_data_collection        'Bruker APEX2' 
_computing_cell_refinement        'Bruker SAINT' 
_computing_data_reduction         'Bruker SAINT' 
_computing_structure_solution     'SHELXT 2014/5 (Sheldrick, 2014)' 
_computing_structure_refinement 'SHELXL-2017/1 (Sheldrick, 2017)' 
_computing_molecular_graphics     'Bruker SHELXTL' 
_computing_publication_material   'Bruker SHELXTL' 
_refine_special_details           ? 
_refine_ls_structure_factor_coef  Fsqd 
_refine_ls_matrix_type            full 
_refine_ls_weighting_scheme       calc 
_refine_ls_weighting_details 
'w=1/[\s^2^(Fo^2^)+(0.0098P)^2^+6.5497P] where P=(Fo^2^+2Fc^2^)/3' 
_atom_sites_solution_primary      iterative 
_atom_sites_solution_secondary    difmap 
_atom_sites_solution_hydrogens    geom 
_refine_ls_hydrogen_treatment     constr 
_refine_ls_extinction_method      none 
_refine_ls_extinction_coef        . 
_refine_ls_number_reflns          7159 
_refine_ls_number_parameters      377 
_refine_ls_number_restraints      0 
_refine_ls_R_factor_all           0.0376 
_refine_ls_R_factor_gt            0.0264 
_refine_ls_wR_factor_ref          0.0459 
_refine_ls_wR_factor_gt           0.0437 
_refine_ls_goodness_of_fit_ref    1.062 
_refine_ls_restrained_S_all       1.062 
_refine_ls_shift/su_max           0.008 
_refine_ls_shift/su_mean          0.000 
  
loop_ 
 _atom_site_label 
 _atom_site_type_symbol 
 _atom_site_fract_x 
 _atom_site_fract_y 
 _atom_site_fract_z 
 _atom_site_U_iso_or_equiv 
 _atom_site_adp_type 
 _atom_site_occupancy 
 _atom_site_site_symmetry_order 
 _atom_site_calc_flag 
 _atom_site_refinement_flags_posn 
 _atom_site_refinement_flags_adp 
 _atom_site_refinement_flags_occupancy 
 _atom_site_disorder_assembly 
 _atom_site_disorder_group 
U1 U 0.63077(2) 0.61533(2) 0.34055(2) 0.01171(4) Uani 1 1 d . . . . . 
P1 P 0.25254(9) 0.66407(3) 0.15843(8) 0.01856(19) Uani 1 1 d . . . . . 
N1 N 0.9128(3) 0.66587(8) 0.5968(3) 0.0171(6) Uani 1 1 d . . . . . 
N2 N 0.5187(3) 0.67426(7) 0.3354(2) 0.0144(6) Uani 1 1 d . . . . . 
C1 C 0.6345(3) 0.58723(10) 0.5829(3) 0.0179(7) Uani 1 1 d . . . . . 
C2 C 0.7002(3) 0.55704(9) 0.5299(3) 0.0178(7) Uani 1 1 d . . . . . 
C3 C 0.5968(3) 0.53948(9) 0.4235(3) 0.0178(7) Uani 1 1 d . . . . . 
C4 C 0.4684(4) 0.55937(10) 0.4109(3) 0.0196(7) Uani 1 1 d . . . . . 
C5 C 0.4922(3) 0.58870(10) 0.5095(3) 0.0184(7) Uani 1 1 d . . . . . 
C6 C 0.6981(4) 0.60875(11) 0.7096(3) 0.0256(8) Uani 1 1 d . . . . . 
H6A H 0.667644 0.596132 0.778557 0.038 Uiso 1 1 calc R U . . . 
H6B H 0.667719 0.636546 0.700366 0.038 Uiso 1 1 calc R U . . . 
H6C H 0.800156 0.607580 0.732349 0.038 Uiso 1 1 calc R U . . . 
C7 C 0.8497(4) 0.54396(11) 0.5877(3) 0.0253(8) Uani 1 1 d . . . . . 
H7A H 0.863503 0.534089 0.676324 0.038 Uiso 1 1 calc R U . . . 
H7B H 0.912118 0.566523 0.590243 0.038 Uiso 1 1 calc R U . . . 
H7C H 0.870659 0.522742 0.534099 0.038 Uiso 1 1 calc R U . . . 
C8 C 0.6099(4) 0.50247(10) 0.3501(3) 0.0249(8) Uani 1 1 d . . . . . 
H8A H 0.553939 0.481232 0.371818 0.037 Uiso 1 1 calc R U . . . 
H8B H 0.708084 0.494281 0.374308 0.037 Uiso 1 1 calc R U . . . 
H8C H 0.576196 0.507772 0.256324 0.037 Uiso 1 1 calc R U . . . 
C9 C 0.3269(4) 0.54693(11) 0.3237(4) 0.0287(9) Uani 1 1 d . . . . . 
H9A H 0.280558 0.530283 0.373031 0.043 Uiso 1 1 calc R U . . . 
H9B H 0.338151 0.531834 0.249666 0.043 Uiso 1 1 calc R U . . . 
H9C H 0.269978 0.570568 0.291773 0.043 Uiso 1 1 calc R U . . . 
C10 C 0.3814(3) 0.61335(11) 0.5401(3) 0.0259(8) Uani 1 1 d . . . . . 
H10A H 0.321222 0.596167 0.573577 0.039 Uiso 1 1 calc R U . . . 
H10B H 0.325089 0.626681 0.460742 0.039 Uiso 1 1 calc R U . . . 
H10C H 0.425593 0.633281 0.605888 0.039 Uiso 1 1 calc R U . . . 
C11 C 0.8776(3) 0.61654(10) 0.2742(3) 0.0158(6) Uani 1 1 d . . . . . 
C12 C 0.7933(3) 0.64769(9) 0.2033(3) 0.0143(7) Uani 1 1 d . . . . . 
C13 C 0.6786(3) 0.63039(9) 0.1058(3) 0.0149(7) Uani 1 1 d . . . . . 
C14 C 0.6927(3) 0.58846(9) 0.1183(3) 0.0156(7) Uani 1 1 d . . . . . 
C15 C 0.8153(3) 0.58002(9) 0.2225(3) 0.0164(7) Uani 1 1 d . . . . . 
C16 C 1.0215(3) 0.62010(10) 0.3679(3) 0.0212(7) Uani 1 1 d . . . . . 
H16A H 1.090622 0.613200 0.323639 0.032 Uiso 1 1 calc R U . . . 
H16B H 1.030899 0.601988 0.441281 0.032 Uiso 1 1 calc R U . . . 
H16C H 1.037129 0.647451 0.400091 0.032 Uiso 1 1 calc R U . . . 
C17 C 0.8305(4) 0.69109(10) 0.2159(3) 0.0216(8) Uani 1 1 d . . . . . 
H17A H 0.883141 0.697807 0.155392 0.032 Uiso 1 1 calc R U . . . 
H17B H 0.887861 0.696734 0.305285 0.032 Uiso 1 1 calc R U . . . 
H17C H 0.744870 0.706995 0.195190 0.032 Uiso 1 1 calc R U . . . 
C18 C 0.5755(3) 0.65372(10) 0.0005(3) 0.0199(7) Uani 1 1 d . . . . . 
H18A H 0.624516 0.666866 -0.054328 0.030 Uiso 1 1 calc R U . . . 
H18B H 0.530351 0.673760 0.040258 0.030 Uiso 1 1 calc R U . . . 
H18C H 0.504498 0.635712 -0.053035 0.030 Uiso 1 1 calc R U . . . 
C19 C 0.6068(4) 0.55784(10) 0.0253(3) 0.0191(7) Uani 1 1 d . . . . . 
H19A H 0.668382 0.541818 -0.010205 0.029 Uiso 1 1 calc R U . . . 
H19B H 0.537248 0.571302 -0.046015 0.029 Uiso 1 1 calc R U . . . 
H19C H 0.559306 0.540582 0.071878 0.029 Uiso 1 1 calc R U . . . 
C20 C 0.8865(4) 0.54048(10) 0.2549(3) 0.0223(8) Uani 1 1 d . . . . . 
H20A H 0.963033 0.538730 0.216025 0.033 Uiso 1 1 calc R U . . . 
H20B H 0.818982 0.519204 0.220057 0.033 Uiso 1 1 calc R U . . . 
H20C H 0.924003 0.537704 0.349626 0.033 Uiso 1 1 calc R U . . . 
C21 C 0.8217(3) 0.65150(9) 0.5177(3) 0.0169(7) Uani 1 1 d . . . . . 
C22 C 1.0265(4) 0.68570(10) 0.6962(3) 0.0236(8) Uani 1 1 d . . . . . 
C23 C 0.9675(4) 0.69918(12) 0.8043(4) 0.0330(9) Uani 1 1 d . . . . . 
H23A H 0.932300 0.676092 0.840163 0.050 Uiso 1 1 calc R U . . . 
H23B H 0.891041 0.717991 0.768824 0.050 Uiso 1 1 calc R U . . . 
H23C H 1.041354 0.712106 0.873379 0.050 Uiso 1 1 calc R U . . . 
C24 C 1.1429(4) 0.65545(13) 0.7458(4) 0.0372(10) Uani 1 1 d . . . . . 
H24A H 1.105852 0.631877 0.777401 0.056 Uiso 1 1 calc R U . . . 
H24B H 1.217673 0.667107 0.817104 0.056 Uiso 1 1 calc R U . . . 
H24C H 1.180174 0.647880 0.674800 0.056 Uiso 1 1 calc R U . . . 
C25 C 1.0722(4) 0.72098(12) 0.6298(4) 0.0387(10) Uani 1 1 d . . . . . 
H25A H 1.108999 0.711368 0.560644 0.058 Uiso 1 1 calc R U . . . 
H25B H 1.145066 0.735868 0.694027 0.058 Uiso 1 1 calc R U . . . 
H25C H 0.991849 0.738350 0.592101 0.058 Uiso 1 1 calc R U . . . 
C26 C 0.4226(3) 0.65257(9) 0.2480(3) 0.0138(7) Uani 1 1 d . . . . . 
C27 C 0.5007(3) 0.71609(9) 0.3739(3) 0.0184(7) Uani 1 1 d . . . . . 
C28 C 0.4742(4) 0.74324(10) 0.2551(3) 0.0226(8) Uani 1 1 d . . . . . 
H28A H 0.553954 0.741872 0.220521 0.034 Uiso 1 1 calc R U . . . 
H28B H 0.462252 0.770623 0.280667 0.034 Uiso 1 1 calc R U . . . 
H28C H 0.389412 0.734611 0.188060 0.034 Uiso 1 1 calc R U . . . 
C29 C 0.6357(4) 0.72896(10) 0.4751(3) 0.0243(8) Uani 1 1 d . . . . . 
H29A H 0.713441 0.726820 0.438023 0.037 Uiso 1 1 calc R U . . . 
H29B H 0.653593 0.711790 0.551884 0.037 Uiso 1 1 calc R U . . . 
H29C H 0.626827 0.756551 0.500498 0.037 Uiso 1 1 calc R U . . . 
C30 C 0.3796(4) 0.71909(10) 0.4325(3) 0.0235(8) Uani 1 1 d . . . . . 
H30A H 0.293431 0.709729 0.368872 0.035 Uiso 1 1 calc R U . . . 
H30B H 0.367920 0.746800 0.455038 0.035 Uiso 1 1 calc R U . . . 
H30C H 0.399935 0.702660 0.511145 0.035 Uiso 1 1 calc R U . . . 
C31 C 0.1926(3) 0.61777(10) 0.0716(3) 0.0163(7) Uani 1 1 d . . . . . 
C32 C 0.2769(4) 0.59075(10) 0.0315(3) 0.0204(7) Uani 1 1 d . . . . . 
H32A H 0.373635 0.596344 0.049215 0.024 Uiso 1 1 calc R U . . . 
C33 C 0.2236(4) 0.55611(11) -0.0330(3) 0.0257(8) Uani 1 1 d . . . . . 
H33A H 0.283503 0.538455 -0.059901 0.031 Uiso 1 1 calc R U . . . 
C34 C 0.0827(4) 0.54691(11) -0.0589(3) 0.0267(8) Uani 1 1 d . . . . . 
H34A H 0.046454 0.522667 -0.100682 0.032 Uiso 1 1 calc R U . . . 
C35 C -0.0033(4) 0.57352(11) -0.0231(3) 0.0245(8) Uani 1 1 d . . . . . 
H35A H -0.100115 0.567843 -0.041819 0.029 Uiso 1 1 calc R U . . . 
C36 C 0.0502(3) 0.60847(10) 0.0400(3) 0.0202(7) Uani 1 1 d . . . . . 
H36A H -0.011225 0.626642 0.062425 0.024 Uiso 1 1 calc R U . . . 
  
loop_ 
 _atom_site_aniso_label 
 _atom_site_aniso_U_11 
 _atom_site_aniso_U_22 
 _atom_site_aniso_U_33 
 _atom_site_aniso_U_23 
 _atom_site_aniso_U_13 
 _atom_site_aniso_U_12 
U1 0.01226(6) 0.01036(6) 0.01305(6) 0.00164(5) 0.00463(4) 0.00071(6) 
P1 0.0169(5) 0.0187(5) 0.0181(4) -0.0029(3) 0.0023(4) 0.0033(4) 
N1 0.0169(15) 0.0153(14) 0.0206(15) 0.0038(12) 0.0079(13) 0.0019(12) 
N2 0.0183(14) 0.0117(13) 0.0141(14) 0.0008(11) 0.0061(12) 0.0021(11) 
C1 0.0188(18) 0.0189(17) 0.0169(17) 0.0073(14) 0.0065(15) -0.0023(14) 
C2 0.0186(18) 0.0154(17) 0.0192(18) 0.0091(14) 0.0055(15) 0.0034(14) 
C3 0.0227(18) 0.0128(16) 0.0189(17) 0.0068(13) 0.0075(15) -0.0007(14) 
C4 0.0229(19) 0.0166(17) 0.0182(18) 0.0088(14) 0.0046(15) -0.0051(14) 
C5 0.0183(18) 0.0173(17) 0.0222(18) 0.0073(14) 0.0099(15) -0.0024(14) 
C6 0.030(2) 0.029(2) 0.0192(18) -0.0003(15) 0.0099(16) -0.0062(16) 
C7 0.0216(19) 0.027(2) 0.026(2) 0.0093(16) 0.0048(16) 0.0060(16) 
C8 0.035(2) 0.0164(17) 0.025(2) 0.0027(15) 0.0128(17) -0.0032(16) 
C9 0.026(2) 0.029(2) 0.027(2) 0.0101(16) 0.0026(17) -0.0085(17) 
C10 0.0214(18) 0.0289(19) 0.032(2) 0.0077(18) 0.0151(16) 0.0006(17) 
C11 0.0124(15) 0.0214(17) 0.0167(16) 0.0009(15) 0.0090(13) 0.0025(15) 
C12 0.0155(16) 0.0162(17) 0.0150(16) 0.0026(13) 0.0103(14) -0.0012(13) 
C13 0.0172(17) 0.0159(16) 0.0144(16) 0.0006(13) 0.0088(14) 0.0005(13) 
C14 0.0160(17) 0.0162(17) 0.0172(17) -0.0011(13) 0.0090(15) -0.0004(14) 
C15 0.0178(17) 0.0170(17) 0.0174(17) 0.0023(14) 0.0097(15) 0.0029(14) 
C16 0.0158(16) 0.0260(19) 0.0225(18) -0.0021(15) 0.0069(14) 0.0005(15) 
C17 0.0246(19) 0.0170(18) 0.0245(19) 0.0001(14) 0.0094(16) -0.0024(15) 
C18 0.0231(18) 0.0179(17) 0.0180(17) 0.0034(14) 0.0053(15) 0.0012(15) 
C19 0.0229(19) 0.0172(17) 0.0205(18) -0.0036(14) 0.0116(15) 0.0019(14) 
C20 0.0246(19) 0.0174(18) 0.027(2) 0.0016(15) 0.0112(16) 0.0062(15) 
C21 0.0200(18) 0.0127(16) 0.0196(18) 0.0016(14) 0.0081(16) 0.0008(14) 
C22 0.0192(18) 0.0254(19) 0.0226(19) -0.0060(15) 0.0007(16) -0.0055(15) 
C23 0.033(2) 0.034(2) 0.028(2) -0.0114(17) 0.0029(18) 0.0041(18) 
C24 0.025(2) 0.050(3) 0.030(2) -0.005(2) -0.0028(18) 0.0125(19) 
C25 0.034(2) 0.034(2) 0.046(3) -0.0068(19) 0.007(2) -0.0134(19) 
C26 0.0169(16) 0.0169(16) 0.0096(15) 0.0021(13) 0.0071(13) 0.0011(13) 
C27 0.0232(19) 0.0147(17) 0.0162(17) -0.0011(13) 0.0046(15) 0.0053(14) 
C28 0.029(2) 0.0135(17) 0.0246(19) 0.0015(14) 0.0071(16) 0.0045(15) 
C29 0.026(2) 0.0156(17) 0.028(2) -0.0068(15) 0.0020(16) 0.0028(15) 
C30 0.030(2) 0.0227(19) 0.0186(18) -0.0036(15) 0.0090(16) 0.0064(16) 
C31 0.0185(16) 0.0211(17) 0.0078(14) 0.0013(14) 0.0016(13) 0.0012(15) 
C32 0.0155(17) 0.0227(19) 0.0224(19) -0.0027(15) 0.0048(15) 0.0005(14) 
C33 0.025(2) 0.026(2) 0.027(2) -0.0077(16) 0.0092(17) 0.0026(16) 
C34 0.030(2) 0.025(2) 0.0229(19) -0.0086(15) 0.0034(17) -0.0042(16) 
C35 0.0158(18) 0.036(2) 0.0203(19) -0.0011(16) 0.0027(15) -0.0069(16) 
C36 0.0179(17) 0.026(2) 0.0156(17) 0.0038(14) 0.0030(14) 0.0037(14) 
  
_geom_special_details 
; 
 All esds (except the esd in the dihedral angle between two l.s. planes) 
 are estimated using the full covariance matrix.  The cell esds are taken 
 into account individually in the estimation of esds in distances, angles 
 and torsion angles; correlations between esds in cell parameters are only 
 used when they are defined by crystal symmetry.  An approximate (isotropic) 
 treatment of cell esds is used for estimating esds involving l.s. planes. 
; 
  
loop_ 
 _geom_bond_atom_site_label_1 
 _geom_bond_atom_site_label_2 
 _geom_bond_distance 
 _geom_bond_site_symmetry_2 
 _geom_bond_publ_flag 
U1 N2 2.273(2) . ? 
U1 C26 2.383(3) . ? 
U1 C21 2.568(3) . ? 
U1 C12 2.734(3) . ? 
U1 C4 2.742(3) . ? 
U1 C5 2.750(3) . ? 
U1 C13 2.757(3) . ? 
U1 C3 2.760(3) . ? 
U1 C2 2.764(3) . ? 
U1 C1 2.765(3) . ? 
U1 C11 2.777(3) . ? 
U1 C14 2.796(3) . ? 
P1 C26 1.733(3) . ? 
P1 C31 1.825(3) . ? 
N1 C21 1.152(4) . ? 
N1 C22 1.469(4) . ? 
N2 C26 1.343(4) . ? 
N2 C27 1.495(4) . ? 
C1 C5 1.409(5) . ? 
C1 C2 1.421(5) . ? 
C1 C6 1.507(5) . ? 
C2 C3 1.423(5) . ? 
C2 C7 1.506(5) . ? 
C3 C4 1.422(5) . ? 
C3 C8 1.503(5) . ? 
C4 C5 1.417(5) . ? 
C4 C9 1.507(5) . ? 
C5 C10 1.501(5) . ? 
C11 C15 1.416(5) . ? 
C11 C12 1.418(4) . ? 
C11 C16 1.497(4) . ? 
C12 C13 1.428(4) . ? 
C12 C17 1.505(4) . ? 
C13 C14 1.421(4) . ? 
C13 C18 1.506(4) . ? 
C14 C15 1.422(5) . ? 
C14 C19 1.513(4) . ? 
C15 C20 1.502(4) . ? 
C22 C24 1.520(5) . ? 
C22 C23 1.524(5) . ? 
C22 C25 1.526(5) . ? 
C27 C29 1.524(5) . ? 
C27 C28 1.529(4) . ? 
C27 C30 1.531(5) . ? 
C31 C32 1.396(5) . ? 
C31 C36 1.401(4) . ? 
C32 C33 1.381(5) . ? 
C33 C34 1.391(5) . ? 
C34 C35 1.378(5) . ? 
C35 C36 1.384(5) . ? 
  
loop_ 
 _geom_angle_atom_site_label_1 
 _geom_angle_atom_site_label_2 
 _geom_angle_atom_site_label_3 
 _geom_angle 
 _geom_angle_site_symmetry_1 
 _geom_angle_site_symmetry_3 
 _geom_angle_publ_flag 
N2 U1 C26 33.43(10) . . ? 
N2 U1 C21 81.78(10) . . ? 
C26 U1 C21 115.18(10) . . ? 
N2 U1 C12 90.55(9) . . ? 
C26 U1 C12 98.87(10) . . ? 
C21 U1 C12 77.25(10) . . ? 
N2 U1 C4 106.04(10) . . ? 
C26 U1 C4 87.62(10) . . ? 
C21 U1 C4 119.57(10) . . ? 
C12 U1 C4 157.41(10) . . ? 
N2 U1 C5 87.50(9) . . ? 
C26 U1 C5 83.95(10) . . ? 
C21 U1 C5 94.36(10) . . ? 
C12 U1 C5 171.58(10) . . ? 
C4 U1 C5 29.90(10) . . ? 
N2 U1 C13 92.17(9) . . ? 
C26 U1 C13 83.79(10) . . ? 
C21 U1 C13 107.28(10) . . ? 
C12 U1 C13 30.15(9) . . ? 
C4 U1 C13 131.36(10) . . ? 
C5 U1 C13 158.09(10) . . ? 
N2 U1 C3 135.03(10) . . ? 
C26 U1 C3 116.39(10) . . ? 
C21 U1 C3 109.61(10) . . ? 
C12 U1 C3 134.05(10) . . ? 
C4 U1 C3 29.95(10) . . ? 
C5 U1 C3 49.33(10) . . ? 
C13 U1 C3 122.63(9) . . ? 
N2 U1 C2 130.63(9) . . ? 
C26 U1 C2 132.64(10) . . ? 
C21 U1 C2 79.78(10) . . ? 
C12 U1 C2 128.48(10) . . ? 
C4 U1 C2 49.27(10) . . ? 
C5 U1 C2 49.18(10) . . ? 
C13 U1 C2 137.04(10) . . ? 
C3 U1 C2 29.84(10) . . ? 
N2 U1 C1 100.85(9) . . ? 
C26 U1 C1 109.66(10) . . ? 
C21 U1 C1 70.49(10) . . ? 
C12 U1 C1 143.61(10) . . ? 
C4 U1 C1 49.08(10) . . ? 
C5 U1 C1 29.61(10) . . ? 
C13 U1 C1 166.18(10) . . ? 
C3 U1 C1 49.15(10) . . ? 
C2 U1 C1 29.79(10) . . ? 
N2 U1 C11 116.98(10) . . ? 
C26 U1 C11 128.47(10) . . ? 
C21 U1 C11 70.14(10) . . ? 
C12 U1 C11 29.81(9) . . ? 
C4 U1 C11 136.97(10) . . ? 
C5 U1 C11 147.37(10) . . ? 
C13 U1 C11 49.25(9) . . ? 
C3 U1 C11 107.65(10) . . ? 
C2 U1 C11 98.82(10) . . ? 
C1 U1 C11 119.18(9) . . ? 
N2 U1 C14 119.79(9) . . ? 
C26 U1 C14 101.80(10) . . ? 
C21 U1 C14 118.75(10) . . ? 
C12 U1 C14 49.09(9) . . ? 
C4 U1 C14 108.47(10) . . ? 
C5 U1 C14 138.29(10) . . ? 
C13 U1 C14 29.65(9) . . ? 
C3 U1 C14 93.34(9) . . ? 
C2 U1 C14 109.24(9) . . ? 
C1 U1 C14 138.85(9) . . ? 
C11 U1 C14 48.71(9) . . ? 
C26 P1 C31 102.23(15) . . ? 
C21 N1 C22 177.8(3) . . ? 
C26 N2 C27 125.8(3) . . ? 
C26 N2 U1 77.77(17) . . ? 
C27 N2 U1 156.4(2) . . ? 
C5 C1 C2 108.3(3) . . ? 
C5 C1 C6 125.0(3) . . ? 
C2 C1 C6 125.9(3) . . ? 
C5 C1 U1 74.58(18) . . ? 
C2 C1 U1 75.07(18) . . ? 
C6 C1 U1 124.9(2) . . ? 
C1 C2 C3 107.8(3) . . ? 
C1 C2 C7 124.6(3) . . ? 
C3 C2 C7 127.3(3) . . ? 
C1 C2 U1 75.14(18) . . ? 
C3 C2 U1 74.94(17) . . ? 
C7 C2 U1 120.8(2) . . ? 
C4 C3 C2 107.6(3) . . ? 
C4 C3 C8 124.0(3) . . ? 
C2 C3 C8 127.6(3) . . ? 
C4 C3 U1 74.31(18) . . ? 
C2 C3 U1 75.22(18) . . ? 
C8 C3 U1 123.9(2) . . ? 
C5 C4 C3 108.2(3) . . ? 
C5 C4 C9 125.1(3) . . ? 
C3 C4 C9 125.9(3) . . ? 
C5 C4 U1 75.34(18) . . ? 
C3 C4 U1 75.74(18) . . ? 
C9 C4 U1 123.1(2) . . ? 
C1 C5 C4 108.1(3) . . ? 
C1 C5 C10 126.0(3) . . ? 
C4 C5 C10 125.5(3) . . ? 
C1 C5 U1 75.80(18) . . ? 
C4 C5 U1 74.76(18) . . ? 
C10 C5 U1 121.3(2) . . ? 
C15 C11 C12 108.0(3) . . ? 
C15 C11 C16 123.9(3) . . ? 
C12 C11 C16 127.0(3) . . ? 
C15 C11 U1 76.44(18) . . ? 
C12 C11 U1 73.43(17) . . ? 
C16 C11 U1 125.6(2) . . ? 
C11 C12 C13 108.2(3) . . ? 
C11 C12 C17 125.3(3) . . ? 
C13 C12 C17 125.9(3) . . ? 
C11 C12 U1 76.77(17) . . ? 
C13 C12 U1 75.80(17) . . ? 
C17 C12 U1 120.7(2) . . ? 
C14 C13 C12 107.5(3) . . ? 
C14 C13 C18 128.0(3) . . ? 
C12 C13 C18 124.1(3) . . ? 
C14 C13 U1 76.71(18) . . ? 
C12 C13 U1 74.05(17) . . ? 
C18 C13 U1 121.1(2) . . ? 
C13 C14 C15 108.1(3) . . ? 
C13 C14 C19 126.4(3) . . ? 
C15 C14 C19 124.8(3) . . ? 
C13 C14 U1 73.64(18) . . ? 
C15 C14 U1 75.66(18) . . ? 
C19 C14 U1 123.9(2) . . ? 
C11 C15 C14 108.2(3) . . ? 
C11 C15 C20 123.8(3) . . ? 
C14 C15 C20 126.8(3) . . ? 
C11 C15 U1 74.19(17) . . ? 
C14 C15 U1 74.92(18) . . ? 
C20 C15 U1 127.1(2) . . ? 
N1 C21 U1 175.8(3) . . ? 
N1 C22 C24 107.3(3) . . ? 
N1 C22 C23 107.3(3) . . ? 
C24 C22 C23 111.4(3) . . ? 
N1 C22 C25 106.8(3) . . ? 
C24 C22 C25 112.3(3) . . ? 
C23 C22 C25 111.5(3) . . ? 
N2 C26 P1 130.4(2) . . ? 
N2 C26 U1 68.80(17) . . ? 
P1 C26 U1 160.61(18) . . ? 
N2 C27 C29 108.1(3) . . ? 
N2 C27 C28 109.7(3) . . ? 
C29 C27 C28 108.8(3) . . ? 
N2 C27 C30 110.7(3) . . ? 
C29 C27 C30 109.4(3) . . ? 
C28 C27 C30 110.2(3) . . ? 
C32 C31 C36 116.6(3) . . ? 
C32 C31 P1 125.3(2) . . ? 
C36 C31 P1 118.1(2) . . ? 
C33 C32 C31 121.8(3) . . ? 
C32 C33 C34 120.4(3) . . ? 
C35 C34 C33 118.9(3) . . ? 
C34 C35 C36 120.5(3) . . ? 
C35 C36 C31 121.8(3) . . ? 
  
_refine_diff_density_max    0.995 
_refine_diff_density_min   -1.731 
_refine_diff_density_rms    0.099 
  
_shelx_res_file 
; 
TITL s1_a.res in P2(1)/c 
    s1_a.res 
    created by SHELXL-2017/1 at 14:52:06 on 24-Jan-2018 
REM Old TITL s1 in P2(1)/c 
  
REM SHELXT solution in P2(1)/c 
REM R1 0.061,  Rweak 0.006,  Alpha 0.130,  Orientation as input 
REM Formula found by SHELXT:  C34 N4 P U 
  
CELL  0.71073  10.0337  33.6762  10.7644   90.000  107.477   90.000 
ZERR    4.000   0.0004   0.0014   0.0004    0.000    0.001    0.000 
LATT  1 
SYMM -X, 1/2+Y, 1/2-Z 
SFAC C H N P U 
UNIT 144 212 8 4 4 
TEMP -173 
SIZE 0.01 0.04 0.11 
  
L.S. 16 
ACTA 
LIST 6 
FMAP 2 
PLAN 20 
OMIT 0 4 0 
OMIT 0 2 1 
  
WGHT    0.009800    6.549700 
FVAR       0.23573 
U1    5    0.630772    0.615326    0.340546    11.00000    0.01226    0.01036 = 
         0.01305    0.00164    0.00463    0.00071 
P1    4    0.252542    0.664074    0.158427    11.00000    0.01691    0.01875 = 
         0.01807   -0.00289    0.00230    0.00325 
N1    3    0.912844    0.665872    0.596793    11.00000    0.01694    0.01526 = 
         0.02060    0.00377    0.00792    0.00187 
N2    3    0.518746    0.674256    0.335396    11.00000    0.01831    0.01167 = 
         0.01414    0.00079    0.00609    0.00210 
C1    1    0.634470    0.587228    0.582918    11.00000    0.01875    0.01888 = 
         0.01690    0.00733    0.00653   -0.00229 
C2    1    0.700239    0.557042    0.529919    11.00000    0.01862    0.01543 = 
         0.01922    0.00910    0.00553    0.00335 
C3    1    0.596830    0.539484    0.423545    11.00000    0.02272    0.01275 = 
         0.01886    0.00682    0.00746   -0.00068 
C4    1    0.468412    0.559368    0.410869    11.00000    0.02286    0.01659 = 
         0.01817    0.00878    0.00456   -0.00511 
C5    1    0.492239    0.588702    0.509459    11.00000    0.01828    0.01728 = 
         0.02217    0.00726    0.00986   -0.00243 
C6    1    0.698054    0.608752    0.709620    11.00000    0.03045    0.02873 = 
         0.01917   -0.00029    0.00989   -0.00623 
AFIX 137 
H6A   2    0.667644    0.596132    0.778557    11.00000   -1.50000 
H6B   2    0.667719    0.636546    0.700366    11.00000   -1.50000 
H6C   2    0.800156    0.607580    0.732349    11.00000   -1.50000 
AFIX   0 
C7    1    0.849686    0.543956    0.587694    11.00000    0.02158    0.02702 = 
         0.02573    0.00932    0.00481    0.00605 
AFIX 137 
H7A   2    0.863503    0.534089    0.676324    11.00000   -1.50000 
H7B   2    0.912118    0.566523    0.590243    11.00000   -1.50000 
H7C   2    0.870659    0.522742    0.534099    11.00000   -1.50000 
AFIX   0 
C8    1    0.609899    0.502474    0.350115    11.00000    0.03534    0.01640 = 
         0.02543    0.00270    0.01277   -0.00317 
AFIX 137 
H8A   2    0.553939    0.481232    0.371818    11.00000   -1.50000 
H8B   2    0.708084    0.494281    0.374308    11.00000   -1.50000 
H8C   2    0.576196    0.507772    0.256324    11.00000   -1.50000 
AFIX   0 
C9    1    0.326900    0.546925    0.323713    11.00000    0.02615    0.02911 = 
         0.02715    0.01010    0.00261   -0.00853 
AFIX 137 
H9A   2    0.280558    0.530283    0.373031    11.00000   -1.50000 
H9B   2    0.338151    0.531834    0.249666    11.00000   -1.50000 
H9C   2    0.269978    0.570568    0.291773    11.00000   -1.50000 
AFIX   0 
C10   1    0.381415    0.613347    0.540074    11.00000    0.02137    0.02894 = 
         0.03210    0.00775    0.01514    0.00061 
AFIX 137 
H10A  2    0.321222    0.596167    0.573577    11.00000   -1.50000 
H10B  2    0.325089    0.626681    0.460742    11.00000   -1.50000 
H10C  2    0.425593    0.633281    0.605888    11.00000   -1.50000 
AFIX   0 
C11   1    0.877640    0.616536    0.274158    11.00000    0.01241    0.02140 = 
         0.01665    0.00087    0.00903    0.00253 
C12   1    0.793298    0.647690    0.203336    11.00000    0.01551    0.01620 = 
         0.01500    0.00260    0.01029   -0.00119 
C13   1    0.678597    0.630387    0.105820    11.00000    0.01721    0.01588 = 
         0.01440    0.00063    0.00876    0.00053 
C14   1    0.692672    0.588460    0.118333    11.00000    0.01602    0.01621 = 
         0.01718   -0.00109    0.00897   -0.00039 
C15   1    0.815309    0.580015    0.222471    11.00000    0.01784    0.01698 = 
         0.01742    0.00229    0.00968    0.00293 
C16   1    1.021492    0.620102    0.367884    11.00000    0.01581    0.02604 = 
         0.02251   -0.00209    0.00689    0.00052 
AFIX 137 
H16A  2    1.090622    0.613200    0.323639    11.00000   -1.50000 
H16B  2    1.030899    0.601988    0.441281    11.00000   -1.50000 
H16C  2    1.037129    0.647451    0.400091    11.00000   -1.50000 
AFIX   0 
C17   1    0.830538    0.691089    0.215895    11.00000    0.02457    0.01699 = 
         0.02454    0.00015    0.00942   -0.00243 
AFIX 137 
H17A  2    0.883141    0.697807    0.155392    11.00000   -1.50000 
H17B  2    0.887861    0.696734    0.305285    11.00000   -1.50000 
H17C  2    0.744870    0.706995    0.195190    11.00000   -1.50000 
AFIX   0 
C18   1    0.575483    0.653719    0.000477    11.00000    0.02310    0.01786 = 
         0.01803    0.00339    0.00531    0.00117 
AFIX 137 
H18A  2    0.624516    0.666866   -0.054328    11.00000   -1.50000 
H18B  2    0.530351    0.673760    0.040258    11.00000   -1.50000 
H18C  2    0.504498    0.635712   -0.053035    11.00000   -1.50000 
AFIX   0 
C19   1    0.606842    0.557844    0.025304    11.00000    0.02286    0.01720 = 
         0.02052   -0.00364    0.01165    0.00194 
AFIX 137 
H19A  2    0.668382    0.541818   -0.010205    11.00000   -1.50000 
H19B  2    0.537248    0.571302   -0.046015    11.00000   -1.50000 
H19C  2    0.559306    0.540582    0.071878    11.00000   -1.50000 
AFIX   0 
C20   1    0.886516    0.540480    0.254857    11.00000    0.02457    0.01739 = 
         0.02710    0.00160    0.01116    0.00620 
AFIX 137 
H20A  2    0.963033    0.538730    0.216025    11.00000   -1.50000 
H20B  2    0.818982    0.519204    0.220057    11.00000   -1.50000 
H20C  2    0.924003    0.537704    0.349626    11.00000   -1.50000 
AFIX   0 
C21   1    0.821663    0.651505    0.517720    11.00000    0.02002    0.01266 = 
         0.01957    0.00160    0.00807    0.00075 
C22   1    1.026526    0.685699    0.696194    11.00000    0.01922    0.02539 = 
         0.02262   -0.00596    0.00068   -0.00553 
C23   1    0.967538    0.699175    0.804291    11.00000    0.03328    0.03376 = 
         0.02793   -0.01141    0.00293    0.00407 
AFIX 137 
H23A  2    0.932300    0.676092    0.840163    11.00000   -1.50000 
H23B  2    0.891041    0.717991    0.768824    11.00000   -1.50000 
H23C  2    1.041354    0.712106    0.873379    11.00000   -1.50000 
AFIX   0 
C24   1    1.142895    0.655453    0.745780    11.00000    0.02471    0.05009 = 
         0.02956   -0.00542   -0.00284    0.01249 
AFIX 137 
H24A  2    1.105852    0.631877    0.777401    11.00000   -1.50000 
H24B  2    1.217673    0.667107    0.817104    11.00000   -1.50000 
H24C  2    1.180174    0.647880    0.674800    11.00000   -1.50000 
AFIX   0 
C25   1    1.072196    0.720977    0.629802    11.00000    0.03358    0.03362 = 
         0.04560   -0.00685    0.00684   -0.01339 
AFIX 137 
H25A  2    1.108999    0.711368    0.560644    11.00000   -1.50000 
H25B  2    1.145066    0.735868    0.694027    11.00000   -1.50000 
H25C  2    0.991849    0.738350    0.592101    11.00000   -1.50000 
AFIX   0 
C26   1    0.422631    0.652570    0.247961    11.00000    0.01694    0.01688 = 
         0.00960    0.00206    0.00713    0.00107 
C27   1    0.500675    0.716089    0.373922    11.00000    0.02322    0.01473 = 
         0.01624   -0.00113    0.00458    0.00531 
C28   1    0.474197    0.743235    0.255131    11.00000    0.02904    0.01354 = 
         0.02461    0.00154    0.00713    0.00449 
AFIX 137 
H28A  2    0.553954    0.741872    0.220521    11.00000   -1.50000 
H28B  2    0.462252    0.770623    0.280667    11.00000   -1.50000 
H28C  2    0.389412    0.734611    0.188060    11.00000   -1.50000 
AFIX   0 
C29   1    0.635685    0.728962    0.475115    11.00000    0.02574    0.01564 = 
         0.02768   -0.00681    0.00204    0.00277 
AFIX 137 
H29A  2    0.713441    0.726820    0.438023    11.00000   -1.50000 
H29B  2    0.653593    0.711790    0.551884    11.00000   -1.50000 
H29C  2    0.626827    0.756551    0.500498    11.00000   -1.50000 
AFIX   0 
C30   1    0.379595    0.719090    0.432517    11.00000    0.03031    0.02269 = 
         0.01863   -0.00357    0.00896    0.00644 
AFIX 137 
H30A  2    0.293431    0.709729    0.368872    11.00000   -1.50000 
H30B  2    0.367920    0.746800    0.455038    11.00000   -1.50000 
H30C  2    0.399935    0.702660    0.511145    11.00000   -1.50000 
AFIX   0 
C31   1    0.192603    0.617770    0.071556    11.00000    0.01854    0.02107 = 
         0.00780    0.00129    0.00160    0.00118 
C32   1    0.276920    0.590749    0.031543    11.00000    0.01552    0.02272 = 
         0.02241   -0.00265    0.00479    0.00048 
AFIX  43 
H32A  2    0.373635    0.596344    0.049215    11.00000   -1.20000 
AFIX   0 
C33   1    0.223619    0.556107   -0.033026    11.00000    0.02526    0.02560 = 
         0.02708   -0.00775    0.00924    0.00260 
AFIX  43 
H33A  2    0.283503    0.538455   -0.059901    11.00000   -1.20000 
AFIX   0 
C34   1    0.082726    0.546908   -0.058946    11.00000    0.02962    0.02457 = 
         0.02289   -0.00860    0.00336   -0.00417 
AFIX  43 
H34A  2    0.046454    0.522667   -0.100682    11.00000   -1.20000 
AFIX   0 
C35   1   -0.003340    0.573519   -0.023114    11.00000    0.01585    0.03565 = 
         0.02031   -0.00110    0.00271   -0.00691 
AFIX  43 
H35A  2   -0.100115    0.567843   -0.041819    11.00000   -1.20000 
AFIX   0 
C36   1    0.050214    0.608472    0.039960    11.00000    0.01785    0.02587 = 
         0.01557    0.00378    0.00303    0.00370 
AFIX  43 
H36A  2   -0.011225    0.626642    0.062425    11.00000   -1.20000 
  
AFIX   0 
HKLF 4 
  
  
  
  
REM  s1_a.res in P2(1)/c 
REM R1 =  0.0264 for    6047 Fo > 4sig(Fo)  and  0.0376 for all    7159 data 
REM    377 parameters refined using      0 restraints 
  
END 
  
WGHT      0.0071      6.7432 
  
REM Highest difference peak  0.995,  deepest hole -1.731,  1-sigma level  0.099 
Q1    1   0.7156  0.6143  0.4008  11.00000  0.05    0.99 
Q2    1   0.6339  0.5959  0.2887  11.00000  0.05    0.83 
Q3    1   1.1520  0.6160  0.7068  11.00000  0.05    0.71 
Q4    1   0.5577  0.5957  0.2962  11.00000  0.05    0.51 
Q5    1   0.1262  0.6265  0.0356  11.00000  0.05    0.44 
Q6    1   0.5087  0.6946  0.3549  11.00000  0.05    0.44 
Q7    1   0.2163  0.6399  0.1079  11.00000  0.05    0.42 
Q8    1   0.0462  0.6015 -0.0322  11.00000  0.05    0.40 
Q9    1   0.5037  0.6367  0.1832  11.00000  0.05    0.40 
Q10   1   0.6003  0.6643  0.3397  11.00000  0.05    0.39 
Q11   1   0.9592  0.6777  0.6550  11.00000  0.05    0.39 
Q12   1   0.6016  0.6122  0.2389  11.00000  0.05    0.39 
Q13   1   0.2196  0.5819 -0.0374  11.00000  0.05    0.38 
Q14   1   0.4788  0.6540  0.3645  11.00000  0.05    0.38 
Q15   1   0.4780  0.5778  0.4595  11.00000  0.05    0.38 
Q16   1   0.8190  0.6279  0.4331  11.00000  0.05    0.37 
Q17   1   0.5712  0.7159  0.4228  11.00000  0.05    0.37 
Q18   1   0.7854  0.6304  0.4849  11.00000  0.05    0.37 
Q19   1   0.4336  0.5878  0.5430  11.00000  0.05    0.37 
Q20   1   0.9571  0.5642  0.4643  11.00000  0.05    0.37 
; 
_shelx_res_checksum   58424 
  
_shelx_hkl_file 
; 
   2   0   0   13.50    6.00 
  -2   0   0   30.90    9.40 
   2   0   0   20.80    8.00 
  -2   0   0   27.50    6.20 
   2   0   0   -2.10    9.80 
  -2   0   0    4.10   10.30 
   3   0   0 3183.88   98.69 
  -3   0   0 3206.68   95.59 
   3   0   0 3256.87   95.69 
  -3   0   0 3286.27  100.09 
  -3   0   0 3359.96  100.59 
  -3   0   0 3153.88   98.69 
   3   0   0 3081.99  100.29 
   4   0   0 3480.35  114.19 
  -4   0   0 3687.03  112.89 
   4   0   0 3660.73  108.29 
  -4   0   0 3757.72  107.99 
   4   0   0 3614.24  111.99 
  -4   0   0 3642.84  114.09 
  -4   0   0 3405.56  117.79 
  -5   0   0  921.01   33.10 
  -5   0   0 1002.50   42.20 
  -5   0   0  897.81   41.00 
   5   0   0  901.11   33.80 
   5   0   0  929.81   38.40 
   5   0   0  847.62   43.60 
  -5   0   0  934.81   43.50 
   6   0   0  221.68   21.30 
  -6   0   0  222.28   28.00 
  -6   0   0  229.48   26.70 
  -6   0   0  274.07   27.90 
   6   0   0  200.98   24.30 
   7   0   0 1553.24   69.99 
   7   0   0 1598.64   62.19 
  -7   0   0 1728.73   67.39 
  -7   0   0 1623.44   67.19 
  -7   0   0 1650.63   55.39 
   7   0   0 1668.33   57.29 
  -7   0   0 1590.54   68.99 
   8   0   0 1972.50   75.99 
   8   0   0 2032.30   85.69 
  -8   0   0 2050.99   67.29 
   8   0   0 1886.71   68.59 
  -8   0   0 2103.29   81.39 
  -8   0   0 1923.51   79.69 
  -9   0   0  588.84   49.60 
   9   0   0  542.65   51.79 
   9   0   0  572.64   34.40 
  -9   0   0  493.75   29.00 
  -9   0   0  485.55   46.10 
  10   0   0   64.59   18.60 
 -10   0   0   26.40   14.90 
 -10   0   0   18.90   26.60 
 -10   0   0   58.49   30.70 
  10   0   0   72.09   41.50 
 -11   0   0  753.82   61.39 
  11   0   0  674.93   40.70 
  11   0   0  675.03   68.39 
 -11   0   0  743.63   61.39 
   1   1   0 1804.72   54.89 
   1   1   0 1674.83   53.79 
   2  -1   0 1956.20   61.59 
   2  -1   0 1976.30   65.19 
   2  -1   0 2065.99   63.79 
  -2  -1   0 2101.89   61.99 
  -2  -1   0 2083.99   64.99 
  -2  -1   0 2227.08   66.29 
  -2   1   0 2042.40   64.19 
   2   1   0 2082.69   64.69 
   2   1   0 2046.90   62.09 
   2   1   0 1943.21   65.29 
  -2   1   0 2107.39   61.69 
  -2   1   0 2144.49   65.39 
   3  -1   0  988.00   32.50 
   3  -1   0 1033.90   35.50 
  -3  -1   0  940.61   36.50 
  -3  -1   0 1008.00   32.70 
  -3  -1   0 1015.80   38.30 
  -3  -1   0  946.91   36.40 
   3  -1   0 1013.10   37.80 
  -3   1   0  943.91   37.60 
  -3   1   0  993.70   32.30 
  -3   1   0  985.60   36.00 
   3   1   0  952.00   32.60 
  -3   1   0 1016.30   38.20 
   3   1   0 1001.60   36.20 
   3   1   0  934.71   37.90 
   4  -1   0   10.40    9.40 
   4  -1   0    8.90   12.70 
   4  -1   0   19.30    7.20 
  -4  -1   0   35.20   12.80 
  -4  -1   0   21.20   10.10 
  -4  -1   0   24.90   11.90 
  -4  -1   0   26.10    7.50 
   4   1   0   23.40   13.50 
   4   1   0   26.20    7.40 
  -4   1   0   18.10   12.70 
  -4   1   0   26.20   12.40 
  -4   1   0   12.10   13.30 
   4   1   0   21.90   10.50 
  -4   1   0   22.80    6.80 
  -5  -1   0 2317.17   79.39 
   5  -1   0 2361.86   77.39 
  -5  -1   0 2349.86   79.49 
  -5  -1   0 2388.16   72.69 
   5  -1   0 2316.87   72.69 
   5  -1   0 2161.18   80.39 
  -5  -1   0 2402.76   81.89 
  -5   1   0 2429.56   81.49 
  -5   1   0 2231.88   78.49 
   5   1   0 2369.06   78.09 
   5   1   0 2196.38   81.49 
  -5   1   0 2367.16   72.29 
   5   1   0 2345.87   73.19 
  -5   1   0 2182.48   79.69 
  -6  -1   0  813.32   40.70 
  -6  -1   0  811.22   42.20 
   6  -1   0  787.12   43.60 
  -6  -1   0  779.02   33.80 
   6  -1   0  843.82   37.10 
  -6  -1   0  827.42   43.40 
  -6   1   0  788.02   41.20 
  -6   1   0  801.12   42.10 
  -6   1   0  768.32   31.70 
   6   1   0  793.72   44.60 
   6   1   0  830.42   33.70 
   6   1   0  877.21   38.00 
  -6   1   0  834.32   42.10 
   7  -1   0   51.29   23.10 
  -7  -1   0   76.79   19.70 
  -7  -1   0   52.69   19.40 
   7  -1   0   79.09   13.80 
  -7  -1   0   66.19   21.20 
  -7  -1   0   51.09   11.30 
   7  -1   0   74.39   15.10 
   7   1   0   46.60   14.90 
  -7   1   0   59.99   11.10 
  -7   1   0   76.99   20.50 
   7   1   0   64.29   14.00 
  -7   1   0   70.99   21.50 
   7   1   0   47.20   21.20 
  -7   1   0   85.39   22.50 
  -8  -1   0  119.79   14.90 
   8  -1   0  106.89   19.60 
  -8  -1   0  122.59   24.20 
   8  -1   0  134.39   17.90 
  -8  -1   0  109.79   26.50 
   8  -1   0  119.69   29.60 
   8   1   0  105.99   29.10 
   8   1   0  133.89   17.40 
  -8   1   0  128.79   26.70 
  -8   1   0  131.49   27.80 
   8   1   0   54.19   18.10 
  -8   1   0   90.29   14.10 
  -9  -1   0  198.48   22.00 
   9  -1   0  202.98   36.30 
  -9  -1   0  230.98   33.40 
   9  -1   0  185.08   20.50 
  -9  -1   0  229.38   32.70 
  -9   1   0  212.08   33.00 
  -9   1   0  176.88   17.50 
   9   1   0  193.98   21.70 
   9   1   0  188.18   35.90 
  -9   1   0  177.78   32.40 
 -10  -1   0  409.76   47.20 
 -10  -1   0  416.66   44.20 
  10  -1   0  341.27   48.70 
  10  -1   0  348.97   31.60 
 -10  -1   0  393.96   27.70 
 -10   1   0  361.76   27.20 
 -10   1   0  389.36   46.30 
  10   1   0  450.25   64.49 
 -10   1   0  369.16   41.00 
  10   1   0  390.36   32.50 
 -11  -1   0   93.79   34.30 
  11  -1   0  147.89   40.90 
 -11  -1   0  155.88   39.60 
  11  -1   0  139.69   21.00 
  11   1   0  103.59   22.40 
  11   1   0  144.79   43.70 
  -1  -2   0   64.89    6.40 
   1  -2   0   62.59    6.30 
  -1  -2   0   59.99    6.90 
   1  -2   0   60.79    4.90 
   1  -2   0   64.79    4.40 
   1   2   0   53.49    6.40 
   1   2   0   68.29    7.50 
   1   2   0   63.89    5.00 
  -1   2   0   57.59    4.50 
  -2  -2   0  298.37   14.00 
  -2  -2   0  302.87   19.40 
   2  -2   0  262.27   13.00 
  -2  -2   0  298.77   19.20 
   2  -2   0  291.67   15.40 
   2  -2   0  253.47   18.60 
   2   2   0  276.47   21.10 
   2   2   0  319.37   18.60 
   2   2   0  295.97   14.50 
  -2   2   0  267.87   13.00 
  -2   2   0  247.58   18.70 
  -2   2   0  293.87   16.70 
   3  -2   0  229.58   12.30 
  -3  -2   0  261.77   20.40 
   3  -2   0  211.88   18.10 
  -3  -2   0  221.78   16.40 
  -3  -2   0  252.67   18.40 
   3  -2   0  262.47   15.40 
  -3  -2   0  247.08   13.00 
   3   2   0  235.88   19.70 
  -3   2   0  238.78   16.70 
  -3   2   0  285.57   20.10 
  -3   2   0  232.18   12.40 
  -3   2   0  233.68   17.80 
   3   2   0  255.77   17.50 
   3   2   0  249.18   13.80 
   4  -2   0  292.47   24.00 
   4  -2   0  317.17   16.10 
  -4  -2   0  322.87   21.30 
  -4  -2   0  348.37   25.00 
  -4  -2   0  334.07   16.60 
  -4  -2   0  333.47   24.20 
  -4   2   0  295.87   23.40 
  -4   2   0  311.87   16.00 
   4   2   0  327.27   21.70 
   4   2   0  310.47   25.10 
  -4   2   0  288.67   22.80 
   4   2   0  333.57   17.30 
  -5  -2   0    1.40    7.60 
  -5  -2   0   19.70   12.90 
   5  -2   0    3.80    8.00 
   5  -2   0   -6.10    8.10 
  -5  -2   0    2.10   14.40 
   5  -2   0   13.00   15.80 
  -5  -2   0   20.40   15.90 
  -5   2   0   -3.70    7.10 
  -5   2   0    3.10   14.40 
   5   2   0  -13.60   14.10 
  -5   2   0   36.00   13.30 
   5   2   0    4.60    8.20 
   5   2   0   14.50   10.70 
  -5   2   0    4.00   13.70 
  -6  -2   0   17.40   15.10 
  -6  -2   0    5.60    8.20 
   6  -2   0   12.20    9.60 
   6  -2   0    4.20   15.50 
  -6  -2   0   -4.10   13.10 
   6  -2   0    2.30    7.80 
  -6  -2   0    2.30   18.00 
  -6   2   0   -7.60   14.50 
   6   2   0   15.80   12.10 
  -6   2   0  -11.10    8.20 
   6   2   0    2.70   10.50 
   6   2   0   -7.50   17.80 
  -6   2   0    8.50   14.70 
  -6   2   0   32.50   17.20 
  -7  -2   0    0.30   10.00 
   7  -2   0   -4.20   11.20 
  -7  -2   0   13.30   17.70 
  -7  -2   0  -10.80   17.90 
  -7  -2   0   42.00   20.90 
   7  -2   0   11.80   20.20 
   7  -2   0   -5.70   11.10 
  -7   2   0   -1.50    9.30 
  -7   2   0   19.60   19.30 
  -7   2   0   -0.10   18.50 
   7   2   0   -1.60   11.50 
  -7   2   0    2.80   16.90 
   7   2   0   -2.40   21.10 
   7   2   0  -12.70   12.00 
   8  -2   0   29.30   15.00 
  -8  -2   0   -7.20   21.10 
   8  -2   0    3.60   24.30 
  -8  -2   0   12.40   22.80 
  -8  -2   0  -10.80   10.30 
   8  -2   0   -9.30   12.40 
  -8   2   0  -17.20   21.20 
   8   2   0   -2.60   14.00 
  -8   2   0   -4.60   10.20 
   8   2   0   -3.80   24.40 
   8   2   0   -2.50   16.80 
  -8   2   0   27.40   23.50 
   9  -2   0   -6.60   15.10 
   9  -2   0  -26.80   25.80 
  -9  -2   0  -15.80   12.60 
  -9  -2   0  -22.20   25.60 
  -9  -2   0  -20.90   23.30 
  -9   2   0    4.50   12.20 
   9   2   0   24.20   15.50 
   9   2   0   -6.70   24.70 
  -9   2   0  -33.00   25.50 
  -9   2   0   18.70   25.80 
 -10  -2   0   40.10   27.40 
  10  -2   0   36.30   17.60 
 -10  -2   0   20.70   14.60 
  10  -2   0   22.30   36.30 
 -10  -2   0   37.40   28.40 
  10   2   0  -10.00   17.70 
 -10   2   0  -18.10   27.40 
 -10   2   0  -11.90   13.30 
 -10   2   0   39.50   30.40 
  11  -2   0    6.40   19.10 
  11  -2   0    6.50   36.20 
 -11  -2   0  -29.20   30.10 
 -11  -2   0    4.50   33.10 
 -11   2   0  -10.90   32.40 
  11   2   0    9.20   36.70 
  11   2   0    7.00   19.10 
 -11   2   0   32.10   59.39 
  -1  -3   0 3331.47   97.89 
   1  -3   0 3285.07   96.59 
   1  -3   0 3341.37   97.89 
  -1  -3   0 3456.45   98.09 
  -1  -3   0 3371.56   96.89 
   1  -3   0 3340.67   96.39 
  -1   3   0 3116.49   97.49 
   1   3   0 3385.06   97.89 
  -1   3   0 3165.38   96.49 
   1   3   0 3353.46   98.09 
   1   3   0 3322.57   96.89 
  -2  -3   0 3775.32  117.59 
   2  -3   0 3967.60  117.89 
  -2  -3   0 3849.81  115.29 
   2  -3   0 3933.31  114.59 
   2  -3   0 3755.82  115.79 
  -2  -3   0 4046.40  118.69 
   2   3   0 3955.60  118.69 
  -2   3   0 3870.61  116.19 
  -2   3   0 4154.68  118.09 
   2   3   0 3825.52  115.39 
  -2   3   0 3951.50  114.69 
   2   3   0 3988.50  117.69 
  -3  -3   0 1714.63   58.79 
  -3  -3   0 1721.93   56.99 
  -3  -3   0 1818.72   55.29 
   3  -3   0 1751.12   56.69 
   3  -3   0 1861.01   54.59 
  -3  -3   0 1891.41   60.69 
   3  -3   0 1718.93   59.09 
  -3   3   0 1822.32   60.89 
  -3   3   0 1728.63   57.29 
  -3   3   0 1766.72   58.79 
   3   3   0 1744.23   60.09 
   3   3   0 1742.03   55.19 
  -3   3   0 1766.22   54.19 
   3   3   0 1719.33   58.09 
  -4  -3   0   50.89    8.20 
   4  -3   0   36.50   13.80 
  -4  -3   0   55.09   11.20 
   4  -3   0   55.29    7.80 
  -4  -3   0   46.80   13.20 
  -4  -3   0   72.49   15.00 
   4  -3   0   32.80   10.20 
   4   3   0   39.00   15.60 
  -4   3   0   33.00   13.30 
   4   3   0   44.00   12.20 
  -4   3   0   58.09   13.20 
  -4   3   0   49.99    7.60 
   4   3   0   61.09    9.20 
  -5  -3   0 2605.04   85.19 
  -5  -3   0 2575.54   87.09 
   5  -3   0 2509.15   83.09 
  -5  -3   0 2603.64   79.89 
   5  -3   0 2553.44   79.19 
   5  -3   0 2497.05   87.89 
  -5  -3   0 2752.42   89.19 
  -5   3   0 2420.56   87.49 
  -5   3   0 2596.04   78.99 
  -5   3   0 2557.94   85.19 
   5   3   0 2565.34   85.39 
   5   3   0 2378.26   88.49 
   5   3   0 2513.85   80.09 
  -5   3   0 2651.63   87.69 
  -6  -3   0 1129.29   50.69 
   6  -3   0 1175.18   45.20 
  -6  -3   0 1130.99   48.10 
   6  -3   0 1123.19   40.50 
   6  -3   0 1034.50   51.29 
  -6  -3   0 1187.08   41.40 
  -6   3   0 1196.48   50.59 
   6   3   0 1152.78   42.90 
  -6   3   0 1113.89   49.10 
   6   3   0 1168.08   54.09 
  -6   3   0 1105.09   51.49 
   6   3   0 1201.88   48.50 
  -6   3   0 1148.39   40.30 
  -7  -3   0  434.26   34.90 
  -7  -3   0  362.96   36.10 
  -7  -3   0  391.76   35.90 
   7  -3   0  414.66   25.10 
   7  -3   0  368.06   37.40 
  -7  -3   0  399.76   23.30 
  -7   3   0  463.75   36.60 
  -7   3   0  378.96   22.20 
  -7   3   0  404.26   35.00 
   7   3   0  428.26   26.80 
   7   3   0  460.65   31.10 
  -7   3   0  359.16   37.10 
   7   3   0  424.96   39.90 
  -8  -3   0   31.90   21.70 
   8  -3   0   55.69   14.60 
   8  -3   0   42.40   15.50 
   8  -3   0   37.90   25.50 
  -8  -3   0   50.09   13.20 
  -8  -3   0   72.79   26.00 
   8   3   0   66.49   28.70 
   8   3   0   50.99   16.10 
  -8   3   0   27.00   23.20 
  -8   3   0   56.49   24.50 
  -8   3   0   57.69   12.30 
   8   3   0    0.40   15.50 
   9  -3   0  455.95   50.69 
  -9  -3   0  549.25   49.70 
   9  -3   0  547.95   31.90 
  -9  -3   0  447.06   27.90 
  -9  -3   0  443.16   42.80 
  -9   3   0  436.76   27.00 
   9   3   0  431.06   50.79 
  -9   3   0  459.55   46.60 
   9   3   0  446.36   33.60 
  -9   3   0  524.35   46.80 
  10  -3   0  568.54   58.89 
 -10  -3   0  503.35   55.59 
 -10  -3   0  618.04   48.40 
  10  -3   0  648.64   36.20 
 -10  -3   0  532.25   37.40 
 -10   3   0  598.54   53.79 
 -10   3   0  498.55   52.39 
  10   3   0  568.44   38.10 
 -10   3   0  564.54   31.10 
  11  -3   0  148.69   21.40 
 -11  -3   0  128.69   33.30 
 -11  -3   0  112.69   38.60 
  11  -3   0  133.89   42.50 
 -11   3   0  149.09   41.50 
 -11   3   0  140.19   36.40 
  11   3   0  124.69   24.30 
  11   3   0  236.38   45.90 
   0   4   0   -0.30    1.40 
  -1  -4   0 1109.29   36.20 
   1  -4   0 1129.89   34.50 
  -1  -4   0 1115.39   36.10 
   1  -4   0 1095.79   36.10 
  -1  -4   0 1073.39   34.90 
   1  -4   0 1134.49   34.60 
   1   4   0 1113.39   35.20 
   1   4   0 1083.59   36.30 
  -1   4   0 1089.69   34.40 
   1   4   0 1145.39   36.40 
  -1   4   0 1188.68   36.10 
  -1   4   0 1164.88   34.50 
  -2  -4   0  630.04   22.60 
   2  -4   0  605.14   22.80 
   2  -4   0  574.54   21.30 
  -2  -4   0  560.84   26.30 
   2  -4   0  611.64   25.50 
  -2  -4   0  620.94   26.90 
   2   4   0  591.54   26.10 
   2   4   0  601.34   22.90 
  -2   4   0  612.44   21.70 
   2   4   0  629.34   28.20 
  -2   4   0  593.24   25.40 
  -2   4   0  595.64   23.00 
  -3  -4   0 2532.15   74.89 
  -3  -4   0 2605.04   79.69 
   3  -4   0 2493.75   75.69 
  -3  -4   0 2430.66   75.79 
   3  -4   0 2511.65   73.69 
  -3  -4   0 2427.36   78.09 
   3  -4   0 2507.25   78.49 
  -3   4   0 2377.76   75.99 
   3   4   0 2458.35   79.59 
   3   4   0 2425.96   74.89 
  -3   4   0 2431.56   78.09 
  -3   4   0 2292.87   73.39 
   3   4   0 2401.76   77.59 
  -3   4   0 2344.77   79.39 
   4  -4   0 1988.10   72.39 
  -4  -4   0 2103.59   69.69 
  -4  -4   0 2047.40   72.29 
  -4  -4   0 2234.88   73.89 
  -4  -4   0 2250.67   67.49 
   4  -4   0 2110.69   69.69 
   4  -4   0 2147.69   66.19 
   4   4   0 2250.07   71.99 
   4   4   0 2151.38   67.39 
  -4   4   0 2160.08   66.09 
  -4   4   0 2245.28   72.59 
   4   4   0 2125.99   74.29 
  -4   4   0 2087.59   73.49 
  -4   4   0 1994.10   73.69 
  -5  -4   0  984.70   41.80 
   5  -4   0  904.61   44.10 
  -5  -4   0 1134.89   47.50 
   5  -4   0 1024.60   36.20 
   5  -4   0 1074.49   39.90 
  -5  -4   0 1054.39   45.40 
  -5  -4   0  914.11   39.90 
  -5   4   0 1015.50   43.10 
  -5   4   0 1024.30   35.70 
  -5   4   0 1018.50   44.20 
   5   4   0 1120.89   42.50 
   5   4   0  991.40   47.40 
  -5   4   0  979.30   46.20 
  -6  -4   0  177.68   16.70 
   6  -4   0  128.79   22.10 
   6  -4   0  203.18   19.30 
  -6  -4   0  166.38   26.70 
  -6  -4   0  140.49   21.10 
  -6  -4   0  151.18   19.70 
   6  -4   0  148.29   14.90 
   6   4   0  146.49   18.10 
  -6   4   0  156.38   15.50 
  -6   4   0  188.68   24.50 
   6   4   0  149.49   15.30 
   6   4   0  137.29   23.20 
  -6   4   0  197.88   25.40 
  -6   4   0  154.38   20.20 
  -7  -4   0 1180.48   42.50 
   7  -4   0 1099.99   42.00 
   7  -4   0 1055.19   54.99 
  -7  -4   0 1142.89   50.99 
  -7  -4   0 1117.99   55.99 
  -7  -4   0 1165.98   55.69 
   7   4   0  987.70   55.59 
   7   4   0 1138.79   50.79 
  -7   4   0 1069.09   40.60 
  -7   4   0 1113.79   53.29 
  -7   4   0 1089.99   52.49 
   7   4   0 1149.69   44.80 
  -7   4   0 1070.69   54.99 
  -8  -4   0 1179.88   45.40 
  -8  -4   0 1162.28   55.49 
   8  -4   0 1170.68   51.69 
  -8  -4   0 1208.28   61.99 
   8  -4   0 1157.88   61.09 
   8  -4   0 1190.58   46.30 
  -8   4   0 1152.48   43.90 
   8   4   0 1194.28   48.40 
  -8   4   0 1232.18   61.99 
   8   4   0 1140.69   62.79 
  -8   4   0 1197.38   57.69 
  -9  -4   0  255.37   34.60 
   9  -4   0  212.88   25.60 
  -9  -4   0  193.58   28.60 
  -9  -4   0  154.78   17.80 
   9  -4   0  180.18   32.70 
  -9   4   0  217.08   32.10 
   9   4   0  223.88   23.70 
   9   4   0  186.48   33.50 
  -9   4   0  214.98   21.30 
  -9   4   0  237.98   37.30 
 -10  -4   0  110.29   28.20 
  10  -4   0  132.89   20.30 
 -10  -4   0  126.89   19.70 
 -10  -4   0  150.78   35.60 
  10  -4   0   97.69   36.00 
  10   4   0  122.99   21.80 
 -10   4   0   79.29   31.10 
 -10   4   0   95.29   16.50 
 -10   4   0  124.79   32.90 
  10   4   0   97.09   41.50 
 -11  -4   0  666.63   56.89 
  11  -4   0  641.04   38.70 
  11  -4   0  610.84   65.89 
 -11  -4   0  685.93   69.69 
 -11   4   0  725.73   62.59 
  11   4   0  745.83   69.19 
  11   4   0  649.54   45.00 
 -11   4   0  685.33   61.39 
   0  -5   0    3.90    3.80 
   0   5   0    7.30    3.70 
   0   5   0   -0.10    3.40 
   0   5   0   -2.60    3.20 
  -1  -5   0  229.58   13.50 
   1  -5   0  221.98   11.40 
  -1  -5   0  203.78   13.80 
   1  -5   0  212.48   13.20 
  -1  -5   0  224.88   11.90 
  -1   5   0  207.98   10.30 
   1   5   0  249.68   14.80 
   1   5   0  198.78   12.80 
   1   5   0  216.88   12.50 
  -1   5   0  226.58   12.60 
  -1   5   0  245.38   11.00 
  -1   5   0  215.48   10.70 
   2  -5   0  778.52   30.90 
   2  -5   0  840.42   28.20 
  -2  -5   0  851.81   27.00 
  -2  -5   0  837.92   31.60 
   2  -5   0  821.42   27.50 
  -2  -5   0  769.02   31.30 
  -2  -5   0  816.72   28.60 
  -2   5   0  857.91   31.10 
  -2   5   0  799.22   28.30 
  -2   5   0  821.12   27.50 
   2   5   0  833.62   31.50 
   2   5   0  797.52   32.80 
   2   5   0  774.92   28.50 
   3  -5   0  369.16   17.10 
   3  -5   0  325.67   19.80 
  -3  -5   0  376.96   17.00 
   3  -5   0  361.06   15.50 
  -3  -5   0  357.86   17.00 
  -3  -5   0  353.66   22.40 
  -3  -5   0  307.17   25.10 
  -3   5   0  372.96   18.40 
   3   5   0  356.76   17.50 
   3   5   0  345.07   20.70 
  -3   5   0  349.77   15.60 
  -3   5   0  355.26   21.20 
   4  -5   0   38.10    7.40 
  -4  -5   0   23.90   13.60 
  -4  -5   0   37.50    8.60 
   4  -5   0   22.80   12.50 
   4  -5   0   45.90    9.40 
  -4  -5   0   33.40   15.00 
  -4  -5   0   38.20   10.10 
  -4   5   0   36.10   16.00 
   4   5   0   33.40    8.80 
   4   5   0   12.70   15.20 
   4   5   0   32.00   12.20 
  -4   5   0   27.20    7.40 
  -4   5   0   26.10   11.40 
  -4   5   0   45.80   11.40 
  -5  -5   0  255.87   26.60 
  -5  -5   0  274.67   22.30 
   5  -5   0  257.97   16.10 
  -5  -5   0  256.97   17.30 
   5  -5   0  281.47   19.00 
  -5  -5   0  271.67   28.20 
   5  -5   0  268.17   25.90 
   5   5   0  309.67   25.10 
   5   5   0  262.57   20.00 
  -5   5   0  253.37   23.20 
   5   5   0  211.58   28.20 
  -5   5   0  273.77   16.20 
  -5   5   0  270.47   25.00 
  -5   5   0  270.67   27.90 
   6  -5   0  374.26   22.80 
  -6  -5   0  327.77   20.40 
  -6  -5   0  324.47   30.80 
  -6  -5   0  312.47   32.00 
   6  -5   0  348.87   31.20 
  -6  -5   0  356.66   26.90 
   6  -5   0  352.66   19.70 
  -6   5   0  395.26   30.30 
  -6   5   0  361.46   30.30 
   6   5   0  388.46   26.60 
   6   5   0  356.06   34.20 
  -6   5   0  363.56   33.70 
   6   5   0  341.07   23.10 
  -6   5   0  319.27   19.10 
  -7  -5   0    3.90   19.00 
  -7  -5   0    0.20   16.20 
   7  -5   0   12.20   10.60 
   7  -5   0   -1.20   19.00 
  -7  -5   0    9.90    9.50 
   7  -5   0    1.70   12.20 
  -7  -5   0  -15.70   17.50 
  -7   5   0   30.00   20.50 
  -7   5   0   -2.50   18.60 
   7   5   0   -4.80   13.80 
   7   5   0  -29.50   11.70 
   7   5   0  -30.10   18.40 
  -7   5   0    9.10    9.60 
  -7   5   0   40.60   21.10 
  -8  -5   0  324.67   36.20 
   8  -5   0  350.06   28.70 
  -8  -5   0  355.56   24.70 
   8  -5   0  391.66   26.80 
   8  -5   0  371.36   43.30 
  -8  -5   0  395.16   42.20 
  -8   5   0  370.76   42.70 
  -8   5   0  351.46   37.90 
   8   5   0  421.16   29.90 
  -8   5   0  348.67   23.70 
   8   5   0  358.46   44.40 
  -9  -5   0   74.39   28.90 
   9  -5   0   64.29   15.80 
  -9  -5   0   85.59   15.70 
  -9  -5   0   80.39   25.90 
   9  -5   0   69.49   29.30 
  -9   5   0   39.10   28.90 
  -9   5   0   62.49   14.60 
  -9   5   0   77.89   27.20 
   9   5   0   59.69   29.70 
   9   5   0   88.99   20.00 
 -10  -5   0  303.27   26.80 
  10  -5   0  312.07   49.50 
  10  -5   0  221.18   28.00 
 -10  -5   0  306.37   39.10 
 -10  -5   0  283.07   34.60 
 -10   5   0  280.57   36.60 
  10   5   0  315.47   27.50 
 -10   5   0  259.67   42.10 
 -10   5   0  201.38   24.10 
  10   5   0  222.48   40.20 
  11  -5   0  101.29   20.00 
  11  -5   0  -10.50   33.60 
 -11  -5   0   98.79   37.20 
 -11  -5   0   44.80   29.90 
  11   5   0   67.69   41.00 
  11   5   0   43.70   23.30 
 -11   5   0   79.39   33.70 
 -11   5   0   30.90   32.10 
   0  -6   0 1222.38   38.70 
   0  -6   0 1251.57   38.20 
   0  -6   0 1257.27   39.20 
   0   6   0 1155.48   39.00 
   0   6   0 1189.58   38.30 
   0   6   0 1128.69   37.90 
   0   6   0 1276.37   37.70 
   1  -6   0  986.70   32.50 
  -1  -6   0 1008.50   34.30 
  -1  -6   0  943.81   33.70 
   1  -6   0  941.91   33.90 
   1   6   0  958.30   33.20 
  -1   6   0  972.50   32.40 
  -1   6   0 1030.80   34.20 
   1   6   0 1006.80   34.40 
   1   6   0  989.50   34.80 
  -1   6   0 1027.90   31.90 
   2  -6   0   18.10    5.70 
   2  -6   0   14.90    8.40 
  -2  -6   0    2.00    9.20 
   2  -6   0   18.70    5.90 
  -2  -6   0   12.40    6.00 
  -2  -6   0   11.90    8.50 
  -2  -6   0    9.70    4.40 
  -2   6   0    5.00    7.70 
   2   6   0    5.00    8.40 
  -2   6   0   12.70    5.50 
   2   6   0   15.20    6.40 
   2   6   0   27.80   11.20 
  -2   6   0   11.70    5.90 
  -3  -6   0 1333.37   41.20 
  -3  -6   0 1336.77   42.20 
  -3  -6   0 1235.98   49.20 
  -3  -6   0 1222.78   49.70 
   3  -6   0 1098.79   44.10 
   3  -6   0 1267.07   40.50 
   3  -6   0 1249.97   41.70 
   3   6   0 1142.49   47.70 
   3   6   0 1226.28   42.00 
  -3   6   0 1282.77   40.50 
   3   6   0 1288.57   47.70 
  -3   6   0 1176.58   48.10 
  -3   6   0 1246.28   42.20 
  -3   6   0 1414.36   45.40 
  -4  -6   0  462.35   28.80 
   4  -6   0  435.26   27.20 
  -4  -6   0  457.75   29.10 
   4  -6   0  472.25   22.70 
  -4  -6   0  485.35   21.60 
   4  -6   0  453.35   20.00 
  -4  -6   0  437.86   22.20 
  -4   6   0  435.56   23.90 
  -4   6   0  449.56   20.00 
   4   6   0  454.85   22.60 
   4   6   0  399.16   30.30 
  -4   6   0  449.76   27.20 
  -4   6   0  423.96   29.00 
   4   6   0  501.35   27.60 
  -5  -6   0   13.90    7.80 
   5  -6   0   39.00    9.60 
   5  -6   0   11.10   13.90 
  -5  -6   0   29.20   16.10 
   5  -6   0   21.20    7.50 
  -5  -6   0    5.90   15.20 
   5   6   0   25.30   10.80 
   5   6   0   20.70   13.40 
   5   6   0    6.20   15.70 
  -5   6   0    6.10   12.50 
  -5   6   0    5.20   13.00 
  -5   6   0    9.70    7.30 
  -5   6   0   30.30   16.20 
  -6  -6   0  285.77   19.90 
   6  -6   0  278.07   20.90 
  -6  -6   0  300.17   32.20 
   6  -6   0  334.77   21.40 
   6  -6   0  259.87   30.40 
  -6  -6   0  279.57   24.60 
  -6  -6   0  284.67   28.70 
   6   6   0  299.67   33.70 
  -6   6   0  274.47   18.40 
   6   6   0  308.87   22.70 
  -6   6   0  392.96   49.40 
  -6   6   0  317.77   28.50 
  -6   6   0  311.27   33.20 
  -7  -6   0  285.77   29.90 
  -7  -6   0  261.77   36.20 
   7  -6   0  342.67   25.10 
  -7  -6   0  336.87   35.70 
   7  -6   0  275.77   35.80 
   7  -6   0  273.07   22.00 
  -7  -6   0  320.77   21.80 
   7   6   0  350.76   29.20 
   7   6   0  334.07   25.50 
  -7   6   0  379.06   34.80 
  -7   6   0  286.87   36.90 
  -7   6   0  308.27   34.00 
  -7   6   0  323.37   21.10 
   7   6   0  239.78   31.00 
   8  -6   0  175.18   31.50 
  -8  -6   0  176.38   17.60 
   8  -6   0  162.08   17.90 
   8  -6   0  173.88   20.50 
  -8  -6   0  146.59   24.70 
  -8  -6   0  212.18   32.20 
   8   6   0  191.68   21.00 
  -8   6   0  126.19   28.20 
   8   6   0  156.28   33.00 
  -8   6   0  192.98   28.10 
  -8   6   0  148.39   16.00 
   9  -6   0   16.80   29.70 
  -9  -6   0   61.99   15.10 
  -9  -6   0   87.59   23.60 
  -9  -6   0   71.19   30.30 
   9  -6   0   46.80   15.00 
   9   6   0   36.00   18.00 
  -9   6   0   16.60   13.90 
  -9   6   0   59.39   26.10 
  -9   6   0   58.69   27.40 
   9   6   0   88.69   30.70 
  10  -6   0   35.60   15.50 
 -10  -6   0   34.00   14.90 
 -10  -6   0   15.20   33.00 
 -10  -6   0   25.50   26.50 
  10  -6   0   -3.50   36.70 
 -10   6   0   17.20   26.90 
 -10   6   0  -10.70   29.70 
 -10   6   0  -10.70   13.20 
  10   6   0   15.80   30.90 
  10   6   0   47.70   19.60 
 -11  -6   0  157.28   37.30 
  11  -6   0  121.29   21.10 
 -11  -6   0  145.49   34.30 
  11  -6   0  118.09   38.90 
 -11   6   0  188.18   41.20 
  11   6   0  191.08   43.50 
 -11   6   0  139.79   36.40 
  11   6   0  182.78   27.50 
   0  -7   0    7.80    6.70 
   0  -7   0   -3.60    6.20 
   0  -7   0   -1.20    6.60 
   0   7   0    6.40    6.30 
   0   7   0    3.20    7.30 
   0   7   0    4.40    6.00 
   0   7   0   -1.30    6.20 
   1  -7   0 2294.87   71.89 
   1  -7   0 2305.97   70.49 
  -1  -7   0 2433.76   72.29 
   1  -7   0 2222.88   69.79 
  -1  -7   0 2150.98   71.39 
  -1   7   0 2309.87   70.19 
   1   7   0 2379.46   71.29 
  -1   7   0 2358.86   71.89 
   1   7   0 2297.47   72.39 
  -1   7   0 2226.88   69.69 
  -1   7   0 2455.15   72.89 
   1   7   0 2372.56   71.69 
   2  -7   0 5688.13  166.88 
  -2  -7   0 5668.53  165.08 
   2  -7   0 5398.16  163.88 
   2  -7   0 5570.24  164.18 
  -2  -7   0 5805.82  167.28 
  -2  -7   0 5593.54  166.98 
  -2  -7   0 5713.53  161.58 
  -2   7   0 5809.72  166.88 
   2   7   0 5638.94  167.58 
  -2   7   0 5339.67  164.18 
  -2   7   0 5565.94  168.28 
   2   7   0 5467.95  165.08 
   2   7   0 5541.65  166.78 
  -2   7   0 5704.13  164.08 
  -3  -7   0  105.39   11.80 
   3  -7   0   98.89   10.30 
   3  -7   0   99.89   10.10 
  -3  -7   0   91.79   13.90 
  -3  -7   0   92.89    9.70 
  -3  -7   0  115.69   14.50 
   3   7   0  116.19   13.30 
  -3   7   0  113.89   13.50 
  -3   7   0   81.59   10.00 
   3   7   0  108.59   11.20 
  -3   7   0   92.39   11.60 
  -3   7   0   91.59   15.10 
   3   7   0   86.49   14.70 
  -4  -7   0  384.26   19.90 
   4  -7   0  324.37   25.90 
  -4  -7   0  381.36   27.40 
  -4  -7   0  420.86   28.00 
   4  -7   0  409.16   20.20 
   4  -7   0  391.36   18.70 
  -4   7   0  404.56   25.90 
  -4   7   0  351.06   24.60 
   4   7   0  397.96   26.60 
  -4   7   0  391.56   18.80 
   4   7   0  365.86   24.80 
   4   7   0  420.46   31.10 
  -4   7   0  399.26   29.60 
  -5  -7   0 1819.72   59.79 
   5  -7   0 1797.72   56.79 
   5  -7   0 1664.33   65.19 
  -5  -7   0 1744.13   58.19 
   5  -7   0 1800.12   59.79 
  -5  -7   0 1776.12   66.29 
  -5  -7   0 1760.52   66.49 
   5   7   0 1801.42   59.59 
  -5   7   0 1612.24   63.59 
   5   7   0 1635.84   66.79 
   5   7   0 1864.51   65.09 
  -5   7   0 1796.02   62.19 
  -5   7   0 1701.93   68.09 
  -5   7   0 1726.63   56.59 
  -6  -7   0 1585.14   58.79 
  -6  -7   0 1678.33   65.29 
   6  -7   0 1677.73   57.69 
   6  -7   0 1507.65   64.09 
  -6  -7   0 1697.43   55.99 
  -6  -7   0 1577.04   64.79 
   6   7   0 1612.74   56.99 
   6   7   0 1515.85   66.69 
  -6   7   0 1566.24   66.49 
   6   7   0 1691.93   63.09 
  -6   7   0 1568.64   61.29 
  -7  -7   0  585.94   36.50 
   7  -7   0  661.63   43.50 
  -7  -7   0  522.75   41.30 
   7  -7   0  597.44   31.60 
  -7  -7   0  614.94   43.20 
  -7  -7   0  673.23   30.70 
   7  -7   0  592.84   29.40 
  -7   7   0  580.74   39.20 
  -7   7   0  656.13   28.50 
   7   7   0  596.54   32.80 
   7   7   0  564.34   36.70 
   7   7   0  599.64   46.50 
  -7   7   0  589.74   40.70 
  -7   7   0  639.24   45.20 
   8  -7   0  203.88   22.50 
  -8  -7   0  203.28   22.10 
   8  -7   0  187.18   29.20 
  -8  -7   0  195.18   30.80 
  -8  -7   0  188.48   24.30 
   8  -7   0  246.68   23.40 
  -8   7   0  181.68   20.00 
   8   7   0  173.68   32.00 
  -8   7   0  216.78   29.10 
   8   7   0  225.28   26.90 
  -8   7   0  181.68   29.60 
  -9  -7   0 1156.78   48.70 
   9  -7   0  977.00   63.89 
  -9  -7   0 1085.89   54.79 
  -9  -7   0 1019.50   63.99 
   9  -7   0 1073.19   43.90 
   9   7   0 1052.39   48.60 
   9   7   0 1046.90   65.69 
  -9   7   0 1071.99   63.49 
  -9   7   0 1016.50   42.60 
  -9   7   0 1109.29   59.99 
  10  -7   0  544.45   32.70 
 -10  -7   0  490.95   56.49 
 -10  -7   0  484.85   44.40 
 -10  -7   0  474.35   32.40 
  10  -7   0  529.25   84.19 
 -10   7   0  476.65   48.50 
  10   7   0  504.95   56.89 
 -10   7   0  454.65   54.89 
  10   7   0  541.15   38.80 
 -10   7   0  533.65   29.80 
  11  -7   0   23.90   18.20 
 -11  -7   0  -28.50   34.40 
 -11  -7   0   76.09   32.00 
  11  -7   0   71.89   38.40 
 -11   7   0  -47.20   33.00 
  11   7   0  -27.20   34.30 
  11   7   0   20.30   22.40 
 -11   7   0   26.50   32.80 
   0  -8   0 1837.52   58.99 
   0  -8   0 1822.62   58.39 
   0   8   0 1861.71   58.29 
   0   8   0 1934.11   58.79 
   0   8   0 1915.81   57.59 
   0   8   0 1917.41   59.89 
   1  -8   0 2552.94   78.19 
   1  -8   0 2488.95   78.59 
  -1  -8   0 2582.34   80.19 
   1  -8   0 2607.14   80.09 
  -1  -8   0 2445.06   79.59 
   1   8   0 2533.15   74.79 
  -1   8   0 2717.13   78.19 
   1   8   0 2503.05   79.19 
   1   8   0 2637.44   80.89 
  -1   8   0 2636.34   78.79 
  -1   8   0 2625.04   80.69 
   1   8   0 2609.34   79.89 
   1   8   0 2647.04   79.49 
  -1   8   0 2748.93   80.39 
  -2  -8   0   43.60    9.80 
   2  -8   0   37.90    7.00 
   2  -8   0   38.10    9.00 
  -2  -8   0   36.30    9.80 
  -2  -8   0   42.60    3.90 
  -2  -8   0   34.10    7.00 
  -2   8   0   38.70   11.20 
   2   8   0   44.70   10.80 
   2   8   0   32.00    8.50 
   2   8   0   48.10    8.20 
  -2   8   0   33.30    8.00 
  -2   8   0   41.30    6.70 
  -2   8   0   43.80    6.80 
   3  -8   0 2444.86   73.59 
  -3  -8   0 2424.76   71.09 
   3  -8   0 2347.17   72.69 
  -3  -8   0 2411.56   74.19 
  -3  -8   0 2186.08   76.59 
  -3  -8   0 2526.65   78.49 
   3  -8   0 2188.78   77.59 
  -3   8   0 2291.37   73.59 
   3   8   0 2353.16   78.59 
   3   8   0 2280.97   74.09 
  -3   8   0 2332.97   72.49 
  -3   8   0 2316.87   79.29 
   3   8   0 2413.86   77.09 
  -3   8   0 2543.25   81.59 
  -4  -8   0 3723.83  120.89 
  -4  -8   0 4122.89  122.29 
   4  -8   0 3704.93  119.99 
   4  -8   0 3857.21  114.29 
  -4  -8   0 3935.21  116.39 
   4  -8   0 3344.07  118.29 
  -4  -8   0 3838.52  114.59 
   4   8   0 3647.93  122.19 
  -4   8   0 3627.94  122.39 
  -4   8   0 3903.21  114.49 
  -4   8   0 3934.81  120.09 
   4   8   0 3691.13  116.19 
   4   8   0 4015.10  120.79 
   5  -8   0  998.40   37.60 
  -5  -8   0  949.11   36.90 
   5  -8   0  964.70   35.00 
  -5  -8   0 1012.40   46.00 
   5  -8   0  973.50   44.10 
  -5  -8   0  931.81   44.70 
  -5  -8   0 1016.90   36.80 
  -5   8   0 1041.50   43.50 
   5   8   0  890.31   46.30 
  -5   8   0  894.41   45.30 
   5   8   0  963.50   38.30 
  -5   8   0  992.80   41.20 
  -5   8   0  969.60   35.20 
   5   8   0  957.50   42.80 
  -6  -8   0   77.59   19.60 
  -6  -8   0  120.69   14.50 
  -6  -8   0   93.69   16.10 
   6  -8   0  123.59   13.50 
   6  -8   0  124.69   22.10 
   6  -8   0  136.79   17.10 
  -6  -8   0   67.99   19.10 
  -6   8   0  106.79   22.90 
  -6   8   0  135.99   15.80 
   6   8   0  139.09   25.40 
   6   8   0  149.49   16.60 
   6   8   0  132.79   19.50 
  -6   8   0   93.29   21.40 
  -6   8   0  129.79   19.30 
  -7  -8   0 1151.68   45.20 
   7  -8   0 1169.88   57.59 
  -7  -8   0 1137.99   57.29 
   7  -8   0 1342.87   48.60 
   7  -8   0 1230.88   44.30 
  -7  -8   0 1055.29   56.19 
  -7  -8   0 1124.99   49.70 
  -7   8   0 1176.68   53.39 
   7   8   0 1175.98   47.40 
  -7   8   0 1087.29   59.69 
  -7   8   0 1136.79   54.79 
  -7   8   0 1178.58   43.00 
   7   8   0 1100.59   52.69 
   7   8   0 1188.28   60.69 
  -8  -8   0  967.60   40.90 
  -8  -8   0  935.51   47.10 
   8  -8   0  942.71   56.79 
   8  -8   0  989.00   44.30 
  -8  -8   0  945.71   56.99 
   8  -8   0  975.80   39.80 
   8   8   0  931.81   43.70 
  -8   8   0  979.60   38.50 
  -8   8   0  930.81   51.39 
  -8   8   0  908.51   56.79 
   8   8   0  860.91   55.79 
  -9  -8   0  207.48   28.10 
  -9  -8   0  178.38   19.60 
  -9  -8   0  149.29   31.80 
   9  -8   0  193.88   24.00 
   9  -8   0  242.18   37.90 
   9   8   0  148.09   21.70 
  -9   8   0  154.68   18.60 
   9   8   0  177.98   38.00 
  -9   8   0  175.98   33.90 
  -9   8   0  139.99   28.80 
 -10  -8   0  114.79   28.90 
  10  -8   0   99.99   17.80 
 -10  -8   0   96.19   39.20 
 -10  -8   0   59.09   17.70 
  10   8   0  100.89   22.70 
  10   8   0  106.59   37.40 
 -10   8   0  102.69   30.30 
 -10   8   0   73.09   16.00 
  11  -8   0  495.95   33.90 
 -11  -8   0  529.25   52.39 
  11  -8   0  550.14   65.29 
 -11  -8   0  467.05   59.69 
  11   8   0  457.95   43.40 
 -11   8   0  522.65   60.19 
  11   8   0  560.24   66.59 
 -11   8   0  442.76   51.89 
   0  -9   0   12.30    7.40 
   0  -9   0   -2.00    6.10 
   0   9   0   -2.00    6.00 
   0   9   0   13.90    7.60 
   0   9   0    1.30    6.40 
   0   9   0    2.90    6.00 
   1  -9   0   95.39   10.70 
  -1  -9   0   89.49   10.80 
  -1  -9   0   61.69    9.20 
   1  -9   0   71.69    8.50 
   1  -9   0   76.89    9.80 
  -1   9   0   84.29   10.80 
   1   9   0   87.19   11.10 
   1   9   0   80.09    5.40 
   1   9   0   88.29    9.60 
   1   9   0   54.59    8.70 
   1   9   0   63.69    8.50 
  -1   9   0   84.39    8.70 
  -1   9   0   67.79    7.40 
  -1   9   0   81.99    9.70 
   2  -9   0  207.58   16.20 
  -2  -9   0  238.98   17.00 
  -2  -9   0  246.48   16.90 
   2  -9   0  252.47   13.80 
   2   9   0  231.88   18.90 
  -2   9   0  224.38   13.30 
  -2   9   0  265.57   16.50 
  -2   9   0  233.08   12.90 
  -2   9   0  239.78   13.30 
   2   9   0  233.08   17.00 
   2   9   0  230.08   15.00 
  -2   9   0  214.08   17.50 
   3  -9   0   74.79    8.80 
  -3  -9   0   71.19   15.10 
  -3  -9   0   53.39   12.30 
  -3  -9   0   87.79   13.60 
   3  -9   0   72.39   12.50 
   3  -9   0   76.39    9.10 
  -3  -9   0   86.09    8.30 
  -3   9   0   81.49   16.00 
   3   9   0   75.09   11.80 
   3   9   0   95.69   12.00 
  -3   9   0   80.99    9.00 
  -3   9   0   77.49   12.70 
  -3   9   0   80.49   10.00 
   3   9   0   68.29   15.00 
  -4  -9   0    4.80    7.90 
  -4  -9   0   -4.30   12.70 
   4  -9   0   -2.70   12.80 
  -4  -9   0   -3.10    6.70 
   4  -9   0   -6.10    6.90 
  -4  -9   0  -17.20   12.20 
   4   9   0   16.90    9.90 
   4   9   0   10.30   16.40 
  -4   9   0  -10.20    6.50 
  -4   9   0   -2.60   10.10 
   4   9   0    3.70   11.10 
  -4   9   0   -0.70   13.90 
   5  -9   0  125.69   19.30 
  -5  -9   0  109.79   19.20 
  -5  -9   0   96.19   12.00 
  -5  -9   0  115.39   19.40 
   5  -9   0  107.49   13.40 
   5  -9   0  107.09   13.20 
  -5  -9   0  103.19   12.60 
   5   9   0  158.38   19.20 
   5   9   0  111.89   14.80 
  -5   9   0  112.39   16.70 
   5   9   0  102.29   22.00 
  -5   9   0  108.39   11.60 
  -5   9   0  108.79   15.30 
  -5   9   0  109.09   21.40 
  -6  -9   0  138.29   16.60 
  -6  -9   0   97.09   15.80 
  -6  -9   0  111.79   23.30 
   6  -9   0  113.29   20.30 
   6  -9   0   75.09   12.70 
   6  -9   0   84.09   12.10 
  -6  -9   0  102.59   20.80 
  -6   9   0  127.69   19.80 
  -6   9   0  120.19   19.60 
   6   9   0  104.49   23.80 
   6   9   0   91.59   15.50 
  -6   9   0  116.89   24.50 
   6   9   0  130.79   20.80 
  -6   9   0  101.39   12.00 
   7  -9   0  114.69   24.50 
   7  -9   0   98.99   13.80 
  -7  -9   0   85.69   13.60 
  -7  -9   0   92.79   17.50 
  -7  -9   0   69.39   23.70 
   7  -9   0  107.69   15.80 
  -7  -9   0   91.89   24.10 
   7   9   0  102.99   27.60 
  -7   9   0  131.39   20.90 
  -7   9   0   98.89   26.30 
   7   9   0   81.49   17.50 
  -7   9   0  103.19   13.70 
  -7   9   0  112.69   22.50 
   7   9   0   90.09   18.20 
  -8  -9   0   -5.60   23.30 
  -8  -9   0    8.70   15.00 
  -8  -9   0   20.20   18.40 
   8  -9   0   29.70   12.10 
   8  -9   0   10.70   13.20 
   8  -9   0    8.50   24.60 
  -8   9   0    2.10   24.80 
  -8   9   0   12.70   11.80 
  -8   9   0   33.10   23.00 
   8   9   0   -2.20   15.10 
   8   9   0    0.40   26.50 
  -9  -9   0   71.09   30.70 
   9  -9   0   69.99   30.20 
   9  -9   0   33.30   15.40 
  -9  -9   0   29.30   20.70 
  -9  -9   0   61.89   16.30 
   9   9   0   29.00   32.50 
  -9   9   0   60.99   27.30 
  -9   9   0   20.30   26.90 
  -9   9   0   29.70   14.20 
   9   9   0   62.59   19.20 
 -10  -9   0    8.10   45.80 
 -10  -9   0   52.89   24.80 
  10  -9   0   22.50   16.00 
 -10  -9   0   13.20   16.50 
  10   9   0   43.40   34.00 
  10   9   0   67.19   22.30 
 -10   9   0   -8.30   28.00 
 -10   9   0   32.90   32.00 
 -10   9   0  -37.40   14.40 
 -11  -9   0   44.50   39.00 
 -11  -9   0   17.70   27.70 
  11  -9   0   59.09   37.00 
  11  -9   0   20.10   16.30 
 -11   9   0    0.80   36.10 
 -11   9   0   -9.10   31.30 
  11   9   0   36.50   25.10 
  11   9   0   33.90   39.70 
   0 -10   0  278.57   15.20 
   0 -10   0  283.27   16.10 
   0  10   0  299.37   17.20 
   0  10   0  291.37   15.10 
   0  10   0  299.37   15.70 
   0  10   0  287.27   14.40 
   1 -10   0  305.57   15.30 
   1 -10   0  306.87   18.00 
  -1 -10   0  276.87   17.30 
   1 -10   0  309.67   16.50 
  -1 -10   0  311.97   18.00 
  -1  10   0  313.87   17.40 
  -1  10   0  342.27   16.20 
   1  10   0  332.87   17.60 
   1  10   0  315.97   16.70 
   1  10   0  310.57   18.70 
  -1  10   0  322.27   18.40 
   1  10   0  333.17   11.40 
  -1  10   0  326.97   15.20 
   1  10   0  321.67   16.80 
  -2 -10   0   25.60   10.00 
   2 -10   0   24.20    7.00 
  -2 -10   0   29.70   11.60 
   2 -10   0   27.70    9.10 
  -2  10   0   21.50    6.50 
   2  10   0   26.00   10.50 
  -2  10   0   16.50    8.30 
  -2  10   0   35.20    7.30 
  -2  10   0   42.00   11.60 
   2  10   0   29.10   11.60 
  -2  10   0   29.20    6.20 
  -3 -10   0 1704.83   64.59 
  -3 -10   0 1975.40   66.19 
   3 -10   0 1909.61   60.89 
  -3 -10   0 1880.61   62.49 
  -3 -10   0 1972.00   57.19 
   3 -10   0 2071.19   66.39 
   3 -10   0 1930.01   61.29 
   3  10   0 2025.50   68.19 
   3  10   0 1836.22   62.79 
  -3  10   0 1815.62   61.29 
  -3  10   0 1982.00   65.29 
   3  10   0 1985.40   66.09 
  -3  10   0 1934.31   60.99 
  -3  10   0 1832.42   67.69 
  -4 -10   0  795.22   39.20 
  -4 -10   0  859.81   38.50 
  -4 -10   0  824.82   28.90 
   4 -10   0  792.72   30.50 
   4 -10   0  833.32   38.00 
  -4 -10   0  837.02   32.90 
   4  10   0  772.12   33.90 
   4  10   0  837.72   37.50 
  -4  10   0  815.22   36.80 
  -4  10   0  833.22   31.00 
  -4  10   0  728.73   37.20 
  -4  10   0  742.43   38.80 
   4  10   0  800.02   41.30 
   5 -10   0  305.77   28.30 
  -5 -10   0  285.47   19.10 
  -5 -10   0  290.97   29.80 
  -5 -10   0  266.87   17.80 
  -5 -10   0  260.07   26.20 
   5 -10   0  260.17   18.00 
  -5  10   0  340.07   23.70 
   5  10   0  271.97   22.50 
  -5  10   0  295.87   31.20 
   5  10   0  303.37   26.80 
  -5  10   0  314.47   26.00 
   5  10   0  254.47   32.20 
   6 -10   0  248.58   19.60 
   6 -10   0  257.27   19.80 
  -6 -10   0  188.98   24.00 
   6 -10   0  267.87   30.50 
  -6 -10   0  253.57   29.00 
  -6 -10   0  249.88   19.80 
  -6 -10   0  251.17   21.90 
  -6  10   0  247.88   30.60 
   6  10   0  273.27   23.80 
  -6  10   0  225.88   18.40 
   6  10   0  277.17   28.50 
  -6  10   0  246.58   27.50 
   6  10   0  205.38   26.40 
  -6  10   0  258.87   27.70 
  -7 -10   0  540.15   32.00 
   7 -10   0  478.35   41.50 
   7 -10   0  577.44   29.80 
  -7 -10   0  568.84   29.20 
  -7 -10   0  515.75   42.30 
   7 -10   0  545.75   27.50 
   7  10   0  424.96   42.20 
  -7  10   0  523.85   37.70 
  -7  10   0  516.15   45.10 
  -7  10   0  532.05   27.90 
   7  10   0  513.05   33.50 
   7  10   0  485.25   37.80 
  -7  10   0  561.44   39.80 
  -8 -10   0  446.56   44.80 
  -8 -10   0  506.05   36.00 
  -8 -10   0  461.55   30.30 
   8 -10   0  508.25   30.60 
   8 -10   0  576.24   48.80 
   8 -10   0  465.15   28.20 
   8  10   0  494.95   33.90 
  -8  10   0  481.15   48.40 
  -8  10   0  470.95   26.20 
   8  10   0  395.96   49.10 
  -8  10   0  529.55   42.90 
   9 -10   0  345.17   40.80 
  -9 -10   0  250.47   34.90 
  -9 -10   0  202.88   25.70 
   9 -10   0  213.98   25.70 
  -9 -10   0  275.37   29.60 
  -9  10   0  209.38   31.80 
  -9  10   0  262.37   23.60 
   9  10   0  224.78   26.10 
   9  10   0  258.57   39.50 
  -9  10   0  266.17   37.90 
  10 -10   0   71.89   34.90 
 -10 -10   0   39.40   24.20 
  10 -10   0   43.40   15.60 
 -10 -10   0   49.50   17.90 
 -10 -10   0   30.10   33.00 
 -10  10   0  -24.50   29.50 
 -10  10   0   10.00   27.40 
  10  10   0   14.80   20.00 
  10  10   0   22.20   35.40 
 -11 -10   0  230.98   33.50 
  11 -10   0  247.38   28.40 
  11 -10   0  348.27   51.89 
 -11 -10   0  277.67   45.90 
 -11  10   0  254.97   40.40 
  11  10   0  201.38   29.30 
 -11  10   0  151.78   41.50 
  11  10   0  289.77   46.90 
   0 -11   0   21.40    7.10 
   0 -11   0   19.70    6.60 
   0  11   0   15.30    6.80 
   0  11   0   25.20    6.40 
   0  11   0   34.70    8.80 
   0  11   0   26.30    6.80 
  -1 -11   0 2418.06   78.09 
   1 -11   0 2374.96   76.59 
   1 -11   0 2453.25   77.59 
  -1 -11   0 2539.25   79.29 
   1  11   0 2278.37   80.89 
  -1  11   0 2594.24   76.59 
  -1  11   0 2552.64   77.59 
   1  11   0 2508.35   78.29 
  -1  11   0 2658.03   79.29 
  -1  11   0 2653.03   78.99 
   1  11   0 2406.36   78.69 
   1  11   0 2457.65   79.39 
   1  11   0 2580.94   73.29 
  -2 -11   0 3543.75  107.09 
   2 -11   0 3499.55  103.89 
  -2 -11   0 3264.07  105.89 
   2  11   0 3379.66  106.19 
  -2  11   0 3603.44  103.89 
  -2  11   0 3300.67  103.19 
   2  11   0 3391.06  107.49 
   2  11   0 3277.07  104.79 
  -2  11   0 3517.45  103.39 
  -3 -11   0  572.04   18.00 
  -3 -11   0  561.84   17.80 
   3 -11   0  538.45   28.90 
  -3 -11   0  505.85   30.10 
  -3 -11   0  562.64   25.50 
   3 -11   0  546.55   23.90 
  -3 -11   0  573.34   29.20 
  -3  11   0  562.24   27.90 
  -3  11   0  536.35   23.90 
   3  11   0  550.04   26.60 
   3  11   0  605.44   33.00 
   3  11   0  566.24   29.00 
  -3  11   0  511.95   30.60 
  -3  11   0  551.64   23.90 
  -4 -11   0    8.00   14.30 
  -4 -11   0   26.20    9.50 
  -4 -11   0   36.50    6.60 
   4 -11   0   21.00   12.70 
  -4 -11   0   22.40   12.20 
   4 -11   0   12.60    7.10 
   4 -11   0   15.00    9.10 
  -4  11   0   42.30   16.20 
   4  11   0   63.39   19.90 
  -4  11   0   30.00   10.10 
   4  11   0   35.80   11.90 
  -4  11   0   36.20    9.00 
   4  11   0   29.60   12.10 
  -4  11   0   36.20   12.30 
  -5 -11   0 1403.96   58.39 
  -5 -11   0 1393.86   47.40 
   5 -11   0 1458.95   48.90 
  -5 -11   0 1425.96   65.19 
   5 -11   0 1483.15   50.39 
  -5 -11   0 1394.76   50.29 
   5 -11   0 1383.26   57.59 
  -5  11   0 1415.76   56.09 
  -5  11   0 1360.16   48.50 
   5  11   0 1418.56   61.19 
  -5  11   0 1342.77   58.69 
   5  11   0 1416.36   62.89 
   5  11   0 1411.36   51.89 
  -5  11   0 1403.66   52.39 
   6 -11   0 1001.00   40.20 
  -6 -11   0 1033.60   40.80 
   6 -11   0 1003.30   38.40 
   6 -11   0  986.80   49.50 
  -6 -11   0 1020.20   50.19 
  -6 -11   0  996.80   50.09 
  -6  11   0 1009.50   48.00 
  -6  11   0  972.80   52.59 
   6  11   0  911.51   51.69 
  -6  11   0  963.70   38.10 
   6  11   0 1011.60   46.70 
  -6  11   0  959.90   45.20 
   6  11   0 1053.19   42.90 
  -7 -11   0  740.13   35.50 
   7 -11   0  832.32   49.20 
  -7 -11   0  766.22   37.10 
  -7 -11   0  731.63   47.20 
   7 -11   0  765.42   34.00 
   7 -11   0  836.92   36.10 
  -7  11   0  677.93   44.50 
  -7  11   0  840.12   44.40 
   7  11   0  760.32   39.50 
   7  11   0  656.53   50.39 
  -7  11   0  752.52   52.79 
  -7  11   0  742.23   32.90 
   8 -11   0  153.08   17.00 
  -8 -11   0  121.69   28.90 
  -8 -11   0  110.79   20.40 
  -8 -11   0  113.39   17.60 
   8 -11   0  112.39   16.20 
   8 -11   0  190.98   32.70 
  -8  11   0  136.29   15.80 
  -8  11   0  125.49   25.90 
   8  11   0  127.79   21.10 
  -8  11   0   95.79   29.00 
   8  11   0  111.09   30.30 
  -9 -11   0 1663.83   66.19 
   9 -11   0 1556.64   58.59 
   9 -11   0 1613.84   78.59 
  -9 -11   0 1513.85   60.99 
  -9 -11   0 1613.14   79.49 
   9  11   0 1472.75   82.39 
  -9  11   0 1558.74   80.89 
  -9  11   0 1644.04   57.89 
  -9  11   0 1671.03   72.49 
   9  11   0 1611.74   64.89 
  10 -11   0  776.72   65.89 
  10 -11   0  623.04   35.30 
 -10 -11   0  670.23   49.70 
 -10 -11   0  671.93   61.59 
  10  11   0  633.54   43.60 
 -10  11   0  549.54   59.29 
 -10  11   0  629.04   54.79 
  10  11   0  644.84   63.29 
 -11 -11   0    5.60   29.40 
 -11 -11   0  -21.20   38.30 
  11 -11   0  130.49   42.80 
  11  11   0   16.90   24.60 
  11  11   0  138.49   44.30 
 -11  11   0    0.30   31.90 
 -11  11   0  -24.20   35.30 
   0 -12   0 2523.85   79.99 
   0  12   0 2558.94   78.59 
   0  12   0 2629.64   80.09 
   0  12   0 2615.34   82.29 
  -1 -12   0  183.68   17.20 
  -1 -12   0  170.38   17.40 
   1 -12   0  196.58   15.10 
   1 -12   0  203.88   13.60 
  -1  12   0  230.18   14.60 
   1  12   0  228.78   15.60 
  -1  12   0  181.98   15.30 
   1  12   0  203.48   18.30 
   1  12   0  218.88    9.60 
   1  12   0  222.28   16.00 
   1  12   0  214.28   15.60 
  -1  12   0  213.38   16.30 
  -1  12   0  247.28   13.60 
   2 -12   0    3.30    7.00 
  -2 -12   0    4.50   10.40 
  -2 -12   0   -5.70    8.70 
   2 -12   0    3.70    9.80 
   2  12   0   10.80    9.80 
  -2  12   0    4.80    5.90 
   2  12   0    6.10    8.90 
  -2  12   0    4.20    7.00 
   2  12   0   12.80   12.20 
  -2  12   0    4.60   10.50 
  -2  12   0    0.10    7.70 
  -2  12   0   15.30    6.90 
  -3 -12   0 1739.13   59.89 
  -3 -12   0 1651.43   60.39 
   3 -12   0 1596.04   59.69 
   3  12   0 1663.83   57.59 
   3  12   0 1676.83   61.39 
  -3  12   0 1657.93   55.29 
   3  12   0 1707.43   60.29 
  -3  12   0 1769.52   59.99 
  -3  12   0 1743.83   62.89 
  -3  12   0 1511.55   58.19 
  -3  12   0 1736.23   55.19 
   4 -12   0 3102.29   96.99 
   4 -12   0 3235.38   97.59 
  -4 -12   0 3098.09   98.69 
   4 -12   0 2993.60  102.59 
  -4 -12   0 3136.19  103.49 
  -4 -12   0 3117.39   92.79 
  -4 -12   0 3175.88  103.49 
   4  12   0 2963.80  104.29 
  -4  12   0 3369.06  103.29 
   4  12   0 3280.37  103.29 
   4  12   0 3044.80   99.29 
  -4  12   0 3257.77   97.49 
  -4  12   0 3016.10   97.99 
  -4  12   0 3025.60  105.49 
  -5 -12   0  451.85   31.80 
   5 -12   0  424.76   31.10 
   5 -12   0  421.76   22.40 
   5 -12   0  416.76   23.20 
  -5 -12   0  392.96   30.90 
  -5 -12   0  415.76   19.40 
  -5 -12   0  412.46   23.70 
   5  12   0  446.26   37.40 
  -5  12   0  454.05   29.90 
  -5  12   0  363.16   32.00 
   5  12   0  422.96   26.60 
   5  12   0  450.25   30.40 
  -5  12   0  402.46   26.30 
  -5  12   0  402.76   22.20 
  -6 -12   0  149.59   18.90 
   6 -12   0  207.98   19.00 
   6 -12   0  141.09   23.80 
   6 -12   0  150.38   18.70 
  -6 -12   0  166.58   25.10 
  -6 -12   0  157.88   24.50 
  -6 -12   0  169.18   17.60 
  -6  12   0  239.08   28.10 
   6  12   0  176.88   28.50 
  -6  12   0  170.08   21.10 
   6  12   0  194.18   23.80 
  -6  12   0  187.98   27.70 
   6  12   0  226.38   25.10 
  -6  12   0  196.28   18.70 
  -7 -12   0  664.73   46.50 
  -7 -12   0  717.73   36.00 
   7 -12   0  737.53   34.00 
   7 -12   0  759.52   35.10 
   7 -12   0  773.82   49.00 
  -7  12   0  772.02   51.49 
  -7  12   0  822.42   44.50 
  -7  12   0  718.83   33.40 
  -7  12   0  826.92   46.70 
   7  12   0  784.02   50.19 
   7  12   0  723.73   39.60 
   8 -12   0  516.65   48.90 
  -8 -12   0  462.65   48.60 
  -8 -12   0  568.34   34.70 
  -8 -12   0  520.35   32.00 
   8 -12   0  507.55   30.70 
   8 -12   0  478.85   29.50 
   8  12   0  417.16   51.09 
   8  12   0  515.55   36.30 
  -8  12   0  529.35   50.39 
  -8  12   0  486.85   28.00 
  -8  12   0  506.45   43.20 
   9 -12   0   87.79   31.80 
  -9 -12   0   61.09   29.80 
  -9 -12   0   60.79   16.80 
  -9 -12   0   86.29   22.20 
   9 -12   0   76.09   16.60 
   9  12   0  105.69   36.50 
  -9  12   0   69.89   15.80 
   9  12   0   83.79   21.30 
  -9  12   0   39.00   32.90 
  -9  12   0  105.69   27.10 
  10 -12   0   22.30   35.30 
 -10 -12   0   19.90   22.60 
  10 -12   0   41.70   16.30 
 -10 -12   0   15.50   32.60 
  10  12   0    0.70   34.70 
 -10  12   0  -16.00   29.40 
 -10  12   0  -10.90   34.60 
  10  12   0    2.00   21.10 
  11 -12   0  147.59   44.60 
 -11 -12   0  251.27   44.80 
 -11 -12   0  184.68   32.80 
 -11  12   0  167.88   39.20 
 -11  12   0  140.69   42.50 
  11  12   0  229.68   30.90 
  11  12   0  217.58   47.50 
   0 -13   0   23.00    7.30 
   0  13   0   23.30    6.70 
   0  13   0   10.70    7.40 
   0  13   0   16.20    9.20 
   0  13   0   16.80    6.90 
   1 -13   0   33.10    9.40 
  -1 -13   0   10.80    8.80 
  -1 -13   0   33.60    9.80 
   1 -13   0   26.20    7.30 
  -1  13   0   16.80    8.90 
   1  13   0   29.20    8.00 
  -1  13   0   19.60    6.50 
  -1  13   0   14.40    7.10 
   1  13   0   20.30   10.80 
  -1  13   0   25.20    8.40 
   1  13   0   13.40    7.60 
   1  13   0   24.70    9.40 
   1  13   0   21.10    4.60 
  -2 -13   0    5.30   11.20 
   2 -13   0   -1.30    8.30 
  -2 -13   0    9.50   10.40 
   2 -13   0   -4.90    9.60 
   2  13   0    5.20    9.80 
   2  13   0   -3.90    9.50 
   2  13   0    8.70   10.90 
  -2  13   0   10.30    9.10 
   2  13   0   15.70    8.50 
  -2  13   0   17.00   12.50 
  -2  13   0    1.30    6.30 
  -2  13   0    7.80    7.30 
   3 -13   0  184.08   16.60 
  -3 -13   0  185.88   20.20 
  -3 -13   0  137.59   17.20 
   3 -13   0  162.68   21.10 
  -3  13   0  142.19   14.60 
  -3  13   0  132.99   18.40 
   3  13   0  165.08   18.80 
  -3  13   0  177.08   14.40 
  -3  13   0  160.28   20.90 
   3  13   0  178.78   24.10 
   3  13   0  184.08   20.80 
  -3  13   0  184.18   14.70 
  -4 -13   0   -8.20   14.20 
  -4 -13   0   18.80   10.70 
  -4 -13   0    5.70    4.50 
   4 -13   0   -3.80   12.40 
  -4 -13   0    9.70    4.70 
   4 -13   0   13.30    9.40 
   4  13   0    5.60   17.50 
  -4  13   0   20.00   16.10 
  -4  13   0    7.50    9.70 
   4  13   0   10.80   12.00 
  -4  13   0    0.40    7.70 
  -4  13   0    4.70   12.00 
   4  13   0   -3.80   11.70 
   5 -13   0   23.10    8.70 
  -5 -13   0   26.20    7.40 
  -5 -13   0   16.80   13.10 
  -5 -13   0   18.30   16.30 
   5 -13   0   -0.20   13.50 
   5 -13   0   35.10   10.80 
  -5 -13   0   17.40    9.80 
  -5  13   0   26.60    9.50 
  -5  13   0   24.50   11.50 
  -5  13   0   49.99   14.00 
  -5  13   0   17.50   16.40 
   5  13   0   26.00   12.40 
   5  13   0   19.30   19.20 
  -6 -13   0   18.10   10.40 
  -6 -13   0    3.30   18.90 
   6 -13   0   10.70   10.70 
  -6 -13   0   13.40    8.80 
   6 -13   0   32.40   10.20 
   6 -13   0   -5.20   18.30 
  -6 -13   0  -18.50   14.60 
  -6  13   0   -9.80   10.10 
   6  13   0   12.10   22.80 
  -6  13   0   21.70   14.30 
   6  13   0   22.60   17.10 
  -6  13   0   40.90   17.80 
   6  13   0  -14.10   12.30 
  -6  13   0   -2.70   19.10 
  -7 -13   0   31.20   14.70 
   7 -13   0   14.80   12.60 
  -7 -13   0   -1.30   21.70 
   7 -13   0   18.80   11.90 
  -7 -13   0    9.60   12.80 
   7 -13   0   31.80   22.30 
  -7  13   0   26.50   12.40 
  -7  13   0    0.60   18.80 
   7  13   0   30.20   17.10 
  -7  13   0   25.60   25.20 
   7  13   0   -5.40   24.60 
  -7  13   0   22.40   18.80 
  -8 -13   0   39.30   16.90 
   8 -13   0   53.39   13.40 
  -8 -13   0   24.00   27.00 
  -8 -13   0   59.09   15.50 
   8 -13   0   53.99   27.00 
   8 -13   0   56.29   15.20 
   8  13   0   26.60   30.90 
  -8  13   0   75.89   23.70 
   8  13   0   41.90   19.40 
  -8  13   0   73.79   29.80 
  -8  13   0   87.09   14.60 
  -9 -13   0   11.70   30.50 
   9 -13   0    9.60   14.70 
   9 -13   0   21.00   29.30 
  -9 -13   0   44.40   20.30 
   9  13   0    6.40   35.00 
   9  13   0   10.10   20.90 
  -9  13   0    0.80   24.80 
  -9  13   0    4.50   30.10 
  -9  13   0    4.70   14.10 
 -10 -13   0  -40.70   21.50 
 -10 -13   0   45.90   31.50 
  10 -13   0   29.60   16.30 
  10 -13   0   46.20   35.60 
 -10  13   0  -47.80   33.10 
  10  13   0   -6.80   38.20 
 -10  13   0   -7.50   28.80 
  10  13   0  -35.90   21.20 
 -11 -13   0  137.99   40.10 
  11 -13   0  -11.10   41.70 
 -11 -13   0   -3.40   25.70 
 -11  13   0    3.90   34.00 
 -11  13   0   -3.70   41.20 
  11  13   0   45.80   25.20 
  11  13   0   30.50   41.60 
   0  14   0 2355.06   84.79 
   0  14   0 2651.03   80.69 
   0  14   0 2802.32   83.19 
   0  14   0 2695.83   85.29 
   1 -14   0  482.15   21.80 
   1 -14   0  466.75   24.10 
  -1 -14   0  516.45   25.30 
  -1 -14   0  448.06   24.60 
  -1  14   0  508.95   23.30 
   1  14   0  457.15   24.00 
   1  14   0  506.35   27.50 
   1  14   0  512.45   24.10 
   1  14   0  487.65   22.90 
   1  14   0  501.25   17.90 
  -1  14   0  492.05   24.70 
  -1  14   0  485.95   24.60 
  -1  14   0  466.05   21.80 
  -2 -14   0  -10.90   11.40 
   2 -14   0   -3.90    9.10 
   2 -14   0   -3.40   10.90 
  -2 -14   0    5.90   10.20 
   2  14   0   -2.30   12.10 
   2  14   0    3.70    9.60 
  -2  14   0    3.80   12.80 
   2  14   0    7.30   10.70 
   2  14   0    4.50   11.20 
  -2  14   0    3.30    7.70 
  -2  14   0    6.10    9.30 
  -2  14   0    0.70    6.70 
   3 -14   0 1163.98   42.70 
  -3 -14   0 1150.88   45.90 
  -3 -14   0 1163.38   47.10 
   3 -14   0 1109.59   46.00 
   3  14   0 1175.38   44.90 
   3  14   0 1140.49   47.80 
   3  14   0 1153.48   45.90 
  -3  14   0 1212.68   45.80 
  -3  14   0 1164.38   41.60 
  -3  14   0 1120.29   48.80 
   4 -14   0 1496.65   53.09 
  -4 -14   0 1451.65   59.19 
   4 -14   0 1548.74   58.79 
  -4 -14   0 1549.14   58.69 
  -4  14   0 1471.25   53.59 
  -4  14   0 1491.65   62.29 
  -4  14   0 1610.04   58.59 
  -4  14   0 1544.05   52.59 
   4  14   0 1573.74   58.99 
   4  14   0 1515.15   55.09 
   4  14   0 1544.55   62.19 
   5 -14   0  137.89   14.90 
  -5 -14   0  131.49   11.30 
  -5 -14   0  123.49   21.30 
   5 -14   0  148.09   21.80 
  -5 -14   0  156.98   22.20 
   5 -14   0  164.38   14.90 
  -5  14   0  142.29   16.70 
   5  14   0  152.48   20.40 
  -5  14   0  170.88   21.40 
   5  14   0  157.28   18.80 
   5  14   0  120.79   24.70 
  -5  14   0  144.39   17.20 
  -5  14   0  161.18   23.90 
   6 -14   0   37.70   11.70 
  -6 -14   0   21.60   20.70 
   6 -14   0   34.00   10.80 
   6 -14   0   27.60   18.40 
  -6 -14   0   29.90   18.30 
  -6 -14   0   33.10    8.80 
  -6  14   0   45.30   12.40 
  -6  14   0   31.40   21.30 
  -6  14   0   72.69   19.50 
  -6  14   0   54.59   16.00 
   6  14   0   32.90   24.30 
   6  14   0   41.00   15.10 
   6  14   0   32.80   17.50 
   7 -14   0  669.83   37.70 
  -7 -14   0  573.74   31.40 
   7 -14   0  642.84   32.20 
   7 -14   0  662.93   47.60 
  -7 -14   0  562.74   33.70 
  -7 -14   0  588.04   45.50 
  -7  14   0  586.94   31.20 
  -7  14   0  633.94   50.29 
  -7  14   0  669.33   41.70 
   7  14   0  655.83   39.00 
   7  14   0  592.24   51.99 
   8 -14   0  886.41   38.30 
   8 -14   0  804.62   39.50 
  -8 -14   0  847.12   55.59 
   8 -14   0  787.22   55.69 
  -8 -14   0  809.22   40.00 
   8  14   0  813.82   59.59 
  -8  14   0  857.11   50.19 
   8  14   0  791.42   44.70 
  -8  14   0  752.52   58.09 
  -8  14   0  795.72   37.40 
   9 -14   0  173.58   34.70 
  -9 -14   0  167.48   24.10 
   9 -14   0  238.58   27.00 
  -9 -14   0  200.28   34.60 
   9  14   0  176.48   27.10 
  -9  14   0  185.68   31.80 
  -9  14   0  154.38   18.90 
  -9  14   0  176.28   46.00 
  10 -14   0  106.39   19.80 
 -10 -14   0  202.68   39.70 
  10 -14   0  147.49   38.50 
 -10 -14   0  130.99   25.60 
 -10  14   0   44.30   34.90 
  10  14   0  203.08   45.70 
  10  14   0  128.89   26.30 
 -10  14   0  113.29   34.20 
 -11 -14   0  246.48   34.00 
  11 -14   0  301.67   51.29 
 -11 -14   0  343.87   50.29 
 -11  14   0  303.77   42.40 
  11  14   0  280.27   52.89 
  11  14   0  325.77   35.80 
 -11  14   0  278.67   50.49 
   0 -15   0    4.30    8.60 
   0  15   0    5.40    7.10 
   0  15   0   15.30    8.10 
   0  15   0   20.50   12.20 
   0  15   0    9.50    8.00 
  -1 -15   0 1686.13   56.89 
   1 -15   0 1637.24   55.89 
  -1 -15   0 1490.05   55.19 
   1  15   0 1594.54   49.00 
   1  15   0 1584.34   55.79 
  -1  15   0 1451.35   55.59 
   1  15   0 1648.73   55.39 
  -1  15   0 1539.45   56.49 
  -1  15   0 1724.13   56.69 
   1  15   0 1558.04   54.89 
  -1  15   0 1628.64   55.29 
  -1  15   0 1645.84   54.49 
   1  15   0 1550.04   57.49 
   2 -15   0 3034.70  100.29 
  -2 -15   0 3109.29  101.99 
  -2 -15   0 3220.38  103.19 
   2 -15   0 3211.18  102.99 
  -2  15   0 2920.31  101.49 
   2  15   0 3205.28  104.29 
   2  15   0 3326.47  102.79 
  -2  15   0 3382.16  103.09 
   2  15   0 3172.68  101.89 
   2  15   0 3364.76  101.59 
  -2  15   0 3332.97  100.19 
  -2  15   0 3240.28  103.79 
  -3 -15   0 1432.66   53.89 
  -3 -15   0 1419.66   54.29 
   3 -15   0 1284.17   52.79 
   3 -15   0 1331.97   49.30 
  -3  15   0 1343.87   48.60 
  -3  15   0 1412.06   52.79 
   3  15   0 1442.06   55.89 
  -3  15   0 1439.46   56.49 
  -3  15   0 1446.66   48.90 
   3  15   0 1341.17   51.09 
   3  15   0 1409.66   52.79 
  -3  15   0 1384.96   47.50 
   4 -15   0  127.29   15.00 
  -4 -15   0   81.59   17.00 
   4 -15   0  105.69   17.60 
  -4 -15   0  109.59   17.50 
   4  15   0  113.59   19.90 
   4  15   0  126.49   17.80 
  -4  15   0  109.79   14.60 
  -4  15   0  114.89   12.80 
   4  15   0  110.09   15.40 
  -4  15   0   89.69   12.20 
  -4  15   0  109.29   20.30 
  -4  15   0  117.69   17.50 
   5 -15   0 1661.73   57.59 
  -5 -15   0 1677.13   50.19 
  -5 -15   0 1650.13   66.09 
   5 -15   0 1591.74   64.49 
  -5 -15   0 1591.64   64.19 
  -5 -15   0 1667.73   50.39 
   5  15   0 1670.83   64.79 
   5  15   0 1625.74   68.99 
  -5  15   0 1599.34   67.19 
  -5  15   0 1560.84   68.69 
   5  15   0 1594.84   60.69 
  -5  15   0 1689.93   56.99 
  -5  15   0 1590.74   58.89 
  -6 -15   0  788.62   48.70 
   6 -15   0  886.91   36.30 
   6 -15   0  801.22   46.80 
  -6 -15   0  857.11   31.40 
   6 -15   0  856.81   37.00 
   6  15   0  852.51   42.00 
  -6  15   0  861.81   36.80 
  -6  15   0  852.61   41.30 
   6  15   0  779.12   46.40 
   6  15   0  870.21   50.79 
  -6  15   0  794.92   51.59 
  -6  15   0  795.82   44.80 
   7 -15   0  894.01   39.00 
  -7 -15   0  840.72   39.50 
   7 -15   0  866.31   52.39 
  -7 -15   0  983.80   54.79 
   7  15   0  867.41   45.10 
   7  15   0  885.81   56.99 
  -7  15   0  870.41   56.49 
  -7  15   0  887.11   39.30 
  -7  15   0  934.21   48.40 
   8 -15   0   69.29   27.90 
   8 -15   0   28.10   15.20 
   8 -15   0   34.50   14.00 
  -8 -15   0  109.79   29.90 
  -8 -15   0   21.20   15.30 
  -8  15   0   36.90   22.40 
  -8  15   0   50.99   15.20 
  -8  15   0   41.80   28.90 
   8  15   0   39.40   29.00 
   8  15   0   27.20   19.50 
  -9 -15   0  974.40   46.70 
   9 -15   0 1027.90   44.50 
   9 -15   0 1018.60   67.59 
   9  15   0  996.20   53.29 
  -9  15   0  744.93   71.59 
  -9  15   0  955.40   43.00 
   9  15   0  910.91   71.49 
  -9  15   0 1066.49   58.89 
 -10 -15   0  768.32   67.29 
  10 -15   0  849.32   70.49 
  10 -15   0  763.32   41.00 
 -10 -15   0  642.94   46.20 
  10  15   0  826.92   71.69 
  10  15   0  873.81   51.09 
 -10  15   0  641.34   64.69 
 -10  15   0  727.83   58.09 
  11 -15   0   34.10   44.00 
 -11 -15   0   81.49   43.60 
 -11 -15   0   39.20   27.80 
  11  15   0   67.69   29.20 
  11  15   0   79.09   46.30 
 -11  15   0   66.29   34.70 
 -11  15   0   28.00   36.70 
   0 -16   0  359.66   21.90 
   0  16   0  379.36   21.30 
   0  16   0  361.56   19.30 
   0  16   0  374.66   21.60 
   0  16   0  378.36   25.00 
  -1 -16   0  253.07   20.00 
   1 -16   0  212.88   18.40 
  -1 -16   0  231.88   20.00 
   1 -16   0  258.37   21.40 
  -1  16   0  225.08   19.70 
  -1  16   0  250.57   17.50 
   1  16   0  275.67   21.60 
  -1  16   0  242.18   21.30 
   1  16   0  288.87   23.40 
  -1  16   0  224.08   22.20 
   1  16   0  247.68   19.30 
  -1  16   0  225.08   18.00 
   1  16   0  248.28   12.60 
  -2 -16   0   52.59   14.60 
   2 -16   0   33.70   11.10 
   2 -16   0   36.50   12.60 
  -2 -16   0   31.10   11.30 
   2  16   0   54.59   12.50 
   2  16   0   53.19   12.40 
   2  16   0   44.30   15.00 
  -2  16   0   63.29    9.80 
  -2  16   0   40.40   11.40 
   2  16   0   61.09   12.20 
  -2  16   0   54.59   11.00 
  -2  16   0   60.79   14.90 
  -3 -16   0  768.52   37.40 
  -3 -16   0  841.92   37.30 
   3 -16   0  741.33   33.60 
   3 -16   0  731.93   36.80 
   3  16   0  807.62   36.30 
  -3  16   0  806.32   31.20 
  -3  16   0  801.52   32.50 
   3  16   0  722.63   34.80 
   3  16   0  781.82   34.30 
  -3  16   0  832.22   37.10 
  -3  16   0  774.82   40.00 
   3  16   0  757.02   40.30 
  -3  16   0  744.23   32.30 
  -4 -16   0  645.54   36.90 
   4 -16   0  608.84   34.80 
  -4 -16   0  556.64   35.90 
   4 -16   0  608.54   29.60 
  -4  16   0  650.33   34.00 
   4  16   0  603.04   33.10 
  -4  16   0  581.54   29.70 
  -4  16   0  603.94   27.30 
  -4  16   0  552.24   37.90 
   4  16   0  618.24   32.60 
   4  16   0  637.04   39.90 
  -4  16   0  613.14   28.00 
   5 -16   0  342.07   31.00 
  -5 -16   0  343.67   33.50 
   5 -16   0  363.16   25.30 
  -5 -16   0  292.67   26.90 
  -5  16   0  412.66   29.40 
   5  16   0  423.16   37.00 
   5  16   0  375.36   32.20 
  -5  16   0  377.66   26.00 
  -5  16   0  387.86   24.20 
   5  16   0  343.27   27.90 
  -5  16   0  396.26   34.40 
  -6 -16   0  224.68   14.10 
  -6 -16   0  215.78   28.80 
   6 -16   0  186.68   27.00 
   6 -16   0  227.58   23.00 
  -6 -16   0  225.98   15.20 
  -6  16   0  208.38   21.90 
  -6  16   0  205.58   25.90 
   6  16   0  227.68   33.80 
  -6  16   0  244.18   28.10 
   6  16   0  223.08   27.90 
  -6  16   0  193.38   31.40 
  -7 -16   0  301.67   36.40 
   7 -16   0  347.57   28.10 
  -7 -16   0  329.47   21.00 
   7 -16   0  385.26   40.40 
  -7  16   0  396.36   26.60 
   7  16   0  321.07   38.70 
  -7  16   0  289.97   36.00 
  -7  16   0  334.87   35.30 
   7  16   0  346.77   33.00 
  -8 -16   0  293.97   37.10 
   8 -16   0  323.87   28.70 
   8 -16   0  285.67   37.70 
  -8 -16   0  271.17   26.60 
   8  16   0  298.37   40.90 
   8  16   0  223.48   26.80 
  -8  16   0  269.27   40.40 
  -8  16   0  300.47   37.50 
  -8  16   0  324.67   27.00 
  -9 -16   0    7.70   31.00 
  -9 -16   0    4.90   17.80 
   9 -16   0   34.00   29.20 
   9 -16   0   18.90   16.70 
  -9  16   0   26.80   27.00 
  -9  16   0   32.10   16.10 
  -9  16   0   43.20   35.10 
   9  16   0    7.70   33.60 
   9  16   0   11.00   23.30 
 -10 -16   0   80.59   34.70 
  10 -16   0   25.60   31.90 
 -10 -16   0  -11.30   21.10 
  10 -16   0    5.70   17.10 
 -10  16   0   39.20   31.00 
 -10  16   0   61.89   37.30 
  10  16   0   47.10   43.40 
  10  16   0   25.30   24.90 
 -11 -16   0  170.48   42.40 
  11 -16   0  246.88   47.70 
 -11  16   0  150.08   39.50 
 -11  16   0  190.68   47.90 
  11  16   0  147.79   51.59 
  11  16   0  105.49   31.70 
   0 -17   0   20.60    9.80 
   0  17   0   13.10    8.70 
   0  17   0    2.10    9.00 
   0  17   0   19.30   12.90 
   0  17   0   12.70    7.80 
  -1 -17   0   14.70   11.00 
  -1 -17   0    8.40   10.00 
   1 -17   0   12.20   11.30 
   1 -17   0    6.80    9.70 
  -1  17   0   -8.60    9.00 
   1  17   0    7.00   10.30 
  -1  17   0   -3.60    9.80 
  -1  17   0    8.40   11.50 
   1  17   0   21.60    6.20 
  -1  17   0    3.10   11.50 
   1  17   0    6.80    9.00 
  -1  17   0   13.30    8.30 
   1  17   0   11.10   12.60 
   1  17   0   -3.20    8.50 
   2 -17   0  218.28   22.90 
   2 -17   0  219.68   20.40 
  -2 -17   0  191.98   20.60 
  -2 -17   0  209.08   22.20 
   2  17   0  193.78   19.70 
   2  17   0  209.98   20.10 
   2  17   0  233.58   19.30 
  -2  17   0  219.78   15.70 
  -2  17   0  231.98   23.00 
  -2  17   0  219.38   17.40 
  -2  17   0  231.98   20.30 
   2  17   0  253.87   25.90 
   3 -17   0  290.27   25.60 
  -3 -17   0  225.48   25.50 
  -3 -17   0  341.07   25.40 
   3 -17   0  277.07   21.70 
   3  17   0  249.68   21.50 
  -3  17   0  267.67   19.20 
  -3  17   0  315.77   24.30 
  -3  17   0  285.37   20.60 
  -3  17   0  285.17   27.20 
   3  17   0  264.47   22.00 
   3  17   0  265.77   28.50 
  -3  17   0  260.37   17.90 
   3  17   0  247.28   23.30 
   4 -17   0    9.10   11.70 
  -4 -17   0    8.60   15.70 
  -4 -17   0    6.90   12.30 
   4 -17   0    1.70   14.30 
  -4  17   0    7.50    9.60 
  -4  17   0   -0.80    9.90 
   4  17   0   12.10   13.20 
  -4  17   0  -16.10    8.10 
   4  17   0    9.80   18.50 
  -4  17   0    0.60   16.90 
  -4  17   0  -10.00   11.90 
   4  17   0   -3.30   12.10 
   4  17   0    2.50   10.80 
   5 -17   0  164.48   23.90 
   5 -17   0  181.78   21.80 
  -5 -17   0  169.28   23.20 
  -5 -17   0  122.29   20.60 
   5  17   0  141.69   21.00 
  -5  17   0  234.98   26.70 
  -5  17   0  160.68   19.40 
  -5  17   0  180.28   22.40 
  -5  17   0  147.49   17.90 
   5  17   0  166.48   26.60 
  -5  17   0  183.68   27.90 
   5  17   0  164.18   20.00 
  -6 -17   0   14.20   21.70 
   6 -17   0   23.40   20.80 
   6 -17   0   12.70   13.20 
  -6 -17   0   29.70    6.70 
  -6 -17   0   23.40    7.20 
  -6  17   0   17.30   16.30 
  -6  17   0   31.90   16.80 
  -6  17   0   46.10   12.60 
   6  17   0   51.19   27.00 
  -6  17   0   26.80   24.60 
   6  17   0   28.70   17.60 
  -7 -17   0   19.20    9.80 
  -7 -17   0   16.60    8.40 
  -7 -17   0   12.30   25.30 
   7 -17   0    2.30   21.00 
   7 -17   0    7.50   14.50 
   7  17   0    1.80   18.10 
  -7  17   0   11.10   13.20 
   7  17   0   16.70   28.80 
  -7  17   0   -9.90   24.70 
  -7  17   0    0.80   19.40 
   8 -17   0    4.70   25.50 
   8 -17   0    7.50   16.60 
  -8 -17   0    1.70   15.00 
  -8 -17   0  -12.00   26.80 
  -8  17   0    4.90   30.10 
  -8  17   0   58.69   23.80 
   8  17   0    2.70   19.70 
  -8  17   0   32.60   16.30 
   8  17   0   15.90   32.30 
   9 -17   0   24.30   29.90 
  -9 -17   0   21.40   30.80 
   9 -17   0   28.00   18.00 
  -9 -17   0  -12.20   17.30 
   9  17   0   38.90   23.50 
  -9  17   0    5.90   33.40 
   9  17   0   -9.50   34.20 
  -9  17   0   42.30   28.70 
  -9  17   0   58.39   17.30 
  10 -17   0   16.30   17.80 
  10 -17   0   96.09   36.80 
 -10 -17   0   17.50   22.30 
 -10 -17   0   42.70   37.70 
  10  17   0  108.89   44.20 
 -10  17   0   19.00   39.20 
 -10  17   0  -11.90   30.00 
  10  17   0   79.19   25.10 
   0 -18   0 5331.97  161.58 
   0  18   0 5411.26  161.78 
   0  18   0 5219.08  158.68 
   0  18   0 5337.67  164.78 
   0  18   0 5329.17  162.28 
   0  18   0 5346.06  164.68 
   1 -18   0 1317.37   49.20 
  -1 -18   0 1438.46   52.09 
  -1 -18   0 1344.47   50.49 
   1 -18   0 1381.16   50.79 
  -1  18   0 1381.66   51.69 
   1  18   0 1286.27   49.30 
   1  18   0 1373.76   51.39 
  -1  18   0 1382.66   48.20 
   1  18   0 1361.36   53.69 
   1  18   0 1365.26   43.40 
  -1  18   0 1331.57   49.10 
   1  18   0 1362.46   50.19 
  -1  18   0 1325.77   52.59 
  -1  18   0 1369.46   50.09 
  -2 -18   0   19.70   13.30 
  -2 -18   0   29.60   11.40 
   2 -18   0   24.40   12.90 
   2  18   0   32.90   12.90 
   2  18   0   33.40   11.10 
  -2  18   0   34.70   14.30 
  -2  18   0   37.40    9.90 
  -2  18   0   38.30    9.10 
  -2  18   0   25.30   12.10 
   2  18   0   52.69   16.60 
   2  18   0   30.60   12.10 
   3 -18   0 1454.55   57.79 
  -3 -18   0 1441.36   56.79 
  -3 -18   0 1538.25   58.49 
   3 -18   0 1433.36   53.29 
  -3  18   0 1467.75   56.79 
   3  18   0 1476.95   59.79 
  -3  18   0 1390.86   58.39 
   3  18   0 1352.76   54.69 
   3  18   0 1447.66   55.39 
  -3  18   0 1503.25   52.29 
   3  18   0 1508.15   54.29 
  -3  18   0 1415.76   50.69 
  -3  18   0 1437.26   51.89 
   4 -18   0 1837.72   70.59 
  -4 -18   0 1874.31   70.49 
   4 -18   0 1905.41   65.19 
  -4 -18   0 1879.71   70.59 
  -4  18   0 1874.11   72.39 
  -4  18   0 1977.90   64.49 
   4  18   0 1834.92   73.89 
   4  18   0 1834.42   67.29 
  -4  18   0 1810.62   64.19 
   4  18   0 1871.81   69.49 
   4  18   0 1825.72   66.19 
  -4  18   0 1804.82   62.79 
   5 -18   0  343.97   26.50 
  -5 -18   0  305.27   31.80 
   5 -18   0  327.67   33.00 
  -5 -18   0  426.46   33.00 
  -5  18   0  377.86   23.80 
  -5  18   0  359.26   39.20 
   5  18   0  366.06   39.00 
   5  18   0  361.46   31.40 
  -5  18   0  370.36   27.20 
   5  18   0  362.26   30.30 
  -5  18   0  349.17   24.20 
  -5  18   0  335.77   30.70 
   6 -18   0   35.00   14.00 
  -6 -18   0   29.10   23.20 
   6 -18   0   20.30   19.30 
   6  18   0   40.90   28.00 
   6  18   0   20.60   17.20 
  -6  18   0   29.50   16.80 
  -6  18   0   20.60   24.20 
  -6  18   0   45.40   14.00 
  -6  18   0   42.80   19.30 
  -6  18   0   65.59   13.70 
   7 -18   0 1107.19   58.39 
  -7 -18   0 1134.49   61.39 
  -7 -18   0 1098.49   38.10 
   7 -18   0 1020.30   46.60 
  -7 -18   0 1125.49   37.60 
   7  18   0 1120.19   66.79 
  -7  18   0 1103.89   46.00 
  -7  18   0 1108.09   65.29 
  -7  18   0 1193.88   52.09 
   7  18   0 1121.49   52.79 
  -8 -18   0 1248.58   45.30 
   8 -18   0 1266.07   52.99 
  -8 -18   0 1337.87   69.99 
   8 -18   0 1377.16   69.69 
  -8 -18   0 1238.08   45.80 
   8  18   0 1331.07   60.19 
  -8  18   0 1228.78   70.39 
  -8  18   0 1305.67   52.59 
   8  18   0 1216.78   74.19 
  -8  18   0 1391.66   61.99 
   9 -18   0  260.87   41.30 
   9 -18   0  230.88   24.30 
  -9 -18   0  275.37   27.40 
  -9 -18   0  265.27   42.40 
  -9  18   0  238.08   40.40 
   9  18   0  191.18   41.00 
  -9  18   0  257.67   35.20 
   9  18   0  252.77   31.80 
 -10 -18   0  127.59   41.50 
  10 -18   0   73.09   35.90 
 -10 -18   0   74.99   22.00 
  10 -18   0  118.99   20.90 
  10  18   0   91.99   29.00 
 -10  18   0   94.79   40.20 
 -10  18   0   78.59   34.20 
  10  18   0  185.18   47.90 
   0 -19   0   -6.50    9.30 
   0  19   0   17.00    9.30 
   0  19   0   -4.90    8.00 
   0  19   0  -13.50   10.20 
   0  19   0    6.80    7.90 
   0  19   0   23.60   12.60 
   1 -19   0  587.44   31.00 
  -1 -19   0  607.44   30.30 
   1 -19   0  547.65   28.70 
  -1 -19   0  575.54   30.60 
   1  19   0  569.44   28.60 
   1  19   0  600.44   29.40 
   1  19   0  617.24   31.70 
  -1  19   0  625.74   31.20 
   1  19   0  590.84   33.20 
  -1  19   0  617.54   30.40 
   1  19   0  603.14   22.50 
  -1  19   0  605.84   27.40 
  -1  19   0  589.44   28.90 
  -1  19   0  567.44   32.30 
  -2 -19   0 2831.72   94.89 
  -2 -19   0 2874.61   95.79 
   2 -19   0 2707.63   92.89 
  -2  19   0 2816.92   92.09 
   2  19   0 2725.63   96.89 
  -2  19   0 3031.30   91.29 
  -2  19   0 2826.62   95.59 
   2  19   0 2848.62   94.69 
  -2  19   0 2950.90   95.89 
   2  19   0 2849.22   93.79 
   2  19   0 3019.30   95.59 
  -3 -19   0 1076.79   47.30 
  -3 -19   0 1044.70   45.90 
   3 -19   0 1016.60   46.90 
   3 -19   0 1082.89   43.50 
   3  19   0 1125.29   50.19 
   3  19   0 1018.50   45.00 
   3  19   0 1073.89   46.10 
   3  19   0 1008.70   49.50 
  -3  19   0 1132.89   46.40 
  -3  19   0 1092.19   49.60 
  -3  19   0 1066.69   42.00 
  -3  19   0 1045.70   40.00 
  -3  19   0 1016.90   41.60 
  -4 -19   0  166.68   22.00 
   4 -19   0  208.38   27.30 
  -4 -19   0  156.68   21.50 
   4 -19   0  179.08   22.30 
   4  19   0  144.69   20.60 
  -4  19   0  221.58   24.30 
  -4  19   0  175.68   21.10 
   4  19   0  136.09   24.30 
  -4  19   0  221.38   28.10 
  -4  19   0  203.78   18.40 
  -4  19   0  236.78   19.70 
   4  19   0  153.08   19.10 
   4  19   0  219.68   22.20 
  -5 -19   0 1224.38   56.29 
   5 -19   0 1298.07   51.19 
  -5 -19   0 1246.68   57.29 
   5 -19   0 1280.17   59.09 
   5  19   0 1265.27   63.09 
  -5  19   0 1329.87   63.19 
   5  19   0 1345.37   53.09 
  -5  19   0 1316.07   51.49 
   5  19   0 1252.17   55.79 
  -5  19   0 1263.17   49.30 
   5  19   0 1291.07   54.99 
  -5  19   0 1350.16   49.70 
  -5  19   0 1324.67   56.79 
  -6 -19   0  751.22   49.10 
   6 -19   0  731.43   47.20 
   6 -19   0  805.52   37.80 
   6  19   0  812.62   55.39 
  -6  19   0  720.33   49.70 
  -6  19   0  784.92   40.00 
   6  19   0  736.73   42.70 
  -6  19   0  744.53   37.30 
  -6  19   0  739.03   37.30 
   7 -19   0  387.76   31.00 
   7 -19   0  376.96   40.60 
  -7 -19   0  231.68   32.80 
  -7 -19   0  348.17   15.30 
   7  19   0  322.47   36.20 
  -7  19   0  362.56   27.80 
  -7  19   0  349.87   32.40 
   7  19   0  317.87   42.60 
  -7  19   0  333.87   41.30 
   8 -19   0  242.38   29.40 
  -8 -19   0  163.58   33.80 
   8 -19   0  168.28   33.20 
  -8 -19   0  179.58   16.70 
  -8 -19   0  193.18   17.50 
   8  19   0  212.98   40.10 
   8  19   0  194.38   27.80 
  -8  19   0  154.88   34.40 
  -8  19   0  190.08   29.10 
  -9 -19   0  612.64   59.69 
   9 -19   0  664.63   37.80 
  -9  19   0  478.35   42.10 
  -9  19   0  570.64   62.59 
  -9  19   0  635.14   51.09 
   9  19   0  553.24   63.19 
   9  19   0  590.54   48.10 
 -10 -19   0  642.34   68.29 
  10 -19   0  668.23   41.90 
  10 -19   0  684.73   65.19 
 -10  19   0  621.44   69.89 
  10  19   0  644.44   51.29 
  10  19   0  709.23   73.69 
 -10  19   0  592.04   57.29 
   0 -20   0  108.49   15.30 
   0  20   0   98.79   14.70 
   0  20   0  100.49   11.40 
   0  20   0  114.19   14.30 
   0  20   0  102.39   15.10 
   0  20   0   84.99   16.60 
  -1 -20   0   62.59   14.00 
   1 -20   0   76.89   14.00 
  -1 -20   0   98.99   15.10 
   1  20   0   79.99    9.00 
  -1  20   0   90.39   13.10 
   1  20   0   66.49   16.70 
  -1  20   0   74.59   14.80 
   1  20   0  102.99   14.30 
  -1  20   0   92.59   16.60 
  -1  20   0   69.39   15.30 
   1  20   0   71.89   14.30 
   1  20   0   82.29   14.30 
  -1  20   0   89.49   12.90 
   2 -20   0   14.90   12.90 
  -2 -20   0   22.00   11.90 
   2 -20   0    9.70   10.70 
  -2 -20   0   16.40   13.60 
   2  20   0   32.40   16.60 
  -2  20   0    2.90   13.80 
   2  20   0   23.20   12.10 
  -2  20   0   15.60    8.00 
  -2  20   0   27.80   12.10 
   2  20   0   13.20   12.70 
   2  20   0    4.10   12.50 
  -2  20   0   11.50    9.70 
   3 -20   0  297.57   24.60 
  -3 -20   0  264.77   24.90 
   3 -20   0  250.37   27.40 
  -3 -20   0  246.08   27.90 
  -3  20   0  229.28   24.50 
  -3  20   0  258.87   20.80 
  -3  20   0  253.67   29.30 
  -3  20   0  257.27   19.40 
   3  20   0  275.07   26.00 
   3  20   0  258.37   22.10 
   3  20   0  269.67   24.00 
  -3  20   0  254.77   22.40 
   3  20   0  247.38   30.20 
  -4 -20   0  131.39   20.40 
  -4 -20   0  102.39   19.80 
   4 -20   0  137.29   22.50 
   4 -20   0  103.69   17.20 
   4  20   0  114.09   18.80 
   4  20   0   97.49   18.30 
  -4  20   0  105.79   22.20 
  -4  20   0  129.19   16.10 
   4  20   0   92.39   15.20 
  -4  20   0  137.89   17.00 
  -4  20   0  132.59   15.00 
  -4  20   0  132.89   19.00 
   4  20   0  109.09   25.30 
  -5 -20   0   34.40   20.00 
   5 -20   0   24.00   15.10 
   5 -20   0   29.50   20.10 
  -5  20   0   27.80   13.30 
  -5  20   0   14.20   15.90 
  -5  20   0    8.30   12.20 
   5  20   0   25.40   17.10 
  -5  20   0   18.30   22.40 
   5  20   0   54.09   15.30 
   5  20   0   48.10   25.90 
  -5  20   0   23.90   15.00 
  -6 -20   0   30.60   22.60 
   6 -20   0   52.39   23.30 
   6 -20   0   64.09   16.80 
  -6  20   0   64.69   17.90 
  -6  20   0   72.39   15.50 
  -6  20   0   83.39   16.00 
   6  20   0   25.50   27.90 
   6  20   0   54.69   20.80 
  -6  20   0   50.99   26.30 
   6  20   0   85.99   20.60 
   7 -20   0  274.27   36.00 
  -7 -20   0  283.37   35.80 
   7 -20   0  254.77   29.10 
  -7  20   0  183.38   21.40 
   7  20   0  223.78   27.90 
  -7  20   0  261.07   27.70 
   7  20   0  201.28   37.20 
  -7  20   0  261.97   38.10 
   8 -20   0  363.36   44.40 
  -8 -20   0  272.17   15.30 
   8 -20   0  293.97   30.80 
  -8 -20   0  270.37   15.60 
   8  20   0  252.17   31.20 
  -8  20   0  275.77   31.50 
  -8  20   0  287.57   29.70 
  -8  20   0  211.98   65.69 
  -9 -20   0   16.50   31.90 
   9 -20   0   26.20   18.60 
   9 -20   0   16.10   29.60 
  -9 -20   0   23.00   11.10 
  -9  20   0   28.90   27.70 
   9  20   0   11.30   24.60 
  -9  20   0  -61.09   36.60 
   9  20   0   -1.40   36.00 
  10 -20   0  -35.00   31.90 
  10 -20   0  -27.30   21.00 
 -10 -20   0   25.40   33.60 
 -10  20   0  -12.30   31.00 
  10  20   0   57.69   44.90 
  10  20   0   34.20   28.10 
 -10  20   0  -12.00   40.40 
   0 -21   0    7.60   11.00 
   0  21   0   23.40   12.60 
   0  21   0   12.90    8.70 
   0  21   0    6.60   10.00 
   0  21   0   12.00   15.50 
   0  21   0    6.60   12.90 
  -1 -21   0  122.39   16.50 
   1 -21   0  130.49   15.20 
  -1 -21   0  130.59   16.00 
   1  21   0  147.59   16.90 
   1  21   0  158.98   19.60 
   1  21   0  139.59   18.10 
  -1  21   0  126.59   16.10 
  -1  21   0  163.58   20.60 
   1  21   0  139.59   12.40 
  -1  21   0  130.49   15.10 
  -1  21   0  119.19   16.70 
   1  21   0  148.79   21.10 
  -1  21   0  140.69   16.60 
   2 -21   0  468.45   29.00 
   2 -21   0  430.26   26.40 
  -2 -21   0  397.46   28.90 
  -2 -21   0  466.25   27.60 
   2  21   0  477.15   33.00 
  -2  21   0  400.86   27.50 
  -2  21   0  415.76   23.90 
  -2  21   0  462.05   25.80 
   2  21   0  418.36   29.60 
   2  21   0  440.46   32.10 
  -2  21   0  408.76   30.70 
   2  21   0  464.65   26.80 
  -2  21   0  444.66   30.40 
  -3 -21   0  133.89   19.20 
  -3 -21   0  148.39   21.40 
   3 -21   0  152.48   18.70 
   3 -21   0  158.88   22.10 
   3  21   0  130.49   18.10 
  -3  21   0  155.08   16.40 
  -3  21   0  160.18   16.80 
   3  21   0  156.88   20.80 
  -3  21   0  130.89   16.30 
  -3  21   0  164.38   22.10 
   3  21   0  136.69   22.80 
  -3  21   0  112.29   21.00 
   3  21   0  140.69   20.50 
   4 -21   0   41.70   18.80 
  -4 -21   0   48.20   17.70 
   4 -21   0   63.49   16.10 
  -4 -21   0   48.70   17.20 
  -4  21   0   44.00   22.10 
   4  21   0   40.10   17.80 
  -4  21   0   50.49   14.10 
  -4  21   0   40.70   12.30 
  -4  21   0   30.00   13.10 
   4  21   0   57.49   22.00 
  -4  21   0   36.50   16.10 
   4  21   0   35.90   18.40 
   4  21   0   59.69   16.20 
   5 -21   0  226.08   27.70 
  -5 -21   0  229.78   28.10 
   5 -21   0  251.67   26.70 
   5  21   0  212.98   25.10 
  -5  21   0  228.58   26.50 
  -5  21   0  239.28   22.70 
  -5  21   0  308.17   26.30 
   5  21   0  248.98   35.10 
  -5  21   0  296.17   36.10 
  -5  21   0  285.77   31.20 
   5  21   0  278.77   26.40 
   6 -21   0  390.36   31.60 
  -6 -21   0  304.07   34.20 
   6 -21   0  405.26   40.40 
  -6  21   0  385.86   28.40 
   6  21   0  369.16   35.00 
  -6  21   0  355.26   45.60 
  -6  21   0  513.15   36.40 
  -6  21   0  338.57   32.20 
   6  21   0  383.66   44.50 
  -7 -21   0   76.09   28.60 
   7 -21   0   73.39   18.70 
   7 -21   0   94.09   30.20 
  -7  21   0  106.49   18.40 
   7  21   0  110.69   34.20 
  -7  21   0   51.39   16.10 
  -7  21   0  125.39   33.70 
   7  21   0   88.89   24.30 
  -7  21   0   68.09   21.90 
  -8 -21   0   10.90   28.20 
   8 -21   0   10.80   17.80 
   8 -21   0   11.60   26.90 
   8  21   0   26.00   35.00 
  -8  21   0   29.60   18.20 
   8  21   0   -7.50   22.20 
  -8  21   0   23.50   23.40 
  -8  21   0  -32.10   33.10 
  -8  21   0  -22.20   16.50 
   9 -21   0   79.59   21.90 
   9 -21   0   62.59   33.80 
  -9 -21   0   84.09   37.00 
   9  21   0   42.40   27.00 
  -9  21   0  -24.50   36.30 
   9  21   0   75.39   37.60 
  -9  21   0   47.60   28.70 
  10 -21   0  128.69   24.60 
 -10 -21   0  157.98   42.70 
  10 -21   0  119.59   38.00 
 -10  21   0  112.69   34.20 
 -10  21   0  140.79   43.20 
  10  21   0  106.09   48.10 
  10  21   0  143.39   36.80 
   0 -22   0 2209.78   76.49 
   0  22   0 2269.17   80.69 
   0  22   0 2039.10   75.59 
   0  22   0 2252.97   77.19 
   0  22   0 2496.25   88.69 
   0  22   0 2216.48   76.09 
  -1 -22   0  567.64   32.80 
   1 -22   0  589.24   30.00 
  -1  22   0  592.44   28.90 
  -1  22   0  591.94   35.80 
  -1  22   0  582.94   31.80 
   1  22   0  623.84   24.30 
   1  22   0  618.84   30.50 
   1  22   0  589.24   33.50 
  -1  22   0  566.94   39.10 
   1  22   0  651.43   32.30 
  -1  22   0  642.24   31.90 
   1  22   0  581.64   35.90 
  -2 -22   0    5.00   14.60 
   2 -22   0   13.60   14.00 
  -2 -22   0   23.10   13.40 
   2 -22   0   31.50   13.30 
  -2  22   0   20.10   14.40 
  -2  22   0   37.10   11.30 
  -2  22   0   23.60   16.70 
   2  22   0    9.40   11.80 
   2  22   0   34.70   18.60 
   2  22   0   24.30   14.90 
  -2  22   0   22.20   15.70 
   2  22   0   29.60   13.30 
  -3 -22   0  937.81   45.00 
   3 -22   0  908.21   41.80 
  -3 -22   0  839.62   42.20 
   3  22   0  882.11   43.30 
   3  22   0  942.71   41.40 
   3  22   0  870.41   47.20 
   3  22   0  911.01   42.70 
  -3  22   0  815.22   41.70 
  -3  22   0  873.71   38.80 
  -3  22   0  880.21   36.90 
  -3  22   0  894.41   46.20 
   4 -22   0 1267.67   57.09 
   4 -22   0 1312.87   52.39 
  -4 -22   0 1254.77   55.69 
  -4 -22   0 1194.18   55.99 
  -4  22   0 1219.68   53.39 
  -4  22   0 1211.28   59.19 
  -4  22   0 1259.27   49.70 
  -4  22   0 1229.18   47.30 
   4  22   0 1215.58   51.99 
   4  22   0 1208.48   53.39 
   4  22   0 1238.08   60.59 
  -4  22   0 1263.17   53.99 
   4  22   0 1191.78   55.39 
   5 -22   0  822.32   41.60 
  -5 -22   0  806.62   49.10 
   5 -22   0  899.31   48.40 
   5  22   0  817.42   55.39 
   5  22   0  844.32   46.10 
  -5  22   0  808.72   40.10 
  -5  22   0  817.42   37.30 
  -5  22   0  843.42   39.90 
  -5  22   0  816.22   51.49 
  -5  22   0  761.62   44.50 
  -6 -22   0   10.60   22.90 
   6 -22   0    6.40   15.40 
   6 -22   0    8.00   22.60 
   6  22   0    5.90   19.90 
  -6  22   0  -20.60   15.90 
  -6  22   0    1.80   14.50 
  -6  22   0   29.30   27.30 
   6  22   0   13.30   32.10 
   7 -22   0  707.23   40.10 
  -7 -22   0  660.93   53.29 
   7 -22   0  664.63   50.69 
  -7  22   0  620.84   37.60 
  -7  22   0  696.83   38.60 
  -7  22   0  650.43   42.00 
   7  22   0  656.13   58.99 
  -7  22   0  727.53   58.69 
   7  22   0  650.43   45.00 
   8 -22   0 1023.80   49.20 
   8 -22   0  918.81   64.69 
  -8 -22   0 1031.90   66.19 
  -8  22   0  936.31   48.10 
   8  22   0  925.11   69.39 
   8  22   0 1068.69   55.39 
  -8  22   0  987.70   49.99 
  -8  22   0  974.50   69.99 
  -8  22   0  984.70   56.09 
   9 -22   0  157.98   25.30 
   9 -22   0  127.69   37.30 
  -9 -22   0   97.49   35.80 
  -9  22   0  117.69   37.90 
   9  22   0  156.68   42.40 
  -9  22   0  119.29   30.60 
   9  22   0   56.29   30.10 
  10 -22   0  157.08   25.70 
  10 -22   0  128.29   38.80 
 -10 -22   0  231.88   45.90 
 -10  22   0  159.68   47.10 
  10  22   0  153.18   34.30 
  10  22   0  155.48   49.50 
 -10  22   0  114.09   36.60 
   0 -23   0   -9.30   11.70 
   0  23   0   25.20   16.20 
   0  23   0    6.30   10.70 
   0  23   0   -5.30   12.60 
   0  23   0   17.70   10.20 
   0  23   0    7.20   12.40 
   0  23   0    5.00   12.90 
  -1 -23   0  505.35   30.90 
   1 -23   0  484.55   29.00 
  -1  23   0  493.55   29.40 
   1  23   0  465.65   21.40 
   1  23   0  494.25   35.60 
   1  23   0  468.95   31.70 
  -1  23   0  450.25   33.00 
  -1  23   0  497.65   27.20 
   1  23   0  518.65   33.00 
   1  23   0  457.75   29.00 
  -1  23   0  427.36   29.80 
  -1  23   0  558.04   29.30 
   2 -23   0  898.11   42.60 
   2 -23   0  925.61   40.90 
  -2 -23   0  942.41   43.90 
  -2 -23   0  921.71   44.30 
   2  23   0  904.01   43.30 
   2  23   0  933.61   42.70 
  -2  23   0  999.00   39.70 
   2  23   0  896.31   48.20 
  -2  23   0  937.11   40.50 
  -2  23   0 1056.49   45.00 
   2  23   0  933.41   41.30 
  -2  23   0  940.91   46.30 
  -2  23   0  963.00   44.80 
  -3 -23   0 1026.50   49.40 
   3 -23   0 1030.30   46.60 
  -3 -23   0 1065.49   48.40 
  -3  23   0 1042.50   51.29 
   3  23   0  976.90   46.20 
   3  23   0 1045.10   48.10 
  -3  23   0 1049.70   44.50 
  -3  23   0 1145.49   42.50 
   3  23   0 1071.19   54.09 
   3  23   0 1101.99   49.20 
  -3  23   0 1081.29   44.80 
  -3  23   0 1085.09   49.40 
  -4 -23   0   41.60   21.50 
   4 -23   0   66.89   17.20 
   4 -23   0   63.09   20.60 
  -4  23   0   21.90   23.30 
  -4  23   0   67.99   13.60 
  -4  23   0   85.99   18.60 
   4  23   0   59.49   19.80 
   4  23   0   33.90   14.80 
   4  23   0   40.20   23.30 
  -4  23   0   41.40   14.70 
  -4  23   0   73.89   16.70 
  -5 -23   0  817.52   48.40 
   5 -23   0  717.33   40.20 
   5 -23   0  772.22   48.00 
   5  23   0  808.32   45.20 
  -5  23   0  725.33   52.79 
   5  23   0  807.32   54.29 
  -5  23   0  769.62   36.10 
  -5  23   0  735.23   39.60 
  -5  23   0  692.73   38.70 
   6 -23   0  828.12   51.69 
  -6 -23   0  728.43   53.09 
   6 -23   0  864.31   43.50 
  -6  23   0  812.82   43.30 
  -6  23   0  818.02   41.40 
  -6  23   0  825.42   41.40 
   6  23   0  835.12   49.00 
   6  23   0  822.52   62.89 
  -6  23   0  853.91   56.79 
  -7 -23   0  165.78   33.10 
   7 -23   0  115.19   30.90 
   7 -23   0  121.99   22.00 
  -7  23   0   92.59   32.50 
  -7  23   0  167.18   21.00 
   7  23   0   92.99   36.90 
  -7  23   0  140.99   19.30 
   7  23   0  142.19   26.70 
  -7  23   0  168.58   24.80 
   8 -23   0  148.79   23.40 
   8 -23   0   99.59   31.70 
  -8 -23   0  108.29   33.00 
   8  23   0  105.09   28.10 
  -8  23   0   77.69   19.70 
  -8  23   0  108.99   27.40 
  -8  23   0   48.50   38.80 
   8  23   0  124.89   40.70 
  -8  23   0   76.79   20.60 
   9 -23   0  344.37   48.20 
   9 -23   0  378.66   38.60 
  -9 -23   0  322.27   46.80 
   9  23   0  288.77   48.20 
  -9  23   0  292.47   45.80 
   9  23   0  414.06   41.70 
  -9  23   0  340.17   38.00 
 -10 -23   0  359.06   54.09 
  10 -23   0  284.27   48.20 
 -10  23   0  315.27   55.89 
 -10  23   0  270.67   42.80 
  10  23   0  310.57   57.49 
  10  23   0  324.87   40.20 
   0 -24   0  299.47   25.30 
   0  24   0  318.77   23.40 
   0  24   0  307.57   25.90 
   0  24   0  290.67   24.80 
   0  24   0  301.27   27.20 
   0  24   0  320.17   32.10 
   0  24   0  251.67   22.30 
   1 -24   0   24.60   13.50 
  -1 -24   0   24.70   15.70 
   1  24   0   18.60   14.00 
  -1  24   0   26.70   15.50 
  -1  24   0    7.10   15.80 
   1  24   0    4.80   13.50 
  -1  24   0   16.40   11.70 
   1  24   0   19.80    8.60 
   1  24   0    7.30   11.80 
   1  24   0   54.99   19.30 
  -1  24   0   -1.90   12.00 
  -1  24   0   16.20   14.40 
   2 -24   0    7.60   13.10 
  -2 -24   0    5.90   15.20 
  -2 -24   0   12.70   13.90 
   2  24   0   15.20   20.00 
   2  24   0  -12.50   11.60 
  -2  24   0    8.10   17.50 
  -2  24   0   31.90   13.70 
  -2  24   0   21.00   11.70 
  -2  24   0    1.90   17.00 
  -2  24   0   14.20   15.40 
   2  24   0   43.90   14.90 
   2  24   0   53.69   17.80 
  -3 -24   0   22.70   17.10 
   3 -24   0   12.10   15.30 
  -3 -24   0   62.49   14.60 
   3  24   0    4.00   20.50 
  -3  24   0   28.50   13.00 
   3  24   0   18.70   16.20 
  -3  24   0   41.10   15.20 
  -3  24   0   18.40   14.30 
   3  24   0   10.60   13.50 
   3  24   0   34.40   18.60 
  -3  24   0   33.70   11.50 
  -3  24   0   38.20   20.60 
   4 -24   0    9.90   16.30 
   4 -24   0   -3.30   19.70 
  -4 -24   0   10.00   19.60 
  -4  24   0   38.50   23.60 
   4  24   0   30.20   18.30 
  -4  24   0   39.70   12.20 
   4  24   0   22.00   22.80 
  -4  24   0   18.80   17.00 
  -4  24   0    0.40   14.10 
  -4  24   0   27.10   15.00 
   5 -24   0   34.60   24.10 
   5 -24   0   44.40   18.70 
  -5 -24   0   31.20   23.60 
   5  24   0   44.50   21.40 
  -5  24   0   15.80   13.90 
  -5  24   0   76.39   17.50 
  -5  24   0   20.80   17.10 
  -5  24   0   44.30   25.80 
   5  24   0   58.29   27.10 
  -6 -24   0  -11.00   23.30 
   6 -24   0    5.30   24.50 
   6 -24   0    9.20   17.40 
  -6  24   0   -1.50   13.80 
  -6  24   0   -9.80   16.50 
  -6  24   0   -9.70   15.90 
  -6  24   0  -17.00   28.30 
   6  24   0   -4.70   28.90 
   6  24   0   10.30   21.30 
   7 -24   0   39.40   25.60 
   7 -24   0   35.30   19.90 
  -7 -24   0   -5.10   29.80 
   7  24   0   29.40   39.00 
  -7  24   0   45.30   17.90 
   7  24   0   18.40   23.00 
  -7  24   0   -7.60   20.20 
  -7  24   0   11.30   31.50 
  -7  24   0   45.20   19.40 
   8 -24   0  113.89   43.70 
  -8 -24   0  152.48   35.60 
   8 -24   0  114.39   32.70 
  -8  24   0   36.50   38.50 
  -8  24   0  105.09   27.80 
   8  24   0   61.29   26.00 
  -8  24   0  173.38   24.30 
  -8  24   0   90.09   23.10 
   8  24   0  102.79   41.20 
   9 -24   0   -9.70   22.10 
   9 -24   0   51.29   33.10 
  -9 -24   0   14.50   37.60 
  -9  24   0   20.50   40.20 
   9  24   0   17.00   32.90 
  -9  24   0   52.29   30.10 
   9  24   0   26.10   43.00 
   0 -25   0   -1.60   14.70 
   0  25   0   29.70   17.90 
   0  25   0    7.70   14.90 
   0  25   0   33.10   16.10 
   0  25   0    8.20   12.30 
   0  25   0   -4.60   12.60 
   1 -25   0  763.02   38.40 
  -1 -25   0  744.63   39.10 
   1  25   0  836.62   38.30 
   1  25   0  803.82   44.40 
  -1  25   0  794.32   44.70 
   1  25   0  750.42   38.00 
   1  25   0  727.73   39.60 
   1  25   0  795.82   30.80 
  -1  25   0  784.92   39.00 
  -1  25   0  800.52   38.70 
  -1  25   0  804.12   36.80 
  -2 -25   0  652.53   38.50 
  -2 -25   0  703.23   39.70 
   2 -25   0  694.13   36.40 
   2  25   0  628.74   44.40 
   2  25   0  720.43   36.70 
   2  25   0  700.43   37.10 
   2  25   0  671.43   38.50 
  -2  25   0  652.73   33.00 
  -2  25   0  674.53   42.90 
  -2  25   0  707.53   40.20 
  -2  25   0  704.93   35.40 
  -2  25   0  706.83   39.60 
   3 -25   0   86.29   18.50 
  -3 -25   0  109.99   22.70 
  -3  25   0   65.49   15.70 
   3  25   0  102.59   22.20 
  -3  25   0   93.69   20.80 
   3  25   0   88.09   18.50 
  -3  25   0  102.69   24.60 
   3  25   0  112.49   26.80 
  -3  25   0   97.89   15.50 
  -3  25   0   94.29   17.60 
   4 -25   0  -23.60   17.80 
  -4 -25   0    2.90   19.80 
   4 -25   0   14.90   17.50 
   4  25   0    1.30   24.40 
  -4  25   0    0.80   14.00 
   4  25   0   -8.10   16.80 
  -4  25   0    4.10   15.10 
  -4  25   0   -0.20   23.10 
  -4  25   0    6.00   12.00 
  -4  25   0   27.70   20.50 
   5 -25   0  341.27   33.20 
   5 -25   0  376.76   41.60 
  -5 -25   0  310.47   39.40 
   5  25   0  389.16   37.60 
   5  25   0  428.76   48.90 
  -5  25   0  419.26   33.50 
  -5  25   0  344.37   30.80 
  -5  25   0  400.76   42.80 
  -6 -25   0  555.84   47.30 
   6 -25   0  442.06   37.70 
   6 -25   0  529.85   47.20 
   6  25   0  548.35   55.19 
   6  25   0  551.24   42.80 
  -6  25   0  531.55   36.10 
  -6  25   0  522.25   52.69 
  -6  25   0  496.25   32.40 
  -6  25   0  403.76   35.00 
   7 -25   0  185.58   26.10 
  -7 -25   0  168.68   37.00 
   7 -25   0  196.88   35.20 
   7  25   0  179.38   29.00 
  -7  25   0  311.97   31.40 
   7  25   0  162.18   40.10 
  -7  25   0  171.18   47.90 
  -7  25   0  203.58   27.50 
  -7  25   0  228.88   26.40 
   8 -25   0   21.50   21.10 
   8 -25   0   26.40   31.30 
  -8 -25   0   48.20   35.10 
  -8  25   0   37.20   25.10 
  -8  25   0   70.59   25.00 
  -8  25   0   15.10   35.10 
  -8  25   0   38.70   26.90 
   8  25   0   57.49   26.30 
   8  25   0   71.99   37.50 
   9 -25   0  351.36   39.50 
   9 -25   0  401.16   49.60 
  -9 -25   0  332.87   47.90 
   9  25   0  341.27   41.40 
   9  25   0  341.97   56.69 
  -9  25   0  291.07   50.59 
  -9  25   0  355.76   40.10 
   0 -26   0 2785.22   96.39 
   0  26   0 2854.91   90.79 
   0  26   0 2896.61  101.49 
   0  26   0 2643.64   97.99 
   0  26   0 2925.41   95.89 
   0  26   0 2737.13   95.49 
   0  26   0 2843.82   97.69 
  -1 -26   0  396.46   31.50 
   1 -26   0  386.66   28.50 
  -1  26   0  392.76   37.30 
   1  26   0  425.36   36.70 
   1  26   0  430.26   28.40 
   1  26   0  363.66   29.20 
  -1  26   0  356.26   31.40 
   1  26   0  345.87   31.60 
   1  26   0  413.56   21.90 
  -1  26   0  386.86   30.30 
  -1  26   0  391.36   29.70 
  -2 -26   0   31.20   14.30 
   2 -26   0   -6.60   13.80 
  -2 -26   0   16.90   19.10 
   2  26   0   46.60   15.70 
   2  26   0    8.30   18.10 
  -2  26   0    1.70   11.70 
  -2  26   0   43.70   14.10 
  -2  26   0   12.60   14.50 
   2  26   0   19.90   21.50 
  -2  26   0   10.40   20.00 
  -2  26   0   33.70   17.80 
   3 -26   0  992.50   47.70 
  -3 -26   0  946.01   50.79 
   3  26   0  967.90   49.60 
  -3  26   0  972.90   44.70 
   3  26   0 1010.70   55.89 
  -3  26   0  965.20   45.70 
  -3  26   0  966.90   42.70 
  -3  26   0  974.50   51.89 
  -3  26   0  958.00   52.39 
   4 -26   0 2616.74   90.19 
  -4 -26   0 2530.05   93.89 
  -4  26   0 2512.65   87.19 
   4  26   0 2423.76   98.49 
   4  26   0 2529.25   92.49 
  -4  26   0 2593.04   98.29 
  -4  26   0 2432.16   88.29 
  -4  26   0 2460.55   90.99 
   5 -26   0 1314.57   57.99 
   5 -26   0 1201.28   62.79 
  -5 -26   0 1195.88   62.39 
  -5  26   0 1215.18   54.59 
  -5  26   0 1341.27   51.89 
  -5  26   0 1254.17   54.69 
  -5  26   0 1275.17   67.39 
   5  26   0 1274.57   59.59 
   5  26   0 1223.58   69.89 
  -6 -26   0   56.99   26.40 
   6 -26   0   49.80   21.20 
   6 -26   0   62.39   28.70 
  -6  26   0    5.60   19.30 
  -6  26   0   63.09   18.10 
   6  26   0   69.39   24.10 
  -6  26   0  109.39   21.30 
   6  26   0   94.09   32.20 
  -6  26   0   45.30   30.60 
  -7 -26   0  560.94   51.89 
   7 -26   0  546.25   53.59 
   7 -26   0  520.75   41.80 
  -7  26   0  465.05   41.00 
  -7  26   0  615.04   49.99 
  -7  26   0  596.74   38.00 
  -7  26   0  467.35   54.99 
   7  26   0  540.25   45.60 
   7  26   0  527.65   61.89 
   8 -26   0  710.33   47.80 
  -8 -26   0  820.92   64.59 
   8 -26   0  723.93   60.09 
   8  26   0  747.83   72.19 
  -8  26   0  837.52   69.39 
  -8  26   0  865.91   51.99 
   9 -26   0  147.19   40.50 
  -9 -26   0  143.29   39.30 
   9 -26   0  129.39   26.50 
   9  26   0  177.78   36.80 
  -9  26   0  213.08   45.90 
  -9  26   0  146.89   35.00 
   9  26   0  198.38   50.69 
   0 -27   0   20.60   16.70 
   0  27   0   -3.40   17.20 
   0  27   0   23.60   21.00 
   0  27   0   31.40   15.00 
   0  27   0   30.10   17.30 
   0  27   0   36.30   12.60 
  -1 -27   0  495.75   35.70 
   1 -27   0  475.35   32.80 
   1  27   0  487.35   35.70 
  -1  27   0  472.15   38.50 
  -1  27   0  452.05   35.40 
  -1  27   0  462.45   32.00 
  -1  27   0  421.26   29.90 
   1  27   0  499.05   40.30 
   1  27   0  503.05   24.40 
  -1  27   0  466.55   32.50 
   1  27   0  493.75   31.50 
  -2 -27   0  661.63   41.40 
   2 -27   0  704.53   37.70 
  -2  27   0  734.23   42.10 
  -2  27   0  648.64   40.20 
  -2  27   0  686.43   45.80 
  -2  27   0  671.33   36.40 
  -2  27   0  658.43   36.50 
   2  27   0  712.13   39.80 
   2  27   0  605.54   41.20 
   2  27   0  672.53   46.10 
  -3 -27   0  579.04   41.40 
  -3  27   0  531.75   34.60 
  -3  27   0  452.65   34.90 
  -3  27   0  551.94   40.70 
  -3  27   0  500.25   33.20 
   3  27   0  464.35   43.80 
  -3  27   0  548.55   42.80 
  -4 -27   0   29.10   21.50 
   4 -27   0    8.10   18.30 
   4  27   0    4.70   19.80 
  -4  27   0   23.70   13.70 
  -4  27   0   -1.20   24.00 
   4  27   0   20.80   26.60 
  -4  27   0   -3.70   15.30 
  -4  27   0  -26.00   16.80 
  -5 -27   0  705.83   49.10 
   5 -27   0  634.74   43.30 
   5 -27   0  634.64   50.29 
  -5  27   0  702.03   40.80 
  -5  27   0  941.21   54.39 
   5  27   0  746.43   47.30 
  -5  27   0  671.53   53.99 
  -5  27   0  817.02   36.90 
   5  27   0  657.23   56.99 
   6 -27   0  590.84   51.19 
   6 -27   0  584.34   44.40 
  -6 -27   0  582.84   52.79 
   6  27   0  614.64   47.60 
  -6  27   0  637.34   37.30 
   6  27   0  556.84   56.99 
  -6  27   0  523.15   56.39 
  -6  27   0  527.75   39.60 
   7 -27   0  162.68   36.80 
   7 -27   0   84.89   25.00 
  -7 -27   0  113.49   34.70 
  -7  27   0   83.39   21.00 
  -7  27   0   83.79   24.00 
   7  27   0   50.59   36.70 
  -7  27   0   99.29   37.50 
   7  27   0  120.29   29.20 
  -8 -27   0  -20.50   33.30 
   8 -27   0   55.59   31.70 
   8 -27   0   14.50   23.90 
   8  27   0   55.49   41.00 
  -8  27   0   41.40   40.30 
  -8  27   0   63.89   25.70 
   8  27   0   14.30   25.80 
  -9 -27   0  343.67   49.40 
   9 -27   0  189.38   29.80 
   9 -27   0  258.67   45.90 
   9  27   0  207.88   53.19 
   9  27   0  265.47   41.30 
  -9  27   0  208.48   50.29 
  -9  27   0  323.47   40.00 
   0 -28   0   30.10   16.50 
   0  28   0   17.90   19.40 
   0  28   0   16.90   21.40 
   0  28   0   12.60   13.80 
   0  28   0   11.20   15.10 
  -1 -28   0   22.10   17.90 
   1 -28   0    8.90   16.50 
   1  28   0   25.20   18.80 
  -1  28   0   22.10   18.40 
  -1  28   0   22.80   20.20 
   1  28   0   17.60   10.00 
   1  28   0   44.50   22.40 
   1  28   0  -16.30   14.80 
  -1  28   0   41.70   17.30 
  -1  28   0   37.00   14.10 
  -2 -28   0   94.19   21.40 
   2 -28   0  107.79   19.30 
   2  28   0   78.29   21.50 
   2  28   0  127.59   27.70 
  -2  28   0  132.49   23.50 
  -2  28   0  133.99   26.10 
  -2  28   0  115.29   17.60 
  -3 -28   0    4.60   19.50 
   3  28   0    9.20   24.00 
  -3  28   0   17.20   22.70 
  -3  28   0  -13.10   13.10 
   3  28   0    5.30   21.60 
  -3  28   0   -8.60   15.60 
  -3  28   0    7.70   20.90 
   4 -28   0   67.89   20.70 
  -4 -28   0   61.59   23.20 
   4  28   0   56.19   27.60 
   4  28   0   46.40   23.00 
  -4  28   0   47.30   17.30 
  -4  28   0   63.49   15.30 
  -4  28   0   58.89   26.90 
  -5 -28   0   48.30   25.70 
   5 -28   0    7.00   19.90 
   5 -28   0   34.70   25.80 
  -5  28   0   39.40   18.00 
  -5  28   0   12.30   29.70 
   5  28   0   -9.20   28.30 
  -5  28   0   15.50   14.40 
   5  28   0   31.20   23.60 
   6 -28   0  -18.50   25.10 
   6 -28   0   -9.50   20.30 
  -6  28   0   -1.60   30.50 
   6  28   0   -0.60   24.00 
  -6  28   0   -2.90   17.40 
  -6  28   0  -11.50   18.80 
   6  28   0   10.40   53.89 
   7 -28   0   28.90   24.30 
  -7 -28   0  -47.90   27.30 
  -7  28   0   14.20   38.80 
   7  28   0   23.20   27.70 
  -7  28   0   26.70   22.50 
  -7  28   0   72.99   20.80 
   7  28   0   15.20   36.10 
   8 -28   0    7.40   23.10 
   8 -28   0   27.00   32.80 
  -8 -28   0  -16.30   36.50 
  -8  28   0    1.00   24.50 
  -8  28   0   49.20   41.60 
   8  28   0   63.89   41.50 
   8  28   0   28.30   27.70 
   0 -29   0    9.70   18.00 
   0  29   0   19.40   18.00 
   0  29   0   20.80   15.20 
   0  29   0   51.29   16.60 
   0  29   0    7.10   23.30 
   1 -29   0  832.92   43.10 
  -1 -29   0  897.21   48.20 
   1  29   0  799.32   42.70 
  -1  29   0  907.61   43.70 
  -1  29   0  870.11   45.90 
   1  29   0  882.51   34.30 
  -1  29   0  916.61   51.79 
  -1  29   0  803.62   42.00 
   1  29   0  873.11   52.59 
   1  29   0  840.92   47.50 
   2 -29   0  794.72   42.70 
  -2 -29   0  791.02   45.70 
   2  29   0  871.91   47.60 
  -2  29   0  828.12   41.00 
   2  29   0  784.12   52.19 
  -2  29   0  839.62   46.40 
  -2  29   0  825.72   51.19 
  -3 -29   0  123.69   27.30 
  -3  29   0   86.89   27.20 
  -3  29   0  117.49   17.00 
   3  29   0   91.19   23.30 
  -3  29   0  119.49   20.30 
   3  29   0  103.29   27.90 
  -3  29   0  118.79   27.50 
  -4 -29   0   30.70   24.90 
   4  29   0   40.80   28.40 
  -4  29   0   37.00   19.40 
   4  29   0    7.10   22.40 
  -4  29   0   45.70   16.10 
  -4  29   0   76.59   27.50 
   5 -29   0  328.87   35.70 
  -5 -29   0  421.56   43.30 
   5  29   0  415.26   46.70 
  -5  29   0  383.86   35.20 
  -5  29   0  336.07   30.00 
  -5  29   0  387.46   49.00 
   5  29   0  403.16   41.60 
   6 -29   0  425.86   49.10 
  -6 -29   0  536.45   49.70 
   6 -29   0  448.96   42.10 
  -6  29   0  454.35   55.99 
  -6  29   0  570.74   34.60 
  -6  29   0  451.45   37.90 
   6  29   0  462.75   60.69 
   6  29   0  479.65   53.89 
   7 -29   0  307.57   42.50 
  -7 -29   0  297.57   40.70 
   7 -29   0  281.97   32.40 
  -7  29   0  300.87   38.60 
  -7  29   0  246.18   44.40 
   7  29   0  293.37   38.00 
   7  29   0  208.88   46.20 
   8 -29   0   36.00   34.70 
  -8 -29   0  -27.80   34.10 
   8 -29   0   45.70   24.50 
   8  29   0   72.09   32.90 
  -8  29   0   39.60   37.90 
   8  29   0  -11.70   41.40 
  -8  29   0  -20.60   27.80 
   0 -30   0 2205.68   81.89 
   0  30   0 2092.89   81.59 
   0  30   0 2209.88   87.79 
   0  30   0 2158.28   74.39 
   0  30   0 2115.49   79.59 
  -1 -30   0  698.83   42.70 
   1 -30   0  733.93   40.70 
  -1  30   0  683.23   43.00 
   1  30   0  677.83   51.19 
  -1  30   0  687.33   49.00 
  -1  30   0  742.83   40.40 
  -1  30   0  670.93   38.90 
   1  30   0  715.63   30.40 
   1  30   0  747.83   45.40 
  -2 -30   0   21.20   21.40 
   2 -30   0  -11.50   16.00 
  -2  30   0   -5.40   22.30 
  -2  30   0  -15.40   19.50 
   2  30   0   11.70   21.30 
  -2  30   0   18.50   14.40 
   2  30   0   16.20   24.20 
  -3 -30   0  553.14   43.30 
  -3  30   0  528.55   33.40 
  -3  30   0  533.85   45.60 
  -3  30   0  491.55   35.90 
   3  30   0  533.65   49.00 
  -3  30   0  519.65   44.80 
   3  30   0  526.15   43.00 
  -4 -30   0 1505.85   68.99 
  -4  30   0 1427.16   60.29 
   4  30   0 1455.65   74.89 
  -4  30   0 1325.07   68.69 
  -4  30   0 1414.16   56.79 
  -4  30   0 1340.77   70.89 
   4  30   0 1394.56   66.79 
  -5 -30   0  533.35   49.00 
  -5  30   0  543.15   39.10 
   5  30   0  470.35   63.09 
  -5  30   0  457.15   50.59 
   5  30   0  549.65   45.90 
  -5  30   0  546.95   35.60 
  -6 -30   0  208.68   32.70 
   6 -30   0  181.98   28.70 
   6 -30   0  154.38   34.10 
  -6  30   0  189.98   27.00 
   6  30   0  147.39   40.90 
  -6  30   0  128.39   22.50 
   6  30   0  198.08   33.50 
   7 -30   0  724.13   58.39 
  -7 -30   0  717.63   62.29 
   7 -30   0  770.92   49.80 
  -7  30   0  720.33   48.70 
  -7  30   0  695.03   68.09 
   7  30   0  640.04   55.89 
   7  30   0  668.43   70.09 
   8 -30   0  468.15   53.19 
   8 -30   0  417.76   45.30 
  -8 -30   0  495.95   63.09 
   8  30   0  458.45   60.99 
  -8  30   0  409.66   50.39 
   8  30   0  482.45   54.09 
  -8  30   0  493.05   61.09 
   0 -31   0   21.10   19.10 
   0  31   0   12.60   19.10 
   0  31   0   11.90   14.90 
   0  31   0   18.70   22.00 
   0  31   0   23.80   23.30 
   1 -31   0  200.78   25.10 
  -1 -31   0  109.39   23.40 
   1  31   0  133.79   29.10 
   1  31   0  124.19   24.40 
  -1  31   0  144.89   25.90 
  -1  31   0  161.58   22.10 
   1  31   0  151.68   15.20 
  -1  31   0  160.88   22.70 
  -1  31   0  185.98   32.00 
   2 -31   0  274.67   32.20 
  -2 -31   0  376.66   37.40 
   2  31   0  320.37   43.90 
  -2  31   0  345.07   42.40 
  -2  31   0  380.56   31.20 
  -2  31   0  309.97   34.90 
   2  31   0  340.47   38.60 
  -3 -31   0    7.30   21.50 
  -3  31   0    5.50   23.20 
   3  31   0   20.70   28.00 
  -3  31   0  -12.00   17.50 
  -3  31   0   11.20   24.40 
  -3  31   0   45.90   15.30 
   3  31   0   32.90   22.40 
  -4 -31   0    8.50   23.80 
   4  31   0   14.50   23.90 
  -4  31   0   46.40   17.30 
  -4  31   0   24.90   26.60 
   4  31   0   18.20   29.30 
  -4  31   0   -0.30   19.60 
  -4  31   0   26.60   27.40 
  -5 -31   0  216.08   55.19 
  -5  31   0  231.58   25.20 
   5  31   0  226.58   41.20 
  -5  31   0  232.58   37.70 
  -5  31   0  263.07   28.50 
   5  31   0  181.48   38.50 
  -6 -31   0  177.28   35.90 
  -6  31   0  168.98   28.00 
   6  31   0  169.98   44.40 
  -6  31   0  180.28   39.40 
   6  31   0  201.98   34.30 
  -6  31   0  160.88   22.10 
  -7 -31   0   82.29   34.30 
   7 -31   0   71.39   33.70 
  -7  31   0   55.09   26.00 
   7  31   0   -4.30   36.90 
   7  31   0   31.80   29.30 
  -7  31   0   76.79   40.00 
   8 -31   0   11.80   33.20 
  -8 -31   0   37.30   40.50 
  -8  31   0   29.70   44.90 
   8  31   0   22.30   31.80 
  -8  31   0  -24.80   29.00 
   8  31   0  -15.30   45.90 
   0 -32   0   68.09   22.70 
   0  32   0  142.79   30.70 
   0  32   0  168.08   27.80 
   0  32   0   91.89   19.00 
   1 -32   0    7.80   19.00 
  -1 -32   0   11.30   21.20 
  -1  32   0   11.20   25.80 
  -1  32   0   41.30   20.90 
   1  32   0   13.50   21.00 
  -1  32   0   13.00   21.20 
  -1  32   0   66.49   19.60 
   1  32   0   27.70   25.00 
   1  32   0   11.60   11.70 
  -2 -32   0   18.20   20.90 
  -2  32   0   -2.20   20.60 
   2  32   0   36.30   22.80 
   2  32   0    6.50   27.50 
  -2  32   0   30.50   22.30 
  -2  32   0   22.00   25.20 
  -3 -32   0  105.49   27.70 
   3  32   0  153.28   28.60 
   3  32   0   95.29   32.70 
  -3  32   0  102.19   32.50 
  -3  32   0  101.39   26.20 
  -3  32   0  107.89   22.00 
  -4 -32   0  196.38   32.60 
   4  32   0  136.29   37.90 
  -4  32   0  188.58   23.20 
  -4  32   0  141.79   24.70 
  -4  32   0  160.68   33.90 
  -4  32   0  171.58   33.70 
  -5 -32   0  -14.30   28.40 
  -5  32   0   19.10   33.00 
   5  32   0   -1.20   35.80 
  -5  32   0   25.70   21.30 
   5  32   0   21.60   25.00 
  -5  32   0   42.90   20.50 
  -6 -32   0   45.60   32.10 
  -6  32   0  -32.40   22.00 
  -6  32   0  -14.90   35.30 
   6  32   0   35.50   29.10 
   6  32   0  -16.80   39.50 
  -7 -32   0  144.49   36.20 
   7 -32   0  159.08   36.60 
   7  32   0   96.79   48.10 
  -7  32   0  122.89   44.80 
  -7  32   0   97.69   29.90 
   7  32   0   98.49   34.80 
   0 -33   0   -4.20   20.90 
   0  33   0   15.50   17.00 
   0  33   0  -12.50   26.30 
   0  33   0    7.30   19.10 
   1 -33   0  762.02   45.50 
  -1 -33   0  685.63   48.50 
   1  33   0  743.53   49.60 
   1  33   0  685.63   37.90 
   1  33   0  723.43   55.99 
  -1  33   0  722.43   43.50 
  -1  33   0  805.52   48.60 
  -1  33   0  724.73   55.99 
  -2 -33   0 1169.78   60.09 
  -2  33   0 1134.99   64.69 
   2  33   0 1174.18   60.19 
   2  33   0 1084.99   65.89 
  -2  33   0 1168.38   58.99 
  -2  33   0 1084.59   57.69 
  -3 -33   0  284.27   34.90 
  -3  33   0  348.97   36.60 
  -3  33   0  294.27   38.40 
   3  33   0  290.97   39.00 
  -3  33   0  325.17   34.50 
  -3  33   0  346.27   34.00 
  -4 -33   0    8.80   29.80 
   4  33   0   74.69   34.00 
  -4  33   0   20.20   28.50 
  -4  33   0   73.49   30.50 
  -4  33   0   67.09   24.00 
   4  33   0   29.20   24.90 
  -4  33   0    6.10   22.10 
  -5 -33   0  549.45   53.09 
   5  33   0  568.04   49.70 
   5  33   0  472.75   62.89 
  -5  33   0  542.75   42.30 
  -5  33   0  484.35   49.40 
  -6 -33   0  637.34   61.19 
  -6  33   0  750.62   49.40 
   6  33   0  769.62   58.79 
  -6  33   0  648.14   65.49 
   6  33   0  750.92   72.39 
  -7 -33   0  189.28   42.00 
  -7  33   0  187.78   44.60 
  -7  33   0  194.98   33.80 
   7  33   0  129.49   46.80 
   7  33   0  165.68   39.90 
   0 -34   0 1153.68   55.09 
   0  34   0 1073.89   57.69 
   0  34   0  954.90   47.20 
   0  34   0 1014.50   63.29 
  -1 -34   0  845.12   50.69 
   1 -34   0  812.32   48.10 
  -1  34   0  778.22   57.09 
   1  34   0  822.92   59.29 
  -1  34   0  744.73   45.00 
   1  34   0  808.42   51.59 
  -1  34   0  813.62   50.79 
  -2 -34   0  -13.40   23.10 
  -2  34   0   19.50   22.60 
  -2  34   0   30.60   28.90 
   2  34   0   15.20   29.10 
  -2  34   0    4.00   21.60 
  -3 -34   0  507.05   48.80 
   3  34   0  503.35   46.30 
  -3  34   0  421.26   46.20 
  -3  34   0  441.16   39.90 
  -3  34   0  532.25   44.00 
  -3  34   0  498.95   51.79 
  -4 -34   0  819.62   55.69 
  -4  34   0  761.62   47.90 
  -4  34   0  848.42   55.99 
   4  34   0  811.62   56.19 
  -4  34   0  755.52   62.59 
   4  34   0  800.62   65.19 
  -5 -34   0  323.17   42.40 
  -5  34   0  328.47   34.20 
  -5  34   0  321.27   44.20 
  -5  34   0  253.37   42.40 
   5  34   0  270.47   48.20 
   5  34   0  360.36   41.70 
  -6 -34   0  110.19   38.30 
  -6  34   0   58.19   26.70 
  -6  34   0   82.09   39.40 
   6  34   0   65.89   43.40 
   6  34   0  122.99   34.00 
  -7 -34   0  428.96   51.59 
  -7  34   0  369.96   48.20 
   7  34   0  491.15   51.59 
  -7  34   0  545.15   61.89 
   7  34   0  472.45   64.89 
   0 -35   0    4.60   21.60 
   0  35   0    1.80   18.40 
   0  35   0   27.10   29.40 
  -1 -35   0  156.98   29.30 
   1 -35   0  140.59   28.90 
   1  35   0  127.39   34.10 
  -1  35   0  129.19   30.20 
  -1  35   0  102.59   23.80 
   1  35   0  178.08   32.00 
  -1  35   0  164.58   35.40 
  -2 -35   0   97.09   28.30 
  -2  35   0  145.99   27.70 
   2  35   0   86.69   28.50 
  -2  35   0  109.69   33.00 
  -2  35   0   84.19   26.80 
  -3 -35   0   28.50   27.40 
  -3  35   0   71.39   22.80 
  -3  35   0   10.30   27.80 
  -3  35   0   17.20   30.00 
   3  35   0  -24.40   31.50 
   3  35   0   28.10   27.00 
  -3  35   0   37.10   24.60 
  -4 -35   0   20.40   28.20 
  -4  35   0  -17.30   21.40 
   4  35   0   16.70   26.40 
  -4  35   0   29.40   32.30 
   4  35   0   33.50   34.00 
  -4  35   0  -44.30   28.00 
  -5 -35   0   67.39   31.10 
  -5  35   0   19.70   42.40 
  -5  35   0   25.90   34.40 
  -5  35   0   42.80   24.90 
   5  35   0   12.10   28.30 
   5  35   0   36.90   39.90 
  -6 -35   0   88.09   39.10 
   6  35   0   92.69   34.00 
  -6  35   0   52.19   28.30 
  -6  35   0  105.69   40.90 
   6  35   0  112.19   49.20 
  -6  35   0   62.59   41.00 
   0 -36   0  626.54   46.30 
   0  36   0  647.54   39.20 
   0  36   0  630.54   61.79 
   0  36   0  673.03   50.89 
   1 -36   0  146.69   27.80 
  -1 -36   0  270.77   34.10 
  -1  36   0  217.78   31.30 
  -1  36   0  218.18   41.10 
  -1  36   0  215.38   28.30 
   1  36   0  272.67   34.70 
  -2 -36   0   17.10   24.60 
   2  36   0   27.30   26.90 
  -2  36   0  115.79   52.69 
  -2  36   0   38.20   24.30 
   2  36   0   52.19   34.30 
  -2  36   0   74.79   27.10 
  -3 -36   0  240.18   37.70 
  -3  36   0  299.47   35.60 
  -3  36   0  247.28   35.60 
   3  36   0  249.18   43.20 
  -3  36   0  214.18   38.40 
   3  36   0  363.76   41.50 
  -3  36   0  314.17   39.70 
  -4 -36   0  175.38   34.40 
   4  36   0  209.78   41.80 
   4  36   0  229.58   38.60 
  -4  36   0  210.78   37.10 
  -4  36   0  179.78   29.80 
  -4  36   0  203.28   39.50 
  -4  36   0  209.38   32.30 
  -5 -36   0   14.10   30.80 
   5  36   0   51.59   32.40 
  -5  36   0   20.50   36.10 
  -5  36   0   63.39   38.50 
  -5  36   0   19.90   26.70 
   5  36   0   87.19   45.10 
  -6 -36   0    1.20   36.20 
   6  36   0   51.29   46.90 
  -6  36   0   -2.60   27.70 
   6  36   0   -8.60   33.80 
  -6  36   0  -41.50   40.20 
  -6  36   0  -29.80   37.30 
   0 -37   0   34.60   24.90 
   0  37   0   45.70   33.10 
   0  37   0    3.80   19.40 
   0  37   0   31.80   25.80 
   1 -37   0  487.65   45.20 
  -1 -37   0  586.34   49.90 
   1  37   0  553.34   50.19 
  -1  37   0  573.24   60.29 
  -1  37   0  606.74   49.70 
  -1  37   0  534.95   43.70 
   1  37   0  536.45   56.49 
  -2 -37   0 1072.59   86.49 
  -2  37   0 1047.90   69.49 
  -2  37   0 1011.40   60.09 
  -2  37   0  939.41   57.59 
   2  37   0 1044.00   62.49 
   2  37   0  963.20   71.19 
  -3 -37   0  650.73   54.19 
  -3  37   0  593.74   50.19 
  -3  37   0  689.93   53.49 
   3  37   0  638.94   57.49 
   3  37   0  552.44   61.79 
  -3  37   0  587.74   58.49 
  -3  37   0  625.74   46.80 
  -4 -37   0   78.69   32.50 
  -4  37   0   96.09   33.90 
  -4  37   0  102.79   40.30 
  -4  37   0   17.30   26.00 
   4  37   0   82.29   40.40 
   4  37   0   65.09   33.10 
  -4  37   0   96.09   28.80 
  -5 -37   0  708.53   63.09 
  -5  37   0  663.53   51.59 
   5  37   0  536.45   73.89 
  -5  37   0  669.93   68.89 
  -5  37   0  731.43   56.09 
  -5  37   0  678.83   67.49 
   5  37   0  666.53   60.69 
   0 -38   0  752.02   53.59 
   0  38   0  709.13   42.60 
   0  38   0  758.42   63.69 
   0  38   0  665.53   55.39 
  -1 -38   0  211.58   35.10 
   1 -38   0  201.08   31.20 
  -1  38   0  272.47   30.80 
  -1  38   0  248.78   35.10 
   1  38   0  178.38   34.70 
  -1  38   0  329.07   44.00 
   1  38   0  268.27   44.00 
  -2 -38   0    7.70   28.10 
  -2  38   0   34.20   26.80 
   2  38   0   -2.40   32.40 
   2  38   0   13.50   28.00 
  -2  38   0   48.50   34.20 
  -2  38   0   26.80   29.30 
  -3 -38   0  202.48   36.10 
  -3  38   0  231.18   36.20 
  -3  38   0  237.48   35.70 
   3  38   0  185.08   44.20 
  -3  38   0  223.48   31.80 
   3  38   0  226.08   38.60 
  -3  38   0  301.07   43.90 
  -4 -38   0  567.44   57.69 
  -4  38   0  463.85   53.19 
   4  38   0  590.14   55.09 
  -4  38   0  523.15   52.89 
  -4  38   0  439.46   47.00 
  -4  38   0  451.55   46.80 
   4  38   0  482.75   65.59 
  -5 -38   0   86.29   38.80 
  -5  38   0  128.99   32.10 
  -5  38   0   68.99   31.40 
  -5  38   0   90.79   41.00 
   5  38   0   86.09   50.19 
   5  38   0  154.78   42.20 
  -5  38   0  139.59   45.20 
   0 -39   0   40.90   27.50 
   0  39   0   42.90   22.10 
   0  39   0  -16.10   34.30 
   0  39   0   27.00   27.50 
   1 -39   0    9.80   25.80 
  -1 -39   0  -16.00   35.20 
  -1  39   0   -5.10   29.90 
   1  39   0  -35.70   27.70 
  -1  39   0  -17.30   25.30 
   1  39   0   51.59   38.10 
  -1  39   0   10.50   34.20 
  -2 -39   0   -5.40   29.70 
   2  39   0   41.60   31.10 
  -2  39   0   34.20   26.60 
  -2  39   0   30.20   30.00 
   2  39   0   21.00   37.20 
  -2  39   0    7.90   35.80 
  -3 -39   0   28.10   32.50 
   3  39   0  -27.40   29.30 
  -3  39   0    1.60   26.10 
  -3  39   0  -38.40   29.90 
  -3  39   0   12.30   35.90 
   3  39   0   11.10   37.80 
  -3  39   0    5.60   30.10 
  -4 -39   0   23.60   33.10 
  -4  39   0   26.60   26.40 
   4  39   0    5.70   35.00 
   4  39   0   29.10   43.70 
  -4  39   0   88.89   31.30 
  -4  39   0   36.70   39.20 
   0  40   0  661.53   45.20 
   0  40   0  758.72   57.49 
   0  40   0  707.93   67.59 
   1 -40   0  357.56   46.10 
  -1 -40   0  329.27   40.60 
   1  40   0  242.58   39.70 
  -1  40   0  246.88   40.60 
  -1  40   0  278.97   34.60 
   1  40   0  309.27   46.80 
  -1  40   0  277.17   44.30 
  -2 -40   0  108.29   32.80 
  -2  40   0   31.20   30.70 
   2  40   0   17.40   31.90 
  -2  40   0   38.20   30.10 
  -2  40   0  -11.50   36.90 
   2  40   0   55.99   42.00 
  -3 -40   0  313.07   41.80 
  -3  40   0  307.57   47.10 
  -3  40   0  227.28   39.00 
   3  40   0  325.07   53.89 
  -3  40   0  300.67   42.00 
  -3  40   0  295.17   38.70 
   3  40   0  178.88   38.90 
   0 -41   0    9.50   28.60 
   0  41   0  -41.70   36.40 
   0  41   0    7.40   32.20 
  -1 -41   0  278.37   39.50 
  -1  41   0  252.57   33.50 
  -1  41   0  213.68   42.40 
   1  41   0  207.68   45.10 
   1  41   0  282.07   44.40 
  -1  41   0  220.48   46.90 
  -2 -41   0  751.22   63.19 
   2  41   0  655.33   68.69 
  -2  41   0  570.54   69.39 
  -2  41   0  501.95   55.19 
   2  41   0  578.54   58.79 
  -2  41   0  484.65   57.19 
   0 -42   0  233.08   38.20 
   0  42   0  267.57   48.00 
   0  42   0  197.18   41.30 
   1 -42   0   31.60   30.00 
  -1 -42   0   46.00   31.30 
   1  42   0   37.90   35.00 
   1  42   0   37.10   42.70 
  -1  42   0   65.19   34.90 
  -1  42   0   76.39   44.30 
  -1  42   0  -10.00   28.90 
  12   0  -1  -29.60   41.50 
  12   0  -1   24.80   22.80 
 -12   0   1   -5.00   35.00 
 -12   0   1   16.70   34.70 
 -11   0   1   47.80   31.70 
 -11   0   1  -10.20   32.70 
  11   0  -1   17.90   21.50 
  11   0  -1   37.20   35.60 
 -10   0   1   25.50   27.50 
  10   0  -1  -32.40   29.70 
  10   0  -1    9.70   18.60 
 -10   0   1  -28.80   25.20 
 -10   0   1    8.20   16.30 
   9   0  -1    8.40   16.50 
  -9   0   1   15.20   24.60 
  -9   0   1   14.10   23.30 
  -9   0   1  -27.20   12.60 
   9   0  -1   15.90   27.20 
   8   0  -1   -6.50   13.90 
   8   0  -1   -9.30   13.00 
  -8   0   1   20.40   21.20 
   8   0  -1   18.50   23.70 
  -8   0   1  -16.90   12.30 
  -8   0   1   -6.70   19.70 
   7   0  -1  -15.30   11.10 
  -7   0   1  -14.30   10.40 
   7   0  -1  -16.70   12.20 
  -7   0   1   10.10   17.80 
   7   0  -1   -9.50   19.60 
  -7   0   1  -13.20   17.20 
   6   0  -1    8.40   11.00 
  -6   0   1   -3.20   15.20 
  -6   0   1  -11.00   13.70 
  -6   0   1   10.60   14.60 
  -6   0   1   -7.60    8.60 
   6   0  -1  -17.60   15.00 
   6   0  -1   12.10   11.30 
   5   0  -1  -27.80   13.30 
   5   0  -1  -12.50   11.00 
  -5   0   1  -17.20   12.00 
   5   0  -1   -0.60    9.50 
  -5   0   1    9.90   12.10 
  -5   0   1   -6.10   13.70 
   4   0  -1  -13.10   12.60 
   4   0  -1    2.40    8.20 
  -4   0   1  -11.20   10.30 
  -4   0   1   -6.20    6.70 
   4   0  -1   -8.50    7.10 
  -4   0   1    0.20    9.40 
  -4   0   1    1.80   10.70 
   3   0  -1   -5.20    9.10 
  -3   0   1    0.10    7.90 
   3   0  -1   14.30    7.00 
  -3   0   1   -4.10    9.20 
  -3   0   1   -0.80    7.40 
  -3   0   1   -1.80    6.30 
   3   0  -1   -2.50    7.30 
   3   0  -1   -8.20    6.50 
   2   0  -1    5.60    7.30 
   2   0  -1   -0.90    7.60 
  -2   0   1  -15.00    8.20 
  -2   0   1    5.00    7.10 
   2   0  -1  -15.00    8.90 
  -2   0   1    6.20    7.50 
  -2   0   1   -1.00    6.30 
   2   0  -1   -2.20    6.40 
  -1   0   1    1.60    2.80 
   1   0  -1   -1.20    3.10 
  -1   0   1    1.30    1.60 
   1   0  -1   -2.40    3.10 
   1   0  -1    1.30    2.00 
   1   0  -1   -0.80    2.50 
  -1   0   1   -1.00    3.60 
  -1   0   1    0.30    3.10 
  -1   0  -1    9.90    5.30 
  -1   0  -1    7.80    5.70 
   1   0   1    2.50    1.70 
   1   0   1    4.60    5.30 
   1   0   1   -2.00    5.30 
   2   0   1    2.90    3.50 
   2   0   1    7.80    7.70 
  -2   0  -1   10.70   10.30 
   2   0   1  -16.10    9.00 
  -2   0  -1    3.20    3.40 
  -2   0  -1    1.70   10.20 
   3   0   1   -0.60    7.10 
  -3   0  -1    6.40   10.00 
  -3   0  -1    3.20    9.40 
   3   0   1    4.10    4.20 
   3   0   1   -8.60    9.20 
  -3   0  -1   -4.00    3.60 
  -4   0  -1   -2.60    4.80 
   4   0   1   -4.20    9.90 
   4   0   1   -1.20    5.70 
  -4   0  -1   17.40   13.90 
  -4   0  -1    8.50   14.10 
   4   0   1  -13.50   13.00 
  -5   0  -1   -1.80   14.00 
   5   0   1   -4.30    6.10 
  -5   0  -1  -10.60    5.60 
   5   0   1  -17.10   12.80 
   5   0   1   -3.50   10.50 
  -5   0  -1   -9.70   13.40 
  -6   0  -1   -1.30   15.50 
   6   0   1    7.50    7.30 
  -6   0  -1   -0.60    6.30 
   6   0   1  -14.20   17.10 
   7   0   1  -16.70   19.00 
   7   0   1   -5.00    8.60 
  -7   0  -1   -5.60   20.10 
  -7   0  -1  -17.90   20.20 
  -7   0  -1   -1.10   18.80 
  -7   0  -1    2.50    7.90 
   7   0   1   -7.40   12.10 
   8   0   1    4.90   12.40 
  -8   0  -1   -8.60    8.50 
  -8   0  -1   25.20   22.80 
  -8   0  -1   -0.30   24.60 
   8   0   1  -24.20   23.30 
   9   0   1  -24.40   26.70 
   9   0   1    2.70   13.00 
  -9   0  -1  -17.80    9.60 
  -9   0  -1   -2.40   25.80 
  -9   0  -1   12.70   26.50 
  10   0   1   18.80   41.70 
 -10   0  -1   12.30   29.80 
 -10   0  -1   -5.70   28.40 
 -10   0  -1   -1.40   13.10 
  10   0   1   19.10   14.60 
 -11   0  -1   -7.60   35.90 
 -11   0  -1  -50.09   32.40 
  11   0   1  -21.30   36.80 
  12  -1  -1  -41.30   40.50 
 -12  -1   1   -5.30   35.90 
 -12  -1   1   42.50   35.30 
  12  -1  -1   47.30   24.30 
 -12   1   1   -1.20   38.30 
  12   1  -1   72.09   42.50 
 -12   1   1   24.20   38.20 
  12   1  -1  -10.30   24.20 
  11  -1  -1  529.95   60.09 
 -11  -1   1  591.14   56.59 
 -11  -1   1  551.14   59.79 
  11  -1  -1  474.15   40.30 
  11   1  -1  534.25   41.10 
 -11   1   1  498.15   55.49 
 -11   1   1  527.85   52.59 
  11   1  -1  513.55   62.69 
 -10  -1   1  616.24   49.70 
 -10  -1   1  470.55   32.50 
 -10  -1   1  619.54   52.79 
  10  -1  -1  492.05   54.99 
  10  -1  -1  556.74   38.30 
 -10   1   1  483.45   32.90 
  10   1  -1  548.65   39.60 
 -10   1   1  569.84   50.19 
 -10   1   1  616.24   52.79 
  10   1  -1  493.05   56.49 
   9  -1  -1   41.30   17.40 
   9  -1  -1   50.59   27.80 
   9  -1  -1   82.29   18.70 
  -9  -1   1   65.49   27.10 
  -9  -1   1   66.99   25.90 
  -9  -1   1   35.90   15.30 
  -9   1   1   57.49   25.50 
   9   1  -1   73.19   19.50 
  -9   1   1   78.69   27.50 
   9   1  -1   58.29   28.60 
  -9   1   1   45.90   13.90 
   8  -1  -1  118.19   28.20 
   8  -1  -1  157.18   20.90 
  -8  -1   1   86.09   24.10 
  -8  -1   1  138.09   16.40 
  -8  -1   1  135.79   25.20 
   8  -1  -1  120.89   18.20 
   8   1  -1   93.89   18.00 
  -8   1   1   88.89   15.90 
   8   1  -1   94.89   30.20 
  -8   1   1  123.29   26.00 
   8   1  -1  140.69   19.70 
  -8   1   1  121.69   23.90 
   7  -1  -1 1142.69   55.19 
  -7  -1   1 1087.19   52.49 
   7  -1  -1 1129.99   44.60 
   7  -1  -1 1108.99   45.40 
  -7  -1   1  963.50   48.80 
  -7  -1   1 1117.29   42.80 
  -7  -1   1 1066.09   51.29 
  -7   1   1 1097.19   50.69 
  -7   1   1 1051.89   51.29 
   7   1  -1 1107.99   44.70 
   7   1  -1  993.40   53.79 
  -7   1   1 1088.19   41.90 
   7   1  -1 1115.99   46.60 
  -7   1   1 1150.08   53.69 
   6  -1  -1 2034.90   67.49 
  -6  -1   1 1866.91   71.29 
  -6  -1   1 1997.80   66.19 
   6  -1  -1 2043.10   69.69 
   6  -1  -1 1889.41   75.49 
  -6  -1   1 2014.50   73.99 
  -6  -1   1 2041.40   72.29 
  -6   1   1 2002.10   73.59 
   6   1  -1 2054.99   69.79 
   6   1  -1 2013.80   76.59 
   6   1  -1 2002.70   67.49 
  -6   1   1 2039.40   71.59 
  -6   1   1 2012.10   74.19 
  -6   1   1 2057.69   66.09 
   5  -1  -1  753.02   40.60 
  -5  -1   1  836.22   38.10 
  -5  -1   1  813.42   35.50 
  -5  -1   1  830.72   37.30 
  -5  -1   1  890.01   41.30 
   5  -1  -1  866.51   34.90 
  -5   1   1  805.02   36.50 
   5   1  -1  811.12   41.50 
   5   1  -1  850.41   34.20 
   5   1  -1  835.82   35.30 
  -5   1   1  831.22   39.10 
  -5   1   1  837.52   39.20 
   4  -1  -1 1697.43   55.89 
  -4  -1   1 1780.42   54.89 
  -4  -1   1 1657.53   59.19 
   4  -1  -1 1669.43   54.89 
  -4  -1   1 1695.13   57.29 
  -4  -1   1 1738.83   57.19 
   4  -1  -1 1670.93   59.99 
   4   1  -1 1709.03   55.29 
  -4   1   1 1688.13   56.19 
   4   1  -1 1694.23   56.59 
  -4   1   1 1601.24   58.69 
  -4   1   1 1725.13   54.59 
  -4   1   1 1576.64   62.79 
   4   1  -1 1632.84   59.99 
   3  -1  -1 2635.64   86.29 
  -3  -1   1 2768.12   86.39 
  -3  -1   1 2673.73   83.69 
   3  -1  -1 2763.82   84.79 
   3  -1  -1 2758.32   83.19 
  -3  -1   1 2827.62   83.19 
  -3  -1   1 2738.33   84.19 
   3  -1  -1 2627.34   82.89 
  -3   1   1 2668.93   83.09 
   3   1  -1 2783.12   84.09 
   3   1  -1 2846.82   86.59 
  -3   1   1 2792.22   85.29 
  -3   1   1 2454.95   85.19 
   3   1  -1 2740.53   83.79 
   3   1  -1 2709.43   83.19 
  -3   1   1 2821.82   82.99 
  -2  -1   1  513.45   20.60 
  -2  -1   1  503.05   20.40 
  -2  -1   1  477.65   23.60 
   2  -1  -1  479.85   22.40 
   2  -1  -1  511.45   21.40 
   2  -1  -1  464.45   20.50 
  -2  -1   1  453.05   19.80 
   2  -1  -1  506.35   19.10 
  -2   1   1  511.85   22.00 
   2   1  -1  470.85   20.30 
  -2   1   1  466.55   18.90 
   2   1  -1  475.05   20.20 
  -2   1   1  471.25   22.60 
   2   1  -1  459.95   23.00 
   2   1  -1  504.85   20.10 
  -2   1   1  472.95   19.80 
   1  -1  -1    5.00    1.70 
   1  -1  -1    2.90    3.30 
  -1  -1   1    3.00    3.40 
  -1  -1   1    5.40    3.70 
   1  -1  -1    2.90    3.70 
   1  -1  -1    5.50    3.80 
  -1  -1   1    5.60    3.40 
  -1   1   1    0.70    1.10 
   1   1  -1    4.10    2.70 
  -1   1   1    9.70    3.40 
  -1   1   1    7.30    4.20 
   1   1  -1   -0.90    3.50 
   1   1  -1    4.70    3.80 
   1   1  -1   -1.00    1.90 
  -1   1   1    9.40    3.50 
   1  -1   1 5612.74  161.98 
   1  -1   1 5519.15  160.98 
  -1  -1  -1 5544.35  159.28 
  -1  -1  -1 5302.67  161.98 
  -1  -1  -1 5788.22  161.48 
   1   1   1 5533.05  161.58 
   1   1   1 5666.13  159.38 
  -1   1  -1 5622.54  160.98 
   1   1   1 5521.85  162.08 
  -1   1  -1 5326.47  161.88 
   2  -1   1 1555.34   50.09 
   2  -1   1 1377.16   49.60 
   2  -1   1 1428.86   44.30 
  -2  -1  -1 1505.05   45.20 
  -2  -1  -1 1596.84   50.89 
  -2  -1  -1 1553.64   51.19 
  -2   1  -1 1447.36   49.90 
  -2   1  -1 1570.54   44.40 
  -2   1  -1 1565.04   50.49 
   2   1   1 1550.04   45.40 
   2   1   1 1526.25   49.99 
   2   1   1 1516.05   50.89 
   3  -1   1  378.56   22.30 
  -3  -1  -1  407.36   15.40 
  -3  -1  -1  476.25   23.70 
   3  -1   1  413.76   14.90 
   3  -1   1  397.26   21.00 
  -3   1  -1  423.16   23.10 
  -3   1  -1  412.26   22.70 
  -3   1  -1  436.16   14.90 
   3   1   1  356.86   22.80 
   3   1   1  412.56   15.90 
   4  -1   1  990.80   32.90 
  -4  -1  -1  995.40   33.10 
   4  -1   1 1010.90   39.80 
  -4  -1  -1 1093.29   43.50 
   4  -1   1 1001.90   42.60 
  -4  -1  -1 1002.60   43.00 
  -4   1  -1 1002.40   32.50 
  -4   1  -1  946.41   42.10 
   4   1   1 1028.70   33.60 
   4   1   1  972.20   40.10 
  -4   1  -1 1066.69   43.00 
   4   1   1  936.21   43.10 
  -5  -1  -1 1759.82   65.29 
  -5  -1  -1 1795.52   54.89 
  -5  -1  -1 1670.73   64.29 
   5  -1   1 1754.62   61.89 
   5  -1   1 1632.44   54.29 
   5  -1   1 1736.23   65.09 
  -5   1  -1 1753.02   54.19 
   5   1   1 1694.33   54.99 
  -5   1  -1 1718.33   64.79 
   5   1   1 1763.02   62.79 
  -5   1  -1 1844.72   65.79 
   5   1   1 1723.13   66.09 
   6  -1   1  371.06   18.20 
   6  -1   1  304.07   32.40 
  -6  -1  -1  360.26   18.20 
   6  -1   1  366.16   25.30 
  -6  -1  -1  370.66   33.40 
  -6   1  -1  368.66   32.70 
  -6   1  -1  383.56   17.80 
  -6   1  -1  389.76   37.80 
   6   1   1  373.96   33.90 
   6   1   1  386.16   19.40 
   7  -1   1  -13.00    8.30 
   7  -1   1   -6.50   20.40 
  -7  -1  -1    8.50   13.10 
  -7  -1  -1   -2.20   20.20 
   7  -1   1   -1.80   12.80 
  -7  -1  -1    9.20   19.50 
  -7  -1  -1    0.80   19.10 
  -7   1  -1   16.60   20.70 
  -7   1  -1   14.70   18.40 
  -7   1  -1   -4.50    8.00 
   7   1   1    4.20   22.60 
  -7   1  -1  -20.30   19.30 
   7   1   1   35.00   14.50 
  -8  -1  -1  693.33   50.39 
  -8  -1  -1  651.93   28.00 
  -8  -1  -1  620.64   46.00 
   8  -1   1  624.04   30.40 
   8  -1   1  602.84   49.90 
   8   1   1  606.14   31.00 
   8   1   1  610.14   49.90 
  -8   1  -1  624.04   45.60 
  -8   1  -1  751.32   49.40 
  -8   1  -1  630.64   29.20 
  -9  -1  -1  705.33   31.10 
  -9  -1  -1  740.83   56.19 
   9  -1   1  707.13   33.70 
   9  -1   1  698.43   57.19 
  -9  -1  -1  667.83   53.39 
   9   1   1  712.83   35.10 
  -9   1  -1  747.43   55.09 
   9   1   1  663.03   57.69 
  -9   1  -1  739.83   54.89 
  -9   1  -1  707.23   30.20 
  10  -1   1  269.97   26.30 
  10  -1   1  147.09   63.59 
 -10  -1  -1  216.68   39.60 
 -10  -1  -1  242.18   36.10 
 -10  -1  -1  214.38   22.20 
 -10   1  -1  286.27   40.30 
 -10   1  -1  197.28   19.60 
 -10   1  -1  246.78   40.40 
  10   1   1  199.38   47.50 
  10   1   1  197.38   20.70 
  11  -1   1  -47.90   36.70 
 -11  -1  -1   25.00   39.20 
 -11  -1  -1   11.00   38.20 
 -11   1  -1    5.90   32.20 
 -11   1  -1   26.20   36.00 
  11   1   1  -28.00   35.50 
 -12  -2   1  682.63   63.29 
  12  -2  -1  749.53   76.89 
  12  -2  -1  690.33   49.80 
 -12  -2   1  556.34   64.09 
  12   2  -1  650.13   49.70 
 -12   2   1  711.83   67.49 
  12   2  -1  741.33   73.79 
 -12   2   1  707.33   66.69 
  11  -2  -1  379.66   49.60 
  11  -2  -1  508.95   39.80 
 -11  -2   1  480.15   58.29 
 -11  -2   1  435.96   54.29 
  11   2  -1  387.66   50.69 
  11   2  -1  450.15   41.80 
 -11   2   1  483.05   55.09 
 -11   2   1  436.76   50.89 
 -10  -2   1  160.38   30.60 
 -10  -2   1  146.99   33.10 
  10  -2  -1  117.69   33.70 
 -10  -2   1  142.69   20.80 
  10  -2  -1  143.79   23.60 
  10   2  -1  164.38   38.40 
 -10   2   1  181.28   34.80 
 -10   2   1  115.49   19.00 
 -10   2   1  177.18   31.70 
  10   2  -1  158.98   23.90 
  -9  -2   1  907.31   48.00 
   9  -2  -1  962.90   61.59 
   9  -2  -1  876.21   45.50 
  -9  -2   1  974.10   56.89 
   9  -2  -1  930.01   44.60 
  -9  -2   1  899.01   52.19 
  -9   2   1  950.70   56.89 
   9   2  -1 1002.90   46.30 
  -9   2   1  969.30   42.00 
   9   2  -1  945.81   62.99 
  -9   2   1  953.40   55.89 
  -8  -2   1 1824.02   74.09 
   8  -2  -1 1841.42   64.99 
  -8  -2   1 1699.13   71.89 
  -8  -2   1 1761.72   62.99 
   8  -2  -1 1822.62   68.29 
   8  -2  -1 1895.81   79.19 
  -8   2   1 1668.03   74.29 
   8   2  -1 1823.42   69.89 
  -8   2   1 1838.52   63.19 
   8   2  -1 1763.12   65.59 
  -8   2   1 1734.63   72.09 
   8   2  -1 1747.13   78.89 
  -7  -2   1  234.28   28.50 
  -7  -2   1  275.57   31.70 
  -7  -2   1  224.78   28.60 
   7  -2  -1  216.38   27.20 
   7  -2  -1  252.97   23.70 
   7  -2  -1  262.87   22.50 
  -7  -2   1  257.67   21.10 
  -7   2   1  268.37   30.30 
   7   2  -1  268.47   32.30 
  -7   2   1  270.77   32.70 
  -7   2   1  254.57   30.90 
   7   2  -1  258.97   24.40 
   7   2  -1  365.76   39.30 
  -7   2   1  247.18   20.70 
  -6  -2   1  371.46   31.60 
   6  -2  -1  346.07   23.40 
  -6  -2   1  381.96   21.80 
   6  -2  -1  317.87   31.50 
  -6  -2   1  374.16   30.60 
   6  -2  -1  365.66   22.60 
  -6  -2   1  361.86   28.10 
  -6   2   1  367.06   31.40 
   6   2  -1  384.86   24.60 
  -6   2   1  352.86   28.60 
  -6   2   1  318.37   30.40 
   6   2  -1  350.26   33.80 
  -6   2   1  387.76   22.10 
   6   2  -1  373.26   25.10 
  -5  -2   1 2462.95   81.89 
   5  -2  -1 2412.76   85.09 
  -5  -2   1 2362.36   82.09 
   5  -2  -1 2555.14   79.99 
  -5  -2   1 2620.84   85.49 
  -5  -2   1 2563.74   78.49 
  -5   2   1 2428.96   83.99 
   5   2  -1 2491.65   79.19 
  -5   2   1 2216.98   80.69 
  -5   2   1 2518.45   81.19 
   5   2  -1 2376.56   85.59 
   5   2  -1 2619.14   81.89 
  -5   2   1 2332.57   83.59 
  -4  -2   1 2287.57   74.99 
  -4  -2   1 2201.48   71.59 
   4  -2  -1 2104.39   74.59 
  -4  -2   1 2335.77   69.99 
   4  -2  -1 2303.07   70.79 
  -4  -2   1 1963.00   74.59 
   4  -2  -1 2243.78   69.89 
   4   2  -1 2151.38   74.59 
   4   2  -1 2198.18   72.09 
  -4   2   1 2272.07   69.49 
  -4   2   1 2210.68   70.79 
  -4   2   1 2334.57   74.79 
   4   2  -1 2183.98   70.29 
  -4   2   1 2172.98   73.59 
  -3  -2   1  611.14   24.70 
  -3  -2   1  616.94   27.60 
   3  -2  -1  644.54   25.70 
  -3  -2   1  602.14   24.00 
   3  -2  -1  596.04   23.60 
  -3  -2   1  589.94   25.30 
   3  -2  -1  587.64   22.90 
   3  -2  -1  584.44   26.20 
  -3   2   1  619.84   23.50 
  -3   2   1  638.24   27.10 
  -3   2   1  600.24   23.80 
   3   2  -1  590.54   24.00 
  -3   2   1  606.74   27.40 
   3   2  -1  570.04   27.00 
   3   2  -1  604.24   24.00 
   3   2  -1  581.24   24.80 
  -2  -2   1    5.70    7.40 
  -2  -2   1   31.60    8.00 
   2  -2  -1    9.20   10.00 
   2  -2  -1   19.30    8.10 
   2  -2  -1   21.10    8.60 
  -2  -2   1   26.40   11.50 
  -2  -2   1   16.00    7.50 
   2  -2  -1   31.60    6.10 
   2   2  -1   12.60    7.90 
   2   2  -1   23.20    8.20 
  -2   2   1   21.80    7.70 
  -2   2   1   23.20    6.20 
   2   2  -1   16.50   10.80 
   2   2  -1   35.00    7.50 
  -2   2   1   29.30   10.00 
  -2   2   1    9.50    9.20 
   1  -2  -1 9057.19  271.17 
  -1  -2   1 9379.26  270.77 
  -1   2   1 9219.08  271.17 
  -1   2   1 9422.96  271.67 
  -1   2   1 9999.00  271.77 
   0   2  -1 3258.17   94.79 
  -1  -2  -1  158.18    7.40 
   1  -2   1  105.99    9.50 
   1  -2   1  142.79   10.40 
  -1  -2  -1  148.89   10.80 
  -1  -2  -1  134.39   12.40 
  -1  -2  -1  122.39    9.50 
  -1   2  -1  103.59    9.10 
   1   2   1  150.78   11.70 
  -1   2  -1  114.79   10.00 
   1   2   1  116.59    7.30 
   1   2   1  127.49   12.10 
  -2  -2  -1 1010.10   35.00 
   2  -2   1  882.71   32.50 
   2  -2   1  860.91   27.00 
  -2  -2  -1  837.42   33.90 
   2  -2   1  885.71   33.20 
   2   2   1  921.71   34.50 
  -2   2  -1  893.91   33.50 
   2   2   1  972.80   35.40 
  -2   2  -1  919.21   27.20 
   2   2   1  917.21   28.80 
  -2   2  -1  907.41   33.20 
  -3  -2  -1 1573.24   48.10 
   3  -2   1 1532.65   53.39 
   3  -2   1 1546.05   46.90 
   3  -2   1 1541.45   52.69 
  -3  -2  -1 1650.13   54.79 
   3   2   1 1493.55   54.09 
  -3   2  -1 1591.94   53.79 
  -3   2  -1 1559.64   46.90 
  -3   2  -1 1616.24   53.79 
   3   2   1 1577.44   48.30 
  -4  -2  -1 1056.79   35.00 
  -4  -2  -1 1052.59   44.30 
   4  -2   1 1070.29   41.10 
  -4  -2  -1 1172.98   44.70 
   4  -2   1  992.70   43.10 
   4  -2   1 1019.10   34.00 
  -4   2  -1 1070.79   33.90 
   4   2   1  991.70   44.60 
  -4   2  -1 1043.00   43.30 
  -4   2  -1 1081.99   44.10 
   4   2   1 1093.29   42.80 
   4   2   1 1059.09   35.40 
   5  -2   1   17.70   14.50 
   5  -2   1   37.90    7.50 
  -5  -2  -1   57.99    7.70 
  -5  -2  -1   16.80   15.40 
  -5  -2  -1   56.99   17.40 
   5  -2   1   57.19   11.20 
  -5   2  -1   48.20   15.90 
  -5   2  -1   47.30    7.10 
  -5   2  -1   68.39   17.10 
   5   2   1   37.00   16.80 
   5   2   1   13.50   11.50 
   5   2   1   45.40    8.00 
   6  -2   1 1073.29   45.20 
  -6  -2  -1 1122.49   55.79 
  -6  -2  -1 1043.60   37.50 
   6  -2   1 1054.79   50.19 
  -6  -2  -1 1033.00   50.29 
   6  -2   1 1092.69   37.20 
  -6   2  -1 1090.29   36.60 
  -6   2  -1 1059.69   50.49 
   6   2   1 1111.59   47.40 
  -6   2  -1 1112.69   53.49 
   6   2   1 1057.09   51.49 
   6   2   1 1080.29   38.50 
  -7  -2  -1 2210.58   83.49 
   7  -2   1 2343.47   71.49 
   7  -2   1 2145.39   86.39 
   7  -2   1 2321.47   81.39 
  -7  -2  -1 2383.96   72.69 
  -7  -2  -1 2112.69   85.79 
  -7  -2  -1 2279.57   86.09 
  -7   2  -1 2291.17   70.59 
   7   2   1 2310.07   82.69 
   7   2   1 2108.09   85.69 
   7   2   1 2214.88   72.89 
  -7   2  -1 2130.09   85.49 
  -7   2  -1 2218.88   85.39 
  -7   2  -1 2298.37   85.49 
  -8  -2  -1  733.93   30.50 
  -8  -2  -1  761.62   47.40 
  -8  -2  -1  731.23   50.39 
   8  -2   1  737.33   52.39 
   8   2   1  693.13   53.09 
  -8   2  -1  793.22   48.90 
  -8   2  -1  663.13   49.40 
   8   2   1  658.63   33.30 
  -9  -2  -1  -30.10   24.70 
  -9  -2  -1   62.79   28.80 
   9  -2   1   40.40   27.90 
   9  -2   1   53.19   14.00 
  -9  -2  -1   43.20   11.70 
  -9   2  -1   28.60   10.20 
  -9   2  -1   -6.20   26.60 
   9   2   1    7.90   30.50 
  -9   2  -1   10.80   27.00 
   9   2   1   36.40   15.20 
 -10  -2  -1  778.02   37.00 
  10  -2   1  827.72   37.20 
 -10  -2  -1  848.22   56.19 
 -10  -2  -1 1002.20   64.99 
 -10   2  -1  692.13   38.40 
  10   2   1  826.82   40.40 
 -10   2  -1  929.01   63.69 
 -10   2  -1  848.42   61.69 
  10   2   1  849.81   67.49 
 -11  -2  -1  539.75   68.19 
  11  -2   1  520.55   64.29 
 -11  -2  -1  553.64   74.09 
  11   2   1  431.96   51.09 
 -11   2  -1  515.55   64.29 
  11   2   1  594.24   65.99 
 -11   2  -1  483.35   52.39 
  12  -3  -1   46.80   41.30 
 -12  -3   1   54.79   37.30 
 -12  -3   1   96.09   38.50 
  12  -3  -1  -13.80   23.70 
 -12   3   1   82.59   37.40 
  12   3  -1   56.99   45.70 
 -12   3   1   46.50   38.90 
  12   3  -1   52.49   24.20 
  11  -3  -1  351.36   49.60 
  11  -3  -1  475.15   39.80 
 -11  -3   1  400.96   46.10 
 -11  -3   1  457.15   50.19 
  11   3  -1  415.16   52.19 
 -11   3   1  517.35   55.49 
  11   3  -1  401.46   41.90 
 -10  -3   1  207.38   35.70 
  10  -3  -1  188.48   39.00 
 -10  -3   1  249.28   27.70 
 -10  -3   1  196.88   32.40 
  10  -3  -1  240.08   25.40 
 -10   3   1  246.18   34.20 
 -10   3   1  228.08   36.50 
 -10   3   1  255.67   27.10 
  10   3  -1  241.68   27.10 
  10   3  -1  202.38   41.20 
   9  -3  -1   98.29   17.30 
  -9  -3   1   82.99   27.40 
   9  -3  -1  108.29   30.60 
   9  -3  -1   87.39   19.60 
  -9  -3   1   90.19   26.50 
   9   3  -1   98.59   20.70 
  -9   3   1   73.29   26.00 
  -9   3   1   81.09   16.50 
  -9   3   1  145.09   31.10 
   9   3  -1   66.49   28.80 
   8  -3  -1   31.00   13.90 
  -8  -3   1   30.80   20.60 
  -8  -3   1   24.50   13.40 
  -8  -3   1   25.20   20.80 
   8  -3  -1   17.20   14.50 
   8  -3  -1   14.40   25.00 
   8   3  -1   37.00   16.10 
  -8   3   1   16.50   13.10 
  -8   3   1   40.20   21.90 
  -8   3   1   36.00   21.00 
   8   3  -1   28.90   17.20 
   8   3  -1   10.60   23.70 
  -7  -3   1  345.17   35.00 
  -7  -3   1  372.26   23.40 
  -7  -3   1  355.96   33.60 
   7  -3  -1  343.07   36.20 
   7  -3  -1  362.66   25.00 
  -7  -3   1  379.16   31.60 
   7  -3  -1  378.46   26.10 
  -7   3   1  351.36   22.60 
   7   3  -1  376.36   27.30 
   7   3  -1  339.97   36.60 
  -7   3   1  306.27   33.60 
  -7   3   1  386.96   33.10 
  -7   3   1  353.46   31.70 
   7   3  -1  345.57   30.90 
  -6  -3   1  710.43   35.50 
   6  -3  -1  710.33   31.80 
  -6  -3   1  681.93   40.70 
  -6  -3   1  724.83   30.20 
   6  -3  -1  677.03   41.30 
  -6  -3   1  639.74   36.50 
   6  -3  -1  685.63   31.80 
  -6   3   1  751.72   36.10 
   6   3  -1  683.73   32.50 
   6   3  -1  761.82   35.40 
  -6   3   1  639.44   38.90 
  -6   3   1  680.43   38.30 
  -6   3   1  698.13   30.10 
   6   3  -1  695.93   41.70 
  -5  -3   1  797.52   39.20 
   5  -3  -1  817.92   33.20 
  -5  -3   1  853.41   33.40 
  -5  -3   1  848.12   36.10 
   5  -3  -1  783.52   40.90 
  -5  -3   1  834.82   38.20 
  -5   3   1  700.23   35.00 
  -5   3   1  855.31   40.70 
   5   3  -1  855.91   36.20 
  -5   3   1  831.52   38.80 
   5   3  -1  826.22   41.20 
  -5   3   1  839.32   35.90 
   5   3  -1  824.62   34.40 
  -4  -3   1  610.04   25.10 
  -4  -3   1  554.24   30.10 
  -4  -3   1  617.94   31.00 
   4  -3  -1  579.54   24.30 
  -4  -3   1  567.74   25.90 
   4  -3  -1  586.74   23.80 
   4  -3  -1  504.95   29.70 
   4   3  -1  593.14   25.40 
  -4   3   1  586.34   24.10 
   4   3  -1  537.95   29.70 
  -4   3   1  608.54   29.10 
  -4   3   1  549.74   29.90 
  -4   3   1  591.34   25.90 
   4   3  -1  561.34   31.60 
  -3  -3   1 1148.39   41.00 
   3  -3  -1 1080.29   40.00 
   3  -3  -1 1016.70   34.90 
  -3  -3   1 1056.49   36.30 
   3  -3  -1 1101.49   38.80 
  -3  -3   1 1101.29   36.60 
   3  -3  -1 1016.50   35.90 
  -3  -3   1 1043.40   37.70 
  -3   3   1 1102.89   39.50 
   3   3  -1 1076.89   37.00 
   3   3  -1 1013.60   40.10 
   3   3  -1 1060.39   36.10 
  -3   3   1 1043.80   35.80 
  -3   3   1 1034.20   35.60 
  -3   3   1  987.20   39.00 
   2  -3  -1   83.09   11.90 
   2  -3  -1   61.59    9.10 
   2  -3  -1   77.39    8.30 
  -2  -3   1   77.79    8.60 
  -2  -3   1   68.89    8.80 
   2  -3  -1   83.29   10.70 
  -2  -3   1   47.60    8.80 
  -2  -3   1   75.89   12.30 
   2   3  -1   58.79    9.50 
   2   3  -1   47.40   11.60 
   2   3  -1   89.69   10.70 
  -2   3   1   77.89   11.70 
  -2   3   1   60.89    8.60 
  -2   3   1   74.59   11.40 
   2   3  -1   82.09   10.40 
  -2   3   1   92.59    9.30 
  -1  -3   1  287.87   11.60 
  -1  -3   1  312.97   13.10 
  -1  -3   1  282.67   12.40 
   1  -3  -1  290.47   12.80 
   1  -3  -1  280.97   13.00 
  -1  -3   1  286.77   12.40 
   1   3  -1  283.47   13.00 
  -1   3   1  294.07   13.70 
   1   3  -1  320.07   13.40 
  -1   3   1  304.87   13.30 
   1   3  -1  282.07   11.90 
   1   3  -1  274.87   11.10 
   0  -3  -1  484.75   16.50 
   0  -3  -1  458.25   16.60 
   0  -3  -1  470.75   16.50 
   0  -3   1  490.65   17.30 
   0  -3  -1  481.25   16.50 
   0  -3   1  470.85   16.00 
   0   3  -1  502.65   16.20 
   0   3   1  484.55   16.50 
   0   3   1  478.55   16.50 
   0   3  -1  433.96   16.60 
   0   3   1  493.35   17.00 
   0   3  -1  526.25   17.30 
  -1  -3  -1  714.53   27.10 
   1  -3   1  727.33   25.50 
  -1  -3  -1  716.73   24.30 
  -1  -3  -1  727.23   25.70 
   1  -3   1  718.03   24.30 
  -1  -3  -1  703.63   23.40 
   1   3   1  731.83   26.20 
   1   3   1  715.73   23.50 
  -1   3  -1  695.13   21.80 
  -1   3  -1  709.43   21.70 
  -1   3  -1  678.83   25.60 
   1   3   1  723.23   26.70 
  -1   3  -1  727.83   24.30 
   2  -3   1 1066.59   36.70 
  -2  -3  -1 1087.69   38.30 
   2  -3   1 1043.20   36.60 
   2  -3   1 1064.39   31.60 
  -2  -3  -1  968.10   37.80 
   2   3   1 1114.19   38.90 
  -2   3  -1 1033.10   36.90 
   2   3   1 1045.40   33.50 
  -2   3  -1 1105.59   37.20 
  -2   3  -1 1046.30   31.70 
   2   3   1 1082.19   38.10 
  -3  -3  -1    8.20    9.80 
   3  -3   1   -2.80    8.20 
  -3  -3  -1   -3.20   10.60 
   3  -3   1   -3.60    6.70 
  -3  -3  -1    6.40    4.60 
   3  -3   1    2.20    3.50 
  -3   3  -1    0.00    7.90 
  -3   3  -1    5.00    3.70 
   3   3   1   -0.90    8.20 
   3   3   1    5.60    5.20 
   3   3   1   -7.50   12.20 
  -3   3  -1    7.80    8.30 
   4  -3   1  466.65   24.40 
  -4  -3  -1  455.65   30.60 
   4  -3   1  458.85   28.60 
  -4  -3  -1  509.35   29.80 
  -4  -3  -1  479.25   19.30 
   4  -3   1  465.35   17.80 
   4   3   1  469.75   19.90 
  -4   3  -1  481.55   29.00 
   4   3   1  420.86   30.20 
  -4   3  -1  451.35   28.70 
   4   3   1  469.15   27.20 
  -4   3  -1  473.05   17.70 
  -5  -3  -1 1707.03   54.09 
  -5  -3  -1 1628.54   64.09 
   5  -3   1 1657.03   52.69 
  -5  -3  -1 1738.93   64.79 
   5  -3   1 1630.34   63.59 
   5  -3   1 1638.44   59.69 
   5   3   1 1667.03   64.69 
  -5   3  -1 1780.72   63.49 
  -5   3  -1 1680.73   52.49 
   5   3   1 1721.33   54.59 
  -5   3  -1 1678.13   62.99 
   5   3   1 1684.23   62.29 
   6  -3   1  153.88   19.70 
   6  -3   1  154.58   13.10 
   6  -3   1  156.48   22.20 
  -6  -3  -1  125.69   22.40 
  -6  -3  -1  149.39   13.90 
  -6  -3  -1  144.79   23.90 
   6   3   1  131.89   22.30 
   6   3   1  177.88   15.40 
  -6   3  -1  152.18   12.40 
  -6   3  -1  140.49   20.90 
   6   3   1   96.59   16.10 
  -6   3  -1  153.58   23.80 
  -7  -3  -1  390.26   33.80 
  -7  -3  -1  289.87   35.10 
   7  -3   1  340.17   19.50 
  -7  -3  -1  366.36   20.60 
   7  -3   1  372.26   27.60 
  -7  -3  -1  386.26   38.00 
   7  -3   1  388.26   38.00 
   7   3   1  328.17   28.40 
   7   3   1  335.77   23.30 
  -7   3  -1  396.46   38.60 
  -7   3  -1  381.06   36.80 
   7   3   1  289.97   38.20 
  -7   3  -1  341.67   35.80 
  -7   3  -1  320.17   18.30 
   8  -3   1  377.06   43.70 
  -8  -3  -1  442.06   22.50 
  -8  -3  -1  440.16   46.00 
  -8  -3  -1  436.46   38.20 
   8   3   1  430.16   27.20 
  -8   3  -1  383.66   41.20 
  -8   3  -1  389.96   45.70 
   8   3   1  425.26   46.20 
  -8   3  -1  342.37   23.10 
   9  -3   1  376.26   26.10 
  -9  -3  -1  481.25   43.00 
  -9  -3  -1  468.25   50.39 
  -9  -3  -1  418.56   24.40 
   9  -3   1  414.46   49.10 
  -9   3  -1  374.76   40.00 
   9   3   1  435.36   50.29 
  -9   3  -1  414.06   22.40 
  -9   3  -1  372.56   47.00 
   9   3   1  463.55   30.30 
 -10  -3  -1  241.48   36.30 
  10  -3   1  162.78   17.90 
 -10  -3  -1  201.78   44.10 
  10   3   1  194.98   21.90 
 -10   3  -1  195.48   35.70 
  10   3   1  150.38   37.20 
 -10   3  -1  220.08   37.80 
 -11  -3  -1   15.90   33.20 
 -11  -3  -1   50.59   36.70 
  11  -3   1   50.29   37.10 
 -11   3  -1   17.10   35.40 
  11   3   1   34.20   20.10 
 -11   3  -1   11.20   34.90 
  11   3   1   35.50   37.80 
 -12  -4   1  127.89   46.60 
 -12  -4   1  124.99   37.40 
  12  -4  -1   35.80   24.70 
  12  -4  -1  113.29   44.00 
 -12   4   1  144.99   42.20 
 -12   4   1  106.49   39.10 
  12   4  -1  130.79   45.40 
  12   4  -1  125.39   28.20 
  11  -4  -1   46.70   36.70 
 -11  -4   1   28.60   27.60 
  11  -4  -1  -15.40   21.30 
 -11   4   1   34.40   35.30 
  11   4  -1   56.79   39.00 
  11   4  -1   45.70   22.50 
 -11   4   1   37.30   30.90 
 -10  -4   1   19.20   28.20 
  10  -4  -1   12.10   17.80 
  10  -4  -1   34.10   30.60 
 -10  -4   1   26.00   27.20 
 -10  -4   1  -19.10   16.70 
  10   4  -1    4.50   38.70 
 -10   4   1   28.90   27.80 
  10   4  -1   36.70   20.70 
 -10   4   1   -9.50   26.20 
 -10   4   1   10.60   18.70 
   9  -4  -1   18.40   15.60 
  -9  -4   1   -3.00   25.00 
  -9  -4   1    7.30   21.90 
   9  -4  -1    8.90   15.40 
   9  -4  -1   10.00   26.00 
  -9  -4   1   32.60   15.00 
  -9   4   1   48.70   24.70 
   9   4  -1  -20.80   16.60 
  -9   4   1  -21.70   13.60 
   9   4  -1   -8.90   27.80 
  -9   4   1   -6.20   22.70 
  -8  -4   1    4.80   21.40 
  -8  -4   1   41.30   20.60 
   8  -4  -1   -7.20   14.00 
  -8  -4   1   -0.60   13.00 
   8  -4  -1  -15.40   20.70 
   8  -4  -1   16.90   12.80 
   8   4  -1  -15.30   23.10 
  -8   4   1   23.40   19.70 
   8   4  -1   -3.50   15.20 
  -8   4   1  -10.00   12.60 
  -8   4   1    3.00   22.80 
   8   4  -1   11.60   15.60 
  -7  -4   1   13.10   19.30 
   7  -4  -1   -0.40   20.40 
   7  -4  -1   -7.00   12.20 
   7  -4  -1   10.10   10.10 
  -7  -4   1  -18.00   16.40 
  -7  -4   1    5.80   10.70 
  -7  -4   1   13.90   16.40 
  -7   4   1   28.50   17.00 
  -7   4   1   -8.90   18.60 
  -7   4   1    9.80   16.40 
   7   4  -1   -5.30   14.00 
   7   4  -1   -4.90   19.10 
   7   4  -1  -14.10   12.40 
  -7   4   1    4.80   10.50 
   6  -4  -1    8.80   11.10 
  -6  -4   1   19.20   17.90 
  -6  -4   1   16.10   15.00 
  -6  -4   1   20.10   13.70 
   6  -4  -1   15.10    8.80 
  -6  -4   1   16.40    9.90 
   6  -4  -1    7.00   15.90 
  -6   4   1   29.80   10.20 
   6   4  -1   25.10   12.30 
   6   4  -1   32.50   19.70 
  -6   4   1   37.60   16.30 
  -6   4   1   36.20   14.10 
   6   4  -1   13.20   12.10 
  -6   4   1   30.80   15.00 
  -5  -4   1  183.28   16.60 
  -5  -4   1  165.38   18.30 
  -5  -4   1  197.38   20.20 
   5  -4  -1  164.18   15.60 
  -5  -4   1  199.68   22.50 
   5  -4  -1  140.29   18.70 
  -5   4   1  168.58   20.80 
  -5   4   1  153.48   18.30 
  -5   4   1  162.48   21.20 
   5   4  -1  176.28   18.60 
   5   4  -1  159.78   19.70 
   5   4  -1  184.98   23.10 
   4  -4  -1  717.63   29.20 
  -4  -4   1  757.52   29.70 
   4  -4  -1  739.23   28.70 
  -4  -4   1  747.33   33.20 
  -4  -4   1  760.12   30.10 
  -4  -4   1  852.91   36.40 
   4  -4  -1  754.92   35.60 
  -4   4   1  765.82   34.20 
  -4   4   1  727.33   29.80 
  -4   4   1  755.52   28.90 
   4   4  -1  788.92   32.40 
  -4   4   1  780.92   34.90 
   4   4  -1  734.63   30.10 
   4   4  -1  721.33   36.20 
   3  -4  -1  130.89   12.70 
   3  -4  -1  157.58   14.50 
  -3  -4   1  136.09   14.60 
  -3  -4   1  161.88   13.00 
  -3  -4   1  140.39   11.70 
   3  -4  -1  155.98   10.40 
   3  -4  -1  127.19   15.50 
  -3  -4   1  162.88   18.50 
  -3   4   1  152.98   12.50 
   3   4  -1  156.08   11.60 
  -3   4   1  159.48   12.00 
   3   4  -1  146.09   14.40 
  -3   4   1  142.79   14.70 
   3   4  -1  134.99   13.20 
  -3   4   1  166.48   17.20 
   3   4  -1  123.69   16.40 
   2  -4  -1  201.28   14.30 
   2  -4  -1  211.88   15.50 
   2  -4  -1  214.18    9.90 
  -2  -4   1  226.08   15.20 
  -2  -4   1  248.08   18.60 
   2  -4  -1  200.98   17.70 
  -2  -4   1  175.28   15.00 
  -2  -4   1  213.28   12.60 
  -2   4   1  177.08   14.20 
   2   4  -1  206.88   19.60 
   2   4  -1  208.08   12.10 
  -2   4   1  200.28   16.50 
  -2   4   1  224.88   11.20 
   2   4  -1  190.58   15.60 
  -1  -4   1   14.80    4.40 
   1  -4  -1    2.80    5.00 
  -1  -4   1   24.00    5.60 
  -1  -4   1    9.60    5.30 
   1  -4  -1   19.60    6.60 
  -1  -4   1   19.30    5.80 
   1  -4  -1   13.80    6.00 
   1   4  -1   15.60    5.70 
   1   4  -1    3.50    4.70 
   1   4  -1   24.30    6.30 
   1   4  -1   15.00    4.20 
  -1   4   1   21.40    6.10 
  -1   4   1   13.30    6.10 
  -1   4   1   10.80    5.00 
  -1   4   1   10.50    2.00 
   0  -4  -1  327.27   13.60 
   0  -4   1  342.57   13.00 
   0  -4  -1  367.46   13.40 
   0  -4   1  338.87   14.30 
   0  -4  -1  339.07   13.70 
   0  -4  -1  349.57   14.10 
   0   4  -1  338.57   12.20 
   0   4   1  350.86   13.40 
   0   4   1  337.77   14.30 
   0   4  -1  322.37   14.00 
   0   4  -1  358.06   13.30 
   0   4   1  359.76   13.50 
   0   4   1  356.26   13.80 
  -1  -4  -1  934.51   29.90 
  -1  -4  -1  969.20   32.30 
   1  -4   1  859.91   30.30 
  -1  -4  -1  922.31   29.90 
  -1  -4  -1  943.91   33.40 
   1  -4   1  874.21   31.00 
   1   4   1  930.01   33.10 
   1   4   1  925.81   30.00 
   1   4   1  905.11   32.50 
   1   4   1  910.11   29.80 
  -1   4  -1  932.11   30.30 
  -1   4  -1  916.91   28.30 
  -1   4  -1  902.51   31.70 
  -2  -4  -1   82.99   12.20 
   2  -4   1   73.99    9.10 
   2  -4   1   68.39    9.50 
   2  -4   1   64.39    5.50 
  -2  -4  -1   89.59   11.30 
  -2   4  -1   69.99    9.60 
   2   4   1   70.89    8.50 
   2   4   1   70.99   12.20 
  -2   4  -1   62.19    8.70 
  -2   4  -1   67.59    6.10 
   2   4   1   87.89   11.90 
   3  -4   1  942.81   34.10 
   3  -4   1  835.32   34.50 
   3  -4   1  895.11   28.10 
  -3  -4  -1  868.31   37.00 
  -3  -4  -1  907.01   30.40 
   3   4   1  906.71   35.70 
   3   4   1  905.21   30.50 
  -3   4  -1  883.91   34.60 
  -3   4  -1  952.20   34.90 
  -3   4  -1  859.61   28.10 
   4  -4   1  253.07   12.50 
   4  -4   1  271.67   22.90 
  -4  -4  -1  256.67   14.50 
   4  -4   1  270.07   19.00 
  -4  -4  -1  272.77   25.70 
  -4  -4  -1  285.57   25.20 
   4   4   1  201.28   25.50 
  -4   4  -1  262.27   12.70 
   4   4   1  252.87   23.20 
   4   4   1  271.87   15.60 
  -4   4  -1  243.78   22.60 
  -4   4  -1  271.87   24.00 
   5  -4   1    8.70   13.80 
  -5  -4  -1   -5.30   14.90 
  -5  -4  -1   -3.60   15.40 
   5  -4   1    3.20    5.70 
   5  -4   1   -4.80    8.70 
  -5  -4  -1  -11.10    5.90 
  -5   4  -1   10.60   14.00 
  -5   4  -1    7.40    5.90 
   5   4   1    7.10    7.40 
   5   4   1  -14.80   15.60 
  -5   4  -1   -2.70   14.00 
   5   4   1   -3.50   12.40 
  -6  -4  -1  183.58   23.90 
   6  -4   1  215.48   25.00 
   6  -4   1  223.08   14.50 
  -6  -4  -1  216.98   29.70 
   6  -4   1  212.28   20.80 
  -6   4  -1  237.78   28.30 
  -6   4  -1  180.08   13.50 
   6   4   1  216.48   24.10 
  -6   4  -1  205.38   24.00 
   6   4   1  281.57   24.50 
   6   4   1  233.98   28.50 
  -7  -4  -1   51.09   31.60 
   7  -4   1   97.79   11.30 
   7  -4   1   86.49   15.20 
  -7  -4  -1   88.09   24.50 
   7  -4   1   69.29   24.10 
  -7  -4  -1  102.89   21.80 
  -7  -4  -1   89.39   12.10 
  -7   4  -1   64.89   22.50 
  -7   4  -1   86.69    9.50 
  -7   4  -1   77.69   21.80 
   7   4   1   61.59   25.60 
   7   4   1   48.50   16.70 
  -7   4  -1   91.09   22.50 
   7   4   1   75.79   13.70 
   8  -4   1   32.70   10.50 
   8  -4   1   28.90   25.00 
  -8  -4  -1   12.90   10.20 
  -8  -4  -1   41.60   20.80 
  -8  -4  -1    8.80   26.00 
  -8   4  -1   21.70   23.70 
  -8   4  -1   27.40    9.40 
  -8   4  -1   49.30   25.20 
   8   4   1   30.70   13.40 
   8   4   1   55.89   26.80 
   9  -4   1   -0.80   12.00 
  -9  -4  -1   16.70   11.80 
   9  -4   1   16.70   29.80 
  -9  -4  -1   22.80   23.50 
  -9  -4  -1   18.90   28.90 
   9   4   1    3.20   15.00 
  -9   4  -1   -2.00   10.30 
   9   4   1  -14.90   27.40 
  -9   4  -1   27.20   27.90 
  -9   4  -1  -19.10   25.50 
 -10  -4  -1  -41.00   27.20 
  10  -4   1   30.50   13.10 
  10   4   1   26.30   17.50 
  10   4   1   11.00   31.30 
 -10   4  -1  -33.70   32.80 
 -10   4  -1   16.80   30.50 
 -11  -4  -1   20.40   31.60 
  11  -4   1   18.20   36.00 
 -11  -4  -1   77.29   40.10 
  11   4   1   94.99   39.70 
 -11   4  -1   36.70   34.90 
 -11   4  -1   28.10   36.10 
  11   4   1   38.60   19.80 
 -12  -5   1   61.69   38.70 
  12  -5  -1   -9.10   41.20 
  12  -5  -1  -10.80   23.90 
 -12  -5   1   -7.20   39.50 
 -12   5   1   44.30   36.10 
 -12   5   1   64.89   40.40 
  12   5  -1   40.10   45.60 
  12   5  -1    4.50   24.90 
 -11  -5   1  348.27   52.99 
  11  -5  -1  440.46   38.30 
 -11  -5   1  392.76   50.19 
  11  -5  -1  451.35   52.09 
 -11   5   1  394.26   43.30 
  11   5  -1  485.65   62.39 
 -11   5   1  288.37   42.80 
  11   5  -1  385.66   41.30 
 -10  -5   1  898.61   59.69 
  10  -5  -1  890.01   63.99 
 -10  -5   1  868.21   43.60 
  10  -5  -1  927.71   46.60 
 -10  -5   1  905.91   56.09 
 -10   5   1  908.81   51.49 
  10   5  -1  887.81   48.00 
 -10   5   1  959.40   62.39 
 -10   5   1  919.11   56.59 
  -9  -5   1  343.67   44.00 
   9  -5  -1  321.07   44.20 
  -9  -5   1  430.26   38.30 
   9  -5  -1  397.16   30.60 
   9  -5  -1  284.07   28.80 
  -9  -5   1  357.36   28.50 
  -9   5   1  389.06   41.60 
  -9   5   1  337.27   28.20 
   9   5  -1  362.76   33.70 
  -9   5   1  348.97   43.90 
   9   5  -1  353.16   42.80 
   8  -5  -1  121.19   28.00 
  -8  -5   1  146.99   24.50 
   8  -5  -1  144.89   18.10 
  -8  -5   1  142.09   27.40 
   8  -5  -1  112.69   17.50 
  -8  -5   1   94.99   17.40 
   8   5  -1  135.89   28.70 
  -8   5   1  144.39   17.40 
  -8   5   1  142.79   26.20 
   8   5  -1  139.89   22.70 
   8   5  -1  174.28   20.80 
  -8   5   1  141.29   24.00 
  -7  -5   1 1612.74   66.29 
  -7  -5   1 1569.54   61.99 
   7  -5  -1 1651.93   58.89 
   7  -5  -1 1584.04   57.49 
  -7  -5   1 1521.35   68.29 
   7  -5  -1 1667.43   69.89 
  -7  -5   1 1650.43   57.69 
  -7   5   1 1631.84   62.39 
  -7   5   1 1662.63   56.49 
   7   5  -1 1517.25   69.39 
   7   5  -1 1606.74   59.29 
   7   5  -1 1684.53   62.89 
  -7   5   1 1497.75   66.79 
  -7   5   1 1588.84   66.29 
   6  -5  -1 1538.65   63.89 
   6  -5  -1 1632.14   55.79 
  -6  -5   1 1590.14   61.59 
  -6  -5   1 1614.74   55.09 
   6  -5  -1 1531.85   54.59 
  -6  -5   1 1531.65   57.59 
   6   5  -1 1520.45   58.59 
  -6   5   1 1534.25   53.49 
   6   5  -1 1484.25   64.39 
  -6   5   1 1629.14   63.19 
   6   5  -1 1554.84   56.39 
  -6   5   1 1564.74   64.39 
  -6   5   1 1562.34   57.99 
   5  -5  -1  390.36   30.40 
  -5  -5   1  501.65   31.70 
  -5  -5   1  458.25   22.90 
  -5  -5   1  404.46   29.00 
   5  -5  -1  401.26   26.50 
   5   5  -1  386.76   30.30 
   5   5  -1  442.36   26.50 
  -5   5   1  419.96   29.70 
   5   5  -1  449.86   25.10 
  -5   5   1  427.66   29.50 
  -5   5   1  438.16   28.70 
  -4  -5   1  357.56   23.70 
  -4  -5   1  351.06   25.30 
   4  -5  -1  336.17   25.10 
   4  -5  -1  340.27   17.40 
   4  -5  -1  346.17   18.30 
  -4  -5   1  332.87   18.60 
  -4   5   1  342.37   26.20 
   4   5  -1  310.67   26.80 
  -4   5   1  358.46   19.30 
  -4   5   1  349.57   24.10 
   4   5  -1  335.67   22.40 
  -4   5   1  355.96   18.40 
   3  -5  -1 1774.22   57.89 
  -3  -5   1 1981.00   62.59 
   3  -5  -1 1776.12   60.89 
   3  -5  -1 1794.02   56.49 
  -3  -5   1 1891.11   58.99 
   3  -5  -1 1896.21   61.49 
  -3  -5   1 1838.62   57.19 
  -3  -5   1 1758.42   59.79 
  -3   5   1 1793.72   61.19 
   3   5  -1 1865.91   59.19 
   3   5  -1 1915.01   60.59 
  -3   5   1 1703.83   56.69 
  -3   5   1 1868.81   62.09 
  -3   5   1 1918.01   58.39 
   3   5  -1 1807.22   62.39 
   3   5  -1 1843.52   57.19 
   2  -5  -1 2658.13   80.19 
   2  -5  -1 2716.73   85.09 
  -2  -5   1 2890.51   85.19 
  -2  -5   1 2750.52   80.99 
   2  -5  -1 2804.72   84.79 
  -2  -5   1 2500.85   83.39 
   2  -5  -1 2690.23   82.79 
  -2  -5   1 2756.82   83.39 
  -2   5   1 2779.42   82.99 
   2   5  -1 2773.12   83.79 
  -2   5   1 2623.34   80.29 
  -2   5   1 2792.22   85.19 
  -2   5   1 2883.81   85.09 
   2   5  -1 2780.72   85.29 
   2   5  -1 2587.64   83.59 
   2   5  -1 2802.62   80.99 
   1  -5  -1   47.20    7.20 
   1  -5  -1   56.49    8.60 
  -1  -5   1   58.19    8.00 
  -1  -5   1   54.99    5.80 
   1  -5  -1   60.29    8.00 
  -1  -5   1   60.89    7.50 
  -1  -5   1   55.39    7.50 
   1   5  -1   78.19    9.00 
   1   5  -1   57.39    7.90 
  -1   5   1   58.39    7.20 
  -1   5   1   69.39    8.90 
  -1   5   1   62.89    8.70 
   1   5  -1   96.39   11.50 
   1   5  -1   61.09    5.80 
  -1   5   1   43.00    4.90 
   0  -5  -1  157.58   11.20 
   0  -5  -1  126.19   10.20 
   0  -5  -1  135.89   10.60 
   0  -5  -1  149.39    9.90 
   0  -5   1  119.19   10.10 
   0  -5   1  153.48    9.20 
   0   5   1  140.99   10.30 
   0   5  -1  140.79   10.00 
   0   5  -1  148.59   10.70 
   0   5   1  150.48   10.00 
   0   5  -1  150.38    9.00 
   0   5   1  139.49    9.90 
   0   5   1  151.28   11.70 
  -1  -5  -1 3717.63  113.99 
  -1  -5  -1 3905.41  113.89 
  -1  -5  -1 3856.11  111.09 
  -1  -5  -1 3710.33  111.99 
   1  -5   1 3881.71  112.29 
   1  -5   1 3755.02  112.99 
   1   5   1 3949.20  112.29 
   1   5   1 3725.63  113.99 
   1   5   1 3791.02  113.89 
  -1   5  -1 3873.91  112.19 
  -1   5  -1 3572.74  112.99 
  -1   5  -1 3784.62  110.79 
   1   5   1 3893.71  111.19 
  -2  -5  -1 2330.37   73.79 
   2  -5   1 2092.89   71.09 
   2  -5   1 2260.27   71.59 
  -2  -5  -1 2425.06   73.39 
   2  -5   1 2280.77   67.79 
   2   5   1 2410.86   73.69 
  -2   5  -1 2292.27   71.89 
   2   5   1 2312.27   69.69 
  -2   5  -1 2294.37   67.89 
   2   5   1 2294.97   69.59 
   2   5   1 2265.17   73.49 
  -2   5  -1 2336.67   71.59 
   3  -5   1   13.30    7.60 
  -3  -5  -1    9.40   11.60 
   3  -5   1   15.20    8.80 
   3  -5   1   10.90    4.10 
  -3  -5  -1    9.50   10.00 
  -3   5  -1    2.50    8.10 
   3   5   1   12.10   12.10 
   3   5   1   20.10    9.80 
  -3   5  -1    7.90    4.10 
  -3   5  -1   18.50    9.00 
   3   5   1   16.50    6.20 
  -4  -5  -1 1142.49   45.20 
  -4  -5  -1 1079.19   46.60 
  -4  -5  -1 1111.39   37.20 
   4  -5   1 1104.79   34.80 
   4  -5   1 1034.30   43.80 
   4  -5   1 1107.39   41.00 
  -4   5  -1 1062.79   43.50 
  -4   5  -1 1094.19   34.90 
  -4   5  -1 1047.80   42.70 
   4   5   1 1077.99   37.50 
   4   5   1  985.80   45.60 
   4   5   1 1135.59   44.90 
   5  -5   1 2339.87   69.79 
  -5  -5  -1 2245.38   71.69 
   5  -5   1 2267.37   80.29 
   5  -5   1 2359.56   77.49 
  -5  -5  -1 2138.69   80.49 
  -5  -5  -1 2410.76   81.89 
   5   5   1 2331.57   79.79 
  -5   5  -1 2320.37   69.79 
  -5   5  -1 2310.67   79.29 
   5   5   1 2323.67   72.29 
  -5   5  -1 2283.87   79.39 
   5   5   1 2092.89   80.79 
  -6  -5  -1  766.32   43.30 
  -6  -5  -1  796.72   30.80 
   6  -5   1  749.53   36.60 
   6  -5   1  790.62   28.80 
   6  -5   1  821.92   44.00 
  -6  -5  -1  745.63   43.10 
  -6  -5  -1  785.02   39.70 
  -6   5  -1  854.11   49.00 
   6   5   1  794.72   32.80 
   6   5   1  697.03   43.40 
  -6   5  -1  759.02   28.40 
   6   5   1  809.12   39.10 
  -6   5  -1  804.62   42.80 
  -7  -5  -1   15.00    9.80 
  -7  -5  -1    6.80   22.30 
  -7  -5  -1  -21.80   22.30 
   7  -5   1   -0.10   20.00 
   7  -5   1   11.80    8.30 
   7  -5   1   15.90   13.10 
  -7  -5  -1   55.99   18.80 
  -7   5  -1   14.50    8.40 
  -7   5  -1   32.80   21.30 
  -7   5  -1   28.20   18.50 
  -7   5  -1    3.10   21.40 
   7   5   1   30.50   23.40 
   7   5   1   16.00   12.50 
   7   5   1   27.00   14.60 
  -8  -5  -1  925.61   37.10 
   8  -5   1 1076.19   53.89 
  -8  -5  -1  887.51   56.69 
   8  -5   1  945.61   35.30 
   8  -5   1  905.31   56.09 
  -8  -5  -1  950.30   50.09 
   8   5   1  865.81   57.59 
  -8   5  -1  901.41   55.29 
  -8   5  -1  944.81   55.99 
   8   5   1  965.60   40.90 
  -8   5  -1  952.80   34.80 
   9  -5   1  844.72   60.39 
  -9  -5  -1  846.12   37.20 
  -9  -5  -1  957.30   60.49 
  -9  -5  -1  895.01   53.19 
   9  -5   1  888.31   42.30 
  -9   5  -1  862.61   58.29 
  -9   5  -1  883.81   58.09 
   9   5   1  909.61   42.40 
   9   5   1  875.11   62.39 
 -10  -5  -1  189.88   34.20 
  10  -5   1  135.29   15.40 
 -10  -5  -1  132.79   42.40 
  10   5   1  152.88   37.50 
 -10   5  -1  143.79   35.40 
  10   5   1  171.48   22.50 
 -10   5  -1  112.49   36.70 
  11  -5   1   93.19   39.70 
 -11  -5  -1  106.59   41.00 
 -11  -5  -1   24.10   31.00 
  11   5   1   63.89   40.20 
 -11   5  -1  107.89   37.00 
  11   5   1   57.59   20.90 
 -11   5  -1   45.20   39.20 
 -12  -6   1  832.62   68.99 
 -12  -6   1  761.62   63.79 
  12  -6  -1  639.34   76.19 
  12   6  -1  779.62   51.79 
  12   6  -1  798.82   82.09 
 -12   6   1  788.62   67.79 
 -12   6   1  628.04   70.59 
  11  -6  -1  215.28   45.90 
 -11  -6   1  241.28   37.20 
  11  -6  -1  186.48   26.60 
 -11  -6   1  267.87   40.30 
 -11   6   1  249.97   38.70 
 -11   6   1  238.28   44.50 
  11   6  -1  227.68   28.80 
  11   6  -1  226.28   44.60 
  10  -6  -1   87.59   31.70 
 -10  -6   1  149.79   29.30 
 -10  -6   1   55.99   30.10 
  10  -6  -1   63.89   19.70 
 -10  -6   1   73.59   18.30 
 -10   6   1   60.99   26.90 
  10   6  -1   88.49   23.50 
 -10   6   1   70.69   25.60 
 -10   6   1   32.50   32.40 
   9  -6  -1  767.32   55.19 
   9  -6  -1  796.52   40.50 
  -9  -6   1  726.13   38.00 
   9  -6  -1  801.52   40.40 
  -9  -6   1  779.92   47.10 
  -9  -6   1  790.02   53.69 
   9   6  -1  747.63   42.60 
  -9   6   1  716.43   53.39 
   9   6  -1  709.13   56.19 
  -9   6   1  822.12   49.80 
  -9   6   1  712.23   36.10 
   8  -6  -1 1193.08   48.60 
   8  -6  -1 1203.28   49.99 
  -8  -6   1 1219.78   60.69 
   8  -6  -1 1138.09   61.99 
  -8  -6   1 1242.08   48.90 
  -8  -6   1 1213.18   54.99 
   8   6  -1 1137.39   54.19 
  -8   6   1 1265.97   57.09 
  -8   6   1 1282.57   47.90 
  -8   6   1 1221.68   61.99 
   8   6  -1 1247.78   51.69 
   8   6  -1 1098.89   64.59 
  -7  -6   1  394.56   31.30 
   7  -6  -1  426.16   26.40 
   7  -6  -1  398.26   25.50 
  -7  -6   1  394.86   25.70 
  -7  -6   1  394.66   36.10 
   7  -6  -1  359.06   36.60 
  -7   6   1  411.66   38.40 
  -7   6   1  414.06   32.30 
   7   6  -1  363.86   30.80 
   7   6  -1  359.76   39.10 
  -7   6   1  419.26   35.10 
  -7   6   1  432.96   24.50 
   7   6  -1  434.46   28.90 
   6  -6  -1  487.65   24.80 
  -6  -6   1  472.25   28.50 
   6  -6  -1  455.25   34.00 
   6  -6  -1  478.95   25.50 
  -6  -6   1  434.56   34.80 
  -6  -6   1  486.95   25.50 
  -6  -6   1  429.36   31.70 
  -6   6   1  487.45   29.80 
  -6   6   1  468.85   35.50 
   6   6  -1  457.15   27.30 
   6   6  -1  459.15   30.10 
  -6   6   1  502.35   24.50 
   6   6  -1  464.25   36.40 
   5  -6  -1 2621.34   89.79 
  -5  -6   1 2527.15   87.29 
   5  -6  -1 2586.84   82.79 
  -5  -6   1 2639.14   83.79 
  -5  -6   1 2704.03   90.59 
  -5  -6   1 2666.33   83.49 
  -5   6   1 2577.94   90.69 
   5   6  -1 2552.24   90.59 
   5   6  -1 2669.33   87.09 
  -5   6   1 2630.54   88.89 
   5   6  -1 2644.84   84.59 
  -5   6   1 2518.35   82.59 
   4  -6  -1 1595.04   59.59 
   4  -6  -1 1693.83   53.79 
  -4  -6   1 1520.35   57.89 
  -4  -6   1 1719.53   55.59 
  -4  -6   1 1700.73   54.29 
  -4  -6   1 1821.12   61.49 
   4  -6  -1 1634.24   54.69 
   4   6  -1 1597.04   61.09 
  -4   6   1 1738.73   54.79 
  -4   6   1 1705.73   59.79 
  -4   6   1 1627.64   54.39 
   4   6  -1 1666.23   57.89 
   4   6  -1 1572.94   56.09 
  -4   6   1 1668.73   60.79 
   3  -6  -1  749.62   27.40 
  -3  -6   1  736.63   28.10 
  -3  -6   1  783.22   32.00 
   3  -6  -1  733.43   25.20 
  -3  -6   1  675.93   29.20 
  -3  -6   1  775.02   26.00 
   3   6  -1  714.83   29.00 
   3   6  -1  628.14   36.30 
   3   6  -1  741.23   25.60 
  -3   6   1  715.63   25.70 
  -3   6   1  720.23   27.30 
  -3   6   1  707.43   31.50 
   3   6  -1  753.82   29.00 
   2  -6  -1  981.60   34.80 
  -2  -6   1 1002.50   31.90 
   2  -6  -1 1041.40   36.80 
  -2  -6   1 1043.30   35.40 
  -2  -6   1  956.50   36.20 
   2  -6  -1 1037.30   36.90 
   2  -6  -1 1045.00   31.50 
   2   6  -1 1047.20   32.00 
   2   6  -1  978.80   35.60 
  -2   6   1  998.90   36.80 
  -2   6   1 1016.30   36.70 
  -2   6   1 1050.59   35.00 
  -2   6   1 1014.80   31.80 
   1  -6  -1  956.90   32.00 
  -1  -6   1  822.02   31.60 
  -1  -6   1  882.81   28.40 
   1  -6  -1  840.12   27.40 
   1  -6  -1  887.21   31.40 
  -1  -6   1  905.61   31.10 
   1  -6  -1  896.41   32.40 
   1   6  -1  853.21   31.40 
  -1   6   1  938.21   32.40 
   1   6  -1  882.61   31.50 
  -1   6   1  861.31   27.50 
   1   6  -1  940.71   28.50 
   1   6  -1  874.51   31.30 
  -1   6   1  899.81   31.70 
  -1   6   1  920.31   31.20 
   0  -6  -1 3009.40   91.79 
   0  -6  -1 3170.58   92.79 
   0  -6   1 3061.69   92.99 
   0  -6  -1 3222.28   93.49 
   0  -6   1 3079.29   91.79 
   0  -6  -1 3238.58   91.59 
   0   6   1 3166.08   91.49 
   0   6   1 3021.00   91.89 
   0   6   1 3095.39   92.59 
   0   6  -1 3052.09   92.79 
   0   6  -1 3035.10   91.99 
   0   6  -1 3048.09   91.59 
   0   6   1 3044.20   93.39 
   1  -6   1  131.19   11.50 
  -1  -6  -1  117.39   13.90 
  -1  -6  -1  120.49   11.80 
  -1  -6  -1  117.49    9.40 
  -1  -6  -1  102.69   12.40 
  -1   6  -1  116.39   12.80 
   1   6   1  122.69   15.10 
   1   6   1  145.09   15.10 
  -1   6  -1  131.49   11.50 
   1   6   1  140.69   11.80 
  -1   6  -1  137.09    9.20 
   1   6   1  125.49    9.60 
  -2  -6  -1  694.13   23.50 
   2  -6   1  678.23   26.50 
   2  -6   1  624.64   25.50 
  -2  -6  -1  622.64   28.10 
  -2  -6  -1  718.33   28.30 
   2  -6   1  682.53   22.50 
  -2   6  -1  668.93   22.40 
   2   6   1  672.93   28.40 
   2   6   1  658.83   24.30 
  -2   6  -1  672.53   26.10 
   2   6   1  701.03   29.30 
  -2   6  -1  682.93   26.80 
   2   6   1  637.74   24.20 
   3  -6   1 3799.82  119.79 
  -3  -6  -1 3735.93  121.09 
  -3  -6  -1 4132.09  121.89 
   3  -6   1 3900.91  114.39 
   3  -6   1 3983.20  119.89 
   3   6   1 4001.60  122.59 
   3   6   1 3915.41  116.69 
  -3   6  -1 3902.61  119.89 
  -3   6  -1 4032.20  114.79 
   3   6   1 4073.69  121.79 
  -3   6  -1 3521.95  122.19 
   4  -6   1 1408.06   50.79 
  -4  -6  -1 1543.15   56.09 
  -4  -6  -1 1331.77   55.09 
   4  -6   1 1468.05   45.30 
   4  -6   1 1429.26   53.59 
  -4  -6  -1 1461.05   47.90 
   4   6   1 1434.86   57.09 
   4   6   1 1437.86   47.90 
  -4   6  -1 1449.85   53.29 
  -4   6  -1 1477.45   53.59 
  -4   6  -1 1384.46   45.10 
   4   6   1 1530.35   55.09 
   5  -6   1   91.49   10.10 
   5  -6   1   83.59   17.10 
  -5  -6  -1   90.89   18.80 
  -5  -6  -1  107.49   19.80 
   5  -6   1   96.59   12.80 
  -5   6  -1   94.29    8.90 
   5   6   1   76.59   18.50 
  -5   6  -1  119.49   18.10 
  -5   6  -1   82.69   16.80 
   5   6   1   89.69   16.10 
  -6  -6  -1  933.91   34.90 
   6  -6   1  949.51   40.00 
  -6  -6  -1  901.61   47.00 
  -6  -6  -1  899.11   41.70 
   6  -6   1  929.21   32.30 
   6  -6   1  886.01   46.90 
  -6  -6  -1  917.81   48.40 
   6   6   1  926.01   45.00 
   6   6   1  887.11   48.90 
  -6   6  -1  868.31   46.80 
  -6   6  -1  899.11   46.20 
  -6   6  -1  937.61   32.20 
   6   6   1  907.51   36.80 
  -7  -6  -1 1333.47   47.50 
  -7  -6  -1 1313.67   57.09 
   7  -6   1 1253.67   62.69 
  -7  -6  -1 1279.37   62.09 
  -7  -6  -1 1333.17   62.59 
   7  -6   1 1375.46   54.79 
   7  -6   1 1345.67   44.80 
  -7   6  -1 1326.87   61.19 
  -7   6  -1 1296.67   58.89 
   7   6   1 1296.77   64.79 
   7   6   1 1372.76   49.30 
  -7   6  -1 1253.07   62.19 
   7   6   1 1391.26   58.59 
  -7   6  -1 1330.27   44.50 
   8  -6   1  406.16   44.10 
  -8  -6  -1  489.25   48.00 
   8  -6   1  464.45   37.90 
  -8  -6  -1  520.65   26.30 
  -8  -6  -1  489.45   39.00 
   8  -6   1  464.95   22.40 
  -8   6  -1  544.05   46.20 
  -8   6  -1  485.55   43.90 
   8   6   1  444.76   48.60 
  -8   6  -1  439.56   22.20 
   8   6   1  448.06   29.90 
  -9  -6  -1   51.79   31.30 
   9  -6   1   31.60   27.90 
  -9  -6  -1   52.99   24.90 
   9   6   1   33.50   28.90 
   9   6   1   41.80   16.80 
  -9   6  -1   45.50   27.40 
  -9   6  -1   13.10   28.60 
  10  -6   1  724.53   34.50 
 -10  -6  -1  719.83   53.69 
 -10  -6  -1  740.83   60.99 
  10   6   1  737.23   42.50 
 -10   6  -1  850.71   60.29 
  10   6   1  731.43   64.09 
 -11  -6  -1  623.84   54.29 
 -11  -6  -1  628.24   68.39 
  11  -6   1  749.13   69.39 
  11   6   1  600.44   68.19 
 -11   6  -1  604.14   63.29 
  11   6   1  713.53   42.70 
 -11   6  -1  616.84   65.59 
 -12  -7   1   72.29   39.60 
  12  -7  -1   94.49   44.60 
 -12  -7   1   24.40   32.90 
  12   7  -1   65.59   45.60 
 -12   7   1   95.49   63.89 
  12   7  -1   40.50   26.00 
 -12   7   1   30.90   38.80 
  11  -7  -1  267.17   46.50 
 -11  -7   1  223.78   41.40 
  11  -7  -1  333.67   35.20 
 -11  -7   1  211.48   35.50 
  11   7  -1  264.67   50.09 
 -11   7   1  269.37   39.20 
  11   7  -1  229.58   30.40 
 -11   7   1  179.88   40.40 
  10  -7  -1   38.80   37.40 
 -10  -7   1   91.49   30.60 
  10  -7  -1   33.30   19.00 
 -10  -7   1   45.70   18.40 
 -10  -7   1   65.29   25.90 
  10   7  -1   64.99   22.50 
 -10   7   1   29.70   22.30 
 -10   7   1   36.00   30.70 
 -10   7   1   44.00   28.10 
  10   7  -1   42.00   40.90 
   9  -7  -1   90.99   30.70 
   9  -7  -1   76.39   18.80 
   9  -7  -1  115.79   18.10 
  -9  -7   1   88.49   24.50 
  -9  -7   1  108.39   28.90 
  -9  -7   1   72.99   17.00 
  -9   7   1  102.19   30.30 
   9   7  -1   78.99   29.10 
  -9   7   1   93.19   16.20 
  -9   7   1   96.89   24.40 
   9   7  -1  127.79   22.50 
  -8  -7   1   -1.30   21.10 
   8  -7  -1   28.40   13.70 
   8  -7  -1    1.30   24.10 
   8  -7  -1   10.00   14.40 
  -8  -7   1    6.70   18.30 
   8   7  -1   -6.80   17.00 
   8   7  -1    2.20   19.10 
  -8   7   1    3.90   12.30 
   8   7  -1  -17.20   23.90 
  -8   7   1   -2.50   19.90 
  -8   7   1   38.10   25.90 
   7  -7  -1   37.20   12.40 
   7  -7  -1   65.89   21.60 
  -7  -7   1   59.79   13.10 
  -7  -7   1   69.99   17.20 
  -7  -7   1   64.19   22.00 
  -7  -7   1    9.30   20.80 
   7  -7  -1   72.69   14.10 
   7   7  -1   41.40   16.70 
  -7   7   1   46.40   22.80 
  -7   7   1   52.89   17.90 
   7   7  -1   53.99   15.80 
  -7   7   1   64.49   12.60 
   7   7  -1   40.10   21.90 
  -7   7   1   66.69   18.30 
  -6  -7   1  216.08   27.30 
   6  -7  -1  188.88   19.50 
   6  -7  -1  223.88   17.70 
  -6  -7   1  220.58   24.60 
  -6  -7   1  157.98   18.20 
  -6  -7   1  202.68   21.30 
   6  -7  -1  218.48   25.70 
   6   7  -1  165.58   23.60 
   6   7  -1  179.08   18.50 
  -6   7   1  167.08   17.50 
   6   7  -1  218.68   21.80 
  -6   7   1  203.28   23.80 
  -6   7   1  157.88   23.90 
   5  -7  -1   56.79   10.70 
   5  -7  -1   45.80   10.80 
   5  -7  -1   44.70   16.00 
  -5  -7   1   63.09   11.00 
  -5  -7   1   56.89   11.50 
  -5  -7   1   45.10   16.50 
  -5  -7   1   69.79   16.60 
  -5   7   1   73.09   18.70 
   5   7  -1   88.49   14.30 
  -5   7   1   57.99   10.50 
  -5   7   1   71.29   16.10 
   5   7  -1   51.89   12.00 
   5   7  -1   43.50   18.20 
  -4  -7   1  109.19   12.50 
  -4  -7   1  103.79   15.70 
   4  -7  -1   89.99   11.20 
   4  -7  -1   98.29   16.40 
  -4  -7   1  101.99   17.20 
   4  -7  -1   95.69   11.10 
  -4  -7   1   89.19   10.10 
   4   7  -1   84.29   12.90 
   4   7  -1   65.39   17.90 
  -4   7   1  102.19   11.10 
  -4   7   1   67.19   15.90 
  -4   7   1   70.19   10.60 
   4   7  -1   97.89   14.20 
  -4   7   1   80.39   14.10 
  -3  -7   1  676.23   33.70 
  -3  -7   1  763.52   25.60 
   3  -7  -1  678.03   32.30 
   3  -7  -1  688.83   27.50 
   3  -7  -1  755.42   25.40 
  -3  -7   1  764.42   28.80 
   3   7  -1  747.03   25.30 
   3   7  -1  758.62   29.50 
  -3   7   1  770.52   33.40 
  -3   7   1  690.33   34.30 
  -3   7   1  751.92   28.20 
   3   7  -1  707.73   37.20 
  -3   7   1  727.43   25.80 
   2  -7  -1 1029.10   36.60 
  -2  -7   1 1023.00   36.20 
  -2  -7   1 1017.90   30.90 
  -2  -7   1 1028.00   35.10 
   2  -7  -1  961.90   36.10 
   2  -7  -1  926.41   34.10 
  -2  -7   1  943.31   35.80 
  -2   7   1 1010.30   36.70 
  -2   7   1 1023.30   34.30 
  -2   7   1 1002.70   31.00 
   2   7  -1 1039.60   37.50 
   2   7  -1  980.90   35.60 
  -2   7   1  958.10   36.20 
   2   7  -1  947.21   35.20 
  -2   7   1  960.70   31.10 
   2   7  -1 1010.30   30.90 
  -1  -7   1  923.51   32.30 
   1  -7  -1  981.80   33.10 
  -1  -7   1  967.40   32.60 
   1  -7  -1  921.71   32.70 
   1  -7  -1  925.11   29.10 
  -1  -7   1  841.32   32.20 
   1   7  -1  931.31   32.80 
  -1   7   1  906.21   32.70 
   1   7  -1  982.80   32.90 
   1   7  -1  937.11   29.40 
  -1   7   1  863.81   33.60 
  -1   7   1  917.41   32.40 
  -1   7   1  922.11   29.10 
   1   7  -1  882.01   32.30 
   0  -7  -1    5.90    7.80 
   0  -7  -1   14.90    6.30 
   0  -7  -1    5.50    6.60 
   0  -7  -1    3.50    7.10 
   0  -7   1    2.30    7.20 
   0   7   1   10.50    6.90 
   0   7  -1   13.50    6.60 
   0   7   1    5.40    7.00 
   0   7   1   14.90    8.10 
   0   7   1    8.80    6.60 
   0   7  -1    6.90    7.20 
   0   7  -1   22.90    7.60 
  -1  -7  -1    9.60    4.70 
  -1  -7  -1    5.70    8.30 
   1  -7   1   16.30    6.80 
  -1  -7  -1   15.70    7.00 
  -1  -7  -1   11.80    7.50 
  -1   7  -1   11.80    5.10 
  -1   7  -1    5.70    6.60 
  -1   7  -1    6.50    6.00 
  -1   7  -1   14.60    7.20 
   1   7   1   21.50    8.70 
   1   7   1   14.70    6.50 
   1   7   1    9.80    5.00 
   1   7   1    8.90    8.60 
   2  -7   1  576.04   24.80 
   2  -7   1  587.84   20.90 
  -2  -7  -1  575.74   27.10 
  -2  -7  -1  574.64   25.30 
   2  -7   1  611.34   24.10 
  -2  -7  -1  594.94   20.90 
  -2   7  -1  601.34   24.50 
  -2   7  -1  581.44   20.60 
   2   7   1  559.84   22.80 
  -2   7  -1  602.14   24.30 
   2   7   1  632.54   27.40 
   2   7   1  603.04   27.10 
   2   7   1  616.64   23.30 
   3  -7   1   16.00    5.10 
  -3  -7  -1   20.00   12.80 
  -3  -7  -1   19.40   10.00 
   3  -7   1   22.40    8.70 
   3   7   1   15.40   13.30 
   3   7   1   23.40   11.60 
  -3   7  -1   16.90    9.40 
  -3   7  -1   24.80    5.50 
   3   7   1   25.90    7.30 
   4  -7   1  160.08   17.70 
   4  -7   1  169.28   15.90 
   4  -7   1  155.98   10.90 
  -4  -7  -1  113.49   18.10 
  -4  -7  -1  166.68   19.30 
   4   7   1  189.98   22.50 
  -4   7  -1  182.08   20.40 
  -4   7  -1  144.79   11.40 
   4   7   1  136.29   19.30 
  -4   7  -1  160.98   19.60 
   4   7   1  160.48   14.60 
   5  -7   1 1067.09   35.00 
  -5  -7  -1 1079.49   49.10 
   5  -7   1 1049.00   45.80 
  -5  -7  -1 1060.29   38.00 
  -5  -7  -1 1075.09   47.60 
   5  -7   1 1054.49   41.50 
   5   7   1 1026.00   44.50 
  -5   7  -1 1040.50   45.30 
  -5   7  -1  995.50   35.00 
   5   7   1  951.70   48.90 
  -5   7  -1 1059.29   45.30 
   5   7   1 1033.30   38.90 
  -6  -7  -1  162.18   19.60 
   6  -7   1  162.08   18.50 
  -6  -7  -1  156.58   24.60 
   6  -7   1  137.39   12.90 
  -6  -7  -1  205.08   16.00 
   6  -7   1   94.69   21.00 
  -6  -7  -1  139.39   24.20 
  -6   7  -1  117.19   20.80 
   6   7   1  129.59   20.50 
  -6   7  -1  152.08   13.70 
   6   7   1  142.29   15.50 
  -6   7  -1  162.28   27.10 
   6   7   1  155.28   26.10 
   7  -7   1   10.30   13.20 
  -7  -7  -1  -18.30   22.00 
   7  -7   1  -10.50   19.30 
   7  -7   1    1.10    7.30 
  -7  -7  -1   14.50   10.20 
  -7  -7  -1   -7.80   16.40 
  -7  -7  -1  -45.90   21.30 
  -7   7  -1    1.70   20.60 
  -7   7  -1   19.90   21.80 
  -7   7  -1   -4.20    8.40 
   7   7   1    6.30   22.00 
   7   7   1    7.30   12.70 
  -7   7  -1   52.49   19.30 
   7   7   1    7.60   16.90 
  -8  -7  -1  128.49   23.90 
  -8  -7  -1  114.99   31.70 
  -8  -7  -1   92.39   13.70 
   8  -7   1  132.19   28.70 
   8  -7   1  117.89   17.80 
   8  -7   1  122.79   13.80 
  -8   7  -1  109.29   12.10 
  -8   7  -1  104.49   28.30 
   8   7   1  109.89   18.40 
   8   7   1   93.39   30.00 
  -8   7  -1   98.19   26.20 
   9  -7   1  189.68   34.00 
  -9  -7  -1  217.58   30.40 
  -9  -7  -1  218.88   35.00 
   9   7   1  218.68   22.80 
  -9   7  -1  192.08   35.50 
   9   7   1  116.69   34.00 
  -9   7  -1  186.98   33.30 
 -10  -7  -1   31.60   27.20 
  10  -7   1   81.29   22.40 
 -10  -7  -1   74.09   34.30 
  10   7   1   88.79   21.00 
 -10   7  -1   54.69   33.80 
  10   7   1   52.19   35.50 
 -10   7  -1   65.49   31.90 
 -11  -7  -1    2.50   29.50 
  11  -7   1   32.00   36.30 
 -11  -7  -1  -16.60   39.90 
 -11   7  -1   87.89   39.90 
 -11   7  -1   -6.40   34.20 
  11   7   1   28.40   21.80 
  11   7   1  -31.30   37.90 
  12  -8  -1  441.36   58.89 
 -12  -8   1  246.38   42.80 
 -12  -8   1  338.87   50.09 
  12   8  -1  434.16   62.69 
  12   8  -1  376.76   45.90 
 -12   8   1  283.47   52.79 
 -11  -8   1   90.69   33.80 
 -11  -8   1  100.19   31.00 
  11  -8  -1   99.39   22.60 
  11  -8  -1   98.89   37.60 
 -11   8   1  100.69   33.30 
  11   8  -1   67.19   37.70 
 -11   8   1  112.99   38.10 
  11   8  -1   55.89   25.20 
 -10  -8   1    5.40   23.50 
 -10  -8   1   -1.10   16.70 
 -10  -8   1  -10.30   29.40 
  10  -8  -1   15.50   17.70 
  10  -8  -1   19.80   47.20 
  10   8  -1  -11.50   31.60 
 -10   8   1  -42.00   17.00 
 -10   8   1    4.30   25.70 
 -10   8   1   43.90   33.00 
  10   8  -1   34.20   21.50 
  -9  -8   1  367.26   47.30 
   9  -8  -1  322.77   40.80 
  -9  -8   1  315.47   37.40 
   9  -8  -1  306.77   26.20 
  -9  -8   1  335.67   28.60 
   9  -8  -1  251.87   27.00 
  -9   8   1  308.97   27.10 
   9   8  -1  320.37   33.10 
  -9   8   1  295.87   32.20 
   9   8  -1  329.57   44.90 
  -9   8   1  316.77   39.00 
  -8  -8   1  233.98   29.50 
   8  -8  -1  236.58   30.90 
   8  -8  -1  231.98   25.80 
  -8  -8   1  258.57   25.70 
  -8  -8   1  191.28   28.80 
  -8   8   1  265.97   33.60 
  -8   8   1  204.18   22.90 
  -8   8   1  271.47   28.30 
   8   8  -1  281.57   26.70 
   8   8  -1  195.18   32.20 
   7  -8  -1  168.38   18.10 
  -7  -8   1   76.39   21.90 
  -7  -8   1  168.68   20.30 
   7  -8  -1  121.29   26.10 
  -7  -8   1  137.49   19.00 
  -7  -8   1  168.28   25.60 
   7  -8  -1  157.08   17.40 
   7   8  -1  162.28   19.70 
  -7   8   1  110.79   20.00 
  -7   8   1  146.69   27.30 
   7   8  -1  147.89   19.50 
  -7   8   1  129.09   21.40 
  -7   8   1  126.29   15.10 
   7   8  -1  159.08   26.90 
  -6  -8   1  -14.20    8.30 
   6  -8  -1   -3.80    9.50 
  -6  -8   1    4.40   16.10 
  -6  -8   1    1.70   11.70 
   6  -8  -1    2.80    7.90 
  -6  -8   1  -13.40   16.00 
   6  -8  -1   15.60   16.70 
   6   8  -1    1.10   12.40 
  -6   8   1   28.00   18.20 
  -6   8   1    3.40   13.30 
   6   8  -1   -2.60   18.20 
  -6   8   1   -9.70    9.00 
  -6   8   1   33.00   15.60 
  -5  -8   1  504.65   33.00 
  -5  -8   1  588.24   27.10 
  -5  -8   1  515.95   32.80 
   5  -8  -1  548.55   26.10 
  -5  -8   1  550.04   24.60 
   5  -8  -1  522.05   26.40 
   5  -8  -1  566.94   34.10 
   5   8  -1  541.95   28.50 
  -5   8   1  543.75   32.30 
  -5   8   1  494.05   35.60 
   5   8  -1  485.95   34.60 
  -5   8   1  549.54   25.00 
   5   8  -1  566.04   30.60 
  -4  -8   1 1052.49   43.30 
  -4  -8   1 1055.89   39.60 
   4  -8  -1 1055.09   44.70 
  -4  -8   1 1097.29   36.50 
   4  -8  -1  956.20   41.20 
  -4  -8   1 1153.98   45.30 
   4  -8  -1 1045.50   36.40 
   4   8  -1 1093.79   40.70 
   4   8  -1 1057.69   41.80 
  -4   8   1 1059.09   37.50 
  -4   8   1 1000.70   45.50 
  -4   8   1 1091.99   43.50 
  -4   8   1 1000.70   39.00 
   3  -8  -1   -6.70    9.90 
   3  -8  -1    3.80    6.90 
   3  -8  -1   10.10    8.20 
   3  -8  -1   10.40    4.80 
  -3  -8   1   10.90    5.10 
  -3  -8   1    3.90    9.40 
  -3  -8   1   -2.30    9.10 
   3   8  -1   10.50   11.40 
  -3   8   1    3.30    6.70 
  -3   8   1    4.70    5.40 
   3   8  -1   10.10    8.70 
  -3   8   1   -9.10    8.10 
   3   8  -1   13.30   11.40 
  -3   8   1   32.90   12.40 
   3   8  -1    4.40    4.60 
   2  -8  -1 1127.69   39.30 
  -2  -8   1 1136.89   40.70 
  -2  -8   1 1172.28   35.30 
   2  -8  -1 1209.48   41.50 
   2  -8  -1  991.70   40.50 
  -2  -8   1 1207.88   41.10 
  -2  -8   1 1151.68   39.40 
  -2   8   1 1145.69   41.60 
  -2   8   1 1162.68   36.10 
  -2   8   1 1201.28   39.40 
   2   8  -1 1199.08   35.40 
  -2   8   1 1163.58   36.20 
   2   8  -1 1130.59   40.10 
   2   8  -1 1138.89   40.40 
   2   8  -1 1140.79   41.60 
  -2   8   1 1255.17   42.00 
   1  -8  -1  138.89   12.00 
   1  -8  -1  135.89   14.10 
   1  -8  -1  137.29   12.80 
  -1  -8   1  127.09   11.30 
   1  -8  -1  126.39    8.60 
  -1  -8   1  146.59   12.90 
  -1  -8   1  112.89   13.20 
   1   8  -1  132.79   13.20 
  -1   8   1  139.69   13.00 
  -1   8   1  151.68   12.90 
   1   8  -1  137.39    9.30 
   1   8  -1  148.19   13.30 
   1   8  -1  125.29   13.60 
  -1   8   1  132.09    9.00 
  -1   8   1  159.38   14.00 
   0  -8  -1  205.18   14.70 
   0  -8  -1  204.48   13.10 
   0  -8  -1  206.58   14.80 
   0  -8   1  230.58   13.80 
   0  -8  -1  225.38   12.70 
   0   8  -1  254.47   14.10 
   0   8   1  220.58   13.80 
   0   8   1  225.68   16.20 
   0   8   1  250.67   14.80 
   0   8   1  244.28   13.10 
   0   8  -1  218.38   14.20 
   0   8  -1  226.28   14.10 
   1  -8   1   69.99    8.20 
  -1  -8  -1   58.09    9.90 
  -1  -8  -1   99.89   11.50 
  -1  -8  -1   95.39   11.20 
  -1  -8  -1   81.19    7.80 
  -1   8  -1   73.79    8.80 
   1   8   1   64.29    7.60 
   1   8   1   71.79    8.40 
   1   8   1   78.29   10.80 
   1   8   1   78.69   10.30 
  -1   8  -1   94.89    9.10 
  -1   8  -1   85.09   10.60 
   2  -8   1  911.81   31.10 
   2  -8   1  964.70   33.80 
  -2  -8  -1 1006.70   30.50 
   2  -8   1  963.00   34.50 
  -2  -8  -1  976.20   36.90 
  -2   8  -1  980.80   31.20 
  -2   8  -1  944.11   34.20 
   2   8   1  906.51   36.50 
  -2   8  -1  865.91   33.80 
   2   8   1  877.51   32.80 
   2   8   1  957.80   33.20 
  -3  -8  -1  281.37   20.90 
   3  -8   1  228.78   12.80 
  -3  -8  -1  228.08   23.40 
  -3   8  -1  216.28   21.70 
   3   8   1  277.47   20.90 
  -3   8  -1  254.07   21.40 
  -3   8  -1  284.17   13.50 
   3   8   1  244.08   15.70 
   3   8   1  302.87   25.80 
   4  -8   1  719.33   31.00 
   4  -8   1  729.03   34.10 
  -4  -8  -1  679.63   36.30 
   4  -8   1  705.43   25.60 
  -4  -8  -1  746.03   36.10 
  -4   8  -1  723.23   26.10 
  -4   8  -1  739.13   33.80 
  -4   8  -1  737.03   34.00 
   4   8   1  687.03   32.60 
   4   8   1  740.03   39.80 
   4   8   1  720.13   35.30 
   5  -8   1   -8.30    8.10 
  -5  -8  -1   16.90   16.50 
   5  -8   1   15.90   14.60 
   5  -8   1   18.10    6.70 
  -5  -8  -1   24.00   14.60 
  -5   8  -1    8.30    6.60 
  -5   8  -1    2.50   13.20 
   5   8   1   11.10   16.90 
   5   8   1   19.20   10.50 
   5   8   1   31.10   13.70 
  -5   8  -1   32.60   13.80 
  -6  -8  -1  599.94   27.30 
   6  -8   1  625.84   30.60 
  -6  -8  -1  611.44   33.20 
   6  -8   1  571.14   38.40 
  -6  -8  -1  637.34   39.70 
  -6  -8  -1  639.24   42.60 
   6  -8   1  586.84   23.90 
   6   8   1  594.24   43.00 
   6   8   1  599.34   29.80 
  -6   8  -1  584.64   24.40 
  -6   8  -1  561.94   41.10 
   6   8   1  527.75   36.00 
  -6   8  -1  610.04   41.30 
  -6   8  -1  613.84   38.60 
  -7  -8  -1  270.67   33.80 
   7  -8   1  246.28   16.40 
  -7  -8  -1  243.88   20.30 
   7  -8   1  228.38   22.60 
  -7  -8  -1  348.47   46.40 
   7  -8   1  196.78   27.10 
  -7  -8  -1  243.98   28.60 
   7   8   1  245.78   24.10 
  -7   8  -1  248.78   17.40 
  -7   8  -1  268.97   32.50 
  -7   8  -1  271.27   32.90 
  -7   8  -1  280.47   30.40 
   7   8   1  232.78   33.70 
   8  -8   1   74.49   16.20 
  -8  -8  -1   86.89   22.00 
  -8  -8  -1   93.49   28.70 
   8  -8   1  114.49   12.50 
   8  -8   1   99.99   27.40 
   8   8   1   99.29   18.00 
   8   8   1   47.30   27.70 
  -8   8  -1   82.29   27.60 
  -8   8  -1   92.99   12.20 
  -8   8  -1   93.29   28.60 
  -9  -8  -1   37.50   29.80 
  -9  -8  -1    0.00   23.10 
   9  -8   1   42.30   28.00 
  -9   8  -1   28.40   29.00 
  -9   8  -1  -11.00   27.20 
   9   8   1   24.70   16.50 
   9   8   1  -36.60   27.10 
  10  -8   1   59.09   38.20 
 -10  -8  -1   57.89   28.50 
 -10  -8  -1   72.89   36.70 
  10   8   1   56.29   35.00 
 -10   8  -1   30.30   31.60 
 -10   8  -1   43.00   34.30 
  10   8   1   45.50   19.00 
  11  -8   1  215.08   46.00 
 -11  -8  -1  138.59   34.70 
 -11  -8  -1  193.28   45.00 
  11   8   1  268.17   47.40 
 -11   8  -1  218.48   45.00 
 -11   8  -1  170.38   42.60 
  11   8   1  182.08   26.00 
  11  -9  -1  323.87   35.80 
 -11  -9   1  344.77   38.40 
  11  -9  -1  369.46   50.49 
 -11  -9   1  319.97   42.80 
  11   9  -1  350.66   50.49 
 -11   9   1  345.97   48.00 
  11   9  -1  412.66   42.70 
 -11   9   1  326.67   40.00 
 -10  -9   1  934.71   52.39 
 -10  -9   1  943.51   55.69 
 -10  -9   1 1023.90   64.89 
  10  -9  -1  997.40   47.40 
  10   9  -1  984.20   53.49 
  10   9  -1  968.00   68.29 
 -10   9   1 1008.40   59.69 
 -10   9   1  975.90   45.70 
 -10   9   1  964.70   68.19 
  -9  -9   1  365.06   42.30 
  -9  -9   1  367.76   30.60 
   9  -9  -1  477.75   48.90 
  -9  -9   1  337.07   37.80 
   9  -9  -1  421.26   31.80 
   9  -9  -1  513.65   31.60 
  -9   9   1  386.96   40.60 
   9   9  -1  355.46   35.40 
  -9   9   1  404.86   30.20 
   9   9  -1  393.76   50.69 
  -9   9   1  382.76   43.30 
   8  -9  -1  441.16   30.50 
   8  -9  -1  500.85   44.50 
  -8  -9   1  491.65   31.00 
  -8  -9   1  517.75   44.30 
  -8  -9   1  495.35   34.50 
  -8   9   1  447.26   44.20 
  -8   9   1  496.15   29.50 
   8   9  -1  415.26   48.90 
  -8   9   1  470.85   38.30 
   8   9  -1  456.45   35.10 
  -7  -9   1 2634.84   86.79 
   7  -9  -1 2646.14   96.99 
  -7  -9   1 2609.44   87.19 
   7  -9  -1 2555.94   85.09 
  -7  -9   1 2617.24   96.49 
  -7  -9   1 2722.23   95.19 
   7  -9  -1 2773.52   86.29 
   7   9  -1 2600.04   88.19 
  -7   9   1 2513.25   94.49 
  -7   9   1 2269.47   96.19 
  -7   9   1 2637.04   84.89 
   7   9  -1 2601.74   92.39 
  -7   9   1 2516.55   88.39 
   7   9  -1 2525.15   97.69 
   6  -9  -1  927.01   46.90 
  -6  -9   1  995.80   39.70 
  -6  -9   1  921.71   47.20 
  -6  -9   1  975.10   40.00 
  -6  -9   1 1005.30   48.30 
   6  -9  -1  992.20   39.20 
   6  -9  -1 1040.60   38.10 
   6   9  -1 1066.59   46.60 
   6   9  -1  984.30   50.69 
   6   9  -1  959.50   42.30 
  -6   9   1  966.40   49.20 
  -6   9   1 1008.80   39.20 
  -6   9   1  979.90   42.60 
  -6   9   1 1002.80   46.50 
   5  -9  -1   33.50   10.90 
  -5  -9   1   58.49   15.80 
   5  -9  -1   32.40   16.50 
  -5  -9   1   61.19    9.50 
   5  -9  -1   36.00    9.30 
  -5  -9   1   51.79   11.50 
  -5  -9   1   61.19   16.30 
  -5   9   1   45.10   14.40 
  -5   9   1   47.30   13.20 
   5   9  -1   41.40   12.90 
   5   9  -1   50.59   19.00 
   5   9  -1   14.20   12.20 
  -5   9   1   18.30   10.00 
  -5   9   1   36.10   17.50 
  -4  -9   1  496.05   20.60 
   4  -9  -1  455.95   29.30 
  -4  -9   1  460.95   28.90 
  -4  -9   1  519.15   28.80 
   4  -9  -1  480.25   20.50 
   4  -9  -1  444.36   24.50 
  -4  -9   1  500.75   24.80 
   4   9  -1  504.95   33.80 
  -4   9   1  516.95   30.90 
  -4   9   1  470.95   21.90 
   4   9  -1  507.15   26.60 
   4   9  -1  480.25   26.60 
  -4   9   1  488.85   28.00 
  -4   9   1  410.06   25.10 
  -3  -9   1 4226.18  135.49 
   3  -9  -1 4362.26  137.09 
  -3  -9   1 4729.73  137.29 
   3  -9  -1 4413.06  133.19 
  -3  -9   1 4555.54  134.39 
  -3  -9   1 4438.66  129.49 
  -3   9   1 4480.65  137.89 
  -3   9   1 4668.93  133.49 
   3   9  -1 4248.27  129.49 
  -3   9   1 4390.06  130.99 
   3   9  -1 4337.97  134.39 
  -3   9   1 4592.84  136.69 
   3   9  -1 4236.88  136.89 
   3   9  -1 4484.05  135.79 
  -2  -9   1 3693.13  110.09 
   2  -9  -1 3773.72  112.19 
   2  -9  -1 3589.34  109.39 
   2  -9  -1 3768.02  111.59 
  -2  -9   1 3622.74  105.09 
  -2  -9   1 3622.84  110.99 
  -2  -9   1 3670.63  110.89 
  -2   9   1 3928.11  112.29 
  -2   9   1 3665.93  111.49 
   2   9  -1 3555.24  110.49 
   2   9  -1 3499.35  110.99 
   2   9  -1 3418.86  109.69 
  -2   9   1 3489.65  106.29 
  -2   9   1 3686.03  109.59 
  -2   9   1 3383.46  106.29 
   2   9  -1 3590.54  104.99 
  -1  -9   1  160.08   13.50 
   1  -9  -1  141.79   13.30 
   1  -9  -1  154.38    9.30 
   1  -9  -1  140.99   13.40 
  -1  -9   1  157.68   13.20 
  -1  -9   1  152.78   12.40 
   1  -9  -1  157.58   13.10 
   1   9  -1  156.78   13.80 
  -1   9   1  164.38   12.10 
  -1   9   1  138.99    9.30 
   1   9  -1  167.88    9.40 
   1   9  -1  165.48   13.70 
  -1   9   1  152.48   13.00 
   1   9  -1  171.68   14.20 
  -1   9   1  139.79   13.00 
   0  -9  -1 2881.01   87.29 
   0  -9  -1 2966.30   85.29 
   0  -9  -1 2678.33   85.59 
   0  -9   1 2657.63   86.89 
   0   9   1 3036.80   85.29 
   0   9  -1 2809.62   86.69 
   0   9   1 2807.82   85.99 
   0   9  -1 2874.91   86.69 
   0   9   1 2858.41   88.49 
   0   9  -1 2868.61   86.59 
   0   9   1 2878.91   87.09 
  -1  -9  -1 6897.01  195.88 
  -1  -9  -1 6600.84  198.88 
  -1  -9  -1 6795.42  200.58 
  -1  -9  -1 6648.43  199.78 
   1  -9   1 6780.32  199.08 
  -1   9  -1 6816.72  197.78 
   1   9   1 6774.22  201.08 
  -1   9  -1 6495.45  198.88 
   1   9   1 6775.62  199.78 
   1   9   1 6817.72  195.78 
   1   9   1 6928.91  199.38 
  -1   9  -1 7018.50  199.28 
  -2  -9  -1 3445.56  103.09 
   2  -9   1 3494.05  101.19 
  -2  -9  -1 2941.01  105.29 
  -2  -9  -1 3341.17   96.39 
   2  -9   1 3294.37   98.29 
   2   9   1 3245.08  102.89 
   2   9   1 3214.48   99.69 
  -2   9  -1 3460.65  100.99 
   2   9   1 3030.00  105.09 
  -2   9  -1 3418.16   98.09 
   2   9   1 3294.17   99.99 
  -2   9  -1 3170.18  100.29 
  -3  -9  -1   19.60    6.50 
   3  -9   1   20.20    7.40 
  -3  -9  -1   13.60   10.30 
   3  -9   1   30.10   11.40 
  -3  -9  -1   15.90   12.30 
   3  -9   1   26.00    6.60 
   3   9   1   31.30   13.10 
   3   9   1   18.60    9.60 
   3   9   1   43.60   15.20 
  -3   9  -1   11.50   10.50 
  -3   9  -1   20.40    9.90 
  -3   9  -1   36.10    6.80 
  -4  -9  -1 1787.22   63.49 
  -4  -9  -1 1630.84   63.19 
   4  -9   1 1716.73   53.89 
   4  -9   1 1711.93   58.49 
   4  -9   1 1741.13   62.09 
   4   9   1 1691.03   57.09 
  -4   9  -1 1704.73   53.89 
  -4   9  -1 1712.13   60.39 
   4   9   1 1739.93   63.29 
  -4   9  -1 1685.43   60.89 
   4   9   1 1673.73   64.99 
   5  -9   1 2946.91   90.49 
  -5  -9  -1 3025.30  102.59 
   5  -9   1 2795.12   99.59 
   5  -9   1 3072.89   96.89 
  -5  -9  -1 3167.78  102.89 
  -5   9  -1 3121.99   99.99 
   5   9   1 2984.40   94.29 
  -5   9  -1 2914.81   98.59 
  -5   9  -1 2989.80   90.69 
   5   9   1 2856.21  102.59 
  -6  -9  -1 1327.47   50.59 
   6  -9   1 1293.17   50.19 
  -6  -9  -1 1182.58   55.79 
   6  -9   1 1282.87   42.70 
  -6  -9  -1 1286.17   57.59 
   6  -9   1 1259.27   56.29 
   6   9   1 1320.17   48.40 
  -6   9  -1 1333.37   55.69 
  -6   9  -1 1240.08   54.49 
   6   9   1 1149.19   58.09 
  -6   9  -1 1292.97   43.20 
  -6   9  -1 1276.67   57.99 
   6   9   1 1282.07   55.59 
  -7  -9  -1  -16.10   21.50 
  -7  -9  -1   17.90   16.20 
   7  -9   1   24.40   13.00 
   7  -9   1   18.70    8.30 
   7  -9   1   21.00   20.40 
  -7   9  -1   23.90    9.70 
  -7   9  -1   27.70   23.60 
  -7   9  -1   29.10   18.50 
   7   9   1   -0.20   13.70 
  -7   9  -1   27.70   20.80 
   7   9   1    7.20   22.70 
  -8  -9  -1 1619.84   75.29 
   8  -9   1 1583.24   62.89 
  -8  -9  -1 1584.94   64.29 
   8  -9   1 1438.66   71.89 
   8   9   1 1600.24   75.69 
   8   9   1 1616.54   59.79 
  -8   9  -1 1365.76   55.09 
  -8   9  -1 1560.14   74.59 
  -8   9  -1 1664.53   72.09 
  -9  -9  -1 1180.28   59.09 
  -9  -9  -1 1249.07   70.49 
   9  -9   1 1211.68   69.39 
  -9   9  -1 1163.28   70.19 
   9   9   1 1176.28   51.69 
  -9   9  -1 1304.87   66.59 
   9   9   1 1200.88   70.99 
 -10  -9  -1  261.57   41.70 
  10  -9   1  347.67   45.50 
 -10  -9  -1  329.97   41.90 
 -10   9  -1  322.07   41.50 
  10   9   1  295.17   43.60 
  10   9   1  282.07   33.80 
 -10   9  -1  358.66   46.10 
 -11  -9  -1  102.39   32.20 
 -11  -9  -1  188.68   44.60 
  11  -9   1  222.28   43.40 
 -11   9  -1  103.29   42.60 
  11   9   1   84.29   24.60 
  11   9   1  144.89   46.50 
 -11   9  -1  208.28   42.60 
  11 -10  -1  109.39   23.40 
 -11 -10   1   81.09   29.50 
 -11 -10   1   80.09   36.60 
  11 -10  -1  230.18   47.00 
 -11  10   1  163.98   42.60 
  11  10  -1   33.30   39.50 
 -11  10   1  142.79   33.80 
  11  10  -1   90.59   26.40 
  10 -10  -1  100.09   20.30 
 -10 -10   1  110.69   33.60 
 -10 -10   1   81.69   25.40 
  10 -10  -1   66.49   39.70 
 -10  10   1   64.39   26.60 
  10  10  -1   90.29   38.20 
 -10  10   1   25.40   18.80 
  10  10  -1   77.59   23.50 
   9 -10  -1  430.46   31.80 
   9 -10  -1  368.46   28.10 
  -9 -10   1  405.76   45.30 
  -9 -10   1  347.37   36.20 
  -9 -10   1  341.47   31.00 
   9 -10  -1  534.15   50.09 
   9  10  -1  391.16   52.49 
   9  10  -1  314.47   35.30 
  -9  10   1  360.36   43.60 
  -9  10   1  393.86   40.10 
  -9  10   1  345.77   28.80 
   8 -10  -1 1165.18   60.79 
  -8 -10   1  930.31   44.40 
  -8 -10   1  977.60   56.39 
   8 -10  -1 1056.79   44.30 
   8 -10  -1  966.10   47.10 
  -8 -10   1  965.40   46.70 
  -8  10   1  941.61   58.39 
   8  10  -1 1043.40   62.89 
   8  10  -1  954.60   47.60 
  -8  10   1 1029.50   50.39 
  -8  10   1 1000.60   42.70 
   7 -10  -1  536.45   29.20 
  -7 -10   1  475.15   39.50 
  -7 -10   1  504.85   34.70 
  -7 -10   1  485.95   30.30 
  -7 -10   1  489.15   40.60 
   7 -10  -1  541.65   26.60 
   7 -10  -1  513.55   40.10 
  -7  10   1  507.45   37.70 
   7  10  -1  462.45   44.10 
   7  10  -1  484.75   33.00 
  -7  10   1  482.25   27.90 
  -7  10   1  518.35   35.40 
   7  10  -1  406.46   34.20 
  -7  10   1  431.36   43.20 
  -6 -10   1  130.29   21.90 
   6 -10  -1  112.39   14.90 
  -6 -10   1  116.59   14.00 
   6 -10  -1  133.39   14.50 
   6 -10  -1  105.79   21.90 
  -6 -10   1  110.09   20.60 
   6  10  -1   93.59   16.40 
   6  10  -1  107.79   19.20 
  -6  10   1   83.59   18.70 
  -6  10   1  151.28   17.70 
  -6  10   1  117.49   16.90 
  -6  10   1  104.79   22.10 
   6  10  -1   77.19   20.80 
  -5 -10   1 2125.59   74.99 
   5 -10  -1 2063.19   74.69 
  -5 -10   1 2044.90   73.89 
   5 -10  -1 1843.82   68.69 
  -5 -10   1 2105.69   68.99 
   5 -10  -1 2039.40   67.79 
  -5 -10   1 2117.09   65.69 
  -5  10   1 1811.62   74.79 
   5  10  -1 2083.89   70.09 
   5  10  -1 2072.69   72.39 
   5  10  -1 1921.61   75.69 
  -5  10   1 2107.69   67.29 
  -5  10   1 2231.88   74.79 
  -4 -10   1 1807.12   56.29 
  -4 -10   1 1706.63   64.09 
   4 -10  -1 1728.53   65.29 
  -4 -10   1 2012.10   66.29 
  -4 -10   1 1905.01   61.69 
   4 -10  -1 1785.62   60.39 
   4 -10  -1 1848.52   57.79 
  -4  10   1 1779.82   59.99 
   4  10  -1 1796.92   66.49 
   4  10  -1 1803.72   63.79 
  -4  10   1 1714.43   64.49 
  -4  10   1 1791.62   58.29 
   4  10  -1 1775.12   62.09 
  -4  10   1 1850.21   67.39 
  -3 -10   1  392.06   23.40 
  -3 -10   1  393.86   14.40 
   3 -10  -1  397.16   24.80 
  -3 -10   1  364.36   23.70 
  -3 -10   1  383.46   20.80 
   3  10  -1  402.36   23.10 
   3  10  -1  378.56   14.50 
  -3  10   1  394.16   17.00 
  -3  10   1  408.06   26.70 
   3  10  -1  371.46   22.30 
   3  10  -1  388.76   25.50 
  -3  10   1  335.57   22.60 
  -3  10   1  332.67   22.10 
   2 -10  -1 1158.58   40.80 
   2 -10  -1 1097.19   45.60 
   2 -10  -1 1098.09   38.70 
  -2 -10   1  914.81   42.40 
  -2 -10   1 1116.49   40.10 
  -2 -10   1 1081.39   41.00 
   2  10  -1 1059.99   42.70 
  -2  10   1 1173.08   35.50 
  -2  10   1 1176.88   41.20 
   2  10  -1 1150.68   33.40 
   2  10  -1 1078.89   40.40 
  -2  10   1 1158.68   38.80 
   2  10  -1 1062.79   40.10 
   1 -10  -1 1453.15   46.60 
  -1 -10   1 1516.55   49.70 
   1 -10  -1 1411.36   49.30 
   1 -10  -1 1542.65   49.40 
  -1 -10   1 1468.15   49.99 
   1  10  -1 1553.54   50.19 
   1  10  -1 1490.45   49.80 
  -1  10   1 1472.45   49.10 
  -1  10   1 1467.65   50.59 
   1  10  -1 1594.54   46.10 
  -1  10   1 1543.05   49.50 
   1  10  -1 1530.55   49.90 
  -1  10   1 1441.56   46.60 
   0 -10   1 2471.25   77.79 
   0 -10  -1 2652.73   75.89 
   0 -10  -1 2410.66   77.49 
   0 -10  -1 2355.96   76.19 
   0  10  -1 2488.25   76.89 
   0  10   1 2556.34   76.79 
   0  10  -1 2455.35   77.29 
   0  10   1 2475.65   79.19 
   0  10   1 2532.05   75.69 
   0  10   1 2600.24   77.99 
   0  10  -1 2460.35   77.49 
   0  10  -1 2586.84   77.89 
   1 -10   1   83.29    9.80 
  -1 -10  -1   68.99   10.40 
  -1 -10  -1   88.99    7.50 
  -1 -10  -1   62.59    9.60 
  -1 -10  -1  116.59   12.20 
   1  10   1   76.79    7.60 
   1  10   1   70.49   10.20 
   1  10   1   82.89    9.40 
  -1  10  -1   81.09    9.10 
  -1  10  -1   75.29    9.10 
  -1  10  -1  114.19   10.10 
   1  10   1   92.59   12.40 
  -2 -10  -1  256.57   18.70 
  -2 -10  -1  236.18   20.80 
   2 -10   1  263.27   14.60 
   2 -10   1  270.87   17.70 
  -2 -10  -1  276.77   11.60 
  -2  10  -1  261.07   16.70 
  -2  10  -1  286.77   16.20 
  -2  10  -1  240.08   16.40 
   2  10   1  236.78   18.10 
   2  10   1  280.77   20.00 
  -2  10  -1  285.07   14.00 
   2  10   1  290.87   21.90 
  -3 -10  -1 3398.96  112.19 
   3 -10   1 3506.15  108.99 
  -3 -10  -1 3732.53  112.79 
   3 -10   1 3467.45  110.59 
   3 -10   1 3503.65  105.79 
  -3 -10  -1 3552.04  104.49 
   3  10   1 3592.74  108.69 
   3  10   1 3533.25  112.09 
  -3  10  -1 3372.56  109.19 
   3  10   1 3397.86  107.99 
  -3  10  -1 3537.55  105.69 
   3  10   1 3604.54  113.79 
  -3  10  -1 3635.84  110.69 
   4 -10   1 2483.55   82.99 
   4 -10   1 2425.06   75.39 
   4 -10   1 2480.05   79.69 
  -4 -10  -1 2339.67   84.49 
  -4 -10  -1 2612.04   84.89 
  -4  10  -1 2389.66   81.89 
   4  10   1 2474.45   84.09 
  -4  10  -1 2477.35   75.49 
   4  10   1 2377.86   86.39 
   4  10   1 2408.66   78.19 
  -4  10  -1 2464.45   81.09 
  -5 -10  -1  -15.50   25.60 
  -5 -10  -1   -5.10   15.80 
   5 -10   1    3.10    6.40 
   5 -10   1    1.90    8.20 
   5 -10   1    0.20   14.30 
   5  10   1  -11.20   11.20 
  -5  10  -1   -0.10    7.60 
   5  10   1    4.80   18.80 
   5  10   1   -0.90   10.40 
  -5  10  -1   20.40   13.90 
  -5  10  -1   10.70   13.10 
  -6 -10  -1  966.50   49.80 
  -6 -10  -1  978.60   50.89 
   6 -10   1  852.91   47.40 
  -6 -10  -1  973.40   40.80 
   6 -10   1  915.21   33.50 
   6 -10   1  988.20   40.70 
  -6  10  -1  913.71   44.80 
  -6  10  -1  944.51   51.89 
  -6  10  -1  936.51   46.00 
   6  10   1  837.32   51.79 
  -6  10  -1  954.30   34.40 
   6  10   1  956.40   39.70 
   6  10   1  935.31   46.70 
  -7 -10  -1  894.61   51.39 
  -7 -10  -1  877.41   41.90 
   7 -10   1  855.11   50.79 
   7 -10   1  874.01   33.20 
   7 -10   1  895.61   42.00 
  -7  10  -1  869.91   33.60 
  -7  10  -1  956.40   50.89 
   7  10   1  887.31   40.30 
  -7  10  -1  934.21   54.69 
   7  10   1  826.82   54.79 
  -7  10  -1  840.62   48.50 
  -8 -10  -1  509.15   38.10 
  -8 -10  -1  539.15   49.50 
   8 -10   1  631.94   48.80 
   8 -10   1  544.25   34.90 
  -8  10  -1  530.25   48.50 
  -8  10  -1  503.45   48.20 
   8  10   1  511.65   49.99 
   8  10   1  543.65   34.60 
   9 -10   1   52.99   13.40 
  -9 -10  -1   13.50   22.70 
   9 -10   1   48.20   29.60 
  -9 -10  -1   49.40   28.40 
  -9  10  -1   14.10   31.40 
   9  10   1   28.70   18.00 
   9  10   1    7.90   29.70 
  -9  10  -1   -3.60   13.60 
  -9  10  -1   40.70   28.00 
 -10 -10  -1  255.37   32.80 
  10 -10   1  238.28   41.30 
 -10 -10  -1  283.17   43.90 
 -10  10  -1  236.48   38.60 
  10  10   1  227.78   26.10 
 -10  10  -1  255.97   44.80 
  10  10   1  308.37   47.40 
 -11 -10  -1  402.16   51.69 
 -11 -10  -1  384.76   41.90 
  11  10   1  445.16   42.20 
 -11  10  -1  476.95   55.89 
 -11  10  -1  436.06   49.80 
  11  10   1  390.36   53.39 
  11 -11  -1   59.19   41.30 
 -11 -11   1  -22.30   26.60 
  11 -11  -1  -22.10   19.70 
 -11 -11   1    8.30   34.20 
 -11  11   1    7.10   30.80 
  11  11  -1  -10.20   36.80 
 -11  11   1   37.70   39.30 
  11  11  -1   17.40   25.40 
 -10 -11   1   -6.10   22.90 
 -10 -11   1   49.00   37.90 
  10 -11  -1   47.20   19.00 
  10 -11  -1   32.80   35.60 
 -10  11   1   37.50   18.80 
 -10  11   1    5.40   25.70 
  10  11  -1   13.20   21.40 
 -10  11   1   13.50   32.00 
  10  11  -1   19.00   31.80 
  -9 -11   1   45.70   28.00 
   9 -11  -1   39.50   16.50 
   9 -11  -1   43.50   28.30 
   9 -11  -1   37.60   14.10 
  -9 -11   1   60.29   15.90 
  -9 -11   1    8.00   19.00 
   9  11  -1   25.90   19.50 
  -9  11   1  -31.70   14.10 
  -9  11   1    5.00   21.70 
  -9  11   1  -36.70   28.00 
   9  11  -1  -31.50   29.30 
   8 -11  -1   18.10   11.50 
   8 -11  -1   -1.40   25.00 
  -8 -11   1  -10.60   14.10 
  -8 -11   1   -0.10   22.20 
   8 -11  -1   14.10   14.70 
  -8 -11   1    9.30   17.60 
  -8  11   1    7.00   27.20 
  -8  11   1    9.40   12.90 
   8  11  -1   17.50   16.80 
  -8  11   1   11.30   19.30 
   8  11  -1   16.30   26.80 
   7 -11  -1   79.79   24.70 
  -7 -11   1   60.39   14.90 
  -7 -11   1   37.80   23.20 
   7 -11  -1   50.29   13.90 
  -7 -11   1   54.09   13.90 
  -7 -11   1   55.09   23.60 
   7 -11  -1   29.60   11.20 
   7  11  -1   92.09   19.70 
  -7  11   1   66.79   18.40 
   7  11  -1   51.39   24.30 
  -7  11   1   58.59   19.50 
  -7  11   1   50.59   13.00 
   7  11  -1   45.20   18.30 
  -7  11   1   42.10   26.10 
  -6 -11   1   74.99   21.40 
  -6 -11   1   44.90   17.70 
   6 -11  -1   73.89   10.90 
  -6 -11   1   55.09   11.80 
  -6 -11   1   52.19   11.80 
   6 -11  -1   60.99   20.60 
   6 -11  -1   74.89   13.60 
   6  11  -1   68.69   16.90 
  -6  11   1   86.29   15.40 
   6  11  -1   66.59   17.20 
  -6  11   1   66.19   12.70 
  -6  11   1   58.89   22.40 
  -6  11   1  110.09   21.20 
   6  11  -1   41.90   22.00 
  -5 -11   1   -9.50   14.30 
   5 -11  -1   -2.80    9.20 
  -5 -11   1   -4.80    9.10 
  -5 -11   1   -9.90   11.90 
   5 -11  -1    3.30   14.70 
  -5 -11   1   -4.20    7.40 
   5  11  -1  -11.70   12.30 
   5  11  -1  -13.50   10.80 
  -5  11   1   -0.20   17.60 
   5  11  -1    1.60   18.50 
  -5  11   1   -1.80    9.40 
  -5  11   1   -7.60   12.70 
  -4 -11   1   47.00   14.30 
   4 -11  -1   47.60    7.20 
  -4 -11   1   34.90   13.80 
  -4 -11   1   42.50    6.80 
   4 -11  -1   21.90   13.00 
  -4 -11   1   38.00   10.30 
   4 -11  -1   28.30   10.60 
  -4  11   1    4.90    8.90 
   4  11  -1   32.00   12.40 
  -4  11   1   23.60    7.70 
   4  11  -1   27.10   12.30 
  -4  11   1   31.00   12.50 
  -4  11   1   43.80   16.80 
   4  11  -1   37.50   17.60 
  -3 -11   1  167.08   18.60 
  -3 -11   1  171.88   16.10 
  -3 -11   1  157.38   20.10 
   3 -11  -1  162.88   20.50 
   3 -11  -1  152.08   16.70 
  -3 -11   1  160.08    8.40 
   3  11  -1  204.18   24.20 
  -3  11   1  157.28   12.00 
  -3  11   1  168.08   17.30 
  -3  11   1  157.68   15.20 
  -3  11   1  153.68   11.20 
   3  11  -1  128.29   14.70 
  -3  11   1  170.88   20.60 
   3  11  -1  174.38   18.50 
  -2 -11   1   36.50    8.40 
   2 -11  -1   32.40    9.20 
  -2 -11   1   32.40   10.90 
   2 -11  -1   38.20   11.60 
   2  11  -1   27.50    8.80 
  -2  11   1   27.90   12.70 
   2  11  -1   33.80    3.90 
   2  11  -1   25.10   10.20 
   2  11  -1   33.60   15.10 
  -2  11   1   37.40    6.20 
  -2  11   1   58.19   10.50 
   1 -11  -1   27.50    5.70 
   1 -11  -1   21.10    8.30 
   1 -11  -1   23.30    7.50 
  -1 -11   1   35.80    8.90 
  -1 -11   1   35.30    8.20 
  -1  11   1   29.20    7.30 
  -1  11   1   28.20    8.70 
   1  11  -1   39.80    8.70 
   1  11  -1   25.80    8.30 
  -1  11   1   31.90    8.10 
   1  11  -1   35.80    5.50 
  -1  11   1   32.30    6.10 
   0 -11  -1  180.48   17.00 
   0 -11  -1  190.88   13.10 
   0 -11  -1  223.88   12.40 
   0 -11   1  217.18   14.80 
   0  11   1  201.98   14.50 
   0  11  -1  214.98   14.00 
   0  11   1  200.18   12.80 
   0  11   1  190.88   18.70 
   0  11  -1  219.38   15.10 
   0  11  -1  215.68   14.20 
   0  11  -1  230.38   14.60 
   0  11   1  193.88   13.70 
   1 -11   1   18.10    6.90 
  -1 -11  -1   22.30    8.20 
  -1 -11  -1   17.10    4.50 
   1 -11   1   22.90    7.60 
  -1 -11  -1   17.30    8.10 
  -1  11  -1   12.80    7.20 
   1  11   1   26.00    9.70 
  -1  11  -1   15.50    6.60 
   1  11   1   20.60    4.80 
  -1  11  -1   23.20    6.60 
   1  11   1   11.80    8.10 
  -2 -11  -1   91.29   13.80 
   2 -11   1  117.09   13.60 
  -2 -11  -1  128.49    8.10 
   2 -11   1  128.69   12.50 
  -2 -11  -1  114.79   15.40 
  -2  11  -1  136.69   11.60 
  -2  11  -1  113.59   13.90 
   2  11   1  114.39   13.30 
  -2  11  -1   90.69   12.70 
   2  11   1  109.89   13.40 
   2  11   1  108.49   12.10 
   2  11   1  134.39   18.10 
  -2  11  -1  114.49   12.70 
  -3 -11  -1   39.70   12.20 
  -3 -11  -1   40.70   14.90 
  -3 -11  -1   28.00    6.20 
   3 -11   1   35.40    7.70 
   3 -11   1   34.20   12.50 
  -3  11  -1   36.20   10.90 
   3  11   1   41.50   13.50 
   3  11   1   24.60    9.70 
  -3  11  -1   34.50   10.50 
   3  11   1   40.00    9.90 
  -3  11  -1   44.10    7.70 
   3  11   1   40.10   15.10 
   4 -11   1  125.89   12.10 
  -4 -11  -1  159.98   19.00 
   4 -11   1  126.69   17.20 
  -4 -11  -1  108.39   18.80 
   4 -11   1  120.59   14.60 
  -4 -11  -1  127.49   12.30 
  -4  11  -1  136.29   12.60 
  -4  11  -1  122.59   15.30 
   4  11   1  108.09   18.80 
   4  11   1  144.89   14.30 
   4  11   1  136.89   16.90 
  -4  11  -1  149.49   17.60 
   4  11   1  142.69   15.10 
  -5 -11  -1    0.80   13.50 
  -5 -11  -1    6.50    9.20 
   5 -11   1   12.80   15.80 
  -5 -11  -1   -4.60   16.00 
   5 -11   1  -10.50    7.80 
   5 -11   1   -7.50    6.80 
   5  11   1  -13.40   11.20 
  -5  11  -1   10.50   13.20 
   5  11   1   25.90   11.50 
   5  11   1   -2.00   19.50 
  -5  11  -1   10.70   12.50 
  -5  11  -1    3.90    7.40 
  -6 -11  -1   13.40   13.00 
   6 -11   1   -0.70    7.20 
  -6 -11  -1   -1.20   19.40 
   6 -11   1    0.70   18.30 
  -6 -11  -1   -3.50   17.80 
   6 -11   1   10.90   10.40 
  -6  11  -1    6.20   16.80 
  -6  11  -1    9.40    8.60 
  -6  11  -1   13.20   13.90 
  -6  11  -1   -8.60   21.20 
   6  11   1    2.30   20.40 
   6  11   1  -37.60   14.40 
   6  11   1    2.30   13.20 
   7 -11   1  191.28   23.10 
   7 -11   1  210.18   28.00 
  -7 -11  -1  219.98   23.00 
  -7 -11  -1  222.88   30.30 
  -7  11  -1  219.08   26.90 
  -7  11  -1  224.18   30.60 
  -7  11  -1  215.28   28.00 
   7  11   1  206.08   21.30 
  -7  11  -1  206.88   27.20 
   7  11   1  246.58   34.40 
   8 -11   1   50.89   25.60 
   8 -11   1   53.09   15.10 
  -8 -11  -1   36.10   18.40 
   8 -11   1   25.30   11.50 
  -8 -11  -1   63.89   28.00 
  -8  11  -1   52.39   25.90 
  -8  11  -1   36.70   12.50 
   8  11   1   31.90   29.00 
   8  11   1   42.70   17.90 
  -8  11  -1   74.39   28.50 
  -9 -11  -1   34.00   21.70 
   9 -11   1  139.29   32.80 
  -9 -11  -1   52.79   32.20 
   9 -11   1   62.79   13.20 
   9  11   1   22.60   31.90 
   9  11   1   40.90   18.60 
  -9  11  -1   10.70   11.80 
  -9  11  -1   51.69   30.40 
  -9  11  -1    9.00   30.10 
 -10 -11  -1   30.30   33.70 
  10 -11   1   15.20   17.40 
 -10 -11  -1  -10.40   23.10 
  10 -11   1   53.29   34.90 
  10  11   1   -5.60   36.00 
  10  11   1   -4.30   19.30 
 -10  11  -1  -27.60   30.40 
 -10  11  -1  -13.20   32.50 
 -11 -11  -1   -1.90   38.00 
 -11 -11  -1   49.99   30.20 
  11 -11   1   20.90   42.10 
  11  11   1   79.69   43.90 
  11  11   1   47.10   24.60 
 -11  11  -1   18.30   35.90 
 -11  11  -1   -1.70   38.10 
 -11 -12   1   99.19   37.80 
  11 -12  -1  147.29   22.70 
 -11 -12   1  134.29   32.10 
  11 -12  -1   76.49   38.70 
  11  12  -1  157.58   30.00 
 -11  12   1   90.29   42.40 
 -11  12   1   87.19   32.40 
  11  12  -1  168.68   43.50 
 -10 -12   1   21.20   23.50 
  10 -12  -1   14.90   32.70 
 -10 -12   1   -5.50   39.40 
  10 -12  -1   18.60   17.50 
 -10  12   1   34.20   33.90 
  10  12  -1   23.60   22.70 
  10  12  -1   38.40   36.30 
 -10  12   1   15.00   26.50 
 -10  12   1   34.30   17.90 
   9 -12  -1  421.66   32.50 
  -9 -12   1  450.35   49.20 
   9 -12  -1  410.36   50.79 
  -9 -12   1  477.95   33.50 
   9 -12  -1  433.06   30.00 
  -9 -12   1  401.66   36.70 
  -9  12   1  426.66   51.19 
   9  12  -1  517.75   39.10 
   9  12  -1  350.16   43.50 
  -9  12   1  428.46   38.70 
  -9  12   1  342.07   40.60 
   8 -12  -1  613.54   32.00 
  -8 -12   1  591.74   49.10 
  -8 -12   1  630.84   36.50 
  -8 -12   1  578.04   35.60 
   8 -12  -1  557.44   48.90 
   8 -12  -1  703.33   36.80 
  -8  12   1  591.24   41.20 
  -8  12   1  657.93   33.70 
  -8  12   1  573.34   51.49 
   8  12  -1  687.33   51.09 
   8  12  -1  579.14   39.60 
  -7 -12   1   93.49   16.60 
  -7 -12   1  138.99   18.00 
   7 -12  -1  128.09   15.00 
   7 -12  -1  142.89   17.80 
  -7 -12   1  124.99   25.90 
   7 -12  -1  143.69   26.20 
  -7  12   1  134.09   20.70 
   7  12  -1  107.39   26.60 
  -7  12   1  127.49   23.20 
   7  12  -1  167.78   23.10 
  -7  12   1  135.49   17.50 
   7  12  -1  132.39   21.80 
  -7  12   1  108.39   27.20 
   6 -12  -1  100.69   15.00 
  -6 -12   1   86.29   21.60 
   6 -12  -1   85.79   21.50 
  -6 -12   1   66.49   13.20 
  -6 -12   1   61.89   20.30 
   6 -12  -1  105.79   11.70 
  -6 -12   1  104.89   12.60 
   6  12  -1   74.19   16.10 
  -6  12   1   83.49   14.20 
  -6  12   1   66.09   22.50 
   6  12  -1   45.90   21.60 
   6  12  -1   90.59   17.10 
  -6  12   1   93.09   19.80 
  -6  12   1   93.59   15.50 
  -5 -12   1  509.35   21.90 
  -5 -12   1  569.94   34.50 
   5 -12  -1  505.15   33.80 
   5 -12  -1  551.44   27.80 
  -5 -12   1  556.64   28.30 
  -5 -12   1  503.05   33.50 
  -5  12   1  560.14   32.90 
   5  12  -1  520.45   38.70 
  -5  12   1  499.25   37.00 
   5  12  -1  509.35   32.20 
   5  12  -1  515.95   29.80 
  -5  12   1  560.24   26.40 
   4 -12  -1 1551.04   60.19 
   4 -12  -1 1572.04   54.59 
  -4 -12   1 1619.24   48.60 
  -4 -12   1 1601.44   55.79 
  -4 -12   1 1616.84   59.19 
  -4 -12   1 1424.96   57.09 
   4  12  -1 1619.24   58.09 
   4  12  -1 1583.14   62.29 
   4  12  -1 1510.45   56.19 
  -4  12   1 1592.64   52.09 
  -4  12   1 1605.54   54.39 
  -4  12   1 1589.44   61.29 
  -4  12   1 1592.54   58.49 
  -3 -12   1   67.99   11.50 
   3 -12  -1   38.50   13.70 
  -3 -12   1   41.80   12.50 
  -3 -12   1   57.69   12.80 
   3 -12  -1   44.30   11.30 
  -3  12   1   74.49   14.00 
  -3  12   1   52.49   10.60 
  -3  12   1   48.70    7.70 
   3  12  -1   47.60   11.80 
  -3  12   1   52.89   15.80 
   3  12  -1   50.79   12.30 
  -3  12   1   56.89    7.50 
   3  12  -1   67.69   16.70 
   2 -12  -1  523.45   26.80 
   2 -12  -1  525.15   24.60 
  -2 -12   1  544.35   24.20 
  -2 -12   1  488.95   26.20 
  -2 -12   1  549.85   25.70 
   2 -12  -1  472.45   28.40 
   2  12  -1  483.35   26.50 
  -2  12   1  539.75   25.90 
  -2  12   1  527.45   30.10 
  -2  12   1  520.35   23.60 
   2  12  -1  532.55   25.90 
   2  12  -1  482.85   25.30 
   2  12  -1  565.34   17.20 
  -2  12   1  546.95   20.40 
  -1 -12   1  714.93   28.00 
   1 -12  -1  640.74   24.50 
  -1 -12   1  644.94   28.40 
   1 -12  -1  658.23   28.30 
   1 -12  -1  713.33   27.30 
  -1  12   1  677.13   24.50 
  -1  12   1  699.73   27.00 
   1  12  -1  661.03   28.10 
   1  12  -1  664.93   28.40 
  -1  12   1  660.23   28.80 
  -1  12   1  649.43   27.10 
   1  12  -1  685.63   28.60 
   0 -12   1  887.51   35.20 
   0 -12  -1  985.80   32.50 
   0 -12  -1  883.41   33.10 
   0 -12  -1  937.71   35.20 
   0  12   1  984.70   35.00 
   0  12   1  880.21   33.40 
   0  12  -1  958.20   34.90 
   0  12   1  977.50   32.70 
   0  12  -1 1027.10   34.90 
   0  12   1  948.31   37.20 
   0  12  -1  936.01   34.80 
  -1 -12  -1   10.50    8.30 
  -1 -12  -1   15.90    8.90 
  -1 -12  -1   14.00    4.70 
   1 -12   1   12.20    7.60 
  -1 -12  -1   17.70    8.80 
   1  12   1   17.30    7.60 
   1  12   1   10.90    8.60 
   1  12   1   12.80    4.90 
   1  12   1   26.30   11.10 
  -1  12  -1   12.30    7.20 
  -1  12  -1   12.50    6.30 
  -1  12  -1   18.90    7.40 
   2 -12   1  818.62   30.60 
  -2 -12  -1  850.31   35.50 
  -2 -12  -1  861.91   25.90 
  -2 -12  -1  835.62   35.60 
  -2  12  -1  825.52   30.00 
   2  12   1  849.91   33.20 
  -2  12  -1  778.52   34.00 
   2  12   1  829.92   37.00 
  -2  12  -1  772.92   32.70 
  -2  12  -1  715.93   35.80 
   2  12   1  811.92   34.40 
   2  12   1  789.82   32.20 
  -3 -12  -1 1462.65   56.49 
  -3 -12  -1 1507.65   46.20 
   3 -12   1 1576.64   54.99 
   3 -12   1 1516.25   49.70 
  -3 -12  -1 1567.04   56.49 
   3  12   1 1481.75   57.89 
   3  12   1 1542.35   56.49 
  -3  12  -1 1491.35   53.59 
   3  12   1 1429.66   52.09 
   3  12   1 1544.45   52.49 
  -3  12  -1 1432.76   52.69 
  -3  12  -1 1481.35   49.00 
  -4 -12  -1 1344.07   56.49 
   4 -12   1 1358.16   54.29 
  -4 -12  -1 1440.76   45.60 
   4 -12   1 1383.76   46.80 
   4 -12   1 1401.26   50.39 
   4  12   1 1444.96   55.69 
   4  12   1 1421.56   59.09 
  -4  12  -1 1398.06   47.00 
  -4  12  -1 1413.56   52.19 
  -4  12  -1 1444.76   53.69 
   4  12   1 1420.26   50.59 
   4  12   1 1400.56   49.99 
   5 -12   1  -14.30   14.20 
   5 -12   1   12.10    7.10 
  -5 -12  -1    7.40    7.50 
  -5 -12  -1    5.30   15.20 
  -5 -12  -1  -23.70   18.10 
  -5 -12  -1    8.00    7.80 
   5 -12   1   -3.90    7.70 
  -5  12  -1    5.70   13.10 
  -5  12  -1   23.00   14.00 
  -5  12  -1    3.00    7.80 
   5  12   1   -9.10   19.50 
   5  12   1    6.90   11.50 
   5  12   1  -19.30   13.70 
  -6 -12  -1  412.96   36.70 
  -6 -12  -1  411.76   39.50 
   6 -12   1  441.36   26.60 
   6 -12   1  436.56   37.50 
  -6 -12  -1  467.85   27.10 
   6  12   1  435.66   28.80 
  -6  12  -1  437.76   33.10 
  -6  12  -1  433.66   39.90 
  -6  12  -1  454.85   32.50 
  -6  12  -1  429.86   24.20 
   6  12   1  383.06   38.50 
   6  12   1  400.96   36.20 
  -7 -12  -1  698.23   36.60 
  -7 -12  -1  585.04   49.80 
   7 -12   1  707.03   35.00 
   7 -12   1  680.63   30.40 
   7 -12   1  614.94   46.00 
  -7  12  -1  642.34   43.30 
  -7  12  -1  674.23   45.10 
   7  12   1  672.73   51.09 
  -7  12  -1  632.64   30.70 
   7  12   1  644.84   36.30 
  -7  12  -1  651.83   49.40 
   8 -12   1  296.87   22.80 
  -8 -12  -1  328.07   33.10 
  -8 -12  -1  260.27   34.60 
   8 -12   1  394.66   32.10 
   8 -12   1  365.36   44.40 
  -8  12  -1  282.57   38.90 
  -8  12  -1  320.57   21.50 
   8  12   1  316.77   41.10 
  -8  12  -1  319.87   33.80 
   8  12   1  259.67   30.60 
   9 -12   1   -4.70   29.60 
  -9 -12  -1  -13.20   35.00 
   9 -12   1   12.90   12.80 
  -9 -12  -1   19.90   19.80 
   9  12   1   20.80   19.30 
  -9  12  -1  -33.40   11.20 
   9  12   1    1.30   44.60 
  -9  12  -1    1.70   27.30 
  -9  12  -1  -11.70   37.50 
 -10 -12  -1  306.87   34.30 
  10 -12   1  302.87   46.00 
  10 -12   1  287.87   24.20 
 -10 -12  -1  284.87   41.90 
 -10  12  -1  337.17   46.50 
  10  12   1  323.47   48.70 
 -10  12  -1  223.38   40.30 
  10  12   1  286.47   30.10 
 -11 -12  -1  481.55   58.39 
 -11 -12  -1  368.26   47.20 
  11 -12   1  288.87   50.69 
 -11  12  -1  339.47   47.90 
 -11  12  -1  351.46   50.09 
  11  12   1  394.76   42.60 
  11  12   1  414.46   57.79 
 -11 -13   1  277.67   36.60 
  11 -13  -1  320.07   51.19 
 -11 -13   1  384.96   46.90 
  11 -13  -1  354.86   35.70 
 -11  13   1  315.37   51.29 
 -11  13   1  318.57   40.20 
  11  13  -1  421.26   54.79 
  11  13  -1  402.26   45.00 
  10 -13  -1 1000.70   70.99 
  10 -13  -1  929.91   46.00 
 -10 -13   1 1003.10   66.19 
 -10 -13   1  848.92   50.99 
  10  13  -1  857.81   71.69 
 -10  13   1  917.71   45.70 
  10  13  -1  944.81   54.69 
 -10  13   1  904.41   57.59 
 -10  13   1  917.11   67.39 
  -9 -13   1  651.33   40.10 
   9 -13  -1  751.92   36.90 
   9 -13  -1  609.64   56.39 
   9 -13  -1  714.83   39.00 
  -9 -13   1  572.64   53.09 
  -9  13   1  617.14   47.50 
   9  13  -1  630.04   61.69 
   9  13  -1  743.33   44.40 
  -9  13   1  600.64   55.59 
  -9  13   1  595.14   50.39 
   8 -13  -1  151.28   30.20 
  -8 -13   1  171.58   29.80 
   8 -13  -1  260.07   21.70 
   8 -13  -1  199.48   21.90 
  -8 -13   1  166.58   21.80 
  -8 -13   1  197.88   21.80 
   8  13  -1  194.98   26.10 
   8  13  -1  185.28   36.60 
  -8  13   1  185.08   20.50 
  -8  13   1  184.78   34.30 
  -8  13   1  208.78   24.90 
   7 -13  -1 1330.97   64.19 
   7 -13  -1 1418.36   50.79 
   7 -13  -1 1408.86   52.89 
  -7 -13   1 1349.47   51.19 
  -7 -13   1 1455.75   54.49 
  -7 -13   1 1248.08   61.59 
  -7  13   1 1376.06   55.69 
   7  13  -1 1363.16   57.29 
  -7  13   1 1266.57   66.39 
  -7  13   1 1340.67   64.39 
  -7  13   1 1402.16   52.69 
   7  13  -1 1286.57   66.09 
   6 -13  -1 1316.47   45.40 
  -6 -13   1 1221.78   55.19 
   6 -13  -1 1243.58   56.99 
  -6 -13   1 1238.68   55.69 
  -6 -13   1 1241.88   43.10 
   6 -13  -1 1211.98   47.90 
   6  13  -1 1136.09   58.09 
  -6  13   1 1237.78   48.70 
   6  13  -1 1212.18   50.79 
  -6  13   1 1248.28   47.20 
   6  13  -1 1207.68   52.89 
  -6  13   1 1262.47   55.29 
  -6  13   1 1212.28   59.99 
   5 -13  -1  119.99   21.40 
  -5 -13   1  112.79   21.70 
  -5 -13   1   96.99   17.80 
   5 -13  -1  125.29   14.30 
  -5 -13   1  122.49   11.40 
  -5 -13   1   96.49   13.70 
   5 -13  -1  118.89   14.80 
   5  13  -1  125.99   23.50 
  -5  13   1  103.79   15.40 
   5  13  -1  128.79   18.20 
  -5  13   1  108.59   19.00 
  -5  13   1  119.89   13.70 
  -5  13   1  130.79   23.00 
   5  13  -1  123.99   21.10 
  -4 -13   1  263.37   25.70 
   4 -13  -1  339.77   22.30 
  -4 -13   1  336.37   25.70 
  -4 -13   1  332.67   13.20 
   4 -13  -1  345.87   26.90 
  -4 -13   1  334.17   21.60 
   4  13  -1  359.16   31.40 
  -4  13   1  316.97   20.80 
   4  13  -1  302.97   23.90 
  -4  13   1  328.67   17.80 
   4  13  -1  351.16   24.50 
  -4  13   1  311.87   16.90 
  -4  13   1  335.07   24.90 
  -4  13   1  373.76   30.80 
   3 -13  -1 4178.08  137.89 
  -3 -13   1 4150.58  136.19 
  -3 -13   1 4595.54  137.49 
   3 -13  -1 4420.16  134.19 
  -3 -13   1 4478.25  134.99 
  -3  13   1 4318.77  130.99 
  -3  13   1 4422.66  130.69 
  -3  13   1 4371.96  137.29 
   3  13  -1 4264.47  137.59 
  -3  13   1 4599.34  134.29 
  -3  13   1 4569.74  138.89 
   3  13  -1 4516.35  136.99 
   3  13  -1 4302.87  135.29 
  -2 -13   1 2982.90   95.09 
   2 -13  -1 3075.19   98.59 
   2 -13  -1 3075.29   92.19 
   2 -13  -1 2989.80   95.19 
  -2 -13   1 2902.61   96.19 
  -2 -13   1 3082.19   96.69 
  -2  13   1 3107.79   96.99 
   2  13  -1 3076.89   96.69 
  -2  13   1 3054.89   91.99 
   2  13  -1 2973.70   97.59 
  -2  13   1 3086.39   97.69 
   2  13  -1 2965.50   96.19 
  -2  13   1 3077.89   95.29 
   2  13  -1 3195.38   88.69 
   1 -13  -1  164.38   14.10 
   1 -13  -1  116.79   11.20 
   1 -13  -1  122.59   13.10 
  -1 -13   1  112.19   13.40 
  -1  13   1  111.69   13.50 
   1  13  -1  138.69   14.10 
   1  13  -1  123.79   13.50 
  -1  13   1  130.19   13.80 
  -1  13   1  129.09   14.20 
  -1  13   1  122.19   11.20 
   0 -13   1  968.90   37.60 
   0 -13  -1  992.10   37.90 
   0 -13  -1 1067.89   34.40 
   0 -13  -1  918.71   35.00 
   0  13   1  996.30   35.40 
   0  13  -1 1091.69   36.60 
   0  13   1 1011.80   39.60 
   0  13  -1  868.31   36.50 
   0  13  -1  993.10   37.20 
   0  13   1  983.80   34.00 
   0  13   1  957.20   36.50 
   0  13  -1 1040.20   37.30 
  -1 -13  -1 3650.03  119.99 
  -1 -13  -1 4124.39  114.99 
   1 -13   1 3709.63  120.09 
  -1 -13  -1 4018.30  121.69 
   1  13   1 3845.22  121.99 
   1  13   1 3823.22  120.19 
  -1  13  -1 3996.70  119.99 
   1  13   1 3950.40  114.69 
   1  13   1 4059.39  119.99 
  -2 -13  -1 2051.19   59.49 
  -2 -13  -1 2078.99   69.39 
  -2 -13  -1 1933.81   68.49 
   2 -13   1 2002.60   67.09 
   2 -13   1 1984.30   65.69 
  -2  13  -1 1940.01   66.19 
   2  13   1 2036.40   70.49 
   2  13   1 1917.61   66.39 
  -2  13  -1 2009.20   65.59 
   2  13   1 2119.49   66.89 
  -2  13  -1 2005.00   64.29 
   2  13   1 2026.10   68.39 
  -2  13  -1 2038.60   67.19 
  -3 -13  -1   65.59    7.30 
  -3 -13  -1   74.59   13.90 
  -3 -13  -1   66.09   16.10 
   3 -13   1   42.10   13.00 
   3 -13   1   50.09    9.00 
  -3  13  -1   56.59    9.00 
   3  13   1   66.89   16.50 
   3  13   1   58.19   11.60 
  -3  13  -1   50.49   12.30 
   3  13   1   40.30   10.70 
  -3  13  -1   42.90   11.40 
  -3  13  -1   56.69   10.00 
   3  13   1   48.10   13.40 
  -4 -13  -1  825.52   39.40 
   4 -13   1  789.72   38.70 
   4 -13   1  792.92   31.40 
  -4 -13  -1  796.22   28.00 
  -4 -13  -1  753.02   40.00 
   4  13   1  766.12   34.70 
  -4  13  -1  817.82   36.30 
   4  13   1  820.12   40.30 
  -4  13  -1  774.02   37.30 
   4  13   1  879.91   34.70 
   4  13   1  821.72   43.80 
  -4  13  -1  797.02   30.90 
  -5 -13  -1 2106.09   78.29 
   5 -13   1 2082.09   72.09 
  -5 -13  -1 2069.09   67.59 
  -5 -13  -1 2100.49   79.29 
  -5 -13  -1 2164.58   66.99 
   5 -13   1 2161.38   77.49 
   5  13   1 2087.69   81.39 
  -5  13  -1 2041.70   74.19 
   5  13   1 2249.77   72.29 
  -5  13  -1 2071.89   82.19 
  -5  13  -1 2141.19   76.69 
   5  13   1 2058.69   71.99 
   5  13   1 2086.29   77.29 
  -6 -13  -1  813.72   48.90 
   6 -13   1  880.21   46.80 
   6 -13   1  869.91   34.30 
  -6 -13  -1  799.12   45.80 
   6 -13   1  876.11   43.30 
  -6  13  -1  830.82   34.30 
   6  13   1  886.71   40.40 
  -6  13  -1  922.91   45.10 
   6  13   1  780.02   46.40 
   6  13   1  822.82   52.49 
  -6  13  -1  863.81   52.39 
  -6  13  -1  859.11   44.40 
  -7 -13  -1  373.86   43.90 
   7 -13   1  341.87   39.40 
  -7 -13  -1  382.36   29.20 
   7 -13   1  385.86   27.20 
   7 -13   1  354.56   23.50 
  -7  13  -1  347.67   39.20 
  -7  13  -1  389.46   38.40 
  -7  13  -1  346.87   22.40 
   7  13   1  366.16   31.10 
   7  13   1  365.96   45.90 
  -7  13  -1  399.76   45.70 
   8 -13   1  997.10   40.00 
   8 -13   1  970.20   59.79 
  -8 -13  -1  959.20   47.10 
   8 -13   1 1191.88   53.79 
  -8 -13  -1 1063.09   62.79 
  -8  13  -1 1058.99   58.39 
   8  13   1 1052.09   48.30 
  -8  13  -1  910.91   61.59 
   8  13   1  920.81   62.89 
   8  13   1  989.70   44.70 
  -8  13  -1  983.90   39.10 
   9 -13   1 1101.49   69.39 
  -9 -13  -1 1023.80   52.29 
  -9 -13  -1 1005.70   82.39 
   9 -13   1 1143.59   43.20 
   9  13   1  960.00   78.89 
   9  13   1 1113.59   49.20 
   9  13   1 1102.49   51.89 
  -9  13  -1 1116.49   41.50 
  -9  13  -1 1159.18   64.19 
  -9  13  -1  876.61   77.19 
  10 -13   1  376.36   26.80 
 -10 -13  -1  358.36   48.60 
  10 -13   1  286.87   44.90 
 -10 -13  -1  318.87   34.10 
  10  13   1  405.26   52.39 
 -10  13  -1  346.87   42.60 
 -10  13  -1  382.36   52.39 
  10  13   1  334.57   39.00 
  11 -13   1   24.60   40.00 
 -11 -13  -1   83.49   44.10 
 -11 -13  -1   68.39   29.70 
  11  13   1   17.20   45.70 
  11  13   1   26.20   25.60 
 -11  13  -1  -42.80   38.60 
 -11  13  -1   -2.90   36.40 
 -11 -14   1   68.59   37.80 
  11 -14  -1   94.39   40.80 
  11 -14  -1   95.09   23.30 
 -11 -14   1   93.99   27.80 
  11  14  -1  135.99   45.90 
  11  14  -1   93.19   29.00 
 -11  14   1   43.30   42.70 
 -11  14   1  108.09   33.20 
 -10 -14   1  -10.10   32.60 
 -10 -14   1  -13.80   21.60 
  10 -14  -1   12.50   32.30 
  10 -14  -1   10.10   18.30 
  10  14  -1   -2.20   35.50 
 -10  14   1  -23.80   30.90 
  10  14  -1    6.10   23.70 
 -10  14   1   14.90   21.50 
 -10  14   1    6.20   25.50 
  -9 -14   1   95.19   21.70 
   9 -14  -1  147.99   21.60 
   9 -14  -1  152.58   35.60 
   9 -14  -1  132.39   17.70 
  -9 -14   1  132.39   32.50 
   9  14  -1  143.29   36.40 
  -9  14   1  123.29   19.20 
  -9  14   1   96.49   33.50 
  -9  14   1   95.69   25.80 
   9  14  -1  126.19   24.70 
   8 -14  -1  499.05   49.30 
  -8 -14   1  472.15   33.10 
   8 -14  -1  593.64   30.20 
  -8 -14   1  469.35   31.90 
  -8 -14   1  435.16   46.30 
   8 -14  -1  484.15   33.00 
   8  14  -1  484.45   38.00 
  -8  14   1  533.85   32.40 
   8  14  -1  495.05   52.49 
  -8  14   1  493.05   49.50 
  -8  14   1  454.65   38.80 
   7 -14  -1  261.77   36.20 
   7 -14  -1  345.37   22.20 
  -7 -14   1  253.57   31.30 
  -7 -14   1  273.37   25.20 
   7 -14  -1  314.57   26.50 
  -7  14   1  301.97   30.70 
  -7  14   1  304.07   25.80 
   7  14  -1  303.87   37.40 
  -7  14   1  264.27   36.50 
   7  14  -1  327.87   32.20 
  -6 -14   1   -8.70   10.10 
  -6 -14   1   -4.20    7.20 
  -6 -14   1   -0.10   19.60 
   6 -14  -1    2.10   16.50 
  -6 -14   1    7.30   17.80 
   6 -14  -1   -4.70    7.70 
   6 -14  -1    2.30   11.90 
  -6  14   1  -14.10   11.80 
   6  14  -1   32.70   16.70 
   6  14  -1   -3.40   22.00 
  -6  14   1   -1.20   15.50 
  -6  14   1  -15.50   19.80 
   6  14  -1   13.40   15.30 
  -6  14   1    3.30   13.00 
   5 -14  -1  655.63   39.20 
  -5 -14   1  619.24   35.90 
  -5 -14   1  628.64   31.30 
   5 -14  -1  661.33   32.00 
  -5 -14   1  655.73   36.10 
  -5 -14   1  665.33   23.80 
  -5  14   1  638.14   30.00 
   5  14  -1  666.73   42.70 
   5  14  -1  655.13   35.00 
  -5  14   1  789.02   49.60 
   5  14  -1  677.13   35.10 
  -5  14   1  593.34   39.50 
  -5  14   1  661.33   31.00 
  -4 -14   1 1832.72   64.99 
   4 -14  -1 1773.22   60.49 
  -4 -14   1 1689.23   64.49 
  -4 -14   1 1797.22   61.69 
   4 -14  -1 1682.83   66.09 
   4  14  -1 1748.82   62.89 
   4  14  -1 1642.54   65.89 
  -4  14   1 1849.11   60.69 
  -4  14   1 1700.33   67.59 
  -4  14   1 1780.92   64.59 
   4  14  -1 1705.43   63.39 
  -4  14   1 1767.02   57.49 
  -4  14   1 1848.32   57.19 
   3 -14  -1  173.08   21.90 
  -3 -14   1  124.39   16.00 
  -3 -14   1  163.98   19.60 
  -3 -14   1  159.48   16.20 
   3 -14  -1  139.09   17.30 
  -3  14   1  176.68   21.40 
  -3  14   1  148.89   12.30 
   3  14  -1  151.18   18.00 
   3  14  -1  138.49   16.00 
   3  14  -1  130.39   18.80 
  -3  14   1  147.69   12.10 
  -3  14   1  142.09   16.60 
  -3  14   1  153.28   19.20 
   2 -14  -1  190.38   21.20 
   2 -14  -1  166.28   13.50 
  -2 -14   1  185.98   20.60 
  -2 -14   1  209.98   18.40 
   2 -14  -1  194.68   19.40 
  -2  14   1  180.88   13.40 
   2  14  -1  226.88   22.60 
  -2  14   1  259.37   21.70 
  -2  14   1  192.38   19.70 
   2  14  -1  186.48   19.70 
   2  14  -1  204.68    9.20 
  -2  14   1  187.58   16.90 
   2  14  -1  237.58   18.00 
   1 -14  -1  604.34   25.50 
  -1 -14   1  520.45   25.90 
  -1 -14   1  557.94   25.60 
   1 -14  -1  536.75   26.70 
   1 -14  -1  541.65   22.70 
  -1  14   1  598.34   26.10 
  -1  14   1  597.44   27.70 
   1  14  -1  546.85   26.20 
   1  14  -1  558.94   27.60 
  -1  14   1  526.45   22.70 
  -1  14   1  560.24   25.40 
   1  14  -1  567.84   26.10 
   1  14  -1  565.54   27.60 
  -1  14   1  552.54   29.20 
   0 -14   1  789.22   34.40 
   0 -14  -1  939.81   31.90 
   0 -14  -1  824.82   34.40 
   0 -14  -1  883.21   32.90 
   0  14   1  875.31   33.00 
   0  14  -1  880.51   33.80 
   0  14   1  886.31   34.50 
   0  14  -1  882.71   33.60 
   0  14  -1  899.21   37.80 
   0  14   1  867.11   37.40 
   0  14  -1  838.62   34.30 
   0  14   1  900.11   31.70 
  -1 -14  -1   39.20   10.90 
  -1 -14  -1   36.90    6.00 
  -1 -14  -1   30.70   10.70 
   1 -14   1   28.80   10.50 
   1  14   1   22.50    5.80 
  -1  14  -1   34.00    8.60 
  -1  14  -1   17.70    8.60 
   1  14   1   28.50   10.10 
  -1  14  -1   13.70    7.90 
   1  14   1   36.90    9.70 
   1  14   1   32.10   12.40 
  -2 -14  -1   99.99    6.80 
  -2 -14  -1  107.09   16.00 
   2 -14   1  108.29   14.70 
   2 -14   1  114.39   12.90 
  -2 -14  -1  121.49   16.00 
  -2  14  -1  106.99   13.00 
  -2  14  -1  120.69   14.10 
   2  14   1  121.29   13.80 
  -2  14  -1  111.39   13.60 
   2  14   1   75.29   13.80 
  -2  14  -1  100.79   13.10 
   2  14   1  112.19   17.40 
   2  14   1   94.59   13.10 
  -3 -14  -1  921.31   42.70 
   3 -14   1 1022.90   41.70 
  -3 -14  -1  979.50   42.50 
  -3 -14  -1 1013.90   30.40 
   3 -14   1  985.40   36.90 
  -3  14  -1  945.11   38.80 
   3  14   1 1017.80   45.00 
   3  14   1 1021.40   42.80 
   3  14   1  944.51   39.00 
  -3  14  -1  936.41   36.00 
   3  14   1 1023.10   38.70 
  -3  14  -1  969.30   38.10 
  -3  14  -1  936.51   39.70 
  -4 -14  -1 1681.33   52.79 
  -4 -14  -1 1614.04   69.29 
  -4 -14  -1 1684.33   65.39 
   4 -14   1 1685.53   57.29 
  -4 -14  -1 1682.03   53.39 
   4 -14   1 1737.73   63.69 
  -4  14  -1 1758.72   57.19 
   4  14   1 1714.63   60.49 
   4  14   1 1838.12   72.09 
   4  14   1 1694.23   67.39 
   4  14   1 1785.62   60.09 
  -4  14  -1 1697.63   61.29 
  -4  14  -1 1767.72   63.39 
   5 -14   1   13.90    9.50 
   5 -14   1   -2.50    9.60 
  -5 -14  -1   34.80    7.50 
   5 -14   1    2.60   15.30 
  -5 -14  -1   18.80   14.60 
  -5 -14  -1    8.40    7.30 
  -5 -14  -1   -2.20   16.00 
  -5  14  -1   27.50    9.50 
   5  14   1   22.50   11.10 
   5  14   1   24.50   14.20 
  -5  14  -1   -2.30   12.80 
  -5  14  -1   18.40   14.40 
   5  14   1   10.10   15.80 
  -5  14  -1    5.00   18.60 
   5  14   1   43.00   22.20 
  -6 -14  -1  613.34   44.50 
  -6 -14  -1  610.24   26.70 
  -6 -14  -1  533.35   40.90 
  -6 -14  -1  570.44   27.20 
   6 -14   1  617.34   28.30 
   6 -14   1  565.74   39.80 
   6  14   1  600.84   31.80 
   6  14   1  569.24   33.90 
   6  14   1  545.75   47.70 
  -6  14  -1  639.44   39.10 
  -6  14  -1  520.95   44.60 
  -6  14  -1  585.14   38.60 
  -6  14  -1  589.94   27.60 
  -7 -14  -1  546.25   28.00 
   7 -14   1  575.44   32.20 
   7 -14   1  563.84   44.60 
   7 -14   1  565.24   28.00 
  -7 -14  -1  518.85   31.80 
  -7 -14  -1  569.04   49.00 
   7  14   1  537.05   31.70 
  -7  14  -1  538.85   43.20 
  -7  14  -1  548.95   43.40 
   7  14   1  526.55   34.80 
   7  14   1  483.55   49.80 
  -7  14  -1  513.05   48.80 
  -8 -14  -1  152.98   20.90 
   8 -14   1  141.19   30.10 
   8 -14   1  165.78   16.90 
  -8 -14  -1  172.88   33.50 
   8  14   1  150.18   18.70 
   8  14   1  181.08   23.40 
  -8  14  -1  166.68   29.50 
   8  14   1  171.28   35.80 
  -8  14  -1  155.38   16.10 
  -8  14  -1  213.78   37.30 
  -9 -14  -1   48.60   20.80 
   9 -14   1   55.89   14.20 
   9 -14   1   11.00   30.00 
  -9 -14  -1   22.60   32.00 
  -9  14  -1  -11.50   27.10 
   9  14   1   31.20   21.40 
   9  14   1  -33.20   17.30 
   9  14   1   44.40   34.00 
  -9  14  -1   36.10   33.50 
  -9  14  -1   22.10   13.10 
 -10 -14  -1  101.29   27.40 
  10 -14   1  141.09   40.10 
 -10 -14  -1   93.69   38.30 
 -10  14  -1  141.69   36.60 
  10  14   1  108.79   24.30 
  10  14   1  160.98   46.00 
 -10  14  -1   79.49   35.50 
 -11  14  -1  314.37   56.29 
 -11 -15   1   57.69   26.50 
 -11 -15   1   30.80   39.10 
  11 -15  -1   34.00   39.10 
  11 -15  -1   61.09   23.00 
  11  15  -1   64.99   29.10 
  11  15  -1   77.09   46.40 
 -11  15   1    8.90   39.70 
 -11  15   1   83.99   30.30 
  10 -15  -1  -18.30   17.50 
  10 -15  -1   -3.10   34.30 
 -10 -15   1   58.79   35.50 
 -10 -15   1  -15.50   21.20 
  10  15  -1   13.40   35.40 
 -10  15   1    9.90   25.10 
  10  15  -1   26.30   24.90 
 -10  15   1   -4.80   32.90 
  -9 -15   1   -3.30   16.10 
   9 -15  -1   -1.50   14.40 
  -9 -15   1  -20.10   26.90 
   9 -15  -1  -10.20   27.80 
   9 -15  -1  -15.90   16.20 
   9  15  -1   10.30   20.60 
   9  15  -1   15.30   34.10 
  -9  15   1  -13.70   33.20 
  -9  15   1   34.30   17.40 
  -9  15   1  -22.50   23.00 
   8 -15  -1   32.70   23.00 
  -8 -15   1    4.50   18.60 
   8 -15  -1   -0.50   16.00 
  -8 -15   1  -17.10   24.30 
  -8 -15   1    2.10   14.30 
  -8  15   1   10.70   28.50 
   8  15  -1    1.20   28.70 
   8  15  -1  -25.80   18.70 
  -8  15   1  -20.80   16.50 
  -8  15   1   -0.30   19.50 
  -7 -15   1   23.40   14.60 
   7 -15  -1   12.30   22.80 
  -7 -15   1   43.90   11.20 
   7 -15  -1   28.50    9.80 
  -7 -15   1   51.29   25.80 
   7 -15  -1   35.90   14.80 
   7  15  -1   48.50   18.60 
   7  15  -1   30.40   24.60 
  -7  15   1   24.10   16.60 
  -7  15   1   -6.40   22.70 
  -7  15   1   40.70   15.50 
   6 -15  -1   74.69   16.00 
   6 -15  -1   80.69   22.10 
  -6 -15   1  100.49   21.70 
  -6 -15   1   91.39   22.20 
  -6 -15   1   96.79   10.80 
  -6 -15   1  125.19   16.10 
  -6  15   1   79.99   26.70 
  -6  15   1  116.79   21.80 
  -6  15   1   91.69   16.40 
   6  15  -1  115.59   20.40 
   6  15  -1   93.89   20.10 
   6  15  -1  144.89   28.20 
  -6  15   1  105.09   16.40 
  -5 -15   1  -21.50   12.70 
   5 -15  -1    3.70   11.40 
  -5 -15   1   -3.40    4.90 
  -5 -15   1   -9.50   15.00 
   5 -15  -1   14.50   16.20 
   5  15  -1    3.10   12.60 
   5  15  -1   -5.50   12.70 
  -5  15   1   14.70   15.20 
   5  15  -1   19.10   21.20 
  -5  15   1  -26.10   18.50 
  -5  15   1   -4.60    9.70 
  -5  15   1   -1.50   10.30 
  -4 -15   1  139.49   18.60 
  -4 -15   1  139.89   15.30 
   4 -15  -1  118.99   16.00 
  -4 -15   1  133.39   19.40 
   4 -15  -1  135.59   20.60 
  -4  15   1  135.99   12.90 
   4  15  -1   74.29   19.30 
   4  15  -1  114.69   16.00 
  -4  15   1  145.49   17.20 
  -4  15   1   86.19   16.30 
  -4  15   1  132.09   13.60 
  -4  15   1  131.59   21.70 
   4  15  -1   87.59   15.20 
   3 -15  -1  201.58   23.50 
  -3 -15   1  200.78   19.90 
  -3 -15   1  169.88   20.10 
   3 -15  -1  199.18   20.00 
  -3 -15   1  170.28   17.10 
   3  15  -1  203.48   24.70 
  -3  15   1  200.48   17.30 
  -3  15   1  173.78   13.60 
   3  15  -1  197.58   22.10 
  -3  15   1  192.38   13.30 
   3  15  -1  201.78   21.20 
  -3  15   1  204.78   21.70 
  -3  15   1  167.58   20.10 
   2 -15  -1   21.50    7.40 
  -2 -15   1    7.80   11.50 
   2 -15  -1   14.90   12.60 
  -2 -15   1   23.40   11.00 
   2 -15  -1    5.70   11.00 
  -2  15   1   29.60    7.10 
   2  15  -1   38.90   11.50 
   2  15  -1   34.90   14.10 
  -2  15   1   36.20   11.00 
  -2  15   1   25.50   12.20 
   2  15  -1   21.70    4.40 
   2  15  -1   15.80   11.80 
  -2  15   1   21.00    9.70 
  -1 -15   1  110.39   14.80 
  -1 -15   1  110.89   14.70 
   1 -15  -1   77.39   13.00 
   1 -15  -1  120.09   12.10 
  -1  15   1   99.79   12.40 
  -1  15   1   85.99   12.70 
  -1  15   1   95.29   12.20 
   1  15  -1  117.89   15.60 
   1  15  -1  125.49   16.20 
  -1  15   1   89.59   15.50 
   1  15  -1   96.99   14.00 
  -1  15   1  117.29   13.60 
   1  15  -1  109.29   13.40 
   0 -15   1  156.08   17.40 
   0 -15  -1  132.89   15.10 
   0 -15  -1  169.38   13.60 
   0  15  -1  136.59   15.80 
   0  15   1  179.38   14.40 
   0  15  -1  163.48   17.60 
   0  15   1  140.89   15.20 
   0  15   1  155.58   20.80 
   0  15  -1  152.58   15.20 
   0  15   1  132.99   14.90 
   0  15  -1  161.58   18.30 
  -1 -15  -1   73.59    9.00 
  -1 -15  -1   58.79   12.50 
  -1 -15  -1   52.49   11.40 
   1 -15   1   71.79   12.10 
   1  15   1   92.89   13.70 
  -1  15  -1   67.69   10.30 
  -1  15  -1   97.29   11.20 
   1  15   1   73.09   12.50 
   1  15   1   59.69   13.90 
  -1  15  -1   49.80   10.90 
  -1  15  -1   55.49   11.80 
   1  15   1   65.29    7.30 
  -2 -15  -1  109.99    6.90 
   2 -15   1  120.59   13.70 
   2 -15   1  113.69   14.60 
  -2 -15  -1  107.09   14.70 
  -2 -15  -1   97.99   14.60 
   2  15   1   89.39   14.60 
  -2  15  -1  118.69   13.50 
  -2  15  -1  122.29   14.90 
  -2  15  -1  110.69   11.50 
   2  15   1  117.39   13.70 
  -2  15  -1   95.59   12.60 
   2  15   1  105.39   14.40 
   2  15   1   95.99   16.40 
  -3 -15  -1   71.39   16.80 
   3 -15   1   88.69   12.30 
  -3 -15  -1   91.49   15.80 
   3 -15   1   64.69   14.40 
   3  15   1   99.59   13.60 
   3  15   1  103.89   16.10 
   3  15   1   82.99   13.60 
  -3  15  -1  107.09   15.10 
  -3  15  -1  108.49   12.90 
  -3  15  -1  120.09   14.60 
  -3  15  -1   95.49   14.40 
   3  15   1   80.49   17.40 
  -4 -15  -1  135.89   18.10 
   4 -15   1  164.08   18.00 
   4 -15   1   95.89   17.50 
  -4 -15  -1  137.09    9.80 
  -4 -15  -1  139.49    9.40 
  -4 -15  -1  117.79   19.90 
   4  15   1  199.68   25.20 
  -4  15  -1  137.09   16.60 
  -4  15  -1  179.28   15.50 
   4  15   1  126.89   15.50 
  -4  15  -1  153.68   18.30 
   4  15   1  149.49   21.00 
   4  15   1  151.28   18.30 
  -5 -15  -1  147.79   24.90 
  -5 -15  -1  126.59   12.70 
  -5 -15  -1  147.39   20.30 
   5 -15   1  126.39   21.60 
   5 -15   1  133.59   14.60 
  -5 -15  -1  142.89   12.60 
  -5  15  -1  151.18   22.90 
  -5  15  -1  100.39   17.60 
   5  15   1  129.89   15.60 
  -5  15  -1  120.49   12.90 
   5  15   1  147.69   22.30 
   5  15   1  168.38   19.20 
   5  15   1  146.99   26.00 
  -5  15  -1  124.89   24.00 
   6 -15   1   11.40   11.70 
   6 -15   1   -3.80   12.10 
  -6 -15  -1   -7.10   20.90 
  -6 -15  -1   22.90    9.40 
   6 -15   1   17.50   19.00 
  -6 -15  -1  -13.80    8.70 
   6  15   1  -17.90   14.30 
   6  15   1    8.20   24.10 
   6  15   1   22.10   11.90 
  -6  15  -1   33.20   17.90 
  -6  15  -1    0.40   10.10 
  -6  15  -1   20.60   16.80 
  -6  15  -1   23.30   23.40 
  -7 -15  -1   77.19   12.80 
   7 -15   1   87.89   14.50 
   7 -15   1   95.39   15.60 
  -7 -15  -1   45.60   27.50 
  -7 -15  -1   62.09   15.60 
   7 -15   1   87.29   23.60 
  -7  15  -1   98.19   14.10 
   7  15   1   65.79   30.20 
   7  15   1   46.80   18.50 
   7  15   1   80.89   15.10 
  -7  15  -1   91.79   24.70 
  -7  15  -1   80.19   29.90 
  -8 -15  -1   -7.20   13.00 
   8 -15   1   37.70   13.40 
   8 -15   1   40.10   25.50 
  -8 -15  -1   26.80   16.30 
  -8 -15  -1   26.50   28.60 
  -8  15  -1   11.80   28.00 
   8  15   1   -8.00   30.30 
  -8  15  -1   60.89   26.80 
  -8  15  -1   50.19   12.90 
   8  15   1   11.80   19.10 
   8  15   1    5.50   15.10 
  -9 -15  -1  -16.30   18.80 
   9 -15   1   -5.40   14.00 
  -9 -15  -1  -35.60   16.30 
  -9 -15  -1   34.80   31.10 
   9 -15   1  -46.20   28.90 
  -9  15  -1   18.40   33.20 
  -9  15  -1   18.80   28.60 
   9  15   1   35.30   21.30 
  -9  15  -1    2.70   13.60 
   9  15   1  -35.20   34.20 
   9  15   1   14.60   20.30 
 -10 -15  -1  -15.00   33.00 
 -10 -15  -1   28.30   22.60 
  10 -15   1   26.80   38.30 
 -10  15  -1   69.99   37.70 
  10  15   1   22.50   41.70 
 -10  15  -1  -11.80   31.70 
  10  15   1   32.10   22.40 
 -11 -16   1  163.68   28.70 
  11 -16  -1  128.89   42.80 
  11 -16  -1  185.48   26.70 
 -11 -16   1  232.58   43.80 
 -11  16   1  114.19   46.60 
  11  16  -1  172.68   34.80 
  11  16  -1  214.88   50.49 
 -11  16   1  141.29   34.30 
  10 -16  -1   50.79   32.50 
 -10 -16   1    8.40   20.70 
  10 -16  -1   51.29   21.00 
 -10 -16   1   56.69   34.90 
  10  16  -1   58.89   25.30 
 -10  16   1  -19.70   36.80 
 -10  16   1   -5.90   26.80 
  10  16  -1   10.80   36.30 
  -9 -16   1  416.76   49.60 
   9 -16  -1  453.55   33.90 
   9 -16  -1  428.36   50.79 
  -9 -16   1  463.75   32.90 
   9 -16  -1  479.65   30.50 
  -9  16   1  512.55   42.90 
   9  16  -1  468.15   42.10 
   9  16  -1  303.97   62.09 
  -9  16   1  458.85   34.20 
   8 -16  -1 1577.44   60.59 
  -8 -16   1 1473.25   55.89 
  -8 -16   1 1563.74   73.99 
   8 -16  -1 1457.25   73.19 
   8 -16  -1 1748.93   61.69 
  -8  16   1 1522.75   64.49 
  -8  16   1 1414.36   73.99 
  -8  16   1 1518.75   59.59 
   8  16  -1 1557.84   66.19 
   8  16  -1 1468.15   76.59 
   7 -16  -1  264.97   26.60 
  -7 -16   1  239.08   25.40 
   7 -16  -1  259.87   31.90 
  -7 -16   1  240.58   18.90 
  -7 -16   1  217.98   29.20 
  -7  16   1  255.17   28.50 
  -7  16   1  280.17   35.40 
   7  16  -1  233.68   26.30 
   7  16  -1  206.38   34.50 
  -7  16   1  213.58   26.40 
  -6 -16   1  164.68   12.80 
  -6 -16   1  176.38   18.60 
   6 -16  -1  185.18   25.80 
  -6 -16   1  115.89   22.10 
  -6 -16   1  125.69   23.30 
   6 -16  -1  168.28   18.80 
  -6  16   1  163.98   18.00 
   6  16  -1  150.38   20.50 
  -6  16   1  170.28   18.30 
  -6  16   1  127.79   28.00 
   6  16  -1  114.19   19.40 
  -6  16   1  180.08   30.00 
   6  16  -1  161.28   29.70 
   5 -16  -1  669.93   33.80 
   5 -16  -1  694.03   40.90 
  -5 -16   1  707.73   39.40 
  -5 -16   1  717.13   34.20 
  -5 -16   1  690.23   37.30 
  -5  16   1  651.43   31.80 
   5  16  -1  668.03   44.30 
   5  16  -1  668.43   36.80 
  -5  16   1  722.83   39.80 
  -5  16   1  711.13   44.60 
  -5  16   1  714.43   29.40 
  -5  16   1  714.93   32.50 
   5  16  -1  755.92   37.40 
   4 -16  -1 1258.77   49.50 
  -4 -16   1 1260.27   52.19 
   4 -16  -1 1358.36   55.89 
  -4 -16   1 1318.07   53.89 
  -4 -16   1 1322.27   50.09 
  -4  16   1 1312.57   56.49 
  -4  16   1 1390.06   54.19 
   4  16  -1 1391.16   57.49 
  -4  16   1 1397.86   49.40 
  -4  16   1 1246.18   46.00 
   4  16  -1 1244.18   51.19 
  -4  16   1 1360.76   45.10 
  -3 -16   1  238.08   24.20 
   3 -16  -1  239.48   21.20 
  -3 -16   1  260.07   22.20 
   3 -16  -1  261.17   24.90 
  -3  16   1  254.37   22.30 
  -3  16   1  246.48   19.50 
  -3  16   1  303.47   26.10 
  -3  16   1  259.57   15.50 
  -3  16   1  222.78   15.00 
   3  16  -1  237.28   22.00 
   3  16  -1  235.98   22.80 
   3  16  -1  244.78   26.30 
   2 -16  -1  566.84   31.60 
  -2 -16   1  606.74   29.30 
   2 -16  -1  570.04   24.20 
  -2 -16   1  550.34   30.00 
   2 -16  -1  560.04   29.10 
  -2  16   1  554.44   27.60 
  -2  16   1  552.64   29.90 
  -2  16   1  577.94   23.80 
   2  16  -1  575.04   32.00 
   2  16  -1  603.54   30.00 
   2  16  -1  562.94   19.40 
   2  16  -1  606.34   30.00 
  -2  16   1  639.54   31.10 
   2  16  -1  600.74   19.40 
  -1 -16   1 4236.18  126.29 
   1 -16  -1 4064.39  125.99 
  -1 -16   1 3816.72  125.19 
   1 -16  -1 3983.60  122.49 
  -1  16   1 3965.40  127.29 
   1  16  -1 3989.50  125.49 
   1  16  -1 4041.20  126.79 
   1  16  -1 4252.77  125.49 
  -1  16   1 4035.00  122.69 
  -1  16   1 3949.50  123.89 
   1  16  -1 4064.39  125.39 
  -1  16   1 4221.98  127.69 
  -1  16   1 4044.50  125.09 
   0 -16  -1 2072.59   72.19 
   0 -16  -1 2128.29   69.79 
   0 -16   1 2051.69   71.29 
   0  16  -1 2136.79   72.29 
   0  16  -1 2206.08   71.89 
   0  16   1 2134.79   69.89 
   0  16   1 2122.19   74.09 
   0  16  -1 2137.99   70.39 
   0  16   1 2177.88   67.79 
   0  16  -1 2220.38   70.99 
   0  16  -1 2131.29   71.39 
   0  16   1 2279.67   71.99 
  -1 -16  -1   10.60   10.60 
  -1 -16  -1    6.20    5.40 
   1 -16   1    8.00    9.70 
  -1 -16  -1    2.30   10.00 
   1  16   1   26.80   13.20 
   1  16   1   14.30   10.20 
   1  16   1    0.30    5.40 
  -1  16  -1   10.70    9.40 
  -1  16  -1  -12.00    7.80 
  -1  16  -1    5.10   10.20 
  -1  16  -1    3.90    7.70 
   1  16   1   -0.60    9.50 
  -2 -16  -1  144.19   18.80 
  -2 -16  -1  129.89   16.60 
   2 -16   1  146.19   19.80 
   2  16   1  133.59    7.30 
   2  16   1  150.98   16.50 
   2  16   1  142.89   17.00 
  -2  16  -1  138.99   14.20 
  -2  16  -1  152.88   15.70 
  -2  16  -1  122.39   14.50 
   2  16   1  137.39   16.60 
  -2  16  -1  158.68   17.20 
   2  16   1  134.59   18.90 
  -3 -16  -1 2021.70   71.69 
   3 -16   1 1985.70   69.69 
  -3 -16  -1 1933.81   71.09 
   3 -16   1 2038.90   66.59 
  -3  16  -1 1903.61   67.59 
  -3  16  -1 2019.70   69.59 
  -3  16  -1 1932.01   66.39 
   3  16   1 1961.50   70.69 
   3  16   1 2019.40   67.79 
   3  16   1 1952.40   73.29 
   3  16   1 1984.60   68.09 
  -3  16  -1 1991.70   64.99 
   4 -16   1  577.34   34.00 
  -4 -16  -1  578.14   36.90 
  -4 -16  -1  604.14   32.40 
   4 -16   1  564.04   28.20 
  -4 -16  -1  546.85   18.70 
  -4 -16  -1  591.64   19.10 
   4  16   1  570.84   31.10 
  -4  16  -1  573.44   26.30 
   4  16   1  606.04   29.60 
  -4  16  -1  528.35   32.00 
  -4  16  -1  539.05   27.80 
   4  16   1  591.04   34.80 
   4  16   1  578.04   38.60 
  -4  16  -1  524.35   30.80 
  -4  16  -1  585.64   39.90 
  -5 -16  -1   15.10    6.60 
   5 -16   1   19.90   16.00 
  -5 -16  -1   40.30   19.10 
  -5 -16  -1   29.00   16.10 
   5 -16   1   24.80   10.90 
  -5 -16  -1   15.70    6.50 
   5  16   1   -3.60   15.70 
  -5  16  -1   29.30   10.40 
   5  16   1   23.40   14.50 
  -5  16  -1   37.20   14.40 
   5  16   1    0.10   20.70 
  -5  16  -1   21.60   22.50 
  -5  16  -1   27.00   15.00 
  -6 -16  -1  439.26   21.50 
   6 -16   1  464.65   27.20 
  -6 -16  -1  452.35   22.00 
  -6 -16  -1  394.86   39.30 
   6 -16   1  429.86   26.80 
   6 -16   1  430.96   38.50 
  -6  16  -1  464.65   35.40 
   6  16   1  486.05   29.90 
   6  16   1  415.96   46.50 
  -6  16  -1  421.26   25.80 
  -6  16  -1  515.55   38.00 
   6  16   1  405.66   32.00 
  -6  16  -1  432.16   42.90 
  -7 -16  -1  834.32   46.60 
   7 -16   1  914.21   39.40 
  -7 -16  -1  949.71   57.79 
   7 -16   1  951.50   43.00 
   7 -16   1  903.81   52.59 
   7  16   1  959.40   45.40 
  -7  16  -1  897.41   59.39 
   7  16   1  925.51   42.50 
   7  16   1  807.22   59.49 
  -7  16  -1  947.81   38.10 
  -7  16  -1 1051.19   52.49 
   8 -16   1  667.63   34.20 
  -8 -16  -1  681.13   36.70 
  -8 -16  -1  619.74   52.29 
  -8 -16  -1  668.03   33.10 
   8 -16   1  800.82   52.89 
  -8  16  -1  672.33   33.00 
  -8  16  -1  751.62   57.89 
   8  16   1  705.53   37.30 
   8  16   1  694.33   59.09 
   8  16   1  661.83   42.20 
  -8  16  -1  776.22   51.69 
  -9 -16  -1   27.30   20.20 
  -9 -16  -1    5.20   34.00 
   9 -16   1   33.10   14.90 
   9 -16   1   63.79   29.30 
  -9  16  -1   12.80   28.40 
  -9  16  -1   36.70   30.90 
   9  16   1   51.39   37.60 
   9  16   1    3.90   21.60 
  10 -16   1  507.05   62.29 
 -10 -16  -1  682.73   64.79 
 -10 -16  -1  380.56   40.90 
  10  16   1  668.33   70.09 
 -10  16  -1  521.95   62.69 
 -10  16  -1  471.95   60.19 
  10  16   1  557.44   44.50 
 -11 -17   1  545.85   65.39 
  11 -17  -1  443.46   42.00 
  11 -17  -1  476.85   58.09 
  11  17  -1  453.35   52.19 
 -11  17   1  440.46   54.79 
  11  17  -1  479.35   59.79 
 -11  17   1  495.75   60.59 
 -10 -17   1  845.62   66.19 
  10 -17  -1  765.72   64.29 
  10 -17  -1  816.62   45.50 
 -10 -17   1  707.83   43.60 
  10  17  -1  801.82   52.89 
 -10  17   1  669.73   67.29 
 -10  17   1  735.03   54.39 
  10  17  -1  740.23   72.79 
  -9 -17   1  405.96   31.80 
   9 -17  -1  521.25   53.19 
   9 -17  -1  458.35   32.30 
   9 -17  -1  548.45   35.90 
   9  17  -1  422.06   42.70 
  -9  17   1  488.05   42.70 
   9  17  -1  438.26   56.69 
  -9  17   1  438.66   36.00 
  -9  17   1  449.76   56.79 
   8 -17  -1   73.89   27.70 
  -8 -17   1  124.09   21.90 
  -8 -17   1   98.29   28.40 
   8 -17  -1  142.89   20.60 
  -8  17   1  159.38   20.90 
  -8  17   1   67.79   22.00 
   8  17  -1   96.79   31.10 
  -8  17   1  112.69   32.60 
   8  17  -1  110.99   24.60 
  -7 -17   1 1050.49   46.60 
   7 -17  -1  968.40   55.79 
   7 -17  -1 1056.99   44.80 
  -7 -17   1  975.90   55.79 
  -7 -17   1  939.01   35.30 
  -7  17   1  976.50   60.09 
  -7  17   1  978.10   59.09 
   7  17  -1  960.20   49.80 
  -7  17   1 1039.70   46.50 
   7  17  -1  930.11   60.49 
  -6 -17   1 1720.13   51.39 
   6 -17  -1 1577.34   69.49 
   6 -17  -1 1686.13   62.49 
  -6 -17   1 1744.73   77.59 
  -6 -17   1 1692.33   63.39 
  -6 -17   1 1673.83   70.69 
  -6  17   1 1749.92   61.59 
   6  17  -1 1669.83   65.69 
  -6  17   1 1759.32   59.09 
  -6  17   1 1657.23   61.09 
   6  17  -1 1645.54   75.49 
  -6  17   1 1594.94   74.29 
  -6  17   1 1606.34   68.09 
   5 -17  -1  575.14   31.90 
  -5 -17   1  586.04   37.30 
  -5 -17   1  563.54   31.40 
  -5 -17   1  640.84   39.70 
   5 -17  -1  605.64   40.10 
  -5  17   1  581.94   30.00 
   5  17  -1  589.64   34.80 
   5  17  -1  618.14   44.70 
  -5  17   1  564.44   42.60 
  -5  17   1  609.94   31.60 
  -5  17   1  589.44   27.10 
  -5  17   1  686.73   37.90 
   5  17  -1  592.74   34.30 
   4 -17  -1  311.87   30.20 
  -4 -17   1  330.77   27.20 
   4 -17  -1  336.77   24.90 
  -4  17   1  302.27   23.00 
   4  17  -1  362.96   28.10 
  -4  17   1  356.96   40.80 
  -4  17   1  314.27   29.50 
   4  17  -1  363.96   25.20 
   4  17  -1  332.37   32.50 
  -3 -17   1 4500.35  139.09 
   3 -17  -1 4389.86  139.79 
   3 -17  -1 4312.37  135.99 
  -3 -17   1 4354.66  138.79 
   3  17  -1 4297.17  139.59 
   3  17  -1 4384.46  138.59 
   3  17  -1 4264.77  137.29 
  -3  17   1 4333.67  139.29 
  -3  17   1 4227.58  132.09 
  -3  17   1 4544.65  139.89 
  -3  17   1 4372.86  131.79 
  -3  17   1 4676.33  136.49 
   2 -17  -1 2681.53   90.19 
   2 -17  -1 2790.92   86.99 
  -2 -17   1 2686.53   91.89 
  -2 -17   1 2819.92   91.79 
  -2  17   1 2795.02   91.29 
   2  17  -1 2793.62   91.69 
   2  17  -1 2865.91   82.09 
  -2  17   1 3083.49   94.19 
   2  17  -1 2818.92   93.39 
  -2  17   1 2684.23   86.19 
   2  17  -1 2714.83   81.99 
  -2  17   1 2795.72   90.29 
   2  17  -1 2763.52   91.39 
  -1 -17   1   40.60   12.30 
   1 -17  -1   42.10   12.10 
  -1 -17   1   41.40   11.50 
   1  17  -1   44.30   11.20 
   1  17  -1   53.89   13.20 
  -1  17   1   22.70   10.30 
  -1  17   1   34.90   14.00 
   1  17  -1   37.50   10.60 
   1  17  -1   40.90   12.80 
  -1  17   1   42.10   12.20 
   0 -17  -1 1071.09   39.40 
   0 -17   1 1029.00   41.00 
   0 -17  -1  998.40   41.70 
   0  17   1 1015.30   40.50 
   0  17   1 1016.40   44.10 
   0  17  -1 1025.20   39.60 
   0  17  -1 1067.19   40.80 
   0  17   1 1027.80   39.00 
   0  17   1 1041.30   36.90 
   0  17  -1 1055.69   41.30 
   0  17  -1  997.50   41.50 
   0  17  -1 1018.60   40.00 
  -1 -17  -1 2444.16   81.29 
   1 -17   1 2357.46   80.99 
  -1 -17  -1 2589.14   83.89 
   1  17   1 2513.05   75.09 
  -1  17  -1 2550.24   82.09 
   1  17   1 2465.25   81.39 
   1  17   1 2432.36   84.49 
  -1  17  -1 2417.96   80.09 
  -1  17  -1 2431.26   81.99 
  -1  17  -1 2509.45   80.09 
   1  17   1 2557.14   81.69 
  -2 -17  -1 2415.76   83.59 
   2 -17   1 2487.35   82.99 
  -2 -17  -1 2475.45   82.79 
   2  17   1 2536.35   82.99 
   2  17   1 2398.46   85.19 
  -2  17  -1 2480.95   79.09 
  -2  17  -1 2419.56   80.69 
  -2  17  -1 2519.05   82.59 
  -2  17  -1 2421.56   80.09 
   2  17   1 2490.55   71.89 
   2  17   1 2388.06   81.39 
  -3 -17  -1    5.50   14.80 
   3 -17   1   13.30   10.50 
   3 -17   1   29.00   13.00 
   3  17   1   21.70   11.30 
   3  17   1   22.70   10.60 
   3  17   1   19.90   17.60 
  -3  17  -1   29.00    8.60 
   3  17   1   32.30   13.00 
  -3  17  -1   12.70   10.50 
  -3  17  -1   21.90   12.30 
  -3  17  -1    9.10    8.70 
   4 -17   1  787.62   40.90 
  -4 -17  -1  797.92   42.10 
   4 -17   1  871.41   35.90 
  -4 -17  -1  823.72   44.20 
  -4  17  -1  822.92   39.20 
   4  17   1  882.81   42.70 
  -4  17  -1  856.81   34.20 
   4  17   1  851.51   38.80 
   4  17   1  804.12   36.80 
   4  17   1  825.42   46.20 
  -4  17  -1  873.41   36.30 
  -4  17  -1  810.12   38.50 
  -4  17  -1  779.62   44.10 
   5 -17   1 1557.64   54.79 
   5 -17   1 1474.45   62.79 
  -5 -17  -1 1502.95   65.59 
  -5 -17  -1 1530.45   47.00 
  -5 -17  -1 1550.54   64.69 
  -5 -17  -1 1461.95   46.60 
   5  17   1 1497.15   67.99 
   5  17   1 1513.65   56.99 
  -5  17  -1 1449.95   67.59 
  -5  17  -1 1543.75   58.69 
  -5  17  -1 1475.55   53.19 
   5  17   1 1517.75   58.19 
  -5  17  -1 1592.24   61.69 
   6 -17   1  980.80   39.80 
  -6 -17  -1  917.91   33.10 
  -6 -17  -1  933.51   32.80 
   6 -17   1  891.81   48.80 
  -6 -17  -1  873.11   52.89 
   6  17   1  982.50   43.70 
  -6  17  -1  841.02   53.09 
  -6  17  -1  872.51   37.80 
  -6  17  -1  902.11   49.50 
   6  17   1  874.71   58.39 
  -6  17  -1  919.11   46.80 
   6  17   1  919.61   45.10 
  -7 -17  -1   44.00   27.80 
  -7 -17  -1   70.29   12.20 
   7 -17   1   42.60   23.30 
   7 -17   1   23.00   13.20 
   7 -17   1   60.19   15.10 
  -7 -17  -1   47.40   11.90 
  -7  17  -1   50.39   30.00 
   7  17   1   58.89   15.50 
  -7  17  -1   84.49   14.00 
  -7  17  -1   87.39   23.10 
   7  17   1   53.99   29.20 
   7  17   1   52.79   19.80 
  -8 -17  -1  504.95   32.30 
   8 -17   1  536.45   31.20 
  -8 -17  -1  492.35   52.39 
   8 -17   1  514.65   48.20 
  -8 -17  -1  420.26   28.80 
  -8  17  -1  596.34   46.80 
  -8  17  -1  476.95   50.49 
  -8  17  -1  511.85   30.40 
   8  17   1  502.85   54.49 
   8  17   1  582.54   41.70 
  -9 -17  -1 1065.79   67.69 
   9 -17   1  969.30   63.69 
  -9 -17  -1  892.51   46.00 
   9 -17   1  973.00   41.80 
  -9  17  -1  952.50   62.09 
  -9  17  -1  884.51   68.29 
   9  17   1  979.30   73.99 
   9  17   1  910.21   51.79 
  10 -17   1  274.37   46.80 
 -10 -17  -1  360.46   46.40 
 -10 -17  -1  205.58   28.00 
  10  17   1  317.87   50.99 
 -10  17  -1  256.37   46.80 
 -10  17  -1  252.07   41.30 
  10  17   1  271.97   32.60 
 -11 -18   1   91.09   41.50 
  11 -18  -1   44.60   24.70 
  11 -18  -1   82.39   45.70 
 -11  18   1  106.09   47.30 
  11  18  -1   68.49   49.60 
  11  18  -1  111.69   49.20 
 -11  18   1   70.59   34.40 
 -10 -18   1   -2.50   19.80 
 -10 -18   1   18.70   33.80 
  10 -18  -1    7.10   31.60 
  10 -18  -1   11.40   20.40 
  10  18  -1   14.60   42.60 
 -10  18   1   12.10   27.60 
 -10  18   1  -31.20   36.80 
  10  18  -1  -28.80   23.00 
   9 -18  -1  200.58   47.10 
  -9 -18   1  185.98   20.50 
  -9 -18   1  250.57   39.10 
   9 -18  -1  171.38   24.10 
   9  18  -1  169.48   39.90 
  -9  18   1  225.38   25.90 
  -9  18   1  161.88   37.60 
  -9  18   1  197.28   29.10 
   9  18  -1  192.38   29.90 
   8 -18  -1  338.77   38.70 
  -8 -18   1  394.46   47.80 
   8 -18  -1  385.36   32.90 
  -8 -18   1  372.96   22.10 
  -8  18   1  381.96   43.60 
  -8  18   1  424.26   32.20 
  -8  18   1  373.96   36.10 
   8  18  -1  328.17   41.30 
   8  18  -1  309.57   37.70 
   7 -18  -1   61.49   23.10 
   7 -18  -1   55.19   18.30 
  -7 -18   1   43.50   23.80 
  -7 -18   1   76.79    9.30 
   7  18  -1   32.60   28.60 
  -7  18   1   63.89   18.80 
  -7  18   1   75.69   28.90 
   7  18  -1  119.39   23.70 
  -7  18   1   89.69   17.80 
  -6 -18   1   -8.00   13.10 
   6 -18  -1   19.30   14.70 
  -6 -18   1   14.70   20.70 
   6 -18  -1   -3.30   19.00 
  -6  18   1   16.90   14.50 
  -6  18   1  -13.80   24.50 
  -6  18   1  -18.10   18.60 
  -6  18   1   -7.30   12.80 
   6  18  -1  -28.70   25.30 
   6  18  -1   10.30   18.70 
  -6  18   1  -10.40   10.00 
  -5 -18   1  289.87   25.00 
  -5 -18   1  310.77   32.40 
   5 -18  -1  333.17   27.30 
  -5 -18   1  284.87   30.20 
   5 -18  -1  316.17   32.30 
  -5  18   1  300.27   32.70 
  -5  18   1  338.07   25.10 
   5  18  -1  362.06   29.80 
   5  18  -1  284.97   29.10 
  -5  18   1  316.57   20.10 
  -5  18   1  292.77   23.40 
  -5  18   1  347.07   31.10 
   5  18  -1  314.67   37.90 
  -4 -18   1  390.76   27.90 
  -4 -18   1  394.36   31.80 
   4 -18  -1  400.56   27.80 
   4 -18  -1  368.46   31.00 
  -4  18   1  400.46   29.40 
  -4  18   1  407.46   23.50 
  -4  18   1  477.95   34.50 
   4  18  -1  413.36   30.40 
   4  18  -1  451.75   30.40 
   4  18  -1  420.66   35.00 
  -4  18   1  468.65   21.90 
  -4  18   1  462.05   25.50 
  -3 -18   1    7.40   12.80 
   3 -18  -1   -0.70   11.90 
  -3 -18   1   22.70   11.60 
   3 -18  -1    1.00   13.60 
   3  18  -1   37.70   15.30 
  -3  18   1   29.90   12.70 
   3  18  -1   -7.20    9.70 
  -3  18   1   30.20   16.00 
  -3  18   1    3.30    9.90 
   3  18  -1    2.50   13.10 
  -2 -18   1  317.47   22.50 
  -2 -18   1  324.97   25.90 
   2 -18  -1  303.17   24.70 
   2  18  -1  339.27   27.30 
  -2  18   1  324.17   22.20 
   2  18  -1  308.97   13.20 
  -2  18   1  315.17   24.00 
  -2  18   1  307.67   25.10 
   2  18  -1  399.16   23.80 
   2  18  -1  364.26   23.70 
   2  18  -1  334.57   25.80 
   2  18  -1  335.77   13.40 
  -1 -18   1  332.67   22.50 
   1 -18  -1  335.37   20.20 
  -1 -18   1  324.47   23.80 
   1 -18  -1  323.97   24.70 
   1  18  -1  363.46   22.90 
   1  18  -1  344.97   25.50 
  -1  18   1  310.07   21.30 
   1  18  -1  359.86   21.70 
  -1  18   1  311.57   25.60 
   1  18  -1  339.37   25.40 
   1  18  -1  321.77   17.10 
  -1  18   1  328.67   18.80 
  -1  18   1  323.27   21.90 
  -1  18   1  316.67   23.30 
   0 -18  -1  482.55   28.60 
   0 -18  -1  488.95   24.80 
   0 -18   1  461.55   26.80 
   0  18  -1  465.75   25.50 
   0  18   1  458.15   30.00 
   0  18  -1  485.15   28.20 
   0  18  -1  458.45   24.60 
   0  18  -1  491.85   27.10 
   0  18   1  449.46   24.50 
   0  18   1  477.25   24.30 
   0  18  -1  472.05   25.10 
   0  18   1  465.25   22.10 
  -1 -18  -1   44.50   12.70 
  -1 -18  -1   61.79   13.40 
   1 -18   1   56.59   12.80 
   1  18   1   70.39   13.20 
  -1  18  -1   64.29   11.30 
   1  18   1   67.69    8.10 
   1  18   1   66.09   11.80 
  -1  18  -1   57.99   11.50 
  -1  18  -1   49.60   12.00 
  -1  18  -1   45.70   13.10 
   1  18   1   68.89   16.40 
  -2 -18  -1  243.98   23.50 
  -2 -18  -1  245.28   21.60 
   2  18   1  261.17   23.50 
   2  18   1  285.67   23.40 
   2  18   1  265.07   10.30 
  -2  18  -1  279.87   21.60 
  -2  18  -1  282.57   19.00 
   2  18   1  256.97   27.00 
   2  18   1  288.07   20.90 
  -2  18  -1  259.27   19.00 
  -3 -18  -1  273.27   26.40 
   3 -18   1  215.68   25.80 
   3 -18   1  301.57   22.50 
  -3 -18  -1  225.88   24.80 
  -3  18  -1  255.67   30.30 
   3  18   1  271.97   21.70 
   3  18   1  267.07   29.70 
  -3  18  -1  279.47   23.20 
  -3  18  -1  245.18   18.20 
   3  18   1  249.28   23.00 
  -3  18  -1  266.37   23.00 
   3  18   1  263.67   28.00 
  -3  18  -1  269.47   18.90 
  -4 -18  -1  357.36   30.50 
  -4 -18  -1  369.76   32.90 
   4 -18   1  365.06   24.90 
   4 -18   1  388.86   29.50 
  -4  18  -1  355.96   22.80 
   4  18   1  369.06   27.90 
  -4  18  -1  366.36   36.70 
   4  18   1  366.86   36.90 
  -4  18  -1  356.26   26.40 
   4  18   1  345.37   24.40 
  -4  18  -1  331.67   23.70 
   4  18   1  352.56   30.40 
  -4  18  -1  373.86   27.50 
  -5 -18  -1   36.40   15.40 
  -5 -18  -1   -1.40   19.40 
   5 -18   1   -7.90   11.90 
   5 -18   1   -2.70   16.70 
   5  18   1   -3.80   15.00 
  -5  18  -1  -10.30   20.50 
  -5  18  -1   14.90   14.60 
  -5  18  -1   -1.00   12.70 
  -5  18  -1    4.00   15.00 
   5  18   1    8.60   23.60 
   5  18   1    0.70   12.90 
   5  18   1   10.40   19.50 
  -5  18  -1   15.30   11.00 
   6 -18   1  417.46   27.40 
  -6 -18  -1  379.46   17.30 
  -6 -18  -1  355.36   17.40 
   6 -18   1  391.86   38.00 
  -6 -18  -1  417.76   43.30 
   6  18   1  373.46   47.20 
  -6  18  -1  352.36   43.70 
  -6  18  -1  355.76   37.30 
   6  18   1  406.46   29.10 
   6  18   1  364.56   33.00 
  -6  18  -1  348.87   32.90 
  -6  18  -1  369.86   24.90 
  -7 -18  -1  364.16   45.90 
   7 -18   1  290.77   34.40 
  -7 -18  -1  293.77   18.70 
   7 -18   1  303.77   26.80 
  -7 -18  -1  258.47   17.70 
  -7  18  -1  237.68   23.90 
   7  18   1  264.37   38.90 
  -7  18  -1  226.78   28.60 
   7  18   1  279.27   32.50 
  -7  18  -1  291.37   39.00 
   7  18   1  210.58   23.70 
  -8 -18  -1   79.09   38.20 
  -8 -18  -1   58.49   14.60 
  -8 -18  -1   48.70   15.90 
   8 -18   1   71.79   16.20 
   8 -18   1   64.29   28.70 
  -8  18  -1   33.40   25.30 
  -8  18  -1   38.20   35.10 
   8  18   1    9.40   21.60 
  -8  18  -1   57.59   15.10 
   8  18   1   98.59   36.80 
  -9 -18  -1  -19.90   16.20 
   9 -18   1  -23.90   26.90 
   9 -18   1   -5.60   15.30 
   9  18   1   17.70   36.50 
  -9  18  -1   -5.10   28.60 
   9  18   1   -3.70   23.30 
  -9  18  -1    7.80   34.40 
  10 -18   1   68.49   37.00 
 -10 -18  -1  126.29   39.60 
 -10  18  -1  145.49   38.50 
  10  18   1  109.79   27.30 
 -10  18  -1  102.39   45.30 
  10  18   1  171.78   47.50 
 -10 -19   1   52.39   33.60 
  10 -19  -1   48.30   22.80 
  10 -19  -1    7.80   36.60 
  10  19  -1   63.89   43.30 
 -10  19   1    9.30   41.00 
 -10  19   1   47.80   28.40 
  10  19  -1   48.40   26.50 
  -9 -19   1   21.90   30.70 
   9 -19  -1    7.10   40.40 
  -9 -19   1   32.80   18.90 
   9 -19  -1   80.39   21.90 
   9  19  -1   40.50   36.60 
   9  19  -1   40.50   25.30 
  -9  19   1   48.90   35.40 
  -9  19   1   72.59   20.30 
  -9  19   1   29.60   23.60 
   8 -19  -1   22.70   26.80 
  -8 -19   1  -22.60   26.90 
  -8 -19   1   18.80    9.00 
   8 -19  -1    8.50   17.30 
  -8  19   1  -11.10   18.80 
  -8  19   1   60.39   28.80 
   8  19  -1  -13.60   22.60 
  -8  19   1   45.10   18.60 
   8  19  -1   -6.60   27.30 
   7 -19  -1  181.38   21.80 
  -7 -19   1  215.08   32.50 
   7 -19  -1  138.49   27.20 
   7  19  -1  154.18   25.60 
  -7  19   1  166.08   32.50 
   7  19  -1  159.18   34.60 
  -7  19   1  190.68   23.40 
  -7  19   1  193.28   22.80 
  -7  19   1  154.78   18.20 
  -6 -19   1  571.44   40.10 
   6 -19  -1  515.05   34.30 
   6 -19  -1  543.95   44.50 
  -6  19   1  527.45   28.00 
  -6  19   1  598.44   47.80 
  -6  19   1  573.04   31.90 
   6  19  -1  490.55   37.50 
  -6  19   1  553.04   36.90 
   6  19  -1  608.94   50.19 
  -5 -19   1  291.97   30.00 
   5 -19  -1  224.38   25.20 
   5 -19  -1  260.17   32.40 
  -5 -19   1  191.38   25.00 
  -5  19   1  249.48   18.80 
  -5  19   1  227.78   30.00 
   5  19  -1  271.97   36.80 
   5  19  -1  237.68   29.40 
  -5  19   1  200.38   22.90 
  -5  19   1  221.58   25.80 
  -5  19   1  236.88   22.00 
   5  19  -1  244.58   28.60 
  -4 -19   1  164.48   19.90 
   4 -19  -1  119.69   20.90 
  -4 -19   1  166.88   23.00 
   4 -19  -1  131.89   17.30 
   4  19  -1  138.99   23.70 
   4  19  -1  160.98   21.80 
  -4  19   1  167.98   20.70 
  -4  19   1  235.28   20.70 
  -4  19   1  161.68   22.80 
  -4  19   1  154.28   18.50 
  -4  19   1  163.18   15.30 
   4  19  -1  241.88   23.40 
  -3 -19   1  570.24   33.90 
   3 -19  -1  572.04   30.90 
  -3 -19   1  587.44   32.20 
   3 -19  -1  566.94   34.60 
   3  19  -1  573.14   33.60 
  -3  19   1  569.24   26.60 
  -3  19   1  526.55   35.70 
  -3  19   1  595.64   25.20 
  -3  19   1  587.34   34.60 
   3  19  -1  566.94   36.60 
   3  19  -1  529.25   33.10 
  -3  19   1  562.64   29.20 
  -2 -19   1  300.77   22.40 
   2 -19  -1  284.77   23.60 
  -2 -19   1  295.67   24.90 
   2 -19  -1  291.77   20.10 
   2  19  -1  258.17   22.20 
   2  19  -1  331.27   24.10 
  -2  19   1  288.07   17.50 
  -2  19   1  256.67   24.00 
   2  19  -1  304.17   12.60 
  -2  19   1  292.97   25.20 
   2  19  -1  281.87   12.30 
   2  19  -1  282.87   26.70 
  -2  19   1  270.87   20.80 
   2  19  -1  290.67   24.80 
   1 -19  -1   43.30   14.20 
  -1 -19   1   38.00   11.40 
  -1 -19   1   41.50   13.40 
   1 -19  -1   39.60   10.80 
   1  19  -1   70.69   15.30 
   1  19  -1   46.10    8.90 
   1  19  -1   64.69   12.30 
  -1  19   1   41.60   10.60 
   1  19  -1   71.49   15.40 
  -1  19   1   67.19   10.20 
  -1  19   1   74.89   13.90 
   1  19  -1   47.90   11.50 
  -1  19   1   46.50   12.10 
  -1  19   1   44.50   15.20 
   0 -19  -1  139.29   18.50 
   0 -19  -1  173.98   18.80 
   0 -19   1  163.18   19.90 
   0  19   1  189.08   16.30 
   0  19   1  214.68   24.30 
   0  19  -1  205.28   21.90 
   0  19   1  161.78   19.80 
   0  19  -1  187.18   17.20 
   0  19   1  193.78   17.30 
   0  19   1  176.98   18.20 
   0  19  -1  159.28   17.20 
   0  19  -1  200.08   21.60 
   0  19  -1  161.68   18.00 
   0  19  -1  184.88   17.50 
   1 -19   1  101.99   15.90 
  -1 -19  -1  102.49   14.90 
  -1 -19  -1   90.99   14.50 
   1  19   1   80.19   16.40 
  -1  19  -1  118.99   14.90 
   1  19   1   87.59   12.60 
  -1  19  -1   60.79   13.10 
   1  19   1   91.59   14.00 
   1  19   1  113.89   11.10 
  -1  19  -1  105.59   16.30 
  -1  19  -1  116.49   13.80 
  -1  19  -1   85.29   12.60 
  -2 -19  -1  175.68   22.90 
   2  19   1  188.08   22.50 
  -2  19  -1  188.88   20.10 
  -2  19  -1  158.58   16.70 
  -2  19  -1  177.58   17.40 
   2  19   1  192.98   20.50 
   2  19   1  181.38   18.70 
   2  19   1  172.68    8.10 
   2  19   1  192.98   21.50 
  -2  19  -1  197.88   22.40 
  -3 -19  -1   39.10   16.40 
   3 -19   1   28.70   12.70 
  -3 -19  -1   43.20   13.40 
   3 -19   1   37.80   16.00 
  -3  19  -1   48.60   13.30 
   3  19   1   30.60   17.10 
   3  19   1   53.69   12.50 
   3  19   1   38.20   13.40 
  -3  19  -1   68.39   19.70 
   3  19   1   62.69   16.10 
  -3  19  -1   46.00   11.10 
  -3  19  -1   48.80   14.00 
  -3  19  -1   49.00   11.00 
   4 -19   1  144.29   21.50 
  -4 -19  -1  101.49   19.60 
   4 -19   1  141.89   17.40 
  -4 -19  -1  124.49   22.50 
  -4  19  -1  132.99   16.40 
   4  19   1  100.29   23.30 
  -4  19  -1  107.39   25.00 
   4  19   1  118.79   16.00 
   4  19   1  127.69   18.90 
  -4  19  -1  131.59   15.00 
   4  19   1  116.99   19.90 
  -4  19  -1  111.99   17.50 
  -5 -19  -1  236.78   29.30 
   5 -19   1  246.48   28.50 
   5 -19   1  207.28   23.80 
  -5  19  -1  247.98   28.30 
  -5  19  -1  209.58   30.70 
  -5  19  -1  188.08   21.80 
  -5  19  -1  277.77   22.20 
  -5  19  -1  238.48   24.20 
   5  19   1  226.48   27.80 
   5  19   1  186.48   30.00 
   5  19   1  241.88   24.80 
  -6 -19  -1   20.80   26.20 
   6 -19   1   25.00   15.00 
  -6 -19  -1   36.70    6.20 
   6 -19   1   30.50   21.30 
  -6  19  -1   29.00   21.00 
  -6  19  -1   33.50   27.10 
  -6  19  -1   43.50   13.50 
  -6  19  -1   39.70   19.30 
   6  19   1   33.00   29.80 
   6  19   1   48.40   16.00 
  -6  19  -1   42.70   14.50 
   6  19   1   24.80   18.10 
   7 -19   1   31.70   23.20 
  -7 -19  -1   42.90    9.10 
  -7 -19  -1   48.00    9.10 
  -7 -19  -1   67.09   29.40 
   7 -19   1   39.30   15.80 
  -7  19  -1   53.19   14.90 
   7  19   1   74.69   31.10 
  -7  19  -1   31.00   31.50 
  -7  19  -1   21.80   21.90 
   7  19   1   40.30   19.90 
   8 -19   1   90.09   17.50 
   8 -19   1   28.70   27.00 
  -8 -19  -1   95.39   13.10 
  -8 -19  -1   59.49   12.50 
  -8 -19  -1   22.90   33.40 
  -8  19  -1   57.29   27.10 
   8  19   1   45.30   22.60 
   8  19   1   95.29   59.39 
  -8  19  -1   65.59   39.50 
  -8  19  -1   65.69   16.50 
   9 -19   1  109.49   19.20 
  -9 -19  -1  103.39   19.30 
  -9 -19  -1  115.29   36.80 
   9  19   1  130.49   28.80 
   9  19   1  143.09   39.00 
  -9  19  -1  125.49   42.10 
  -9  19  -1  172.38   34.60 
 -10 -19  -1  112.89   44.20 
  10 -19   1  105.19   38.40 
 -10  19  -1  194.58   41.20 
 -10  19  -1  111.49   46.10 
  10  19   1  136.39   46.20 
  10  19   1  149.88   31.00 
 -10 -20   1   18.00   35.20 
  10 -20  -1  -14.70   33.60 
  10 -20  -1   11.60   22.40 
  10  20  -1   36.30   29.20 
  10  20  -1   31.70   38.20 
 -10  20   1  -41.20   25.80 
 -10  20   1  -21.00   38.30 
   9 -20  -1  606.14   56.09 
   9 -20  -1  604.04   52.29 
  -9 -20   1  701.53   57.89 
  -9 -20   1  580.64   26.60 
  -9  20   1  528.45   61.79 
  -9  20   1  629.24   47.90 
   9  20  -1  568.04   48.80 
  -9  20   1  730.13   42.40 
   9  20  -1  618.54   66.39 
  -8 -20   1 1831.32   79.19 
   8 -20  -1 1682.43   81.59 
   8 -20  -1 1803.62   68.79 
  -8  20   1 1758.52   74.19 
   8  20  -1 1868.91   75.39 
  -8  20   1 1697.33   69.59 
   8  20  -1 1597.94   87.19 
  -8  20   1 1675.43   85.79 
  -8  20   1 1823.92   68.49 
   7 -20  -1  457.95   45.30 
  -7 -20   1  446.86   45.10 
   7 -20  -1  480.15   34.40 
  -7  20   1  401.06   34.10 
  -7  20   1  395.76   32.70 
  -7  20   1  379.16   27.20 
   7  20  -1  420.36   39.00 
  -7  20   1  419.26   48.90 
   7  20  -1  423.36   51.49 
  -6 -20   1  286.57   33.20 
   6 -20  -1  218.08   29.20 
   6 -20  -1  233.58   28.80 
  -6  20   1  246.98   21.20 
  -6  20   1  264.67   36.10 
   6  20  -1  238.28   36.00 
   6  20  -1  240.28   28.10 
  -6  20   1  228.08   25.20 
  -6  20   1  344.17   29.80 
   5 -20  -1 1309.47   53.19 
  -5 -20   1 1284.37   56.59 
   5 -20  -1 1349.77   60.39 
  -5 -20   1 1315.57   59.79 
   5  20  -1 1227.98   63.09 
  -5  20   1 1335.87   47.80 
  -5  20   1 1304.97   62.69 
  -5  20   1 1293.77   58.39 
   5  20  -1 1338.87   56.69 
  -5  20   1 1358.66   54.89 
  -5  20   1 1291.47   49.60 
   5  20  -1 1346.87   62.79 
   4 -20  -1 1402.46   54.39 
   4 -20  -1 1415.76   59.79 
  -4 -20   1 1307.37   56.49 
  -4 -20   1 1417.46   57.09 
  -4  20   1 1398.76   60.99 
   4  20  -1 1355.96   56.39 
  -4  20   1 1408.86   48.70 
  -4  20   1 1323.37   56.39 
   4  20  -1 1377.26   61.89 
  -4  20   1 1394.66   53.69 
   4  20  -1 1372.56   56.69 
  -4  20   1 1362.46   50.09 
   3 -20  -1  764.22   41.10 
  -3 -20   1  747.23   39.20 
   3 -20  -1  701.23   36.50 
  -3 -20   1  782.82   38.60 
  -3  20   1  716.13   31.80 
  -3  20   1  744.03   34.30 
   3  20  -1  731.13   38.30 
   3  20  -1  792.82   35.30 
  -3  20   1  796.92   40.70 
   3  20  -1  697.93   40.40 
   3  20  -1  695.43   35.60 
  -3  20   1  755.42   30.70 
  -3  20   1  747.93   37.90 
  -2 -20   1  282.87   22.60 
   2 -20  -1  228.58   19.30 
  -2 -20   1  243.38   25.30 
   2 -20  -1  251.67   24.10 
  -2  20   1  198.58   20.20 
   2  20  -1  237.48   26.60 
   2  20  -1  255.87   11.70 
  -2  20   1  265.27   17.70 
   2  20  -1  241.58   11.70 
  -2  20   1  238.38   23.30 
  -2  20   1  252.37   23.80 
   2  20  -1  263.67   22.50 
   2  20  -1  266.87   25.70 
   2  20  -1  277.37   23.80 
  -1 -20   1 2549.34   87.69 
   1 -20  -1 2687.13   84.99 
   1 -20  -1 2571.24   88.09 
  -1 -20   1 2678.73   88.29 
  -1  20   1 2557.84   83.89 
  -1  20   1 2603.24   89.89 
   1  20  -1 2736.53   81.79 
   1  20  -1 2597.14   89.09 
   1  20  -1 2635.54   87.59 
  -1  20   1 2641.04   86.69 
  -1  20   1 2593.44   90.59 
   1  20  -1 2680.13   88.49 
  -1  20   1 2656.33   85.49 
   1  20  -1 2590.44   86.89 
   0 -20   1 1710.13   61.09 
   0 -20  -1 1681.13   61.99 
   0 -20  -1 1708.83   59.39 
   0  20  -1 1693.13   61.79 
   0  20   1 1693.23   60.49 
   0  20   1 1637.84   64.19 
   0  20   1 1697.23   56.39 
   0  20   1 1779.02   63.99 
   0  20  -1 1721.53   60.49 
   0  20  -1 1732.73   63.39 
   0  20  -1 1644.34   61.09 
   0  20   1 1686.73   58.79 
   0  20  -1 1650.73   59.69 
  -1 -20  -1   43.00   13.60 
  -1 -20  -1   43.50   13.40 
   1 -20   1   31.50   13.30 
  -1  20  -1   44.10   12.30 
  -1  20  -1   44.50   12.50 
  -1  20  -1   41.90   11.60 
   1  20   1   45.60    7.70 
  -1  20  -1   42.30   14.70 
   1  20   1   45.60   16.90 
   1  20   1   22.20   11.10 
   1  20   1   39.90   12.80 
  -1  20  -1   52.29   11.90 
  -1  20  -1   53.69   14.90 
  -2 -20  -1  265.17   25.60 
  -2 -20  -1  284.07   24.90 
   2  20   1  255.77   25.00 
  -2  20  -1  304.47   20.60 
  -2  20  -1  309.17   28.60 
   2  20   1  301.67   29.70 
  -2  20  -1  284.57   20.60 
   2  20   1  301.57   23.80 
  -2  20  -1  262.37   22.80 
   2  20   1  278.77   21.90 
  -3 -20  -1 1190.28   51.69 
  -3 -20  -1 1205.38   51.29 
   3 -20   1 1247.18   51.39 
  -3  20  -1 1294.47   50.59 
  -3  20  -1 1159.38   45.30 
  -3  20  -1 1165.28   48.30 
   3  20   1 1258.77   51.59 
  -3  20  -1 1190.98   54.29 
  -3  20  -1 1204.68   46.40 
   3  20   1 1147.89   54.69 
   3  20   1 1162.88   48.80 
   3  20   1 1230.68   48.20 
  -4 -20  -1  352.46   34.10 
   4 -20   1  405.16   28.30 
  -4 -20  -1  385.26   32.30 
   4 -20   1  378.06   30.80 
  -4  20  -1  383.66   24.90 
  -4  20  -1  382.36   37.10 
  -4  20  -1  377.46   29.70 
   4  20   1  376.36   29.60 
   4  20   1  326.07   25.90 
  -4  20  -1  376.16   24.10 
   4  20   1  348.97   32.60 
  -4  20  -1  360.16   28.00 
   4  20   1  363.86   39.10 
  -5 -20  -1  107.39   26.30 
   5 -20   1  103.79   22.20 
   5 -20   1  119.09   17.30 
  -5  20  -1   87.79   19.60 
  -5  20  -1  111.59   16.40 
  -5  20  -1  114.79   30.70 
   5  20   1  100.59   21.90 
   5  20   1  152.28   19.40 
   5  20   1  101.09   29.60 
  -5  20  -1  102.99   28.40 
  -5  20  -1  119.49   21.10 
   6 -20   1  385.96   30.00 
   6 -20   1  385.96   40.00 
  -6 -20  -1  369.46   44.10 
  -6  20  -1  398.86   44.60 
   6  20   1  285.07   37.30 
  -6  20  -1  400.46   26.70 
  -6  20  -1  376.56   30.70 
  -6  20  -1  386.46   35.80 
  -6  20  -1  415.86   46.40 
   6  20   1  421.36   34.30 
   6  20   1  377.36   30.20 
   7 -20   1  810.92   55.39 
  -7 -20  -1  817.42   29.00 
   7 -20   1  838.02   40.90 
  -7 -20  -1  896.71   55.49 
  -7 -20  -1  780.62   28.80 
  -7  20  -1  901.51   40.50 
  -7  20  -1  942.11   50.49 
  -7  20  -1  991.70   45.60 
   7  20   1  845.12   64.29 
  -7  20  -1  824.42   60.99 
   7  20   1  878.91   47.90 
   8 -20   1  698.03   53.79 
  -8 -20  -1  606.84   27.50 
  -8 -20  -1  739.73   60.39 
  -8 -20  -1  638.34   28.10 
   8 -20   1  635.64   37.20 
  -8  20  -1  741.03   36.50 
  -8  20  -1  718.43   52.59 
   8  20   1  667.13   45.80 
  -8  20  -1  652.63   60.29 
   8  20   1  661.63   62.89 
   9 -20   1   40.50   31.30 
   9 -20   1  -14.70   16.60 
  -9 -20  -1   41.70   37.70 
   9  20   1  -49.30   22.40 
  -9  20  -1    4.30   29.80 
  -9  20  -1  -18.80   34.80 
   9  20   1   22.20   38.50 
 -10 -20  -1  547.15   57.79 
  10 -20   1  485.35   57.99 
  10  20   1  418.86   49.30 
 -10  20  -1  475.75   57.79 
 -10  20  -1  479.25   51.19 
  10  20   1  458.35   62.09 
  10 -21  -1  493.75   41.90 
 -10 -21   1  587.34   61.89 
  10 -21  -1  517.35   63.69 
 -10  21   1  388.36   53.89 
  10  21  -1  494.75   61.09 
  10  21  -1  492.65   56.29 
 -10  21   1  391.96   51.09 
   9 -21  -1  219.38   37.40 
   9 -21  -1  187.48   25.50 
  -9 -21   1  221.98   40.50 
  -9  21   1  145.09   24.90 
  -9  21   1  198.38   30.90 
  -9  21   1  131.29   38.60 
   9  21  -1  188.28   43.00 
   9  21  -1  162.18   30.80 
  -9  21   1  198.58   30.80 
   8 -21  -1   13.80   18.90 
   8 -21  -1   19.00   27.80 
  -8 -21   1   24.10   32.50 
   8  21  -1    3.60   23.40 
  -8  21   1   61.49   39.90 
  -8  21   1   -0.70   19.90 
   8  21  -1   13.10   39.50 
  -8  21   1   11.20   16.50 
  -8  21   1   33.60   21.20 
   7 -21  -1  777.02   53.99 
   7 -21  -1  746.53   42.20 
  -7 -21   1  708.23   53.39 
  -7  21   1  775.92   41.50 
   7  21  -1  790.62   48.30 
  -7  21   1  826.02   37.00 
  -7  21   1  734.73   41.20 
   7  21  -1  734.93   59.79 
  -7  21   1  771.62   57.69 
   6 -21  -1  743.63   48.70 
  -6 -21   1  697.93   44.50 
   6 -21  -1  665.93   38.70 
  -6  21   1  725.93   53.39 
  -6  21   1  668.63   38.00 
  -6  21   1  669.93   32.10 
   6  21  -1  665.03   53.19 
   6  21  -1  703.33   43.10 
  -6  21   1  689.13   35.80 
  -5 -21   1  653.43   55.39 
   5 -21  -1  642.44   43.20 
  -5 -21   1  571.74   43.10 
   5 -21  -1  630.54   37.00 
   5  21  -1  697.43   50.79 
  -5  21   1  599.14   32.10 
  -5  21   1  666.83   31.00 
   5  21  -1  664.83   40.90 
  -5  21   1  701.83   41.90 
  -5  21   1  594.04   46.20 
  -5  21   1  610.64   35.80 
   4 -21  -1  438.46   30.90 
  -4 -21   1  434.56   35.40 
  -4 -21   1  505.55   33.00 
   4 -21  -1  428.26   35.80 
  -4  21   1  418.46   27.30 
  -4  21   1  453.25   34.00 
  -4  21   1  428.86   23.00 
   4  21  -1  525.25   32.70 
  -4  21   1  424.86   26.20 
  -4  21   1  443.26   37.30 
   4  21  -1  417.26   38.90 
   4  21  -1  426.06   33.40 
  -3 -21   1 1972.10   72.99 
   3 -21  -1 2037.40   70.49 
   3 -21  -1 1971.60   74.39 
  -3 -21   1 2017.70   72.09 
   3  21  -1 1920.11   71.69 
   3  21  -1 1918.51   74.69 
  -3  21   1 1857.81   72.09 
  -3  21   1 1957.80   73.19 
  -3  21   1 1987.40   73.39 
   3  21  -1 1936.11   71.59 
   3  21  -1 1907.71   69.79 
  -3  21   1 1936.11   65.69 
  -3  21   1 1985.80   64.79 
  -2 -21   1 1278.57   53.99 
   2 -21  -1 1286.57   48.80 
   2 -21  -1 1325.27   52.69 
  -2 -21   1 1301.77   52.59 
   2  21  -1 1375.76   41.90 
  -2  21   1 1296.67   52.99 
   2  21  -1 1302.27   55.59 
  -2  21   1 1407.66   56.49 
  -2  21   1 1420.06   56.49 
   2  21  -1 1354.76   57.39 
   2  21  -1 1333.97   53.99 
  -2  21   1 1382.16   48.10 
   2  21  -1 1393.06   52.69 
   2  21  -1 1322.57   41.70 
   1 -21  -1   -2.00   12.70 
  -1 -21   1   10.30   12.50 
   1 -21  -1   29.00   10.70 
  -1 -21   1   -2.40   10.30 
   1  21  -1   21.10   13.70 
   1  21  -1   -0.30   12.00 
   1  21  -1    8.50    7.50 
  -1  21   1   11.70    9.10 
   1  21  -1   11.10   11.00 
   1  21  -1   14.50   14.10 
  -1  21   1   29.20   11.70 
  -1  21   1   23.40   15.00 
   0 -21   1  542.25   32.00 
   0 -21  -1  574.74   32.20 
   0 -21  -1  613.34   30.10 
   0  21  -1  600.94   29.60 
   0  21   1  572.04   31.00 
   0  21  -1  581.54   30.10 
   0  21   1  544.55   27.70 
   0  21   1  542.85   35.20 
   0  21  -1  615.54   34.10 
   0  21  -1  609.74   32.90 
   0  21  -1  594.14   31.00 
   0  21   1  593.94   26.30 
   0  21  -1  612.44   29.80 
   1 -21   1 1111.09   48.50 
  -1 -21  -1 1189.78   49.60 
  -1 -21  -1 1291.77   49.00 
   1  21   1 1205.38   40.70 
   1  21   1 1268.17   53.79 
   1  21   1 1236.38   48.40 
  -1  21  -1 1251.07   49.00 
  -1  21  -1 1192.98   46.90 
   1  21   1 1208.38   48.10 
  -1  21  -1 1203.38   49.20 
  -1  21  -1 1257.87   50.59 
  -1  21  -1 1162.08   47.70 
  -1  21  -1 1283.27   47.50 
  -2 -21  -1 1687.93   63.69 
  -2 -21  -1 1711.53   64.99 
  -2  21  -1 1718.73   62.49 
  -2  21  -1 1688.23   59.69 
  -2  21  -1 1612.84   63.99 
   2  21   1 1702.23   63.09 
  -2  21  -1 1685.43   65.79 
  -2  21  -1 1699.83   59.59 
   2  21   1 1710.83   61.89 
   2  21   1 1650.23   63.09 
   2  21   1 1677.83   67.89 
  -3 -21  -1   56.79   17.90 
   3 -21   1   69.99   18.30 
  -3 -21  -1   53.79   14.40 
   3  21   1   90.89   14.50 
   3  21   1   67.59   16.10 
  -3  21  -1   47.30   20.00 
  -3  21  -1   65.29   12.60 
  -3  21  -1   61.09   14.10 
   3  21   1   67.09   19.70 
   3  21   1   98.39   17.60 
  -3  21  -1   73.89   13.80 
  -3  21  -1   81.89   15.80 
  -4 -21  -1  741.63   43.20 
   4 -21   1  832.62   44.40 
   4 -21   1  802.52   38.00 
  -4 -21  -1  769.02   45.20 
   4  21   1  803.22   41.00 
   4  21   1  764.42   38.00 
  -4  21  -1  841.92   37.30 
   4  21   1  747.63   43.00 
  -4  21  -1  699.53   40.20 
   4  21   1  736.33   48.00 
  -4  21  -1  796.72   35.30 
  -4  21  -1  830.32   39.80 
  -4  21  -1  792.72   48.00 
  -5 -21  -1 1341.97   62.49 
   5 -21   1 1317.77   52.49 
   5 -21   1 1379.26   59.99 
  -5  21  -1 1348.67   59.69 
  -5  21  -1 1333.67   50.89 
  -5  21  -1 1237.88   54.89 
   5  21   1 1332.57   56.39 
   5  21   1 1226.48   54.29 
   5  21   1 1301.57   65.99 
  -5  21  -1 1216.28   63.69 
  -5  21  -1 1296.57   52.09 
   6 -21   1  533.75   34.50 
  -6 -21  -1  466.55   48.20 
   6 -21   1  575.04   44.90 
  -6  21  -1  587.54   31.80 
   6  21   1  556.44   39.90 
  -6  21  -1  597.54   35.10 
  -6  21  -1  512.75   38.30 
  -6  21  -1  526.35   50.79 
   6  21   1  552.94   55.89 
   7 -21   1   52.69   27.50 
   7 -21   1   83.79   18.50 
  -7 -21  -1   38.70   26.30 
  -7  21  -1   60.89   18.40 
   7  21   1   57.09   21.30 
   7  21   1   38.70   33.90 
  -7  21  -1   70.09   30.10 
  -7  21  -1   76.99   23.00 
  -7  21  -1   12.40   18.70 
  -8 -21  -1  529.95   54.79 
   8 -21   1  462.15   34.60 
   8 -21   1  394.66   49.70 
  -8 -21  -1  435.96   19.00 
  -8  21  -1  474.65   48.10 
   8  21   1  446.16   42.20 
   8  21   1  390.26   49.40 
  -8  21  -1  473.85   53.29 
  -8  21  -1  522.05   32.60 
   9 -21   1  606.04   38.30 
  -9 -21  -1  603.24   63.19 
   9 -21   1  636.44   58.99 
   9  21   1  628.14   67.09 
   9  21   1  691.73   52.39 
  -9  21  -1  745.43   58.29 
  -9  21  -1  702.13   68.59 
  10 -21   1  250.27   41.30 
 -10 -21  -1  240.18   46.70 
 -10  21  -1  260.07   44.30 
  10  21   1  326.07   55.79 
 -10  21  -1  262.77   51.49 
  10  21   1  228.18   34.90 
  10 -22  -1   60.09   24.20 
 -10 -22   1   33.80   38.00 
  10 -22  -1   -1.10   35.40 
 -10  22   1   38.80   43.90 
  10  22  -1  -11.90   29.20 
  10  22  -1  -50.29   40.90 
 -10  22   1  -15.00   28.60 
  -9 -22   1   84.59   38.70 
   9 -22  -1   43.90   35.00 
   9 -22  -1   65.39   22.20 
  -9  22   1   62.79   26.80 
  -9  22   1   69.29   42.70 
   9  22  -1  103.29   29.70 
   9  22  -1   99.19   40.40 
  -8 -22   1  193.38   39.20 
   8 -22  -1  198.58   35.80 
   8 -22  -1  164.78   24.60 
  -8  22   1  169.08   20.50 
   8  22  -1  152.68   28.90 
  -8  22   1  203.48   26.90 
  -8  22   1  173.88   24.10 
  -8  22   1  138.39   46.90 
   8  22  -1  136.39   40.40 
  -7 -22   1   -2.30   22.60 
   7 -22  -1   -7.80   24.50 
   7 -22  -1   -2.10   18.20 
  -7  22   1   10.00   13.80 
  -7  22   1    4.20   16.90 
  -7  22   1   -2.10   17.30 
   7  22  -1   -4.80   20.70 
  -7  22   1   16.50   29.60 
   7  22  -1   46.00   29.30 
   6 -22  -1    3.00   21.90 
   6 -22  -1   16.10   17.60 
  -6 -22   1  -16.80   22.50 
   6  22  -1    4.60   27.60 
  -6  22   1   -7.90   14.30 
  -6  22   1   12.30   15.30 
  -6  22   1  -20.70   10.90 
   6  22  -1  -31.60   19.10 
  -6  22   1   36.70   26.10 
  -5 -22   1    2.80   19.20 
   5 -22  -1   13.90   15.40 
   5 -22  -1    9.60   20.20 
  -5  22   1   -4.20   12.30 
   5  22  -1   21.60   19.30 
  -5  22   1   20.80   15.00 
   5  22  -1    8.00   24.80 
  -5  22   1   12.80   10.00 
  -5  22   1   33.10   25.50 
   4 -22  -1   28.50   18.80 
  -4 -22   1   -2.10   16.30 
   4 -22  -1  -11.90   15.00 
  -4 -22   1    0.40   14.00 
   4  22  -1   13.80   14.80 
  -4  22   1   -1.60   12.30 
  -4  22   1   12.00   19.00 
  -4  22   1   26.50   12.40 
   4  22  -1   31.30   14.90 
  -4  22   1   24.20    9.70 
   4  22  -1    9.60   21.50 
   4  22  -1   46.40   18.30 
  -4  22   1  -16.30   15.20 
  -3 -22   1   -7.60   12.50 
   3 -22  -1   17.80   15.60 
  -3 -22   1   23.30   16.90 
   3  22  -1   18.90   13.20 
   3  22  -1    3.10   12.90 
  -3  22   1   21.80    9.60 
   3  22  -1    9.10   14.90 
  -3  22   1   -5.00   13.00 
  -3  22   1   30.90   12.40 
  -3  22   1   31.70   17.90 
   3  22  -1   35.20   18.60 
  -3  22   1   -4.50   10.80 
  -2 -22   1   28.00   11.80 
   2 -22  -1   20.60   15.10 
  -2 -22   1   21.10   14.70 
   2 -22  -1   12.50   10.80 
  -2  22   1   10.60   15.60 
   2  22  -1   20.20   12.00 
   2  22  -1   20.10   12.10 
  -2  22   1   21.90    9.60 
   2  22  -1   28.60   15.40 
  -2  22   1   -2.70   10.00 
  -2  22   1    4.40   14.20 
  -2  22   1   27.20   16.20 
   2  22  -1   20.70    5.60 
   2  22  -1    6.60    5.20 
   2  22  -1   28.20   17.80 
   1 -22  -1   92.89   17.50 
   1 -22  -1  102.09   14.30 
  -1 -22   1   94.09   16.30 
  -1  22   1   99.09   15.10 
   1  22  -1   74.79   14.20 
  -1  22   1  100.89   17.70 
   1  22  -1   73.49   15.90 
   1  22  -1   70.89   14.10 
   1  22  -1   96.79   18.90 
  -1  22   1   91.29   15.20 
  -1  22   1   85.39   13.00 
  -1  22   1   72.79   18.20 
   1  22  -1   76.49   10.90 
   0 -22   1  287.87   25.90 
   0 -22  -1  297.67   23.30 
   0  22  -1  300.27   25.80 
   0  22  -1  288.57   22.60 
   0  22  -1  294.77   23.50 
   0  22   1  296.57   24.00 
   0  22   1  301.37   29.60 
   0  22   1  262.67   20.80 
   0  22  -1  280.87   22.60 
   0  22  -1  283.97   23.60 
   0  22  -1  297.97   27.10 
   0  22   1  267.77   19.30 
   0  22   1  269.77   23.40 
  -1 -22  -1    5.00   11.40 
  -1 -22  -1   -6.60   13.10 
   1 -22   1    1.70   12.50 
   1  22   1  -10.10   10.70 
  -1  22  -1   -1.20   12.90 
  -1  22  -1   15.40   14.30 
   1  22   1   -1.10   10.50 
  -1  22  -1    1.00   14.20 
  -1  22  -1   -7.20   11.20 
   1  22   1   -5.40    7.00 
   1  22   1    7.30   16.40 
  -1  22  -1    5.60   10.50 
  -1  22  -1   15.50   10.60 
  -2 -22  -1  122.09   19.00 
  -2 -22  -1  117.29   17.40 
   2  22   1  117.69   17.70 
  -2  22  -1  148.39   20.40 
   2  22   1  152.68   23.80 
  -2  22  -1  153.28   16.40 
  -2  22  -1  157.48   22.40 
   2  22   1  122.69   17.20 
  -2  22  -1  135.89   20.00 
   2  22   1  151.38   18.50 
  -2  22  -1  182.68   18.60 
  -3 -22  -1  277.77   29.80 
  -3 -22  -1  243.98   27.60 
   3  22   1  294.47   35.30 
   3  22   1  252.47   23.80 
  -3  22  -1  259.37   22.10 
   3  22   1  296.87   27.30 
  -3  22  -1  234.08   28.20 
  -3  22  -1  273.37   22.20 
   3  22   1  295.07   27.80 
  -3  22  -1  269.17   25.20 
  -3  22  -1  273.47   25.40 
   4 -22   1   48.10   16.20 
  -4 -22  -1   63.19   21.20 
   4 -22   1   37.40   18.90 
   4  22   1   67.09   17.90 
   4  22   1   45.90   17.20 
  -4  22  -1   62.59   16.40 
  -4  22  -1   23.80   22.60 
  -4  22  -1   45.90   16.60 
   4  22   1   24.20   13.80 
  -4  22  -1   27.20   12.20 
   4  22   1   51.69   23.40 
  -4  22  -1   35.20   17.70 
  -5 -22  -1    0.90   20.90 
   5 -22   1    8.10   15.30 
   5 -22   1   14.60   20.10 
   5  22   1   34.20   27.10 
  -5  22  -1   11.10   12.80 
  -5  22  -1   57.79   20.60 
  -5  22  -1  -16.70   12.30 
  -5  22  -1    3.40   17.70 
  -5  22  -1   17.10   25.60 
   5  22   1   -3.10   17.30 
   6 -22   1   32.30   23.70 
   6 -22   1   50.09   17.80 
  -6 -22  -1   66.49   26.50 
   6  22   1   63.99   21.20 
  -6  22  -1   67.99   20.80 
  -6  22  -1   42.40   14.60 
  -6  22  -1   37.80   17.00 
  -6  22  -1   23.30   29.70 
   6  22   1   56.49   31.30 
   7 -22   1   95.09   19.50 
  -7 -22  -1  108.59   33.10 
   7 -22   1   45.10   25.90 
  -7  22  -1   69.69   33.20 
   7  22   1   88.99   36.40 
  -7  22  -1  133.79   19.10 
   7  22   1  110.79   24.30 
  -7  22  -1  119.19   25.60 
  -7  22  -1  122.49   20.90 
  -8 -22  -1   31.80   32.00 
   8 -22   1   70.19   31.50 
   8 -22   1   95.29   19.40 
   8  22   1   55.49   24.40 
   8  22   1  105.29   39.80 
  -8  22  -1   69.09   34.10 
  -8  22  -1   77.59   27.80 
  -8  22  -1  119.79   31.60 
  -9 -22  -1   -4.60   34.40 
   9 -22   1  -11.40   29.50 
   9 -22   1   -6.30   17.90 
   9  22   1   41.50   27.30 
  -9  22  -1   -7.80   34.20 
  -9  22  -1   56.29   31.90 
   9  22   1  -29.70   40.40 
  10 -23  -1  258.27   31.20 
  10 -23  -1  188.78   44.40 
 -10 -23   1  247.68   44.30 
  10  23  -1  234.88   56.09 
 -10  23   1  166.58   50.09 
  10  23  -1  258.87   37.00 
 -10  23   1  239.28   35.30 
   9 -23  -1  148.89   38.00 
  -9 -23   1  226.28   41.60 
   9 -23  -1  229.68   28.00 
   9  23  -1  228.18   44.90 
  -9  23   1  166.88   45.00 
  -9  23   1  195.88   32.90 
  -8 -23   1    6.50   28.10 
   8 -23  -1    2.70   27.60 
   8 -23  -1   24.60   21.60 
  -8  23   1   49.10   34.60 
  -8  23   1   -1.50   20.60 
   8  23  -1    5.70   35.20 
  -8  23   1   23.20   17.60 
   8  23  -1   26.90   25.40 
   7 -23  -1  302.67   34.00 
   7 -23  -1  233.98   34.70 
  -7 -23   1  281.47   36.00 
  -7  23   1  272.37   26.40 
  -7  23   1  305.37   32.20 
   7  23  -1  287.87   44.30 
  -7  23   1  372.76   43.90 
   7  23  -1  321.77   35.20 
  -7  23   1  317.67   31.80 
   6 -23  -1  596.04   39.40 
  -6 -23   1  592.24   44.20 
   6 -23  -1  590.54   47.80 
  -6  23   1  550.44   30.30 
  -6  23   1  601.64   35.10 
  -6  23   1  511.35   36.40 
  -6  23   1  580.14   49.70 
   6  23  -1  577.24   54.49 
   6  23  -1  515.75   42.00 
  -5 -23   1  458.55   39.10 
   5 -23  -1  374.76   39.00 
   5 -23  -1  468.05   35.50 
   5  23  -1  422.56   37.60 
  -5  23   1  395.86   42.10 
  -5  23   1  359.06   24.40 
  -5  23   1  356.46   27.10 
  -5  23   1  398.06   30.00 
   5  23  -1  420.36   46.00 
   4 -23  -1   88.69   21.40 
  -4 -23   1  100.79   22.90 
  -4 -23   1  103.79   20.60 
   4 -23  -1   90.09   19.60 
   4  23  -1  104.49   22.40 
   4  23  -1  123.19   26.80 
  -4  23   1   94.79   25.10 
  -4  23   1  116.99   14.10 
  -4  23   1   77.29   16.60 
   4  23  -1  127.49   32.90 
  -4  23   1   72.79   19.30 
  -4  23   1   95.99   15.40 
   4  23  -1   88.39   19.80 
  -3 -23   1  513.95   36.30 
  -3 -23   1  457.85   31.50 
   3 -23  -1  521.65   33.90 
  -3  23   1  502.85   31.20 
   3  23  -1  523.45   35.50 
  -3  23   1  490.25   35.70 
   3  23  -1  497.45   39.40 
  -3  23   1  502.85   34.70 
   3  23  -1  494.75   33.90 
   3  23  -1  549.25   32.60 
  -3  23   1  494.35   25.80 
  -2 -23   1  911.91   40.80 
   2 -23  -1  802.12   36.80 
   2 -23  -1  786.52   41.60 
  -2 -23   1  786.92   41.10 
   2  23  -1  869.51   28.60 
   2  23  -1  859.41   45.10 
  -2  23   1  813.72   43.60 
   2  23  -1  862.51   42.20 
   2  23  -1  869.71   40.70 
   2  23  -1  873.91   40.90 
  -2  23   1  801.32   38.50 
   2  23  -1  854.01   28.50 
  -2  23   1  823.82   42.70 
  -2  23   1  877.21   41.50 
  -2  23   1  887.91   35.50 
   1 -23  -1  110.79   16.00 
   1 -23  -1   97.89   18.90 
  -1 -23   1  119.89   18.10 
  -1  23   1  104.49   13.80 
  -1  23   1  101.99   15.30 
   1  23  -1  113.59   19.60 
   1  23  -1  104.59   18.40 
   1  23  -1  101.19   11.80 
  -1  23   1   94.79   20.00 
   1  23  -1  158.08   20.50 
   1  23  -1   87.99   16.20 
  -1  23   1  121.49   18.10 
  -1  23   1   84.99   14.30 
   0 -23  -1   49.60   13.80 
   0 -23   1   75.99   17.30 
   0  23   1   75.69   19.10 
   0  23  -1   50.09   17.50 
   0  23  -1   63.09   14.10 
   0  23  -1   51.59   14.30 
   0  23  -1   68.89   14.80 
   0  23   1  116.79   16.40 
   0  23   1   79.09   18.80 
   0  23   1   63.99   13.00 
   0  23  -1   62.59   15.20 
   0  23  -1   55.19   14.30 
   1 -23   1  418.76   29.70 
  -1 -23  -1  475.25   29.90 
   1  23   1  478.75   36.30 
  -1  23  -1  456.75   33.30 
  -1  23  -1  441.56   30.20 
  -1  23  -1  486.35   30.90 
  -1  23  -1  422.66   26.50 
   1  23   1  454.05   31.10 
   1  23   1  481.15   28.40 
   1  23   1  470.75   28.60 
  -1  23  -1  481.95   31.40 
   1  23   1  470.15   21.00 
  -1  23  -1  490.95   27.70 
  -2 -23  -1   75.69   17.20 
  -2 -23  -1   41.40   16.70 
  -2  23  -1   58.09   16.70 
  -2  23  -1   78.89   19.60 
  -2  23  -1   75.79   12.80 
   2  23   1   32.90   12.20 
   2  23   1   80.39   21.60 
  -2  23  -1   51.19   12.60 
  -2  23  -1   46.50   17.40 
   2  23   1   66.89   15.30 
   2  23   1   64.59   18.00 
  -3 -23  -1   27.80   17.20 
  -3 -23  -1   32.70   14.10 
  -3  23  -1   20.10   14.30 
  -3  23  -1   26.50   16.80 
  -3  23  -1   22.60   21.00 
   3  23   1   33.50   16.60 
  -3  23  -1   13.80   12.30 
   3  23   1   37.90   22.20 
   3  23   1   -6.10   15.30 
   3  23   1   36.80   13.10 
  -3  23  -1   16.60   15.00 
  -4 -23  -1  142.09   24.50 
   4 -23   1  139.09   22.40 
   4  23   1  135.29   21.40 
   4  23   1  153.88   20.20 
  -4  23  -1  110.29   25.90 
  -4  23  -1  140.59   18.10 
  -4  23  -1  112.79   21.10 
  -4  23  -1  115.29   19.40 
   4  23   1  149.49   27.90 
   5 -23   1  612.14   43.40 
   5 -23   1  561.84   35.20 
  -5 -23  -1  552.84   46.10 
   5  23   1  592.24   52.69 
   5  23   1  579.74   39.60 
  -5  23  -1  564.24   33.90 
  -5  23  -1  522.65   41.70 
  -5  23  -1  568.44   37.50 
  -5  23  -1  691.03   39.00 
  -5  23  -1  542.65   49.20 
   6 -23   1  310.77   30.80 
   6 -23   1  319.97   39.00 
  -6 -23  -1  314.97   38.00 
   6  23   1  308.87   41.60 
  -6  23  -1  369.86   31.10 
  -6  23  -1  335.47   28.10 
  -6  23  -1  337.27   35.10 
   6  23   1  290.27   34.80 
  -6  23  -1  295.37   38.30 
  -7 -23  -1   39.70   51.49 
   7 -23   1   32.10   18.30 
   7 -23   1   31.40   27.10 
  -7  23  -1   44.40   18.10 
  -7  23  -1   48.10   23.80 
   7  23   1   34.60   24.10 
  -7  23  -1   53.99   35.10 
   8 -23   1   82.89   20.10 
   8 -23   1   96.09   30.80 
  -8 -23  -1  111.29   36.10 
   8  23   1  113.69   41.20 
   8  23   1   80.29   25.80 
  -8  23  -1   94.99   28.40 
  -8  23  -1   67.89   35.00 
   9 -23   1  314.07   45.30 
  -9 -23  -1  339.67   48.40 
  -9  23  -1  295.87   40.20 
  -9  23  -1  245.38   49.30 
   9  23   1  272.67   49.20 
   9  23   1  394.36   46.80 
  10 -24  -1   -7.40   25.00 
 -10 -24   1   65.09   42.40 
  10 -24  -1    7.00   38.60 
  10  24  -1   92.89   51.09 
 -10  24   1   13.70   29.90 
 -10  24   1    6.50   44.60 
  10  24  -1   50.69   32.40 
   9 -24  -1  460.55   57.89 
  -9 -24   1  571.54   59.89 
   9 -24  -1  607.84   45.50 
   9  24  -1  438.56   51.59 
  -9  24   1  497.15   57.09 
  -9  24   1  518.75   47.20 
   9  24  -1  535.35   60.39 
   8 -24  -1  960.50   96.69 
   8 -24  -1 1082.99   54.09 
  -8 -24   1 1080.89   66.19 
   8  24  -1 1111.09   60.89 
  -8  24   1  962.50   70.79 
  -8  24   1  974.20   52.39 
   8  24  -1  849.91   71.99 
  -8  24   1 1041.10   47.00 
  -7 -24   1  392.46   47.60 
   7 -24  -1  376.26   45.30 
   7 -24  -1  328.47   35.70 
  -7  24   1  263.97   26.60 
   7  24  -1  302.77   44.40 
   7  24  -1  316.57   34.60 
  -7  24   1  303.87   32.70 
  -7  24   1  375.06   42.00 
  -7  24   1  337.57   42.00 
  -6 -24   1  381.36   42.40 
   6 -24  -1  348.57   43.20 
   6 -24  -1  385.26   35.40 
  -6  24   1  332.97   33.50 
  -6  24   1  400.66   46.90 
  -6  24   1  446.96   27.20 
   6  24  -1  388.86   40.30 
  -6  24   1  351.06   31.10 
   6  24  -1  389.66   53.29 
   5 -24  -1 1673.13   75.69 
  -5 -24   1 1705.83   73.99 
   5 -24  -1 1688.53   68.09 
  -5  24   1 1664.63   76.19 
   5  24  -1 1779.12   71.39 
  -5  24   1 1732.73   63.09 
  -5  24   1 1767.02   66.89 
  -5  24   1 1798.92   60.49 
   5  24  -1 1678.73   78.49 
  -4 -24   1 1626.14   67.59 
   4 -24  -1 1633.24   63.49 
   4 -24  -1 1544.15   68.29 
  -4  24   1 1654.83   72.99 
  -4  24   1 1596.44   61.29 
   4  24  -1 1539.55   71.39 
  -4  24   1 1642.44   68.69 
   4  24  -1 1480.65   64.69 
  -4  24   1 1522.85   55.99 
  -4  24   1 1500.25   57.19 
   3 -24  -1  109.49   19.60 
  -3 -24   1  140.09   20.50 
  -3 -24   1  125.09   20.90 
  -3  24   1  182.18   25.10 
   3  24  -1  159.28   26.80 
   3  24  -1  103.39   20.80 
  -3  24   1  132.49   18.20 
   3  24  -1  100.59   19.20 
  -3  24   1  131.49   23.40 
   3  24  -1  112.99   19.00 
  -3  24   1  136.79   17.30 
  -2 -24   1  359.56   30.50 
   2 -24  -1  381.96   30.50 
  -2 -24   1  321.87   28.30 
   2 -24  -1  337.67   25.80 
  -2  24   1  368.06   23.20 
  -2  24   1  352.46   28.80 
  -2  24   1  389.66   30.80 
   2  24  -1  346.97   26.60 
   2  24  -1  331.77   15.60 
  -2  24   1  354.16   34.30 
   2  24  -1  355.96   15.60 
   2  24  -1  316.87   28.30 
   2  24  -1  313.37   33.90 
  -2  24   1  317.37   26.70 
   2  24  -1  340.27   30.70 
  -1 -24   1 1476.65   61.09 
   1 -24  -1 1574.64   58.69 
   1 -24  -1 1579.14   62.39 
  -1  24   1 1548.15   60.49 
  -1  24   1 1620.24   58.09 
  -1  24   1 1580.24   65.39 
   1  24  -1 1663.63   53.79 
  -1  24   1 1525.15   58.49 
   1  24  -1 1703.03   61.69 
   1  24  -1 1569.14   60.49 
   1  24  -1 1668.33   64.89 
   1  24  -1 1640.24   62.99 
  -1  24   1 1563.44   64.39 
   0 -24  -1 1714.93   64.49 
   0 -24   1 1818.02   66.59 
   0  24  -1 1751.12   64.69 
   0  24   1 1794.12   63.69 
   0  24   1 1756.72   70.09 
   0  24   1 1817.22   69.49 
   0  24  -1 1772.22   69.29 
   0  24   1 1829.12   62.29 
   0  24  -1 1815.92   63.29 
   0  24  -1 1830.72   65.59 
   0  24  -1 1758.32   66.69 
   0  24  -1 1736.33   66.89 
  -1 -24  -1   27.80   15.00 
   1 -24   1  -12.90   15.00 
   1  24   1    7.00    7.70 
  -1  24  -1   20.80   15.60 
   1  24   1   30.90   19.20 
  -1  24  -1   19.80   16.00 
   1  24   1   14.00   14.80 
   1  24   1   13.30   13.30 
  -1  24  -1   11.40   16.80 
  -1  24  -1    8.80   12.40 
  -1  24  -1   -8.00   12.20 
  -2 -24  -1  689.53   39.80 
  -2 -24  -1  768.42   40.50 
  -2  24  -1  698.53   41.20 
  -2  24  -1  734.23   41.70 
  -2  24  -1  675.63   34.10 
   2  24   1  699.83   40.50 
  -2  24  -1  764.22   38.10 
   2  24   1  700.23   37.40 
  -2  24  -1  733.53   40.00 
   2  24   1  726.73   45.30 
   2  24   1  704.23   38.30 
  -3 -24  -1 1453.05   61.79 
   3  24   1 1353.56   60.39 
   3  24   1 1408.36   58.49 
  -3  24  -1 1475.35   64.79 
  -3  24  -1 1403.66   57.99 
  -3  24  -1 1438.26   60.19 
   3  24   1 1458.65   60.19 
  -3  24  -1 1519.35   59.89 
   3  24   1 1494.25   67.99 
  -3  24  -1 1425.66   55.39 
  -4 -24  -1  964.40   51.59 
   4 -24   1 1004.30   50.99 
  -4  24  -1  960.60   45.80 
  -4  24  -1  953.30   43.10 
  -4  24  -1  958.70   55.19 
   4  24   1  945.91   56.49 
  -4  24  -1  837.02   47.20 
  -4  24  -1  919.91   42.30 
   4  24   1  971.50   48.50 
   5 -24   1   27.20   23.30 
  -5 -24  -1   42.40   24.40 
  -5  24  -1    7.70   17.80 
   5  24   1   18.50   20.30 
  -5  24  -1   61.59   26.00 
  -5  24  -1   16.80   13.90 
  -5  24  -1   65.59   16.60 
   5  24   1   23.90   29.40 
   6 -24   1  433.36   44.40 
   6 -24   1  429.66   33.50 
  -6 -24  -1  426.26   47.00 
   6  24   1  482.45   39.70 
  -6  24  -1  423.66   52.09 
   6  24   1  435.56   48.00 
  -6  24  -1  438.66   31.00 
  -6  24  -1  457.15   38.10 
  -6  24  -1  425.86   33.50 
  -7 -24  -1  899.91   58.99 
   7 -24   1 1098.09   62.29 
   7 -24   1 1016.80   48.00 
  -7  24  -1  979.10   54.79 
  -7  24  -1 1054.89   46.80 
   7  24   1  991.90   71.39 
   7  24   1  945.31   53.99 
  -8 -24  -1  388.46   50.49 
   8 -24   1  410.66   46.20 
   8  24   1  382.96   44.80 
  -8  24  -1  354.26   49.10 
  -8  24  -1  415.66   44.80 
   8  24   1  337.17   48.80 
   9 -24   1   68.79   33.60 
  -9 -24  -1   27.50   37.80 
  -9  24  -1   22.90   31.80 
  -9  24  -1  -24.90   41.00 
   9  24   1   24.30   47.00 
   9 -25  -1   61.09   36.00 
   9 -25  -1   51.49   25.20 
  -9 -25   1   53.19   34.90 
  -9  25   1   75.79   44.10 
   9  25  -1   31.10   42.40 
  -9  25   1   26.30   27.10 
   9  25  -1   43.40   30.70 
   8 -25  -1   90.09   33.80 
   8 -25  -1   72.09   26.30 
  -8 -25   1   71.19   32.40 
  -8  25   1  117.69   24.90 
   8  25  -1   77.59   32.90 
  -8  25   1  106.79   25.20 
  -8  25   1   35.50   35.80 
   8  25  -1   32.00   36.50 
   7 -25  -1  586.34   44.30 
   7 -25  -1  636.74   53.29 
  -7 -25   1  503.15   73.49 
  -7  25   1  572.24   38.60 
  -7  25   1  553.54   56.79 
  -7  25   1  694.43   40.30 
   7  25  -1  574.24   48.10 
   7  25  -1  525.15   60.19 
  -6 -25   1  521.45   47.00 
   6 -25  -1  512.85   38.70 
   6 -25  -1  543.45   48.60 
   6  25  -1  492.35   43.10 
  -6  25   1  499.85   49.20 
  -6  25   1  461.15   34.50 
   6  25  -1  599.54   57.79 
  -6  25   1  528.75   30.70 
  -6  25   1  541.75   46.20 
  -5 -25   1  273.97   34.50 
   5 -25  -1  281.57   32.40 
   5 -25  -1  226.98   31.60 
  -5  25   1  238.48   21.70 
  -5  25   1  217.08   26.80 
   5  25  -1  260.37   37.50 
   5  25  -1  312.37   36.30 
  -5  25   1  305.57   30.70 
  -5  25   1  267.47   36.40 
   4 -25  -1  437.56   41.60 
  -4 -25   1  460.35   39.20 
   4 -25  -1  519.35   36.80 
  -4  25   1  372.86   32.80 
  -4  25   1  478.95   27.10 
  -4  25   1  393.16   41.10 
  -4  25   1  495.75   29.50 
   4  25  -1  491.25   36.20 
   4  25  -1  477.35   43.40 
  -3 -25   1 1215.18   55.59 
  -3 -25   1 1195.78   53.99 
   3 -25  -1 1249.28   54.79 
   3  25  -1 1229.98   59.29 
  -3  25   1 1319.97   47.90 
   3  25  -1 1218.28   54.39 
   3  25  -1 1245.48   55.89 
  -3  25   1 1137.49   54.89 
  -3  25   1 1241.78   56.69 
  -3  25   1 1228.48   51.39 
  -2 -25   1  753.02   39.40 
   2 -25  -1  693.53   40.50 
   2 -25  -1  796.32   36.40 
  -2 -25   1  745.93   41.90 
  -2  25   1  727.93   37.60 
   2  25  -1  758.02   45.10 
   2  25  -1  756.32   26.40 
   2  25  -1  655.83   37.00 
  -2  25   1  739.53   39.90 
  -2  25   1  797.02   34.90 
  -2  25   1  770.12   45.10 
   2  25  -1  776.22   42.50 
   2  25  -1  745.63   39.60 
  -2  25   1  765.92   43.30 
   2  25  -1  759.02   26.40 
   1 -25  -1   57.09   19.80 
   1 -25  -1   87.79   16.40 
  -1 -25   1   61.99   18.40 
   1  25  -1   62.19   11.10 
   1  25  -1   98.19   16.80 
   1  25  -1   65.79   19.70 
   1  25  -1   77.59   15.90 
  -1  25   1   85.19   15.10 
  -1  25   1   55.79   17.90 
  -1  25   1   82.09   16.50 
   1  25  -1   79.69   19.60 
  -1  25   1   69.59   15.50 
  -1  25   1   63.89   20.80 
   0 -25   1  228.48   26.50 
   0 -25  -1  214.48   25.10 
   0  25   1  228.18   22.60 
   0  25   1  235.88   22.20 
   0  25   1  203.78   24.20 
   0  25  -1  262.27   28.50 
   0  25   1  252.67   33.00 
   0  25  -1  229.18   26.20 
   0  25  -1  235.18   24.00 
   0  25  -1  227.98   25.50 
   0  25  -1  198.88   23.50 
   0  25  -1  247.18   22.60 
   1 -25   1  960.90   45.60 
  -1 -25  -1  917.51   44.20 
  -1  25  -1  955.10   44.90 
   1  25   1  916.11   49.30 
   1  25   1  944.01   34.60 
  -1  25  -1  945.21   42.80 
   1  25   1  925.61   43.90 
  -1  25  -1 1001.70   44.80 
  -1  25  -1  957.70   45.20 
  -1  25  -1  958.80   42.20 
  -1  25  -1  916.11   47.20 
   1  25   1  943.61   43.20 
   1  25   1  930.41   45.20 
  -2 -25  -1  617.74   40.10 
  -2 -25  -1  675.93   40.10 
  -2  25  -1  631.44   36.50 
  -2  25  -1  628.54   40.70 
  -2  25  -1  634.04   36.80 
  -2  25  -1  651.13   34.20 
   2  25   1  640.44   45.40 
   2  25   1  743.33   37.40 
  -2  25  -1  625.34   33.90 
   2  25   1  646.44   40.00 
  -2  25  -1  683.43   41.90 
   2  25   1  698.43   41.80 
  -3 -25  -1   26.20   19.70 
   3  25   1   35.10   22.60 
  -3  25  -1   13.50   20.80 
   3  25   1   29.90   19.30 
  -3  25  -1   56.49   17.20 
  -3  25  -1   45.90   14.50 
   3  25   1   50.19   17.30 
  -3  25  -1   44.60   14.50 
  -3  25  -1   30.10   16.70 
   4 -25   1  598.44   42.90 
  -4 -25  -1  560.14   41.90 
  -4  25  -1  642.84   38.70 
  -4  25  -1  576.24   47.60 
  -4  25  -1  637.44   34.60 
   4  25   1  592.74   48.50 
  -4  25  -1  641.34   34.60 
  -4  25  -1  475.75   38.90 
   4  25   1  613.44   39.90 
  -5 -25  -1 1579.64   72.89 
   5 -25   1 1649.13   72.39 
  -5  25  -1 1623.24   77.49 
   5  25   1 1580.14   78.49 
  -5  25  -1 1680.03   62.59 
   5  25   1 1586.34   68.39 
  -5  25  -1 1644.14   66.59 
  -5  25  -1 1573.54   62.59 
   6 -25   1  283.87   33.90 
  -6 -25  -1  257.07   35.30 
  -6  25  -1  278.87   39.30 
  -6  25  -1  325.37   31.00 
  -6  25  -1  259.37   30.00 
  -6  25  -1  274.27   34.60 
   6  25   1  291.87   43.90 
   6  25   1  242.88   31.20 
  -7 -25  -1  -42.20   28.30 
   7 -25   1  -22.30   25.60 
  -7  25  -1  -15.80   33.10 
  -7  25  -1   18.80   23.20 
   7  25   1  -34.20   35.90 
  -7  25  -1    8.00   18.30 
   7  25   1  -23.80   22.50 
  -8 -25  -1  337.97   47.70 
  -8  25  -1  288.57   49.30 
   8  25   1  310.37   50.49 
   8  25   1  264.67   34.60 
  -8  25  -1  371.06   45.50 
   9 -25   1  325.37   45.80 
  -9 -25  -1  309.27   50.39 
  -9  25  -1  282.47   52.09 
  -9  25  -1  310.47   41.00 
   9  25   1  230.78   37.70 
   9  25   1  361.96   57.49 
  -9 -26   1    9.10   36.40 
   9 -26  -1  -11.80   31.50 
   9 -26  -1   10.30   24.40 
   9  26  -1   14.80   41.50 
  -9  26   1  -36.20   37.90 
  -9  26   1  -26.10   26.70 
   9  26  -1   12.80   30.40 
  -8 -26   1  -62.99   30.00 
   8 -26  -1  -49.00   21.40 
   8 -26  -1   35.70   32.00 
  -8  26   1  -30.20   22.70 
   8  26  -1  -10.90   37.00 
  -8  26   1  -59.19   33.80 
   8  26  -1    8.60   26.80 
  -7 -26   1  142.49   32.40 
   7 -26  -1  104.19   23.80 
   7 -26  -1  120.99   31.90 
  -7  26   1  118.89   22.50 
  -7  26   1   68.19   39.80 
   7  26  -1  157.58   30.80 
   7  26  -1   93.99   39.90 
  -6 -26   1   18.30   24.80 
   6 -26  -1   49.50   21.70 
   6 -26  -1  -10.90   25.50 
  -6  26   1   44.30   14.40 
   6  26  -1   22.80   22.40 
   6  26  -1  -10.70   32.30 
  -6  26   1   -8.90   16.30 
  -6  26   1    1.40   30.50 
   5 -26  -1   43.60   24.20 
  -5 -26   1   59.29   24.70 
   5 -26  -1   42.20   20.10 
  -5  26   1   45.60   16.40 
  -5  26   1   21.20   26.60 
   5  26  -1   30.20   22.60 
   5  26  -1   38.30   28.30 
  -5  26   1   54.99   12.80 
  -4 -26   1   48.90   22.70 
   4 -26  -1   41.50   20.30 
  -4  26   1   33.00   17.70 
   4  26  -1   56.29   22.10 
  -4  26   1   38.00   14.80 
  -4  26   1   40.80   24.40 
   4  26  -1   55.09   25.90 
  -4  26   1   58.79   12.90 
   3 -26  -1    7.80   18.30 
  -3 -26   1   18.00   18.70 
   3  26  -1   14.60   17.40 
   3  26  -1   -5.10   21.40 
  -3  26   1  -10.40   19.90 
  -3  26   1   -4.70   20.70 
  -3  26   1   29.00   12.20 
  -3  26   1   18.40   15.60 
  -2 -26   1   57.29   17.50 
   2 -26  -1   74.89   20.60 
  -2 -26   1   35.70   18.50 
   2 -26  -1   61.69   15.70 
  -2  26   1   61.99   13.20 
  -2  26   1   51.89   14.90 
   2  26  -1   88.59   17.90 
   2  26  -1   58.49   19.80 
  -2  26   1   54.99   18.70 
   2  26  -1   62.79    8.30 
   2  26  -1   55.59   23.50 
  -2  26   1   64.29   22.70 
  -2  26   1   61.49   18.70 
   2  26  -1   61.79    8.30 
  -1 -26   1   32.20   16.40 
   1 -26  -1   47.10   15.60 
   1  26  -1   36.80   14.30 
  -1  26   1   27.00   15.10 
   1  26  -1  102.29   17.80 
  -1  26   1   44.40   16.80 
  -1  26   1   75.79   14.30 
   1  26  -1   43.50   18.50 
  -1  26   1   24.20   16.90 
  -1  26   1   58.69   22.90 
   1  26  -1   59.39   20.30 
   1  26  -1   54.99   10.80 
   0 -26  -1   73.89   16.80 
   0 -26   1   77.99   18.10 
   0  26   1   50.99   14.80 
   0  26  -1   74.89   18.10 
   0  26  -1   56.59   13.60 
   0  26  -1   70.29   15.80 
   0  26   1   72.09   19.80 
   0  26  -1   64.89   21.50 
   0  26  -1   59.99   16.30 
   0  26  -1  108.99   20.80 
   0  26   1   50.89   14.10 
   0  26   1   41.90   22.80 
  -1 -26  -1   46.90   18.10 
   1 -26   1   37.20   16.70 
  -1  26  -1   42.80   14.70 
   1  26   1   49.10   21.30 
   1  26   1   35.90    9.80 
  -1  26  -1   27.50   17.60 
  -1  26  -1   19.80   14.20 
  -1  26  -1   38.70   14.80 
  -1  26  -1   38.90   17.40 
   1  26   1   47.50   16.80 
  -1  26  -1   58.99   20.50 
   1  26   1   50.69   15.90 
  -2 -26  -1   -0.20   16.90 
   2  26   1   12.90   17.70 
  -2  26  -1    3.10   19.50 
   2  26   1    0.50   21.50 
  -2  26  -1   -1.50   14.10 
  -2  26  -1   -0.10   19.10 
  -2  26  -1   12.80   15.50 
  -2  26  -1    5.10   15.80 
   2  26   1   15.20   14.70 
  -2  26  -1  -16.20   12.30 
  -3 -26  -1   11.10   19.00 
  -3  26  -1    8.70   13.60 
  -3  26  -1   39.20   18.10 
  -3  26  -1    2.80   17.40 
  -3  26  -1    7.80   21.20 
   3  26   1   51.29   24.20 
  -3  26  -1   47.50   14.00 
  -3  26  -1   14.20   20.40 
   3  26   1   11.10   16.60 
  -4 -26  -1   16.60   22.10 
   4  26   1   20.60   26.50 
  -4  26  -1   36.40   19.10 
  -4  26  -1   25.50   15.80 
   4  26   1   21.40   19.20 
  -4  26  -1  -23.50   29.80 
  -4  26  -1   26.70   15.90 
  -4  26  -1   17.10   25.70 
   5 -26   1    2.50   20.20 
  -5 -26  -1   12.80   25.60 
  -5  26  -1   13.70   19.50 
  -5  26  -1    7.00   16.40 
   5  26   1    0.20   19.50 
  -5  26  -1  -16.30   27.90 
  -5  26  -1   12.20   16.30 
   5  26   1  -19.70   26.80 
  -6 -26  -1    3.50   27.10 
   6 -26   1    3.00   25.40 
  -6  26  -1  -12.40   17.20 
  -6  26  -1  -14.10   17.50 
  -6  26  -1   47.10   21.30 
  -6  26  -1   32.10   31.00 
   6  26   1    6.40   21.80 
   6  26   1   35.80   35.20 
   7 -26   1   14.20   28.00 
  -7 -26  -1   30.50   31.70 
   7  26   1  -20.60   36.10 
  -7  26  -1   45.30   20.60 
   7  26   1   38.20   25.30 
  -7  26  -1   23.90   23.90 
  -7  26  -1   15.80   35.90 
   8 -26   1   -3.10   30.10 
  -8 -26  -1   10.20   32.50 
  -8  26  -1  -23.00   37.70 
  -8  26  -1  -38.40   27.30 
   8  26   1   58.59   41.80 
  -9 -26  -1   -2.20   41.30 
   9 -26   1   -9.30   34.60 
  -9  26  -1  -23.60   31.10 
   9  26   1  -13.90   46.30 
   9  26   1  -49.70   29.40 
  -9  26  -1  -17.00   46.30 
  -9 -27   1  210.48   41.70 
   9 -27  -1  187.48   43.50 
   9 -27  -1  211.48   30.70 
  -9  27   1  164.38   48.80 
   9  27  -1  199.28   49.80 
   9  27  -1  142.29   34.70 
  -9  27   1  190.88   32.40 
   8 -27  -1  111.59   27.00 
  -8 -27   1   68.09   32.70 
   8 -27  -1  117.39   36.10 
  -8  27   1  143.49   44.00 
   8  27  -1  145.99   43.30 
  -8  27   1   91.79   26.50 
   8  27  -1  106.89   30.70 
   7 -27  -1  667.33   47.20 
   7 -27  -1  739.83   68.29 
  -7 -27   1  613.64   53.89 
  -7  27   1  636.44   37.10 
   7  27  -1  611.54   52.09 
  -7  27   1  540.05   64.79 
   7  27  -1  573.44   62.59 
  -7  27   1  637.54   41.00 
  -6 -27   1  524.45   49.40 
   6 -27  -1  475.85   40.40 
   6 -27  -1  565.94   49.30 
  -6  27   1  538.25   35.20 
   6  27  -1  437.26   56.39 
  -6  27   1  568.24   54.79 
   6  27  -1  478.05   45.00 
  -6  27   1  436.76   30.10 
   5 -27  -1   37.50   20.60 
  -5 -27   1    1.80   23.50 
   5 -27  -1   12.20   25.70 
   5  27  -1   29.50   23.40 
   5  27  -1   12.50   26.90 
  -5  27   1    3.20   15.80 
  -5  27   1   20.80   12.70 
  -5  27   1  -10.70   25.40 
  -4 -27   1  287.27   32.40 
   4 -27  -1  247.78   27.60 
  -4  27   1  266.27   31.50 
   4  27  -1  248.58   34.80 
   4  27  -1  301.77   33.20 
  -4  27   1  224.48   26.40 
  -4  27   1  271.47   22.70 
  -3 -27   1 1071.29   53.69 
   3 -27  -1 1069.99   53.29 
  -3  27   1 1122.39   54.99 
   3  27  -1 1103.29   54.49 
  -3  27   1 1116.89   45.10 
  -3  27   1 1067.59   56.79 
   3  27  -1 1141.19   59.69 
  -2 -27   1 1034.20   50.39 
  -2 -27   1  890.61   46.10 
   2 -27  -1 1046.50   50.49 
   2 -27  -1  945.71   43.80 
  -2  27   1  991.10   47.70 
   2  27  -1 1019.80   50.19 
   2  27  -1  978.70   33.30 
   2  27  -1 1062.99   53.29 
  -2  27   1 1004.10   43.20 
   2  27  -1  956.60   33.10 
  -2  27   1 1010.10   53.39 
   2  27  -1  955.00   53.59 
  -1 -27   1  187.18   25.60 
   1 -27  -1  189.88   21.50 
  -1  27   1  205.88   26.00 
   1  27  -1  198.78   25.40 
   1  27  -1  179.88   28.20 
   1  27  -1  217.68   26.30 
   1  27  -1  155.68   17.40 
  -1  27   1  183.78   28.20 
  -1  27   1  180.18   22.40 
   0 -27   1  625.94   37.90 
   0 -27  -1  624.24   37.30 
   0  27  -1  615.14   38.70 
   0  27  -1  645.44   40.40 
   0  27  -1  584.44   33.40 
   0  27  -1  575.64   34.20 
   0  27   1  633.64   32.20 
   0  27  -1  653.73   43.40 
   0  27   1  637.84   35.40 
   0  27   1  643.24   43.70 
   0  27  -1  661.23   41.50 
  -1 -27  -1 1783.32   68.79 
   1 -27   1 1663.03   67.89 
  -1  27  -1 1796.82   66.49 
   1  27   1 1761.02   67.59 
   1  27   1 1787.02   58.19 
   1  27   1 1793.62   70.29 
  -1  27  -1 1766.62   69.39 
  -1  27  -1 1797.82   71.79 
  -1  27  -1 1672.93   66.09 
   1  27   1 1774.62   75.09 
  -1  27  -1 1755.52   67.89 
  -1  27  -1 1808.52   69.49 
  -2 -27  -1  195.18   26.10 
   2  27   1  214.18   26.10 
  -2  27  -1  127.39   18.00 
  -2  27  -1  172.88   26.10 
  -2  27  -1  216.38   27.60 
  -2  27  -1  247.38   25.00 
   2  27   1  196.28   24.60 
  -2  27  -1  154.48   22.80 
   2  27   1  167.78   27.90 
  -2  27  -1  248.38   26.00 
  -3 -27  -1    5.20   18.70 
  -3  27  -1   18.40   15.80 
  -3  27  -1   -0.90   21.60 
  -3  27  -1   11.00   20.10 
  -3  27  -1   -2.40   17.40 
   3  27   1   14.90   18.70 
  -3  27  -1    3.90   19.10 
   3  27   1   -4.40   24.40 
  -3  27  -1    3.80   14.20 
  -4 -27  -1  444.86   41.60 
  -4  27  -1  355.46   31.80 
   4  27   1  460.05   38.40 
  -4  27  -1  419.56   30.90 
  -4  27  -1  437.06   36.10 
   4  27   1  433.96   47.30 
  -4  27  -1  421.56   45.00 
   5 -27   1  752.42   49.90 
  -5 -27  -1  737.13   50.69 
  -5  27  -1  598.54   53.39 
  -5  27  -1  676.73   43.80 
  -5  27  -1  779.82   40.40 
  -5  27  -1  761.02   41.00 
   5  27   1  668.93   57.39 
   5  27   1  683.03   46.20 
   6 -27   1  551.44   48.00 
   6  27   1  520.05   45.00 
  -6  27  -1  516.45   40.90 
   6  27   1  504.85   58.89 
  -6  27  -1  520.75   57.29 
  -6  27  -1  447.76   37.30 
  -7 -27  -1    4.40   29.70 
   7 -27   1   44.60   28.60 
  -7  27  -1   44.50   24.50 
   7  27   1    3.30   24.60 
   7  27   1  -12.30   39.00 
  -7  27  -1    9.70   33.30 
  -7  27  -1   -4.50   21.20 
  -8 -27  -1  490.15   53.89 
   8 -27   1  432.36   53.99 
  -8  27  -1  325.07   50.39 
   8  27   1  363.16   40.40 
   8  27   1  352.46   54.59 
  -8  27  -1  406.56   50.59 
   9 -28  -1  447.26   56.79 
  -9 -28   1  443.96   55.19 
   9 -28  -1  509.85   49.60 
  -9  28   1  405.16   49.60 
  -9  28   1  434.56   59.39 
   9  28  -1  530.65   55.19 
   9  28  -1  381.66   56.99 
   8 -28  -1  794.22   63.29 
   8 -28  -1  730.13   50.59 
  -8 -28   1  786.82   62.49 
  -8  28   1  678.13   49.30 
   8  28  -1  652.43   57.69 
   8  28  -1  676.83   70.99 
  -8  28   1  646.14   69.69 
   7 -28  -1  318.07   34.30 
  -7 -28   1  245.98   38.70 
   7 -28  -1  356.36   46.10 
  -7  28   1  337.67   29.20 
   7  28  -1  252.37   43.50 
  -7  28   1  352.06   48.00 
  -7  28   1  301.97   29.40 
   7  28  -1  205.18   32.30 
   6 -28  -1  128.19   31.60 
   6 -28  -1  179.98   27.60 
  -6 -28   1  156.58   50.29 
  -6  28   1  145.89   34.30 
   6  28  -1  155.08   30.00 
   6  28  -1  164.98   41.30 
  -6  28   1  143.89   22.50 
  -5 -28   1 1690.23   77.29 
   5 -28  -1 1851.01   82.49 
   5 -28  -1 1837.12   75.09 
  -5  28   1 1785.12   80.59 
  -5  28   1 1794.22   66.89 
  -5  28   1 1807.22   65.09 
   5  28  -1 1814.82   76.49 
   5  28  -1 1787.42   85.49 
   4 -28  -1 1316.57   61.89 
  -4 -28   1 1412.46   65.79 
   4  28  -1 1455.95   65.39 
  -4  28   1 1487.75   66.69 
   4  28  -1 1389.36   71.19 
  -4  28   1 1399.86   53.59 
  -4  28   1 1310.57   54.99 
   3 -28  -1   99.49   23.20 
  -3 -28   1  100.59   24.50 
  -3  28   1   76.29   23.90 
  -3  28   1   99.39   25.10 
   3  28  -1  100.09   25.20 
  -3  28   1  116.99   15.80 
   3  28  -1   99.59   28.00 
  -2 -28   1  294.37   35.00 
   2 -28  -1  252.97   27.10 
   2 -28  -1  294.37   32.40 
  -2  28   1  300.47   32.40 
   2  28  -1  288.07   15.60 
  -2  28   1  340.67   26.60 
  -2  28   1  293.77   37.70 
   2  28  -1  288.97   15.20 
   2  28  -1  334.97   35.90 
   2  28  -1  319.07   39.00 
   1 -28  -1 1430.46   56.19 
  -1 -28   1 1448.36   60.89 
   1  28  -1 1332.27   64.09 
  -1  28   1 1274.87   63.09 
   1  28  -1 1355.56   60.49 
   1  28  -1 1344.07   60.39 
   1  28  -1 1367.56   57.29 
  -1  28   1 1436.16   55.89 
  -1  28   1 1305.27   54.49 
   0 -28  -1 1348.86   56.39 
   0 -28   1 1300.67   58.39 
   0  28  -1 1340.07   53.49 
   0  28  -1 1308.07   58.09 
   0  28  -1 1399.76   56.89 
   0  28   1 1357.56   55.19 
   0  28   1 1372.26   51.79 
   0  28  -1 1342.07   62.59 
   0  28   1 1334.57   64.09 
   0  28  -1 1403.76   59.59 
   1 -28   1   40.80   17.60 
  -1 -28  -1   15.30   17.50 
  -1  28  -1   40.60   19.30 
  -1  28  -1   10.80   17.00 
   1  28   1    9.90   16.10 
   1  28   1   47.40   23.60 
  -1  28  -1   33.10   14.60 
   1  28   1   24.00   19.30 
  -1  28  -1   49.30   21.40 
   1  28   1   25.80   10.00 
  -1  28  -1   12.60   18.20 
  -2 -28  -1  588.24   41.20 
  -2  28  -1  556.74   35.20 
   2  28   1  595.44   40.60 
  -2  28  -1  606.24   42.70 
  -2  28  -1  529.65   37.80 
   2  28   1  552.94   45.20 
  -2  28  -1  507.45   38.10 
  -2  28  -1  549.05   42.70 
   2  28   1  571.44   46.50 
  -3 -28  -1 1558.94   66.29 
  -3  28  -1 1496.05   62.59 
  -3  28  -1 1502.65   68.89 
  -3  28  -1 1573.44   68.39 
   3  28   1 1621.34   67.29 
  -3  28  -1 1464.45   63.69 
   3  28   1 1576.74   74.09 
  -3  28  -1 1627.84   60.99 
  -3  28  -1 1520.75   68.79 
  -4 -28  -1 1305.27   64.99 
   4  28   1 1365.36   62.49 
  -4  28  -1 1361.56   59.19 
  -4  28  -1 1387.86   56.49 
   4  28   1 1414.36   71.59 
  -4  28  -1 1300.77   67.29 
  -4  28  -1 1253.27   57.49 
  -5 -28  -1    8.20   23.70 
  -5  28  -1    4.80   18.50 
   5  28   1   -4.10   20.60 
   5  28   1   31.10   32.20 
  -5  28  -1  -11.90   28.60 
  -5  28  -1   32.50   21.00 
  -5  28  -1    9.20   17.40 
  -6 -28  -1  457.85   47.70 
   6 -28   1  531.65   50.89 
   6  28   1  513.85   58.99 
  -6  28  -1  484.45   51.79 
  -6  28  -1  497.25   41.60 
  -6  28  -1  507.45   57.29 
   6  28   1  605.94   48.80 
  -7 -28  -1  706.83   61.59 
   7 -28   1  752.92   59.19 
   7  28   1  675.23   68.79 
  -7  28  -1  815.92   67.69 
   7  28   1  753.92   61.59 
  -7  28  -1  723.63   49.10 
   8 -28   1  240.98   40.60 
  -8 -28  -1  251.97   43.00 
   8  28   1  188.48   35.50 
  -8  28  -1  224.18   37.10 
  -8  28  -1  263.27   52.49 
   8  28   1  198.78   49.80 
  -8 -29   1  130.39   40.30 
   8 -29  -1   57.69   35.10 
   8 -29  -1   56.09   27.50 
  -8  29   1   57.79   26.00 
  -8  29   1   60.99   40.70 
   8  29  -1   -6.60   40.80 
   8  29  -1   69.59   33.20 
   7 -29  -1  228.68   31.10 
  -7 -29   1  236.88   36.80 
   7 -29  -1  238.68   40.20 
   7  29  -1  216.58   45.60 
   7  29  -1  196.88   35.80 
  -7  29   1  247.48   27.30 
  -7  29   1  235.48   45.70 
   6 -29  -1  406.46   49.70 
   6 -29  -1  403.96   42.00 
  -6 -29   1  458.55   48.20 
  -6  29   1  464.85   55.49 
  -6  29   1  425.96   30.40 
  -6  29   1  430.46   35.30 
   5 -29  -1   71.19   24.90 
  -5 -29   1   86.59   28.40 
  -5  29   1   56.09   30.60 
  -5  29   1  102.49   19.80 
   5  29  -1  107.19   34.50 
  -5  29   1  112.89   20.50 
   5  29  -1   69.79   23.80 
   4 -29  -1   12.00   20.80 
  -4 -29   1   67.79   23.40 
  -4  29   1   57.09   15.30 
  -4  29   1   24.80   16.80 
  -4  29   1   21.60   25.70 
   4  29  -1   52.99   26.20 
   4  29  -1   13.60   26.90 
   3 -29  -1  465.15   40.00 
  -3 -29   1  530.05   41.00 
  -3  29   1  537.65   33.70 
  -3  29   1  542.75   46.20 
  -3  29   1  440.76   39.10 
   3  29  -1  480.45   45.00 
   3  29  -1  469.15   42.10 
   2 -29  -1  140.79   20.20 
   2 -29  -1  108.69   23.80 
  -2 -29   1  111.89   23.40 
   2  29  -1  140.99   12.40 
  -2  29   1  135.79   29.00 
   2  29  -1  124.49   27.80 
  -2  29   1  137.99   23.40 
   2  29  -1  128.09   11.70 
   2  29  -1  126.69   24.00 
  -2  29   1  129.79   21.80 
  -1 -29   1   62.29   21.80 
   1 -29  -1   98.59   19.00 
  -1  29   1   89.89   19.40 
  -1  29   1   84.39   23.70 
   1  29  -1   42.90   20.40 
   1  29  -1   50.49   25.20 
  -1  29   1   90.49   18.10 
   0 -29  -1  225.58   24.10 
   0 -29   1  154.58   24.00 
   0  29   1  212.18   26.30 
   0  29  -1  207.38   26.30 
   0  29   1  211.18   24.50 
   0  29  -1  252.87   27.40 
   0  29   1  230.48   27.10 
   0  29  -1  207.28   28.90 
   0  29   1  258.07   33.00 
   0  29  -1  206.98   27.00 
  -1 -29  -1  522.75   37.90 
   1 -29   1  477.45   37.40 
   1  29   1  545.85   36.40 
  -1  29  -1  516.35   38.70 
  -1  29  -1  522.95   37.00 
  -1  29  -1  539.85   34.80 
  -1  29  -1  545.75   42.40 
   1  29   1  482.75   24.50 
   1  29   1  493.45   38.30 
   1  29   1  521.25   45.10 
  -2 -29  -1  209.88   26.80 
  -2  29  -1  236.18   27.30 
  -2  29  -1  236.18   27.80 
   2  29   1  184.48   26.40 
   2  29   1  254.77   35.20 
  -2  29  -1  161.28   27.20 
  -2  29  -1  175.88   27.50 
  -3 -29  -1   11.50   21.90 
  -3  29  -1    7.70   22.90 
  -3  29  -1  -12.70   23.50 
   3  29   1    1.90   25.70 
  -3  29  -1   13.00   15.50 
   3  29   1   14.80   19.50 
  -3  29  -1   28.00   18.30 
  -3  29  -1   -9.80   17.60 
  -4 -29  -1  223.78   32.00 
  -4  29  -1  252.17   28.80 
   4  29   1  267.97   37.40 
   4  29   1  259.47   30.90 
  -4  29  -1  177.88   31.80 
  -4  29  -1  254.07   27.90 
  -5 -29  -1  362.06   39.00 
  -5  29  -1  377.46   42.60 
  -5  29  -1  362.96   38.20 
   5  29   1  339.47   39.70 
   5  29   1  290.37   62.79 
  -6 -29  -1   37.00   28.50 
   6 -29   1   40.90   28.70 
  -6  29  -1   28.80   23.40 
  -6  29  -1   72.69   56.39 
   6  29   1   42.60   36.10 
   6  29   1   75.79   39.50 
  -7 -29  -1    9.50   28.70 
   7 -29   1   54.69   40.10 
  -7  29  -1  -41.20   36.20 
   7  29   1   -3.10   34.40 
   7  29   1   55.49   29.50 
  -7  29  -1    5.60   24.60 
  -8 -29  -1  235.98   47.50 
   8 -29   1  134.79   39.50 
  -8  29  -1  292.47   51.19 
  -8  29  -1  268.27   37.80 
   8  29   1  145.19   34.60 
   8  29   1  163.68   49.10 
  -8 -30   1  117.79   40.20 
   8 -30  -1  -12.60   38.30 
   8 -30  -1   16.30   26.70 
  -8  30   1   40.80   24.70 
  -8  30   1   21.00   42.20 
   8  30  -1   88.49   45.60 
   8  30  -1   -3.50   30.90 
   7 -30  -1  109.39   35.80 
   7 -30  -1   68.09   26.80 
  -7 -30   1   90.69   34.80 
  -7  30   1   84.69   23.90 
   7  30  -1  107.49   44.40 
  -7  30   1   77.09   37.50 
   7  30  -1   28.50   28.30 
   6 -30  -1   17.20   23.20 
  -6 -30   1  -24.10   27.80 
  -6  30   1   -1.80   18.20 
  -6  30   1  -40.80   30.60 
   6  30  -1  -19.00   24.70 
   6  30  -1  -16.70   34.40 
  -6  30   1   34.90   17.40 
   5 -30  -1   24.40   22.50 
  -5 -30   1   76.89   27.60 
  -5  30   1   57.39   16.30 
  -5  30   1   29.00   18.90 
   5  30  -1   11.00   25.20 
   5  30  -1   60.49   33.70 
  -5  30   1   37.90   28.30 
  -4 -30   1   58.89   23.80 
   4 -30  -1   97.09   25.50 
   4  30  -1   48.30   27.30 
  -4  30   1   84.89   28.20 
  -4  30   1  112.49   20.30 
   4  30  -1   35.00   29.50 
  -4  30   1   44.70   28.50 
  -4  30   1   78.49   18.80 
  -3 -30   1   73.09   25.30 
   3 -30  -1   69.79   22.50 
  -3  30   1  118.69   16.60 
   3  30  -1   64.79   23.20 
   3  30  -1   69.49   29.50 
  -3  30   1  113.19   24.30 
  -3  30   1   92.79   27.80 
   2 -30  -1   99.49   20.00 
  -2 -30   1   88.09   23.20 
  -2  30   1  100.79   28.50 
   2  30  -1   96.09   30.40 
   2  30  -1  147.89   12.40 
   2  30  -1   97.29   11.90 
  -2  30   1  130.89   17.60 
   2  30  -1  126.89   27.50 
  -2  30   1   87.19   22.30 
   1 -30  -1   62.59   17.90 
  -1 -30   1   65.39   21.50 
   1  30  -1   25.40   23.90 
  -1  30   1   91.49   26.10 
  -1  30   1   93.59   17.20 
   1  30  -1   98.09   15.40 
   1  30  -1   69.79   24.50 
  -1  30   1   84.39   20.10 
   0 -30  -1  111.39   21.10 
   0 -30   1   96.49   20.80 
   0  30  -1  113.79   19.20 
   0  30   1   85.79   27.10 
   0  30  -1  104.29   27.50 
   0  30   1   67.39   21.90 
   0  30   1   99.69   17.10 
   0  30   1  124.69   20.10 
   0  30  -1  106.49   23.70 
   1 -30   1   31.40   18.70 
  -1 -30  -1   -2.60   19.10 
  -1  30  -1   18.10   22.10 
  -1  30  -1   44.30   17.00 
   1  30   1    6.30   18.90 
   1  30   1   26.30   10.50 
   1  30   1   26.30   19.60 
   1  30   1    2.40   22.80 
  -1  30  -1   33.90   20.60 
  -1  30  -1   -9.90   18.00 
  -2 -30  -1   17.60   20.00 
   2  30   1   14.40   25.80 
  -2  30  -1  -19.10   15.70 
  -2  30  -1   21.50   21.10 
  -2  30  -1   -3.20   20.60 
   2  30   1   -8.80   18.70 
  -2  30  -1    9.90   22.90 
  -3 -30  -1  198.08   30.20 
   3  30   1  175.88   32.50 
  -3  30  -1  204.48   26.40 
  -3  30  -1  196.98   32.60 
   3  30   1  200.48   29.80 
  -3  30  -1  232.88   29.30 
  -3  30  -1  173.98   25.30 
  -3  30  -1  218.18   32.00 
  -4 -30  -1  108.69   26.20 
  -4  30  -1   84.29   27.60 
   4  30   1   85.49   30.10 
  -4  30  -1   76.69   22.00 
  -4  30  -1  142.59   23.70 
   4  30   1  113.99   27.00 
  -4  30  -1  131.69   23.90 
  -4  30  -1   43.50   27.50 
  -5 -30  -1    8.80   33.80 
   5  30   1   -7.80   32.90 
  -5  30  -1   26.70   21.20 
   5  30   1    8.80   24.20 
  -5  30  -1   25.30   31.50 
   6 -30   1   29.10   26.80 
  -6 -30  -1   12.80   32.20 
   6  30   1   39.10   27.10 
  -6  30  -1   30.10   23.50 
   6  30   1   30.10   37.70 
  -6  30  -1   13.20   37.20 
   7 -30   1  100.49   32.00 
  -7 -30  -1   53.79   37.60 
   7  30   1   60.69   43.00 
  -7  30  -1   55.69   41.80 
  -7  30  -1   51.99   29.90 
   7  30   1   70.29   30.30 
  -8 -30  -1   37.50   36.90 
   8 -30   1   -6.00   39.10 
  -8  30  -1   79.69   33.20 
  -8  30  -1   41.50   48.30 
   8  30   1   50.29   33.00 
   8  30   1   24.30   47.10 
   8 -31  -1  112.89   31.00 
   8 -31  -1   80.39   40.00 
  -8 -31   1   89.89   38.40 
  -8  31   1   95.49   26.80 
  -8  31   1   87.79   44.80 
   8  31  -1  101.79   38.10 
   8  31  -1   48.10   46.70 
   7 -31  -1  572.54   59.39 
   7 -31  -1  663.53   50.89 
  -7 -31   1  743.23   64.09 
  -7  31   1  722.83   45.80 
   7  31  -1  613.64   56.39 
  -7  31   1  665.33   67.19 
   7  31  -1  624.54   68.89 
  -6 -31   1  865.51   61.99 
   6 -31  -1  816.82   53.59 
   6  31  -1  808.32   55.89 
  -6  31   1  728.03   50.79 
  -6  31   1  812.02   46.00 
   6  31  -1  825.02   69.89 
   5 -31  -1   43.30   25.10 
  -5  31   1  111.79   19.50 
  -5  31   1   60.89   31.10 
   5  31  -1  105.79   33.30 
   5  31  -1   64.49   38.00 
  -5  31   1   75.69   20.20 
   4 -31  -1  128.29   27.60 
  -4 -31   1  126.59   30.40 
  -4  31   1  125.79   30.10 
  -4  31   1  184.48   34.40 
  -4  31   1  168.48   20.90 
   4  31  -1   98.19   29.20 
   4  31  -1  156.58   36.00 
  -4  31   1  166.08   22.90 
   3 -31  -1  760.92   49.00 
  -3 -31   1  765.22   49.10 
  -3  31   1  766.42   53.39 
  -3  31   1  828.32   49.30 
   3  31  -1  682.03   55.39 
   3  31  -1  763.52   50.39 
  -3  31   1  800.62   39.60 
   2 -31  -1  894.81   46.30 
  -2 -31   1  884.81   50.99 
  -2  31   1  857.11   55.49 
   2  31  -1  935.91   58.09 
   2  31  -1  894.51   31.00 
   2  31  -1  933.01   53.39 
   2  31  -1  916.21   31.20 
  -2  31   1  817.72   47.70 
  -2  31   1  993.70   43.70 
   1 -31  -1   69.89   20.60 
  -1 -31   1   84.79   24.40 
   1  31  -1   53.29   25.50 
   1  31  -1   56.99   24.70 
   1  31  -1   62.89   15.40 
  -1  31   1   56.69   26.80 
  -1  31   1   47.50   19.50 
  -1  31   1   83.99   17.90 
   1  31  -1   74.59   13.80 
   0 -31  -1  454.45   37.50 
   0 -31   1  385.36   36.50 
   0  31   1  383.96   29.10 
   0  31  -1  365.36   38.60 
   0  31   1  307.97   32.10 
   0  31  -1  378.26   31.10 
   0  31   1  405.56   37.70 
   0  31   1  416.16   43.80 
   0  31  -1  430.26   44.60 
   1 -31   1 1474.95   63.69 
  -1 -31  -1 1519.05   64.39 
  -1  31  -1 1499.55   69.19 
   1  31   1 1440.36   65.69 
   1  31   1 1443.36   71.29 
   1  31   1 1395.76   49.60 
  -1  31  -1 1446.76   64.39 
  -1  31  -1 1412.46   60.69 
  -2 -31  -1  455.25   39.00 
  -2  31  -1  436.86   42.20 
   2  31   1  362.96   39.80 
  -2  31  -1  407.06   38.10 
   2  31   1  390.26   46.60 
  -2  31  -1  368.16   39.70 
  -3 -31  -1   11.60   22.30 
   3  31   1   11.70   23.10 
   3  31   1   -9.50   26.40 
  -3  31  -1   -3.00   22.30 
  -3  31  -1    7.90   19.40 
  -3  31  -1   12.60   24.10 
  -3  31  -1   11.20   19.10 
  -4 -31  -1  407.66   43.90 
   4  31   1  294.57   34.50 
  -4  31  -1  298.77   31.50 
  -4  31  -1  311.47   39.20 
   4  31   1  221.08   47.10 
  -4  31  -1  287.57   30.40 
  -4  31  -1  284.17   36.10 
  -5 -31  -1  580.84   51.99 
   5  31   1  547.25   60.39 
   5  31   1  420.96   46.90 
  -5  31  -1  544.75   42.50 
  -5  31  -1  505.55   56.79 
  -5  31  -1  577.34   41.80 
  -6 -31  -1  352.76   41.50 
   6  31   1  388.76   54.99 
  -6  31  -1  308.37   34.90 
   6  31   1  359.36   39.20 
  -6  31  -1  259.87   43.40 
  -7 -31  -1   -1.80   34.40 
   7 -31   1   -4.80   32.00 
  -7  31  -1   15.50   28.40 
   7  31   1   32.90   31.80 
   7  31   1   65.89   45.00 
  -7  31  -1   68.79   42.00 
  -8 -32   1  452.85   55.39 
   8 -32  -1  498.95   65.09 
   8 -32  -1  519.75   67.49 
   8  32  -1  460.55   57.49 
  -8  32   1  557.74   64.79 
   8  32  -1  428.66   60.79 
  -8  32   1  512.45   47.00 
   7 -32  -1  465.55   58.39 
  -7 -32   1  318.77   46.20 
   7 -32  -1  310.27   38.20 
   7  32  -1  276.67   41.60 
  -7  32   1  391.26   39.30 
   7  32  -1  313.57   54.09 
  -7  32   1  378.46   51.29 
  -6 -32   1   25.00   29.90 
   6 -32  -1   29.50   26.20 
  -6  32   1   17.00   20.00 
   6  32  -1   16.50   38.20 
   6  32  -1   18.70   27.80 
  -6  32   1   81.59   37.40 
   5 -32  -1  842.52   55.09 
  -5 -32   1 1023.50   59.19 
   5  32  -1  968.30   59.69 
   5  32  -1  865.71   66.49 
  -5  32   1  939.41   44.90 
  -5  32   1  828.82   62.59 
  -5  32   1  903.61   47.70 
   4 -32  -1  841.12   51.79 
  -4 -32   1  727.03   54.19 
   4  32  -1  855.71   63.19 
  -4  32   1  844.52   58.79 
  -4  32   1  781.82   53.89 
  -4  32   1  912.51   42.10 
  -4  32   1  801.62   44.20 
  -3 -32   1  163.98   30.20 
  -3  32   1   97.69   25.80 
   3  32  -1  106.49   31.90 
   3  32  -1  132.99   28.90 
  -3  32   1  126.19   30.60 
  -3  32   1  162.08   21.40 
  -2 -32   1  352.96   40.00 
   2 -32  -1  357.96   34.70 
   2  32  -1  378.86   17.30 
   2  32  -1  343.17   40.90 
   2  32  -1  388.66   42.00 
  -2  32   1  338.87   37.60 
  -2  32   1  384.46   43.50 
  -2  32   1  458.05   32.30 
   2  32  -1  371.76   17.40 
   1 -32  -1 1091.09   50.09 
  -1 -32   1 1027.80   54.19 
  -1  32   1 1033.50   60.49 
  -1  32   1  961.90   46.80 
   1  32  -1 1027.30   60.29 
   1  32  -1  955.30   41.40 
   1  32  -1 1056.59   56.89 
  -1  32   1 1006.20   48.50 
   1  32  -1  965.90   40.00 
   0 -32   1  930.91   50.69 
   0 -32  -1  878.91   48.80 
   0  32  -1  831.72   43.20 
   0  32   1  888.01   57.29 
   0  32   1  889.61   42.00 
   0  32  -1  959.80   55.89 
   0  32  -1  958.10   52.09 
   0  32   1  885.01   51.39 
   0  32   1  915.11   60.89 
  -1 -32  -1   76.79   23.20 
   1 -32   1   95.59   24.40 
   1  32   1   42.40   26.80 
   1  32   1   97.79   25.40 
  -1  32  -1   53.69   23.30 
  -1  32  -1   81.29   21.70 
   1  32   1   64.89   12.00 
  -1  32  -1   68.79   26.70 
  -2 -32  -1  131.19   26.60 
  -2  32  -1  115.49   27.00 
   2  32   1  147.59   32.70 
  -2  32  -1  172.58   29.50 
  -2  32  -1  177.28   28.70 
   2  32   1  159.58   28.00 
  -3 -32  -1  619.24   48.60 
   3  32   1  682.53   58.59 
  -3  32  -1  638.64   51.69 
  -3  32  -1  678.73   44.50 
  -3  32  -1  675.83   46.20 
   3  32   1  634.44   48.40 
  -3  32  -1  608.04   51.19 
  -4 -32  -1  445.16   47.90 
   4  32   1  502.95   58.49 
   4  32   1  435.26   52.49 
  -4  32  -1  501.25   51.09 
  -4  32  -1  577.14   53.29 
  -4  32  -1  431.76   42.20 
  -4  32  -1  482.05   40.90 
  -5 -32  -1    5.90   27.30 
  -5  32  -1   35.70   34.40 
   5  32   1    0.20   35.80 
  -5  32  -1   22.90   21.80 
   5  32   1    2.90   26.40 
  -5  32  -1   39.30   22.70 
  -6 -32  -1  617.04   57.59 
  -6  32  -1  574.94   46.00 
  -6  32  -1  533.35   47.30 
  -6  32  -1  507.85   61.89 
   6  32   1  609.64   55.49 
   6  32   1  569.44   70.59 
   7 -32   1  435.96   50.19 
  -7 -32  -1  657.83   62.49 
   7  32   1  482.55   64.59 
  -7  32  -1  537.95   59.99 
  -7  32  -1  405.06   49.60 
   7  32   1  420.56   46.90 
  -7  32  -1  548.15   45.60 
  -7 -33   1  190.58   42.90 
  -7  33   1  200.08   29.00 
   7  33  -1  114.49   47.90 
   7  33  -1  143.99   35.80 
  -7  33   1  186.58   45.60 
   6 -33  -1  138.49   31.30 
  -6 -33   1  195.48   37.00 
  -6  33   1  158.18   26.20 
  -6  33   1  221.28   44.30 
   6  33  -1  100.39   41.00 
   6  33  -1  134.69   35.10 
   5 -33  -1   42.60   25.10 
  -5 -33   1   -0.80   25.80 
   5  33  -1   10.80   25.60 
  -5  33   1   -5.10   29.10 
   5  33  -1   22.10   36.30 
  -5  33   1   66.09   35.00 
  -5  33   1   53.19   21.70 
   4 -33  -1   65.19   27.10 
   4  33  -1   45.20   28.60 
  -4  33   1   78.39   28.70 
   4  33  -1   79.19   41.00 
  -4  33   1   79.29   20.50 
  -4  33   1    7.70   30.10 
  -4  33   1   32.90   19.30 
  -3 -33   1   42.30   26.40 
  -3  33   1   61.59   18.40 
   3  33  -1   33.00   28.70 
  -3  33   1   66.59   32.20 
  -3  33   1   58.69   25.80 
  -2 -33   1   38.20   24.50 
   2 -33  -1   72.99   21.10 
  -2  33   1   -2.20   21.60 
  -2  33   1   80.79   18.40 
   2  33  -1   29.80   28.40 
  -2  33   1   43.80   27.40 
   2  33  -1   42.00    8.20 
   2  33  -1   85.79   28.80 
   1 -33  -1  102.69   23.40 
  -1 -33   1   50.19   24.30 
   1  33  -1   90.19   16.40 
  -1  33   1   61.59   24.70 
  -1  33   1   71.89   21.60 
  -1  33   1   79.59   18.40 
   1  33  -1   68.79   13.80 
  -1  33   1  109.89   31.30 
   1  33  -1   82.69   28.30 
   1  33  -1   92.39   25.50 
   0 -33   1  100.49   25.50 
   0 -33  -1  117.49   24.00 
   0  33   1   91.49   28.90 
   0  33   1  106.29   20.00 
   0  33  -1  115.09   20.00 
   0  33   1   98.79   25.00 
   0  33  -1  184.78   28.60 
   0  33  -1  108.69   29.80 
  -1 -33  -1  260.47   30.70 
   1 -33   1  275.17   31.20 
   1  33   1  213.18   19.00 
   1  33   1  187.38   28.30 
  -1  33  -1  243.08   27.80 
  -1  33  -1  253.07   32.30 
   1  33   1  167.78   33.70 
  -1  33  -1  227.08   34.30 
  -2 -33  -1  202.78   28.60 
   2  33   1  152.78   30.10 
   2  33   1  131.69   33.40 
  -2  33  -1  109.79   27.30 
  -2  33  -1  170.88   29.10 
  -2  33  -1  157.48   26.80 
  -3 -33  -1   35.00   23.60 
  -3  33  -1  -18.20   23.80 
  -3  33  -1    9.10   20.60 
   3  33   1   11.30   28.00 
  -3  33  -1    6.70   25.50 
  -3  33  -1   26.90   22.50 
   4  33   1   29.50   32.40 
   4  33   1   46.60   26.80 
  -4  33  -1   19.40   22.30 
  -4  33  -1   -6.50   30.60 
  -4  33  -1   79.59   31.20 
  -4  33  -1   52.29   23.40 
  -5 -33  -1  140.39   33.40 
   5  33   1   55.59   28.80 
  -5  33  -1   92.19   26.30 
  -5  33  -1   62.59   30.30 
  -5  33  -1   57.59   25.10 
   5  33   1   64.09   37.20 
  -6 -33  -1   39.80   33.20 
  -6  33  -1   -8.40   37.10 
   6  33   1   43.80   32.60 
  -6  33  -1   36.10   26.30 
  -6  33  -1   38.90   24.60 
   6  33   1  -29.80   40.80 
  -7 -33  -1    6.50   34.60 
   7  33   1  -62.79   29.70 
  -7  33  -1  -48.60   28.30 
   7  33   1   14.50   45.40 
  -7  33  -1   42.20   44.20 
  -7  33  -1   14.30   25.20 
  -7 -34   1   25.90   34.50 
   7 -34  -1  -13.70   29.30 
  -7  34   1   60.99   43.60 
   7  34  -1    6.50   33.80 
  -7  34   1   28.20   25.30 
   7  34  -1    8.20   46.90 
  -6 -34   1   34.30   29.90 
   6 -34  -1   17.00   44.60 
  -6  34   1   31.60   35.10 
   6  34  -1   17.80   31.30 
   6  34  -1   21.90   41.90 
  -6  34   1    1.20   23.20 
   5 -34  -1  106.19   33.40 
  -5 -34   1  131.79   32.50 
   5  34  -1   95.59   41.80 
  -5  34   1   83.69   24.00 
  -5  34   1  199.98   37.90 
  -5  34   1  147.59   38.30 
   5  34  -1  117.59   32.90 
  -4 -34   1  274.27   36.80 
   4  34  -1  280.67   44.00 
  -4  34   1  255.67   28.00 
  -4  34   1  342.27   31.70 
  -4  34   1  287.27   37.80 
  -4  34   1  253.97   45.30 
   4  34  -1  254.87   38.10 
  -3 -34   1   45.10   26.40 
  -3  34   1   37.80   18.20 
   3  34  -1   41.70   31.50 
   3  34  -1   -9.00   25.70 
  -3  34   1   44.30   30.00 
  -3  34   1  -17.30   25.30 
  -2 -34   1  -25.20   24.10 
   2 -34  -1   19.80   19.20 
  -2  34   1   -1.00   22.60 
  -2  34   1    1.40   25.20 
   2  34  -1   29.40   29.50 
  -2  34   1   73.69   20.30 
   1 -34  -1  239.48   28.20 
  -1 -34   1  290.37   35.70 
  -1  34   1  224.78   35.00 
   1  34  -1  220.08   22.90 
   1  34  -1  215.18   32.40 
   1  34  -1  210.28   35.70 
  -1  34   1  228.98   29.00 
  -1  34   1  293.87   28.40 
   1  34  -1  199.98   25.20 
   0 -34  -1  156.88   25.90 
   0 -34   1  111.49   26.10 
   0  34  -1  160.08   31.50 
   0  34   1  151.58   27.20 
   0  34  -1  142.09   21.70 
   0  34  -1  104.29   27.80 
   0  34   1  229.78   28.30 
   0  34   1  131.19   33.60 
  -1 -34  -1   -7.30   21.40 
   1 -34   1   37.10   23.30 
   1  34   1   16.90   11.50 
  -1  34  -1   27.80   27.70 
  -1  34  -1    5.00   22.90 
   1  34   1    5.00   28.10 
  -1  34  -1   -3.20   20.80 
  -2 -34  -1  172.28   29.90 
  -2  34  -1  198.88   30.00 
  -2  34  -1  189.88   32.50 
  -2  34  -1  227.98   32.40 
   2  34   1  217.58   32.40 
  -3 -34  -1  241.38   34.20 
  -3  34  -1  228.98   30.70 
  -3  34  -1  203.28   37.40 
  -3  34  -1  246.78   32.60 
   3  34   1  195.18   37.80 
   3  34   1  214.28   31.90 
  -3  34  -1  166.38   32.00 
  -4 -34  -1   94.89   30.90 
   4  34   1   52.79   26.70 
  -4  34  -1   34.30   22.90 
  -4  34  -1   99.59   26.50 
  -4  34  -1   56.69   30.70 
  -4  34  -1   59.19   31.20 
   4  34   1   34.40   35.90 
  -5 -34  -1   -9.30   28.40 
   5  34   1   81.69   32.30 
  -5  34  -1  -13.10   35.70 
  -5  34  -1   40.80   24.10 
  -5  34  -1   50.79   26.00 
  -5  34  -1  -12.20   34.80 
   5  34   1  -20.50   36.30 
  -6 -34  -1  122.19   37.30 
  -6  34  -1   91.09   30.20 
   6  34   1   99.09   36.30 
   6  34   1   86.39   49.00 
  -6  34  -1   81.39   42.20 
  -6  34  -1   89.89   26.80 
  -6 -35   1  766.42   64.59 
  -6  35   1  766.72   65.79 
   6  35  -1  654.23   75.99 
   6  35  -1  674.43   60.79 
  -6  35   1  609.34   46.80 
  -5 -35   1  174.48   37.30 
  -5  35   1  199.98   28.10 
  -5  35   1  236.98   40.60 
   5  35  -1  196.08   38.10 
  -5  35   1  251.67   39.30 
   5  35  -1  230.48   47.50 
  -4 -35   1  267.77   36.50 
   4  35  -1  312.17   46.00 
  -4  35   1  324.87   37.20 
  -4  35   1  302.67   39.00 
  -4  35   1  448.36   39.70 
   4  35  -1  423.56   48.10 
  -4  35   1  249.97   40.00 
  -3  35   1 1017.30   58.29 
  -3  35   1  906.11   73.29 
   3  35  -1 1133.99   63.69 
  -3  35   1 1110.99   52.09 
   2 -35  -1  879.71   47.30 
  -2 -35   1  823.72   55.89 
  -2  35   1  815.92   69.19 
   2  35  -1  788.92   61.19 
   2  35  -1  822.72   55.49 
  -2  35   1  803.32   50.29 
   1 -35  -1   72.89   23.70 
  -1 -35   1   33.40   24.30 
   1  35  -1   53.59   14.60 
   1  35  -1   15.20   28.30 
   1  35  -1   34.90   31.10 
  -1  35   1   44.00   31.10 
   1  35  -1   42.30   17.40 
  -1  35   1   41.40   20.80 
   0 -35  -1  464.55   41.70 
   0 -35   1  452.45   41.60 
   0  35   1  401.56   46.70 
   0  35   1  375.66   43.40 
   0  35  -1  461.95   34.60 
   0  35   1  422.56   33.70 
   0  35  -1  412.86   48.20 
   0  35  -1  379.16   45.30 
  -1 -35  -1 1207.48   62.29 
   1 -35   1 1291.87   62.49 
   1  35   1 1256.57   45.10 
  -1  35  -1 1217.08   68.19 
  -1  35  -1 1241.88   65.09 
  -1  35  -1 1294.87   58.89 
   1  35   1 1272.47   64.79 
  -2 -35  -1  955.90   56.39 
  -2  35  -1  966.10   57.19 
   2  35   1 1000.70   67.59 
   2  35   1 1024.60   59.69 
  -2  35  -1  939.21   57.59 
  -2  35  -1 1073.49   63.29 
  -3 -35  -1  -14.20   25.00 
   3  35   1    8.40   34.40 
  -3  35  -1   50.59   30.70 
   3  35   1  -13.90   25.20 
  -3  35  -1   29.60   25.40 
  -3  35  -1   59.59   28.90 
  -3  35  -1   22.90   26.20 
  -4 -35  -1  301.67   38.50 
  -4  35  -1  287.37   40.80 
  -4  35  -1  312.07   34.00 
  -4  35  -1  261.37   52.99 
   4  35   1  336.07   48.50 
   4  35   1  343.27   41.10 
  -4  35  -1  273.07   34.30 
  -5 -35  -1  716.53   64.29 
   5  35   1  573.44   69.09 
  -5  35  -1  666.03   63.59 
   5  35   1  739.43   56.89 
  -5  35  -1  741.53   52.09 
  -5  35  -1  723.43   51.89 
  -5  35  -1  644.64   63.69 
  -6 -35  -1  344.57   47.20 
  -6  35  -1  364.46   52.39 
  -6  35  -1  392.66   49.10 
   6  35   1  284.17   57.29 
   6  35   1  335.17   44.70 
  -6  35  -1  282.47   37.00 
  -6  35  -1  416.96   47.00 
  -6 -36   1   71.19   39.00 
  -6  36   1   87.69   41.10 
  -6  36   1  184.98   42.60 
  -6  36   1   63.59   26.60 
   6  36  -1   99.79   34.80 
   6  36  -1  131.19   51.19 
  -5 -36   1  661.43   58.79 
  -5  36   1  745.83   67.19 
  -5  36   1  637.24   71.09 
   5  36  -1  748.23   61.89 
  -5  36   1  745.83   49.00 
   5  36  -1  609.14   70.89 
  -4 -36   1  641.34   54.69 
   4  36  -1  728.43   69.09 
   4  36  -1  666.33   56.69 
  -4  36   1  656.93   45.10 
  -4  36   1  686.93   63.59 
  -4  36   1  589.44   56.69 
  -3 -36   1   78.09   30.60 
   3  36  -1   38.70   36.00 
  -3  36   1   48.50   34.10 
  -3  36   1   72.99   23.10 
   3  36  -1   28.00   28.50 
  -3  36   1   74.19   28.20 
   2 -36  -1  341.37   37.30 
  -2 -36   1  388.86   47.50 
  -2  36   1  274.47   40.20 
  -2  36   1  304.77   34.10 
  -2  36   1  353.16   38.10 
   2  36  -1  394.66   47.70 
  -1 -36   1  725.33   50.39 
   1 -36  -1  748.53   46.60 
  -1  36   1  680.63   51.69 
   1  36  -1  632.54   57.59 
   1  36  -1  661.43   36.20 
  -1  36   1  696.33   43.80 
   1  36  -1  703.83   52.39 
   1  36  -1  636.04   34.60 
  -1  36   1  698.23   59.59 
   0 -36   1  586.64   46.80 
   0 -36  -1  539.35   46.10 
   0  36  -1  509.05   49.00 
   0  36  -1  493.55   37.90 
   0  36   1  575.24   48.50 
   0  36  -1  455.55   52.99 
   0  36   1  552.34   37.00 
   0  36   1  522.95   55.89 
  -1 -36  -1   -1.60   22.50 
   1 -36   1   -9.10   22.20 
  -1  36  -1    6.30   21.10 
   1  36   1  -13.30   22.20 
  -1  36  -1   12.40   29.90 
  -1  36  -1   20.00   29.60 
   1  36   1   23.10   30.90 
   1  36   1    9.30   11.70 
  -2 -36  -1  318.87   41.10 
  -2  36  -1  295.77   41.60 
  -2  36  -1  219.28   34.30 
   2  36   1  226.78   40.70 
   2  36   1  307.17   37.30 
  -3 -36  -1  694.83   54.29 
  -3  36  -1  688.53   50.29 
  -3  36  -1  641.44   66.19 
   3  36   1  548.45   62.39 
   3  36   1  605.34   51.79 
  -3  36  -1  622.14   54.29 
  -4 -36  -1  568.64   52.89 
  -4  36  -1  400.16   54.19 
   4  36   1  445.66   61.39 
   4  36   1  454.75   50.69 
  -4  36  -1  470.85   46.00 
  -4  36  -1  488.95   55.59 
  -5 -36  -1   48.80   33.80 
  -5  36  -1   14.60   33.30 
  -5  36  -1    6.60   25.80 
   5  36   1   13.50   41.00 
  -5  36  -1   38.40   37.50 
   5  36   1  -12.40   31.40 
  -5 -37   1   52.49   33.90 
  -5  37   1   22.30   38.40 
  -5  37   1   15.50   34.10 
   5  37  -1    9.30   44.20 
  -5  37   1   55.49   26.40 
   5  37  -1   48.00   33.20 
  -4 -37   1  -61.59   29.20 
  -4  37   1   25.40   35.20 
  -4  37   1  -58.09   29.50 
  -4  37   1  -20.40   22.50 
   4  37  -1  -34.80   37.60 
   4  37  -1   77.69   31.90 
  -3 -37   1  -38.20   27.30 
  -3  37   1  -53.79   32.70 
   3  37  -1   36.70   29.90 
  -3  37   1  -11.20   21.70 
  -3  37   1  -22.70   27.00 
   3  37  -1  -27.60   33.50 
   2 -37  -1   -8.70   21.20 
  -2 -37   1   46.80   30.90 
  -2  37   1   38.30   26.20 
  -2  37   1  -10.80   25.80 
  -2  37   1   39.80   33.50 
   2  37  -1    7.00   32.20 
   2  37  -1   41.20   30.80 
   1 -37  -1   14.00   23.30 
  -1 -37   1   30.70   25.70 
   1  37  -1  -10.90   25.70 
   1  37  -1   40.10   53.19 
  -1  37   1   35.50   35.40 
   1  37  -1    9.70   16.60 
  -1  37   1   60.99   25.60 
  -1  37   1   37.60   22.60 
   0 -37   1   41.90   26.00 
   0 -37  -1   29.50   24.20 
   0  37   1   28.30   29.50 
   0  37  -1   25.40   25.70 
   0  37   1   51.09   20.40 
   0  37  -1   15.80   20.30 
   0  37   1   10.00   31.80 
   0  37  -1    4.60   37.60 
  -1 -37  -1   39.00   28.30 
   1 -37   1   53.79   26.10 
   1  37   1   48.90   12.70 
   1  37   1   13.80   26.40 
  -1  37  -1   10.30   22.90 
  -1  37  -1   48.80   28.70 
  -1  37  -1   89.69   38.90 
   1  37   1   22.30   32.10 
  -2 -37  -1   -2.20   25.40 
  -2  37  -1  -42.50   25.20 
   2  37   1   14.30   32.00 
  -2  37  -1    1.30   27.50 
   2  37   1   22.00   27.90 
  -3 -37  -1   43.40   28.80 
   3  37   1   -3.50   36.20 
  -3  37  -1   21.00   25.70 
   3  37   1   13.60   29.50 
  -3  37  -1   10.60   31.20 
  -3  37  -1   30.20   31.50 
  -3  37  -1  -11.20   27.20 
  -4 -37  -1   32.30   30.00 
  -4  37  -1   -1.40   34.20 
  -4  37  -1   25.00   34.20 
   4  37   1   36.20   30.20 
  -4  37  -1   37.90   27.40 
   4  37   1    4.10   36.30 
  -4  37  -1   16.00   24.70 
  -5 -37  -1   36.90   35.90 
  -5  37  -1  -54.19   36.80 
   5  37   1  -29.50   32.10 
   5  37   1  -12.50   42.80 
  -5  37  -1   -4.00   29.10 
  -5  37  -1   67.59   29.90 
  -5  37  -1    6.40   33.50 
  -5 -38   1  167.98   41.70 
   5  38  -1  176.58   42.60 
  -5  38   1  188.68   44.20 
   5  38  -1  147.19   49.60 
  -5  38   1  191.18   31.00 
  -5  38   1  133.69   40.50 
  -4 -38   1  449.36   56.79 
  -4  38   1  298.97   34.30 
  -4  38   1  290.67   48.50 
   4  38  -1  322.57   44.10 
   4  38  -1  303.07   52.69 
  -4  38   1  282.07   40.20 
  -3 -38   1   22.20   32.00 
   3  38  -1   78.59   34.60 
  -3  38   1   73.09   26.20 
  -3  38   1   61.59   31.60 
   3  38  -1   62.99   40.00 
  -3  38   1   95.49   32.60 
  -3  38   1   41.30   37.80 
  -2 -38   1   83.39   31.40 
   2  38  -1   67.59   32.30 
  -2  38   1   73.49   35.70 
   2  38  -1   39.00   32.60 
  -2  38   1   76.99   30.40 
  -2  38   1   32.60   27.30 
   1 -38  -1  501.45   45.00 
  -1  38   1  445.76   47.80 
  -1  38   1  536.25   59.69 
   1  38  -1  438.56   49.60 
   1  38  -1  521.25   33.90 
   1  38  -1  513.75   56.39 
  -1  38   1  455.65   42.40 
   0 -38   1  439.46   44.90 
   0 -38  -1  507.35   44.50 
   0  38  -1  463.35   58.49 
   0  38  -1  471.05   48.80 
   0  38  -1  412.36   37.60 
   0  38   1  419.56   35.50 
   0  38   1  391.46   46.70 
   0  38   1  416.66   48.80 
   1 -38   1  -18.90   25.30 
  -1 -38  -1   33.60   27.00 
   1  38   1    0.60   33.20 
   1  38   1   24.00   14.40 
   1  38   1   -7.20   27.50 
  -1  38  -1   14.40   34.80 
  -1  38  -1   47.70   24.70 
  -1  38  -1    6.70   27.20 
  -2 -38  -1  191.28   37.60 
   2  38   1  195.08   35.60 
   2  38   1  181.08   43.10 
  -2  38  -1  240.48   34.40 
  -2  38  -1  204.98   35.10 
  -2  38  -1  181.68   41.60 
  -3 -38  -1  182.38   35.90 
  -3  38  -1  120.59   35.20 
  -3  38  -1  206.78   38.80 
   3  38   1  161.38   38.60 
  -3  38  -1  161.28   32.40 
  -3  38  -1  155.48   33.70 
   3  38   1  101.59   39.90 
  -4 -38  -1   84.29   33.90 
  -4  38  -1   92.99   30.10 
  -4  38  -1   94.99   31.50 
   4  38   1  111.99   44.60 
   4  38   1   80.09   31.90 
  -4  38  -1   50.79   35.20 
  -4  38  -1   55.99   48.00 
  -4 -39   1  166.38   37.90 
  -4  39   1  158.18   33.50 
  -4  39   1  192.88   40.30 
  -4  39   1  138.39   44.40 
   4  39  -1  127.39   43.30 
   4  39  -1  167.98   40.60 
  -3 -39   1  905.11   67.69 
  -3  39   1 1006.90   62.99 
  -3  39   1  853.41   72.39 
  -3  39   1  873.21   61.29 
  -3  39   1  982.80   55.89 
   3  39  -1  942.51   77.19 
   3  39  -1  935.21   64.09 
  -2 -39   1  391.56   51.09 
  -2  39   1  338.57   48.30 
  -2  39   1  269.17   37.90 
   2  39  -1  355.76   47.80 
   2  39  -1  353.96   43.10 
  -2  39   1  349.67   37.40 
  -1 -39   1   57.09   30.20 
   1 -39  -1   20.70   24.80 
  -1  39   1   14.80   27.70 
  -1  39   1   18.20   25.20 
   1  39  -1   -5.80   27.90 
   1  39  -1   36.50   36.50 
   1  39  -1   -8.90   19.90 
  -1  39   1   70.49   39.60 
   0 -39  -1  402.26   45.60 
   0 -39   1  292.57   59.79 
   0  39  -1  361.56   40.80 
   0  39   1  383.26   49.70 
   0  39   1  388.96   42.60 
   0  39  -1  277.27   45.60 
   0  39  -1  361.86   38.20 
   0  39   1  291.67   35.70 
  -1 -39  -1  986.40   68.99 
   1 -39   1  817.82   59.59 
   1  39   1  870.21   60.89 
  -1  39  -1  835.42   67.59 
  -1  39  -1  801.02   60.99 
   1  39   1  835.92   68.59 
  -1  39  -1  869.11   54.09 
  -2 -39  -1  908.61   58.59 
  -2  39  -1  804.52   57.89 
  -2  39  -1  820.72   58.39 
   2  39   1  791.12   61.79 
   2  39   1  856.21   72.49 
  -2  39  -1  936.31   68.69 
  -3 -39  -1   37.10   29.30 
   3  39   1   71.89   34.40 
  -3  39  -1   57.49   34.30 
  -3  39  -1   82.39   40.30 
  -3  39  -1   34.50   29.40 
   3  39   1    8.30   39.80 
  -3  39  -1  -24.30   30.60 
  -4 -39  -1  521.05   57.09 
  -4  39  -1  368.86   49.30 
   4  39   1  350.76   53.09 
  -4  39  -1  394.56   43.90 
  -4  39  -1  482.35   49.70 
  -4  39  -1  336.17   48.50 
   4  39   1  451.35   55.49 
  -4  40   1  148.09   33.70 
  -3 -40   1   35.40   34.00 
  -3  40   1   -9.60   31.40 
  -3  40   1   39.60   31.60 
  -3  40   1   37.70   26.60 
  -3  40   1   19.00   38.00 
   3  40  -1   -6.40   33.30 
   3  40  -1   30.20   43.50 
  -2 -40   1   77.59   36.50 
   2  40  -1   56.09   33.50 
   2  40  -1   73.69   41.60 
  -2  40   1   40.10   29.80 
  -2  40   1   33.80   40.80 
  -2  40   1   58.79   30.80 
   1 -40  -1  347.37   44.60 
  -1 -40   1  427.86   51.69 
   1  40  -1  325.67   41.10 
   1  40  -1  416.76   52.69 
  -1  40   1  348.37   50.19 
  -1  40   1  425.36   44.60 
  -1  40   1  467.35   54.59 
   0 -40  -1  443.06   47.70 
   0 -40   1  402.16   43.60 
   0  40   1  420.06   53.29 
   0  40   1  434.36   39.60 
   0  40  -1  448.26   47.30 
   0  40   1  393.26   45.20 
   0  40  -1  389.16   41.40 
   0  40  -1  431.86   52.19 
  -1 -40  -1   19.30   29.30 
  -1  40  -1  -28.00   26.00 
   1  40   1  -82.79   34.10 
  -1  40  -1  -24.30   32.70 
  -1  40  -1    6.10   36.60 
   1  40   1    3.00   30.90 
  -2 -40  -1   97.89   35.40 
  -2  40  -1  179.28   35.20 
  -2  40  -1  190.08   33.40 
   2  40   1  168.78   47.10 
   2  40   1  194.08   37.40 
  -2  40  -1  177.58   41.50 
  -3 -40  -1  294.17   41.30 
   3  40   1  362.96   46.40 
   3  40   1  305.37   55.59 
  -3  40  -1  329.47   45.50 
  -3  40  -1  344.77   44.60 
  -3  40  -1  376.76   49.00 
  -3  41   1   18.10   28.80 
  -2 -41   1   30.90   32.10 
   2  41  -1   -0.20   34.40 
  -2  41   1  -19.20   30.20 
  -2  41   1   24.30   33.20 
  -2  41   1    8.60   39.30 
   2  41  -1  -39.70   39.80 
  -1 -41   1   57.19   32.90 
   1 -41  -1  -26.00   25.90 
   1  41  -1   16.10   32.90 
  -1  41   1   -7.80   38.90 
  -1  41   1  -19.80   26.40 
   1  41  -1  -14.80   38.10 
  -1  41   1   41.20   33.20 
   0 -41   1  -68.69   27.80 
   0  41   1  -93.49   37.60 
   0  41  -1    5.80   37.90 
   0  41   1  -13.50   31.50 
   0  41  -1   13.80   34.50 
  -1 -41  -1   54.49   31.30 
  -1  41  -1   -7.70   31.70 
  -1  41  -1   39.00   36.90 
   1  41   1   -6.60   39.90 
  -1  41  -1   -1.20   25.80 
   1  41   1   47.40   34.40 
  -2 -41  -1   10.00   33.30 
   2  41   1   43.70   36.90 
  -2  41  -1   45.10   28.90 
  -2  41  -1   25.10   39.50 
  -2  41  -1    5.80   30.50 
  -2  41  -1  -38.60   31.50 
   2  41   1    4.70   41.20 
   0 -42  -1  320.87   39.00 
   0 -42   1  284.07   41.60 
   0  42  -1  305.97   52.09 
   0  42  -1  316.17   44.70 
   0  42   1  280.67   53.79 
   0  42   1  302.27   42.10 
  12   0  -2  510.15   61.99 
  12   0  -2  462.05   48.30 
 -12   0   2  521.55   63.79 
 -12   0   2  482.95   62.89 
  11   0  -2   12.20   21.80 
 -11   0   2  -25.60   29.30 
 -11   0   2   33.20   29.70 
  11   0  -2   46.10   34.30 
 -10   0   2  569.64   36.30 
 -10   0   2  523.75   50.99 
  10   0  -2  504.55   55.59 
  10   0  -2  577.24   42.40 
 -10   0   2  554.14   47.20 
   9   0  -2 1498.85   61.49 
  -9   0   2 1563.64   66.99 
   9   0  -2 1483.15   75.39 
  -9   0   2 1565.24   69.89 
   9   0  -2 1435.66   60.39 
  -9   0   2 1454.95   59.19 
  -8   0   2  520.05   39.10 
   8   0  -2  482.25   45.30 
  -8   0   2  459.95   30.90 
   8   0  -2  542.95   33.40 
  -8   0   2  555.84   42.20 
   8   0  -2  557.04   35.80 
  -7   0   2  577.34   36.30 
  -7   0   2  545.05   28.90 
  -7   0   2  543.85   37.00 
   7   0  -2  501.75   31.70 
  -7   0   2  537.15   37.40 
   7   0  -2  592.34   31.20 
   7   0  -2  498.05   41.10 
  -6   0   2 1909.71   63.49 
  -6   0   2 1806.62   66.39 
  -6   0   2 1813.82   68.19 
   6   0  -2 1897.71   65.59 
   6   0  -2 1870.21   71.99 
  -6   0   2 1861.31   69.89 
   6   0  -2 1935.21   64.99 
  -5   0   2 1113.09   43.50 
   5   0  -2 1167.48   44.00 
   5   0  -2 1157.48   48.90 
   5   0  -2 1138.19   43.90 
  -5   0   2 1101.79   45.00 
  -5   0   2 1116.99   42.30 
   5   0  -2 1052.49   45.40 
  -5   0   2 1180.08   48.50 
   4   0  -2  384.26   19.50 
  -4   0   2  430.26   25.00 
  -4   0   2  373.86   26.50 
  -4   0   2  366.86   19.70 
   4   0  -2  345.37   24.60 
   4   0  -2  376.66   25.60 
  -3   0   2 1488.15   48.50 
   3   0  -2 1580.54   51.29 
   3   0  -2 1563.94   48.80 
   3   0  -2 1513.55   50.89 
  -3   0   2 1574.34   50.59 
  -3   0   2 1555.84   52.49 
   3   0  -2 1522.25   52.49 
  -3   0   2 1491.75   51.39 
   2   0  -2 3136.89   91.49 
  -2   0   2 3080.79   91.69 
  -2   0   2 2952.00   90.99 
  -2   0   2 3068.09   90.99 
   2   0  -2 2937.11   88.39 
  -2   0   2 2798.92   88.19 
   2   0  -2 2984.60   91.19 
   1   0  -2 1309.27   41.20 
   1   0  -2 1250.07   38.80 
  -1   0   2 1263.87   40.20 
   1   0  -2 1196.68   38.40 
  -1   0   2 1251.47   38.80 
   1   0  -2 1191.58   40.00 
  -1   0   2 1220.28   40.70 
   0   0   2  391.86   19.10 
   0   0   2  384.76   15.90 
   0   0  -2  389.16   16.00 
   0   0   2  398.86   13.90 
   0   0   2  380.66   16.80 
   0   0  -2  400.56   19.30 
  -1   0  -2 1381.96   42.30 
  -1   0  -2 1270.67   45.10 
  -1   0  -2 1394.36   45.50 
   1   0   2 1312.87   40.10 
  -1   0  -2 1276.67   40.00 
   1   0   2 1374.86   42.80 
   2   0   2 4563.94  135.69 
  -2   0  -2 4607.94  137.69 
  -2   0  -2 4826.92  135.99 
   2   0   2 4344.27  130.49 
   2   0   2 4473.15  136.89 
   2   0   2 4427.46  130.39 
  -3   0  -2 1093.59   45.20 
  -3   0  -2 1197.18   43.70 
   3   0   2 1176.48   34.80 
   3   0   2 1173.18   43.70 
   3   0   2 1107.29   43.20 
   3   0   2 1195.18   34.80 
   4   0   2  368.66   27.30 
   4   0   2  388.76   14.60 
   4   0   2  395.56   14.50 
   4   0   2  410.26   25.30 
  -4   0  -2  415.16   30.20 
  -4   0  -2  385.16   27.20 
   5   0   2  366.36   25.90 
  -5   0  -2  362.06   32.00 
   5   0   2  340.37   14.80 
  -5   0  -2  387.36   28.90 
   5   0   2  329.47   29.50 
   6   0   2 2528.95   79.59 
   6   0   2 2841.62   92.99 
  -6   0  -2 2596.14   94.99 
   6   0   2 2621.04   94.99 
  -6   0  -2 2649.33   94.79 
   7   0   2 1511.35   49.20 
   7   0   2 1646.64   64.19 
  -7   0  -2 1488.35   68.99 
   7   0   2 1523.85   68.29 
  -7   0  -2 1460.75   67.49 
   8   0   2  104.09   28.40 
  -8   0  -2   84.79   27.00 
   8   0   2  114.09   14.20 
  -8   0  -2  137.49   29.50 
  -9   0  -2 1184.88   68.39 
  -9   0  -2 1026.30   62.29 
   9   0   2 1035.40   37.30 
   9   0   2  978.90   36.30 
   9   0   2 1149.08   66.09 
  10   0   2 1349.66   76.39 
 -10   0  -2 1320.47   75.79 
 -10   0  -2 1188.98   69.39 
  10   0   2 1247.68   45.00 
 -11   0  -2  302.37   45.10 
 -11   0  -2  235.78   48.60 
  11   0   2  229.28   44.60 
  12  -1  -2  274.07   51.39 
 -12  -1   2  192.18   40.90 
  12  -1  -2  244.08   31.30 
 -12  -1   2  270.37   40.40 
  12   1  -2  304.37   50.79 
 -12   1   2  244.68   43.60 
  12   1  -2  233.08   33.40 
 -11  -1   2  585.14   53.69 
 -11  -1   2  490.35   51.89 
  11  -1  -2  508.05   43.50 
  11  -1  -2  573.44   63.69 
  11   1  -2  545.95   44.90 
 -11   1   2  482.75   51.19 
  11   1  -2  549.45   64.39 
 -11   1   2  539.75   57.19 
 -10  -1   2  250.47   36.40 
 -10  -1   2  247.78   33.90 
  10  -1  -2  223.58   40.00 
  10  -1  -2  245.68   26.70 
 -10  -1   2  175.68   22.40 
 -10   1   2  202.28   24.50 
  10   1  -2  272.67   29.00 
 -10   1   2  253.77   35.50 
  10   1  -2  171.48   36.70 
 -10   1   2  234.08   32.80 
  -9  -1   2   16.00   23.00 
  -9  -1   2   -7.60   15.80 
  -9  -1   2   51.49   24.60 
   9  -1  -2   -8.00   25.60 
   9  -1  -2    8.10   17.90 
   9  -1  -2   20.00   15.50 
   9   1  -2   -1.60   25.30 
   9   1  -2    6.80   15.90 
   9   1  -2    6.00   17.90 
  -9   1   2    0.70   23.10 
  -9   1   2   -8.90   16.00 
  -9   1   2   33.20   25.30 
  -8  -1   2  508.65   40.20 
  -8  -1   2  491.95   30.80 
   8  -1  -2  502.05   34.40 
  -8  -1   2  519.55   39.40 
   8  -1  -2  511.05   45.00 
   8   1  -2  574.84   46.70 
  -8   1   2  459.65   31.30 
   8   1  -2  527.25   35.10 
  -8   1   2  544.35   37.50 
   8   1  -2  528.15   33.50 
  -8   1   2  570.64   42.10 
  -7  -1   2  816.32   41.90 
   7  -1  -2  829.02   46.80 
   7  -1  -2  933.81   39.30 
   7  -1  -2  798.92   39.90 
  -7  -1   2  856.31   44.30 
  -7  -1   2  918.41   47.00 
  -7  -1   2  893.31   37.70 
   7   1  -2  790.62   38.70 
  -7   1   2  899.71   46.30 
  -7   1   2  892.11   45.30 
  -7   1   2  868.81   37.20 
  -7   1   2  818.52   41.60 
   7   1  -2  916.31   40.90 
   7   1  -2  753.62   47.80 
  -6  -1   2 1100.49   41.70 
   6  -1  -2 1063.99   41.80 
  -6  -1   2 1104.89   46.50 
   6  -1  -2 1074.09   50.49 
  -6  -1   2 1071.89   48.20 
  -6  -1   2 1104.19   45.00 
   6  -1  -2 1067.69   43.20 
   6   1  -2 1045.00   43.00 
  -6   1   2 1078.49   48.50 
   6   1  -2  972.50   48.80 
  -6   1   2 1068.39   41.70 
  -6   1   2 1163.78   48.10 
  -6   1   2 1061.19   44.00 
   6   1  -2 1027.50   43.40 
   5  -1  -2    9.10   10.70 
   5  -1  -2    7.30   11.00 
  -5  -1   2    0.70   11.20 
   5  -1  -2   21.50   11.00 
  -5  -1   2   -1.50   12.10 
  -5  -1   2   20.50    9.90 
  -5  -1   2   12.30   14.20 
   5  -1  -2    3.20   14.60 
  -5   1   2   12.50    9.50 
  -5   1   2    6.30   10.90 
  -5   1   2   15.20   12.90 
   5   1  -2   17.70   10.40 
  -5   1   2   17.40   12.80 
   5   1  -2    3.80   15.30 
   5   1  -2   -3.60   11.10 
   5   1  -2   15.90   10.10 
  -4  -1   2  660.73   28.30 
  -4  -1   2  752.32   33.60 
  -4  -1   2  708.63   32.70 
   4  -1  -2  693.13   32.90 
   4  -1  -2  737.83   27.90 
  -4  -1   2  609.54   31.80 
   4   1  -2  773.12   29.10 
  -4   1   2  723.53   27.60 
   4   1  -2  739.53   30.70 
  -4   1   2  728.63   32.90 
   4   1  -2  719.03   33.90 
   4   1  -2  720.13   31.30 
  -4   1   2  704.03   32.00 
   3  -1  -2  977.90   37.50 
   3  -1  -2 1049.00   37.00 
   3  -1  -2  998.30   33.40 
   3  -1  -2  961.60   36.00 
  -3  -1   2  970.90   34.10 
  -3  -1   2 1014.80   36.60 
  -3  -1   2 1005.00   35.60 
  -3  -1   2 1010.90   37.70 
  -3   1   2 1034.40   37.90 
  -3   1   2  953.80   33.00 
  -3   1   2 1002.80   36.80 
   3   1  -2 1009.70   34.40 
   3   1  -2 1033.10   36.70 
  -3   1   2 1021.30   36.00 
   3   1  -2 1071.19   36.20 
   3   1  -2  992.00   37.70 
   2  -1  -2  493.75   21.80 
  -2  -1   2  440.96   21.40 
   2  -1  -2  453.25   21.70 
  -2  -1   2  475.15   21.60 
   2  -1  -2  444.16   16.90 
  -2  -1   2  480.15   18.60 
  -2  -1   2  469.65   21.60 
   2   1  -2  439.26   21.70 
  -2   1   2  450.75   20.50 
  -2   1   2  459.75   21.40 
  -2   1   2  464.05   16.90 
   2   1  -2  435.76   21.10 
   2   1  -2  439.26   18.10 
   2   1  -2  487.45   21.70 
  -2   1   2  486.65   22.00 
  -1  -1   2  892.11   30.10 
   1  -1  -2  856.21   31.00 
  -1  -1   2  893.51   29.40 
  -1  -1   2  885.71   31.00 
   1  -1  -2  904.81   29.00 
   1  -1  -2  912.51   28.90 
   1  -1  -2  953.10   32.50 
   1  -1  -2  936.01   30.30 
  -1   1   2  888.91   31.90 
  -1   1   2  906.91   30.10 
  -1   1   2  941.51   31.40 
   1   1  -2  892.61   29.80 
   1   1  -2  930.61   29.50 
   1   1  -2  975.40   32.20 
   0  -1  -2  594.64   22.10 
   0  -1  -2  652.53   24.50 
   0  -1   2  636.34   25.40 
   0  -1   2  636.24   23.50 
   0  -1  -2  637.24   23.40 
   0  -1   2  647.64   22.20 
   0   1  -2  649.93   25.20 
   0   1   2  628.94   22.40 
   0   1   2  653.03   21.40 
   0   1   2  615.34   23.10 
   0   1  -2  579.64   23.30 
   0   1  -2  649.24   22.40 
   0   1   2  660.63   25.30 
  -1  -1  -2 3349.96   96.79 
   1  -1   2 3285.97   96.09 
  -1  -1  -2 3328.97   98.49 
   1  -1   2 3334.87   98.19 
  -1  -1  -2 3430.86  100.39 
  -1  -1  -2 3298.47  100.89 
   1  -1   2 3251.47  100.29 
  -1   1  -2 3342.47   97.89 
   1   1   2 3201.48   96.69 
   1   1   2 3340.57  100.59 
  -1   1  -2 3188.28  100.59 
  -1   1  -2 3498.75  101.19 
  -1   1  -2 3250.87   96.09 
   1   1   2 3325.57   98.79 
  -2  -1  -2  760.82   31.20 
   2  -1   2  703.23   28.30 
   2  -1   2  740.33   29.60 
  -2  -1  -2  790.62   29.40 
  -2   1  -2  695.43   30.20 
   2   1   2  770.02   30.20 
   2   1   2  732.53   23.20 
   2   1   2  763.42   23.40 
  -2   1  -2  759.22   29.00 
   2   1   2  738.63   29.60 
   3  -1   2  315.37   21.60 
  -3  -1  -2  408.96   23.40 
   3  -1   2  409.16   22.10 
  -3  -1  -2  374.66   25.90 
  -3   1  -2  361.76   24.90 
   3   1   2  328.07   22.30 
   3   1   2  372.96   13.50 
   3   1   2  353.16   21.50 
   3   1   2  373.76   13.50 
  -3   1  -2  373.46   22.60 
   4  -1   2 1247.38   49.80 
   4  -1   2 1233.78   38.10 
  -4  -1  -2 1297.27   49.80 
   4  -1   2 1291.57   48.90 
  -4  -1  -2 1288.57   52.29 
   4   1   2 1293.37   39.50 
  -4   1  -2 1287.47   49.99 
   4   1   2 1249.18   39.30 
  -4   1  -2 1264.27   51.09 
   4   1   2 1251.27   48.30 
   4   1   2 1228.58   49.80 
   5  -1   2  857.21   39.40 
  -5  -1  -2  880.41   42.70 
  -5  -1  -2  957.40   45.30 
   5  -1   2  886.41   28.20 
   5  -1   2  822.42   42.60 
   5   1   2  868.91   29.40 
  -5   1  -2  895.91   44.50 
   5   1   2  768.52   38.20 
  -5   1  -2  895.51   41.60 
   5   1   2  891.21   43.50 
   6  -1   2   -2.90   17.90 
  -6  -1  -2   21.10   19.30 
   6  -1   2   -2.10    5.40 
   6  -1   2    4.70   12.60 
  -6  -1  -2   26.60   17.80 
  -6   1  -2    8.10   23.40 
   6   1   2  -12.70   17.30 
   6   1   2    4.30    6.60 
  -6   1  -2   18.50   19.40 
   6   1   2   -9.10   11.30 
   7  -1   2  354.36   17.00 
   7  -1   2  329.47   40.20 
   7  -1   2  328.27   29.40 
  -7  -1  -2  417.86   43.60 
  -7  -1  -2  372.76   37.10 
  -7   1  -2  358.06   40.10 
   7   1   2  366.16   36.20 
   7   1   2  317.57   39.40 
   7   1   2  332.57   18.10 
  -7   1  -2  308.27   32.70 
  -8  -1  -2  800.92   50.89 
   8  -1   2  826.72   29.50 
   8  -1   2  826.42   55.79 
  -8  -1  -2  807.92   54.49 
   8   1   2  806.72   30.90 
  -8   1  -2  821.62   51.89 
  -8   1  -2  770.12   55.89 
   8   1   2  756.22   54.69 
   9  -1   2  251.07   15.90 
  -9  -1  -2  239.08   38.10 
  -9  -1  -2  213.28   34.40 
   9  -1   2  367.96   43.80 
  -9   1  -2  291.87   37.90 
   9   1   2  276.57   18.50 
  -9   1  -2  232.48   36.40 
   9   1   2  229.88   37.60 
   9   1   2  238.38   17.10 
 -10  -1  -2   40.00   36.90 
 -10  -1  -2   68.19   31.40 
  10  -1   2   29.50   34.70 
 -10   1  -2   35.90   30.90 
  10   1   2   41.00   10.30 
  10   1   2   71.99   35.40 
 -10   1  -2   47.30   32.90 
 -11  -1  -2   30.90   33.70 
 -11  -1  -2   88.19   41.30 
  11  -1   2   96.59   39.40 
 -11   1  -2   99.09   45.40 
  11   1   2   34.30   39.30 
 -11   1  -2   46.20   37.20 
  12  -2  -2  -17.20   40.90 
 -12  -2   2   18.90   34.30 
  12  -2  -2    3.20   25.50 
 -12  -2   2  -12.30   33.80 
 -12   2   2   79.49   36.10 
 -12   2   2   58.69   37.60 
  12   2  -2  -28.30   24.20 
  12   2  -2   50.19   40.50 
 -11  -2   2   -9.40   29.10 
 -11  -2   2   52.19   30.30 
  11  -2  -2    2.10   20.20 
  11  -2  -2   29.80   36.30 
 -11   2   2    4.80   23.70 
  11   2  -2    1.80   36.10 
  11   2  -2   -6.60   22.50 
 -11   2   2   -8.10   27.80 
 -11   2   2    3.50   32.20 
  10  -2  -2   12.50   29.90 
 -10  -2   2   38.00   27.20 
 -10  -2   2   -9.90   25.10 
  10  -2  -2   13.20   18.90 
  10   2  -2   15.30   21.50 
 -10   2   2    2.80   18.30 
 -10   2   2   29.10   27.30 
 -10   2   2   14.10   25.20 
  10   2  -2   10.40   29.80 
   9  -2  -2    6.90   16.40 
  -9  -2   2   38.10   23.10 
   9  -2  -2   -3.40   24.00 
  -9  -2   2   18.00   14.80 
  -9  -2   2   26.90   24.30 
  -9   2   2   -7.90   22.10 
   9   2  -2  -22.20   15.70 
  -9   2   2   -6.70   15.60 
   9   2  -2  -10.10   27.30 
   9   2  -2   10.90   16.90 
  -9   2   2   12.70   24.90 
  -8  -2   2   -3.00   14.40 
   8  -2  -2    7.00   12.50 
  -8  -2   2   13.90   19.60 
   8  -2  -2  -14.60   22.70 
  -8  -2   2  -24.90   17.60 
   8  -2  -2    7.90   15.60 
  -8   2   2   -7.50   13.30 
  -8   2   2    9.40   22.00 
   8   2  -2   13.20   16.40 
  -8   2   2  -21.40   16.90 
   8   2  -2  -12.80   13.90 
   8   2  -2  -16.90   24.30 
   7  -2  -2  -22.20   17.90 
   7  -2  -2    9.60   14.60 
  -7  -2   2    5.10   16.50 
   7  -2  -2  -10.00    9.80 
  -7  -2   2    5.00   15.70 
  -7  -2   2    7.20   11.10 
  -7  -2   2   13.20   15.70 
  -7   2   2    2.40   15.10 
  -7   2   2    8.40   12.10 
   7   2  -2    5.40   13.30 
   7   2  -2   37.20   13.70 
  -7   2   2   28.60   19.70 
  -7   2   2   26.00   16.50 
   7   2  -2    2.20   20.80 
  -6  -2   2  115.49   19.70 
  -6  -2   2   62.49   15.30 
   6  -2  -2   91.39   12.90 
   6  -2  -2   60.59   17.90 
  -6  -2   2   83.59   16.50 
   6  -2  -2   55.39   13.70 
  -6  -2   2   79.69   12.60 
  -6   2   2   88.49   13.10 
  -6   2   2  112.79   19.20 
   6   2  -2   83.69   14.80 
   6   2  -2   89.59   14.00 
  -6   2   2   71.59   15.00 
   6   2  -2   99.09   21.00 
  -6   2   2  108.89   19.10 
  -5  -2   2  199.78   18.40 
   5  -2  -2  191.18   16.60 
  -5  -2   2  200.88   22.00 
   5  -2  -2  200.78   18.90 
   5  -2  -2  193.08   19.60 
  -5  -2   2  188.98   21.00 
   5  -2  -2  174.38   21.10 
  -5  -2   2  209.68   21.30 
  -5   2   2  161.08   19.10 
   5   2  -2  193.68   18.90 
   5   2  -2  191.18   20.60 
   5   2  -2  182.68   18.20 
  -5   2   2  183.58   18.00 
  -5   2   2  163.18   17.00 
  -5   2   2  144.69   18.10 
   5   2  -2  178.08   21.40 
  -4  -2   2  137.99   18.90 
  -4  -2   2  176.98   15.50 
   4  -2  -2  182.78   13.40 
   4  -2  -2  155.48   19.90 
   4  -2  -2  192.58   17.10 
  -4  -2   2  181.08   16.30 
  -4  -2   2  176.38   16.40 
   4   2  -2  165.28   15.00 
  -4   2   2  161.08   13.60 
   4   2  -2  202.88   15.90 
   4   2  -2  179.78   21.90 
  -4   2   2  151.88   18.40 
   4   2  -2  151.08   17.80 
  -4   2   2  173.88   20.10 
  -3  -2   2   -7.00    9.20 
   3  -2  -2    3.10    5.30 
   3  -2  -2    5.20    7.70 
   3  -2  -2   -0.50    8.00 
  -3  -2   2   -3.80    5.90 
   3  -2  -2   -3.70    7.80 
  -3  -2   2   -1.20    6.90 
  -3  -2   2   13.00    8.50 
   3   2  -2   -9.30    8.60 
   3   2  -2    6.50    6.20 
   3   2  -2    3.50    6.60
[truncated: 1,565,868 more chars]
